# Supplementary material for: Identification of Diabetic Retinopathy Genes through a Genome-Wide Association Study among Mexican-Americans from Starr County, Texas
Source: Hindawi journal article supplement (doi:10.1155/2010/861291), 2010-01-01

**Supplementary Figure 1. Q-Q plot of logistic regression models adjusted for age, gender, diabetes duration and HbA1C level.**

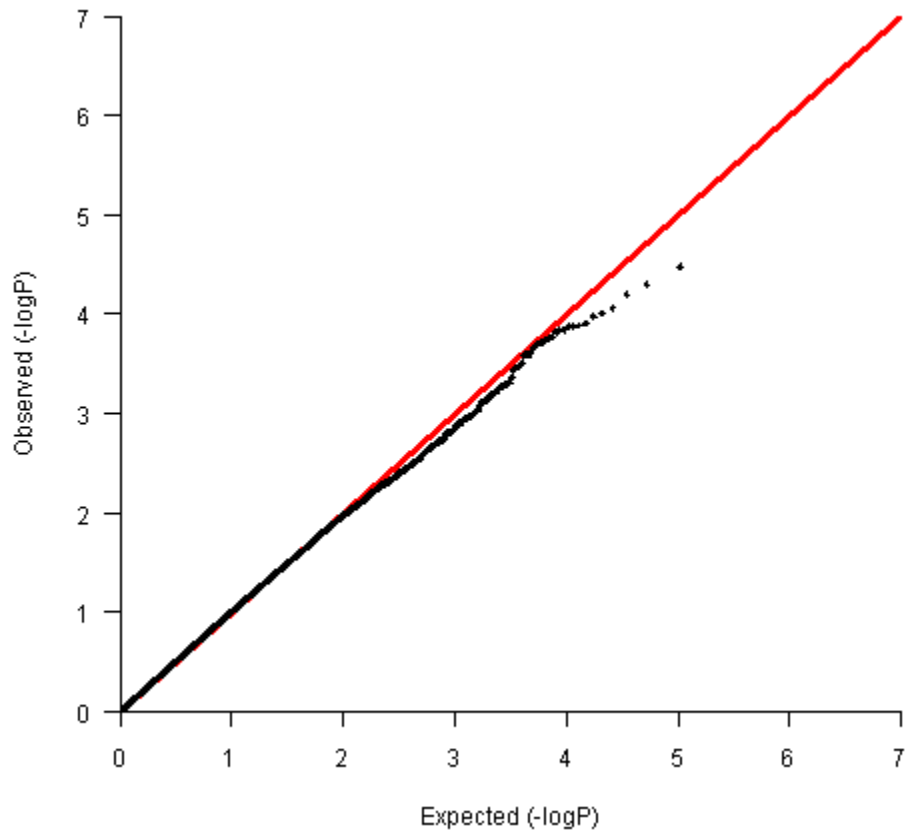

Supplement: f1 [file 861291.f1.pdf]
