# Supplementary material for: Identification of Diabetic Retinopathy Genes through a Genome-Wide Association Study among Mexican-Americans from Starr County, Texas
Source: Hindawi journal article supplement (doi:10.1155/2010/861291), 2010-01-01

**Supplementary Figure 2. Q-Q plot of SNPs located in coding region of 208 diabetic retinopathy candidate genes.**

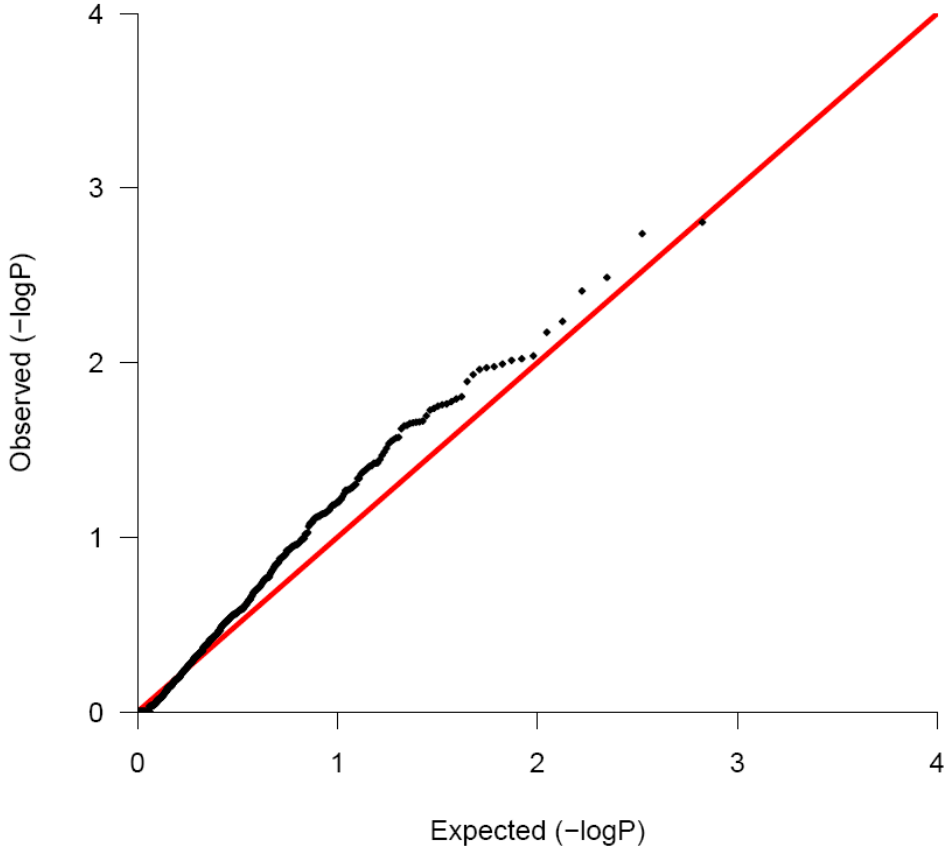

Supplement: f2 [file 861291.f2.pdf]
