# Supplementary material for: Identification of Diabetic Retinopathy Genes through a Genome-Wide Association Study among Mexican-Americans from Starr County, Texas
Source: Hindawi journal article supplement (doi:10.1155/2010/861291), 2010-01-01
Supplement: f3 [file 861291.f3.pdf]

Supplementary Table 1. Detail information of SNPs with p-values of Fisher's Exact allelic test less than 0.05

| SNP rs ID  | Chr. | Physical position | Minor allele frequency | Genotype call rate | p-values for Exact tests of Hardy Weinberg Equilibrium |               | p-values of association tests |                                                                       | Transcript accession | SNP-gene relationship | Distance to the nearest gene | Unigene cluster ID | Nearest gene symbol |
|------------|------|-------------------|------------------------|--------------------|--------------------------------------------------------|---------------|-------------------------------|-----------------------------------------------------------------------|----------------------|-----------------------|------------------------------|--------------------|---------------------|
|            |      |                   |                        |                    | All Samples                                            | Controls Only | Fisher's Exact allelic test   | Additive model adjusted for age, gender, diabetes duration, and HbA1C |                      |                       |                              |                    |                     |
| rs1889031  | 10   | 36887259          | 0.4594                 | 95.09%             | 0.002154                                               | 0.067340      | 0.00003639                    | 0.00428400                                                            | ENST00000279434      | upstream              | 34091                        | ---                | ---                 |
| rs599019   | 18   | 284495            | 0.0950                 | 97.89%             | 0.289100                                               | 0.512600      | 0.00003639                    | 0.00040560                                                            | NM_030781            | downstream            | 24861                        | ---                | COLEC12             |
| rs2505585  | 10   | 36888999          | 0.4896                 | 84.56%             | 0.001016                                               | 0.015590      | 0.00005081                    | 0.00373900                                                            | ENST00000279434      | upstream              | 35831                        | ---                | ---                 |
| rs3761296  | 20   | 16657662          | 0.3182                 | 92.63%             | 0.888000                                               | 1.000000      | 0.00005412                    | 0.00257500                                                            | NM_198220            | upstream              | 980                          | Hs.280378          | SNRPB2              |
| rs2300782  | 5    | 110816684         | 0.3873                 | 85.61%             | 0.787200                                               | 1.000000      | 0.00005741                    | 0.00006040                                                            | NM_001744            | intron                | 0                            | Hs.591269          | CAMK4               |
| rs10519765 | 15   | 30992716          | 0.2378                 | 86.32%             | 0.725000                                               | 1.000000      | 0.00006387                    | 0.00006208                                                            | ENST00000334528      | intron                | 0                            | ---                | ---                 |
| rs1537328  | 10   | 36889598          | 0.4640                 | 97.54%             | 0.003751                                               | 0.131900      | 0.00006393                    | 0.00622500                                                            | ENST00000279434      | upstream              | 36430                        | ---                | ---                 |
| rs2483021  | 10   | 36887138          | 0.4640                 | 97.54%             | 0.003751                                               | 0.131900      | 0.00006393                    | 0.00622500                                                            | ENST00000279434      | upstream              | 33970                        | ---                | ---                 |
| rs10495528 | 2    | 5975298           | 0.3638                 | 90.18%             | 1.000000                                               | 0.875000      | 0.00007279                    | 0.00068320                                                            | NM_003108            | downstream            | 216330                       | Hs.432638          | SOX11               |
| rs1558068  | 7    | 30469888          | 0.4325                 | 96.14%             | 0.175550                                               | 0.197700      | 0.00007412                    | 0.00075640                                                            | NM_006092            | intron                | 0                            | Hs.405153          | NOD1                |
| rs1317318  | 15   | 50920355          | 0.0484                 | 97.89%             | 0.483500                                               | 1.000000      | 0.00011370                    | 0.01634000                                                            | NM_004498            | upstream              | 50854                        | Hs.658573          | ONECUT1             |
| rs2023139  | 8    | 118469892         | 0.3040                 | 97.54%             | 0.394400                                               | 0.517300      | 0.00012170                    | 0.00137900                                                            | NM_080651            | upstream              | 132319                       | Hs.492612          | MED30               |
| rs993871   | 7    | 48964483          | 0.3459                 | 93.33%             | 0.278200                                               | 0.462800      | 0.00012380                    | 0.00080400                                                            | NM_198570            | upstream              | 819315                       | Hs.677488          | VWC2                |
| rs903489   | 8    | 108718248         | 0.2113                 | 83.86%             | 0.241700                                               | 1.000000      | 0.00012410                    | 0.00069260                                                            | NM_001146            | upstream              | 138789                       | Hs.369675          | ANGPT1              |
| rs993872   | 7    | 48964240          | 0.3370                 | 94.74%             | 0.275200                                               | 0.708900      | 0.00012460                    | 0.00146600                                                            | NM_198570            | upstream              | 819558                       | Hs.677488          | VWC2                |
| rs724333   | 3    | 55933099          | 0.2273                 | 92.63%             | 0.725600                                               | 0.417200      | 0.00015510                    | 0.00125400                                                            | NM_015576            | intron                | 0                            | Hs.476389          | ERC2                |
| rs1424548  | 7    | 136360300         | 0.3333                 | 91.58%             | 0.889300                                               | 1.000000      | 0.00016930                    | 0.00124800                                                            | NM_001006629         | downstream            | 4761                         | Hs.535891          | CHRM2               |
| rs7921283  | 10   | 58219893          | 0.4415                 | 92.98%             | 0.454500                                               | 0.442900      | 0.00019310                    | 0.00170600                                                            | NM_001005414         | upstream              | 428860                       | ---                | ZWINT               |
| rs2226859  | 18   | 69195178          | 0.4926                 | 94.74%             | 0.182000                                               | 0.048160      | 0.00021100                    | 0.00078680                                                            | NM_138966            | upstream              | 511264                       | Hs.465407          | NETO1               |
| rs10496192 | 2    | 73533374          | 0.1550                 | 95.09%             | 0.643500                                               | 0.465200      | 0.00025300                    | 0.00060690                                                            | NM_015120            | CDS                   | 0                            | Hs.184720          | ALMS1               |
| rs9918728  | 7    | 48896160          | 0.2760                 | 97.89%             | 0.176500                                               | 0.389100      | 0.00025450                    | 0.00347700                                                            | ENST00000381012      | downstream            | 34393                        | ---                | ---                 |
| rs10504455 | 8    | 70633156          | 0.1736                 | 92.98%             | 1.000000                                               | 1.000000      | 0.00027780                    | 0.00059110                                                            | NM_015170            | intron                | 0                            | Hs.409602          | SULF1               |
| rs6544021  | 2    | 22606730          | 0.4923                 | 90.88%             | 0.081510                                               | 0.536200      | 0.00029340                    | 0.00105500                                                            | ENST00000384155      | upstream              | 191350                       | ---                | ---                 |
| rs10485100 | 6    | 92434626          | 0.0343                 | 97.19%             | 1.000000                                               | 1.000000      | 0.00030470                    | 0.99700000                                                            | NM_145333            | upstream              | 1080998                      | Hs.644143          | MAP3K7              |
| rs10504454 | 8    | 70632908          | 0.1741                 | 94.74%             | 1.000000                                               | 1.000000      | 0.00030660                    | 0.00052840                                                            | NM_015170            | intron                | 0                            | Hs.409602          | SULF1               |
| rs957940   | 13   | 53199641          | 0.0572                 | 95.09%             | 0.045920                                               | 0.092540      | 0.00032750                    | 0.00743700                                                            | ENST00000387037      | downstream            | 469133                       | ---                | ---                 |
| rs764637   | 2    | 211349248         | 0.0608                 | 89.47%             | 1.000000                                               | 1.000000      | 0.00033000                    | 0.00454900                                                            | NM_001875            | downstream            | 97174                        | Hs.149252          | CPS1                |
| rs10502259 | 11   | 121089293         | 0.0278                 | 94.74%             | 1.000000                                               | 1.000000      | 0.00033690                    | 0.00101500                                                            | NM_003105            | downstream            | 83696                        | Hs.368592          | SORL1               |
| rs2197713  | 3    | 74252038          | 0.1956                 | 87.02%             | 0.224300                                               | 0.532800      | 0.00034830                    | 0.00302200                                                            | ENST00000334941      | downstream            | 16742                        | ---                | ---                 |
| rs2226024  | 10   | 16238986          | 0.2278                 | 94.74%             | 0.224600                                               | 0.131700      | 0.00035110                    | 0.00110100                                                            | ENST00000364390      | downstream            | 50840                        | ---                | ---                 |
| rs10492603 | 13   | 57769822          | 0.2768                 | 95.09%             | 0.543300                                               | 0.495600      | 0.00038690                    | 0.00403900                                                            | ENST00000365514      | downstream            | 229970                       | ---                | ---                 |
| rs1428445  | 5    | 157928381         | 0.2078                 | 85.26%             | 0.017680                                               | 0.294900      | 0.00039350                    | 0.00966000                                                            | NM_024007            | downstream            | 130316                       | Hs.657753          | EBF1                |
| rs1836216  | 2    | 133682647         | 0.4011                 | 94.04%             | 1.000000                                               | 1.000000      | 0.00042340                    | 0.00402100                                                            | NM_207481            | intron                | 0                            | Hs.537329          | NAP5                |
| rs10508752 | 10   | 30293978          | 0.0186                 | 94.39%             | 0.081630                                               | 1.000000      | 0.00043330                    | 0.01260000                                                            | NM_021738            | upstream              | 330071                       | Hs.499209          | SVIL                |
| rs10520201 | 4    | 172341431         | 0.1852                 | 94.74%             | 0.008550                                               | 0.053700      | 0.00043460                    | 0.00299800                                                            | NM_001034845         | upstream              | 630876                       | Hs.386236          | GALNT17             |
| rs1445754  | 5    | 83611387          | 0.2264                 | 96.84%             | 0.495600                                               | 0.569700      | 0.00043840                    | 0.00033490                                                            | NM_005711            | intron                | 0                            | Hs.482730          | EDIL3               |
| rs4860425  | 4    | 62225552          | 0.2379                 | 94.39%             | 0.063000                                               | 0.352800      | 0.00044280                    | 0.00562600                                                            | NM_015236            | intron                | 0                            | Hs.694758          | LPHN3               |
| rs10509060 | 10   | 58211442          | 0.4364                 | 96.49%             | 1.000000                                               | 0.426600      | 0.00048350                    | 0.01132000                                                            | NM_001005414         | upstream              | 420409                       | ---                | ZWINT               |
| rs10485129 | 6    | 79427902          | 0.1325                 | 94.04%             | 0.103700                                               | 0.641300      | 0.00048920                    | 0.00389100                                                            | NM_001010844         | upstream              | 206006                       | Hs.656212          | IRAK1BP1            |
| rs6427247  | 1    | 168647104         | 0.2706                 | 97.89%             | 0.172600                                               | 1.000000      | 0.00049230                    | 0.00045640                                                            | NM_152281            | upstream              | 120790                       | Hs.183702          | SCYL1BP1            |
| rs10509061 | 10   | 58211893          | 0.4355                 | 97.89%             | 0.715100                                               | 0.751200      | 0.00050350                    | 0.00970500                                                            | NM_001005414         | upstream              | 420851                       | ---                | ZWINT               |
| rs2296041  | 13   | 42884771          | 0.1408                 | 97.19%             | 0.803100                                               | 1.000000      | 0.00051570                    | 0.00240900                                                            | NM_017993            | intron                | 0                            | Hs.128258          | ENOX1               |
| rs3790568  | 1    | 67608648          | 0.1165                 | 97.89%             | 0.775700                                               | 1.000000      | 0.00052690                    | 0.00192400                                                            | NM_001559            | intron                | 0                            | Hs.479347          | IL12RB2             |
| rs10517897 | 4    | 167504234         | 0.0466                 | 86.67%             | 0.086690                                               | 0.162800      | 0.00053400                    | 0.01547000                                                            | NM_016950            | downstream            | 386933                       | Hs.481133          | SPOCK3              |

|            |    |           |        |        |          |          |            |            |                 |            |         |           |          |
|------------|----|-----------|--------|--------|----------|----------|------------|------------|-----------------|------------|---------|-----------|----------|
| rs10495679 | 2  | 18215886  | 0.0888 | 96.84% | 0.706600 | 1.000000 | 0.00053630 | 0.00318200 | NM_020905       | downstream | 383584  | Hs.288880 | RDH14    |
| rs1463075  | 11 | 41588438  | 0.1315 | 94.74% | 0.190600 | 0.273000 | 0.00053890 | 0.00052960 | NM_006595       | upstream   | 1701671 | Hs.435771 | API5     |
| rs10501943 | 11 | 99452209  | 0.1245 | 94.39% | 0.153200 | 0.363300 | 0.00054470 | 0.00025300 | NM_175566       | intron     | 0       | Hs.656783 | CNTN5    |
| rs6500986  | 16 | 7553178   | 0.4259 | 94.74% | 0.456600 | 0.745800 | 0.00054790 | 0.00519100 | NM_018723       | intron     | 0       | Hs.459842 | A2BP1    |
| rs7184426  | 16 | 81379409  | 0.0604 | 95.79% | 0.000105 | 0.000374 | 0.00055010 | 0.00603500 | NM_001257       | upstream   | 70051   | Hs.654386 | CDH13    |
| rs10501855 | 11 | 95882837  | 0.1403 | 97.54% | 0.453500 | 0.083310 | 0.00055030 | 0.00122600 | ENST00000363541 | upstream   | 35334   | ---       | ---      |
| rs10506825 | 12 | 79213548  | 0.1734 | 96.14% | 0.136500 | 0.261800 | 0.00056450 | 0.00087170 | ENST00000378620 | upstream   | 11366   | ---       | ---      |
| rs7537126  | 1  | 171287972 | 0.0591 | 97.89% | 0.059700 | 0.108500 | 0.00056620 | 0.00324100 | NM_005092       | upstream   | 1293    | Hs.248197 | TNFSF18  |
| rs7923214  | 10 | 2283989   | 0.2401 | 97.89% | 0.103400 | 0.477000 | 0.00062170 | 0.00074550 | NM_002627       | upstream   | 815723  | Hs.26010  | PFKP     |
| rs10498405 | 14 | 48126417  | 0.0460 | 87.72% | 0.084860 | 0.152900 | 0.00062680 | 0.03796000 | ENST00000384636 | upstream   | 246132  | ---       | ---      |
| rs2320761  | 13 | 32381294  | 0.2168 | 68.77% | 0.408200 | 0.300500 | 0.00062850 | 0.00075560 | NM_015032       | downstream | 131137  | Hs.699308 | PDS5B    |
| rs727845   | 7  | 67244644  | 0.2281 | 96.14% | 0.863500 | 0.454300 | 0.00066990 | 0.00277100 | ENST00000388515 | upstream   | 43896   | ---       | ---      |
| rs10483431 | 14 | 32751215  | 0.1022 | 96.14% | 0.176900 | 0.203700 | 0.00068010 | 0.00969700 | NM_022123       | intron     | 0       | Hs.659456 | NPAS3    |
| rs6929672  | 6  | 18208225  | 0.4945 | 95.79% | 0.904000 | 0.283600 | 0.00070440 | 0.01092000 | NM_198586       | downstream | 21404   | Hs.348351 | NHLRC1   |
| rs10515652 | 5  | 151541471 | 0.1241 | 97.54% | 0.780600 | 1.000000 | 0.00070680 | 0.00058190 | NM_020167       | downstream | 209832  | Hs.283093 | NMUR2    |
| rs952245   | 18 | 59218939  | 0.3090 | 74.39% | 0.000052 | 0.037760 | 0.00071690 | 0.01239000 | NM_004869       | intron     | 0       | Hs.126550 | VPS4B    |
| rs10495633 | 2  | 14230313  | 0.4675 | 97.19% | 0.040850 | 0.164200 | 0.00071740 | 0.00266100 | ENST00000388013 | downstream | 101884  | ---       | ---      |
| rs2312215  | 2  | 69693329  | 0.3813 | 97.54% | 0.162500 | 1.000000 | 0.00075900 | 0.04932000 | NM_014911       | intron     | 0       | Hs.468878 | AAK1     |
| rs6425196  | 1  | 171248168 | 0.0484 | 97.89% | 0.125200 | 0.200300 | 0.00081880 | 0.00536500 | NM_005092       | downstream | 27555   | Hs.248197 | TNFSF18  |
| rs7095137  | 10 | 84148528  | 0.3309 | 94.39% | 0.492000 | 1.000000 | 0.00082750 | 0.01345000 | NM_001010848    | intron     | 0       | Hs.125119 | NRG3     |
| rs4858389  | 3  | 22166090  | 0.2809 | 93.68% | 0.649300 | 0.397000 | 0.00085270 | 0.00258700 | NM_024697       | upstream   | 398270  | Hs.21026  | ZNF385D  |
| rs7838730  | 8  | 70637862  | 0.1367 | 93.68% | 0.297700 | 0.297000 | 0.00086580 | 0.00557000 | NM_015170       | intron     | 0       | Hs.409602 | SULF1    |
| rs1476742  | 5  | 81756346  | 0.1218 | 95.09% | 0.567700 | 0.624300 | 0.00086870 | 0.00814600 | NM_001039779    | downstream | 38255   | ---       | FLJ41309 |
| rs720763   | 16 | 9473575   | 0.2313 | 94.04% | 0.605900 | 0.803600 | 0.00090170 | 0.01269000 | ENST00000363598 | downstream | 92173   | ---       | ---      |
| rs1953901  | 14 | 48134332  | 0.0545 | 93.33% | 0.553700 | 1.000000 | 0.00091490 | 0.01018000 | ENST00000384636 | upstream   | 254047  | ---       | ---      |
| rs1596839  | 11 | 25138024  | 0.1540 | 78.60% | 0.000009 | 0.001251 | 0.00092450 | 0.02686000 | NM_001009909    | downstream | 81244   | Hs.144138 | LUZP2    |
| rs8092610  | 18 | 64612870  | 0.0215 | 97.89% | 0.113800 | 1.000000 | 0.00093540 | 0.00961000 | NM_024781       | upstream   | 3480    | Hs.280781 | CCDC102B |
| rs10515167 | 5  | 73616240  | 0.3346 | 91.23% | 0.166600 | 0.195800 | 0.00093570 | 0.00082770 | ENST00000388185 | upstream   | 33327   | ---       | ---      |
| rs10507834 | 13 | 75274475  | 0.0287 | 97.89% | 1.000000 | 1.000000 | 0.00094960 | 0.99740000 | NM_005358       | intron     | 0       | Hs.207631 | LMO7     |
| rs1812535  | 8  | 62021574  | 0.0941 | 95.09% | 1.000000 | 1.000000 | 0.00095670 | 0.00108900 | NM_017780       | downstream | 79557   | Hs.20395  | CHD7     |
| rs10499097 | 6  | 120580712 | 0.3297 | 97.89% | 0.417600 | 0.853000 | 0.00098340 | 0.00193700 | NM_005907       | upstream   | 868087  | Hs.102788 | MAN1A1   |
| rs2505593  | 10 | 36903981  | 0.4980 | 88.07% | 0.000083 | 0.007186 | 0.00099270 | 0.03202000 | ENST00000279434 | upstream   | 50813   | ---       | ---      |
| rs10508275 | 10 | 4105624   | 0.0609 | 95.09% | 1.000000 | 1.000000 | 0.00103600 | 0.01140000 | NM_001300       | upstream   | 288157  | Hs.4055   | KLF6     |
| rs1834619  | 2  | 17764966  | 0.3409 | 92.63% | 0.683500 | 0.711500 | 0.00104700 | 0.00327200 | NM_024624       | intron     | 0       | Hs.526728 | SMC6     |
| rs1323114  | 13 | 52408115  | 0.3436 | 96.49% | 0.005066 | 0.017950 | 0.00104900 | 0.00515700 | NM_032949       | upstream   | 87543   | Hs.19492  | PCDH8    |
| rs10496888 | 2  | 142087259 | 0.0311 | 90.18% | 0.000000 | 0.000000 | 0.00105200 | 0.99810000 | NM_018557       | intron     | 0       | Hs.656461 | LRP1B    |
| rs7580890  | 2  | 143039062 | 0.0771 | 93.33% | 0.658600 | 1.000000 | 0.00107400 | 0.00313600 | NM_001032998    | upstream   | 312603  | Hs.470126 | KYNU     |
| rs256817   | 5  | 123644632 | 0.1486 | 90.88% | 0.468500 | 0.697600 | 0.00108800 | 0.02230000 | NM_020747       | downstream | 355877  | Hs.266616 | ZNF608   |
| rs6744763  | 2  | 79078334  | 0.0447 | 90.18% | 0.080800 | 0.143800 | 0.00112000 | 0.00973700 | NM_198448       | upstream   | 28000   | Hs.447084 | REG3G    |
| rs578813   | 11 | 41087368  | 0.0704 | 94.74% | 0.628100 | 0.662700 | 0.00112300 | 0.00890700 | ENST00000386948 | downstream | 13677   | ---       | ---      |
| rs10489686 | 1  | 191250682 | 0.0431 | 93.68% | 0.075490 | 0.134200 | 0.00113200 | 0.01115000 | NM_015984       | downstream | 830     | Hs.591458 | UCHL5    |
| rs2701105  | 12 | 113182071 | 0.3459 | 97.89% | 0.145700 | 0.280600 | 0.00114700 | 0.00084950 | NM_181486       | downstream | 94048   | Hs.381715 | TBX5     |
| rs841576   | 1  | 43213063  | 0.4721 | 75.44% | 0.002582 | 0.224200 | 0.00114700 | 0.00151700 | NM_006516       | upstream   | 15975   | Hs.473721 | SLC2A1   |
| rs1892415  | 10 | 84172829  | 0.3582 | 96.49% | 0.793900 | 0.286500 | 0.00115200 | 0.01318000 | NM_001010848    | intron     | 0       | Hs.125119 | NRG3     |
| rs7357341  | 7  | 136341993 | 0.2847 | 96.14% | 0.377200 | 0.735500 | 0.00116200 | 0.00364700 | NM_001006629    | intron     | 0       | Hs.535891 | CHRM2    |
| rs10495673 | 2  | 18004709  | 0.2870 | 97.19% | 0.187300 | 0.063440 | 0.00117600 | 0.00059540 | NM_002252       | downstream | 27000   | Hs.414489 | KCNS3    |
| rs10515380 | 5  | 107187134 | 0.1498 | 97.19% | 0.233100 | 0.210500 | 0.00119500 | 0.00076260 | NM_022824       | downstream | 38186   | Hs.657225 | FBXL17   |
| rs10508749 | 10 | 30294794  | 0.0168 | 94.04% | 1.000000 | 1.000000 | 0.00119900 | 0.00983900 | NM_021738       | upstream   | 330887  | Hs.499209 | SVIL     |
| rs7073175  | 10 | 84148403  | 0.3698 | 84.91% | 0.890200 | 0.457400 | 0.00122000 | 0.01927000 | NM_001010848    | intron     | 0       | Hs.125119 | NRG3     |
| rs2031175  | 9  | 639750    | 0.3193 | 87.37% | 0.189600 | 0.316800 | 0.00122800 | 0.00439500 | NM_015158       | intron     | 0       | Hs.306764 | ANKRD15  |
| rs1353548  | 11 | 91409927  | 0.0256 | 95.79% | 0.157100 | 1.000000 | 0.00123300 | 0.00828300 | NM_012124       | upstream   | 1814100 | Hs.22857  | CHORDC1  |
| rs2373792  | 2  | 40203775  | 0.4257 | 87.37% | 0.697200 | 0.636400 | 0.00123300 | 0.00736900 | NM_021097       | intron     | 0       | Hs.468274 | SLC8A1   |
| rs2970925  | 2  | 88162851  | 0.1372 | 97.19% | 0.616100 | 0.393400 | 0.00123400 | 0.00684100 | NM_198274       | intron     | 0       | Hs.516176 | SMYD1    |
| rs940382   | 7  | 142424616 | 0.1047 | 90.53% | 0.747200 | 1.000000 | 0.00127600 | 0.00413200 | NM_001001658    | downstream | 8793    | Hs.553594 | OR9A2    |

|            |    |           |        |        |          |          |            |            |                 |            |         |           |          |
|------------|----|-----------|--------|--------|----------|----------|------------|------------|-----------------|------------|---------|-----------|----------|
| rs1364593  | 3  | 190712898 | 0.3190 | 97.89% | 0.890500 | 0.262300 | 0.00128900 | 0.00126200 | NM_198485       | downstream | 188934  | Hs.338851 | FAM79B   |
| rs3101644  | 15 | 25441728  | 0.3529 | 89.47% | 0.013310 | 0.054440 | 0.00129900 | 0.00445800 | NM_033223       | intron     | 0       | Hs.569475 | GABRG3   |
| rs2861215  | 2  | 77900300  | 0.3429 | 85.96% | 0.001744 | 0.021210 | 0.00130500 | 0.01222000 | ENST00000386159 | downstream | 151129  | ---       | ---      |
| rs512533   | 4  | 177886641 | 0.0188 | 83.86% | 0.001645 | 1.000000 | 0.00130900 | 0.04114000 | NM_005429       | intron     | 0       | Hs.435215 | VEGFC    |
| rs10490678 | 2  | 36351175  | 0.1447 | 95.79% | 0.323000 | 0.119200 | 0.00131700 | 0.01605000 | NM_016441       | upstream   | 85398   | Hs.699247 | CRIM1    |
| rs1267622  | 7  | 140174786 | 0.2228 | 96.84% | 0.485700 | 0.847700 | 0.00132100 | 0.01644000 | NM_004333       | intron     | 0       | Hs.550061 | BRAF     |
| rs859365   | 1  | 173763324 | 0.0756 | 90.53% | 0.164000 | 1.000000 | 0.00136400 | 0.00159100 | ENST00000367674 | intron     | 0       | ---       | ---      |
| rs7974710  | 12 | 108158980 | 0.1709 | 82.11% | 1.000000 | 1.000000 | 0.00137300 | 0.00255500 | NM_001093       | intron     | 0       | Hs.234898 | ACACB    |
| rs1385982  | 8  | 50930576  | 0.0948 | 81.40% | 0.702300 | 0.420600 | 0.00140200 | 0.00297200 | NM_018967       | upstream   | 538750  | Hs.584914 | SNTG1    |
| rs10516104 | 5  | 173082405 | 0.0906 | 92.98% | 0.011710 | 0.449500 | 0.00140600 | 0.05148000 | NM_138369       | upstream   | 106143  | Hs.425091 | FAM44B   |
| rs10487731 | 7  | 31663909  | 0.0114 | 92.28% | 1.000000 | 1.000000 | 0.00141900 | 0.99830000 | NM_194300       | downstream | 4081    | Hs.224269 | CCDC129  |
| rs291875   | 5  | 102866317 | 0.1541 | 97.89% | 0.819300 | 1.000000 | 0.00145200 | 0.00463300 | NM_031438       | downstream | 46138   | Hs.434289 | NUDT12   |
| rs327866   | 5  | 125246105 | 0.4946 | 97.54% | 0.811100 | 0.648500 | 0.00148100 | 0.00125800 | NM_023927       | upstream   | 540895  | Hs.363558 | GRAMD3   |
| rs10510638 | 3  | 30751270  | 0.0191 | 82.46% | 0.075050 | 1.000000 | 0.00148800 | 0.03647000 | NM_207359       | intron     | 0       | Hs.657052 | GADL1    |
| rs10492610 | 13 | 31226328  | 0.2365 | 91.23% | 0.124300 | 0.465500 | 0.00149300 | 0.01374000 | NM_130806       | intron     | 0       | Hs.680763 | RFXFP2   |
| rs9320162  | 6  | 106958006 | 0.2790 | 96.84% | 0.052390 | 0.038730 | 0.00149500 | 0.00256100 | NM_004849       | upstream   | 77647   | Hs.486063 | ATG5     |
| rs10508240 | 10 | 2719953   | 0.2992 | 89.12% | 0.133600 | 0.308000 | 0.00151000 | 0.01022000 | NM_002627       | upstream   | 379759  | Hs.26010  | PFKP     |
| rs725463   | 15 | 57930371  | 0.2892 | 94.04% | 0.298600 | 0.401500 | 0.00153000 | 0.01172000 | NM_012182       | upstream   | 154056  | Hs.160375 | FOXB1    |
| rs10504861 | 8  | 89617048  | 0.1444 | 97.19% | 0.139400 | 0.303900 | 0.00154800 | 0.01111000 | NM_003821       | upstream   | 1222125 | Hs.103755 | RIPK2    |
| rs2117784  | 3  | 6320015   | 0.2583 | 84.91% | 0.063390 | 0.058340 | 0.00156300 | 0.00516000 | NM_181874       | upstream   | 558061  | Hs.660131 | GRM7     |
| rs2376310  | 9  | 2111124   | 0.1861 | 93.33% | 0.689300 | 0.760800 | 0.00156700 | 0.00301000 | NM_003070       | intron     | 0       | Hs.298990 | SMARCA2  |
| rs10499143 | 6  | 129258873 | 0.0205 | 94.04% | 1.000000 | 1.000000 | 0.00157200 | 0.00053260 | NM_000426       | intron     | 0       | Hs.200841 | LAMA2    |
| rs229054   | 21 | 27238687  | 0.1900 | 97.89% | 0.559000 | 0.674200 | 0.00157200 | 0.01329000 | NM_007038       | intron     | 0       | Hs.58324  | ADAMTS5  |
| rs9290870  | 3  | 189339096 | 0.1863 | 95.09% | 0.840900 | 1.000000 | 0.00160500 | 0.00097860 | NM_207488       | upstream   | 39929   | ---       | FLJ42393 |
| rs348561   | 5  | 40348149  | 0.2105 | 86.67% | 0.022260 | 0.158200 | 0.00161100 | 0.00353100 | ENST00000362491 | downstream | 42571   | ---       | ---      |
| rs7118840  | 11 | 123605226 | 0.4200 | 96.49% | 0.901900 | 0.519700 | 0.00161200 | 0.00086510 | NM_001007249    | downstream | 3651    | Hs.381319 | OR8G2    |
| rs10510244 | 3  | 3011671   | 0.0117 | 90.18% | 1.000000 | 1.000000 | 0.00163100 | 0.99810000 | NM_175613       | intron     | 0       | Hs.298705 | CNTN4    |
| rs1323113  | 13 | 52407476  | 0.1942 | 97.54% | 0.085630 | 0.039850 | 0.00163800 | 0.00225700 | NM_032949       | upstream   | 86904   | Hs.19492  | PCDH8    |
| rs1496103  | 1  | 185526018 | 0.3000 | 75.44% | 0.005681 | 0.205100 | 0.00164100 | 0.00147800 | NM_024420       | downstream | 301282  | Hs.497200 | PLA2G4A  |
| rs4077557  | 2  | 22490359  | 0.1630 | 96.84% | 0.045990 | 0.735200 | 0.00166300 | 0.00530000 | ENST00000384155 | upstream   | 74979   | ---       | ---      |
| rs4881205  | 10 | 3743307   | 0.5000 | 95.44% | 0.146800 | 0.444400 | 0.00169800 | 0.00567300 | NM_001300       | downstream | 64881   | Hs.4055   | KLF6     |
| rs1031159  | 3  | 125418519 | 0.0118 | 89.47% | 0.000174 | 1.000000 | 0.00171000 | 0.99820000 | NM_003947       | intron     | 0       | Hs.8004   | KALRN    |
| rs1994497  | 7  | 142527049 | 0.1063 | 94.04% | 0.749500 | 0.746100 | 0.00172100 | 0.00740100 | NM_002652       | upstream   | 12239   | Hs.99949  | PIP      |
| rs9306902  | 2  | 16913600  | 0.4074 | 94.74% | 0.449600 | 0.743800 | 0.00172600 | 0.00978800 | ENST00000386331 | downstream | 13844   | ---       | ---      |
| rs2346593  | 4  | 63606400  | 0.0849 | 95.09% | 0.420300 | 0.431600 | 0.00172800 | 0.00522000 | NM_001010874    | downstream | 1221985 | Hs.227752 | SRD5A2L2 |
| rs9309473  | 2  | 73597490  | 0.2097 | 93.68% | 0.063130 | 0.010670 | 0.00174600 | 0.00275300 | NM_015120       | intron     | 0       | Hs.184720 | ALMS1    |
| rs1578243  | 1  | 191503664 | 0.3759 | 96.14% | 0.700800 | 0.645900 | 0.00175100 | 0.00281400 | NM_024529       | downstream | 15985   | Hs.576497 | CDC73    |
| rs3098224  | 8  | 104515872 | 0.1951 | 92.63% | 0.695900 | 1.000000 | 0.00175700 | 0.00056130 | NM_015420       | intron     | 0       | Hs.532265 | WDSOF1   |
| rs4355015  | 18 | 36966697  | 0.0919 | 95.44% | 1.000000 | 1.000000 | 0.00176100 | 0.01470000 | NM_002647       | upstream   | 822500  | Hs.464971 | PIK3C3   |
| rs1854226  | 13 | 97036243  | 0.1942 | 97.54% | 0.338500 | 0.302400 | 0.00176200 | 0.01091000 | NM_021033       | downstream | 118000  | Hs.508480 | RAP2A    |
| rs10483927 | 14 | 79147362  | 0.0324 | 97.54% | 0.247400 | 1.000000 | 0.00177500 | 0.00771100 | NM_138970       | intron     | 0       | Hs.368307 | NRXN3    |
| rs7896207  | 10 | 19111041  | 0.1111 | 97.89% | 0.759000 | 0.604300 | 0.00178400 | 0.00545300 | NM_178815       | downstream | 104095  | Hs.25362  | ARL5B    |
| rs10492329 | 12 | 113032591 | 0.2556 | 94.74% | 0.633900 | 0.652600 | 0.00178600 | 0.00544900 | NM_016196       | upstream   | 144097  | Hs.7482   | RBM19    |
| rs10505302 | 8  | 118479807 | 0.1960 | 97.54% | 0.125200 | 0.210500 | 0.00179900 | 0.00729900 | NM_080651       | upstream   | 122404  | Hs.492612 | MED30    |
| rs10492354 | 12 | 31248369  | 0.1175 | 94.04% | 1.000000 | 1.000000 | 0.00180500 | 0.00838000 | NM_021238       | downstream | 76427   | Hs.505154 | FAM60A   |
| rs10495744 | 2  | 23432076  | 0.3403 | 92.28% | 0.783700 | 0.855200 | 0.00181900 | 0.00203800 | ENST00000288548 | upstream   | 29999   | ---       | ---      |
| rs422467   | 8  | 37251453  | 0.4700 | 81.75% | 0.292700 | 0.192600 | 0.00181900 | 0.02266000 | NM_021631       | downstream | 385467  | Hs.651853 | FKSG2    |
| rs10484314 | 6  | 5593086   | 0.4277 | 87.37% | 0.028350 | 0.235300 | 0.00182600 | 0.01746000 | NM_006567       | intron     | 0       | Hs.484547 | FARS2    |
| rs925806   | 2  | 183704326 | 0.2978 | 95.44% | 0.013180 | 0.239900 | 0.00182700 | 0.00803300 | NM_001008544    | intron     | 0       | ---       | NUP35    |
| rs10491374 | 5  | 36703336  | 0.4234 | 91.58% | 0.022260 | 0.214600 | 0.00182800 | 0.00683100 | NM_004172       | intron     | 0       | Hs.481918 | SLC1A3   |
| rs10504994 | 8  | 100694363 | 0.2892 | 94.04% | 0.298600 | 0.067830 | 0.00185700 | 0.01876000 | NM_017890       | intron     | 0       | Hs.191540 | VPS13B   |
| rs763970   | 2  | 138352603 | 0.2500 | 95.44% | 0.107000 | 0.037480 | 0.00186600 | 0.00039980 | NM_001024075    | upstream   | 85675   | Hs.42151  | HNMT     |
| rs959036   | 3  | 95660973  | 0.4347 | 94.04% | 0.387300 | 0.873200 | 0.00187200 | 0.03847000 | NM_022072       | downstream | 332653  | Hs.656338 | NSUN3    |
| rs692419   | 5  | 18024601  | 0.4658 | 97.54% | 0.717800 | 0.878100 | 0.00191000 | 0.00393900 | ENST00000332101 | upstream   | 336205  | ---       | ---      |

|            |    |           |        |        |          |          |            |            |                 |            |         |           |           |
|------------|----|-----------|--------|--------|----------|----------|------------|------------|-----------------|------------|---------|-----------|-----------|
| rs569724   | 11 | 29979751  | 0.1679 | 97.19% | 1.000000 | 1.000000 | 0.00191400 | 0.00578300 | NM_002233       | downstream | 8590    | Hs.592002 | KCNA4     |
| rs763829   | 2  | 125916736 | 0.1556 | 94.74% | 0.107000 | 0.458200 | 0.00193400 | 0.00747000 | NM_016815       | upstream   | 1247808 | Hs.59138  | GYPC      |
| rs13183130 | 5  | 3662953   | 0.0278 | 94.74% | 1.000000 | 1.000000 | 0.00193600 | 0.99720000 | NM_024337       | downstream | 8436    | Hs.424156 | IRX1      |
| rs4488182  | 11 | 41032137  | 0.2007 | 97.89% | 0.136900 | 0.220900 | 0.00194200 | 0.00102200 | ENST00000386948 | downstream | 68908   | ---       | ---       |
| rs7792319  | 7  | 19133537  | 0.1679 | 97.19% | 0.082880 | 0.039030 | 0.00194900 | 0.02219000 | NM_000474       | upstream   | 9717    | Hs.66744  | TWIST1    |
| rs950519   | 20 | 22410490  | 0.0387 | 95.09% | 0.331500 | 0.431600 | 0.00195500 | 0.03015000 | NM_153675       | downstream | 99333   | Hs.155651 | FOXA2     |
| rs173851   | 5  | 86041120  | 0.0430 | 97.89% | 1.000000 | 1.000000 | 0.00195800 | 0.00345400 | NM_001039781    | downstream | 340399  | ---       | LOC645261 |
| rs10484015 | 14 | 89233314  | 0.3209 | 89.12% | 0.312700 | 0.617400 | 0.00196800 | 0.00344400 | ENST00000363442 | upstream   | 15294   | ---       | ---       |
| rs10497961 | 2  | 212751316 | 0.0295 | 95.09% | 0.017240 | 0.038370 | 0.00197000 | 0.99740000 | NM_001042599    | intron     | 0       | Hs.390729 | ERBB4     |
| rs10506330 | 12 | 53377548  | 0.0295 | 95.09% | 1.000000 | 1.000000 | 0.00197000 | 0.99730000 | NM_053283       | upstream   | 49135   | Hs.350570 | DCD       |
| rs285406   | 8  | 87094129  | 0.0296 | 94.74% | 0.204500 | 0.298600 | 0.00197100 | 0.99720000 | NM_033126       | downstream | 35678   | Hs.680136 | PSKH2     |
| rs7210646  | 17 | 53194185  | 0.0277 | 95.09% | 1.000000 | 1.000000 | 0.00197100 | 0.99700000 | ENST00000299415 | upstream   | 16553   | ---       | ---       |
| rs993873   | 7  | 48964209  | 0.4882 | 89.12% | 0.260500 | 0.642300 | 0.00198600 | 0.00658500 | NM_198570       | upstream   | 819589  | Hs.677488 | VWC2      |
| rs2932887  | 10 | 66330005  | 0.0611 | 94.74% | 0.255300 | 1.000000 | 0.00201000 | 0.00302300 | NM_013266       | downstream | 1019720 | Hs.660362 | CTNNA3    |
| rs993870   | 7  | 48964571  | 0.4851 | 94.39% | 0.902900 | 0.763600 | 0.00202900 | 0.00569000 | NM_198570       | upstream   | 819227  | Hs.677488 | VWC2      |
| rs1451424  | 4  | 180297133 | 0.4777 | 94.39% | 0.066920 | 1.000000 | 0.00204100 | 0.01875000 | ENST00000364857 | downstream | 732175  | ---       | ---       |
| rs733207   | 6  | 157835675 | 0.1956 | 95.09% | 0.442600 | 0.674200 | 0.00205300 | 0.00318700 | NM_153746       | intron     | 0       | Hs.187459 | ZDHC14    |
| rs2151933  | 10 | 99435896  | 0.0675 | 88.42% | 0.089560 | 0.024560 | 0.00208600 | 0.00573400 | NM_021732       | intron     | 0       | Hs.23918  | AVP11     |
| rs10488948 | 4  | 10145642  | 0.3007 | 95.09% | 0.195100 | 0.173500 | 0.00216300 | 0.01899000 | NM_052964       | intron     | 0       | Hs.678910 | MIST      |
| rs952841   | 5  | 86135888  | 0.1882 | 97.89% | 0.845900 | 0.830500 | 0.00219100 | 0.00885300 | NM_001039781    | downstream | 245631  | ---       | LOC645261 |
| rs2098067  | 4  | 11212565  | 0.4760 | 95.09% | 0.543300 | 1.000000 | 0.00219800 | 0.00535800 | NM_005114       | upstream   | 172078  | Hs.507348 | HS3ST1    |
| rs2001776  | 9  | 2110825   | 0.1739 | 96.84% | 0.527900 | 0.748800 | 0.00222100 | 0.00435000 | NM_003070       | intron     | 0       | Hs.298990 | SMARCA2   |
| rs10521030 | 16 | 50046243  | 0.0371 | 89.82% | 0.038880 | 0.044110 | 0.00222300 | 0.00236300 | NM_002968       | upstream   | 303590  | Hs.135787 | SALL1     |
| rs725779   | 12 | 1999243   | 0.2008 | 92.63% | 0.052760 | 0.397200 | 0.00222600 | 0.00727500 | NM_152640       | upstream   | 15305   | Hs.130934 | DCP1B     |
| rs845105   | 10 | 125171849 | 0.0450 | 97.54% | 0.431400 | 0.529800 | 0.00223400 | 0.01966000 | NM_153442       | upstream   | 244012  | Hs.12751  | GPR26     |
| rs10507085 | 12 | 96310831  | 0.0463 | 94.74% | 0.013430 | 1.000000 | 0.00223500 | 0.06997000 | ENST00000384854 | upstream   | 170890  | ---       | ---       |
| rs10513351 | 9  | 121566595 | 0.3646 | 84.21% | 0.210100 | 0.089220 | 0.00225800 | 0.01111000 | NM_014618       | upstream   | 395073  | Hs.532316 | DBC1      |
| rs963730   | 2  | 39070277  | 0.1412 | 91.93% | 0.317770 | 0.604600 | 0.00227900 | 0.00462300 | NM_005633       | intron     | 0       | Hs.654397 | SOS1      |
| rs699549   | 2  | 4683138   | 0.0685 | 94.74% | 0.355200 | 0.270200 | 0.00231300 | 0.00034860 | ENST00000387792 | downstream | 169328  | ---       | ---       |
| rs612815   | 3  | 195075371 | 0.2870 | 97.19% | 0.768900 | 0.614500 | 0.00231500 | 0.01867000 | NM_005524       | upstream   | 261257  | Hs.250666 | HES1      |
| rs10504993 | 8  | 100678473 | 0.2782 | 87.02% | 0.038880 | 0.006530 | 0.00231700 | 0.01239000 | NM_017890       | intron     | 0       | Hs.191540 | VPS13B    |
| rs243030   | 2  | 60460075  | 0.2578 | 90.53% | 0.005293 | 0.015540 | 0.00232100 | 0.01001000 | ENST00000363937 | upstream   | 5169    | ---       | ---       |
| rs2346645  | 4  | 63565257  | 0.0921 | 93.33% | 0.472900 | 0.505200 | 0.00232700 | 0.00959600 | NM_001010874    | downstream | 1263128 | Hs.227752 | SRD5A2L2  |
| rs254755   | 5  | 86034265  | 0.0394 | 97.89% | 1.000000 | 1.000000 | 0.00232700 | 0.00569200 | NM_001039781    | downstream | 347254  | ---       | LOC645261 |
| rs953944   | 7  | 77846067  | 0.1945 | 96.49% | 0.702000 | 1.000000 | 0.00233400 | 0.00692300 | NM_012301       | intron     | 0       | Hs.654788 | MAGI2     |
| rs496112   | 6  | 12731836  | 0.3750 | 92.63% | 0.693400 | 0.395100 | 0.00235900 | 0.00148500 | NM_030948       | upstream   | 95127   | Hs.436996 | PHACTR1   |
| rs2199297  | 8  | 113106899 | 0.1337 | 90.53% | 0.001685 | 0.001331 | 0.00236700 | 0.03284000 | ENST00000364160 | downstream | 123197  | ---       | ---       |
| rs1923402  | 10 | 4150469   | 0.0665 | 97.54% | 1.000000 | 1.000000 | 0.00240200 | 0.03424000 | NM_001300       | upstream   | 333002  | Hs.4055   | KLF6      |
| rs10487391 | 7  | 117652264 | 0.1643 | 73.68% | 0.079110 | 0.217900 | 0.00240900 | 0.00725100 | NM_019644       | 5UTR       | 0       | Hs.657737 | ANKRD7    |
| rs4667235  | 2  | 189228047 | 0.2043 | 82.46% | 0.002037 | 0.001806 | 0.00241000 | 0.00317200 | NM_016315       | downstream | 60016   | Hs.470887 | GULP1     |
| rs996893   | 7  | 77844100  | 0.1964 | 96.49% | 0.702000 | 1.000000 | 0.00241600 | 0.00611700 | NM_012301       | intron     | 0       | Hs.654788 | MAGI2     |
| rs3901494  | 11 | 123740882 | 0.4417 | 93.33% | 1.000000 | 0.634600 | 0.00242300 | 0.00128700 | ENST00000359473 | CDS        | 0       | ---       | ---       |
| rs1415472  | 9  | 16631492  | 0.0701 | 95.09% | 0.378100 | 1.000000 | 0.00243600 | 0.00093690 | NM_017637       | intron     | 0       | Hs.656581 | BNC2      |
| rs6736638  | 2  | 64806834  | 0.0686 | 97.19% | 0.029080 | 1.000000 | 0.00244700 | 0.01213000 | NM_014755       | upstream   | 72284   | Hs.693696 | SERTAD2   |
| rs7567009  | 2  | 143039231 | 0.0837 | 90.18% | 0.398600 | 0.423000 | 0.00245900 | 0.00395900 | NM_001032998    | upstream   | 312434  | Hs.470126 | KYNU      |
| rs10495725 | 2  | 22076169  | 0.0867 | 95.09% | 0.704100 | 1.000000 | 0.00246100 | 0.00958000 | ENST00000383859 | downstream | 76504   | ---       | ---       |
| rs10501940 | 11 | 99440078  | 0.1143 | 90.53% | 0.348100 | 0.289300 | 0.00247500 | 0.00085040 | NM_175566       | intron     | 0       | Hs.656783 | CNTN5     |
| rs1417694  | 6  | 63800297  | 0.3809 | 97.19% | 0.160500 | 0.066180 | 0.00251600 | 0.00144200 | ENST00000370659 | upstream   | 179013  | ---       | ---       |
| rs10492839 | 16 | 6685600   | 0.0525 | 96.84% | 0.539700 | 1.000000 | 0.00251900 | 0.03456000 | NM_001013705    | downstream | 315917  | ---       | LOC440337 |
| rs10490208 | 2  | 40307298  | 0.4904 | 91.58% | 0.215400 | 0.876800 | 0.00253400 | 0.01208000 | NM_021097       | intron     | 0       | Hs.468274 | SLC8A1    |
| rs851426   | 2  | 19356456  | 0.2158 | 97.54% | 1.000000 | 0.693100 | 0.00254400 | 0.01739000 | NM_145260       | downstream | 58271   | Hs.123933 | OSR1      |
| rs10488388 | 7  | 130552209 | 0.0773 | 97.54% | 1.000000 | 1.000000 | 0.00255700 | 0.00378900 | NM_013255       | upstream   | 110966  | Hs.702060 | MKLN1     |
| rs1893290  | 18 | 19696619  | 0.2227 | 80.35% | 0.000000 | 0.000000 | 0.00256200 | 0.06267000 | NM_198129       | intron     | 0       | Hs.436367 | LAMA3     |
| rs609493   | 11 | 93708735  | 0.3657 | 94.04% | 0.187800 | 0.279400 | 0.00259000 | 0.01850000 | NM_016540       | downstream | 41396   | Hs.272385 | GPR83     |

|            |    |           |        |        |          |          |            |            |                 |            |         |           |          |
|------------|----|-----------|--------|--------|----------|----------|------------|------------|-----------------|------------|---------|-----------|----------|
| rs6549162  | 3  | 69117389  | 0.1596 | 91.23% | 0.252200 | 1.000000 | 0.00266600 | 0.02518000 | NM_173654       | intron     | 0       | Hs.518059 | C3orf64  |
| rs10508567 | 10 | 19061393  | 0.1093 | 97.89% | 0.755200 | 0.604300 | 0.00269900 | 0.00820200 | NM_178815       | downstream | 54447   | Hs.25362  | ARL5B    |
| rs1591817  | 10 | 109128388 | 0.3549 | 78.60% | 0.002059 | 0.033490 | 0.00269900 | 0.01367000 | NM_001013031    | upstream   | 214114  | Hs.591915 | SORCS1   |
| rs6733858  | 2  | 190172981 | 0.3727 | 95.09% | 0.698900 | 0.643800 | 0.00270200 | 0.00548800 | NM_014585       | upstream   | 19123   | Hs.643005 | SLC40A1  |
| rs980286   | 2  | 141447731 | 0.2126 | 86.67% | 0.001869 | 0.001620 | 0.00271400 | 0.01221000 | NM_018557       | intron     | 0       | Hs.656461 | LRP1B    |
| rs34460    | 12 | 95708104  | 0.1615 | 91.23% | 0.645100 | 0.295200 | 0.00275700 | 0.03387000 | NM_198520       | downstream | 24925   | Hs.436197 | C12orf63 |
| rs10495743 | 2  | 23431463  | 0.3504 | 85.61% | 0.092170 | 0.039430 | 0.00276100 | 0.01252000 | ENST00000288548 | upstream   | 30612   | ---       | ---      |
| rs10513380 | 3  | 152126063 | 0.4240 | 87.72% | 0.000752 | 0.016480 | 0.00276600 | 0.01134000 | NM_052995       | downstream | 577     | Hs.380222 | CLRN1    |
| rs10491242 | 5  | 81776991  | 0.0498 | 95.09% | 0.494000 | 0.121800 | 0.00277400 | 0.01453000 | NM_001039779    | downstream | 58900   | ---       | FLJ41309 |
| rs10510779 | 3  | 56086063  | 0.1125 | 95.09% | 0.758200 | 1.000000 | 0.00278300 | 0.01135000 | NM_015576       | intron     | 0       | Hs.476389 | ERC2     |
| rs956380   | 3  | 19346049  | 0.0556 | 94.74% | 0.573700 | 1.000000 | 0.00279500 | 0.09881000 | NM_144633       | intron     | 0       | Hs.475656 | KCNH8    |
| rs1395612  | 4  | 189670284 | 0.2754 | 96.84% | 0.651500 | 0.673300 | 0.00281200 | 0.00619800 | NM_178556       | downstream | 364641  | Hs.348618 | TRIML1   |
| rs1531209  | 8  | 95306201  | 0.3387 | 97.89% | 0.182800 | 0.589000 | 0.00283300 | 0.00225300 | NM_004063       | upstream   | 16215   | Hs.591853 | CDH17    |
| rs7649544  | 3  | 353069    | 0.0699 | 97.89% | 0.377500 | 1.000000 | 0.00283700 | 0.00206000 | NM_006614       | intron     | 0       | Hs.148909 | CHL1     |
| rs2036516  | 9  | 97170923  | 0.3939 | 81.05% | 0.000909 | 0.067860 | 0.00285200 | 0.03000000 | NM_000136       | upstream   | 51111   | Hs.494529 | FANCC    |
| rs236833   | 2  | 205517999 | 0.4748 | 90.53% | 0.169200 | 0.754600 | 0.00287800 | 0.00398700 | NM_057177       | intron     | 0       | Hs.657382 | PCARD3B  |
| rs10497682 | 2  | 189391807 | 0.0933 | 94.04% | 0.712200 | 1.000000 | 0.00288900 | 0.01474000 | NM_052952       | upstream   | 28731   | Hs.470892 | DIRC1    |
| rs1835705  | 4  | 133133982 | 0.0504 | 94.04% | 1.000000 | 1.000000 | 0.00290500 | 0.00168000 | NM_020815       | upstream   | 1155938 | Hs.192859 | PCDH10   |
| rs994705   | 4  | 42658294  | 0.1306 | 94.04% | 0.098710 | 0.169500 | 0.00291200 | 0.00552500 | NM_006095       | upstream   | 304427  | Hs.435052 | ATP8A1   |
| rs6990997  | 8  | 106881703 | 0.0794 | 81.75% | 0.008105 | 0.014930 | 0.00291400 | 0.05485000 | NM_012082       | intron     | 0       | Hs.431009 | ZFPF2    |
| rs1592418  | 7  | 34877868  | 0.3098 | 96.84% | 0.122500 | 0.331000 | 0.00292600 | 0.00182300 | NM_207173       | intron     | 0       | Hs.652373 | NPSR1    |
| rs1864747  | 14 | 88044620  | 0.1798 | 80.00% | 0.001260 | 0.007693 | 0.00293200 | 0.01904000 | NM_007039       | intron     | 0       | Hs.437040 | PTPN21   |
| rs3754741  | 2  | 173761465 | 0.2658 | 94.39% | 0.350000 | 0.379400 | 0.00293700 | 0.01628000 | NM_133646       | intron     | 0       | Hs.444451 | ZAK      |
| rs726789   | 19 | 14604003  | 0.3448 | 97.19% | 0.790600 | 0.269200 | 0.00294700 | 0.00241100 | NM_152939       | intron     | 0       | ---       | EMR3     |
| rs724821   | 6  | 11920451  | 0.1208 | 92.98% | 0.035250 | 0.136200 | 0.00297000 | 0.05006000 | NM_032744       | upstream   | 33399   | Hs.126409 | C6orf105 |
| rs1909650  | 13 | 52689896  | 0.2068 | 67.02% | 0.001405 | 0.000290 | 0.00298200 | 0.00392500 | NM_006418       | downstream | 165709  | Hs.559736 | OLFM4    |
| rs7296881  | 12 | 24985803  | 0.1781 | 76.84% | 1.000000 | 1.000000 | 0.00298200 | 0.05271000 | NM_005504       | upstream   | 39711   | Hs.438993 | BCAT1    |
| rs6986526  | 8  | 27325088  | 0.0164 | 85.61% | 0.056610 | 1.000000 | 0.00298300 | 0.07008000 | NM_173175       | intron     | 0       | Hs.491322 | PTK2B    |
| rs7777578  | 7  | 145307815 | 0.1688 | 81.05% | 1.000000 | 1.000000 | 0.00299100 | 0.00057280 | ENST00000385572 | upstream   | 17539   | ---       | ---      |
| rs7222397  | 17 | 65352438  | 0.1887 | 90.18% | 0.105600 | 0.130300 | 0.00299600 | 0.03537000 | NM_002758       | downstream | 301371  | Hs.463978 | MAP2K6   |
| rs7144210  | 14 | 62940684  | 0.3393 | 88.42% | 0.001125 | 0.001773 | 0.00299900 | 0.01053000 | NM_006246       | intron     | 0       | Hs.334868 | PPP2R5E  |
| rs2421857  | 5  | 160352943 | 0.4812 | 83.86% | 0.069990 | 0.261700 | 0.00300100 | 0.00108300 | NM_000813       | downstream | 300506  | Hs.303527 | GABRB2   |
| rs2320760  | 13 | 32379793  | 0.1523 | 97.89% | 0.485400 | 0.474800 | 0.00302600 | 0.00889700 | NM_015032       | downstream | 129636  | Hs.699308 | PDS5B    |
| rs10508247 | 10 | 3171577   | 0.2731 | 87.37% | 0.427400 | 0.265500 | 0.00305900 | 0.00550000 | NM_014889       | intron     | 0       | Hs.528300 | PITRM1   |
| rs10483831 | 14 | 70130397  | 0.2172 | 93.68% | 0.858000 | 0.793000 | 0.00309200 | 0.02216000 | NM_005466       | intron     | 0       | Hs.497353 | MED6     |
| rs1920309  | 3  | 123148169 | 0.3628 | 97.19% | 0.896900 | 0.756900 | 0.00309600 | 0.00289900 | NM_021082       | downstream | 5022    | Hs.518089 | SLC15A2  |
| rs4653643  | 1  | 223742082 | 0.4176 | 93.68% | 0.614600 | 0.291200 | 0.00309900 | 0.00707400 | NM_018212       | 3UTR       | 0       | Hs.497893 | ENAH     |
| rs2593105  | 10 | 55337841  | 0.1816 | 93.68% | 0.541800 | 0.381000 | 0.00311200 | 0.02568000 | NM_033056       | intron     | 0       | Hs.672170 | PCDH15   |
| rs261004   | 5  | 169269201 | 0.4473 | 96.49% | 0.626900 | 0.880500 | 0.00312600 | 0.01998000 | NM_004946       | intron     | 0       | Hs.586174 | DOCK2    |
| rs10491249 | 5  | 126909947 | 0.0789 | 97.89% | 0.682000 | 1.000000 | 0.00315600 | 0.01030000 | NM_130809       | intron     | 0       | Hs.483259 | PRRC1    |
| rs10258159 | 7  | 9222688   | 0.0627 | 97.89% | 0.081060 | 1.000000 | 0.00315900 | 0.01160000 | NM_152745       | downstream | 464764  | Hs.487564 | NXPH1    |
| rs10507372 | 13 | 26221607  | 0.0320 | 93.33% | 0.231900 | 1.000000 | 0.00315900 | 0.00533500 | NM_005288       | downstream | 8840    | Hs.123034 | GPR12    |
| rs784205   | 13 | 101642950 | 0.1254 | 97.89% | 0.591200 | 0.577400 | 0.00316000 | 0.00133300 | NM_175929       | intron     | 0       | Hs.696392 | FGF14    |
| rs10497247 | 2  | 164616298 | 0.1981 | 94.74% | 0.122600 | 0.091450 | 0.00316100 | 0.04815000 | NM_018086       | upstream   | 315539  | Hs.593650 | FIGN     |
| rs10489305 | 1  | 175233447 | 0.2271 | 91.93% | 0.033030 | 0.132600 | 0.00316200 | 0.00623400 | NM_207108       | intron     | 0       | Hs.495897 | ASTN1    |
| rs1404807  | 7  | 145408598 | 0.1090 | 93.33% | 0.530000 | 0.746900 | 0.00317300 | 0.01065000 | NM_014141       | upstream   | 2258914 | Hs.655684 | CNTNAP2  |
| rs10495012 | 1  | 214165591 | 0.3590 | 93.33% | 0.790700 | 0.598500 | 0.00318200 | 0.00385100 | NM_206933       | intron     | 0       | Hs.655974 | USH2A    |
| rs7810561  | 7  | 76741153  | 0.0370 | 94.74% | 0.043170 | 0.076550 | 0.00318800 | 0.07001000 | NM_020879       | intron     | 0       | Hs.113940 | CCDC146  |
| rs12609097 | 19 | 22565844  | 0.1157 | 89.47% | 0.002252 | 0.054170 | 0.00319400 | 0.00634700 | ENST00000387067 | upstream   | 10303   | ---       | ---      |
| rs1986446  | 11 | 97304031  | 0.1703 | 97.89% | 0.286500 | 0.208600 | 0.00319800 | 0.00233900 | ENST00000384812 | downstream | 14932   | ---       | ---      |
| rs10497542 | 2  | 180150259 | 0.2115 | 91.23% | 1.000000 | 1.000000 | 0.00320400 | 0.00404900 | NM_152520       | intron     | 0       | Hs.655005 | ZNF385B  |
| rs2710540  | 4  | 126491349 | 0.2751 | 94.39% | 0.284300 | 0.833900 | 0.00320900 | 0.01651000 | ENST00000364427 | upstream   | 12075   | ---       | ---      |
| rs1559990  | 10 | 79800598  | 0.4523 | 77.19% | 0.000043 | 0.002929 | 0.00321800 | 0.00537200 | ENST00000364523 | downstream | 3212    | ---       | ---      |
| rs1356265  | 12 | 37689963  | 0.3714 | 96.84% | 0.020850 | 0.085320 | 0.00324200 | 0.01146000 | NM_153634       | upstream   | 104263  | Hs.40910  | CPNE8    |

|            |    |           |        |        |          |          |            |            |                 |            |         |           |          |
|------------|----|-----------|--------|--------|----------|----------|------------|------------|-----------------|------------|---------|-----------|----------|
| rs1370005  | 8  | 104514185 | 0.2019 | 94.74% | 0.706000 | 0.788700 | 0.00324800 | 0.00098470 | NM_015420       | intron     | 0       | Hs.532265 | WDSOF1   |
| rs10495266 | 1  | 225313639 | 0.1005 | 73.33% | 0.008913 | 0.058520 | 0.00325300 | 0.00335500 | NM_003607       | intron     | 0       | Hs.35433  | CDC42BPA |
| rs7329659  | 13 | 97872564  | 0.4297 | 92.28% | 0.531300 | 0.871400 | 0.00325400 | 0.00506500 | NM_005766       | intron     | 0       | Hs.403917 | FARP1    |
| rs10488574 | 7  | 75761928  | 0.2646 | 96.14% | 0.876500 | 0.517400 | 0.00329700 | 0.00099530 | NM_00103921     | downstream | 7389    | ---       | FLJ37078 |
| rs10495866 | 2  | 36158207  | 0.0668 | 86.67% | 1.000000 | 1.000000 | 0.00329700 | 0.03991000 | NM_016441       | upstream   | 278366  | Hs.699247 | CRIM1    |
| rs1109786  | 7  | 66696731  | 0.1547 | 97.54% | 0.256800 | 0.805300 | 0.00330000 | 0.00912500 | ENST00000388509 | upstream   | 194678  | ---       | ---      |
| rs951240   | 1  | 153060387 | 0.1155 | 97.19% | 0.033290 | 0.615500 | 0.00330100 | 0.00204500 | NM_002249       | intron     | 0       | Hs.490765 | KCNN3    |
| rs3766587  | 1  | 99928777  | 0.0286 | 85.96% | 0.000373 | 0.001297 | 0.00330600 | 0.99720000 | NM_017734       | intron     | 0       | Hs.483993 | PALMD    |
| rs998225   | 15 | 70544251  | 0.0615 | 91.23% | 1.000000 | 0.210800 | 0.00332500 | 0.00343900 | NM_005744       | upstream   | 9784    | Hs.268787 | ARIH1    |
| rs10506326 | 12 | 52577033  | 0.1558 | 96.84% | 0.820900 | 1.000000 | 0.00332900 | 0.00430500 | NM_017410       | upstream   | 41810   | Hs.118608 | HOXC13   |
| rs3803261  | 13 | 52511082  | 0.2591 | 96.84% | 0.639200 | 1.000000 | 0.00333000 | 0.01214000 | NM_006418       | intron     | 0       | Hs.559736 | OLFM4    |
| rs10503328 | 8  | 5527286   | 0.0258 | 95.09% | 0.158200 | 0.233400 | 0.00333300 | 0.99740000 | ENST00000363751 | downstream | 228560  | ---       | ---      |
| rs7323534  | 13 | 36948451  | 0.2688 | 88.77% | 0.016010 | 0.262100 | 0.00333300 | 0.00136200 | NM_006475       | downstream | 86328   | Hs.136348 | POSTN    |
| rs9315495  | 13 | 36985145  | 0.3814 | 96.14% | 0.124400 | 0.129100 | 0.00334200 | 0.02719000 | NM_006475       | downstream | 49581   | Hs.136348 | POSTN    |
| rs6790281  | 3  | 123148233 | 0.3656 | 97.89% | 0.897300 | 0.642800 | 0.00334800 | 0.00273500 | NM_021082       | downstream | 5086    | Hs.518089 | SLC15A2  |
| rs1029819  | 7  | 77847101  | 0.1967 | 95.44% | 0.701400 | 1.000000 | 0.00338000 | 0.00973900 | NM_012301       | intron     | 0       | Hs.654788 | MAGI2    |
| rs1920241  | 3  | 190776853 | 0.2590 | 97.54% | 0.754300 | 0.511700 | 0.00338500 | 0.00077970 | NM_198485       | downstream | 252889  | Hs.338851 | FAM79B   |
| rs2542930  | 2  | 211416575 | 0.2537 | 94.04% | 0.522300 | 0.500500 | 0.00339100 | 0.00094320 | NM_001875       | downstream | 164501  | Hs.149252 | CPS1     |
| rs1363262  | 5  | 85471132  | 0.1333 | 94.74% | 0.594900 | 0.788700 | 0.00339200 | 0.02370000 | ENST00000380134 | upstream   | 142886  | ---       | ---      |
| rs4450000  | 1  | 191358607 | 0.3741 | 97.54% | 1.000000 | 0.759100 | 0.00341500 | 0.00558100 | NM_024529       | intron     | 0       | Hs.576497 | CDC73    |
| rs10512574 | 17 | 65849559  | 0.2846 | 91.23% | 0.021520 | 0.288100 | 0.00345000 | 0.03284000 | NM_000891       | downstream | 161804  | Hs.1547   | KCNJ2    |
| rs2068338  | 7  | 77846922  | 0.1953 | 96.14% | 0.701700 | 1.000000 | 0.00347600 | 0.01259000 | NM_012301       | intron     | 0       | Hs.654788 | MAGI2    |
| rs10489313 | 1  | 173792149 | 0.0627 | 89.47% | 0.253200 | 1.000000 | 0.00348500 | 0.00103800 | ENST00000367674 | intron     | 0       | ---       | ---      |
| rs10506202 | 12 | 40307615  | 0.3662 | 94.39% | 1.000000 | 0.603400 | 0.00349100 | 0.01514000 | NM_013377       | downstream | 52964   | Hs.380044 | PDZRN4   |
| rs7008914  | 8  | 25936317  | 0.2870 | 94.74% | 0.052450 | 0.233400 | 0.00351800 | 0.05272000 | ENST00000380737 | intron     | 0       | ---       | ---      |
| rs710768   | 12 | 68276718  | 0.2122 | 97.54% | 0.371100 | 1.000000 | 0.00352000 | 0.02547000 | NM_006431       | intron     | 0       | Hs.189772 | CCT2     |
| rs3803260  | 13 | 52511126  | 0.2427 | 96.14% | 0.328100 | 0.644200 | 0.00352700 | 0.00860000 | NM_006418       | intron     | 0       | Hs.559736 | OLFM4    |
| rs10485819 | 20 | 169018    | 0.0774 | 92.98% | 1.000000 | 1.000000 | 0.00353500 | 0.00343300 | NM_080831       | downstream | 10491   | Hs.112087 | DEFB129  |
| rs10506203 | 12 | 40308117  | 0.1111 | 94.74% | 0.754700 | 1.000000 | 0.00356200 | 0.01357000 | NM_013377       | downstream | 53466   | Hs.380044 | PDZRN4   |
| rs10490727 | 2  | 10434959  | 0.1818 | 96.49% | 0.023740 | 0.065200 | 0.00357400 | 0.00718700 | NM_134421       | intron     | 0       | Hs.580427 | HPCAL1   |
| rs1885234  | 9  | 118292098 | 0.4468 | 92.28% | 0.318100 | 0.519800 | 0.00360100 | 0.01052000 | NM_198188       | intron     | 0       | Hs.653266 | ASTN2    |
| rs2029206  | 3  | 151324527 | 0.2011 | 95.09% | 0.449500 | 0.676300 | 0.00360200 | 0.00120700 | ENST00000386021 | upstream   | 46219   | ---       | ---      |
| rs10511710 | 9  | 22874562  | 0.1547 | 92.98% | 0.056400 | 0.046480 | 0.00361200 | 0.00392000 | NM_022160       | downstream | 432090  | Hs.371976 | DMRTA1   |
| rs7857377  | 9  | 118832071 | 0.4392 | 89.47% | 0.524700 | 0.872300 | 0.00363100 | 0.03620000 | NM_198188       | intron     | 0       | Hs.653266 | ASTN2    |
| rs1566100  | 4  | 190265102 | 0.4963 | 94.04% | 0.465100 | 0.650400 | 0.00365200 | 0.04354000 | ENST00000378771 | downstream | 126898  | ---       | ---      |
| rs10502760 | 18 | 37097536  | 0.0778 | 94.74% | 0.666400 | 0.694400 | 0.00368500 | 0.01572000 | NM_002647       | upstream   | 691661  | Hs.464971 | PIK3C3   |
| rs8124344  | 20 | 168757    | 0.0778 | 94.74% | 1.000000 | 1.000000 | 0.00368500 | 0.00285400 | NM_080831       | downstream | 10230   | Hs.112087 | DEFB129  |
| rs1864746  | 14 | 88044552  | 0.1996 | 90.53% | 0.170200 | 0.137200 | 0.00369200 | 0.02427000 | NM_007039       | intron     | 0       | Hs.437040 | PTPN21   |
| rs1073061  | 12 | 52560676  | 0.1601 | 97.54% | 1.000000 | 1.000000 | 0.00372300 | 0.00400900 | NM_017410       | upstream   | 58167   | Hs.118608 | HOXC13   |
| rs10510718 | 3  | 41344071  | 0.0412 | 97.89% | 1.000000 | 1.000000 | 0.00373100 | 0.00250600 | ENST00000301831 | intron     | 0       | ---       | ---      |
| rs10508750 | 10 | 30294185  | 0.0145 | 96.49% | 1.000000 | 1.000000 | 0.00378600 | 0.02087000 | NM_021738       | upstream   | 330278  | Hs.499209 | SVIL     |
| rs7553933  | 1  | 110344608 | 0.0305 | 97.89% | 1.000000 | 1.000000 | 0.00378600 | 0.00252600 | NM_006621       | intron     | 0       | Hs.705418 | AHCYL1   |
| rs1331126  | 1  | 193242564 | 0.2368 | 93.33% | 0.174800 | 0.812600 | 0.00379000 | 0.00396600 | NM_198503       | downstream | 1218972 | Hs.657046 | KCNT2    |
| rs9316069  | 13 | 43561145  | 0.1044 | 87.37% | 1.000000 | 0.187500 | 0.00380600 | 0.00962800 | ENST00000267129 | downstream | 71592   | ---       | ---      |
| rs1429143  | 6  | 53372444  | 0.3032 | 97.19% | 1.000000 | 0.323200 | 0.00381300 | 0.00754600 | ENST00000388337 | downstream | 15779   | ---       | ---      |
| rs698458   | 9  | 106273931 | 0.3303 | 95.09% | 0.132800 | 0.364300 | 0.00382500 | 0.00441200 | NM_001004485    | upstream   | 32434   | Hs.553602 | OR13F1   |
| rs1531208  | 8  | 95306174  | 0.3405 | 97.89% | 0.142400 | 0.472300 | 0.00383100 | 0.00279100 | NM_004063       | upstream   | 16188   | Hs.591853 | CDH17    |
| rs7531479  | 1  | 36902174  | 0.2622 | 93.68% | 0.428600 | 0.125900 | 0.00384300 | 0.00633800 | NM_000831       | downstream | 137027  | Hs.654524 | GRIK3    |
| rs1224635  | 15 | 45906253  | 0.0593 | 94.74% | 0.232200 | 0.300800 | 0.00384600 | 0.01064000 | NM_024966       | downstream | 56217   | Hs.511265 | SEMA6D   |
| rs1072385  | 6  | 144192302 | 0.1042 | 92.63% | 0.329000 | 0.316400 | 0.00387700 | 0.01552000 | NM_014721       | downstream | 3417    | Hs.654921 | PHACTR2  |
| rs1788155  | 8  | 100867916 | 0.2915 | 95.09% | 0.379400 | 0.159200 | 0.00387800 | 0.01581000 | NM_017890       | intron     | 0       | Hs.191540 | VPS13B   |
| rs1351253  | 11 | 79732182  | 0.1165 | 97.89% | 1.000000 | 0.127600 | 0.00388500 | 0.00075630 | ENST00000363276 | upstream   | 184470  | ---       | ---      |
| rs198045   | 21 | 23450216  | 0.1240 | 86.32% | 0.004990 | 0.004138 | 0.00388600 | 0.05158000 | ENST00000364042 | downstream | 125749  | ---       | ---      |
| rs2025804  | 1  | 65718709  | 0.4011 | 97.54% | 0.534400 | 0.761600 | 0.00388800 | 0.01725000 | NM_001003680    | intron     | 0       | Hs.705413 | LEPR     |

|            |    |           |        |        |          |          |            |            |                 |            |        |           |          |
|------------|----|-----------|--------|--------|----------|----------|------------|------------|-----------------|------------|--------|-----------|----------|
| rs4395341  | 22 | 21036563  | 0.0573 | 97.89% | 1.000000 | 1.000000 | 0.00390200 | 0.00820800 | ENST00000334392 | upstream   | 907    | ---       | ---      |
| rs10486618 | 7  | 33793938  | 0.2606 | 74.74% | 0.021280 | 0.228000 | 0.00390500 | 0.01100000 | ENST00000366310 | upstream   | 18150  | ---       | ---      |
| rs10512304 | 9  | 104487856 | 0.0524 | 93.68% | 0.003075 | 0.006078 | 0.00393200 | 0.12960000 | NM_001340       | upstream   | 309558 | Hs.3232   | CYLC2    |
| rs16971911 | 16 | 71984877  | 0.0316 | 94.39% | 0.000000 | 0.000128 | 0.00394500 | 0.09154000 | NM_207385       | upstream   | 249030 | ---       | C16orf47 |
| rs10500270 | 19 | 39302438  | 0.2119 | 94.39% | 0.028460 | 0.024560 | 0.00396500 | 0.00373200 | NM_015578       | upstream   | 52873  | Hs.407368 | LSM14A   |
| rs1546792  | 3  | 106476224 | 0.3502 | 97.19% | 0.292000 | 0.859800 | 0.00398600 | 0.00827300 | NM_001627       | upstream   | 92179  | Hs.591293 | ALCAM    |
| rs7584596  | 2  | 174158643 | 0.1567 | 94.04% | 0.250500 | 1.000000 | 0.00399900 | 0.04450000 | ENST00000306716 | upstream   | 99307  | ---       | ---      |
| rs10499773 | 7  | 63477213  | 0.0456 | 92.28% | 0.422700 | 1.000000 | 0.00401000 | 0.02937000 | NM_178558       | downstream | 140488 | Hs.520886 | ZNF680   |
| rs1586601  | 8  | 118487189 | 0.3429 | 91.58% | 0.891600 | 1.000000 | 0.00401800 | 0.00445500 | NM_080651       | upstream   | 115022 | Hs.492612 | MED30    |
| rs6686648  | 1  | 171213383 | 0.0465 | 94.39% | 0.442600 | 0.536300 | 0.00405600 | 0.00945000 | NM_005092       | downstream | 62340  | Hs.248197 | TNFSF18  |
| rs4733653  | 8  | 129913853 | 0.3353 | 88.42% | 0.573100 | 0.850600 | 0.00405800 | 0.00911500 | ENST00000384930 | upstream   | 12548  | ---       | ---      |
| rs4770010  | 13 | 19840037  | 0.3496 | 93.33% | 0.139400 | 0.113400 | 0.00406600 | 0.01033000 | NM_015974       | downstream | 35773  | Hs.370703 | CRYL1    |
| rs10501549 | 11 | 83230041  | 0.1075 | 97.89% | 0.538400 | 0.286100 | 0.00408000 | 0.02212000 | NM_001364       | intron     | 0      | Hs.654862 | DLG2     |
| rs10508566 | 10 | 19060072  | 0.1075 | 97.89% | 0.538400 | 0.604300 | 0.00408000 | 0.01128000 | NM_178815       | downstream | 53126  | Hs.25362  | ARL5B    |
| rs10510781 | 3  | 56095537  | 0.1075 | 97.89% | 0.538400 | 1.000000 | 0.00408000 | 0.01457000 | NM_015576       | intron     | 0      | Hs.476389 | ERC2     |
| rs10521151 | 17 | 6468330   | 0.1297 | 93.33% | 0.059050 | 1.000000 | 0.00408700 | 0.05561000 | NM_014804       | intron     | 0      | Hs.28070  | KIAA0753 |
| rs1482089  | 4  | 86737021  | 0.4173 | 93.33% | 0.165400 | 0.445600 | 0.00412200 | 0.01970000 | NM_001025616    | intron     | 0      | Hs.444229 | ARHGAP24 |
| rs10495790 | 2  | 33572977  | 0.0616 | 94.04% | 1.000000 | 1.000000 | 0.00414500 | 0.00822800 | NM_170672       | intron     | 0      | Hs.143674 | RASGRP3  |
| rs10494100 | 1  | 109175124 | 0.0693 | 83.51% | 0.017290 | 0.021680 | 0.00415100 | 0.00851300 | NM_152763       | intron     | 0      | Hs.514662 | C1orf62  |
| rs724946   | 13 | 29575163  | 0.1697 | 95.09% | 0.192700 | 0.239500 | 0.00415400 | 0.04088000 | NM_001014380    | downstream | 99604  | Hs.243596 | KATNAL1  |
| rs941458   | 6  | 126395967 | 0.3834 | 67.72% | 0.170900 | 0.280700 | 0.00415900 | 0.01177000 | NM_001031712    | intron     | 0      | Hs.404186 | TRMT11   |
| rs1823634  | 11 | 4397414   | 0.2518 | 96.14% | 0.422500 | 0.823300 | 0.00419700 | 0.01676000 | NM_003141       | upstream   | 25912  | Hs.532357 | TRIM21   |
| rs2631268  | 4  | 103167753 | 0.4089 | 94.39% | 1.000000 | 0.253700 | 0.00420400 | 0.02611000 | NM_017935       | intron     | 0      | Hs.480400 | BANK1    |
| rs10491514 | 9  | 128141839 | 0.3132 | 92.98% | 0.886500 | 0.568000 | 0.00421300 | 0.12480000 | NM_001011703    | intron     | 0      | Hs.162659 | FAM125B  |
| rs294975   | 5  | 73783037  | 0.4373 | 92.28% | 0.802700 | 1.000000 | 0.00421300 | 0.01702000 | NM_003633       | downstream | 175953 | Hs.104925 | ENC1     |
| rs10514306 | 5  | 88696674  | 0.0591 | 97.89% | 0.243000 | 1.000000 | 0.00422800 | 0.01090000 | NM_002397       | upstream   | 481856 | Hs.699175 | MEF2C    |
| rs477184   | 20 | 13249361  | 0.4927 | 95.79% | 0.275700 | 1.000000 | 0.00424700 | 0.03332000 | NM_017714       | downstream | 68678  | Hs.369932 | TASP1    |
| rs1010392  | 13 | 80764681  | 0.4185 | 94.74% | 0.381400 | 1.000000 | 0.00426800 | 0.00147200 | ENST00000387380 | downstream | 26729  | ---       | ---      |
| rs314734   | 5  | 10085216  | 0.4386 | 97.19% | 0.272100 | 1.000000 | 0.00428500 | 0.00130500 | ENST00000358163 | upstream   | 169405 | ---       | ---      |
| rs7161750  | 15 | 50951074  | 0.0957 | 89.82% | 0.263600 | 0.274900 | 0.00431700 | 0.04738000 | NM_004498       | upstream   | 81573  | Hs.658573 | ONECUT1  |
| rs2250237  | 12 | 89207142  | 0.2180 | 87.72% | 0.004641 | 0.039030 | 0.00432800 | 0.02338000 | ENST00000388111 | downstream | 562212 | ---       | ---      |
| rs1462111  | 5  | 152658514 | 0.1778 | 94.74% | 0.208900 | 0.027580 | 0.00433700 | 0.00360700 | NM_000827       | upstream   | 191985 | Hs.519693 | GRIA1    |
| rs1560048  | 5  | 91178732  | 0.0270 | 97.54% | 1.000000 | 1.000000 | 0.00435300 | 0.00308000 | NM_020801       | upstream   | 463855 | Hs.24684  | ARRDC3   |
| rs2058063  | 17 | 65669435  | 0.2284 | 97.54% | 0.306600 | 0.701000 | 0.00438100 | 0.02752000 | NM_000891       | upstream   | 7836   | Hs.1547   | KCNJ2    |
| rs268866   | 2  | 65344163  | 0.3509 | 92.98% | 0.002856 | 0.024420 | 0.00438600 | 0.00335100 | NM_005722       | intron     | 0      | Hs.699451 | ACTR2    |
| rs1351419  | 4  | 71235977  | 0.0221 | 95.09% | 1.000000 | 1.000000 | 0.00441200 | 0.10300000 | NM_033122       | CDS        | 0      | Hs.120316 | C4orf35  |
| rs2590713  | 12 | 52549809  | 0.1533 | 96.14% | 0.815200 | 1.000000 | 0.00442100 | 0.00576700 | NM_017410       | upstream   | 69034  | Hs.118608 | HOXC13   |
| rs1319309  | 11 | 7276742   | 0.4583 | 96.84% | 0.903500 | 0.641500 | 0.00442700 | 0.00581300 | NM_175733       | intron     | 0      | Hs.177193 | SYT9     |
| rs1516606  | 3  | 96503218  | 0.4754 | 92.63% | 0.621400 | 0.447200 | 0.00442900 | 0.09270000 | ENST00000332119 | upstream   | 363660 | ---       | ---      |
| rs2968392  | 5  | 22358920  | 0.0094 | 93.68% | 1.000000 | 1.000000 | 0.00443300 | 0.99840000 | NM_004061       | intron     | 0      | Hs.113684 | CDH12    |
| rs511189   | 3  | 96496203  | 0.4549 | 97.19% | 0.716400 | 0.368100 | 0.00444000 | 0.07561000 | ENST00000332119 | upstream   | 356645 | ---       | ---      |
| rs9323099  | 14 | 44019800  | 0.3195 | 93.33% | 0.779800 | 0.346500 | 0.00444200 | 0.01708000 | NM_032135       | downstream | 23663  | Hs.307086 | FSCB     |
| rs925140   | 2  | 17226171  | 0.3656 | 97.89% | 0.897300 | 0.732000 | 0.00444400 | 0.01235000 | NM_003385       | upstream   | 359118 | Hs.444212 | VSNL1    |
| rs2731938  | 3  | 21371100  | 0.3433 | 94.04% | 0.138300 | 0.199400 | 0.00445900 | 0.01841000 | ENST00000295509 | upstream   | 51424  | ---       | ---      |
| rs261009   | 5  | 169272733 | 0.4462 | 97.89% | 0.116800 | 0.295000 | 0.00446400 | 0.06296000 | NM_004946       | intron     | 0      | Hs.586174 | DOCK2    |
| rs9317034  | 13 | 58443546  | 0.3151 | 92.98% | 0.394800 | 0.406400 | 0.00447500 | 0.00430200 | ENST00000365514 | upstream   | 443660 | ---       | ---      |
| rs466380   | 5  | 129204748 | 0.0881 | 97.54% | 0.246400 | 0.019240 | 0.00448400 | 0.00497200 | NM_175856       | upstream   | 63674  | Hs.213137 | CHSY-2   |
| rs10505670 | 8  | 138282298 | 0.0461 | 95.09% | 0.440100 | 1.000000 | 0.00449600 | 0.00195800 | NM_015912       | downstream | 931410 | Hs.126024 | FAM135B  |
| rs4376443  | 7  | 110178825 | 0.2967 | 95.79% | 0.083110 | 0.317200 | 0.00452600 | 0.00603900 | NM_032549       | intron     | 0      | Hs.655722 | IMMP2L   |
| rs10485128 | 6  | 79428165  | 0.1302 | 92.98% | 0.173800 | 0.658900 | 0.00453600 | 0.01912000 | NM_001010844    | upstream   | 205743 | Hs.656212 | IRAK1BP1 |
| rs2102137  | 5  | 104720450 | 0.1421 | 95.09% | 0.317900 | 1.000000 | 0.00455600 | 0.00580100 | ENST00000364920 | downstream | 566155 | ---       | ---      |
| rs1326468  | 13 | 47064268  | 0.1212 | 92.63% | 1.000000 | 0.366600 | 0.00456600 | 0.01041000 | NM_003850       | downstream | 350524 | Hs.546323 | SUCLA2   |
| rs10511695 | 9  | 21035062  | 0.2222 | 94.74% | 0.596700 | 1.000000 | 0.00457200 | 0.00727800 | NM_001010915    | upstream   | 13422  | Hs.136247 | PTPLAD2  |
| rs9314317  | 8  | 25889869  | 0.1162 | 95.09% | 0.227400 | 0.624300 | 0.00457200 | 0.02241000 | ENST00000380737 | intron     | 0      | ---       | ---      |

|            |    |           |        |        |          |          |            |            |                 |            |        |           |          |
|------------|----|-----------|--------|--------|----------|----------|------------|------------|-----------------|------------|--------|-----------|----------|
| rs10504243 | 8  | 59148054  | 0.0615 | 85.61% | 0.000000 | 0.000000 | 0.00458800 | 0.09920000 | NM_147189       | intron     | 0      | Hs.154652 | FAM110B  |
| rs10483385 | 14 | 29697941  | 0.0092 | 95.09% | 1.000000 | 1.000000 | 0.00459300 | 0.99840000 | NM_017769       | upstream   | 400187 | Hs.509008 | KIAA1333 |
| rs10518281 | 19 | 20282246  | 0.0093 | 94.04% | 1.000000 | 1.000000 | 0.00459800 | 0.99840000 | NM_021047       | downstream | 5835   | Hs.659321 | ZNF253   |
| rs1578125  | 1  | 191885531 | 0.0773 | 97.54% | 0.066870 | 0.083310 | 0.00460700 | 0.02722000 | NM_024529       | downstream | 395877 | Hs.576497 | CDC73    |
| rs763836   | 2  | 29758808  | 0.2372 | 96.14% | 0.403900 | 1.000000 | 0.00464300 | 0.00675700 | NM_004304       | intron     | 0      | Hs.654469 | ALK      |
| rs9317121  | 13 | 60038079  | 0.1045 | 94.04% | 0.014640 | 0.014440 | 0.00465000 | 0.02825000 | NM_030794       | intron     | 0      | Hs.525061 | TDRD3    |
| rs10496771 | 2  | 137913739 | 0.1906 | 97.54% | 0.845700 | 0.830500 | 0.00465400 | 0.02262000 | ENST00000272643 | intron     | 0      | ---       | ---      |
| rs10504452 | 8  | 70626236  | 0.1330 | 93.68% | 0.281600 | 0.262000 | 0.00466400 | 0.01458000 | NM_015170       | intron     | 0      | Hs.409602 | SULF1    |
| rs2153639  | 6  | 63803845  | 0.3817 | 91.93% | 0.088190 | 0.028280 | 0.00467100 | 0.00213600 | ENST00000370659 | upstream   | 175465 | ---       | ---      |
| rs10495671 | 2  | 17907509  | 0.4910 | 97.54% | 0.071520 | 0.071730 | 0.00467800 | 0.01394000 | NM_002252       | upstream   | 15917  | Hs.414489 | KCNS3    |
| rs9969156  | 7  | 11158039  | 0.0093 | 94.74% | 1.000000 | 1.000000 | 0.00467900 | 0.99840000 | NM_014660       | intron     | 0      | Hs.655688 | PHF14    |
| rs10514492 | 16 | 78917727  | 0.2413 | 90.88% | 0.311500 | 0.849800 | 0.00469100 | 0.02692000 | NM_130897       | upstream   | 214628 | Hs.98849  | DYNLRB2  |
| rs10517457 | 4  | 37631234  | 0.1320 | 94.39% | 0.191200 | 0.260800 | 0.00470700 | 0.00438100 | NM_015173       | intron     | 0      | Hs.176503 | TBC1D1   |
| rs1412859  | 13 | 60295951  | 0.1888 | 97.54% | 0.169300 | 0.281400 | 0.00471300 | 0.00540300 | NM_022843       | downstream | 585868 | Hs.391781 | PCDH20   |
| rs1016425  | 18 | 62675708  | 0.3717 | 92.98% | 0.896100 | 1.000000 | 0.00471700 | 0.00351900 | NM_021153       | upstream   | 253512 | Hs.42771  | CDH19    |
| rs10491541 | 9  | 84709128  | 0.3050 | 76.49% | 0.002302 | 0.016130 | 0.00472500 | 0.02795000 | NM_152573       | downstream | 75192  | Hs.657750 | RASEF    |
| rs10497167 | 2  | 156745232 | 0.2879 | 92.63% | 0.016250 | 0.534900 | 0.00475500 | 0.01197000 | NM_173173       | downstream | 143962 | Hs.563344 | NR4A2    |
| rs645462   | 1  | 107758386 | 0.0093 | 94.39% | 1.000000 | 1.000000 | 0.00476700 | 0.99840000 | NM_014917       | intron     | 0      | Hs.657434 | NTNG1    |
| rs2288627  | 2  | 222028671 | 0.2644 | 97.54% | 0.644000 | 1.000000 | 0.00481300 | 0.00227400 | NM_004438       | intron     | 0      | Hs.371218 | EPHA4    |
| rs2208363  | 1  | 116519546 | 0.3185 | 94.74% | 0.068410 | 0.007812 | 0.00482000 | 0.02042000 | NM_152367       | downstream | 40162  | Hs.376194 | C1orf161 |
| rs10490569 | 2  | 25854931  | 0.2391 | 96.14% | 0.410600 | 0.573700 | 0.00484400 | 0.00237600 | NM_018263       | intron     | 0      | Hs.700650 | ASXL2    |
| rs1144700  | 6  | 16852666  | 0.2838 | 80.35% | 0.000000 | 0.000045 | 0.00484500 | 0.01023000 | NM_000332       | intron     | 0      | Hs.434961 | ATXN1    |
| rs1418245  | 9  | 103800425 | 0.2968 | 97.54% | 0.565600 | 0.316300 | 0.00485300 | 0.00492600 | ENST00000386444 | upstream   | 204498 | ---       | ---      |
| rs2370596  | 12 | 2536609   | 0.3222 | 94.74% | 0.405100 | 0.578000 | 0.00486000 | 0.01263000 | NM_000719       | intron     | 0      | Hs.118262 | CACNA1C  |
| rs1510228  | 6  | 160727393 | 0.2075 | 92.98% | 0.851700 | 1.000000 | 0.00486500 | 0.01454000 | NM_021977       | intron     | 0      | Hs.567337 | SLC22A3  |
| rs684431   | 1  | 206232040 | 0.4833 | 94.39% | 0.328900 | 0.879700 | 0.00487000 | 0.01062000 | NM_025179       | downstream | 30170  | Hs.497626 | PLXNA2   |
| rs1788153  | 8  | 100749604 | 0.2873 | 94.04% | 0.138900 | 0.039190 | 0.00488400 | 0.02248000 | NM_017890       | intron     | 0      | Hs.191540 | VPS13B   |
| rs10497284 | 2  | 166915599 | 0.1827 | 95.09% | 1.000000 | 0.662400 | 0.00490000 | 0.01818000 | ENST00000385475 | upstream   | 7895   | ---       | ---      |
| rs2893603  | 8  | 128149139 | 0.3825 | 94.04% | 0.517600 | 0.877600 | 0.00491200 | 0.00080360 | ENST00000385818 | downstream | 396058 | ---       | ---      |
| rs1541836  | 18 | 19749481  | 0.3480 | 95.79% | 0.893900 | 1.000000 | 0.00491900 | 0.00988200 | NM_000227       | intron     | 0      | Hs.436367 | LAMA3    |
| rs530701   | 12 | 68268129  | 0.1981 | 94.74% | 0.341400 | 0.832500 | 0.00492200 | 0.03020000 | NM_006431       | intron     | 0      | Hs.189772 | CC22     |
| rs1370107  | 10 | 128272839 | 0.1297 | 93.33% | 0.589400 | 0.256200 | 0.00492300 | 0.01079000 | NM_001004298    | upstream   | 72839  | Hs.587663 | C10orf90 |
| rs336604   | 3  | 18595288  | 0.2712 | 95.09% | 0.539200 | 0.668800 | 0.00493400 | 0.00239100 | NM_002971       | upstream   | 140080 | Hs.517717 | SATB1    |
| rs560104   | 9  | 109774726 | 0.3315 | 93.68% | 0.333700 | 0.063880 | 0.00494300 | 0.00748100 | ENST00000297812 | upstream   | 137795 | ---       | ---      |
| rs10492534 | 13 | 96286031  | 0.0094 | 93.68% | 1.000000 | 1.000000 | 0.00494900 | 0.99840000 | NM_153456       | downstream | 2359   | Hs.171001 | HS6ST3   |
| rs10509334 | 10 | 73110058  | 0.3035 | 80.35% | 0.000280 | 0.000037 | 0.00495800 | 0.02532000 | NM_052836       | intron     | 0      | Hs.656032 | CDH23    |
| rs1018462  | 6  | 162061886 | 0.2565 | 94.39% | 0.053880 | 0.365300 | 0.00496700 | 0.01824000 | NM_013988       | intron     | 0      | Hs.132954 | PARK2    |
| rs283625   | 5  | 73235295  | 0.3381 | 86.67% | 0.001008 | 0.013360 | 0.00496700 | 0.01616000 | ENST00000287898 | intron     | 0      | ---       | ---      |
| rs797124   | 6  | 5305431   | 0.3971 | 97.19% | 0.104300 | 0.127600 | 0.00498400 | 0.01073000 | NM_006567       | intron     | 0      | Hs.484547 | FARS2    |
| rs10489592 | 1  | 118241518 | 0.0944 | 94.74% | 1.000000 | 0.178000 | 0.00498700 | 0.00811500 | NM_017686       | intron     | 0      | Hs.705484 | GDAP2    |
| rs10487394 | 7  | 117672274 | 0.0644 | 92.63% | 0.288500 | 1.000000 | 0.00501200 | 0.03244000 | NM_019644       | downstream | 2297   | Hs.657737 | ANKRD7   |
| rs10493367 | 1  | 64978736  | 0.1172 | 95.79% | 0.232600 | 0.625100 | 0.00502300 | 0.00865400 | NM_018211       | upstream   | 4630   | Hs.591443 | RAVER2   |
| rs6904988  | 6  | 149134151 | 0.2690 | 97.19% | 0.033380 | 0.035990 | 0.00502400 | 0.01013000 | NM_005715       | intron     | 0      | Hs.657370 | UST      |
| rs6962865  | 7  | 133249973 | 0.3014 | 97.19% | 0.198100 | 0.506500 | 0.00503000 | 0.02385000 | NM_001037126    | intron     | 0      | Hs.321273 | EXOC4    |
| rs6963032  | 7  | 133250067 | 0.3014 | 97.19% | 0.198100 | 0.506500 | 0.00503000 | 0.02385000 | NM_001037126    | intron     | 0      | Hs.321273 | EXOC4    |
| rs10509453 | 10 | 84043171  | 0.3957 | 97.54% | 0.900600 | 0.743000 | 0.00504800 | 0.03098000 | NM_001010848    | intron     | 0      | Hs.125119 | NRG3     |
| rs2127125  | 13 | 80754418  | 0.3957 | 97.54% | 0.532200 | 1.000000 | 0.00504800 | 0.00137800 | ENST00000387380 | downstream | 16466  | ---       | ---      |
| rs10504607 | 8  | 77124396  | 0.0888 | 90.88% | 1.000000 | 1.000000 | 0.00504900 | 0.00364100 | ENST00000388687 | downstream | 86681  | ---       | ---      |
| rs10508689 | 10 | 25562286  | 0.1476 | 95.09% | 0.330900 | 1.000000 | 0.00507000 | 0.02765000 | NM_020752       | intron     | 0      | Hs.499108 | GPR158   |
| rs9294066  | 6  | 63801937  | 0.3900 | 90.88% | 0.013030 | 0.002401 | 0.00507500 | 0.00334000 | ENST00000370659 | upstream   | 177373 | ---       | ---      |
| rs851982   | 6  | 152066678 | 0.4106 | 96.14% | 0.707900 | 0.648900 | 0.00508200 | 0.00284900 | NM_025059       | downstream | 82658  | Hs.660044 | C6orf97  |
| rs10484538 | 6  | 23576145  | 0.0333 | 94.74% | 0.253900 | 1.000000 | 0.00508800 | 0.00772600 | ENST00000384664 | upstream   | 342851 | ---       | ---      |
| rs2413163  | 22 | 31777946  | 0.3059 | 95.79% | 0.887100 | 0.241200 | 0.00509400 | 0.00790100 | NM_133633       | upstream   | 45299  | Hs.658998 | SYN3     |
| rs1927626  | 9  | 16577758  | 0.0618 | 96.49% | 1.000000 | 0.234600 | 0.00509900 | 0.00586600 | NM_017637       | intron     | 0      | Hs.656581 | BNC2     |



|            |    |           |        |        |          |          |            |            |                 |            |         |           |           |
|------------|----|-----------|--------|--------|----------|----------|------------|------------|-----------------|------------|---------|-----------|-----------|
| rs10500734 | 11 | 10898494  | 0.1310 | 95.09% | 0.790700 | 1.000000 | 0.00511600 | 0.00982800 | NM_021211       | upstream   | 62304   | ---       | ZBED5     |
| rs1422004  | 5  | 108680199 | 0.4058 | 96.84% | 0.061530 | 0.141700 | 0.00513200 | 0.00975500 | NM_014819       | downstream | 18110   | Hs.483036 | PJA2      |
| rs576861   | 1  | 223810960 | 0.4164 | 96.49% | 1.000000 | 0.762100 | 0.00514100 | 0.01080000 | NM_018212       | intron     | 0       | Hs.497893 | ENAH      |
| rs3788961  | 2  | 17962686  | 0.3046 | 91.58% | 0.561900 | 0.326500 | 0.00514400 | 0.03106000 | NM_002252       | intron     | 0       | Hs.414489 | KCNS3     |
| rs4655769  | 1  | 68249566  | 0.1594 | 96.84% | 0.653100 | 0.809200 | 0.00516300 | 0.07540000 | NM_004675       | downstream | 34667   | Hs.194695 | DIRAS3    |
| rs10504600 | 8  | 77043891  | 0.1066 | 85.61% | 0.086300 | 0.601000 | 0.00517900 | 0.00515800 | ENST00000388682 | upstream   | 76197   | ---       | ---       |
| rs458490   | 5  | 129198311 | 0.0849 | 95.09% | 0.110100 | 0.014690 | 0.00519800 | 0.00755700 | NM_175856       | upstream   | 70111   | Hs.213137 | CHSY-2    |
| rs9294040  | 6  | 77653677  | 0.2097 | 87.02% | 0.442800 | 1.000000 | 0.00519900 | 0.00547400 | NM_000863       | downstream | 574990  | Hs.123016 | HTR1B     |
| rs4074672  | 3  | 185212989 | 0.3321 | 92.98% | 0.582000 | 0.348600 | 0.00522300 | 0.00086480 | NM_001023587    | intron     | 0       | Hs.368563 | ABCC5     |
| rs1527894  | 2  | 49501529  | 0.1953 | 97.89% | 0.187300 | 0.780200 | 0.00524200 | 0.00283400 | ENST00000384188 | upstream   | 186987  | ---       | ---       |
| rs10487563 | 7  | 48905713  | 0.1899 | 93.33% | 0.842700 | 1.000000 | 0.00528700 | 0.01365000 | ENST00000324993 | upstream   | 28990   | ---       | ---       |
| rs10504463 | 8  | 71109147  | 0.1272 | 97.89% | 1.000000 | 1.000000 | 0.00531700 | 0.01245000 | NM_024504       | downstream | 17427   | Hs.287532 | PRDM14    |
| rs2206416  | 20 | 39994257  | 0.3978 | 94.39% | 0.704000 | 1.000000 | 0.00532100 | 0.02191000 | NM_007050       | downstream | 140549  | Hs.526879 | PTPRT     |
| rs2254476  | 21 | 22157475  | 0.4205 | 92.63% | 0.613200 | 0.145400 | 0.00532100 | 0.02564000 | ENST00000358903 | downstream | 219002  | ---       | ---       |
| rs10484203 | 14 | 48649112  | 0.0102 | 86.32% | 0.020300 | 1.000000 | 0.00532800 | 0.99830000 | ENST00000386332 | upstream   | 439989  | ---       | ---       |
| rs1402111  | 15 | 52599143  | 0.1774 | 97.89% | 0.680400 | 0.761300 | 0.00535800 | 0.03704000 | ENST00000260323 | intron     | 0       | ---       | ---       |
| rs1517044  | 6  | 70950780  | 0.4206 | 97.19% | 1.000000 | 1.000000 | 0.00537900 | 0.00484900 | NM_001858       | intron     | 0       | Hs.444842 | COL19A1   |
| rs291870   | 5  | 102869587 | 0.1704 | 94.74% | 1.000000 | 1.000000 | 0.00538800 | 0.01274000 | NM_031438       | downstream | 42868   | Hs.434289 | NUDT12    |
| rs10510207 | 3  | 1309530   | 0.0415 | 92.98% | 1.000000 | 1.000000 | 0.00539300 | 0.01141000 | NM_014461       | intron     | 0       | Hs.387300 | CNTN6     |
| rs2549513  | 16 | 78108228  | 0.1063 | 94.04% | 0.095520 | 0.191700 | 0.00539300 | 0.00296600 | NM_001031804    | downstream | 77508   | Hs.134859 | MAF       |
| rs10517967 | 4  | 66752247  | 0.3667 | 94.74% | 0.149200 | 0.486100 | 0.00540500 | 0.02133000 | ENST00000339867 | downstream | 109410  | ---       | ---       |
| rs2199133  | 13 | 85821511  | 0.0425 | 90.88% | 1.000000 | 1.000000 | 0.00540700 | 0.01777000 | NM_032229       | upstream   | 552867  | Hs.525105 | SLITRK6   |
| rs4941701  | 13 | 32383476  | 0.1357 | 94.39% | 0.797000 | 0.697500 | 0.00540800 | 0.01510000 | NM_015032       | downstream | 133319  | Hs.699308 | PDS5B     |
| rs7578684  | 2  | 56485672  | 0.4291 | 91.58% | 0.208600 | 0.360900 | 0.00541000 | 0.00628200 | NM_006296       | upstream   | 1641552 | Hs.631890 | VRK2      |
| rs2380684  | 2  | 15915808  | 0.3668 | 96.14% | 1.000000 | 0.877500 | 0.00541100 | 0.01626000 | NM_004939       | downstream | 227132  | Hs.440599 | DDX1      |
| rs9308849  | 2  | 101891819 | 0.2849 | 90.53% | 0.091960 | 0.531800 | 0.00541300 | 0.00531300 | NM_145687       | downstream | 14236   | Hs.431550 | MAP4K4    |
| rs9293473  | 5  | 86003832  | 0.0430 | 89.82% | 0.375700 | 1.000000 | 0.00541400 | 0.01514000 | NM_001039781    | downstream | 377687  | ---       | LOC645261 |
| rs10497168 | 2  | 156743961 | 0.3948 | 88.42% | 0.692500 | 0.752300 | 0.00541700 | 0.00065260 | NM_173173       | downstream | 145233  | Hs.563344 | NR4A2     |
| rs2126270  | 4  | 179740134 | 0.1094 | 92.98% | 0.216300 | 0.528800 | 0.00541800 | 0.04063000 | ENST00000364857 | downstream | 175176  | ---       | ---       |
| rs10488500 | 7  | 76679195  | 0.0512 | 89.12% | 1.000000 | 1.000000 | 0.00543400 | 0.02862000 | NM_020879       | intron     | 0       | Hs.113940 | CCDC146   |
| rs10488164 | 7  | 132756739 | 0.1896 | 94.39% | 0.326600 | 0.191200 | 0.00544800 | 0.00394500 | NM_001037126    | intron     | 0       | Hs.321273 | EXOC4     |
| rs10497330 | 2  | 168508565 | 0.0321 | 87.37% | 0.220200 | 1.000000 | 0.00547600 | 0.05666000 | NM_013233       | downstream | 10212   | Hs.276271 | STK39     |
| rs10484612 | 6  | 99516963  | 0.0717 | 97.89% | 0.007799 | 0.328600 | 0.00548700 | 0.01328000 | NM_012160       | upstream   | 14393   | Hs.536850 | FBXL4     |
| rs2291103  | 10 | 3180797   | 0.2135 | 93.68% | 1.000000 | 0.795300 | 0.00549800 | 0.04133000 | NM_014889       | intron     | 0       | Hs.528300 | PITRM1    |
| rs6736527  | 2  | 64806767  | 0.0653 | 94.04% | 0.017830 | 1.000000 | 0.00549900 | 0.02446000 | NM_014755       | upstream   | 72217   | Hs.693696 | SERTAD2   |
| rs1414185  | 6  | 77626327  | 0.2389 | 86.67% | 0.000789 | 0.010850 | 0.00551100 | 0.00662900 | NM_000863       | downstream | 602314  | Hs.123016 | HTR1B     |
| rs10502313 | 18 | 3310158   | 0.0207 | 84.56% | 0.002677 | 1.000000 | 0.00555300 | 0.03962000 | NM_033546       | downstream | 41911   | Hs.464472 | MRLC2     |
| rs2157988  | 17 | 65225865  | 0.3974 | 80.35% | 0.000000 | 0.000000 | 0.00555400 | 0.07882000 | NM_002758       | downstream | 174798  | Hs.463978 | MAP2K6    |
| rs2807238  | 10 | 25548043  | 0.1537 | 94.74% | 1.000000 | 0.476700 | 0.00556200 | 0.01341000 | NM_020752       | intron     | 0       | Hs.499108 | GPR158    |
| rs10518026 | 4  | 67747953  | 0.0343 | 97.19% | 0.273400 | 1.000000 | 0.00558100 | 0.00217800 | ENST00000383902 | downstream | 229952  | ---       | ---       |
| rs7126337  | 11 | 7233719   | 0.4353 | 97.54% | 0.903500 | 0.209800 | 0.00559000 | 0.00489600 | NM_175733       | intron     | 0       | Hs.177193 | SYT9      |
| rs10502019 | 11 | 103218742 | 0.1222 | 94.74% | 0.255400 | 1.000000 | 0.00564200 | 0.00047050 | NM_033135       | downstream | 64389   | Hs.352298 | PDGFD     |
| rs152581   | 5  | 106822183 | 0.4229 | 97.89% | 0.327100 | 0.231100 | 0.00564900 | 0.00815200 | NM_001962       | intron     | 0       | Hs.658451 | EFNA5     |
| rs10513373 | 3  | 151604811 | 0.2015 | 95.79% | 0.708000 | 1.000000 | 0.00565700 | 0.00761600 | NM_014779       | upstream   | 4001    | Hs.644065 | TSC22D2   |
| rs2457570  | 6  | 160749508 | 0.1896 | 94.39% | 1.000000 | 0.769800 | 0.00565900 | 0.00835500 | NM_021977       | intron     | 0       | Hs.567337 | SLC22A3   |
| rs266638   | 5  | 125704767 | 0.0233 | 97.89% | 0.133200 | 0.202100 | 0.00566400 | 0.99770000 | NM_023927       | upstream   | 82233   | Hs.363558 | GRAMD3    |
| rs1386761  | 8  | 89617544  | 0.1444 | 97.19% | 0.139400 | 0.191600 | 0.00567400 | 0.02484000 | NM_003821       | upstream   | 1221629 | Hs.103755 | RIPK2     |
| rs10511151 | 3  | 96496507  | 0.4406 | 97.54% | 1.000000 | 0.536200 | 0.00568000 | 0.06433000 | ENST00000332119 | upstream   | 356949  | ---       | ---       |
| rs9288489  | 2  | 214758120 | 0.0243 | 93.68% | 1.000000 | 1.000000 | 0.00568100 | 0.99730000 | NM_001025436    | intron     | 0       | Hs.705527 | SPAG16    |
| rs4128555  | 7  | 152967375 | 0.4473 | 96.49% | 0.902900 | 0.546200 | 0.00568300 | 0.00848600 | NM_207367       | upstream   | 225394  | ---       | FLJ42291  |
| rs495862   | 11 | 93706705  | 0.3730 | 87.02% | 0.021330 | 0.054430 | 0.00569100 | 0.03666000 | NM_016540       | downstream | 43426   | Hs.272385 | GPR83     |
| rs7692183  | 4  | 85558774  | 0.0989 | 94.04% | 0.304700 | 0.602500 | 0.00572500 | 0.01590000 | NM_006168       | downstream | 74686   | Hs.546270 | NKX6-1    |
| rs870029   | 4  | 189633069 | 0.1101 | 94.04% | 0.340000 | 0.095120 | 0.00573300 | 0.04609000 | NM_178556       | downstream | 327426  | Hs.348618 | TRIML1    |
| rs260454   | 19 | 63458980  | 0.3707 | 92.28% | 0.894800 | 0.530200 | 0.00574600 | 0.04617000 | NM_014480       | intron     | 0       | Hs.438994 | ZNF544    |

|            |    |           |        |        |          |          |            |            |                 |            |         |           |           |
|------------|----|-----------|--------|--------|----------|----------|------------|------------|-----------------|------------|---------|-----------|-----------|
| rs10512610 | 17 | 72085727  | 0.1141 | 92.28% | 0.219300 | 0.205800 | 0.00574800 | 0.01957000 | NM_006456       | intron     | 0       | Hs.592105 | ST6GALNAC |
| rs1480147  | 8  | 16170358  | 0.3159 | 97.19% | 0.334100 | 0.708300 | 0.00575400 | 0.04397000 | NM_138716       | upstream   | 75763   | Hs.147635 | MSR1      |
| rs10508058 | 13 | 100659913 | 0.2883 | 96.14% | 0.007836 | 0.222100 | 0.00577300 | 0.01706000 | NM_052867       | intron     | 0       | Hs.525146 | NALCN     |
| rs7724762  | 5  | 40090135  | 0.4391 | 97.89% | 1.000000 | 0.296400 | 0.00578100 | 0.00790800 | NM_001343       | upstream   | 629432  | Hs.481980 | DAB2      |
| rs10519102 | 15 | 45194506  | 0.4585 | 97.19% | 0.039360 | 0.036460 | 0.00578300 | 0.00306800 | ENST00000381028 | downstream | 18636   | ---       | ---       |
| rs963731   | 2  | 39070377  | 0.1117 | 92.63% | 0.546100 | 0.747400 | 0.00578400 | 0.00902100 | NM_005633       | intron     | 0       | Hs.654397 | SOS1      |
| rs2310160  | 4  | 186427288 | 0.4319 | 97.89% | 0.627100 | 0.636900 | 0.00579800 | 0.00163900 | NM_031953       | intron     | 0       | Hs.369091 | SNX25     |
| rs4135304  | 3  | 12369601  | 0.0240 | 95.09% | 1.000000 | 1.000000 | 0.00581000 | 0.99760000 | NM_005037       | intron     | 0       | Hs.162646 | PPARG     |
| rs10498243 | 2  | 230708466 | 0.3039 | 81.40% | 0.163000 | 0.047560 | 0.00581600 | 0.00455000 | NM_080424       | downstream | 33618   | Hs.145150 | SP110     |
| rs7615571  | 3  | 123148640 | 0.3664 | 97.19% | 0.897000 | 0.755700 | 0.00582800 | 0.00492400 | NM_021082       | downstream | 5493    | Hs.518089 | SLC15A2   |
| rs994580   | 8  | 113029469 | 0.1245 | 94.39% | 0.011090 | 0.007615 | 0.00583500 | 0.02873000 | ENST00000364160 | downstream | 200627  | ---       | ---       |
| rs1423399  | 5  | 41160829  | 0.3773 | 95.79% | 0.606700 | 0.497000 | 0.00584700 | 0.02673000 | NM_000065       | downstream | 17264   | Hs.481992 | C6        |
| rs10487052 | 7  | 86248625  | 0.1679 | 96.14% | 0.384000 | 0.518200 | 0.00585700 | 0.02052000 | NM_000840       | intron     | 0       | Hs.590575 | GRM3      |
| rs10484875 | 6  | 52377895  | 0.1093 | 94.74% | 0.338700 | 0.532800 | 0.00587100 | 0.03335000 | NM_133367       | 3UTR       | 0       | Hs.239388 | PAQR8     |
| rs726646   | 1  | 101711251 | 0.5000 | 96.84% | 0.230100 | 0.452900 | 0.00587400 | 0.01205000 | NM_001400       | downstream | 231589  | Hs.154210 | EDG1      |
| rs1458     | 19 | 39351986  | 0.4946 | 96.84% | 0.148200 | 0.068880 | 0.00587500 | 0.03273000 | NM_015578       | upstream   | 3325    | Hs.407368 | LSM14A    |
| rs1601467  | 8  | 25977183  | 0.2842 | 97.54% | 0.027280 | 0.305400 | 0.00587500 | 0.06109000 | ENST00000380737 | intron     | 0       | ---       | ---       |
| rs3849443  | 3  | 96354919  | 0.4565 | 96.84% | 0.903800 | 0.641500 | 0.00587500 | 0.07639000 | ENST00000332119 | upstream   | 215361  | ---       | ---       |
| rs10508060 | 13 | 100756272 | 0.2667 | 89.47% | 0.076740 | 0.127700 | 0.00589000 | 0.02001000 | NM_052867       | intron     | 0       | Hs.525146 | NALCN     |
| rs7791118  | 7  | 13274540  | 0.2574 | 95.44% | 1.000000 | 0.719000 | 0.00589500 | 0.02725000 | NM_004956       | downstream | 622839  | Hs.22634  | ETV1      |
| rs7009407  | 8  | 107985237 | 0.0396 | 97.54% | 0.351000 | 0.431600 | 0.00590300 | 0.01844000 | NM_139166       | upstream   | 133589  | Hs.374668 | ABRA      |
| rs1419294  | 10 | 8347160   | 0.4728 | 96.84% | 1.000000 | 0.368200 | 0.00590600 | 0.01650000 | NM_002051       | downstream | 189990  | Hs.524134 | GATA3     |
| rs10485712 | 20 | 7044163   | 0.0746 | 94.04% | 0.046370 | 0.343300 | 0.00591700 | 0.02312000 | NM_001200       | downstream | 335253  | Hs.73853  | BMP2      |
| rs828721   | 5  | 162240179 | 0.1598 | 93.33% | 0.645900 | 0.739300 | 0.00593000 | 0.00238100 | NM_199246       | upstream   | 556976  | Hs.79101  | CCNG1     |
| rs2011341  | 4  | 10218108  | 0.0256 | 89.12% | 0.145700 | 0.214300 | 0.00593900 | 0.99750000 | NM_052964       | intron     | 0       | Hs.678910 | MIST      |
| rs2660589  | 4  | 63555481  | 0.1000 | 94.74% | 0.736900 | 1.000000 | 0.00595400 | 0.01371000 | NM_001010874    | downstream | 1272904 | Hs.227752 | SRD5A2L2  |
| rs10505197 | 8  | 114044747 | 0.0394 | 97.89% | 1.000000 | 1.000000 | 0.00597900 | 0.02019000 | NM_052900       | intron     | 0       | Hs.91381  | CSMD3     |
| rs1848864  | 12 | 113984486 | 0.4606 | 97.89% | 0.717600 | 0.877700 | 0.00599300 | 0.03752000 | ENST00000386518 | downstream | 324483  | ---       | ---       |
| rs1079654  | 6  | 132648471 | 0.0932 | 97.89% | 0.275600 | 0.562100 | 0.00599400 | 0.00764800 | NM_001031699    | downstream | 10416   | ---       | MOXD1     |
| rs4669060  | 2  | 6395879   | 0.0932 | 97.89% | 0.146300 | 1.000000 | 0.00599400 | 0.00196100 | NM_001001695    | downstream | 390904  | ---       | FLJ42418  |
| rs8044486  | 16 | 81044043  | 0.1734 | 95.09% | 0.674200 | 0.535700 | 0.00599700 | 0.03272000 | NM_005792       | upstream   | 282730  | Hs.344400 | MPHOSPH6  |
| rs890681   | 2  | 25831991  | 0.2025 | 97.89% | 0.852900 | 0.682300 | 0.00601100 | 0.00291500 | NM_018263       | intron     | 0       | Hs.700650 | ASXL2     |
| rs1364637  | 2  | 218416677 | 0.3195 | 93.33% | 0.322900 | 0.742500 | 0.00602600 | 0.08833000 | NM_022648       | intron     | 0       | Hs.471381 | TNS1      |
| rs1374031  | 5  | 63639566  | 0.2201 | 94.04% | 0.155600 | 0.324200 | 0.00603500 | 0.00803500 | ENST00000389100 | intron     | 0       | ---       | ---       |
| rs275754   | 15 | 37904019  | 0.5000 | 75.44% | 0.055790 | 0.129700 | 0.00604100 | 0.03559000 | NM_007223       | intron     | 0       | Hs.37196  | GPR176    |
| rs953073   | 5  | 85051865  | 0.3208 | 97.89% | 1.000000 | 0.459100 | 0.00605100 | 0.00482800 | ENST00000333189 | downstream | 170341  | ---       | ---       |
| rs6816174  | 4  | 11218802  | 0.4765 | 97.19% | 0.278600 | 0.167300 | 0.00606000 | 0.01723000 | NM_005114       | upstream   | 178315  | Hs.507348 | HS3ST1    |
| rs10521130 | 17 | 4056773   | 0.4819 | 96.84% | 0.546400 | 0.447400 | 0.00606800 | 0.00990000 | NM_020740       | intron     | 0       | Hs.696087 | ANKFY1    |
| rs1396798  | 2  | 69741341  | 0.2518 | 97.54% | 0.635400 | 0.658400 | 0.00607400 | 0.06225000 | ENST00000386230 | upstream   | 6654    | ---       | ---       |
| rs10507918 | 13 | 80774365  | 0.3773 | 97.19% | 0.523300 | 1.000000 | 0.00608900 | 0.00273000 | ENST00000387380 | downstream | 36413   | ---       | ---       |
| rs594516   | 15 | 43722685  | 0.2068 | 97.54% | 1.000000 | 1.000000 | 0.00609000 | 0.01205000 | NM_021199       | intron     | 0       | Hs.511251 | SQRLD     |
| rs3847896  | 12 | 23051233  | 0.4892 | 97.54% | 0.471300 | 0.178000 | 0.00609400 | 0.00116400 | NM_178010       | downstream | 525266  | Hs.657542 | SOX5      |
| rs6684     | 6  | 97445799  | 0.4114 | 89.12% | 0.697500 | 1.000000 | 0.00610500 | 0.05572000 | NM_014165       | CDS        | 0       | Hs.591333 | C6orf66   |
| rs10489869 | 1  | 190782401 | 0.4850 | 93.68% | 0.806500 | 0.649700 | 0.00610600 | 0.02074000 | NM_002922       | upstream   | 29079   | Hs.75256  | RGSI      |
| rs575309   | 4  | 63963215  | 0.1531 | 95.09% | 0.098520 | 0.718600 | 0.00612100 | 0.01313000 | NM_001010874    | downstream | 865170  | Hs.227752 | SRD5A2L2  |
| rs1564032  | 2  | 6446955   | 0.1149 | 91.58% | 0.032070 | 0.613000 | 0.00614400 | 0.00193900 | NM_001001695    | downstream | 339828  | ---       | FLJ42418  |
| rs8027192  | 15 | 69793594  | 0.0695 | 90.88% | 0.111500 | 0.143700 | 0.00615300 | 0.07034000 | NM_024817       | intron     | 0       | Hs.387057 | THSD4     |
| rs10519703 | 5  | 121867356 | 0.1057 | 97.89% | 0.021520 | 0.286100 | 0.00615400 | 0.02663000 | NM_005460       | downstream | 39663   | Hs.426463 | SNCAIP    |
| rs1382061  | 15 | 25430180  | 0.3759 | 97.54% | 0.159300 | 0.440800 | 0.00618500 | 0.01183000 | NM_033223       | intron     | 0       | Hs.569475 | GABRG3    |
| rs1660797  | 10 | 53916144  | 0.0415 | 97.19% | 1.000000 | 1.000000 | 0.00619900 | 0.02651000 | NM_012242       | downstream | 168721  | Hs.40499  | DKK1      |
| rs998125   | 1  | 64984109  | 0.1332 | 80.35% | 0.253400 | 0.642500 | 0.00621700 | 0.01674000 | NM_018211       | intron     | 0       | Hs.591443 | RAVER2    |
| rs9312212  | 4  | 178906882 | 0.3619 | 94.04% | 0.046660 | 0.165300 | 0.00622700 | 0.05214000 | ENST00000365495 | downstream | 167814  | ---       | ---       |
| rs10507917 | 13 | 80741431  | 0.4299 | 95.09% | 0.805300 | 1.000000 | 0.00624900 | 0.00236700 | ENST00000387380 | downstream | 3479    | ---       | ---       |
| rs10506975 | 12 | 88510654  | 0.0412 | 97.89% | 1.000000 | 1.000000 | 0.00625400 | 0.02554000 | NM_001682       | intron     | 0       | Hs.506276 | ATP2B1    |

|            |    |           |        |        |          |          |            |            |                 |            |        |           |          |
|------------|----|-----------|--------|--------|----------|----------|------------|------------|-----------------|------------|--------|-----------|----------|
| rs1733732  | 10 | 53932187  | 0.0412 | 97.89% | 1.000000 | 1.000000 | 0.00625400 | 0.02298000 | NM_012242       | downstream | 184764 | Hs.40499  | DKK1     |
| rs10482860 | 21 | 15116371  | 0.0473 | 96.49% | 0.462000 | 1.000000 | 0.00625800 | 0.00521900 | ENST00000389440 | intron     | 0      | ---       | ---      |
| rs994214   | 2  | 77798750  | 0.3807 | 92.63% | 0.603100 | 0.236700 | 0.00626400 | 0.05168000 | ENST00000386159 | downstream | 49579  | ---       | ---      |
| rs10502250 | 11 | 121908673 | 0.0851 | 96.84% | 0.118800 | 0.467500 | 0.00626800 | 0.01377000 | ENST00000364077 | downstream | 46450  | ---       | ---      |
| rs2175573  | 15 | 45194356  | 0.3407 | 95.79% | 0.014910 | 0.054030 | 0.00627100 | 0.00512200 | ENST00000381028 | downstream | 18786  | ---       | ---      |
| rs1241078  | 18 | 31387808  | 0.0695 | 93.33% | 0.362400 | 0.638000 | 0.00627300 | 0.01593000 | NM_194281       | upstream   | 55855  | Hs.464903 | C18orf37 |
| rs759324   | 16 | 9499204   | 0.1880 | 96.14% | 0.016440 | 0.138440 | 0.00627600 | 0.06363000 | ENST00000363598 | downstream | 66544  | ---       | ---      |
| rs1479640  | 1  | 162214997 | 0.4554 | 94.39% | 0.085010 | 0.756000 | 0.00629300 | 0.06535000 | ENST00000385701 | downstream | 55263  | ---       | ---      |
| rs10509499 | 10 | 86452994  | 0.0817 | 88.07% | 0.015370 | 0.019240 | 0.00631200 | 0.01608000 | NM_018999       | downstream | 184738 | Hs.461988 | KIAA1128 |
| rs9284423  | 18 | 36256475  | 0.2500 | 94.04% | 0.513900 | 0.854500 | 0.00632300 | 0.01185000 | ENST00000364090 | upstream   | 50309  | ---       | ---      |
| rs6988978  | 8  | 13261437  | 0.0885 | 85.26% | 0.411000 | 0.466600 | 0.00632700 | 0.00942800 | NM_024767       | intron     | 0      | Hs.134296 | DLC1     |
| rs851983   | 6  | 152066108 | 0.4121 | 95.79% | 0.708100 | 0.652500 | 0.00632800 | 0.00345100 | NM_025059       | downstream | 82088  | Hs.660044 | C6orf97  |
| rs10516484 | 4  | 103011108 | 0.1296 | 66.32% | 0.004783 | 0.020620 | 0.00633900 | 0.00421400 | NM_017935       | intron     | 0      | Hs.480400 | BANK1    |
| rs1959573  | 14 | 48204884  | 0.0493 | 96.14% | 0.490000 | 0.570900 | 0.00637400 | 0.02284000 | ENST00000384636 | upstream   | 324599 | ---       | ---      |
| rs883398   | 1  | 63261928  | 0.1426 | 94.74% | 0.453600 | 0.607200 | 0.00637700 | 0.05601000 | NM_178221       | downstream | 158156 | Hs.7353   | ATG4C    |
| rs4725680  | 7  | 145064072 | 0.4667 | 94.74% | 0.714500 | 0.282300 | 0.00638500 | 0.00488500 | ENST00000385572 | upstream   | 261282 | ---       | ---      |
| rs10514457 | 16 | 78063502  | 0.0466 | 97.89% | 0.457000 | 1.000000 | 0.00639000 | 0.02599000 | NM_001031804    | downstream | 122234 | Hs.134859 | MAF      |
| rs7017825  | 8  | 108819531 | 0.3309 | 97.54% | 0.223600 | 0.521500 | 0.00640200 | 0.00523800 | NM_001146       | upstream   | 240072 | Hs.369675 | ANGPT1   |
| rs10517999 | 4  | 169665396 | 0.0698 | 92.98% | 1.000000 | 0.304600 | 0.00640300 | 0.02526000 | NM_016081       | intron     | 0      | Hs.151220 | PALLD    |
| rs9317845  | 13 | 69240293  | 0.1563 | 95.44% | 0.644400 | 0.333200 | 0.00640600 | 0.03389000 | NM_020866       | intron     | 0      | Hs.508201 | KLHL1    |
| rs1417696  | 6  | 63795895  | 0.3903 | 97.54% | 0.377900 | 0.096070 | 0.00640800 | 0.00278400 | ENST00000356170 | upstream   | 183526 | ---       | ---      |
| rs4128784  | 4  | 30481748  | 0.0848 | 97.19% | 0.427000 | 0.111300 | 0.00640800 | 0.02596000 | NM_032457       | intron     | 0      | Hs.570785 | PCDH7    |
| rs7560607  | 2  | 64807513  | 0.0578 | 94.04% | 0.006973 | 1.000000 | 0.00641200 | 0.03096000 | NM_014755       | upstream   | 72963  | Hs.693696 | SERTAD2  |
| rs9327287  | 5  | 122547512 | 0.3950 | 91.93% | 0.518600 | 0.641800 | 0.00641400 | 0.03555000 | ENST00000261364 | intron     | 0      | ---       | ---      |
| rs10485510 | 20 | 33908578  | 0.1004 | 94.39% | 0.737700 | 1.000000 | 0.00641800 | 0.01250000 | NM_016436       | intron     | 0      | Hs.517044 | PHF20    |
| rs10501129 | 11 | 33376740  | 0.4611 | 94.74% | 0.624500 | 0.440100 | 0.00642300 | 0.01158000 | NM_005734       | downstream | 45050  | Hs.201918 | HIPK3    |
| rs6531074  | 2  | 16408444  | 0.2814 | 81.05% | 0.142200 | 0.824300 | 0.00642800 | 0.02846000 | ENST00000388035 | downstream | 164399 | ---       | ---      |
| rs10519389 | 2  | 230151820 | 0.0605 | 89.82% | 1.000000 | 1.000000 | 0.00643400 | 0.00574700 | NM_139072       | intron     | 0      | Hs.234074 | DNER     |
| rs1155642  | 15 | 95303615  | 0.3967 | 96.84% | 0.615100 | 0.869200 | 0.00643700 | 0.00605400 | ENST00000364271 | downstream | 116985 | ---       | ---      |
| rs1343870  | 14 | 51430563  | 0.1855 | 89.82% | 0.678000 | 1.000000 | 0.00644400 | 0.00203500 | NM_053064       | intron     | 0      | Hs.705393 | GNG2     |
| rs10483430 | 14 | 32711870  | 0.3794 | 88.77% | 1.000000 | 0.388800 | 0.00645300 | 0.01460000 | NM_022123       | intron     | 0      | Hs.659456 | NPAS3    |
| rs10514276 | 5  | 85449460  | 0.1685 | 97.89% | 0.391000 | 0.648800 | 0.00646500 | 0.06344000 | ENST00000380134 | upstream   | 164558 | ---       | ---      |
| rs2504939  | 6  | 160752140 | 0.1934 | 96.14% | 0.846000 | 0.576400 | 0.00646700 | 0.01200000 | NM_021977       | intron     | 0      | Hs.567337 | SLC22A3  |
| rs10493147 | 4  | 128956949 | 0.1493 | 97.54% | 1.000000 | 1.000000 | 0.00648600 | 0.09988000 | NM_014278       | intron     | 0      | Hs.135554 | HSPA4L   |
| rs10516016 | 5  | 165911472 | 0.0424 | 95.09% | 1.000000 | 1.000000 | 0.00648600 | 0.01228000 | ENST00000320147 | downstream | 169285 | ---       | ---      |
| rs10511468 | 9  | 7377977   | 0.1705 | 90.53% | 0.124600 | 0.059890 | 0.00650600 | 0.05293000 | NM_015061       | downstream | 212329 | Hs.157106 | JMJD2C   |
| rs3091599  | 20 | 39830225  | 0.1709 | 97.54% | 0.673700 | 0.489500 | 0.00655600 | 0.03130000 | NM_007050       | downstream | 304581 | Hs.526879 | PTPRT    |
| rs39745    | 7  | 117492493 | 0.0964 | 96.49% | 0.089330 | 0.724800 | 0.00657200 | 0.06776000 | NM_016200       | upstream   | 118962 | Hs.657737 | LSM8     |
| rs1508250  | 6  | 87171740  | 0.1531 | 90.53% | 0.000428 | 0.010450 | 0.00657700 | 0.09215000 | ENST00000388670 | upstream   | 30546  | ---       | ---      |
| rs10488453 | 7  | 134056142 | 0.3878 | 85.96% | 0.007008 | 0.052400 | 0.00658300 | 0.00616400 | NM_199186       | downstream | 41037  | Hs.198365 | BPGM     |
| rs268870   | 2  | 65337053  | 0.2356 | 97.54% | 0.506200 | 0.480000 | 0.00658700 | 0.00833000 | NM_005722       | intron     | 0      | Hs.699451 | ACTR2    |
| rs2652072  | 5  | 134767194 | 0.1316 | 93.33% | 1.000000 | 1.000000 | 0.00658900 | 0.05088000 | NM_001040158    | upstream   | 3718   | Hs.696013 | H2AFY    |
| rs702844   | 5  | 89410835  | 0.3400 | 96.49% | 0.893600 | 0.718300 | 0.00658900 | 0.00178100 | NM_004365       | downstream | 314452 | Hs.591767 | CETN3    |
| rs1531575  | 13 | 80759483  | 0.3935 | 97.19% | 0.615000 | 1.000000 | 0.00659100 | 0.00264100 | ENST00000387380 | downstream | 21531  | ---       | ---      |
| rs17581017 | 13 | 100452590 | 0.0971 | 97.54% | 0.305800 | 0.310700 | 0.00660100 | 0.00972000 | NM_052867       | downstream | 51539  | Hs.525146 | NALCN    |
| rs3134171  | 8  | 100593748 | 0.3516 | 95.79% | 0.287900 | 0.034210 | 0.00660100 | 0.03236000 | NM_017890       | intron     | 0      | Hs.191540 | VPS13B   |
| rs460136   | 5  | 129204786 | 0.0873 | 96.49% | 0.135700 | 0.019540 | 0.00661300 | 0.00927000 | NM_175856       | upstream   | 63636  | Hs.213137 | CHSY-2   |
| rs10483167 | 22 | 31655803  | 0.2876 | 67.72% | 0.112700 | 0.159300 | 0.00662400 | 0.00524400 | NM_133633       | intron     | 0      | Hs.658998 | SYN3     |
| rs1829684  | 1  | 166125505 | 0.1423 | 93.68% | 0.448700 | 1.000000 | 0.00662700 | 0.00719700 | NM_018417       | intron     | 0      | Hs.320892 | SAC      |
| rs667419   | 5  | 131309963 | 0.3170 | 92.98% | 0.010250 | 0.020030 | 0.00662900 | 0.00824700 | ENST00000296869 | intron     | 0      | ---       | ---      |
| rs4525555  | 17 | 42692948  | 0.2394 | 90.88% | 0.087170 | 0.445200 | 0.00664100 | 0.03366000 | NM_000212       | intron     | 0      | Hs.218040 | ITGB3    |
| rs769039   | 5  | 121872093 | 0.2815 | 94.74% | 0.175700 | 0.153200 | 0.00665100 | 0.09607000 | NM_005460       | downstream | 44400  | Hs.426463 | SNCAIP   |
| rs31319    | 5  | 123642159 | 0.1455 | 94.04% | 1.000000 | 1.000000 | 0.00665400 | 0.02454000 | NM_020747       | downstream | 358350 | Hs.266616 | ZNF608   |
| rs648097   | 1  | 18542037  | 0.2852 | 94.74% | 0.136200 | 1.000000 | 0.00666200 | 0.02613000 | NM_032880       | intron     | 0      | Hs.212511 | IGSF21   |

|            |    |           |        |        |          |          |            |            |                 |            |         |           |          |
|------------|----|-----------|--------|--------|----------|----------|------------|------------|-----------------|------------|---------|-----------|----------|
| rs10504509 | 8  | 72634113  | 0.0684 | 82.11% | 0.014510 | 0.237700 | 0.00666700 | 0.03310000 | NM_172059       | upstream   | 197092  | Hs.491997 | EYA1     |
| rs233598   | 21 | 27252709  | 0.1624 | 95.09% | 0.657400 | 0.479300 | 0.00670600 | 0.04186000 | NM_007038       | intron     | 0       | Hs.58324  | ADAMTS5  |
| rs3935969  | 17 | 63312421  | 0.3004 | 97.54% | 0.886500 | 0.845800 | 0.00672100 | 0.03394000 | NM_004459       | intron     | 0       | Hs.444200 | BPTF     |
| rs1836541  | 15 | 60649430  | 0.2978 | 97.19% | 0.116000 | 0.064080 | 0.00673200 | 0.04330000 | NM_015059       | upstream   | 77372   | Hs.569438 | TLN2     |
| rs3898762  | 18 | 9565419   | 0.1868 | 92.98% | 1.000000 | 1.000000 | 0.00673300 | 0.00352300 | NM_005134       | intron     | 0       | Hs.464595 | PP4R1    |
| rs4799697  | 18 | 29263749  | 0.2914 | 93.33% | 0.104500 | 0.172600 | 0.00673300 | 0.02957000 | NM_198995       | intron     | 0       | Hs.115461 | C18orf34 |
| rs1604355  | 1  | 188725630 | 0.1097 | 97.54% | 1.000000 | 0.608900 | 0.00679400 | 0.02761000 | NM_199051       | upstream   | 12248   | Hs.65765  | FAM5C    |
| rs1339658  | 10 | 20737858  | 0.3392 | 79.65% | 0.102400 | 0.695300 | 0.00681700 | 0.01176000 | NM_032812       | downstream | 128566  | Hs.658134 | PLXDC2   |
| rs2616231  | 8  | 20613527  | 0.3491 | 96.49% | 0.508500 | 0.860400 | 0.00682400 | 0.00658600 | ENST00000387608 | upstream   | 96810   | ---       | ---      |
| rs2389530  | 13 | 95348755  | 0.4572 | 94.39% | 0.462700 | 0.347100 | 0.00683200 | 0.01857000 | NM_020121       | intron     | 0       | Hs.193226 | UGCGL2   |
| rs261861   | 1  | 239162199 | 0.4805 | 89.82% | 0.213300 | 0.280800 | 0.00683400 | 0.00173500 | NM_002924       | intron     | 0       | Hs.655739 | RGS7     |
| rs1400131  | 2  | 183709600 | 0.3000 | 96.49% | 0.084110 | 0.612900 | 0.00683600 | 0.01862000 | NM_001008544    | intron     | 0       | ---       | NUP35    |
| rs1428504  | 5  | 164770559 | 0.2198 | 95.79% | 0.214600 | 0.554200 | 0.00684300 | 0.00306800 | ENST00000385732 | upstream   | 198465  | ---       | ---      |
| rs234443   | 14 | 96980650  | 0.2357 | 92.28% | 0.395700 | 1.000000 | 0.00687900 | 0.00278500 | NM_003384       | downstream | 562947  | Hs.422662 | VRK1     |
| rs7922744  | 10 | 107572127 | 0.0500 | 94.74% | 1.000000 | 1.000000 | 0.00688300 | 0.00944900 | NM_001013031    | downstream | 754842  | Hs.591915 | SORCS1   |
| rs9304435  | 18 | 48670227  | 0.0500 | 94.74% | 1.000000 | 1.000000 | 0.00688300 | 0.01522000 | NM_005215       | intron     | 0       | Hs.579550 | DCC      |
| rs2575710  | 8  | 97653152  | 0.4218 | 96.49% | 0.901700 | 1.000000 | 0.00689600 | 0.02297000 | NM_002998       | intron     | 0       | Hs.1501   | SDC2     |
| rs10508616 | 10 | 20502090  | 0.1458 | 95.09% | 0.137900 | 0.707700 | 0.00689800 | 0.00681300 | NM_032812       | intron     | 0       | Hs.658134 | PLXDC2   |
| rs2367979  | 10 | 26020563  | 0.2305 | 94.39% | 0.605400 | 0.810000 | 0.00694800 | 0.04039000 | NM_020752       | downstream | 89402   | Hs.499108 | GPR158   |
| rs10496139 | 2  | 67116647  | 0.1913 | 97.19% | 0.699900 | 1.000000 | 0.00695600 | 0.01903000 | NM_019002       | upstream   | 361299  | Hs.353022 | ETAA1    |
| rs1445442  | 12 | 63577561  | 0.3040 | 97.54% | 0.046420 | 0.134600 | 0.00696600 | 0.00437300 | ENST00000229088 | downstream | 19211   | ---       | ---      |
| rs958404   | 7  | 133247726 | 0.3004 | 97.54% | 0.256200 | 0.619000 | 0.00696900 | 0.02887000 | NM_001037126    | intron     | 0       | Hs.321273 | EXOC4    |
| rs4603704  | 2  | 143033654 | 0.0758 | 97.19% | 0.660700 | 0.676500 | 0.00697200 | 0.00586300 | NM_001032998    | upstream   | 318011  | Hs.470126 | KYNU     |
| rs1972326  | 5  | 90461165  | 0.0141 | 87.37% | 1.000000 | 1.000000 | 0.00697400 | 0.06541000 | NM_032119       | intron     | 0       | Hs.591777 | GPR98    |
| rs2181302  | 13 | 105842361 | 0.4004 | 93.33% | 0.609200 | 0.760500 | 0.00697800 | 0.03170000 | ENST00000310792 | upstream   | 33761   | ---       | ---      |
| rs577953   | 1  | 109897420 | 0.0850 | 88.77% | 0.401700 | 0.414100 | 0.00697900 | 0.00502800 | NM_006496       | intron     | 0       | Hs.73799  | GNAI3    |
| rs9308871  | 2  | 104033366 | 0.2907 | 94.74% | 0.554800 | 1.000000 | 0.00699700 | 0.00353700 | NM_144632       | downstream | 1233056 | Hs.436203 | TMEM182  |
| rs6438689  | 3  | 123148392 | 0.2384 | 97.89% | 0.068790 | 1.000000 | 0.00700100 | 0.00198500 | NM_021082       | downstream | 5245    | Hs.518089 | SLC15A2  |
| rs890945   | 5  | 157924801 | 0.2882 | 71.23% | 0.232000 | 0.081610 | 0.00700200 | 0.01409000 | NM_024007       | downstream | 133896  | Hs.657753 | EBF1     |
| rs3923935  | 1  | 219509198 | 0.3447 | 92.63% | 0.220300 | 0.519700 | 0.00702900 | 0.06145000 | NM_001010913    | downstream | 60847   | ---       | ---      |
| rs10491511 | 9  | 103219769 | 0.0769 | 95.79% | 0.663900 | 0.679600 | 0.00706300 | 0.03064000 | NM_000035       | downstream | 2912    | Hs.530274 | ALDOB    |
| rs334357   | 9  | 100949574 | 0.1808 | 95.09% | 0.216400 | 0.180800 | 0.00706800 | 0.00649900 | NM_004612       | intron     | 0       | Hs.494622 | TGFBF1   |
| rs1409298  | 10 | 92088003  | 0.0309 | 90.88% | 1.000000 | 1.000000 | 0.00707000 | 0.03948000 | ENST00000387911 | upstream   | 174306  | ---       | ---      |
| rs10489284 | 1  | 170633685 | 0.1757 | 96.84% | 1.000000 | 0.823700 | 0.00708200 | 0.04464000 | NM_015569       | intron     | 0       | Hs.654775 | DNM3     |
| rs285047   | 13 | 97555091  | 0.0706 | 94.39% | 0.032060 | 0.331800 | 0.00708300 | 0.14730000 | NM_001001715    | upstream   | 38344   | Hs.403917 | FARF1    |
| rs724201   | 12 | 70242280  | 0.4173 | 97.54% | 0.805400 | 0.293000 | 0.00710700 | 0.00492300 | NM_003667       | intron     | 0       | Hs.658889 | LGR5     |
| rs2247166  | 12 | 89185397  | 0.2410 | 97.54% | 0.138300 | 0.261300 | 0.00711600 | 0.01965000 | ENST00000388111 | downstream | 540467  | ---       | ---      |
| rs968432   | 20 | 4690282   | 0.0136 | 90.18% | 1.000000 | 1.000000 | 0.00712400 | 0.02608000 | NM_170774       | downstream | 18387   | Hs.631504 | RASSF2   |
| rs10519856 | 5  | 125201023 | 0.2315 | 94.74% | 0.608300 | 1.000000 | 0.00713200 | 0.01681000 | NM_023927       | upstream   | 585977  | Hs.363558 | GRAMD3   |
| rs10518144 | 4  | 77256055  | 0.2281 | 80.00% | 0.258000 | 0.531700 | 0.00718300 | 0.00509200 | NM_017426       | intron     | 0       | Hs.430435 | NUP54    |
| rs4129221  | 3  | 29367167  | 0.2419 | 97.89% | 0.329300 | 0.165000 | 0.00720300 | 0.03768000 | NM_001003792    | intron     | 0       | Hs.696468 | RBMS3    |
| rs10484613 | 6  | 99587626  | 0.0709 | 94.04% | 0.032460 | 0.333400 | 0.00720700 | 0.01522000 | NM_012160       | upstream   | 85056   | Hs.536850 | FBXL4    |
| rs7319671  | 13 | 36923224  | 0.4135 | 93.33% | 0.800400 | 1.000000 | 0.00720700 | 0.00062650 | NM_006475       | downstream | 111502  | Hs.136348 | POSTN    |
| rs1445324  | 11 | 26991184  | 0.3989 | 93.68% | 0.702700 | 0.740300 | 0.00720800 | 0.03391000 | NM_203371       | downstream | 15978   | Hs.705612 | FIBIN    |
| rs1882375  | 2  | 170447886 | 0.3421 | 80.00% | 0.306700 | 0.116800 | 0.00721000 | 0.04024000 | NM_172070       | upstream   | 45628   | ---       | UBR3     |
| rs4252894  | 4  | 78196595  | 0.1213 | 82.46% | 1.000000 | 0.614100 | 0.00721300 | 0.00204600 | NM_006835       | intron     | 0       | Hs.518827 | CCNI     |
| rs452582   | 9  | 10089873  | 0.4722 | 94.74% | 0.465800 | 0.215100 | 0.00722000 | 0.00124500 | ENST00000363183 | downstream | 657521  | ---       | ---      |
| rs1114967  | 14 | 20257888  | 0.3076 | 97.54% | 0.888000 | 0.850200 | 0.00723600 | 0.02763000 | NM_194430       | downstream | 19291   | ---       | RNASE4   |
| rs10275018 | 7  | 27475922  | 0.4048 | 88.42% | 0.513300 | 1.000000 | 0.00724000 | 0.02531000 | NM_152740       | downstream | 55666   | Hs.406758 | HIBADH   |
| rs1667638  | 8  | 100749076 | 0.2805 | 86.32% | 0.017650 | 0.009842 | 0.00724100 | 0.04040000 | NM_017890       | intron     | 0       | Hs.191540 | VPS13B   |
| rs184461   | 18 | 36538715  | 0.1481 | 94.74% | 0.332000 | 0.798800 | 0.00725500 | 0.00824800 | NM_002647       | upstream   | 1250482 | Hs.464971 | PK3C3    |
| rs1822202  | 15 | 60599740  | 0.4826 | 90.53% | 0.620000 | 0.443800 | 0.00729000 | 0.02530000 | NM_015059       | upstream   | 127062  | Hs.569438 | TLN2     |
| rs9294584  | 6  | 94742375  | 0.4384 | 96.84% | 0.902700 | 1.000000 | 0.00732600 | 0.02095000 | ENST00000364082 | downstream | 96709   | ---       | ---      |
| rs1825754  | 8  | 100574413 | 0.3513 | 97.89% | 0.358500 | 0.053480 | 0.00732800 | 0.04643000 | NM_017890       | intron     | 0       | Hs.191540 | VPS13B   |

|            |    |           |        |        |          |          |            |            |                 |            |        |           |           |
|------------|----|-----------|--------|--------|----------|----------|------------|------------|-----------------|------------|--------|-----------|-----------|
| rs10516485 | 4  | 102971488 | 0.0260 | 94.39% | 0.159300 | 1.000000 | 0.00733200 | 0.01176000 | NM_017935       | intron     | 0      | Hs.480400 | BANK1     |
| rs9308363  | 16 | 84481566  | 0.4094 | 92.98% | 0.446200 | 0.249600 | 0.00733500 | 0.03355000 | NM_002163       | upstream   | 8709   | Hs.137427 | IRF8      |
| rs7948646  | 11 | 84463639  | 0.2754 | 96.84% | 0.880400 | 0.401100 | 0.00734100 | 0.00909200 | ENST00000376104 | intron     | 0      | ---       | ---       |
| rs4131826  | 1  | 159549008 | 0.3082 | 97.89% | 0.888700 | 0.849900 | 0.00737800 | 0.05682000 | NM_000530       | upstream   | 2646   | Hs.591486 | MPZ       |
| rs1899727  | 15 | 50927337  | 0.0935 | 91.93% | 0.000510 | 0.000439 | 0.00738000 | 0.04198000 | NM_004498       | upstream   | 57836  | Hs.658573 | ONECUT1   |
| rs1013997  | 11 | 91957013  | 0.1534 | 92.63% | 1.000000 | 0.299000 | 0.00739500 | 0.01629000 | ENST00000298047 | intron     | 0      | ---       | ---       |
| rs10517685 | 4  | 159252777 | 0.0372 | 94.39% | 0.043470 | 1.000000 | 0.00739600 | 0.01461000 | NM_016613       | downstream | 15232  | Hs.567498 | C4orf18   |
| rs10508850 | 10 | 36950870  | 0.2757 | 92.28% | 0.440100 | 1.000000 | 0.00741100 | 0.01022000 | ENST00000384541 | downstream | 4081   | ---       | ---       |
| rs2073515  | 6  | 16767140  | 0.0130 | 94.74% | 1.000000 | 1.000000 | 0.00741100 | 0.00286600 | NM_000332       | intron     | 0      | Hs.434961 | ATXN1     |
| rs729453   | 9  | 22681708  | 0.4938 | 84.56% | 0.001915 | 0.053940 | 0.00741700 | 0.03282000 | NM_022160       | downstream | 239236 | Hs.371976 | DMRTA1    |
| rs10488172 | 7  | 132985716 | 0.3858 | 89.12% | 0.146000 | 0.301100 | 0.00743900 | 0.01133000 | NM_001037126    | intron     | 0      | Hs.321273 | EXOC4     |
| rs2333467  | 4  | 177593682 | 0.1953 | 97.89% | 0.570900 | 1.000000 | 0.00746100 | 0.12210000 | NM_021928       | downstream | 106344 | Hs.421194 | SPCS3     |
| rs10490607 | 2  | 21372683  | 0.1264 | 97.19% | 0.169600 | 0.222900 | 0.00746600 | 0.04159000 | ENST00000317039 | upstream   | 152662 | ---       | ---       |
| rs9307199  | 4  | 77970671  | 0.3272 | 95.44% | 0.411900 | 0.199100 | 0.00748500 | 0.00184800 | NM_020859       | downstream | 50705  | Hs.702168 | SHROOM3   |
| rs505974   | 3  | 191389467 | 0.2108 | 94.04% | 0.141500 | 0.434800 | 0.00748700 | 0.01268000 | NM_021101       | downstream | 116730 | Hs.439060 | CLDN1     |
| rs1150078  | 6  | 111666994 | 0.4728 | 96.84% | 0.053000 | 0.359600 | 0.00749000 | 0.01580000 | NM_018593       | downstream | 15156  | Hs.591327 | SLC16A10  |
| rs9320930  | 6  | 123724727 | 0.3700 | 95.79% | 0.363700 | 0.730400 | 0.00750700 | 0.00295700 | NM_006073       | intron     | 0      | Hs.654601 | TRDN      |
| rs39061    | 7  | 29222789  | 0.4093 | 94.74% | 0.256900 | 0.332300 | 0.00750800 | 0.00885000 | NM_004067       | intron     | 0      | Hs.654611 | CHN2      |
| rs3922878  | 16 | 85412205  | 0.2303 | 80.00% | 0.851700 | 0.599500 | 0.00757800 | 0.00956400 | NM_005250       | downstream | 239409 | Hs.533830 | FOXLI     |
| rs477086   | 5  | 131312509 | 0.3212 | 96.14% | 0.211800 | 0.259000 | 0.00758500 | 0.00637900 | ENST00000296869 | intron     | 0      | ---       | ---       |
| rs1459320  | 8  | 21181308  | 0.2849 | 90.53% | 0.067050 | 0.414300 | 0.00761300 | 0.02489000 | ENST00000387614 | upstream   | 318944 | ---       | ---       |
| rs1344870  | 3  | 21282405  | 0.3566 | 85.61% | 0.026110 | 0.043130 | 0.00763400 | 0.00119700 | ENST00000295509 | upstream   | 140119 | ---       | ---       |
| rs4924292  | 15 | 36793190  | 0.4345 | 93.68% | 1.000000 | 1.000000 | 0.00764100 | 0.02822000 | NM_207444       | downstream | 13659  | Hs.448785 | C15orf53  |
| rs4710239  | 6  | 63789613  | 0.3697 | 91.58% | 0.594900 | 0.205200 | 0.00765200 | 0.00174800 | ENST00000356170 | upstream   | 189808 | ---       | ---       |
| rs7841308  | 8  | 59092187  | 0.0865 | 91.23% | 1.000000 | 1.000000 | 0.00765200 | 0.02296000 | NM_147189       | intron     | 0      | Hs.154652 | FAM110B   |
| rs1331905  | 9  | 28390284  | 0.4307 | 93.68% | 0.709300 | 0.874000 | 0.00765800 | 0.01982000 | NM_152570       | intron     | 0      | Hs.699432 | LINGO2    |
| rs7947527  | 11 | 5975218   | 0.4964 | 96.49% | 0.809400 | 0.762600 | 0.00766700 | 0.05513000 | NM_001005179    | downstream | 4639   | Hs.553571 | OR56A4    |
| rs1820677  | 5  | 134079303 | 0.0663 | 97.89% | 0.618300 | 1.000000 | 0.00767000 | 0.05152000 | ENST00000265341 | intron     | 0      | ---       | ---       |
| rs251170   | 5  | 62062829  | 0.1614 | 88.07% | 0.244700 | 0.137100 | 0.00767500 | 0.00133600 | NM_016338       | downstream | 103928 | Hs.482269 | IPO11     |
| rs2199862  | 4  | 58437185  | 0.1343 | 94.04% | 0.287600 | 0.174100 | 0.00767900 | 0.03654000 | ENST00000387903 | upstream   | 383889 | ---       | ---       |
| rs2135046  | 5  | 170034318 | 0.3615 | 97.54% | 0.242200 | 0.120200 | 0.00768700 | 0.05982000 | NM_001034838    | intron     | 0      | Hs.484111 | KCNIP1    |
| rs2355723  | 2  | 170890612 | 0.1804 | 89.47% | 0.523200 | 0.129200 | 0.00769200 | 0.02532000 | NM_138995       | intron     | 0      | Hs.671900 | MYO3B     |
| rs1387434  | 8  | 118472448 | 0.3582 | 94.04% | 0.144100 | 0.213300 | 0.00769600 | 0.00769400 | NM_080651       | upstream   | 129763 | Hs.492612 | MED30     |
| rs10489058 | 4  | 15967050  | 0.0940 | 93.33% | 0.000634 | 0.003573 | 0.00770300 | 0.00500600 | NM_152684       | downstream | 127667 | ---       | FLJ39653  |
| rs10501715 | 11 | 89599131  | 0.1367 | 93.68% | 0.437000 | 0.173100 | 0.00771700 | 0.01180000 | NM_012124       | upstream   | 3304   | Hs.22857  | CHORDC1   |
| rs7579207  | 2  | 115598322 | 0.3075 | 92.98% | 0.885300 | 0.440100 | 0.00772300 | 0.26990000 | NM_001004360    | upstream   | 37949  | Hs.591555 | DPP10     |
| rs9295647  | 6  | 25201412  | 0.1624 | 95.09% | 0.500800 | 1.000000 | 0.00773600 | 0.01847000 | ENST00000377993 | intron     | 0      | ---       | ---       |
| rs10504744 | 8  | 82952758  | 0.3563 | 94.04% | 1.000000 | 0.727100 | 0.00774000 | 0.01931000 | NM_152837       | upstream   | 35768  | Hs.492121 | SNX16     |
| rs1991488  | 5  | 125189097 | 0.4745 | 96.49% | 0.809300 | 0.878400 | 0.00775600 | 0.00537100 | NM_023927       | upstream   | 597903 | Hs.363558 | GRAMD3    |
| rs10494898 | 1  | 206664604 | 0.1129 | 97.89% | 0.367900 | 0.754300 | 0.00775900 | 0.06269000 | NM_025179       | upstream   | 180316 | Hs.497626 | PLXNA2    |
| rs10498235 | 2  | 229824279 | 0.1352 | 94.74% | 0.294100 | 0.266300 | 0.00777200 | 0.01185000 | NM_017933       | intron     | 0      | Hs.409352 | PID1      |
| rs1455158  | 2  | 138490108 | 0.3071 | 93.68% | 0.313300 | 0.333700 | 0.00777700 | 0.00979800 | NM_006895       | 3UTR       | 0      | Hs.421151 | HNMT      |
| rs2332283  | 14 | 69827532  | 0.1601 | 97.54% | 1.000000 | 0.177200 | 0.00778300 | 0.02256000 | NM_016468       | downstream | 34323  | Hs.443661 | C14orf112 |
| rs731700   | 14 | 58334879  | 0.4600 | 96.49% | 0.715600 | 1.000000 | 0.00778600 | 0.01991000 | NM_014992       | upstream   | 390273 | Hs.654934 | DAAM1     |
| rs2868134  | 4  | 82235245  | 0.1748 | 79.30% | 0.103300 | 0.045300 | 0.00778900 | 0.07371000 | NM_006259       | intron     | 0      | Hs.570833 | PRKG2     |
| rs1374122  | 2  | 4776973   | 0.0288 | 97.54% | 1.000000 | 1.000000 | 0.00779200 | 0.00759700 | ENST00000387792 | downstream | 75493  | ---       | ---       |
| rs10520436 | 4  | 180956420 | 0.2294 | 89.47% | 0.004013 | 0.005309 | 0.00780100 | 0.12870000 | ENST00000385763 | downstream | 686534 | ---       | ---       |
| rs1974307  | 13 | 103517148 | 0.4257 | 94.39% | 0.384600 | 0.750300 | 0.00780500 | 0.00622500 | NM_000452       | upstream   | 999951 | Hs.194783 | SLC10A2   |
| rs3925061  | 4  | 27819126  | 0.1888 | 84.56% | 0.000563 | 0.025580 | 0.00781000 | 0.00883100 | ENST00000387335 | upstream   | 502793 | ---       | ---       |
| rs7118119  | 11 | 84465202  | 0.2798 | 97.19% | 0.765300 | 0.539200 | 0.00781300 | 0.00780700 | ENST00000376104 | intron     | 0      | ---       | ---       |
| rs6956693  | 7  | 145069659 | 0.1807 | 96.14% | 0.839200 | 1.000000 | 0.00782400 | 0.00746300 | ENST00000385572 | upstream   | 255695 | ---       | ---       |
| rs10491773 | 9  | 14462090  | 0.0535 | 95.09% | 0.546600 | 1.000000 | 0.00782600 | 0.00877100 | NM_178566       | downstream | 143440 | Hs.649522 | ZDHHC21   |
| rs10497355 | 2  | 170582455 | 0.3682 | 97.19% | 1.000000 | 0.440700 | 0.00783200 | 0.02012000 | NM_172070       | intron     | 0      | ---       | UBR3      |
| rs4471302  | 1  | 170633760 | 0.1792 | 97.89% | 0.839500 | 1.000000 | 0.00786300 | 0.04698000 | NM_015569       | intron     | 0      | Hs.654775 | DNM3      |

|            |    |           |        |        |          |          |            |            |                 |            |         |           |           |
|------------|----|-----------|--------|--------|----------|----------|------------|------------|-----------------|------------|---------|-----------|-----------|
| rs10508753 | 10 | 30293881  | 0.0130 | 94.74% | 1.000000 | 1.000000 | 0.00787900 | 0.02373000 | NM_021738       | upstream   | 329974  | Hs.499209 | SVIL      |
| rs1980892  | 1  | 193060259 | 0.4568 | 93.33% | 0.009576 | 0.060340 | 0.00788900 | 0.08949000 | NM_198503       | downstream | 1401277 | Hs.657046 | KCNT2     |
| rs243027   | 2  | 60460511  | 0.4766 | 97.54% | 0.399700 | 0.551200 | 0.00790600 | 0.00160200 | ENST00000363937 | upstream   | 4733    | ---       | ---       |
| rs9313729  | 5  | 175195244 | 0.1807 | 87.37% | 0.204200 | 0.095530 | 0.00790800 | 0.03731000 | NM_001008220    | intron     | 0       | Hs.193235 | CPLX2     |
| rs1455157  | 2  | 138490222 | 0.3104 | 94.39% | 0.393400 | 0.449200 | 0.00792100 | 0.01098000 | NM_006895       | 3UTR       | 0       | Hs.42151  | HNMT      |
| rs1380703  | 2  | 57794791  | 0.3225 | 96.84% | 0.782700 | 0.852700 | 0.00794000 | 0.01593000 | NM_006296       | upstream   | 332433  | Hs.631890 | VRK2      |
| rs10496491 | 2  | 115836547 | 0.2883 | 96.14% | 0.555600 | 0.417100 | 0.00794400 | 0.04808000 | NM_001004360    | intron     | 0       | Hs.591555 | DPP10     |
| rs10494572 | 1  | 182250203 | 0.2518 | 97.54% | 0.749900 | 0.585800 | 0.00796900 | 0.04427000 | NM_015101       | intron     | 0       | Hs.387995 | GLT25D2   |
| rs9327369  | 5  | 125247640 | 0.1989 | 97.89% | 0.261400 | 0.273000 | 0.00798400 | 0.04165000 | NM_023927       | upstream   | 539360  | Hs.363558 | GRAMD3    |
| rs1500737  | 10 | 57503439  | 0.4720 | 94.04% | 0.541800 | 0.294100 | 0.00798600 | 0.01213000 | NM_001005413    | downstream | 284471  | Hs.591363 | ZWINT     |
| rs759572   | 12 | 96007166  | 0.4352 | 94.74% | 0.264700 | 0.097470 | 0.00799500 | 0.01622000 | ENST00000365498 | upstream   | 109628  | ---       | ---       |
| rs1332966  | 1  | 168553373 | 0.2527 | 97.19% | 0.055020 | 0.660000 | 0.00800200 | 0.02074000 | NM_152281       | upstream   | 214521  | Hs.183702 | SCYL1BP1  |
| rs323744   | 5  | 86861304  | 0.3760 | 86.32% | 0.343200 | 0.595900 | 0.00800400 | 0.02545000 | NM_153354       | downstream | 665477  | Hs.379972 | TMEM161B  |
| rs10506132 | 12 | 37690866  | 0.3297 | 96.84% | 0.415400 | 0.715800 | 0.00800600 | 0.01426000 | NM_153634       | upstream   | 105166  | Hs.40910  | CPNE8     |
| rs325815   | 5  | 41157377  | 0.3800 | 96.49% | 1.000000 | 0.236900 | 0.00800700 | 0.02167000 | NM_000065       | downstream | 20716   | Hs.481992 | C6        |
| rs334958   | 3  | 18585681  | 0.2248 | 97.54% | 0.226800 | 0.329700 | 0.00801600 | 0.00500600 | NM_002971       | upstream   | 130473  | Hs.517717 | SATB1     |
| rs601441   | 5  | 131312332 | 0.3231 | 97.19% | 0.170000 | 0.142700 | 0.00802100 | 0.00525600 | ENST00000296869 | intron     | 0       | ---       | ---       |
| rs952506   | 4  | 102201934 | 0.2222 | 97.89% | 0.728500 | 0.846300 | 0.00804100 | 0.00659900 | NM_000944       | intron     | 0       | Hs.435512 | PPP3CA    |
| rs1562489  | 3  | 135888563 | 0.2390 | 88.07% | 0.117500 | 0.175700 | 0.00805700 | 0.00110700 | NM_178554       | upstream   | 36009   | Hs.146730 | KY        |
| rs1952863  | 14 | 97967839  | 0.1092 | 91.58% | 0.099160 | 0.074530 | 0.00806700 | 0.01015000 | NM_182560       | upstream   | 279864  | Hs.448754 | C14orf177 |
| rs2860940  | 2  | 77154619  | 0.3556 | 94.74% | 0.506300 | 0.435900 | 0.00807900 | 0.00488100 | NM_024993       | intron     | 0       | Hs.285782 | LRRMT4    |
| rs1595423  | 2  | 78182256  | 0.0771 | 88.77% | 0.009362 | 0.012060 | 0.00808200 | 0.01427000 | ENST00000325094 | downstream | 311166  | ---       | ---       |
| rs340686   | 5  | 8440200   | 0.2183 | 94.04% | 0.281100 | 0.548400 | 0.00808200 | 0.04058000 | ENST00000387188 | downstream | 232017  | ---       | ---       |
| rs10515849 | 5  | 162538010 | 0.3746 | 97.89% | 0.007060 | 0.014150 | 0.00808300 | 0.03881000 | NM_199246       | upstream   | 259145  | Hs.79101  | CCNG1     |
| rs2044673  | 9  | 22697790  | 0.4748 | 97.54% | 0.228700 | 0.878700 | 0.00808800 | 0.01933000 | NM_022160       | downstream | 255318  | Hs.371976 | DMRTA1    |
| rs7724015  | 5  | 160137590 | 0.1029 | 97.19% | 0.750300 | 1.000000 | 0.00808900 | 0.01072000 | ENST00000327245 | intron     | 0       | ---       | ---       |
| rs2392727  | 8  | 128148778 | 0.3614 | 87.37% | 0.040210 | 0.420600 | 0.00809600 | 0.00274300 | ENST00000385818 | downstream | 395697  | ---       | ---       |
| rs2689138  | 1  | 237079798 | 0.1370 | 94.74% | 0.126100 | 0.426400 | 0.00809700 | 0.08397000 | NM_000740       | upstream   | 779214  | Hs.7138   | CHRM3     |
| rs10500376 | 16 | 10591252  | 0.0744 | 91.93% | 0.158500 | 0.657500 | 0.00811600 | 0.05851000 | NM_001424       | upstream   | 9212    | Hs.655130 | EMP2      |
| rs1468322  | 17 | 65314774  | 0.1900 | 95.09% | 0.845800 | 1.000000 | 0.00813300 | 0.05391000 | NM_002758       | downstream | 263707  | Hs.463978 | MAP2K6    |
| rs311365   | 19 | 52162376  | 0.4424 | 94.39% | 0.620800 | 0.271300 | 0.00814600 | 0.01219000 | NM_004491       | intron     | 0       | Hs.509447 | GRLF1     |
| rs810123   | 13 | 104121974 | 0.0302 | 92.98% | 1.000000 | 1.000000 | 0.00816300 | 0.03131000 | NM_172370       | upstream   | 794619  | Hs.381382 | DAOA      |
| rs7077278  | 10 | 901291    | 0.1973 | 91.58% | 0.246500 | 0.157700 | 0.00817400 | 0.09677000 | NM_015155       | intron     | 0       | Hs.705392 | LARP5     |
| rs6975590  | 7  | 54443549  | 0.2185 | 94.74% | 0.032480 | 0.164300 | 0.00820400 | 0.01424000 | NM_182546       | upstream   | 134086  | Hs.335933 | VSTM2A    |
| rs10494643 | 1  | 189036417 | 0.2148 | 94.74% | 0.010450 | 0.107900 | 0.00820600 | 0.03774000 | NM_199051       | upstream   | 323035  | Hs.65765  | FAM5C     |
| rs1327990  | 6  | 4259879   | 0.2019 | 91.23% | 0.120800 | 0.523900 | 0.00822500 | 0.04344000 | ENST00000363028 | upstream   | 86118   | ---       | ---       |
| rs10501714 | 11 | 89593029  | 0.1643 | 97.19% | 0.025600 | 0.003822 | 0.00823100 | 0.03719000 | NM_012124       | intron     | 0       | Hs.22857  | CHORDC1   |
| rs10503122 | 18 | 64600521  | 0.0252 | 97.54% | 0.154400 | 1.000000 | 0.00825800 | 0.06613000 | NM_024781       | upstream   | 15829   | Hs.280781 | CCDC102B  |
| rs2253624  | 17 | 67243676  | 0.0135 | 90.88% | 0.040230 | 1.000000 | 0.00826600 | 0.07774000 | ENST00000334565 | downstream | 114504  | ---       | ---       |
| rs8060446  | 16 | 81043837  | 0.1729 | 94.39% | 0.670300 | 0.535700 | 0.00827100 | 0.04382000 | NM_005792       | upstream   | 282524  | Hs.344400 | MPHOSPH6  |
| rs1393516  | 3  | 59418742  | 0.2077 | 95.44% | 0.585700 | 1.000000 | 0.00828400 | 0.00545700 | NM_002012       | downstream | 294250  | Hs.655995 | FHIT      |
| rs4128166  | 9  | 120331586 | 0.4635 | 91.23% | 0.900900 | 0.349500 | 0.00829800 | 0.00682700 | NM_014618       | downstream | 637143  | Hs.532316 | DBC1      |
| rs1368086  | 2  | 43818511  | 0.2967 | 95.79% | 0.020930 | 0.326500 | 0.00830800 | 0.01322000 | NM_172069       | intron     | 0       | Hs.164162 | PLEKHH2   |
| rs810134   | 13 | 31658874  | 0.2656 | 89.82% | 0.056190 | 0.203300 | 0.00831100 | 0.03033000 | NM_023037       | intron     | 0       | Hs.591225 | FRY       |
| rs10497117 | 2  | 153431463 | 0.4428 | 95.09% | 0.141900 | 0.278200 | 0.00833500 | 0.00962400 | NM_152522       | downstream | 105526  | Hs.516468 | ARL6IP6   |
| rs684080   | 4  | 74978908  | 0.3856 | 82.81% | 0.274800 | 0.490600 | 0.00836300 | 0.02631000 | NM_001511       | downstream | 10659   | Hs.789    | CXCL1     |
| rs10503847 | 8  | 29450387  | 0.2036 | 88.77% | 0.243400 | 0.199200 | 0.00839000 | 0.02633000 | ENST00000385149 | downstream | 114596  | ---       | ---       |
| rs1423417  | 5  | 41175549  | 0.3788 | 92.63% | 1.000000 | 0.236700 | 0.00839400 | 0.06758000 | NM_000065       | downstream | 2544    | Hs.481992 | C6        |
| rs2216081  | 2  | 64805405  | 0.0701 | 97.54% | 0.006223 | 0.328600 | 0.00842000 | 0.02977000 | NM_014755       | upstream   | 70855   | Hs.693696 | SERTAD2   |
| rs6776964  | 3  | 190787296 | 0.4225 | 95.09% | 0.171200 | 0.222300 | 0.00844600 | 0.01486000 | NM_003722       | upstream   | 44614   | Hs.137569 | TP63      |
| rs10508570 | 10 | 19228576  | 0.0963 | 94.74% | 0.286400 | 1.000000 | 0.00845000 | 0.03487000 | NM_178815       | downstream | 221630  | Hs.25362  | ARL5B     |
| rs10491833 | 9  | 24710232  | 0.1896 | 94.39% | 0.169400 | 0.376700 | 0.00845500 | 0.00625200 | ENST00000380098 | upstream   | 175997  | ---       | ---       |
| rs1224703  | 6  | 58511977  | 0.4373 | 89.47% | 0.202900 | 0.283100 | 0.00846900 | 0.00572700 | NM_206908       | upstream   | 116322  | ---       | GUSBL2    |
| rs10502714 | 18 | 34744797  | 0.0921 | 97.19% | 0.713400 | 0.562100 | 0.00848100 | 0.01020000 | NM_020180       | upstream   | 1344856 | Hs.435976 | BRUNOL4   |

|            |    |           |        |        |          |          |            |            |                 |            |         |           |           |
|------------|----|-----------|--------|--------|----------|----------|------------|------------|-----------------|------------|---------|-----------|-----------|
| rs1793696  | 8  | 118393066 | 0.3083 | 88.77% | 0.142400 | 0.173100 | 0.00849200 | 0.08381000 | NM_173851       | downstream | 134935  | Hs.532270 | SLC30A8   |
| rs1865235  | 2  | 173975594 | 0.1313 | 97.54% | 0.440200 | 0.576700 | 0.00850100 | 0.02619000 | NM_145810       | downstream | 33629   | Hs.470654 | CDCA7     |
| rs794143   | 4  | 110172663 | 0.4686 | 95.09% | 0.010570 | 0.169300 | 0.00851400 | 0.00785700 | NM_032518       | intron     | 0       | Hs.658842 | COL25A1   |
| rs1820008  | 5  | 165267267 | 0.0251 | 97.89% | 1.000000 | 1.000000 | 0.00851500 | 0.01358000 | ENST00000385726 | downstream | 297596  | ---       | ---       |
| rs10493858 | 1  | 92060525  | 0.1318 | 97.19% | 0.797500 | 0.781000 | 0.00853100 | 0.02461000 | NM_003243       | intron     | 0       | Hs.482390 | TGFBF3    |
| rs3887137  | 9  | 106738433 | 0.1352 | 94.74% | 0.294100 | 0.413900 | 0.00853300 | 0.02735000 | NM_005502       | upstream   | 8094    | Hs.429294 | ABCA1     |
| rs923887   | 11 | 96543926  | 0.2292 | 97.19% | 0.397300 | 0.813300 | 0.00854300 | 0.01455000 | ENST00000362445 | upstream   | 489748  | ---       | ---       |
| rs7725707  | 5  | 81866327  | 0.1158 | 90.88% | 0.357500 | 0.620000 | 0.00854900 | 0.04903000 | NM_010139779    | downstream | 148236  | ---       | FLJ41309  |
| rs1014313  | 8  | 90096817  | 0.3327 | 97.54% | 0.501300 | 0.585900 | 0.00855100 | 0.01269000 | NM_003821       | upstream   | 742356  | Hs.103755 | RIPK2     |
| rs10490881 | 3  | 190178441 | 0.0132 | 93.33% | 0.039170 | 1.000000 | 0.00856700 | 0.06022000 | NM_005578       | downstream | 103480  | Hs.444362 | LPP       |
| rs10493158 | 1  | 51787780  | 0.0746 | 94.04% | 0.169100 | 0.203600 | 0.00856900 | 0.12090000 | NM_148909       | upstream   | 67346   | Hs.21938  | OSBPL9    |
| rs717827   | 2  | 40351005  | 0.3989 | 97.19% | 0.706800 | 0.628300 | 0.00857000 | 0.01756000 | NM_021097       | intron     | 0       | Hs.468274 | SLC8A1    |
| rs4783222  | 16 | 81140611  | 0.3927 | 91.58% | 0.605200 | 0.158600 | 0.00857500 | 0.01103000 | NM_001257       | upstream   | 308849  | Hs.654386 | CDH13     |
| rs1601468  | 8  | 25977411  | 0.2151 | 95.44% | 0.371800 | 1.000000 | 0.00858200 | 0.12280000 | ENST00000380737 | intron     | 0       | ---       | ---       |
| rs275737   | 15 | 37966305  | 0.1980 | 85.96% | 0.014380 | 0.145800 | 0.00859000 | 0.03199000 | NM_007223       | intron     | 0       | Hs.37196  | GPR176    |
| rs10494506 | 1  | 176266337 | 0.1720 | 87.72% | 0.181600 | 0.743200 | 0.00859100 | 0.00280100 | ENST00000308284 | intron     | 0       | ---       | ---       |
| rs10484611 | 6  | 99451405  | 0.0699 | 97.89% | 0.034130 | 0.328600 | 0.00860100 | 0.01696000 | NM_012160       | intron     | 0       | Hs.536850 | FBXL4     |
| rs6807625  | 3  | 20808822  | 0.1846 | 97.89% | 0.691300 | 0.770500 | 0.00861800 | 0.00894800 | ENST00000384080 | upstream   | 284570  | ---       | ---       |
| rs1454796  | 8  | 115768911 | 0.1985 | 93.68% | 0.847800 | 0.831500 | 0.00861900 | 0.10390000 | NM_014112       | downstream | 725060  | Hs.657018 | TRPS1     |
| rs7069064  | 10 | 58104365  | 0.2068 | 97.54% | 0.042460 | 0.038910 | 0.00862100 | 0.09252000 | NM_001005414    | upstream   | 313325  | ---       | ZWINT     |
| rs10506868 | 10 | 114309370 | 0.0252 | 97.54% | 0.154400 | 1.000000 | 0.00866300 | 0.03300000 | NM_145206       | intron     | 0       | Hs.194554 | VTI1A     |
| rs6758008  | 2  | 56564993  | 0.4188 | 95.09% | 0.901100 | 1.000000 | 0.00866400 | 0.00457900 | NM_006296       | upstream   | 1562231 | Hs.631890 | VRK2      |
| rs3764131  | 13 | 48721288  | 0.2898 | 92.63% | 0.374100 | 0.686700 | 0.00868300 | 0.04240000 | NM_030911       | intron     | 0       | Hs.388220 | CDADC1    |
| rs10508087 | 13 | 101918278 | 0.1853 | 97.54% | 0.321900 | 0.248600 | 0.00869200 | 0.00785600 | NM_175929       | upstream   | 66122   | Hs.696392 | FGF14     |
| rs10512976 | 5  | 8722512   | 0.0401 | 91.93% | 0.341100 | 1.000000 | 0.00870200 | 0.01649000 | NM_003966       | downstream | 373497  | Hs.27621  | SEMA5A    |
| rs9309078  | 2  | 42103394  | 0.1435 | 83.16% | 0.013450 | 0.087680 | 0.00871400 | 0.00937100 | NM_138370       | upstream   | 25863   | Hs.408542 | LOC91461  |
| rs10483671 | 14 | 56135072  | 0.0787 | 89.12% | 0.055040 | 0.067090 | 0.00872600 | 0.04941000 | NM_017799       | intron     | 0       | Hs.497253 | C14orf101 |
| rs10492461 | 13 | 29430661  | 0.0746 | 94.04% | 0.169100 | 1.000000 | 0.00872600 | 0.01322000 | NM_001010918    | downstream | 8036    | ---       | LOC440131 |
| rs10493371 | 1  | 65018226  | 0.1241 | 94.74% | 0.577800 | 1.000000 | 0.00873200 | 0.01448000 | NM_018211       | intron     | 0       | Hs.591443 | RAVER2    |
| rs2244882  | 13 | 34774714  | 0.1697 | 96.14% | 1.000000 | 0.814400 | 0.00873700 | 0.03954000 | NM_015678       | intron     | 0       | Hs.491172 | NBEA      |
| rs10491478 | 5  | 179301894 | 0.4066 | 95.79% | 1.000000 | 0.443500 | 0.00873800 | 0.14720000 | NM_018434       | downstream | 13217   | Hs.484363 | RNF130    |
| rs1934511  | 1  | 161733144 | 0.1974 | 95.09% | 1.000000 | 0.673700 | 0.00874100 | 0.08994000 | ENST00000385703 | upstream   | 12754   | ---       | ---       |
| rs10493028 | 1  | 26425508  | 0.0630 | 94.74% | 0.609300 | 1.000000 | 0.00875300 | 0.00689500 | NM_022778       | upstream   | 7772    | Hs.63795  | CCDC21    |
| rs4799431  | 18 | 32558105  | 0.4757 | 93.68% | 0.623900 | 1.000000 | 0.00875700 | 0.00779900 | NM_025135       | intron     | 0       | Hs.436636 | FHOD3     |
| rs10508059 | 13 | 100730832 | 0.2681 | 82.46% | 0.045970 | 0.020280 | 0.00876400 | 0.04411000 | NM_052867       | intron     | 0       | Hs.525146 | NALCN     |
| rs2371231  | 5  | 65725859  | 0.1190 | 95.79% | 0.778500 | 0.539800 | 0.00877300 | 0.06933000 | NM_001001703    | downstream | 75850   | ---       | FLJ46010  |
| rs10497760 | 2  | 196017708 | 0.2005 | 65.61% | 0.005148 | 0.086330 | 0.00877800 | 0.01121000 | ENST00000365336 | upstream   | 69299   | ---       | ---       |
| rs17797113 | 4  | 56475111  | 0.0351 | 84.91% | 0.252500 | 0.329400 | 0.00878300 | 0.02352000 | NM_001024924    | downstream | 9110    | Hs.269665 | EXOC1     |
| rs131      | 7  | 24905412  | 0.3874 | 91.93% | 0.435900 | 0.637200 | 0.00878600 | 0.05288000 | NM_145321       | intron     | 0       | Hs.520259 | OSBPL3    |
| rs6748458  | 2  | 98132982  | 0.1496 | 96.14% | 0.091180 | 0.716700 | 0.00880300 | 0.08970000 | NM_144992       | intron     | 0       | Hs.269977 | VWA3B     |
| rs1354757  | 4  | 135996282 | 0.4795 | 94.04% | 0.273700 | 1.000000 | 0.00885200 | 0.03006000 | ENST00000384459 | downstream | 459743  | ---       | ---       |
| rs4672212  | 2  | 57546267  | 0.1448 | 90.88% | 0.078460 | 0.233800 | 0.00886500 | 0.00233200 | NM_006296       | upstream   | 580957  | Hs.631890 | VRK2      |
| rs10490072 | 2  | 60523435  | 0.1649 | 97.89% | 0.131500 | 0.055910 | 0.00888000 | 0.05713000 | NM_138553       | downstream | 8371    | ---       | BCL11A    |
| rs10512281 | 9  | 103207574 | 0.0809 | 97.54% | 0.695400 | 1.000000 | 0.00888100 | 0.02732000 | NM_197977       | intron     | 0       | Hs.50123  | ZNF189    |
| rs2898455  | 8  | 18031292  | 0.3271 | 94.39% | 0.026340 | 0.141000 | 0.00888100 | 0.03600000 | NM_004315       | upstream   | 44535   | Hs.527412 | ASAH1     |
| rs728366   | 11 | 123539663 | 0.2874 | 91.58% | 0.033390 | 0.030400 | 0.00888300 | 0.00779000 | ENST00000355343 | downstream | 4651    | ---       | ---       |
| rs1983453  | 4  | 57903149  | 0.3345 | 97.54% | 0.224600 | 0.029340 | 0.00888500 | 0.04412000 | NM_001553       | upstream   | 231841  | Hs.479808 | IGFBP7    |
| rs10493369 | 1  | 64994244  | 0.1245 | 94.39% | 0.270300 | 0.664100 | 0.00889500 | 0.01619000 | NM_018211       | intron     | 0       | Hs.591443 | RAVER2    |
| rs4944558  | 11 | 85507515  | 0.2345 | 96.49% | 0.738800 | 1.000000 | 0.00890700 | 0.02717000 | ENST00000387875 | downstream | 24532   | ---       | ---       |
| rs10515813 | 5  | 159960260 | 0.0742 | 82.81% | 1.000000 | 1.000000 | 0.00892100 | 0.01846000 | ENST00000327245 | intron     | 0       | ---       | ---       |
| rs10519101 | 15 | 45194109  | 0.3467 | 96.14% | 0.062200 | 0.151900 | 0.00892100 | 0.00387000 | ENST00000381028 | downstream | 19033   | ---       | ---       |
| rs1975974  | 17 | 21631187  | 0.1791 | 94.04% | 1.000000 | 0.501600 | 0.00895000 | 0.03284000 | ENST00000344561 | upstream   | 22813   | ---       | ---       |
| rs10496383 | 2  | 104334920 | 0.0897 | 91.93% | 0.445200 | 0.156800 | 0.00895900 | 0.02140000 | NM_144632       | downstream | 1534610 | Hs.436203 | TMEM182   |
| rs10507416 | 13 | 33279750  | 0.3806 | 94.04% | 0.092450 | 0.000710 | 0.00896400 | 0.02669000 | NM_181558       | upstream   | 10484   | Hs.115474 | RFC3      |

|            |    |           |        |        |          |          |            |            |                 |            |         |           |           |
|------------|----|-----------|--------|--------|----------|----------|------------|------------|-----------------|------------|---------|-----------|-----------|
| rs1337788  | 13 | 97318472  | 0.2293 | 84.91% | 0.000972 | 0.203000 | 0.00897900 | 0.03271000 | NM_021033       | downstream | 400229  | Hs.508480 | RAP2A     |
| rs6097963  | 20 | 52452442  | 0.0921 | 97.19% | 0.265700 | 1.000000 | 0.00897900 | 0.01554000 | NM_018431       | upstream   | 73146   | Hs.656582 | DOK5      |
| rs2213980  | 7  | 90227582  | 0.1470 | 97.89% | 1.000000 | 0.299600 | 0.00898000 | 0.01376000 | NM_012395       | intron     | 0       | Hs.430742 | PFTK1     |
| rs1113478  | 13 | 88908389  | 0.4212 | 91.23% | 0.097630 | 0.022040 | 0.00899600 | 0.00838800 | ENST00000298437 | upstream   | 96599   | ---       | ---       |
| rs360384   | 2  | 126837248 | 0.0809 | 97.54% | 0.695400 | 1.000000 | 0.00900600 | 0.05764000 | NM_016815       | upstream   | 327296  | Hs.59138  | GYPC      |
| rs1553251  | 15 | 67236901  | 0.3007 | 96.84% | 0.045490 | 0.240200 | 0.00904400 | 0.01752000 | NM_015554       | upstream   | 3126    | Hs.183006 | GLCE      |
| rs10517628 | 4  | 157113913 | 0.1511 | 97.54% | 1.000000 | 0.476200 | 0.00906600 | 0.00998800 | NM_001334       | upstream   | 19415   | Hs.75262  | CTSO      |
| rs10492609 | 13 | 31228179  | 0.2537 | 94.04% | 0.035180 | 0.043380 | 0.00909100 | 0.04202000 | NM_130806       | intron     | 0       | Hs.680763 | RXFP2     |
| rs10508272 | 10 | 4046871   | 0.0315 | 94.74% | 0.228800 | 0.298600 | 0.00912100 | 0.05554000 | NM_001300       | upstream   | 229404  | Hs.4055   | KLF6      |
| rs659793   | 11 | 109191077 | 0.0315 | 94.74% | 0.228800 | 0.298600 | 0.00912100 | 0.08205000 | NM_207645       | downstream | 389459  | Hs.172982 | LOC399947 |
| rs965158   | 8  | 107564094 | 0.0315 | 94.74% | 1.000000 | 1.000000 | 0.00912100 | 0.07557000 | NM_181354       | upstream   | 175176  | Hs.148778 | OXR1      |
| rs9300636  | 13 | 100362458 | 0.4610 | 94.39% | 0.087400 | 0.120600 | 0.00914000 | 0.00128000 | NM_052867       | downstream | 141671  | Hs.525146 | NALCN     |
| rs1283694  | 8  | 108481118 | 0.1864 | 97.89% | 0.692100 | 0.772100 | 0.00914500 | 0.00271500 | NM_001146       | intron     | 0       | Hs.369675 | ANGPT1    |
| rs10497941 | 2  | 211667103 | 0.2243 | 92.28% | 0.859100 | 1.000000 | 0.00915000 | 0.11090000 | NM_001042599    | downstream | 289482  | Hs.390729 | ERBB4     |
| rs10499149 | 6  | 129425863 | 0.1149 | 91.58% | 0.058010 | 0.120900 | 0.00917400 | 0.00856200 | NM_000426       | intron     | 0       | Hs.200841 | LAMA2     |
| rs6060578  | 20 | 33768859  | 0.0914 | 97.89% | 0.487900 | 0.562100 | 0.00918300 | 0.01390000 | NM_184241       | intron     | 0       | ---       | RBM39     |
| rs2056698  | 12 | 111053486 | 0.2841 | 95.09% | 0.456400 | 0.548100 | 0.00922000 | 0.00510400 | NM_006700       | intron     | 0       | Hs.5148   | TRAFD1    |
| rs6570896  | 6  | 149134450 | 0.2717 | 96.84% | 0.022470 | 0.014450 | 0.00922000 | 0.01941000 | NM_005715       | intron     | 0       | Hs.657370 | UST       |
| rs10507340 | 13 | 24185174  | 0.0725 | 96.84% | 0.158500 | 1.000000 | 0.00922300 | 0.30750000 | NM_001676       | downstream | 1265    | Hs.147111 | ATP12A    |
| rs1710506  | 2  | 2497383   | 0.4170 | 97.19% | 0.536300 | 0.650800 | 0.00922900 | 0.03113000 | NM_015025       | upstream   | 183331  | Hs.434418 | MYT1L     |
| rs10497464 | 2  | 177644761 | 0.1039 | 97.89% | 1.000000 | 0.286100 | 0.00923300 | 0.05446000 | ENST00000385460 | upstream   | 66927   | ---       | ---       |
| rs10512498 | 17 | 58507111  | 0.0314 | 95.09% | 1.000000 | 1.000000 | 0.00924300 | 0.02413000 | ENST00000384821 | downstream | 131706  | ---       | ---       |
| rs300330   | 5  | 152702916 | 0.1426 | 94.74% | 0.317900 | 0.133900 | 0.00925800 | 0.01053000 | NM_000827       | upstream   | 147583  | Hs.519693 | GRIA1     |
| rs10483305 | 14 | 25626745  | 0.3506 | 91.58% | 0.417300 | 0.522000 | 0.00926500 | 0.00591100 | ENST00000384946 | downstream | 84467   | ---       | ---       |
| rs10500773 | 11 | 13128803  | 0.3996 | 94.39% | 0.799900 | 0.743800 | 0.00929000 | 0.01071000 | ENST00000386734 | upstream   | 113244  | ---       | ---       |
| rs10484386 | 6  | 22223919  | 0.0387 | 95.09% | 1.000000 | 1.000000 | 0.00933100 | 0.00895400 | ENST00000378559 | upstream   | 5430    | ---       | ---       |
| rs4879613  | 9  | 32727092  | 0.0387 | 95.09% | 0.051910 | 1.000000 | 0.00933100 | 0.01545000 | NM_212558       | upstream   | 46904   | Hs.522063 | LOC401498 |
| rs6890756  | 5  | 62147584  | 0.1209 | 97.19% | 0.149200 | 0.368600 | 0.00933700 | 0.05169000 | ENST00000381087 | upstream   | 2785    | ---       | ---       |
| rs6844637  | 4  | 113967887 | 0.3459 | 97.89% | 0.233900 | 0.434300 | 0.00934500 | 0.02202000 | ENST00000341244 | CDS        | 0       | ---       | ---       |
| rs1410093  | 13 | 72736628  | 0.4783 | 88.77% | 0.077850 | 0.272100 | 0.00936100 | 0.01002000 | NM_007249       | downstream | 421522  | Hs.373857 | KLF12     |
| rs6938452  | 6  | 107071417 | 0.3992 | 88.77% | 0.012610 | 0.162500 | 0.00937000 | 0.01354000 | NM_001624       | intron     | 0       | Hs.643590 | AIM1      |
| rs10485714 | 20 | 7085322   | 0.0335 | 94.39% | 0.254700 | 0.333400 | 0.00937300 | 0.05868000 | NM_001200       | downstream | 376395  | Hs.73853  | BMP2      |
| rs7127817  | 11 | 112131896 | 0.3030 | 92.63% | 0.188900 | 0.128500 | 0.00938400 | 0.01033000 | ENST00000388431 | upstream   | 77972   | ---       | ---       |
| rs10497624 | 2  | 183777265 | 0.0963 | 94.74% | 0.024400 | 0.079880 | 0.00939000 | 0.04231000 | NM_001008544    | downstream | 42615   | ---       | NUP35     |
| rs1440564  | 4  | 67883036  | 0.0858 | 94.04% | 1.000000 | 1.000000 | 0.00939100 | 0.06252000 | ENST00000383902 | downstream | 94869   | ---       | ---       |
| rs10496133 | 2  | 66454940  | 0.0429 | 85.96% | 0.360700 | 0.439600 | 0.00939600 | 0.01895000 | NM_002398       | upstream   | 61096   | Hs.526754 | MEIS1     |
| rs3892760  | 5  | 168946565 | 0.0199 | 96.84% | 0.096590 | 0.148000 | 0.00939700 | 0.99760000 | NM_017785       | intron     | 0       | Hs.368710 | CCDC99    |
| rs1417693  | 6  | 63800373  | 0.3727 | 95.09% | 0.037120 | 0.004745 | 0.00940100 | 0.00573700 | ENST00000356170 | upstream   | 179048  | ---       | ---       |
| rs10503664 | 8  | 19646975  | 0.0646 | 95.09% | 0.611700 | 0.615500 | 0.00940500 | 0.00403100 | NM_018371       | upstream   | 62423   | Hs.655166 | ChGn      |
| rs1114626  | 5  | 21269294  | 0.0197 | 97.89% | 1.000000 | 1.000000 | 0.00942400 | 0.99770000 | NM_004934       | upstream   | 1245198 | Hs.317632 | CDH18     |
| rs10519705 | 5  | 121884370 | 0.0174 | 90.88% | 1.000000 | 1.000000 | 0.00943400 | 0.09500000 | NM_005460       | downstream | 56677   | Hs.426463 | SNCAIP    |
| rs10496141 | 2  | 67116762  | 0.1888 | 97.54% | 1.000000 | 1.000000 | 0.00944300 | 0.02531000 | NM_019002       | upstream   | 361184  | Hs.353022 | ETAA1     |
| rs1395867  | 2  | 189236054 | 0.0883 | 93.33% | 0.131900 | 0.452700 | 0.00945600 | 0.01599000 | NM_016315       | downstream | 68023   | Hs.470887 | GULP1     |
| rs661592   | 7  | 42919011  | 0.2490 | 89.47% | 1.000000 | 0.821100 | 0.00945800 | 0.01801000 | NM_024054       | upstream   | 829     | Hs.214247 | C7orf25   |
| rs4485440  | 18 | 34728093  | 0.0949 | 96.14% | 0.720000 | 0.573100 | 0.00946600 | 0.01098000 | NM_020180       | upstream   | 1328152 | Hs.435976 | BRUNOL4   |
| rs2077683  | 5  | 65683206  | 0.4122 | 97.89% | 0.537300 | 0.748600 | 0.00946700 | 0.09019000 | NM_001001703    | downstream | 33197   | ---       | FLJ46010  |
| rs2804284  | 9  | 582757    | 0.3302 | 94.04% | 0.128000 | 0.190900 | 0.00946700 | 0.01019000 | NM_015158       | intron     | 0       | Hs.306764 | ANKRD15   |
| rs241473   | 1  | 49545039  | 0.3390 | 93.68% | 0.784600 | 0.857400 | 0.00947500 | 0.05091000 | ENST00000334103 | intron     | 0       | ---       | ---       |
| rs4672995  | 2  | 221727827 | 0.0877 | 94.04% | 0.129100 | 0.235100 | 0.00948000 | 0.03728000 | NM_004438       | downstream | 263166  | Hs.371218 | EPHA4     |
| rs200144   | 6  | 143385348 | 0.1111 | 94.74% | 0.219800 | 0.206100 | 0.00949300 | 0.02704000 | NM_016108       | upstream   | 38358   | Hs.567501 | AIG1      |
| rs714256   | 6  | 99558442  | 0.0871 | 92.63% | 0.118700 | 0.127400 | 0.00950800 | 0.00510600 | NM_012160       | upstream   | 55872   | Hs.536850 | FBXL4     |
| rs2035831  | 3  | 175166485 | 0.2048 | 79.65% | 0.038990 | 0.039900 | 0.00951100 | 0.09133000 | NM_014932       | intron     | 0       | Hs.478289 | NLGN1     |
| rs7561527  | 2  | 59956272  | 0.1076 | 88.07% | 1.000000 | 1.000000 | 0.00951300 | 0.01358000 | ENST00000386566 | downstream | 180782  | ---       | ---       |
| rs2141859  | 12 | 103424111 | 0.4455 | 96.49% | 0.625200 | 0.438500 | 0.00952000 | 0.00526400 | NM_018413       | intron     | 0       | Hs.17569  | CHST11    |



|            |    |           |        |        |          |          |            |            |                 |            |         |           |          |
|------------|----|-----------|--------|--------|----------|----------|------------|------------|-----------------|------------|---------|-----------|----------|
| rs544283   | 5  | 39913976  | 0.3811 | 92.98% | 0.516400 | 0.493100 | 0.00952100 | 0.01568000 | NM_001343       | upstream   | 453273  | Hs.481980 | DAB2     |
| rs10508748 | 10 | 30297356  | 0.0126 | 97.54% | 1.000000 | 1.000000 | 0.00952300 | 0.02449000 | NM_021738       | upstream   | 333449  | Hs.499209 | SVIL     |
| rs10491156 | 17 | 50544682  | 0.0389 | 94.74% | 1.000000 | 1.000000 | 0.00955900 | 0.02886000 | NM_178509       | intron     | 0       | Hs.35199  | STXBP4   |
| rs10495496 | 2  | 4242708   | 0.0389 | 94.74% | 1.000000 | 1.000000 | 0.00955900 | 0.03208000 | ENST00000382050 | downstream | 513207  | ---       | ---      |
| rs10493724 | 1  | 82945162  | 0.1654 | 93.33% | 0.662900 | 0.520200 | 0.00958700 | 0.01987000 | NM_012302       | downstream | 714467  | Hs.24212  | LPHN2    |
| rs727989   | 7  | 86251533  | 0.1397 | 95.44% | 0.038850 | 0.228600 | 0.00959000 | 0.01527000 | NM_000840       | intron     | 0       | Hs.590575 | GRM3     |
| rs7781966  | 7  | 76385939  | 0.4176 | 97.89% | 0.902700 | 0.227800 | 0.00959200 | 0.03839000 | NM_152992       | upstream   | 291440  | Hs.488877 | POMZP3   |
| rs7707528  | 5  | 83572343  | 0.2169 | 95.44% | 0.720500 | 0.419800 | 0.00960100 | 0.00510100 | NM_005711       | intron     | 0       | Hs.482730 | EDIL3    |
| rs993736   | 2  | 83617449  | 0.2708 | 97.19% | 0.446300 | 0.480000 | 0.00960100 | 0.00972000 | ENST00000362425 | upstream   | 120921  | ---       | ---      |
| rs10483814 | 14 | 68125552  | 0.0870 | 94.74% | 1.000000 | 1.000000 | 0.00960700 | 0.04015000 | NM_133509       | intron     | 0       | Hs.172587 | RAD51L1  |
| rs442553   | 5  | 89355622  | 0.3402 | 93.33% | 0.891800 | 0.468600 | 0.00961000 | 0.00577500 | NM_004365       | downstream | 369665  | Hs.591767 | CETN3    |
| rs2278913  | 2  | 39053384  | 0.0852 | 94.74% | 0.704100 | 0.697300 | 0.00961100 | 0.00197400 | NM_005633       | downstream | 13085   | Hs.654397 | SOS1     |
| rs7931910  | 11 | 109749455 | 0.0852 | 94.74% | 1.000000 | 1.000000 | 0.00961100 | 0.01186000 | NM_004109       | upstream   | 56349   | Hs.744    | FDX1     |
| rs866096   | 1  | 221654438 | 0.1551 | 96.14% | 0.818200 | 1.000000 | 0.00961700 | 0.00831000 | NM_152610       | downstream | 19003   | Hs.192090 | C1orf65  |
| rs10496699 | 2  | 133693475 | 0.4278 | 97.19% | 0.623300 | 0.547200 | 0.00963900 | 0.02347000 | NM_207481       | intron     | 0       | Hs.537329 | NAP5     |
| rs9311594  | 3  | 56107690  | 0.1079 | 97.54% | 0.539700 | 1.000000 | 0.00964300 | 0.02712000 | NM_015576       | intron     | 0       | Hs.476389 | ERC2     |
| rs150948   | 14 | 69605873  | 0.0545 | 93.33% | 0.173100 | 0.215400 | 0.00965200 | 0.01459000 | NM_182936       | intron     | 0       | Hs.337696 | SLC8A3   |
| rs2466025  | 8  | 128258556 | 0.3370 | 94.74% | 1.000000 | 1.000000 | 0.00965500 | 0.00237400 | ENST00000377972 | downstream | 453154  | ---       | ---      |
| rs1877771  | 6  | 163238470 | 0.4767 | 90.53% | 0.453700 | 0.345700 | 0.00965800 | 0.03807000 | NM_152410       | intron     | 0       | Hs.25791  | PACRG    |
| rs1556541  | 13 | 37203414  | 0.4670 | 95.79% | 0.330400 | 0.034770 | 0.00966500 | 0.07678000 | NM_016179       | intron     | 0       | Hs.262960 | TRPC4    |
| rs8042584  | 15 | 21674230  | 0.0556 | 94.74% | 0.188900 | 0.239800 | 0.00966500 | 0.04124000 | NM_018958       | upstream   | 797878  | Hs.649663 | C15orf2  |
| rs1454836  | 15 | 45338346  | 0.4139 | 93.68% | 0.530000 | 0.647100 | 0.00966600 | 0.00167600 | ENST00000364974 | upstream   | 13740   | ---       | ---      |
| rs10496042 | 2  | 55453314  | 0.2603 | 93.68% | 0.527400 | 0.275900 | 0.00967100 | 0.01584000 | NM_018084       | intron     | 0       | Hs.292925 | CCDC88A  |
| rs10504464 | 8  | 71109183  | 0.1362 | 97.89% | 0.798200 | 0.790100 | 0.00969400 | 0.02351000 | NM_024504       | downstream | 17391   | Hs.287532 | PRDM14   |
| rs1949532  | 3  | 168225976 | 0.3352 | 93.68% | 0.680400 | 1.000000 | 0.00970000 | 0.05894000 | ENST00000324656 | upstream   | 40229   | ---       | ---      |
| rs1859275  | 7  | 8552281   | 0.2917 | 88.42% | 0.542500 | 0.409900 | 0.00970600 | 0.02473000 | NM_152745       | upstream   | 204882  | Hs.487564 | NXPH1    |
| rs10495649 | 2  | 16283870  | 0.0542 | 97.19% | 0.563900 | 1.000000 | 0.00972300 | 0.03593000 | ENST00000388035 | downstream | 39825   | ---       | ---      |
| rs2778     | 6  | 117716222 | 0.4355 | 97.89% | 0.807900 | 0.436200 | 0.00976000 | 0.02200000 | NM_002944       | 3UTR       | 0       | Hs.1041   | ROS1     |
| rs2417232  | 12 | 12816227  | 0.4371 | 97.54% | 0.145700 | 0.134200 | 0.00976200 | 0.01107000 | NM_201224       | intron     | 0       | Hs.504828 | DDX47    |
| rs1195963  | 11 | 64698446  | 0.1945 | 96.49% | 0.000004 | 0.008892 | 0.00976400 | 0.00999700 | NM_001008778    | downstream | 1182    | Hs.450642 | SPDYC    |
| rs10514960 | 5  | 63669697  | 0.1860 | 90.53% | 0.216600 | 0.361200 | 0.00978200 | 0.00928400 | ENST00000389100 | intron     | 0       | ---       | ---      |
| rs1071883  | 5  | 178068474 | 0.2726 | 97.19% | 0.544100 | 0.598600 | 0.00978200 | 0.05287000 | NM_005649       | downstream | 2663    | Hs.484324 | ZNF354A  |
| rs10490070 | 2  | 60509183  | 0.1847 | 94.04% | 0.152200 | 0.043380 | 0.00981400 | 0.04509000 | NM_138553       | downstream | 22623   | ---       | BCL11A   |
| rs9314189  | 5  | 96547425  | 0.4638 | 96.84% | 1.000000 | 0.764800 | 0.00981400 | 0.01259000 | NM_018343       | upstream   | 2705    | Hs.27021  | RIOK2    |
| rs2209810  | 6  | 85421495  | 0.4528 | 81.75% | 0.003526 | 0.007813 | 0.00982400 | 0.01107000 | NM_014895       | upstream   | 427462  | Hs.485865 | KIAA1009 |
| rs515212   | 13 | 88955133  | 0.4022 | 95.09% | 0.377400 | 0.104800 | 0.00984000 | 0.02166000 | ENST00000298437 | upstream   | 143343  | ---       | ---      |
| rs10490442 | 2  | 34283829  | 0.1000 | 94.74% | 0.736900 | 1.000000 | 0.00985300 | 0.01200000 | ENST00000322472 | upstream   | 477483  | ---       | ---      |
| rs2050473  | 1  | 26426683  | 0.0679 | 92.98% | 1.000000 | 1.000000 | 0.00985900 | 0.00408900 | NM_022778       | upstream   | 6597    | Hs.63795  | CCDC21   |
| rs7559216  | 2  | 228888754 | 0.2632 | 93.33% | 0.429500 | 0.717400 | 0.00986200 | 0.03463000 | NM_030623       | upstream   | 134168  | Hs.436306 | SPHKAP   |
| rs1823777  | 11 | 84463859  | 0.2790 | 96.84% | 0.764900 | 0.539200 | 0.00987600 | 0.00933000 | ENST00000376104 | intron     | 0       | ---       | ---      |
| rs10512673 | 5  | 38030948  | 0.0125 | 97.89% | 1.000000 | 1.000000 | 0.00987700 | 0.08925000 | NM_199234       | upstream   | 159598  | Hs.248114 | GDNF     |
| rs2675045  | 2  | 183708388 | 0.3233 | 75.44% | 0.008199 | 0.204500 | 0.00991200 | 0.03993000 | NM_001008544    | intron     | 0       | ---       | NUP35    |
| rs4236316  | 7  | 24949054  | 0.2981 | 94.74% | 0.562000 | 0.435500 | 0.00991300 | 0.04796000 | NM_145321       | intron     | 0       | Hs.520259 | OSBPL3   |
| rs726236   | 2  | 79428695  | 0.4549 | 97.19% | 0.146600 | 0.178000 | 0.00991400 | 0.04152000 | NM_138937       | upstream   | 188308  | Hs.567312 | REG3A    |
| rs10490203 | 2  | 102425669 | 0.1764 | 96.49% | 0.678000 | 0.763400 | 0.00994800 | 0.05847000 | NM_003853       | intron     | 0       | Hs.158315 | IL18RAP  |
| rs9299988  | 11 | 25250805  | 0.0181 | 87.02% | 1.000000 | 1.000000 | 0.00996200 | 0.04600000 | NM_001009909    | downstream | 194025  | Hs.144138 | LUZP2    |
| rs6507838  | 18 | 44089985  | 0.2315 | 94.74% | 0.393000 | 0.847700 | 0.00996500 | 0.05590000 | ENST00000324663 | downstream | 56779   | ---       | ---      |
| rs7570682  | 2  | 104349699 | 0.2315 | 94.74% | 0.170000 | 0.052130 | 0.00996500 | 0.02206000 | NM_144632       | downstream | 1549389 | Hs.436203 | TMEM182  |
| rs10483892 | 14 | 77692887  | 0.1161 | 93.68% | 0.064060 | 0.134400 | 0.00996700 | 0.00643700 | NM_020421       | downstream | 222840  | Hs.413208 | ADCK1    |
| rs10520767 | 15 | 93180541  | 0.1996 | 88.77% | 0.073670 | 0.401500 | 0.00996800 | 0.02565000 | NM_018349       | downstream | 355905  | Hs.592017 | MCTP2    |
| rs726788   | 19 | 14604245  | 0.4981 | 91.23% | 0.710800 | 0.437600 | 0.00997700 | 0.00307700 | NM_152939       | intron     | 0       | ---       | EMR3     |
| rs10485987 | 7  | 21875489  | 0.4474 | 93.33% | 0.001865 | 0.015230 | 0.00998400 | 0.09924000 | NM_003777       | intron     | 0       | Hs.655326 | DNAH11   |
| rs7591631  | 2  | 175000572 | 0.2192 | 96.84% | 0.051800 | 0.320700 | 0.00998800 | 0.00867400 | NM_024583       | intron     | 0       | Hs.470679 | SCRN3    |
| rs950591   | 12 | 126238381 | 0.4837 | 96.84% | 0.118800 | 0.366400 | 0.00999900 | 0.03230000 | ENST00000386224 | upstream   | 21441   | ---       | ---      |

|            |    |           |        |        |          |          |            |            |                 |            |         |           |          |
|------------|----|-----------|--------|--------|----------|----------|------------|------------|-----------------|------------|---------|-----------|----------|
| rs10504091 | 8  | 50923329  | 0.0762 | 94.39% | 1.000000 | 0.401300 | 0.01001000 | 0.01733000 | NM_018967       | upstream   | 545997  | Hs.584914 | SNTG1    |
| rs9320599  | 6  | 117847159 | 0.0762 | 94.39% | 0.187200 | 0.077330 | 0.01001000 | 0.01219000 | NM_002944       | intron     | 0       | Hs.1041   | ROS1     |
| rs10495660 | 2  | 17260029  | 0.4909 | 96.84% | 0.228100 | 0.096610 | 0.01002000 | 0.06150000 | NM_003385       | upstream   | 325260  | Hs.444212 | VSNL1    |
| rs10514949 | 5  | 62068672  | 0.4462 | 97.89% | 0.184600 | 0.757000 | 0.01002000 | 0.01145000 | NM_016338       | downstream | 109771  | Hs.482269 | IPO11    |
| rs10496360 | 2  | 101786324 | 0.2748 | 91.93% | 0.756300 | 1.000000 | 0.01004000 | 0.02291000 | NM_145687       | intron     | 0       | Hs.431550 | MAP4K4   |
| rs226984   | 14 | 44721431  | 0.1852 | 94.74% | 0.543500 | 0.251000 | 0.01004000 | 0.01965000 | NM_020937       | intron     | 0       | Hs.509229 | FANCM    |
| rs7825740  | 8  | 33108634  | 0.0131 | 93.68% | 1.000000 | 1.000000 | 0.01004000 | 0.03375000 | ENST00000387861 | upstream   | 114317  | ---       | ---      |
| rs10494486 | 1  | 168565078 | 0.2388 | 94.04% | 0.063500 | 0.815900 | 0.01005000 | 0.02282000 | NM_152281       | upstream   | 202816  | Hs.183702 | SCYL1BP1 |
| rs763650   | 16 | 7669222   | 0.4477 | 97.19% | 0.716500 | 1.000000 | 0.01005000 | 0.00892900 | NM_018723       | intron     | 0       | Hs.459842 | A2BP1    |
| rs10499290 | 6  | 156474099 | 0.0916 | 91.93% | 1.000000 | 1.000000 | 0.01006000 | 0.04119000 | ENST00000384945 | downstream | 32150   | ---       | ---      |
| rs3797027  | 4  | 186531278 | 0.0829 | 74.04% | 0.638800 | 0.653300 | 0.01006000 | 0.07692000 | NM_018409       | intron     | 0       | Hs.558513 | LRP2BP   |
| rs491544   | 18 | 63676351  | 0.2910 | 94.04% | 0.235300 | 0.687800 | 0.01008000 | 0.15840000 | NM_032160       | upstream   | 341404  | Hs.124673 | DSEL     |
| rs682913   | 5  | 39932960  | 0.3801 | 86.32% | 0.021920 | 0.280700 | 0.01009000 | 0.02059000 | NM_001343       | upstream   | 472257  | Hs.481980 | DAB2     |
| rs10496540 | 2  | 117922404 | 0.0629 | 97.54% | 1.000000 | 0.264800 | 0.01010000 | 0.03889000 | NM_006773       | upstream   | 366321  | Hs.363492 | DDX18    |
| rs7100162  | 10 | 1972527   | 0.1859 | 94.39% | 0.691200 | 0.260600 | 0.01010000 | 0.02696000 | NM_018702       | upstream   | 202857  | Hs.657984 | ADARB2   |
| rs1125607  | 7  | 19260655  | 0.4427 | 97.89% | 0.904000 | 1.000000 | 0.01011000 | 0.00400000 | NM_152898       | upstream   | 109145  | Hs.592168 | FERD3L   |
| rs9316695  | 13 | 53513774  | 0.2116 | 93.68% | 0.271300 | 1.000000 | 0.01011000 | 0.01990000 | ENST00000258651 | downstream | 399066  | ---       | ---      |
| rs1875403  | 15 | 52909283  | 0.1461 | 93.68% | 0.045860 | 0.063140 | 0.01012000 | 0.00853500 | NM_016304       | downstream | 351530  | Hs.274772 | C15orf15 |
| rs4128767  | 15 | 79330462  | 0.3755 | 97.19% | 0.444100 | 0.866700 | 0.01012000 | 0.01330000 | NM_172217       | intron     | 0       | Hs.459095 | IL16     |
| rs10508261 | 10 | 3723731   | 0.3626 | 91.93% | 0.689100 | 0.749600 | 0.01013000 | 0.04354000 | NM_001300       | downstream | 84457   | Hs.4055   | KLF6     |
| rs10492087 | 12 | 100769604 | 0.2808 | 96.84% | 0.882400 | 0.540400 | 0.01014000 | 0.10540000 | ENST00000386360 | downstream | 14787   | ---       | ---      |
| rs10514652 | 3  | 3533527   | 0.1648 | 94.74% | 0.185100 | 0.094320 | 0.01014000 | 0.04343000 | NM_020873       | upstream   | 283023  | Hs.163244 | LRRN1    |
| rs9304121  | 18 | 29297256  | 0.3136 | 97.89% | 0.126600 | 0.411900 | 0.01014000 | 0.03483000 | NM_198995       | upstream   | 22573   | Hs.115461 | C18orf34 |
| rs10517057 | 4  | 42595319  | 0.4658 | 97.54% | 0.547000 | 0.222200 | 0.01016000 | 0.01988000 | NM_006095       | upstream   | 241452  | Hs.435052 | ATP8A1   |
| rs639441   | 5  | 39889373  | 0.2780 | 97.19% | 0.653600 | 0.605800 | 0.01016000 | 0.03750000 | NM_001343       | upstream   | 428670  | Hs.481980 | DAB2     |
| rs2400502  | 5  | 147615238 | 0.0178 | 88.77% | 1.000000 | 1.000000 | 0.01017000 | 0.03364000 | NM_205841       | downstream | 40346   | Hs.334274 | SPINK6   |
| rs10500692 | 11 | 7285272   | 0.2742 | 97.89% | 0.652100 | 0.682300 | 0.01019000 | 0.02574000 | NM_175733       | intron     | 0       | Hs.177193 | SYT9     |
| rs1873039  | 3  | 174993986 | 0.2770 | 97.54% | 0.880900 | 0.150300 | 0.01019000 | 0.01255000 | NM_014932       | intron     | 0       | Hs.478289 | NLGN1    |
| rs10492161 | 12 | 106442173 | 0.1479 | 93.68% | 0.226100 | 0.298100 | 0.01020000 | 0.05256000 | NM_152322       | intron     | 0       | ---       | BTBD11   |
| rs10501111 | 11 | 29101598  | 0.0722 | 97.19% | 0.640700 | 0.363800 | 0.01020000 | 0.01157000 | NM_152636       | downstream | 790079  | Hs.243326 | METT5D1  |
| rs1535563  | 13 | 25166265  | 0.3397 | 82.11% | 0.002045 | 0.020140 | 0.01024000 | 0.02245000 | NM_016529       | intron     | 0       | Hs.444957 | ATP8A2   |
| rs2137520  | 13 | 103468076 | 0.4315 | 87.02% | 0.517200 | 0.134700 | 0.01024000 | 0.00672200 | NM_000452       | upstream   | 950879  | Hs.194783 | SLC10A2  |
| rs1340184  | 1  | 176342013 | 0.0899 | 93.68% | 0.454300 | 0.538400 | 0.01025000 | 0.00621500 | NM_170692       | intron     | 0       | Hs.656823 | RASAL2   |
| rs7407762  | 18 | 36255946  | 0.2424 | 92.63% | 0.242400 | 0.569000 | 0.01028000 | 0.02273000 | ENST00000364090 | upstream   | 50838   | ---       | ---      |
| rs878196   | 5  | 86830251  | 0.4749 | 97.89% | 0.904500 | 1.000000 | 0.01028000 | 0.06856000 | ENST00000388468 | upstream   | 8519    | ---       | ---      |
| rs10501929 | 11 | 99278381  | 0.0756 | 95.09% | 0.378900 | 0.376000 | 0.01029000 | 0.00583900 | NM_175566       | intron     | 0       | Hs.656783 | CNTN5    |
| rs712374   | 14 | 36406369  | 0.1769 | 97.19% | 1.000000 | 1.000000 | 0.01029000 | 0.01171000 | NM_030631       | intron     | 0       | Hs.693866 | SLC25A21 |
| rs7988230  | 13 | 19526985  | 0.0414 | 93.33% | 0.064240 | 0.095790 | 0.01029000 | 0.05672000 | NM_003453       | intron     | 0       | Hs.644041 | ZMYM2    |
| rs1392885  | 4  | 101712792 | 0.1489 | 91.93% | 0.024280 | 0.065020 | 0.01031000 | 0.01021000 | NM_016242       | upstream   | 54590   | Hs.152913 | EMCN     |
| rs7859334  | 9  | 20660966  | 0.3041 | 94.04% | 0.148300 | 0.132200 | 0.01032000 | 0.04096000 | NM_017794       | intron     | 0       | Hs.408652 | KIAA1797 |
| rs10500130 | 7  | 138466453 | 0.0743 | 96.84% | 0.378100 | 0.374300 | 0.01034000 | 0.02707000 | NM_024926       | upstream   | 2611    | Hs.659165 | TTC26    |
| rs1383837  | 8  | 79220905  | 0.3687 | 97.54% | 0.897800 | 1.000000 | 0.01034000 | 0.07960000 | NM_000318       | upstream   | 1145998 | Hs.437966 | PXMP3    |
| rs2737244  | 8  | 116727405 | 0.4784 | 97.54% | 0.092000 | 0.135900 | 0.01034000 | 0.16360000 | NM_014112       | intron     | 0       | Hs.657018 | TRPS1    |
| rs1901696  | 8  | 114860437 | 0.2639 | 81.75% | 0.612300 | 1.000000 | 0.01035000 | 0.06971000 | NM_052900       | upstream   | 342019  | Hs.91381  | CSMD3    |
| rs1032047  | 3  | 128324474 | 0.0491 | 92.98% | 0.475100 | 0.542800 | 0.01037000 | 0.01327000 | NM_032242       | downstream | 85556   | Hs.432329 | PLXNA1   |
| rs6697656  | 1  | 156787361 | 0.4857 | 97.89% | 0.188200 | 0.546300 | 0.01037000 | 0.08663000 | NM_001005189    | upstream   | 2842    | Hs.553780 | OR6Y1    |
| rs2432     | 1  | 114433503 | 0.4052 | 94.39% | 0.526800 | 1.000000 | 0.01038000 | 0.01294000 | NM_205848       | 3UTR       | 0       | Hs.370963 | SYT6     |
| rs9316770  | 13 | 54689401  | 0.3723 | 97.54% | 0.898300 | 0.735000 | 0.01038000 | 0.01302000 | ENST00000258651 | upstream   | 775950  | ---       | ---      |
| rs10489056 | 4  | 26575801  | 0.0176 | 89.47% | 1.000000 | 1.000000 | 0.01039000 | 0.01782000 | NM_020860       | intron     | 0       | Hs.135763 | STIM2    |
| rs1730462  | 10 | 53933391  | 0.0406 | 95.09% | 1.000000 | 1.000000 | 0.01041000 | 0.04021000 | NM_012242       | downstream | 185968  | Hs.40499  | DDK1     |
| rs607875   | 11 | 93705335  | 0.3563 | 94.04% | 0.111400 | 0.156800 | 0.01041000 | 0.04830000 | NM_016540       | downstream | 44796   | Hs.272385 | GPR83    |
| rs798966   | 13 | 31702129  | 0.2769 | 91.23% | 0.536200 | 0.202600 | 0.01042000 | 0.04519000 | NM_023037       | intron     | 0       | Hs.591225 | FRY      |
| rs10504742 | 8  | 82950922  | 0.3550 | 94.39% | 1.000000 | 0.727100 | 0.01043000 | 0.01769000 | NM_152837       | upstream   | 33932   | Hs.492121 | SNX16    |
| rs6491830  | 13 | 103610962 | 0.0224 | 94.04% | 1.000000 | 1.000000 | 0.01043000 | 0.99720000 | NM_000452       | upstream   | 1093765 | Hs.194783 | SLC10A2  |

|            |    |           |        |        |          |          |            |            |                 |            |         |           |           |
|------------|----|-----------|--------|--------|----------|----------|------------|------------|-----------------|------------|---------|-----------|-----------|
| rs10489971 | 2  | 101894259 | 0.3201 | 97.54% | 0.492100 | 0.268800 | 0.01044000 | 0.03187000 | NM_145687       | downstream | 16676   | Hs.431550 | MAP4K4    |
| rs3856123  | 1  | 181022917 | 0.0225 | 93.68% | 0.118700 | 0.178100 | 0.01044000 | 0.99740000 | NM_030769       | upstream   | 5100    | Hs.496969 | NPL       |
| rs10495779 | 2  | 30861638  | 0.1863 | 95.09% | 0.229000 | 0.260600 | 0.01046000 | 0.00135900 | NM_144575       | intron     | 0       | Hs.660911 | CAPN13    |
| rs7534319  | 1  | 156798919 | 0.4387 | 94.39% | 0.387700 | 0.432800 | 0.01046000 | 0.05443000 | NM_001005189    | upstream   | 14400   | Hs.553780 | OR6Y1     |
| rs8072462  | 17 | 65314625  | 0.1863 | 95.09% | 0.840900 | 1.000000 | 0.01046000 | 0.05171000 | NM_002758       | downstream | 263558  | Hs.463978 | MAP2K6    |
| rs4128340  | 4  | 89127160  | 0.2293 | 93.33% | 0.298900 | 1.000000 | 0.01047000 | 0.05665000 | NM_001040060    | downstream | 3658    | Hs.313    | SPP1      |
| rs757165   | 16 | 2903318   | 0.4678 | 81.75% | 0.003829 | 0.016660 | 0.01047000 | 0.00318500 | NM_020912       | intron     | 0       | Hs.655321 | FLYWCH1   |
| rs10495657 | 2  | 17162350  | 0.3710 | 97.89% | 0.123700 | 0.031490 | 0.01049000 | 0.06246000 | ENST00000388051 | downstream | 5329    | ---       | ---       |
| rs10519134 | 15 | 74366145  | 0.0804 | 89.47% | 1.000000 | 1.000000 | 0.01049000 | 0.06644000 | NM_000126       | intron     | 0       | Hs.39925  | ETFA      |
| rs3857428  | 5  | 151509510 | 0.2880 | 96.84% | 0.463900 | 1.000000 | 0.01052000 | 0.01787000 | NM_000171       | upstream   | 224914  | Hs.121490 | GLRA1     |
| rs2823319  | 21 | 15797005  | 0.0128 | 95.79% | 1.000000 | 1.000000 | 0.01054000 | 0.99840000 | ENST00000386941 | upstream   | 111469  | ---       | ---       |
| rs10500963 | 11 | 23506567  | 0.1756 | 97.89% | 0.537300 | 1.000000 | 0.01055000 | 0.00323400 | ENST00000386849 | upstream   | 321330  | ---       | ---       |
| rs10510420 | 3  | 12408298  | 0.0223 | 94.39% | 1.000000 | 1.000000 | 0.01055000 | 0.99770000 | NM_005037       | intron     | 0       | Hs.162646 | PPARG     |
| rs1149350  | 6  | 161289796 | 0.1756 | 97.89% | 0.678700 | 0.647400 | 0.01055000 | 0.01882000 | NM_006724       | upstream   | 42953   | Hs.390428 | MAP3K4    |
| rs30669    | 5  | 129024772 | 0.3424 | 90.18% | 1.000000 | 0.274500 | 0.01055000 | 0.02205000 | NM_133638       | intron     | 0       | Hs.23751  | ADAMTS19  |
| rs1507979  | 2  | 17211253  | 0.2082 | 94.39% | 0.582400 | 0.789700 | 0.01056000 | 0.26270000 | NM_003385       | upstream   | 374036  | Hs.444212 | VSNL1     |
| rs481854   | 4  | 112073880 | 0.1306 | 94.04% | 0.276800 | 0.222100 | 0.01056000 | 0.05677000 | NM_000325       | upstream   | 310177  | Hs.643588 | PITX2     |
| rs727955   | 1  | 193278389 | 0.2341 | 93.68% | 0.039060 | 0.810100 | 0.01056000 | 0.00733100 | NM_198503       | downstream | 1183147 | Hs.657046 | KCNT2     |
| rs1233255  | 2  | 190414337 | 0.2194 | 97.54% | 0.380700 | 0.142900 | 0.01058000 | 0.09053000 | NM_000534       | intron     | 0       | Hs.111749 | PMS1      |
| rs1447429  | 3  | 63028137  | 0.1975 | 96.84% | 0.021860 | 0.054280 | 0.01059000 | 0.16950000 | NM_183393       | upstream   | 192043  | Hs.654933 | CADPS     |
| rs2205779  | 20 | 8023023   | 0.3257 | 91.58% | 0.777800 | 0.741400 | 0.01061000 | 0.09558000 | NM_182734       | upstream   | 37885   | Hs.431173 | PLCB1     |
| rs10500962 | 11 | 23505641  | 0.1745 | 97.54% | 0.531600 | 1.000000 | 0.01064000 | 0.00360500 | ENST00000386849 | upstream   | 322256  | ---       | ---       |
| rs10494702 | 1  | 192503271 | 0.0535 | 85.26% | 0.138500 | 0.181800 | 0.01065000 | 0.09926000 | ENST00000385495 | downstream | 220585  | ---       | ---       |
| rs10505181 | 8  | 113368451 | 0.2000 | 80.70% | 0.300100 | 0.492200 | 0.01065000 | 0.05737000 | NM_052900       | intron     | 0       | Hs.91381  | CSMD3     |
| rs6573960  | 14 | 69926775  | 0.1487 | 94.39% | 0.226500 | 0.716700 | 0.01065000 | 0.01429000 | NM_018373       | intron     | 0       | Hs.443661 | SYNJ2BP   |
| rs1017833  | 4  | 71206730  | 0.0216 | 97.54% | 1.000000 | 1.000000 | 0.01066000 | 0.11700000 | NM_033122       | upstream   | 28557   | Hs.120316 | C4orf35   |
| rs1480741  | 4  | 71221349  | 0.0216 | 97.54% | 1.000000 | 1.000000 | 0.01066000 | 0.11880000 | NM_033122       | upstream   | 13938   | Hs.120316 | C4orf35   |
| rs2010521  | 15 | 77274773  | 0.2401 | 79.65% | 0.071390 | 0.198800 | 0.01068000 | 0.06594000 | NM_153815       | upstream   | 104612  | Hs.591111 | RASGRF1   |
| rs10501766 | 11 | 91297444  | 0.4358 | 92.98% | 0.708000 | 0.338200 | 0.01069000 | 0.19960000 | NM_012124       | upstream   | 1701617 | Hs.22857  | CHORDC1   |
| rs3212539  | 5  | 52392458  | 0.0759 | 94.74% | 1.000000 | 1.000000 | 0.01069000 | 0.01577000 | NM_002203       | intron     | 0       | Hs.482077 | ITGA2     |
| rs951196   | 6  | 162581980 | 0.3863 | 97.19% | 1.000000 | 0.618700 | 0.01070000 | 0.02428000 | NM_013988       | intron     | 0       | Hs.132954 | PARK2     |
| rs10486383 | 7  | 20154491  | 0.0480 | 95.09% | 1.000000 | 1.000000 | 0.01071000 | 0.06617000 | NM_182762       | intron     | 0       | Hs.598388 | 7A5       |
| rs10505202 | 8  | 114295875 | 0.0500 | 91.23% | 1.000000 | 1.000000 | 0.01071000 | 0.02409000 | NM_052900       | intron     | 0       | Hs.91381  | CSMD3     |
| rs2052943  | 2  | 222019310 | 0.1333 | 84.21% | 0.395900 | 0.562300 | 0.01071000 | 0.00670900 | NM_004438       | intron     | 0       | Hs.371218 | EPHA4     |
| rs336081   | 5  | 54469150  | 0.2481 | 91.93% | 0.012260 | 0.007999 | 0.01071000 | 0.03134000 | NM_152623       | intron     | 0       | Hs.669184 | CDC20B    |
| rs1021479  | 16 | 84514915  | 0.2043 | 90.18% | 0.570200 | 0.788400 | 0.01075000 | 0.00617900 | NM_002163       | downstream | 1205    | Hs.137427 | IRF8      |
| rs3920498  | 1  | 22365474  | 0.2536 | 96.84% | 0.636300 | 0.661600 | 0.01075000 | 0.03710000 | NM_030761       | upstream   | 23436   | Hs.25766  | WNT4      |
| rs4881113  | 10 | 3180853   | 0.2178 | 92.63% | 1.000000 | 0.803800 | 0.01075000 | 0.05297000 | NM_014889       | intron     | 0       | Hs.528300 | PITRM1    |
| rs10510971 | 3  | 68764105  | 0.0400 | 96.49% | 0.060480 | 0.078070 | 0.01076000 | 0.01443000 | NM_213609       | downstream | 74945   | Hs.655061 | FAM19A1   |
| rs1480744  | 4  | 71225621  | 0.0215 | 97.89% | 1.000000 | 1.000000 | 0.01076000 | 0.12150000 | NM_033122       | upstream   | 9666    | Hs.120316 | C4orf35   |
| rs1977504  | 9  | 102872354 | 0.0353 | 89.47% | 0.267100 | 1.000000 | 0.01079000 | 0.00213600 | NM_207299       | intron     | 0       | Hs.382683 | RP11-35N6 |
| rs3100717  | 2  | 138491021 | 0.3130 | 94.74% | 0.480000 | 0.574600 | 0.01080000 | 0.00659800 | NM_001024075    | downstream | 35303   | Hs.42151  | HNMT      |
| rs10515818 | 5  | 160392731 | 0.3308 | 91.23% | 0.484600 | 0.360800 | 0.01081000 | 0.01592000 | NM_000813       | downstream | 260718  | Hs.303527 | GABRB2    |
| rs7995365  | 13 | 72713928  | 0.3450 | 95.09% | 0.422000 | 0.425500 | 0.01082000 | 0.01245000 | NM_007249       | downstream | 444222  | Hs.373857 | KLF12     |
| rs10513175 | 9  | 114786691 | 0.3364 | 96.49% | 0.591400 | 0.338500 | 0.01083000 | 0.00347400 | NM_003408       | downstream | 57304   | Hs.150406 | ZFP37     |
| rs2041764  | 2  | 40424390  | 0.2996 | 90.18% | 0.881800 | 0.495100 | 0.01083000 | 0.00572900 | NM_021097       | intron     | 0       | Hs.468274 | SLC8A1    |
| rs10489941 | 1  | 191950366 | 0.0781 | 94.39% | 0.063520 | 0.071690 | 0.01086000 | 0.04549000 | NM_024529       | downstream | 460712  | Hs.576497 | CDC73     |
| rs10508349 | 10 | 8338970   | 0.2704 | 94.74% | 0.646400 | 1.000000 | 0.01086000 | 0.08566000 | NM_002051       | downstream | 181800  | Hs.524134 | GATA3     |
| rs10519562 | 4  | 141629187 | 0.1750 | 91.23% | 0.389600 | 0.358000 | 0.01086000 | 0.00414800 | NM_001034840    | intron     | 0       | ---       | LOC152586 |
| rs708881   | 12 | 118432415 | 0.3382 | 95.44% | 0.787900 | 0.855700 | 0.01088000 | 0.01805000 | NM_178499       | intron     | 0       | Hs.98188  | CCDC60    |
| rs1871710  | 4  | 71225004  | 0.0217 | 97.19% | 1.000000 | 1.000000 | 0.01089000 | 0.12740000 | NM_033122       | upstream   | 10283   | Hs.120316 | C4orf35   |
| rs2001778  | 11 | 5575584   | 0.4556 | 94.74% | 0.110300 | 0.029690 | 0.01089000 | 0.01050000 | NM_001003819    | intron     | 0       | Hs.125300 | TRIM6-TRI |
| rs4128218  | 4  | 36133208  | 0.4432 | 92.63% | 0.012530 | 0.645400 | 0.01089000 | 0.02803000 | ENST00000357504 | downstream | 111397  | ---       | ---       |
| rs2541422  | 8  | 37400936  | 0.1882 | 95.09% | 0.108400 | 0.128200 | 0.01090000 | 0.06339000 | NM_021631       | downstream | 534950  | Hs.651853 | FKSG2     |

|            |    |           |        |        |          |          |            |            |                 |            |         |           |           |
|------------|----|-----------|--------|--------|----------|----------|------------|------------|-----------------|------------|---------|-----------|-----------|
| rs1959915  | 14 | 40613479  | 0.3927 | 96.49% | 0.899600 | 0.761200 | 0.01091000 | 0.04635000 | NM_152447       | upstream   | 533044  | Hs.136893 | LRFN5     |
| rs1990745  | 5  | 103409821 | 0.3100 | 95.09% | 0.117400 | 0.022850 | 0.01091000 | 0.00341200 | NM_031438       | upstream   | 483428  | Hs.434289 | NUDT12    |
| rs1518081  | 2  | 199342013 | 0.2073 | 96.49% | 1.000000 | 0.837500 | 0.01092000 | 0.00827200 | NM_006226       | downstream | 620720  | Hs.153322 | PLCL1     |
| rs7729828  | 5  | 146036640 | 0.0659 | 95.79% | 0.324300 | 0.038780 | 0.01092000 | 0.01365000 | NM_181678       | intron     | 0       | Hs.655213 | PPP2R2B   |
| rs1537394  | 1  | 168673730 | 0.3863 | 97.19% | 0.163300 | 0.281500 | 0.01093000 | 0.04720000 | NM_152281       | upstream   | 94164   | Hs.183702 | SCYL1BP1  |
| rs2058404  | 7  | 10133347  | 0.0128 | 96.14% | 1.000000 | 1.000000 | 0.01093000 | 0.02831000 | ENST00000387411 | upstream   | 95602   | ---       | ---       |
| rs496916   | 13 | 109649015 | 0.2559 | 89.82% | 0.140900 | 0.137100 | 0.01094000 | 0.01079000 | NM_001845       | intron     | 0       | Hs.17441  | COL4A1    |
| rs2896632  | 15 | 56599161  | 0.1398 | 97.89% | 0.452500 | 1.000000 | 0.01095000 | 0.03153000 | NM_000236       | intron     | 0       | Hs.654472 | LIPC      |
| rs7124287  | 11 | 96375443  | 0.4758 | 94.39% | 0.328900 | 0.442900 | 0.01095000 | 0.01064000 | ENST00000362445 | upstream   | 658231  | ---       | ---       |
| rs9304243  | 18 | 36966235  | 0.1398 | 97.89% | 0.452500 | 0.285100 | 0.01095000 | 0.06681000 | NM_002647       | upstream   | 822962  | Hs.464971 | PIK3C3    |
| rs711865   | 4  | 110173221 | 0.4720 | 94.04% | 0.014020 | 0.168700 | 0.01096000 | 0.00826400 | NM_032518       | intron     | 0       | Hs.658842 | COL25A1   |
| rs7870469  | 9  | 101899623 | 0.1111 | 97.89% | 0.126000 | 0.334800 | 0.01098000 | 0.02309000 | NM_015051       | intron     | 0       | Hs.591899 | TXNDC4    |
| rs1478876  | 13 | 80741069  | 0.4837 | 86.32% | 0.073440 | 0.195700 | 0.01099000 | 0.00389700 | ENST00000387380 | downstream | 3117    | ---       | ---       |
| rs10490899 | 10 | 24635726  | 0.0817 | 90.18% | 0.073140 | 0.081350 | 0.01102000 | 0.01422000 | NM_019590       | intron     | 0       | Hs.445885 | KIAA1217  |
| rs2277401  | 12 | 5712102   | 0.3718 | 68.42% | 0.000744 | 0.000517 | 0.01104000 | 0.03446000 | NM_020373       | intron     | 0       | Hs.148970 | TMEM16B   |
| rs7716399  | 5  | 158083224 | 0.0932 | 82.81% | 1.000000 | 1.000000 | 0.01104000 | 0.01877000 | NM_024007       | intron     | 0       | Hs.657753 | EBF1      |
| rs10512687 | 5  | 38617019  | 0.3095 | 88.42% | 0.183600 | 0.324440 | 0.01107000 | 0.00871000 | NM_002310       | intron     | 0       | Hs.133421 | LIFR      |
| rs2442359  | 13 | 38202814  | 0.3871 | 97.89% | 0.613800 | 0.358900 | 0.01107000 | 0.00373000 | NM_207361       | intron     | 0       | Hs.253994 | FREM2     |
| rs1361472  | 13 | 58406463  | 0.2491 | 93.68% | 0.743400 | 1.000000 | 0.01110000 | 0.00653100 | ENST00000365514 | upstream   | 406577  | ---       | ---       |
| rs10514961 | 5  | 63123359  | 0.0775 | 95.09% | 1.000000 | 1.000000 | 0.01111000 | 0.00837100 | NM_000524       | downstream | 168675  | Hs.247940 | HTR1A     |
| rs1389319  | 5  | 64662209  | 0.0860 | 97.89% | 0.438700 | 1.000000 | 0.01111000 | 0.04899000 | NM_197941       | intron     | 0       | Hs.482291 | ADAMTS6   |
| rs2131592  | 5  | 64671924  | 0.0866 | 97.19% | 0.441100 | 1.000000 | 0.01111000 | 0.05501000 | NM_197941       | intron     | 0       | Hs.482291 | ADAMTS6   |
| rs718652   | 13 | 25878590  | 0.3933 | 83.86% | 0.014840 | 0.157900 | 0.01112000 | 0.04038000 | NM_001260       | downstream | 2021    | Hs.382306 | CDK8      |
| rs10502759 | 18 | 37083253  | 0.0799 | 94.39% | 0.679200 | 0.694400 | 0.01113000 | 0.03256000 | NM_002647       | upstream   | 705944  | Hs.464971 | PIK3C3    |
| rs7093376  | 10 | 84018388  | 0.3971 | 97.19% | 0.900700 | 0.871800 | 0.01113000 | 0.06681000 | NM_001010848    | intron     | 0       | Hs.125119 | NRG3      |
| rs1035496  | 5  | 41174006  | 0.2917 | 96.84% | 0.467400 | 0.692700 | 0.01115000 | 0.08059000 | NM_000065       | downstream | 4087    | Hs.481992 | C6        |
| rs3885379  | 4  | 190714909 | 0.1214 | 73.68% | 0.049710 | 0.601600 | 0.01117000 | 0.01541000 | ENST00000378770 | downstream | 81571   | ---       | ---       |
| rs956129   | 15 | 65416229  | 0.2554 | 97.54% | 0.081320 | 0.128200 | 0.01117000 | 0.01569000 | NM_022784       | intron     | 0       | Hs.657894 | IQCH      |
| rs10514151 | 5  | 78339243  | 0.0796 | 94.74% | 0.227800 | 0.394600 | 0.01120000 | 0.05065000 | NM_013391       | intron     | 0       | Hs.655653 | DMGDH     |
| rs10518007 | 4  | 67385120  | 0.1011 | 95.44% | 0.168600 | 0.737900 | 0.01120000 | 0.02547000 | ENST00000383902 | downstream | 592785  | ---       | ---       |
| rs249732   | 5  | 141867735 | 0.2741 | 80.00% | 0.000000 | 0.000000 | 0.01121000 | 0.02413000 | NM_033137       | downstream | 85572   | Hs.483635 | FGF1      |
| rs1370360  | 2  | 55416992  | 0.2609 | 96.84% | 0.754600 | 0.390800 | 0.01123000 | 0.02882000 | NM_018084       | intron     | 0       | Hs.292925 | CCDC88A   |
| rs2061638  | 5  | 152618325 | 0.1231 | 91.23% | 1.000000 | 1.000000 | 0.01123000 | 0.00448900 | NM_000827       | upstream   | 232174  | Hs.519693 | GRIA1     |
| rs4865582  | 5  | 54029405  | 0.2435 | 95.09% | 0.030790 | 0.261300 | 0.01123000 | 0.03959000 | NM_052870       | downstream | 177979  | Hs.432755 | SNAG1     |
| rs2593122  | 10 | 55327026  | 0.1890 | 86.32% | 1.000000 | 0.820700 | 0.01124000 | 0.03028000 | NM_033056       | intron     | 0       | Hs.672170 | PCDH15    |
| rs7809986  | 7  | 78525055  | 0.1439 | 97.54% | 0.048380 | 1.000000 | 0.01124000 | 0.02551000 | NM_012301       | intron     | 0       | Hs.654788 | MAGI2     |
| rs2211404  | 6  | 112852722 | 0.3887 | 92.98% | 0.039280 | 0.216300 | 0.01125000 | 0.01272000 | ENST00000386079 | upstream   | 51899   | ---       | ---       |
| rs10496795 | 2  | 138521143 | 0.1519 | 94.74% | 0.353000 | 0.609500 | 0.01126000 | 0.00676300 | NM_001024075    | downstream | 65425   | Hs.42151  | HNMT      |
| rs7135276  | 12 | 40329444  | 0.3187 | 91.93% | 0.392700 | 0.336900 | 0.01126000 | 0.01816000 | NM_013377       | downstream | 74793   | Hs.380044 | PDZRN4    |
| rs10495301 | 1  | 229101263 | 0.2070 | 95.79% | 0.362300 | 0.600700 | 0.01127000 | 0.03032000 | NM_024525       | downstream | 7349    | Hs.424788 | TTC13     |
| rs1496786  | 7  | 78128273  | 0.4741 | 81.40% | 0.147000 | 0.098350 | 0.01128000 | 0.18890000 | NM_012301       | intron     | 0       | Hs.654788 | MAGI2     |
| rs1910647  | 21 | 24342702  | 0.3160 | 94.39% | 0.397500 | 0.194900 | 0.01128000 | 0.08652000 | ENST00000355181 | upstream   | 440439  | ---       | ---       |
| rs717336   | 22 | 48069777  | 0.3412 | 97.19% | 0.893600 | 0.525900 | 0.01128000 | 0.00398800 | NM_207478       | upstream   | 258556  | ---       | FLJ44385  |
| rs913098   | 6  | 51750772  | 0.3155 | 95.09% | 0.121200 | 0.039620 | 0.01132000 | 0.00842600 | NM_170724       | intron     | 0       | Hs.662050 | PKHD1     |
| rs10506980 | 12 | 88669315  | 0.3820 | 93.68% | 0.796000 | 1.000000 | 0.01134000 | 0.02866000 | ENST00000388111 | downstream | 24385   | ---       | ---       |
| rs10514724 | 3  | 69839673  | 0.2956 | 96.14% | 0.147500 | 0.127300 | 0.01134000 | 0.08645000 | NM_198178       | upstream   | 55979   | Hs.166017 | MITF      |
| rs4239056  | 17 | 5265130   | 0.3907 | 97.89% | 0.381300 | 0.365000 | 0.01135000 | 0.05494000 | NM_032308       | intron     | 0       | ---       | RPAIN     |
| rs9303192  | 17 | 5265560   | 0.3907 | 97.89% | 0.381300 | 0.365000 | 0.01135000 | 0.05494000 | NM_032308       | intron     | 0       | ---       | RPAIN     |
| rs1571687  | 21 | 31018364  | 0.0441 | 91.58% | 1.000000 | 1.000000 | 0.01137000 | 0.00964300 | NM_181617       | downstream | 22776   | Hs.553699 | KRTAP21-2 |
| rs10518645 | 1  | 80639912  | 0.0604 | 92.98% | 0.238900 | 0.238200 | 0.01138000 | 0.17250000 | ENST00000388387 | upstream   | 850150  | ---       | ---       |
| rs10504859 | 8  | 89628714  | 0.1500 | 94.74% | 0.155300 | 0.204700 | 0.01139000 | 0.02944000 | NM_003821       | upstream   | 1210459 | Hs.103755 | RIPK2     |
| rs6989533  | 8  | 89617688  | 0.1500 | 94.74% | 0.155300 | 0.204700 | 0.01139000 | 0.04201000 | NM_003821       | upstream   | 1221485 | Hs.103755 | RIPK2     |
| rs1401705  | 2  | 17421443  | 0.3424 | 90.18% | 0.001342 | 0.005022 | 0.01140000 | 0.04144000 | NM_003385       | upstream   | 163846  | Hs.444212 | VSNL1     |
| rs768804   | 12 | 90518229  | 0.0916 | 91.93% | 1.000000 | 0.549600 | 0.01140000 | 0.03844000 | NM_133507       | upstream   | 417292  | Hs.156316 | DCN       |

|            |    |           |        |        |          |          |            |            |                 |            |         |           |           |
|------------|----|-----------|--------|--------|----------|----------|------------|------------|-----------------|------------|---------|-----------|-----------|
| rs10502712 | 18 | 34729747  | 0.0911 | 94.39% | 1.000000 | 1.000000 | 0.01143000 | 0.01416000 | NM_020180       | upstream   | 1329806 | Hs.435976 | BRUNOL4   |
| rs10493689 | 1  | 81567840  | 0.1208 | 92.98% | 0.557900 | 0.766900 | 0.01145000 | 0.00160800 | ENST00000370721 | intron     | 0       | ---       | ---       |
| rs10496140 | 2  | 67116731  | 0.1848 | 96.84% | 0.691100 | 0.662400 | 0.01148000 | 0.01988000 | NM_019002       | upstream   | 361215  | Hs.353022 | ETAA1     |
| rs10496490 | 2  | 115826981 | 0.2960 | 97.19% | 0.470600 | 0.434000 | 0.01148000 | 0.07137000 | NM_001004360    | intron     | 0       | Hs.591555 | DPP10     |
| rs9313447  | 5  | 168544310 | 0.1212 | 92.63% | 1.000000 | 1.000000 | 0.01148000 | 0.02852000 | NM_003062       | intron     | 0       | Hs.604116 | SLIT3     |
| rs774788   | 18 | 48093325  | 0.1109 | 90.18% | 0.000203 | 0.004067 | 0.01150000 | 0.01341000 | NM_005215       | upstream   | 27831   | Hs.579550 | DCC       |
| rs10496165 | 2  | 68473593  | 0.2199 | 93.33% | 0.594000 | 1.000000 | 0.01151000 | 0.00886700 | NM_002664       | intron     | 0       | Hs.468840 | PLEK      |
| rs6467491  | 7  | 132789301 | 0.1568 | 82.81% | 0.004911 | 0.006168 | 0.01153000 | 0.00724300 | NM_001037126    | intron     | 0       | Hs.321273 | EXOC4     |
| rs7241727  | 18 | 28623586  | 0.3454 | 91.93% | 0.785700 | 1.000000 | 0.01154000 | 0.10240000 | NM_020805       | upstream   | 16614   | Hs.446164 | KLHL14    |
| rs259174   | 5  | 119121597 | 0.3773 | 94.39% | 0.091320 | 0.064680 | 0.01157000 | 0.04246000 | NM_182761       | downstream | 122182  | Hs.406861 | LOC340069 |
| rs669644   | 5  | 39912612  | 0.4079 | 97.19% | 0.216100 | 0.871900 | 0.01158000 | 0.01381000 | NM_001343       | upstream   | 451909  | Hs.481980 | DAB2      |
| rs10491157 | 17 | 50574958  | 0.0429 | 94.04% | 1.000000 | 1.000000 | 0.01160000 | 0.01572000 | NM_178509       | intron     | 0       | Hs.35199  | STXBP4    |
| rs10507510 | 13 | 41971157  | 0.2025 | 97.89% | 0.194300 | 0.676800 | 0.01160000 | 0.02267000 | NM_033012       | upstream   | 75283   | Hs.333791 | TNFSF11   |
| rs794255   | 6  | 119392448 | 0.0657 | 96.14% | 0.614900 | 0.617300 | 0.01160000 | 0.06245000 | NM_024581       | intron     | 0       | Hs.443789 | C6orf60   |
| rs9299457  | 10 | 52509700  | 0.2833 | 92.28% | 0.447000 | 0.011820 | 0.01161000 | 0.04930000 | NM_006258       | intron     | 0       | Hs.654556 | PRKG1     |
| rs1930386  | 9  | 80756308  | 0.1014 | 96.84% | 0.500500 | 0.602500 | 0.01162000 | 0.16370000 | ENST00000386386 | upstream   | 208060  | ---       | ---       |
| rs7114092  | 11 | 33602034  | 0.3398 | 90.88% | 0.580000 | 0.717700 | 0.01163000 | 0.00603000 | ENST00000389726 | intron     | 0       | ---       | ---       |
| rs132692   | 22 | 34909112  | 0.2581 | 97.89% | 0.087580 | 0.104700 | 0.01165000 | 0.15660000 | NM_145660       | downstream | 7957    | Hs.115099 | APOL4     |
| rs2172829  | 4  | 85331893  | 0.0357 | 93.33% | 1.000000 | 1.000000 | 0.01165000 | 0.04217000 | ENST00000363238 | upstream   | 41941   | ---       | ---       |
| rs10503603 | 8  | 17607342  | 0.1122 | 89.12% | 0.006180 | 0.021750 | 0.01166000 | 0.00252500 | NM_001001927    | intron     | 0       | ---       | MTUS1     |
| rs10515858 | 5  | 162772506 | 0.0281 | 93.68% | 0.183000 | 1.000000 | 0.01166000 | 0.03352000 | NM_199246       | upstream   | 24649   | Hs.79101  | CCNG1     |
| rs1921314  | 12 | 11473914  | 0.0583 | 93.33% | 0.215000 | 0.212000 | 0.01166000 | 0.07867000 | NM_199354       | upstream   | 34161   | Hs.631726 | PRB1      |
| rs359470   | 5  | 173233293 | 0.4644 | 93.68% | 0.460100 | 0.124400 | 0.01166000 | 0.00877600 | NM_030627       | upstream   | 15502   | Hs.127126 | CPEB4     |
| rs613188   | 1  | 238011978 | 0.2292 | 97.19% | 0.128100 | 0.334400 | 0.01169000 | 0.04448000 | NM_000740       | intron     | 0       | Hs.7138   | CHRM3     |
| rs198278   | 7  | 24214718  | 0.4757 | 94.04% | 0.006894 | 0.220400 | 0.01171000 | 0.05946000 | ENST00000387588 | downstream | 53037   | ---       | ---       |
| rs2255565  | 2  | 118114972 | 0.0940 | 93.33% | 0.713000 | 0.710500 | 0.01171000 | 0.01901000 | NM_006773       | upstream   | 173753  | Hs.363492 | DDX18     |
| rs544166   | 11 | 131320554 | 0.3025 | 96.84% | 0.255800 | 0.180300 | 0.01171000 | 0.03537000 | NM_016522       | intron     | 0       | Hs.504352 | HNT       |
| rs6495809  | 15 | 34038746  | 0.1970 | 94.39% | 0.562900 | 0.830900 | 0.01171000 | 0.01363000 | NM_080650       | upstream   | 413090  | Hs.107196 | ATPBD4    |
| rs7827393  | 8  | 56669762  | 0.0431 | 93.68% | 0.390300 | 1.000000 | 0.01172000 | 0.04267000 | NM_052898       | downstream | 70422   | Hs.130197 | XKR4      |
| rs10483670 | 14 | 56079771  | 0.0766 | 96.14% | 0.200000 | 0.078130 | 0.01173000 | 0.02232000 | NM_017799       | upstream   | 36493   | Hs.497253 | C14orf101 |
| rs10510780 | 3  | 56086412  | 0.1007 | 97.54% | 0.331100 | 0.602600 | 0.01173000 | 0.02037000 | NM_015576       | intron     | 0       | Hs.476389 | ERC2      |
| rs2048541  | 11 | 114884183 | 0.1063 | 94.04% | 0.196600 | 0.185100 | 0.01173000 | 0.04899000 | NM_014333       | upstream   | 3861    | Hs.370510 | CADM1     |
| rs1341198  | 6  | 63794816  | 0.3783 | 92.28% | 0.115000 | 0.016930 | 0.01174000 | 0.00696700 | ENST00000370659 | upstream   | 184494  | ---       | ---       |
| rs10502763 | 18 | 37178557  | 0.1537 | 94.74% | 0.099430 | 0.032650 | 0.01175000 | 0.02651000 | NM_002647       | upstream   | 610640  | Hs.464971 | PIK3C3    |
| rs627894   | 11 | 81585586  | 0.4669 | 95.44% | 0.038190 | 0.065080 | 0.01175000 | 0.01759000 | ENST00000357859 | upstream   | 492663  | ---       | ---       |
| rs9322419  | 6  | 153669526 | 0.2074 | 80.35% | 0.007720 | 0.006350 | 0.01175000 | 0.15930000 | ENST00000312401 | upstream   | 23965   | ---       | ---       |
| rs802296   | 6  | 124542788 | 0.3715 | 88.77% | 0.590900 | 0.602100 | 0.01176000 | 0.00565100 | NM_001040214    | intron     | 0       | Hs.656604 | NKAIN2    |
| rs2030712  | 7  | 138945471 | 0.3258 | 93.68% | 0.265900 | 0.623600 | 0.01177000 | 0.07682000 | NM_022740       | intron     | 0       | Hs.397465 | HIPK2     |
| rs2139090  | 11 | 93363251  | 0.3826 | 92.63% | 1.000000 | 0.874700 | 0.01178000 | 0.00328900 | ENST00000389578 | upstream   | 30941   | ---       | ---       |
| rs687582   | 13 | 43405689  | 0.2939 | 97.89% | 0.566300 | 0.695000 | 0.01180000 | 0.02946000 | NM_153218       | downstream | 41322   | Hs.210586 | C13orf31  |
| rs10516838 | 4  | 90677255  | 0.1956 | 95.09% | 0.175100 | 1.000000 | 0.01181000 | 0.01876000 | NM_000345       | downstream | 189224  | Hs.271771 | SNCA      |
| rs1331649  | 13 | 88636728  | 0.1956 | 95.09% | 0.332900 | 0.787600 | 0.01181000 | 0.01538000 | NM_015567       | downstream | 1506856 | Hs.591208 | SLITRK5   |
| rs7041758  | 9  | 109320317 | 0.2372 | 96.14% | 0.066410 | 0.058820 | 0.01181000 | 0.02464000 | NM_004235       | upstream   | 28569   | Hs.376206 | KLF4      |
| rs10507396 | 13 | 30611542  | 0.1022 | 96.14% | 1.000000 | 0.602500 | 0.01182000 | 0.04602000 | NM_006644       | intron     | 0       | Hs.36927  | HSPH1     |
| rs1426247  | 11 | 59805749  | 0.0351 | 95.09% | 1.000000 | 1.000000 | 0.01183000 | 0.00341600 | NM_148975       | intron     | 0       | Hs.325960 | MS4A4A    |
| rs10485739 | 20 | 10108092  | 0.4724 | 95.44% | 0.716400 | 0.758800 | 0.01184000 | 0.09360000 | NM_130811       | upstream   | 39385   | Hs.167317 | SNAP25    |
| rs10517003 | 4  | 40963950  | 0.1319 | 95.79% | 0.283600 | 0.157500 | 0.01184000 | 0.03691000 | NM_004181       | intron     | 0       | Hs.518731 | UCHL1     |
| rs2378665  | 9  | 85924039  | 0.3369 | 97.89% | 0.420900 | 0.477500 | 0.01184000 | 0.02079000 | NM_024945       | downstream | 115234  | Hs.284137 | RMI1      |
| rs587703   | 11 | 116332775 | 0.0082 | 85.61% | 1.000000 | 1.000000 | 0.01184000 | 0.99870000 | NM_025164       | intron     | 0       | Hs.167451 | KIAA0999  |
| rs10510364 | 3  | 7356271   | 0.1625 | 97.19% | 0.505200 | 0.228200 | 0.01185000 | 0.02686000 | NM_181875       | intron     | 0       | ---       | GRM7      |
| rs1872325  | 2  | 22775527  | 0.4341 | 95.79% | 0.805500 | 0.545100 | 0.01186000 | 0.02637000 | ENST00000388128 | upstream   | 162404  | ---       | ---       |
| rs2345475  | 4  | 42443300  | 0.4206 | 97.19% | 0.623100 | 0.880700 | 0.01188000 | 0.05754000 | NM_006095       | upstream   | 89641   | Hs.435052 | ATP8A1    |
| rs2378303  | 9  | 80734665  | 0.4355 | 89.82% | 0.527200 | 1.000000 | 0.01188000 | 0.06180000 | ENST00000386386 | upstream   | 186417  | ---       | ---       |
| rs1599238  | 18 | 53342611  | 0.2854 | 94.04% | 0.230500 | 0.305100 | 0.01191000 | 0.15140000 | NM_000140       | downstream | 23924   | Hs.465221 | FECH      |

|            |    |           |        |        |          |          |            |            |                 |            |         |           |          |
|------------|----|-----------|--------|--------|----------|----------|------------|------------|-----------------|------------|---------|-----------|----------|
| rs10509346 | 10 | 75266020  | 0.1673 | 95.44% | 0.077570 | 0.053980 | 0.01192000 | 0.01340000 | NM_172172       | intron     | 0       | ---       | CAMK2G   |
| rs182713   | 12 | 52560891  | 0.1449 | 96.84% | 0.002385 | 0.002782 | 0.01192000 | 0.00592600 | NM_017410       | upstream   | 57952   | Hs.118608 | HOXC13   |
| rs984440   | 8  | 139146910 | 0.1272 | 97.89% | 0.277100 | 0.261500 | 0.01193000 | 0.00739400 | NM_015912       | downstream | 66798   | Hs.126024 | FAM135B  |
| rs718714   | 18 | 1686271   | 0.1012 | 88.42% | 0.151300 | 0.225600 | 0.01195000 | 0.05401000 | NM_022840       | downstream | 841259  | Hs.126888 | METTL4   |
| rs10518819 | 2  | 57568221  | 0.3496 | 96.84% | 0.692800 | 0.598100 | 0.01198000 | 0.00617400 | NM_006296       | upstream   | 559003  | Hs.631890 | VRK2     |
| rs32249    | 5  | 12519975  | 0.0489 | 82.46% | 0.000907 | 0.004000 | 0.01199000 | 0.04040000 | NM_001369       | downstream | 1225064 | Hs.212360 | DNAH5    |
| rs9332418  | 1  | 182268515 | 0.2841 | 95.09% | 0.655100 | 0.494600 | 0.01199000 | 0.05491000 | NM_015101       | intron     | 0       | Hs.387995 | GLT25D2  |
| rs1999571  | 1  | 98018329  | 0.0352 | 94.74% | 0.279600 | 1.000000 | 0.01201000 | 0.00840300 | NM_000110       | intron     | 0       | Hs.335034 | DPYD     |
| rs4941700  | 13 | 32383381  | 0.2852 | 94.74% | 0.765700 | 0.314600 | 0.01202000 | 0.01109000 | NM_015032       | downstream | 133224  | Hs.699308 | PDS5B    |
| rs10496065 | 2  | 57567944  | 0.3489 | 97.54% | 0.692800 | 0.489400 | 0.01203000 | 0.00537800 | NM_006296       | upstream   | 559280  | Hs.631890 | VRK2     |
| rs2271700  | 10 | 71519942  | 0.2986 | 97.54% | 0.886800 | 0.701300 | 0.01203000 | 0.01524000 | NM_018649       | intron     | 0       | Hs.499953 | H2AFY2   |
| rs3733727  | 5  | 134717199 | 0.1236 | 93.68% | 0.393100 | 0.374800 | 0.01204000 | 0.05153000 | NM_001040158    | intron     | 0       | Hs.696013 | H2AFY    |
| rs391449   | 8  | 37251704  | 0.3966 | 93.33% | 0.608600 | 0.758100 | 0.01205000 | 0.12810000 | NM_021631       | downstream | 385718  | Hs.651853 | FKSG2    |
| rs10498359 | 14 | 40607147  | 0.3856 | 95.09% | 0.521500 | 0.541800 | 0.01206000 | 0.06086000 | NM_152447       | upstream   | 539376  | Hs.136893 | LRFN5    |
| rs7943194  | 11 | 84347646  | 0.4041 | 93.33% | 0.610700 | 0.066440 | 0.01207000 | 0.05460000 | ENST00000376104 | intron     | 0       | ---       | ---      |
| rs10493370 | 1  | 65017928  | 0.1222 | 94.74% | 0.568600 | 1.000000 | 0.01209000 | 0.01338000 | NM_018211       | intron     | 0       | Hs.591443 | RAVER2   |
| rs10500560 | 16 | 70238654  | 0.2519 | 93.33% | 0.744800 | 0.376300 | 0.01210000 | 0.08608000 | NM_015020       | 3UTR       | 0       | Hs.531564 | PHLPPL   |
| rs10508343 | 10 | 8190719   | 0.1895 | 89.82% | 0.228100 | 0.082220 | 0.01210000 | 0.03967000 | NM_002051       | downstream | 33549   | Hs.524134 | GATA3    |
| rs1917450  | 11 | 103062875 | 0.1502 | 95.79% | 0.029890 | 0.278900 | 0.01212000 | 0.00174900 | NM_033135       | downstream | 220256  | Hs.352298 | PDGFD    |
| rs1867324  | 5  | 112567854 | 0.4140 | 97.89% | 0.459200 | 0.113300 | 0.01214000 | 0.02762000 | NM_002387       | intron     | 0       | Hs.593171 | MCC      |
| rs747498   | 8  | 131099762 | 0.3266 | 95.09% | 0.581100 | 1.000000 | 0.01214000 | 0.20620000 | NM_018482       | downstream | 33773   | Hs.655552 | DDEF1    |
| rs10509956 | 10 | 113984142 | 0.0891 | 96.49% | 0.048960 | 0.155300 | 0.01215000 | 0.02342000 | NM_058222       | upstream   | 49341   | Hs.348615 | TECTB    |
| rs1941375  | 11 | 85434781  | 0.2616 | 97.89% | 0.007931 | 0.004976 | 0.01215000 | 0.00609600 | NM_001008660    | intron     | 0       | Hs.163893 | PICALM   |
| rs10483453 | 14 | 34965979  | 0.0996 | 89.82% | 1.000000 | 1.000000 | 0.01216000 | 0.01567000 | NM_020529       | upstream   | 22276   | Hs.81328  | NFKBIA   |
| rs10502437 | 18 | 19224704  | 0.2409 | 96.14% | 0.409900 | 0.646300 | 0.01216000 | 0.01224000 | NM_032933       | intron     | 0       | Hs.137562 | C18orf45 |
| rs10506657 | 12 | 71254449  | 0.2129 | 89.82% | 0.708800 | 0.037630 | 0.01217000 | 0.02056000 | NM_013381       | intron     | 0       | Hs.199814 | TRHDE    |
| rs10490887 | 3  | 62693701  | 0.1637 | 97.54% | 0.272000 | 0.477000 | 0.01218000 | 0.08225000 | NM_183393       | intron     | 0       | Hs.654933 | CADPS    |
| rs1560326  | 5  | 97053242  | 0.0473 | 85.26% | 0.089220 | 1.000000 | 0.01218000 | 0.00193100 | ENST00000388601 | downstream | 13029   | ---       | ---      |
| rs9316434  | 13 | 48722357  | 0.2862 | 94.39% | 0.766300 | 1.000000 | 0.01218000 | 0.04791000 | NM_030911       | intron     | 0       | Hs.388220 | CDADC1   |
| rs2227198  | 1  | 170626787 | 0.4158 | 97.89% | 0.006750 | 0.004006 | 0.01219000 | 0.11440000 | NM_015569       | intron     | 0       | Hs.654775 | DNM3     |
| rs10491253 | 5  | 127248472 | 0.0293 | 89.82% | 0.190300 | 1.000000 | 0.01224000 | 0.06738000 | ENST00000359805 | upstream   | 160489  | ---       | ---      |
| rs10487607 | 7  | 24346300  | 0.2159 | 95.09% | 0.373400 | 0.841400 | 0.01225000 | 0.01024000 | NM_000905       | downstream | 48298   | Hs.1832   | NPY      |
| rs10498616 | 14 | 87625008  | 0.2241 | 94.74% | 0.117400 | 0.226200 | 0.01225000 | 0.00607100 | NM_003608       | downstream | 76844   | Hs.513440 | GPR65    |
| rs724806   | 2  | 171110979 | 0.4963 | 95.79% | 0.115200 | 0.129000 | 0.01225000 | 0.05539000 | NM_138995       | intron     | 0       | Hs.671900 | MYO3B    |
| rs2333990  | 17 | 76399520  | 0.1150 | 96.14% | 0.374800 | 0.752000 | 0.01226000 | 0.02711000 | NM_020761       | intron     | 0       | Hs.133044 | KIAA1303 |
| rs4418789  | 11 | 12399799  | 0.4816 | 95.44% | 0.003671 | 0.049870 | 0.01226000 | 0.02811000 | NM_018222       | intron     | 0       | Hs.607144 | PARVA    |
| rs2227199  | 1  | 170626403 | 0.4131 | 90.88% | 0.202100 | 0.083370 | 0.01227000 | 0.16110000 | NM_015569       | intron     | 0       | Hs.654775 | DNM3     |
| rs4589149  | 1  | 56088549  | 0.4398 | 96.14% | 0.221500 | 0.048760 | 0.01227000 | 0.03229000 | NM_207465       | downstream | 118169  | ---       | ---      |
| rs1074946  | 13 | 58604144  | 0.2156 | 94.39% | 0.857200 | 0.544200 | 0.01228000 | 0.01799000 | ENST00000364727 | upstream   | 348060  | ---       | ---      |
| rs748549   | 12 | 124387283 | 0.4211 | 97.89% | 0.177900 | 1.000000 | 0.01229000 | 0.00315400 | NM_023928       | downstream | 193469  | Hs.656073 | AACS     |
| rs2963050  | 5  | 108032333 | 0.4873 | 82.81% | 0.000000 | 0.000001 | 0.01231000 | 0.03769000 | NM_005246       | upstream   | 79089   | Hs.221472 | FER      |
| rs4880983  | 10 | 267232    | 0.1853 | 97.54% | 0.044170 | 0.266800 | 0.01233000 | 0.02267000 | NM_212479       | intron     | 0       | Hs.292265 | ZMYND11  |
| rs10501128 | 11 | 33669411  | 0.1707 | 72.98% | 0.461200 | 0.468300 | 0.01235000 | 0.02866000 | NM_152314       | downstream | 17191   | ---       | C11orf41 |
| rs2315078  | 9  | 133001801 | 0.2109 | 96.49% | 0.017760 | 0.195300 | 0.01236000 | 0.02819000 | NM_005085       | intron     | 0       | Hs.654530 | NUP214   |
| rs10519357 | 4  | 136539097 | 0.1168 | 96.14% | 0.231900 | 0.355900 | 0.01238000 | 0.09189000 | ENST00000385114 | upstream   | 26812   | ---       | ---      |
| rs9285581  | 14 | 54156583  | 0.4599 | 96.14% | 0.903200 | 0.651000 | 0.01238000 | 0.04506000 | NM_015589       | intron     | 0       | Hs.98259  | SAMD4A   |
| rs10485030 | 6  | 37899874  | 0.1384 | 95.09% | 0.797900 | 0.420500 | 0.01239000 | 0.00663400 | NM_021943       | intron     | 0       | Hs.36959  | ZFAND3   |
| rs10494687 | 1  | 191726077 | 0.2045 | 92.63% | 0.060630 | 0.014870 | 0.01240000 | 0.08329000 | NM_024529       | downstream | 238398  | Hs.576497 | CDC73    |
| rs677794   | 11 | 81577570  | 0.3091 | 96.49% | 0.574200 | 1.000000 | 0.01240000 | 0.00853100 | ENST00000357859 | upstream   | 500679  | ---       | ---      |
| rs10489835 | 1  | 156788016 | 0.4335 | 97.54% | 0.144100 | 0.275500 | 0.01241000 | 0.07200000 | NM_001005189    | upstream   | 3497    | Hs.553780 | OR6Y1    |
| rs1562028  | 7  | 135204272 | 0.4908 | 95.44% | 1.000000 | 0.762700 | 0.01241000 | 0.02164000 | NM_145808       | downstream | 57779   | Hs.654894 | MTPN     |
| rs1361668  | 9  | 101896127 | 0.2973 | 92.63% | 0.302300 | 0.606800 | 0.01242000 | 0.02634000 | NM_015051       | intron     | 0       | Hs.591899 | TXNDC4   |
| rs2247977  | 10 | 56642818  | 0.0354 | 94.04% | 0.281400 | 1.000000 | 0.01242000 | 0.02232000 | NM_033056       | upstream   | 411761  | Hs.672170 | PCDH15   |
| rs7630783  | 3  | 134343284 | 0.3893 | 95.09% | 0.522700 | 0.411100 | 0.01243000 | 0.05656000 | NM_023943       | intron     | 0       | Hs.191616 | TMEM108  |

|            |    |           |        |        |          |          |            |            |                 |            |         |           |           |
|------------|----|-----------|--------|--------|----------|----------|------------|------------|-----------------|------------|---------|-----------|-----------|
| rs9315511  | 13 | 37249874  | 0.3180 | 95.44% | 0.161500 | 0.039180 | 0.01243000 | 0.06747000 | NM_016179       | intron     | 0       | Hs.262960 | TRPC4     |
| rs10493348 | 1  | 63918978  | 0.0323 | 81.40% | 0.208300 | 1.000000 | 0.01244000 | 0.01114000 | NM_002633       | downstream | 20474   | Hs.1869   | PGM1      |
| rs10512279 | 9  | 103106701 | 0.3491 | 92.98% | 0.685000 | 1.000000 | 0.01247000 | 0.12180000 | NM_017753       | intron     | 0       | Hs.382683 | RP11-35N6 |
| rs1149000  | 12 | 70280349  | 0.3967 | 95.09% | 0.899700 | 0.649400 | 0.01247000 | 0.01515000 | NM_144982       | downstream | 9302    | Hs.527874 | CCDC131   |
| rs10503450 | 8  | 13261245  | 0.1152 | 89.82% | 0.350200 | 0.124300 | 0.01249000 | 0.03367000 | NM_024767       | intron     | 0       | Hs.134296 | DLC1      |
| rs1368119  | 4  | 70438785  | 0.2717 | 96.84% | 0.447000 | 0.480000 | 0.01249000 | 0.14590000 | NM_021139       | upstream   | 42573   | Hs.285887 | UGT2B4    |
| rs1014772  | 5  | 102816580 | 0.1771 | 95.09% | 0.297800 | 0.221400 | 0.01250000 | 0.10100000 | NM_031438       | downstream | 95875   | Hs.434289 | NUDT12    |
| rs7196791  | 16 | 25664089  | 0.0434 | 92.98% | 1.000000 | 1.000000 | 0.01253000 | 0.01825000 | NM_006040       | intron     | 0       | Hs.655275 | HS3ST4    |
| rs10501586 | 11 | 84433725  | 0.2566 | 93.68% | 0.151300 | 0.049780 | 0.01254000 | 0.02582000 | ENST00000376104 | intron     | 0       | ---       | ---       |
| rs10493631 | 1  | 80250468  | 0.3645 | 95.79% | 0.434900 | 0.490700 | 0.01256000 | 0.08139000 | ENST00000370739 | upstream   | 1005518 | ---       | ---       |
| rs7981837  | 13 | 70842044  | 0.4640 | 82.81% | 0.036050 | 0.738200 | 0.01257000 | 0.10360000 | NM_004392       | downstream | 68055   | Hs.129452 | DACH1     |
| rs1123391  | 5  | 2029478   | 0.3473 | 91.93% | 0.223000 | 0.856800 | 0.01258000 | 0.06091000 | NM_016358       | upstream   | 93598   | Hs.196927 | IRX4      |
| rs951265   | 15 | 59077153  | 0.4477 | 97.19% | 0.716500 | 0.756600 | 0.01266000 | 0.01266000 | NM_134261       | intron     | 0       | Hs.695914 | RORA      |
| rs4979802  | 10 | 79566202  | 0.4072 | 92.63% | 0.125700 | 0.536800 | 0.01267000 | 0.02187000 | NM_001026       | downstream | 95725   | Hs.356794 | RPS24     |
| rs724334   | 3  | 55933122  | 0.4057 | 92.98% | 0.798800 | 1.000000 | 0.01267000 | 0.00664100 | NM_015576       | intron     | 0       | Hs.476389 | ERC2      |
| rs7996782  | 13 | 38937224  | 0.4927 | 96.14% | 0.070660 | 0.066310 | 0.01268000 | 0.07819000 | NM_005780       | intron     | 0       | Hs.507798 | LHFP      |
| rs10520144 | 15 | 37730935  | 0.0282 | 93.33% | 1.000000 | 1.000000 | 0.01272000 | 0.01378000 | NM_152597       | intron     | 0       | Hs.129598 | FSIP1     |
| rs10509948 | 10 | 113479039 | 0.1169 | 97.54% | 0.034680 | 0.150500 | 0.01275000 | 0.02138000 | NM_020918       | downstream | 420575  | Hs.42586  | GPAM      |
| rs1995358  | 5  | 134736955 | 0.1245 | 94.39% | 0.395900 | 0.382100 | 0.01275000 | 0.04991000 | NM_001040158    | intron     | 0       | Hs.696013 | H2AFY     |
| rs9309416  | 2  | 68459224  | 0.4458 | 97.19% | 0.007645 | 0.006588 | 0.01276000 | 0.06037000 | NM_002664       | intron     | 0       | Hs.468840 | PLEK      |
| rs1355296  | 15 | 34027338  | 0.0484 | 97.89% | 1.000000 | 1.000000 | 0.01279000 | 0.13310000 | NM_080650       | upstream   | 401682  | Hs.107196 | ATPBD4    |
| rs6098304  | 20 | 52945008  | 0.2603 | 93.68% | 0.114600 | 0.381000 | 0.01279000 | 0.01354000 | ENST00000388080 | upstream   | 35250   | ---       | ---       |
| rs1982937  | 12 | 129434048 | 0.1036 | 88.07% | 0.735600 | 1.000000 | 0.01280000 | 0.03228000 | NM_004764       | downstream | 11223   | Hs.405659 | PWIL1     |
| rs2190547  | 17 | 66441030  | 0.2384 | 97.89% | 0.741300 | 0.647000 | 0.01281000 | 0.05943000 | NM_000891       | downstream | 753275  | Hs.1547   | KCNJ2     |
| rs2304510  | 3  | 14495564  | 0.2019 | 94.74% | 0.850500 | 0.420600 | 0.01283000 | 0.01511000 | NM_003043       | intron     | 0       | Hs.529488 | SLC6A6    |
| rs2891097  | 2  | 1892286   | 0.1256 | 76.84% | 0.030160 | 0.362400 | 0.01287000 | 0.02319000 | NM_015025       | intron     | 0       | Hs.434418 | MYT1L     |
| rs2641998  | 9  | 584262    | 0.3152 | 96.84% | 0.486300 | 0.513800 | 0.01288000 | 0.01027000 | NM_015158       | intron     | 0       | Hs.306764 | ANKRD15   |
| rs6989402  | 8  | 89460062  | 0.1381 | 94.04% | 0.066140 | 0.092910 | 0.01288000 | 0.01087000 | NM_022564       | upstream   | 51170   | Hs.546267 | MMP16     |
| rs1347637  | 3  | 21283719  | 0.4462 | 97.89% | 0.627800 | 0.765700 | 0.01289000 | 0.00087220 | ENST00000295509 | upstream   | 138805  | ---       | ---       |
| rs10496769 | 2  | 137797535 | 0.0506 | 93.68% | 0.499400 | 1.000000 | 0.01291000 | 0.00909300 | ENST00000272643 | intron     | 0       | ---       | ---       |
| rs10500988 | 11 | 24706400  | 0.3615 | 97.54% | 0.242200 | 0.439400 | 0.01292000 | 0.06527000 | NM_001009909    | intron     | 0       | Hs.144138 | LUZP2     |
| rs291296   | 9  | 10103900  | 0.4130 | 88.77% | 0.153200 | 0.876500 | 0.01293000 | 0.00048190 | ENST00000363183 | downstream | 671548  | ---       | ---       |
| rs436563   | 9  | 10090851  | 0.4534 | 97.89% | 0.091030 | 0.122400 | 0.01300000 | 0.00060520 | ENST00000363183 | downstream | 658499  | ---       | ---       |
| rs210646   | 6  | 117948723 | 0.3224 | 90.88% | 0.776400 | 1.000000 | 0.01301000 | 0.00752900 | NM_173674       | intron     | 0       | Hs.658304 | DCBLD1    |
| rs10517774 | 4  | 164011156 | 0.3561 | 92.63% | 0.140700 | 0.007897 | 0.01302000 | 0.00397300 | NM_138386       | downstream | 258119  | Hs.655698 | LOC92345  |
| rs2056933  | 20 | 8023613   | 0.3140 | 90.53% | 0.665100 | 0.497700 | 0.01302000 | 0.05983000 | NM_182734       | upstream   | 37295   | Hs.431173 | PLCB1     |
| rs1920267  | 3  | 190853682 | 0.0266 | 85.61% | 1.000000 | 1.000000 | 0.01304000 | 0.02732000 | NM_003722       | intron     | 0       | Hs.137569 | TP63      |
| rs3762982  | 5  | 76359244  | 0.2426 | 82.46% | 0.154400 | 0.420700 | 0.01306000 | 0.03911000 | NM_018046       | upstream   | 2743    | Hs.634849 | AGGF1     |
| rs10821851 | 10 | 62330917  | 0.2963 | 94.74% | 0.558900 | 0.866700 | 0.01307000 | 0.02108000 | NM_001032380    | intron     | 0       | Hs.148670 | RHOBTB1   |
| rs334960   | 3  | 18585881  | 0.2457 | 82.11% | 0.376600 | 0.237200 | 0.01308000 | 0.00686900 | NM_002971       | upstream   | 130673  | Hs.517717 | SATB1     |
| rs10501446 | 11 | 78920460  | 0.0739 | 92.63% | 0.639800 | 0.649800 | 0.01309000 | 0.06195000 | ENST00000385066 | upstream   | 129643  | ---       | ---       |
| rs1186892  | 2  | 61813727  | 0.2762 | 97.19% | 0.232800 | 0.600100 | 0.01313000 | 0.12230000 | NM_032180       | downstream | 91767   | Hs.440466 | FLJ13305  |
| rs1476322  | 3  | 162928749 | 0.4213 | 82.46% | 0.001255 | 0.000003 | 0.01313000 | 0.02085000 | ENST00000327928 | downstream | 224325  | ---       | ---       |
| rs9301388  | 13 | 108934565 | 0.4801 | 97.19% | 0.547900 | 0.880600 | 0.01314000 | 0.01859000 | NM_003749       | downstream | 269620  | Hs.442344 | IRS2      |
| rs2339575  | 10 | 66307284  | 0.0582 | 96.49% | 1.000000 | 1.000000 | 0.01315000 | 0.00862500 | NM_013266       | downstream | 1042441 | Hs.660362 | CTNNA3    |
| rs10497423 | 2  | 174555939 | 0.3448 | 87.02% | 0.000224 | 0.001441 | 0.01316000 | 0.07414000 | NM_001017371    | upstream   | 17263   | Hs.531587 | SP3       |
| rs10494831 | 1  | 200165397 | 0.3599 | 90.18% | 0.222700 | 0.472700 | 0.01318000 | 0.11040000 | NM_012134       | intron     | 0       | Hs.519075 | LMOD1     |
| rs4935578  | 10 | 56567867  | 0.1931 | 97.19% | 0.702700 | 0.830100 | 0.01327000 | 0.00903300 | NM_033056       | upstream   | 336810  | Hs.672170 | PCDH15    |
| rs532188   | 6  | 100251871 | 0.1794 | 91.93% | 0.528100 | 0.204700 | 0.01331000 | 0.07740000 | NM_032503       | downstream | 222636  | Hs.591342 | MCHR2     |
| rs6107905  | 20 | 6927153   | 0.2030 | 95.09% | 0.709800 | 0.605200 | 0.01333000 | 0.01854000 | NM_001200       | downstream | 218226  | Hs.73853  | BMP2      |
| rs1370105  | 10 | 128272934 | 0.1326 | 97.89% | 1.000000 | 0.576700 | 0.01335000 | 0.02892000 | NM_001004298    | upstream   | 72934   | Hs.587663 | C10orf90  |
| rs725550   | 6  | 18444756  | 0.1326 | 97.89% | 1.000000 | 1.000000 | 0.01335000 | 0.01217000 | NM_182757       | upstream   | 50817   | Hs.148741 | RNF144B   |
| rs7151164  | 14 | 88045426  | 0.2110 | 92.28% | 0.264300 | 0.298900 | 0.01336000 | 0.05406000 | NM_007039       | intron     | 0       | Hs.437040 | PTPN21    |
| rs10520301 | 4  | 176797085 | 0.4910 | 97.54% | 0.632600 | 0.451300 | 0.01337000 | 0.05086000 | NM_201592       | intron     | 0       | Hs.75819  | GPM6A     |

|            |    |           |        |        |          |          |            |            |                 |            |         |           |           |
|------------|----|-----------|--------|--------|----------|----------|------------|------------|-----------------|------------|---------|-----------|-----------|
| rs7673719  | 4  | 172319664 | 0.2437 | 97.19% | 0.142800 | 0.066130 | 0.01339000 | 0.06832000 | NM_001034845    | upstream   | 652643  | Hs.386236 | GALNT17   |
| rs10519383 | 4  | 137334697 | 0.1492 | 90.53% | 0.013690 | 0.017540 | 0.01341000 | 0.01766000 | ENST00000311003 | downstream | 161021  | ---       | ---       |
| rs10516162 | 4  | 57631677  | 0.1516 | 97.19% | 0.159600 | 0.209000 | 0.01343000 | 0.00729500 | NM_001553       | intron     | 0       | Hs.479808 | IGFBP7    |
| rs10505484 | 8  | 128170494 | 0.2556 | 94.74% | 0.266800 | 0.268000 | 0.01344000 | 0.01378000 | ENST00000385818 | downstream | 417413  | ---       | ---       |
| rs10511305 | 3  | 113296986 | 0.0681 | 97.89% | 0.028390 | 0.328600 | 0.01344000 | 0.27180000 | NM_024616       | intron     | 0       | Hs.434247 | C3orf52   |
| rs10509309 | 10 | 70497287  | 0.2727 | 84.91% | 0.196300 | 0.077150 | 0.01346000 | 0.03559000 | NM_002727       | upstream   | 20547   | Hs.1908   | SRGN      |
| rs511217   | 11 | 29986524  | 0.1833 | 94.74% | 0.418300 | 0.658400 | 0.01347000 | 0.02531000 | NM_002233       | downstream | 1817    | Hs.592002 | CKNA4     |
| rs10501247 | 11 | 41032784  | 0.0606 | 92.63% | 1.000000 | 1.000000 | 0.01349000 | 0.02785000 | ENST00000386948 | downstream | 68261   | ---       | ---       |
| rs1463073  | 11 | 41574517  | 0.1796 | 94.74% | 0.095320 | 0.066130 | 0.01351000 | 0.03918000 | NM_006595       | upstream   | 1715592 | Hs.435771 | API5      |
| rs2639277  | 3  | 81175378  | 0.3090 | 93.68% | 0.151100 | 0.002095 | 0.01351000 | 0.00506000 | NM_000158       | downstream | 446164  | Hs.436062 | GBE1      |
| rs2683408  | 4  | 63554481  | 0.1224 | 85.96% | 0.000000 | 0.000075 | 0.01351000 | 0.10130000 | NM_001010874    | downstream | 1273904 | Hs.227752 | SRD5A2L2  |
| rs6713940  | 2  | 50037876  | 0.3489 | 94.04% | 0.893800 | 0.860300 | 0.01351000 | 0.01705000 | NM_138735       | intron     | 0       | Hs.637685 | NRXN1     |
| rs836019   | 4  | 172912358 | 0.0914 | 97.89% | 0.063520 | 0.255200 | 0.01352000 | 0.00625500 | NM_001034845    | upstream   | 59949   | Hs.386236 | GALNT17   |
| rs1073893  | 2  | 108855797 | 0.1709 | 97.54% | 0.673700 | 0.755100 | 0.01353000 | 0.09846000 | NM_144978       | intron     | 0       | Hs.362702 | CCDC138   |
| rs7356548  | 5  | 129751451 | 0.4272 | 94.04% | 0.803200 | 0.874000 | 0.01354000 | 0.03856000 | NM_005340       | downstream | 771432  | Hs.483305 | LINT1     |
| rs10493722 | 1  | 82944582  | 0.1516 | 89.12% | 0.324900 | 0.277100 | 0.01355000 | 0.03019000 | NM_012302       | downstream | 713887  | Hs.24212  | HPHN2     |
| rs7320767  | 13 | 88932399  | 0.3755 | 97.19% | 0.369400 | 0.095080 | 0.01355000 | 0.01617000 | ENST00000298437 | upstream   | 120609  | ---       | ---       |
| rs10502906 | 18 | 45928041  | 0.0896 | 97.89% | 0.470300 | 0.462800 | 0.01356000 | 0.13650000 | ENST00000285039 | intron     | 0       | ---       | ---       |
| rs1033147  | 13 | 103460337 | 0.2981 | 94.74% | 0.662700 | 1.000000 | 0.01358000 | 0.00474700 | NM_000452       | upstream   | 943140  | Hs.194783 | SLC10A2   |
| rs10504421 | 8  | 69270284  | 0.0598 | 96.84% | 0.608700 | 0.604500 | 0.01358000 | 0.03961000 | NM_024870       | intron     | 0       | Hs.591867 | DEPDC2    |
| rs10512260 | 9  | 100544496 | 0.0074 | 95.09% | 1.000000 | 1.000000 | 0.01358000 | 0.99870000 | NM_173551       | intron     | 0       | Hs.406890 | ANKS6     |
| rs10516992 | 4  | 97722954  | 0.0074 | 95.09% | 1.000000 | 1.000000 | 0.01358000 | 0.99860000 | ENST00000364967 | downstream | 116548  | ---       | ---       |
| rs1240584  | 6  | 16841472  | 0.0074 | 95.09% | 1.000000 | 1.000000 | 0.01358000 | 0.99840000 | NM_000332       | intron     | 0       | Hs.434961 | ATXN1     |
| rs176713   | 6  | 90727835  | 0.1183 | 97.89% | 0.561300 | 0.646300 | 0.01358000 | 0.06011000 | NM_021813       | intron     | 0       | Hs.269764 | BACH2     |
| rs929710   | 12 | 4392161   | 0.0074 | 95.09% | 0.011080 | 1.000000 | 0.01358000 | 0.99840000 | NM_020996       | downstream | 21408   | Hs.166015 | FGF6      |
| rs10507549 | 13 | 46512093  | 0.1008 | 90.53% | 0.304000 | 0.726400 | 0.01359000 | 0.02245000 | ENST00000386918 | upstream   | 82655   | ---       | ---       |
| rs1222410  | 7  | 133489096 | 0.0075 | 94.04% | 1.000000 | 1.000000 | 0.01359000 | 0.99840000 | NM_144648       | intron     | 0       | Hs.149774 | LRGUK     |
| rs748138   | 5  | 84977466  | 0.3235 | 83.51% | 0.374900 | 0.076850 | 0.01359000 | 0.00798400 | ENST00000333189 | downstream | 95942   | ---       | ---       |
| rs9299191  | 9  | 112904366 | 0.3614 | 93.68% | 0.691300 | 0.732000 | 0.01360000 | 0.14180000 | NM_205859       | downstream | 225218  | Hs.381312 | OR2K2     |
| rs2570024  | 3  | 483467    | 0.4513 | 93.68% | 0.216900 | 0.448000 | 0.01363000 | 0.00421000 | NM_006614       | downstream | 57369   | Hs.148909 | CHL1      |
| rs10507629 | 13 | 58612935  | 0.0683 | 97.54% | 1.000000 | 1.000000 | 0.01366000 | 0.05896000 | ENST00000364727 | upstream   | 339269  | ---       | ---       |
| rs10511749 | 9  | 24209684  | 0.0281 | 93.68% | 0.183000 | 0.243300 | 0.01367000 | 0.06142000 | NM_004432       | upstream   | 393349  | Hs.166109 | ELAVL2    |
| rs1359380  | 10 | 91633288  | 0.4850 | 93.68% | 0.902700 | 0.878700 | 0.01367000 | 0.03539000 | NM_016195       | downstream | 108608  | Hs.240    | MPHOSPH1  |
| rs2703813  | 17 | 20055907  | 0.2860 | 82.81% | 0.751400 | 0.274300 | 0.01369000 | 0.01755000 | NM_001033553    | intron     | 0       | Hs.431045 | SPECC1    |
| rs719614   | 13 | 48743486  | 0.2808 | 96.84% | 0.765400 | 0.838900 | 0.01369000 | 0.04986000 | NM_030911       | intron     | 0       | Hs.388220 | CDADC1    |
| rs7715468  | 5  | 162484076 | 0.4139 | 93.68% | 0.129600 | 0.192900 | 0.01370000 | 0.10760000 | NM_199246       | upstream   | 313079  | Hs.79101  | CCNG1     |
| rs9326835  | 5  | 110802124 | 0.2855 | 96.49% | 0.657700 | 0.236100 | 0.01370000 | 0.03521000 | NM_001744       | intron     | 0       | Hs.591269 | CAMK4     |
| rs10493029 | 1  | 26425552  | 0.0730 | 93.68% | 1.000000 | 1.000000 | 0.01374000 | 0.00538800 | NM_022778       | upstream   | 7728    | Hs.63795  | CCDC21    |
| rs471095   | 9  | 22730332  | 0.3123 | 91.58% | 0.773400 | 0.497700 | 0.01374000 | 0.01723000 | NM_022160       | downstream | 287860  | Hs.371976 | DMRTA1    |
| rs10498403 | 14 | 47966988  | 0.1093 | 94.74% | 0.025540 | 0.354900 | 0.01375000 | 0.09387000 | ENST00000384636 | upstream   | 86703   | ---       | ---       |
| rs10490433 | 2  | 16934254  | 0.2325 | 95.09% | 0.398800 | 0.641100 | 0.01376000 | 0.04157000 | ENST00000386331 | downstream | 34498   | ---       | ---       |
| rs10520627 | 15 | 84779592  | 0.0074 | 94.74% | 1.000000 | 1.000000 | 0.01378000 | 0.99860000 | ENST00000389298 | intron     | 0       | ---       | ---       |
| rs4947673  | 7  | 52022186  | 0.3325 | 67.02% | 0.033130 | 0.092700 | 0.01378000 | 0.02782000 | ENST00000388001 | downstream | 270066  | ---       | ---       |
| rs9307757  | 4  | 138096276 | 0.0074 | 94.74% | 1.000000 | 1.000000 | 0.01378000 | 0.99860000 | ENST00000364398 | downstream | 537503  | ---       | ---       |
| rs10520694 | 15 | 89701629  | 0.1889 | 91.93% | 0.839800 | 0.822900 | 0.01381000 | 0.04003000 | NM_013272       | upstream   | 496321  | Hs.311187 | SLCO3A1   |
| rs16928254 | 9  | 11942979  | 0.0076 | 92.63% | 1.000000 | 1.000000 | 0.01381000 | 0.99850000 | ENST00000364783 | downstream | 347291  | ---       | ---       |
| rs2063345  | 6  | 160780144 | 0.2689 | 83.51% | 0.000000 | 0.000013 | 0.01381000 | 0.01575000 | NM_021977       | intron     | 0       | Hs.567337 | SLC22A3   |
| rs10508091 | 13 | 102040254 | 0.1119 | 94.04% | 1.000000 | 0.746100 | 0.01384000 | 0.05338000 | NM_003291       | upstream   | 7033    | Hs.432424 | TPP2      |
| rs1361251  | 9  | 102682223 | 0.3873 | 96.49% | 0.702900 | 0.877600 | 0.01384000 | 0.01267000 | NM_001018116    | downstream | 292231  | Hs.99004  | LOC347273 |
| rs2742347  | 2  | 179308893 | 0.1461 | 93.68% | 0.808200 | 0.709800 | 0.01384000 | 0.08988000 | NM_133437       | intron     | 0       | Hs.654592 | TTN       |
| rs4918563  | 10 | 112448484 | 0.1692 | 92.28% | 0.075200 | 0.025590 | 0.01385000 | 0.00810600 | ENST00000369521 | intron     | 0       | ---       | ---       |
| rs964248   | 5  | 94389593  | 0.0265 | 85.96% | 1.000000 | 1.000000 | 0.01385000 | 0.00139000 | NM_001002796    | intron     | 0       | Hs.655087 | MCTP1     |
| rs1561288  | 2  | 25222506  | 0.3466 | 88.07% | 0.209000 | 0.580500 | 0.01387000 | 0.02505000 | ENST00000264719 | intron     | 0       | ---       | ---       |
| rs7829812  | 8  | 89791390  | 0.2176 | 97.54% | 0.727000 | 1.000000 | 0.01387000 | 0.05318000 | NM_003821       | upstream   | 1047783 | Hs.103755 | RIPK2     |



|            |    |           |        |        |          |          |            |            |                 |            |        |           |          |
|------------|----|-----------|--------|--------|----------|----------|------------|------------|-----------------|------------|--------|-----------|----------|
| rs10510927 | 3  | 64725784  | 0.4059 | 89.47% | 0.004348 | 0.211000 | 0.01388000 | 0.15300000 | NM_182920       | upstream   | 77379  | Hs.656071 | ADAMTS9  |
| rs1012566  | 2  | 11900734  | 0.3877 | 96.84% | 0.255100 | 0.441900 | 0.01389000 | 0.18420000 | NM_145693       | downstream | 15752  | Hs.467740 | LPIN1    |
| rs1486988  | 4  | 135508554 | 0.2948 | 88.07% | 1.000000 | 0.541300 | 0.01389000 | 0.02008000 | ENST00000386270 | downstream | 578648 | ---       | ---      |
| rs2890982  | 9  | 14171653  | 0.1935 | 97.89% | 0.702400 | 0.175800 | 0.01389000 | 0.00625400 | NM_005596       | intron     | 0      | Hs.644095 | NFIB     |
| rs2572116  | 6  | 99589485  | 0.0970 | 94.04% | 0.723400 | 0.717600 | 0.01390000 | 0.00564800 | NM_012160       | upstream   | 86915  | Hs.536850 | FBXL4    |
| rs9291500  | 4  | 27145506  | 0.3273 | 96.49% | 0.338700 | 0.463100 | 0.01391000 | 0.02143000 | ENST00000363691 | upstream   | 311359 | ---       | ---      |
| rs984441   | 8  | 139146659 | 0.2212 | 97.54% | 1.000000 | 0.693200 | 0.01391000 | 0.01007000 | NM_015912       | downstream | 67049  | Hs.126024 | FAM135B  |
| rs10497454 | 2  | 176971096 | 0.1107 | 95.09% | 0.754400 | 0.745400 | 0.01392000 | 0.01479000 | NM_001006635    | downstream | 60099  | Hs.470728 | MTX2     |
| rs360388   | 2  | 126837503 | 0.0830 | 95.09% | 0.702700 | 1.000000 | 0.01392000 | 0.08301000 | NM_016815       | upstream   | 327041 | Hs.59138  | GYPC     |
| rs720651   | 13 | 25129946  | 0.3763 | 97.89% | 0.525200 | 0.617400 | 0.01392000 | 0.01498000 | NM_016529       | intron     | 0      | Hs.444957 | ATP8A2   |
| rs1841579  | 6  | 58594201  | 0.2678 | 93.68% | 0.353200 | 0.832000 | 0.01393000 | 0.00769600 | NM_206908       | upstream   | 198546 | ---       | GUSBL2   |
| rs10491441 | 5  | 58924994  | 0.1605 | 95.09% | 0.651500 | 0.514400 | 0.01394000 | 0.09130000 | ENST00000340635 | intron     | 0      | ---       | ---      |
| rs2290445  | 2  | 39068325  | 0.0642 | 90.18% | 1.000000 | 1.000000 | 0.01394000 | 0.00272300 | NM_005633       | intron     | 0      | Hs.654397 | SOS1     |
| rs10515778 | 5  | 158590590 | 0.1015 | 91.58% | 0.735800 | 0.732100 | 0.01400000 | 0.02756000 | NM_145049       | upstream   | 32267  | Hs.591733 | UBLCP1   |
| rs1462395  | 14 | 46195273  | 0.0240 | 95.09% | 1.000000 | 1.000000 | 0.01401000 | 0.04569000 | NM_080746       | upstream   | 4584   | Hs.308332 | RPL10L   |
| rs2305516  | 2  | 39052470  | 0.0849 | 95.09% | 0.704200 | 0.697400 | 0.01401000 | 0.00224500 | NM_005633       | downstream | 13999  | Hs.654397 | SOS1     |
| rs3922595  | 12 | 24250039  | 0.0240 | 95.09% | 0.137000 | 0.016880 | 0.01401000 | 0.09329000 | NM_144667       | downstream | 377781 | Hs.350668 | FLJ32894 |
| rs10500961 | 11 | 23505379  | 0.1721 | 96.84% | 0.403300 | 1.000000 | 0.01405000 | 0.00493000 | ENST00000386849 | upstream   | 322518 | ---       | ---      |
| rs723597   | 8  | 51907361  | 0.3781 | 97.89% | 0.799300 | 0.644400 | 0.01405000 | 0.04165000 | NM_018967       | downstream | 39383  | Hs.584914 | SNTG1    |
| rs10488670 | 13 | 29772175  | 0.0412 | 97.89% | 1.000000 | 1.000000 | 0.01406000 | 0.02537000 | NM_001014380    | intron     | 0      | Hs.243596 | KATNAL1  |
| rs10518080 | 4  | 72103624  | 0.0412 | 97.89% | 0.376600 | 1.000000 | 0.01406000 | 0.23950000 | NM_000788       | intron     | 0      | Hs.709    | DCK      |
| rs1446821  | 2  | 176342447 | 0.0412 | 97.89% | 0.376600 | 0.097890 | 0.01406000 | 0.00825700 | NM_030650       | downstream | 154449 | Hs.209561 | KIAA1715 |
| rs9317195  | 13 | 61121561  | 0.0412 | 97.89% | 0.376600 | 0.097890 | 0.01406000 | 0.00535200 | NM_022843       | upstream   | 234164 | Hs.391781 | PCDH20   |
| rs3750300  | 1  | 17458721  | 0.1016 | 89.82% | 0.007717 | 0.143900 | 0.01408000 | 0.00275600 | NM_016233       | CDS        | 0      | Hs.149195 | PADI3    |
| rs721231   | 1  | 156017335 | 0.1985 | 95.44% | 0.850700 | 0.789800 | 0.01409000 | 0.05806000 | NM_030764       | upstream   | 3799   | Hs.437393 | FCRL2    |
| rs9321615  | 6  | 137880908 | 0.1387 | 96.14% | 0.443600 | 1.000000 | 0.01409000 | 0.00876300 | NM_175747       | upstream   | 23828  | Hs.195398 | OLIG3    |
| rs936868   | 4  | 72110999  | 0.0417 | 96.84% | 0.379900 | 1.000000 | 0.01410000 | 0.24700000 | NM_000788       | intron     | 0      | Hs.709    | DCK      |
| rs2071114  | 11 | 2937407   | 0.1849 | 92.98% | 0.105700 | 0.245900 | 0.01412000 | 0.09314000 | NM_005969       | intron     | 0      | Hs.501684 | NAP1L4   |
| rs2399669  | 10 | 11303519  | 0.1264 | 92.98% | 1.000000 | 1.000000 | 0.01412000 | 0.06372000 | NM_001025077    | intron     | 0      | Hs.309288 | CUGBP2   |
| rs10488086 | 7  | 30083942  | 0.2204 | 97.89% | 0.294600 | 0.046740 | 0.01413000 | 0.01487000 | NM_015899       | intron     | 0      | Hs.558495 | PLEKHA9  |
| rs2251775  | 2  | 183696844 | 0.0637 | 93.68% | 0.014520 | 0.018860 | 0.01417000 | 0.06279000 | NM_001008544    | upstream   | 484    | ---       | NUP35    |
| rs1004704  | 16 | 47094922  | 0.3327 | 91.23% | 0.263300 | 0.463100 | 0.01419000 | 0.03184000 | NM_153029       | downstream | 35218  | Hs.511839 | N4BP1    |
| rs1354038  | 10 | 57503697  | 0.4777 | 94.39% | 0.807200 | 0.450000 | 0.01421000 | 0.01458000 | NM_001005414    | downstream | 283508 | ---       | ZWINT    |
| rs1564269  | 5  | 40338324  | 0.4646 | 94.04% | 0.623500 | 0.536000 | 0.01421000 | 0.02015000 | ENST00000362491 | downstream | 32746  | ---       | ---      |
| rs798285   | 7  | 77777932  | 0.4777 | 94.39% | 0.087220 | 0.049170 | 0.01421000 | 0.00268300 | NM_012301       | intron     | 0      | Hs.654788 | MAGI2    |
| rs495236   | 18 | 64998152  | 0.4631 | 95.09% | 0.713800 | 0.645100 | 0.01423000 | 0.00722900 | NM_152721       | upstream   | 221119 | Hs.569915 | DOK6     |
| rs2028165  | 5  | 106100920 | 0.1141 | 84.56% | 0.000000 | 0.000000 | 0.01425000 | 0.08062000 | NM_001962       | downstream | 639569 | Hs.658451 | EFNA5    |
| rs3024490  | 1  | 205011934 | 0.3412 | 89.47% | 0.890100 | 0.249000 | 0.01425000 | 0.00475100 | NM_000572       | intron     | 0      | Hs.193717 | IL10     |
| rs3734369  | 6  | 71625850  | 0.0704 | 94.74% | 1.000000 | 1.000000 | 0.01426000 | 0.03840000 | NM_021940       | intron     | 0      | Hs.485717 | SMAP1    |
| rs6495808  | 15 | 34038553  | 0.2135 | 93.68% | 0.199700 | 0.543700 | 0.01426000 | 0.02344000 | NM_080650       | upstream   | 412897 | Hs.107196 | ATPBD4   |
| rs1941891  | 18 | 24850496  | 0.2306 | 95.09% | 0.391900 | 0.442000 | 0.01427000 | 0.02570000 | NM_001792       | upstream   | 839307 | Hs.464829 | CDH2     |
| rs2181246  | 6  | 76600038  | 0.5000 | 94.39% | 0.179500 | 0.288000 | 0.01428000 | 0.07261000 | NM_004999       | intron     | 0      | Hs.149387 | MYO6     |
| rs1048821  | 2  | 138151484 | 0.2832 | 97.89% | 0.556400 | 0.087600 | 0.01431000 | 0.02038000 | ENST00000272643 | 3UTR       | 0      | ---       | ---      |
| rs10508344 | 10 | 8262218   | 0.1125 | 95.09% | 0.758200 | 0.624300 | 0.01431000 | 0.03113000 | NM_002051       | downstream | 105048 | Hs.524134 | GATA3    |
| rs4749562  | 10 | 30858830  | 0.1891 | 93.68% | 0.842300 | 0.825900 | 0.01432000 | 0.02926000 | NM_005204       | downstream | 68063  | Hs.432453 | MAP3K8   |
| rs4767212  | 12 | 113012888 | 0.2518 | 96.84% | 1.000000 | 0.824900 | 0.01432000 | 0.03733000 | NM_016196       | upstream   | 124394 | Hs.7482   | RBM19    |
| rs10485352 | 6  | 106854904 | 0.2753 | 93.68% | 0.045290 | 0.101100 | 0.01433000 | 0.04044000 | NM_004849       | intron     | 0      | Hs.486063 | ATG5     |
| rs2124432  | 2  | 128900636 | 0.3170 | 92.98% | 0.672600 | 1.000000 | 0.01435000 | 0.00291400 | ENST00000362822 | downstream | 18489  | ---       | ---      |
| rs1418259  | 20 | 167011    | 0.5000 | 94.74% | 0.544200 | 0.652000 | 0.01437000 | 0.00263000 | NM_080831       | downstream | 8484   | Hs.112087 | DEFB129  |
| rs947808   | 11 | 62984635  | 0.0293 | 95.79% | 0.017000 | 0.030360 | 0.01437000 | 0.05180000 | NM_054108       | downstream | 2751   | Hs.410316 | HRASLS5  |
| rs2408412  | 5  | 55900767  | 0.0290 | 96.84% | 1.000000 | 1.000000 | 0.01438000 | 0.05545000 | ENST00000381279 | intron     | 0      | ---       | ---      |
| rs2059743  | 3  | 16604325  | 0.2708 | 92.63% | 0.876200 | 0.522500 | 0.01439000 | 0.03477000 | NM_001351       | 3UTR       | 0      | Hs.131179 | DAZL     |
| rs10485732 | 20 | 9467529   | 0.0288 | 97.54% | 1.000000 | 1.000000 | 0.01441000 | 0.06175000 | NM_177990       | 3UTR       | 0      | Hs.32539  | PAK7     |
| rs10504709 | 8  | 80781919  | 0.2795 | 92.28% | 0.219600 | 0.414500 | 0.01442000 | 0.11170000 | NM_007029       | downstream | 40988  | Hs.521651 | STMN2    |

|            |    |           |        |        |          |          |            |            |                 |            |         |           |           |
|------------|----|-----------|--------|--------|----------|----------|------------|------------|-----------------|------------|---------|-----------|-----------|
| rs461721   | 5  | 100835207 | 0.4259 | 94.74% | 0.804000 | 0.760000 | 0.01442000 | 0.00288600 | ENST00000388691 | upstream   | 110226  | ---       | ---       |
| rs4678221  | 3  | 138252492 | 0.3090 | 93.68% | 0.668200 | 0.403600 | 0.01442000 | 0.00305800 | NM_144717       | downstream | 39882   | Hs.61232  | IL20RB    |
| rs2843780  | 8  | 37401206  | 0.1870 | 94.74% | 0.071990 | 0.121000 | 0.01444000 | 0.07268000 | NM_021631       | downstream | 535220  | Hs.651853 | FKSG2     |
| rs10516343 | 4  | 19583960  | 0.2554 | 96.84% | 0.343800 | 0.278800 | 0.01445000 | 0.02028000 | NM_004787       | upstream   | 280373  | Hs.699467 | SLIT2     |
| rs268086   | 5  | 39515041  | 0.2964 | 88.77% | 1.000000 | 0.541800 | 0.01447000 | 0.06098000 | NM_001343       | upstream   | 54338   | Hs.481980 | DAB2      |
| rs1438524  | 1  | 189066548 | 0.4648 | 94.74% | 0.066430 | 0.090280 | 0.01448000 | 0.03097000 | NM_199051       | upstream   | 353166  | Hs.65765  | FAM5C     |
| rs2385861  | 3  | 46904357  | 0.0271 | 97.19% | 1.000000 | 1.000000 | 0.01448000 | 0.08795000 | NM_000316       | intron     | 0       | Hs.1019   | PTHR1     |
| rs347163   | 3  | 32435579  | 0.4594 | 95.09% | 0.465200 | 0.758300 | 0.01449000 | 0.07714000 | NM_181472       | intron     | 0       | Hs.440494 | CMTM7     |
| rs2466605  | 11 | 123605456 | 0.4079 | 97.19% | 0.901000 | 0.880500 | 0.01454000 | 0.02719000 | NM_001007249    | downstream | 3881    | Hs.381319 | OR8G2     |
| rs10506322 | 12 | 52541474  | 0.1852 | 94.74% | 0.839600 | 0.823100 | 0.01458000 | 0.00834600 | NM_017410       | upstream   | 77369   | Hs.118608 | HOXC13    |
| rs4503638  | 12 | 69534032  | 0.4562 | 88.07% | 1.000000 | 0.349800 | 0.01458000 | 0.02046000 | NM_002849       | intron     | 0       | Hs.506076 | PTPRR     |
| rs2384351  | 12 | 113008899 | 0.2527 | 97.89% | 0.874900 | 0.826900 | 0.01459000 | 0.03261000 | NM_016196       | upstream   | 120405  | Hs.7482   | RBM19     |
| rs2761272  | 20 | 10697074  | 0.2938 | 96.14% | 0.770700 | 0.692000 | 0.01460000 | 0.11240000 | NM_000214       | upstream   | 94438   | Hs.224012 | JAG1      |
| rs10497357 | 2  | 170578841 | 0.3764 | 92.28% | 0.357600 | 0.874400 | 0.01462000 | 0.05688000 | NM_172070       | intron     | 0       | ---       | UBR3      |
| rs10506658 | 12 | 71254956  | 0.1941 | 83.16% | 0.836500 | 0.105500 | 0.01465000 | 0.01908000 | NM_013381       | intron     | 0       | Hs.199814 | TRHDE     |
| rs7711884  | 5  | 146075685 | 0.1913 | 92.63% | 0.108300 | 0.046630 | 0.01465000 | 0.00916200 | NM_181678       | intron     | 0       | Hs.655213 | PPP2R2B   |
| rs10509463 | 10 | 84689837  | 0.3396 | 84.21% | 0.886600 | 1.000000 | 0.01469000 | 0.02611000 | NM_001010848    | intron     | 0       | Hs.125119 | NRG3      |
| rs990909   | 13 | 38188569  | 0.4760 | 95.09% | 1.000000 | 0.765600 | 0.01469000 | 0.00525300 | NM_207361       | intron     | 0       | Hs.253994 | FREM2     |
| rs1450906  | 4  | 42600857  | 0.2896 | 97.54% | 0.108200 | 0.172700 | 0.01470000 | 0.07439000 | NM_006095       | upstream   | 246990  | Hs.435052 | ATP8A1    |
| rs2001208  | 10 | 84936406  | 0.3500 | 94.74% | 0.348600 | 0.377700 | 0.01471000 | 0.11210000 | ENST00000363904 | upstream   | 118599  | ---       | ---       |
| rs2512185  | 11 | 123634716 | 0.4073 | 96.49% | 1.000000 | 1.000000 | 0.01472000 | 0.03211000 | NM_001005198    | intron     | 0       | Hs.626840 | OR8G5     |
| rs10506918 | 12 | 84752044  | 0.2266 | 97.54% | 0.497400 | 0.845800 | 0.01474000 | 0.07856000 | NM_005447       | upstream   | 28171   | Hs.527881 | PAMC1     |
| rs708087   | 1  | 18551345  | 0.2159 | 92.63% | 0.006359 | 0.155500 | 0.01475000 | 0.15100000 | NM_032880       | intron     | 0       | Hs.212511 | IGSF21    |
| rs9311951  | 3  | 65663422  | 0.2176 | 91.93% | 0.003144 | 0.000338 | 0.01477000 | 0.03805000 | NM_001033057    | intron     | 0       | Hs.651939 | MAGI1     |
| rs1676853  | 18 | 64600350  | 0.0358 | 92.98% | 0.036450 | 0.061030 | 0.01486000 | 0.08727000 | NM_024781       | upstream   | 16000   | Hs.280781 | CCDC102B  |
| rs2115448  | 5  | 85010848  | 0.3102 | 93.33% | 0.199900 | 0.082550 | 0.01486000 | 0.02983000 | ENST00000333189 | downstream | 129324  | ---       | ---       |
| rs4816083  | 20 | 8702768   | 0.0296 | 94.74% | 1.000000 | 1.000000 | 0.01489000 | 0.01946000 | NM_182734       | intron     | 0       | Hs.431173 | PLCB1     |
| rs728997   | 6  | 51750794  | 0.3221 | 93.68% | 0.069360 | 0.025600 | 0.01489000 | 0.01056000 | NM_170724       | intron     | 0       | Hs.662050 | PKHD1     |
| rs389075   | 5  | 54445344  | 0.1565 | 97.54% | 0.168800 | 0.140700 | 0.01490000 | 0.01402000 | NM_152623       | 3UTR       | 0       | Hs.669184 | CDC20B    |
| rs1876092  | 3  | 63565854  | 0.3155 | 95.09% | 0.049460 | 0.100800 | 0.01491000 | 0.05755000 | NM_144642       | intron     | 0       | Hs.648668 | SYNPR     |
| rs9303982  | 18 | 6081294   | 0.0248 | 70.88% | 1.000000 | 1.000000 | 0.01491000 | 0.07194000 | NM_173464       | intron     | 0       | Hs.128279 | L3MBTL4   |
| rs9697     | 1  | 238719570 | 0.1901 | 92.28% | 0.072980 | 0.567800 | 0.01493000 | 0.02569000 | NM_022469       | 3UTR       | 0       | Hs.98206  | CREM2     |
| rs4782644  | 16 | 81046774  | 0.1580 | 81.05% | 0.618500 | 0.469800 | 0.01494000 | 0.04396000 | NM_001257       | upstream   | 402686  | Hs.654386 | CDH13     |
| rs4846826  | 1  | 215484741 | 0.3027 | 89.82% | 0.882600 | 0.303400 | 0.01495000 | 0.02600000 | NM_206595       | upstream   | 155171  | Hs.444225 | ESRRG     |
| rs10503161 | 8  | 1057421   | 0.4283 | 90.53% | 0.373600 | 0.537900 | 0.01496000 | 0.01896000 | NM_004745       | upstream   | 379520  | Hs.113287 | DLGAP2    |
| rs10490615 | 2  | 65792593  | 0.0821 | 96.14% | 0.405800 | 0.113500 | 0.01497000 | 0.06701000 | NM_002398       | upstream   | 723443  | Hs.526754 | MEIS1     |
| rs10501712 | 11 | 89587770  | 0.1296 | 94.74% | 0.589900 | 0.259700 | 0.01497000 | 0.02337000 | NM_012124       | intron     | 0       | Hs.22857  | CHORDC1   |
| rs2833052  | 21 | 31026162  | 0.0417 | 96.84% | 1.000000 | 1.000000 | 0.01500000 | 0.02237000 | NM_181617       | downstream | 14978   | Hs.553699 | KRTAP21-2 |
| rs9283770  | 5  | 22613182  | 0.3257 | 91.58% | 0.089940 | 0.022760 | 0.01500000 | 0.06548000 | NM_004061       | intron     | 0       | Hs.113684 | CDH12     |
| rs644425   | 11 | 109192230 | 0.0295 | 95.09% | 1.000000 | 1.000000 | 0.01501000 | 0.07823000 | NM_207645       | downstream | 390612  | Hs.172982 | LOC399947 |
| rs6501347  | 17 | 65322249  | 0.1820 | 95.44% | 0.415700 | 0.548000 | 0.01501000 | 0.14960000 | NM_002758       | downstream | 271182  | Hs.463978 | MAP2K6    |
| rs777230   | 3  | 127786728 | 0.2510 | 91.58% | 0.000452 | 0.001060 | 0.01501000 | 0.00245600 | NM_001039783    | upstream   | 12652   | Hs.477475 | TR2IT1    |
| rs1071895  | 10 | 120637136 | 0.3128 | 74.04% | 0.000375 | 0.000368 | 0.01503000 | 0.06751000 | NM_001009553    | upstream   | 142082  | ---       | NANOS1    |
| rs1239067  | 2  | 78719000  | 0.4286 | 90.88% | 0.309700 | 0.760000 | 0.01503000 | 0.01790000 | ENST00000325094 | upstream   | 225459  | ---       | ---       |
| rs899036   | 11 | 41639486  | 0.1793 | 96.84% | 0.063050 | 0.010700 | 0.01503000 | 0.00025180 | NM_006595       | upstream   | 1650623 | Hs.435771 | API5      |
| rs1444581  | 12 | 105838381 | 0.2768 | 95.09% | 0.651400 | 0.415200 | 0.01504000 | 0.01014000 | NM_018157       | downstream | 33191   | Hs.131306 | RIC8B     |
| rs7903492  | 10 | 118340939 | 0.0443 | 95.09% | 0.086140 | 0.121800 | 0.01506000 | 0.02506000 | NM_006229       | intron     | 0       | Hs.73923  | PNLIPRP1  |
| rs9307358  | 4  | 112143490 | 0.0443 | 95.09% | 0.412900 | 1.000000 | 0.01506000 | 0.02017000 | NM_000325       | upstream   | 379787  | Hs.643588 | PITX2     |
| rs6097934  | 20 | 52411601  | 0.1468 | 94.39% | 0.139500 | 0.276800 | 0.01508000 | 0.05172000 | NM_018431       | upstream   | 113987  | Hs.656582 | DOK5      |
| rs1515733  | 3  | 162919687 | 0.4273 | 96.49% | 0.174800 | 0.001503 | 0.01509000 | 0.01252000 | ENST00000327928 | downstream | 215263  | ---       | ---       |
| rs333721   | 8  | 57855203  | 0.3104 | 94.39% | 0.569400 | 0.502000 | 0.01511000 | 0.03055000 | NM_006211       | upstream   | 334060  | Hs.339831 | PENK      |
| rs473698   | 2  | 70529089  | 0.3365 | 91.23% | 0.212200 | 1.000000 | 0.01511000 | 0.02130000 | NM_003236       | 3UTR       | 0       | Hs.170009 | TGFA      |
| rs1627431  | 12 | 74249179  | 0.3208 | 92.98% | 0.120300 | 0.706200 | 0.01512000 | 0.02809000 | NM_007043       | upstream   | 57520   | Hs.645517 | KRR1      |
| rs9291499  | 4  | 27145486  | 0.3345 | 97.54% | 0.180700 | 0.281200 | 0.01512000 | 0.03391000 | ENST00000363691 | upstream   | 311339  | ---       | ---       |

|            |    |           |        |        |          |          |            |            |                 |            |         |           |           |
|------------|----|-----------|--------|--------|----------|----------|------------|------------|-----------------|------------|---------|-----------|-----------|
| rs10516483 | 4  | 103010928 | 0.4253 | 91.58% | 0.099240 | 0.519700 | 0.01515000 | 0.01835000 | NM_017935       | intron     | 0       | Hs.480400 | BANK1     |
| rs10516748 | 4  | 86585836  | 0.1498 | 93.68% | 0.335500 | 0.796000 | 0.01515000 | 0.02096000 | NM_001042669    | upstream   | 484614  | Hs.444229 | ARHGAP24  |
| rs2404571  | 3  | 162875663 | 0.1141 | 92.28% | 1.000000 | 1.000000 | 0.01517000 | 0.03048000 | ENST00000327928 | downstream | 171239  | ---       | ---       |
| rs10512312 | 9  | 105018860 | 0.4288 | 96.14% | 0.267500 | 0.449200 | 0.01518000 | 0.01117000 | NM_001340       | downstream | 198269  | Hs.3232   | CYLC2     |
| rs1493931  | 8  | 119825834 | 0.1815 | 87.02% | 0.672100 | 0.476200 | 0.01518000 | 0.01474000 | NM_207506       | upstream   | 122533  | Hs.492653 | SAMD12    |
| rs1481253  | 4  | 67441849  | 0.1099 | 95.79% | 0.007960 | 0.018750 | 0.01519000 | 0.01192000 | ENST00000383902 | downstream | 536056  | ---       | ---       |
| rs10492385 | 12 | 29248257  | 0.3442 | 96.84% | 1.000000 | 1.000000 | 0.01520000 | 0.03686000 | NM_018099       | intron     | 0       | Hs.298851 | MLSTD1    |
| rs10495987 | 2  | 50006784  | 0.4094 | 92.98% | 0.030910 | 0.146800 | 0.01520000 | 0.07475000 | NM_138735       | intron     | 0       | Hs.637685 | NRXN1     |
| rs10502626 | 18 | 30492864  | 0.0525 | 96.84% | 0.539700 | 0.595800 | 0.01520000 | 0.05664000 | NM_032981       | intron     | 0       | Hs.643454 | DTNA      |
| rs1014106  | 7  | 41672091  | 0.1600 | 96.49% | 0.653900 | 0.183000 | 0.01521000 | 0.07191000 | NM_002192       | downstream | 23035   | Hs.583348 | INHBA     |
| rs6753156  | 2  | 202873779 | 0.2435 | 94.39% | 0.508400 | 0.361200 | 0.01521000 | 0.04560000 | NM_015934       | intron     | 0       | Hs.471104 | NOP5/NOP5 |
| rs1458438  | 6  | 78325600  | 0.2830 | 92.98% | 0.649300 | 0.307600 | 0.01522000 | 0.02721000 | NM_000863       | upstream   | 95700   | Hs.123016 | HTR1B     |
| rs2175953  | 13 | 60608503  | 0.2040 | 97.19% | 0.008626 | 0.037760 | 0.01523000 | 0.07754000 | NM_022843       | downstream | 273316  | Hs.391781 | PCDH20    |
| rs2399460  | 3  | 114254195 | 0.2164 | 94.04% | 0.209600 | 0.047570 | 0.01523000 | 0.03588000 | NM_033254       | upstream   | 159870  | Hs.591318 | BOC       |
| rs1356441  | 12 | 82120457  | 0.4539 | 95.09% | 0.327100 | 0.446800 | 0.01524000 | 0.01670000 | NM_152588       | downstream | 68263   | Hs.577775 | TMTC2     |
| rs10494508 | 1  | 176267144 | 0.1310 | 95.09% | 0.591300 | 0.698000 | 0.01525000 | 0.00608400 | ENST00000308284 | intron     | 0       | ---       | ---       |
| rs10509800 | 10 | 107510015 | 0.0296 | 94.74% | 1.000000 | 1.000000 | 0.01525000 | 0.05218000 | NM_001013031    | downstream | 816954  | Hs.591915 | SORCS1    |
| rs232885   | 1  | 58884645  | 0.2032 | 97.54% | 0.195500 | 0.404200 | 0.01526000 | 0.01379000 | ENST00000294610 | downstream | 8354    | ---       | ---       |
| rs3761919  | 1  | 203961343 | 0.2950 | 97.54% | 0.885200 | 0.845900 | 0.01526000 | 0.03473000 | NM_022731       | intron     | 0       | Hs.632458 | NUCKS1    |
| rs10505840 | 12 | 19294996  | 0.0699 | 97.89% | 1.000000 | 1.000000 | 0.01527000 | 0.00990700 | NM_019012       | intron     | 0       | Hs.188614 | PLEKHA5   |
| rs6716767  | 2  | 42412760  | 0.0771 | 88.77% | 1.000000 | 1.000000 | 0.01530000 | 0.02125000 | NM_019063       | 3UTR       | 0       | Hs.593614 | EML4      |
| rs546608   | 4  | 112045354 | 0.1030 | 93.68% | 1.000000 | 1.000000 | 0.01533000 | 0.04498000 | NM_000325       | upstream   | 281651  | Hs.643588 | PTX2      |
| rs10513826 | 3  | 117647582 | 0.1685 | 94.74% | 0.382100 | 0.094040 | 0.01534000 | 0.06936000 | NM_002338       | upstream   | 1014    | Hs.657246 | LITAMP    |
| rs2748219  | 22 | 24561951  | 0.4770 | 83.86% | 0.697700 | 0.421200 | 0.01535000 | 0.09114000 | NM_032608       | intron     | 0       | Hs.417959 | MYO18B    |
| rs1392908  | 4  | 14173600  | 0.1661 | 95.09% | 0.509800 | 0.749400 | 0.01536000 | 0.02946000 | ENST00000357803 | upstream   | 89482   | ---       | ---       |
| rs1989627  | 1  | 171236745 | 0.0349 | 95.44% | 1.000000 | 1.000000 | 0.01537000 | 0.01207000 | NM_005092       | downstream | 38978   | Hs.248197 | TNFSF18   |
| rs423246   | 6  | 94982708  | 0.4206 | 97.19% | 0.460900 | 0.342800 | 0.01537000 | 0.05548000 | ENST00000386414 | downstream | 230854  | ---       | ---       |
| rs10484900 | 6  | 108657232 | 0.1075 | 97.89% | 0.538400 | 0.512600 | 0.01539000 | 0.11580000 | NM_003795       | intron     | 0       | Hs.12102  | SNX3      |
| rs4783035  | 16 | 81046985  | 0.1654 | 94.39% | 0.266700 | 1.000000 | 0.01542000 | 0.05969000 | NM_001257       | upstream   | 402475  | Hs.654386 | CDH13     |
| rs1910650  | 21 | 24343089  | 0.3229 | 95.09% | 0.070270 | 0.026540 | 0.01544000 | 0.10630000 | ENST00000355181 | upstream   | 440052  | ---       | ---       |
| rs1915602  | 10 | 66125009  | 0.1728 | 67.02% | 0.213500 | 0.279400 | 0.01544000 | 0.01352000 | NM_001001330    | downstream | 1070122 | Hs.499833 | REEP3     |
| rs2691390  | 4  | 57905571  | 0.3423 | 97.89% | 0.145500 | 0.022450 | 0.01544000 | 0.04489000 | NM_001553       | upstream   | 234263  | Hs.479808 | IGFBP7    |
| rs10512374 | 9  | 109775385 | 0.1147 | 93.33% | 0.130200 | 0.138100 | 0.01545000 | 0.08785000 | ENST00000297812 | upstream   | 138454  | ---       | ---       |
| rs2631267  | 4  | 103167495 | 0.1358 | 92.98% | 0.014530 | 0.000126 | 0.01545000 | 0.11900000 | NM_017935       | intron     | 0       | Hs.480400 | BANK1     |
| rs6940582  | 6  | 124724287 | 0.1105 | 96.84% | 0.349800 | 0.326100 | 0.01546000 | 0.04142000 | NM_001040214    | intron     | 0       | Hs.656604 | NKAIN2    |
| rs10497035 | 2  | 149022511 | 0.4259 | 92.28% | 0.077010 | 0.037240 | 0.01547000 | 0.00456200 | NM_018328       | downstream | 34999   | Hs.458312 | MBD5      |
| rs3808747  | 9  | 17616616  | 0.1320 | 94.39% | 1.000000 | 0.697500 | 0.01547000 | 0.00347600 | NM_003026       | intron     | 0       | Hs.75149  | SH3GL2    |
| rs261212   | 5  | 95967121  | 0.3947 | 93.33% | 0.898100 | 0.756800 | 0.01548000 | 0.00928500 | NM_001042443    | upstream   | 97140   | Hs.440961 | CAST      |
| rs9293020  | 5  | 22556305  | 0.3321 | 92.98% | 1.000000 | 0.855500 | 0.01548000 | 0.02851000 | NM_004061       | intron     | 0       | Hs.113684 | CDH12     |
| rs1392409  | 5  | 85119970  | 0.2912 | 91.58% | 0.652400 | 0.600300 | 0.01549000 | 0.11780000 | ENST00000333189 | downstream | 238446  | ---       | ---       |
| rs9301795  | 13 | 91765949  | 0.0430 | 97.89% | 1.000000 | 1.000000 | 0.01550000 | 0.01080000 | NM_004466       | intron     | 0       | Hs.655675 | GPC5      |
| rs2312933  | 6  | 76634385  | 0.0500 | 84.21% | 0.106500 | 0.139800 | 0.01551000 | 0.06571000 | NM_004999       | intron     | 0       | Hs.149387 | MYO6      |
| rs12455845 | 18 | 1427602   | 0.0400 | 87.72% | 1.000000 | 1.000000 | 0.01553000 | 0.02735000 | NM_022840       | downstream | 1099928 | Hs.126888 | METTL4    |
| rs10487393 | 7  | 117664649 | 0.0646 | 95.09% | 0.302400 | 1.000000 | 0.01554000 | 0.08257000 | NM_019644       | intron     | 0       | Hs.657737 | ANKRD7    |
| rs2374334  | 7  | 90123410  | 0.2292 | 97.19% | 0.865500 | 1.000000 | 0.01554000 | 0.02283000 | ENST00000306129 | intron     | 0       | ---       | ---       |
| rs3757797  | 7  | 117659274 | 0.0646 | 95.09% | 0.302400 | 1.000000 | 0.01554000 | 0.08257000 | NM_019644       | intron     | 0       | Hs.657737 | ANKRD7    |
| rs3913016  | 12 | 57002855  | 0.1476 | 95.09% | 0.627200 | 1.000000 | 0.01556000 | 0.02504000 | ENST00000354328 | downstream | 5576    | ---       | ---       |
| rs10499999 | 7  | 110196597 | 0.2966 | 92.28% | 1.000000 | 0.734500 | 0.01557000 | 0.01758000 | NM_032549       | intron     | 0       | Hs.655722 | IMMP2L    |
| rs9312227  | 4  | 169008236 | 0.0368 | 95.44% | 0.042590 | 0.064750 | 0.01557000 | 0.05735000 | NM_007193       | upstream   | 242074  | Hs.188401 | ANXA10    |
| rs2373478  | 11 | 79727297  | 0.3011 | 96.14% | 0.316200 | 0.557700 | 0.01559000 | 0.00947300 | ENST00000363276 | upstream   | 189355  | ---       | ---       |
| rs733046   | 4  | 32076883  | 0.4524 | 95.79% | 0.902900 | 0.763500 | 0.01559000 | 0.00160100 | NM_032425       | downstream | 1323314 | Hs.570785 | PCDH7     |
| rs2032092  | 21 | 38704841  | 0.2306 | 90.53% | 0.290800 | 0.046410 | 0.01561000 | 0.01419000 | NM_004449       | intron     | 0       | Hs.473819 | ERG       |
| rs2465764  | 11 | 106419130 | 0.1933 | 94.39% | 1.000000 | 0.782800 | 0.01561000 | 0.00205100 | NM_000855       | upstream   | 24749   | Hs.654555 | GUCY1A2   |
| rs3749214  | 3  | 158465967 | 0.3926 | 94.74% | 0.798400 | 0.878700 | 0.01561000 | 0.02133000 | NM_024621       | intron     | 0       | Hs.658046 | VEPH1     |

|            |    |           |        |        |          |          |            |            |                 |            |         |           |          |
|------------|----|-----------|--------|--------|----------|----------|------------|------------|-----------------|------------|---------|-----------|----------|
| rs1389563  | 9  | 586826    | 0.2809 | 93.68% | 0.094380 | 0.078840 | 0.01562000 | 0.00649000 | NM_015158       | intron     | 0       | Hs.306764 | ANKRD15  |
| rs728695   | 9  | 84651341  | 0.3448 | 91.58% | 0.681000 | 0.418100 | 0.01564000 | 0.01815000 | NM_152573       | downstream | 132979  | Hs.657750 | RASEF    |
| rs9302112  | 15 | 40607743  | 0.4281 | 97.54% | 0.902600 | 0.549500 | 0.01565000 | 0.06676000 | NM_130798       | intron     | 0       | Hs.511149 | SNAP23   |
| rs231948   | 6  | 155783805 | 0.4332 | 97.19% | 0.807300 | 0.547100 | 0.01568000 | 0.00796200 | NM_015718       | intron     | 0       | Hs.247776 | NOX3     |
| rs10509278 | 10 | 68476319  | 0.0535 | 95.09% | 0.546600 | 0.595800 | 0.01570000 | 0.09583000 | NM_013266       | intron     | 0       | Hs.660362 | CTNNA3   |
| rs10516731 | 4  | 86217807  | 0.0535 | 95.09% | 0.546600 | 0.595800 | 0.01570000 | 0.06595000 | ENST00000365031 | upstream   | 22866   | ---       | ---      |
| rs1718794  | 4  | 171447101 | 0.4725 | 89.47% | 0.452000 | 0.440300 | 0.01570000 | 0.09407000 | NM_182662       | upstream   | 199154  | Hs.529735 | AADAT    |
| rs9309658  | 2  | 28110335  | 0.3560 | 90.18% | 0.021410 | 0.077480 | 0.01570000 | 0.09788000 | NM_199192       | intron     | 0       | Hs.258314 | BRE      |
| rs154152   | 5  | 14433324  | 0.1601 | 71.23% | 0.793000 | 1.000000 | 0.01572000 | 0.00901500 | NM_007118       | intron     | 0       | Hs.130031 | TRIO     |
| rs10923960 | 1  | 116378633 | 0.0648 | 94.74% | 0.304000 | 0.298600 | 0.01573000 | 0.03456000 | NM_018420       | intron     | 0       | Hs.125482 | SLC22A15 |
| rs2945075  | 11 | 28833042  | 0.4218 | 91.93% | 0.799900 | 0.417900 | 0.01574000 | 0.07091000 | NM_152636       | downstream | 521523  | Hs.243326 | METT5D1  |
| rs10495175 | 1  | 219889769 | 0.3616 | 95.09% | 0.237200 | 0.731300 | 0.01575000 | 0.06062000 | NM_144729       | downstream | 51620   | Hs.497822 | DUSP10   |
| rs10490863 | 3  | 133613652 | 0.1803 | 81.75% | 0.825200 | 0.811300 | 0.01576000 | 0.09185000 | NM_015268       | upstream   | 22433   | Hs.12707  | DNAJC13  |
| rs10491803 | 9  | 94652670  | 0.0072 | 97.54% | 1.000000 | 1.000000 | 0.01577000 | 0.99870000 | NM_001010925    | intron     | 0       | ---       | ANKRD19  |
| rs7909489  | 10 | 20627497  | 0.3258 | 93.68% | 0.404400 | 1.000000 | 0.01577000 | 0.01507000 | NM_032812       | downstream | 18205   | Hs.658134 | PLXDC2   |
| rs1732351  | 12 | 40756788  | 0.3520 | 97.19% | 1.000000 | 1.000000 | 0.01578000 | 0.03004000 | ENST00000280876 | downstream | 10525   | ---       | ---      |
| rs961090   | 15 | 38404706  | 0.4708 | 96.14% | 0.089260 | 0.361700 | 0.01578000 | 0.13940000 | NM_207380       | downstream | 6301    | Hs.32433  | C15orf52 |
| rs10494964 | 1  | 212033510 | 0.4981 | 90.88% | 0.709200 | 0.759700 | 0.01579000 | 0.07096000 | ENST00000362373 | downstream | 148166  | ---       | ---      |
| rs6509546  | 19 | 56710286  | 0.1850 | 89.12% | 0.837100 | 0.822700 | 0.01581000 | 0.00618400 | NM_198846       | downstream | 4510    | Hs.397255 | SIGLEC6  |
| rs6581827  | 12 | 67170158  | 0.3675 | 82.11% | 0.259900 | 0.738400 | 0.01581000 | 0.00499300 | NM_017440       | upstream   | 157779  | Hs.655702 | MDM1     |
| rs953323   | 6  | 4381298   | 0.4653 | 96.14% | 0.274600 | 1.000000 | 0.01583000 | 0.04791000 | NM_001011540    | upstream   | 174547  | ---       | KU-MEL-3 |
| rs2863171  | 11 | 45207308  | 0.1395 | 81.75% | 0.585500 | 0.696300 | 0.01584000 | 0.07116000 | NM_020229       | downstream | 4094    | Hs.178715 | PRDM11   |
| rs4085170  | 11 | 102307932 | 0.1726 | 78.25% | 0.017170 | 0.021220 | 0.01589000 | 0.06951000 | NM_002427       | downstream | 11005   | Hs.2936   | MMP13    |
| rs7140637  | 14 | 49892268  | 0.3959 | 94.39% | 0.310800 | 0.188600 | 0.01589000 | 0.10860000 | NM_004196       | intron     | 0       | Hs.705385 | CDKL1    |
| rs2077713  | 20 | 166783    | 0.1165 | 93.33% | 0.765800 | 0.752000 | 0.01594000 | 0.00669700 | NM_080831       | downstream | 8256    | Hs.112087 | DEFB129  |
| rs10517742 | 4  | 162421722 | 0.2884 | 93.68% | 1.000000 | 0.862600 | 0.01596000 | 0.03657000 | NM_020116       | downstream | 102779  | Hs.591707 | FTSL5    |
| rs660274   | 11 | 84482949  | 0.3444 | 84.56% | 0.478500 | 0.706400 | 0.01596000 | 0.06689000 | ENST00000376104 | intron     | 0       | ---       | ---      |
| rs1025226  | 15 | 40001517  | 0.1148 | 94.74% | 0.763400 | 1.000000 | 0.01598000 | 0.02001000 | NM_139265       | intron     | 0       | Hs.143703 | EHD4     |
| rs1384370  | 18 | 64079465  | 0.0833 | 96.84% | 0.415400 | 0.499000 | 0.01598000 | 0.01248000 | NM_019022       | downstream | 412442  | Hs.440534 | TXNDC10  |
| rs2859443  | 22 | 42062368  | 0.2928 | 92.28% | 0.458600 | 0.544700 | 0.01598000 | 0.02052000 | NM_173050       | intron     | 0       | Hs.133995 | SCUBE1   |
| rs9285582  | 14 | 54156618  | 0.4442 | 84.91% | 0.363900 | 0.342800 | 0.01599000 | 0.03623000 | NM_015589       | intron     | 0       | Hs.98259  | SAMD4A   |
| rs1157819  | 1  | 207671357 | 0.3634 | 83.51% | 0.000153 | 0.017170 | 0.01600000 | 0.00865700 | ENST00000367032 | 5UTR       | 0       | ---       | ---      |
| rs10485681 | 20 | 39926486  | 0.0759 | 94.74% | 1.000000 | 1.000000 | 0.01601000 | 0.07055000 | NM_007050       | downstream | 208320  | Hs.526879 | PTPRT    |
| rs10502605 | 18 | 28542164  | 0.2975 | 97.89% | 0.566200 | 0.130900 | 0.01601000 | 0.17600000 | NM_020805       | intron     | 0       | Hs.446164 | KLHL14   |
| rs10520944 | 5  | 28874857  | 0.1625 | 97.19% | 0.505200 | 0.467300 | 0.01602000 | 0.03563000 | ENST00000333399 | upstream   | 86607   | ---       | ---      |
| rs10509043 | 10 | 57304421  | 0.0824 | 97.89% | 0.705400 | 0.698300 | 0.01603000 | 0.06229000 | NM_001005414    | downstream | 482784  | ---       | ZWINT    |
| rs360380   | 2  | 126836951 | 0.0824 | 97.89% | 1.000000 | 1.000000 | 0.01603000 | 0.08453000 | NM_016815       | upstream   | 327593  | Hs.59138  | GYPC     |
| rs4593265  | 5  | 125188437 | 0.4800 | 96.49% | 0.717300 | 1.000000 | 0.01604000 | 0.01028000 | NM_023927       | upstream   | 598563  | Hs.363558 | GRAMD3   |
| rs10503648 | 8  | 19062324  | 0.0839 | 96.14% | 1.000000 | 1.000000 | 0.01605000 | 0.01294000 | NM_022071       | upstream   | 153084  | Hs.303208 | SH2D4A   |
| rs10507313 | 13 | 22170145  | 0.0377 | 92.98% | 0.310800 | 1.000000 | 0.01605000 | 0.03527000 | ENST00000362980 | upstream   | 105139  | ---       | ---      |
| rs2880538  | 1  | 240840987 | 0.0562 | 93.68% | 0.578000 | 1.000000 | 0.01605000 | 0.07800000 | NM_152666       | upstream   | 86366   | Hs.672452 | PLD5     |
| rs6724513  | 2  | 20755964  | 0.1478 | 86.67% | 0.038210 | 0.011750 | 0.01608000 | 0.10910000 | NM_021925       | intron     | 0       | Hs.187823 | C2orf43  |
| rs10495585 | 2  | 11909579  | 0.0326 | 91.58% | 0.001225 | 0.002736 | 0.01610000 | 0.18560000 | NM_145693       | downstream | 24597   | Hs.467740 | LPIN1    |
| rs2526632  | 7  | 18999334  | 0.4903 | 90.88% | 0.047100 | 0.285700 | 0.01610000 | 0.02576000 | NM_178425       | intron     | 0       | Hs.196054 | HDAC9    |
| rs10508146 | 13 | 103854808 | 0.0756 | 95.09% | 0.184300 | 0.198700 | 0.01611000 | 0.11270000 | NM_172370       | upstream   | 1061785 | Hs.381382 | DAOA     |
| rs9319012  | 13 | 83522733  | 0.3209 | 94.04% | 1.000000 | 0.576500 | 0.01611000 | 0.03381000 | NM_052910       | upstream   | 168204  | Hs.415478 | SLITRK1  |
| rs10495130 | 1  | 217872013 | 0.0318 | 93.68% | 0.231100 | 0.300000 | 0.01613000 | 0.03843000 | NM_138794       | downstream | 419183  | Hs.657617 | LYPLAL1  |
| rs489565   | 1  | 225376830 | 0.3180 | 87.72% | 0.561700 | 0.493300 | 0.01614000 | 0.04356000 | NM_003607       | intron     | 0       | Hs.35433  | CDC42BPA |
| rs1386286  | 3  | 151326543 | 0.2066 | 90.88% | 1.000000 | 1.000000 | 0.01615000 | 0.00953800 | ENST00000386021 | upstream   | 48235   | ---       | ---      |
| rs1496939  | 4  | 190243275 | 0.4049 | 94.04% | 0.128700 | 0.646000 | 0.01618000 | 0.11100000 | ENST00000378771 | downstream | 148725  | ---       | ---      |
| rs1073731  | 9  | 140010194 | 0.0072 | 97.89% | 1.000000 | 1.000000 | 0.01619000 | 0.99850000 | NM_000718       | intron     | 0       | Hs.495522 | CACNA1B  |
| rs1479237  | 2  | 4619354   | 0.1513 | 95.09% | 0.351200 | 0.313400 | 0.01619000 | 0.01419000 | ENST00000387792 | downstream | 233112  | ---       | ---      |
| rs1869941  | 4  | 190586616 | 0.4768 | 90.88% | 0.803600 | 0.532700 | 0.01619000 | 0.02012000 | ENST00000378770 | upstream   | 44679   | ---       | ---      |
| rs2327477  | 6  | 134834477 | 0.0953 | 97.54% | 0.290400 | 0.227400 | 0.01619000 | 0.00998100 | NM_005627       | upstream   | 296797  | Hs.510078 | SGK1     |

|            |    |           |        |        |          |          |            |            |                 |            |        |           |           |
|------------|----|-----------|--------|--------|----------|----------|------------|------------|-----------------|------------|--------|-----------|-----------|
| rs9293311  | 5  | 82063886  | 0.3333 | 94.74% | 0.412800 | 1.000000 | 0.01619000 | 0.07002000 | NM_174909       | downstream | 320537 | Hs.355606 | TMEM167   |
| rs953497   | 6  | 130500818 | 0.0072 | 97.89% | 0.010760 | 1.000000 | 0.01619000 | 0.99850000 | NM_001007102    | intron     | 0      | Hs.658051 | L3MBTL3   |
| rs10519764 | 15 | 30986441  | 0.2050 | 97.54% | 1.000000 | 1.000000 | 0.01620000 | 0.01245000 | ENST00000334528 | intron     | 0      | ---       | ---       |
| rs348566   | 5  | 40343736  | 0.2135 | 96.14% | 0.369200 | 1.000000 | 0.01620000 | 0.02396000 | ENST00000362491 | downstream | 38158  | ---       | ---       |
| rs6501346  | 17 | 65321736  | 0.1836 | 96.49% | 0.840000 | 1.000000 | 0.01620000 | 0.15270000 | NM_002758       | downstream | 270669 | Hs.463978 | MAP2K6    |
| rs10492184 | 12 | 5569309   | 0.0964 | 96.49% | 0.294400 | 1.000000 | 0.01621000 | 0.04945000 | NM_020373       | intron     | 0      | Hs.148970 | TMEM16B   |
| rs1501045  | 18 | 4941575   | 0.2860 | 95.09% | 1.000000 | 0.388600 | 0.01621000 | 0.01087000 | ENST00000320108 | downstream | 285788 | ---       | ---       |
| rs10517410 | 4  | 37045599  | 0.0842 | 97.89% | 0.704400 | 0.697500 | 0.01622000 | 0.00571900 | ENST00000389006 | intron     | 0      | ---       | ---       |
| rs959170   | 1  | 21236770  | 0.0877 | 94.04% | 1.000000 | 1.000000 | 0.01623000 | 0.04642000 | NM_003760       | intron     | 0      | Hs.467084 | EIF4G3    |
| rs1412938  | 13 | 93661657  | 0.4120 | 93.68% | 0.016240 | 0.015910 | 0.01624000 | 0.01862000 | NM_005708       | intron     | 0      | Hs.444329 | GPC6      |
| rs894246   | 4  | 77298526  | 0.1841 | 97.19% | 0.315800 | 0.379600 | 0.01624000 | 0.00603400 | NM_005506       | downstream | 392    | Hs.349656 | SCARB2    |
| rs2826766  | 21 | 21582505  | 0.1371 | 90.88% | 1.088000 | 0.256200 | 0.01626000 | 0.01444000 | NM_004540       | intron     | 0      | Hs.473450 | NCAM2     |
| rs634283   | 11 | 81529120  | 0.3143 | 95.44% | 1.000000 | 0.868000 | 0.01626000 | 0.01724000 | ENST00000357859 | upstream   | 549129 | ---       | ---       |
| rs6600813  | 4  | 71252643  | 0.1328 | 95.09% | 0.796000 | 0.424600 | 0.01626000 | 0.12060000 | NM_012390       | upstream   | 8439   | Hs.701334 | SMR3A     |
| rs10491106 | 17 | 16395636  | 0.0317 | 94.04% | 0.022680 | 1.000000 | 0.01629000 | 0.07125000 | NM_020653       | 3UTR       | 0      | Hs.99724  | ZNF287    |
| rs10505996 | 12 | 26393672  | 0.0314 | 95.09% | 1.000000 | 1.000000 | 0.01630000 | 0.05181000 | NM_002223       | intron     | 0      | Hs.512235 | ITPR2     |
| rs10507127 | 12 | 99914189  | 0.0975 | 97.19% | 0.731700 | 0.602900 | 0.01631000 | 0.02342000 | NM_178826       | intron     | 0      | Hs.58785  | TMEM16D   |
| rs1322100  | 6  | 77796828  | 0.2509 | 95.09% | 0.014500 | 0.016160 | 0.01632000 | 0.02636000 | NM_000863       | downstream | 431839 | Hs.123016 | HTR1B     |
| rs1445420  | 3  | 145323434 | 0.1729 | 94.39% | 0.670300 | 0.644200 | 0.01632000 | 0.04652000 | NM_173552       | downstream | 129541 | Hs.288954 | C3orf58   |
| rs10485313 | 6  | 65977375  | 0.2230 | 94.39% | 0.292100 | 0.628800 | 0.01634000 | 0.01039000 | ENST00000370615 | downstream | 85103  | ---       | ---       |
| rs336030   | 2  | 38120500  | 0.4649 | 84.91% | 0.013920 | 0.193200 | 0.01634000 | 0.05894000 | NM_144713       | intron     | 0      | Hs.591566 | FAM82A    |
| rs10502665 | 18 | 32530580  | 0.1100 | 87.72% | 0.514100 | 0.299900 | 0.01636000 | 0.02309000 | NM_025135       | intron     | 0      | Hs.436636 | FHOD3     |
| rs2187753  | 22 | 48070584  | 0.3587 | 96.84% | 0.600700 | 1.000000 | 0.01638000 | 0.00853000 | NM_207478       | upstream   | 257749 | ---       | FLJ44385  |
| rs723105   | 3  | 119284498 | 0.2672 | 81.40% | 0.067210 | 0.436600 | 0.01638000 | 0.15970000 | NM_001015887    | downstream | 819193 | Hs.112873 | IGSF11    |
| rs10501062 | 11 | 26642651  | 0.1787 | 92.28% | 0.402800 | 1.000000 | 0.01639000 | 0.03166000 | NM_031418       | downstream | 1240   | Hs.91791  | TMEM16C   |
| rs6067805  | 20 | 49568498  | 0.1208 | 92.98% | 0.078770 | 0.652300 | 0.01640000 | 0.02188000 | NM_173091       | intron     | 0      | Hs.699441 | NFATC2    |
| rs7560892  | 2  | 23782141  | 0.3451 | 79.30% | 0.039530 | 0.005985 | 0.01640000 | 0.01264000 | ENST00000288548 | intron     | 0      | ---       | ---       |
| rs7895806  | 10 | 29278534  | 0.0894 | 92.28% | 0.136100 | 0.131700 | 0.01640000 | 0.03359000 | NM_032517       | upstream   | 339462 | Hs.558572 | LYZL1     |
| rs10519620 | 2  | 4242738   | 0.0370 | 94.74% | 1.000000 | 1.000000 | 0.01641000 | 0.04771000 | ENST00000382050 | downstream | 513237 | ---       | ---       |
| rs10506611 | 12 | 69537397  | 0.4636 | 96.49% | 0.544100 | 0.132200 | 0.01642000 | 0.02553000 | NM_002849       | intron     | 0      | Hs.506076 | PTPRR     |
| rs2057664  | 7  | 25378628  | 0.3087 | 97.19% | 0.778800 | 1.000000 | 0.01643000 | 0.06549000 | ENST00000365363 | downstream | 107603 | ---       | ---       |
| rs10515345 | 5  | 102814058 | 0.1867 | 87.37% | 0.303400 | 0.215500 | 0.01644000 | 0.07363000 | NM_031438       | downstream | 98397  | Hs.434289 | NUDT12    |
| rs6844026  | 4  | 70418580  | 0.2698 | 97.54% | 0.445800 | 0.381900 | 0.01644000 | 0.17220000 | NM_021139       | upstream   | 22368  | Hs.285887 | UGT2B4    |
| rs1882256  | 3  | 172933521 | 0.3579 | 97.54% | 1.000000 | 0.494600 | 0.01645000 | 0.09730000 | NM_002662       | intron     | 0      | Hs.382865 | PLD1      |
| rs4852483  | 2  | 79454929  | 0.1194 | 94.04% | 0.556100 | 0.649800 | 0.01647000 | 0.11610000 | NM_138937       | upstream   | 214542 | Hs.567312 | REG3A     |
| rs10515062 | 5  | 67343968  | 0.3745 | 88.07% | 0.180000 | 0.375800 | 0.01648000 | 0.08447000 | NM_181524       | upstream   | 276040 | Hs.132225 | PIK3R1    |
| rs955638   | 4  | 183491655 | 0.2079 | 97.89% | 0.855800 | 1.000000 | 0.01648000 | 0.02239000 | ENST00000389043 | intron     | 0      | ---       | ---       |
| rs562125   | 9  | 109774984 | 0.3829 | 88.42% | 0.350800 | 0.862000 | 0.01649000 | 0.00681600 | ENST00000297812 | upstream   | 138053 | ---       | ---       |
| rs10503430 | 8  | 12902127  | 0.1286 | 96.84% | 1.000000 | 1.000000 | 0.01651000 | 0.02932000 | NM_001039462    | intron     | 0      | ---       | C8orf79   |
| rs10505338 | 8  | 119824671 | 0.1734 | 95.09% | 0.401100 | 0.242100 | 0.01654000 | 0.00980400 | NM_207506       | upstream   | 121370 | Hs.492653 | SAMD12    |
| rs1956455  | 14 | 93711620  | 0.1415 | 90.53% | 0.000052 | 0.001412 | 0.01654000 | 0.04000000 | NM_020958       | intron     | 0      | Hs.259599 | KIAA1622  |
| rs2193135  | 14 | 79517999  | 0.1846 | 97.89% | 0.426000 | 0.261500 | 0.01654000 | 0.02958000 | NM_138970       | downstream | 117488 | Hs.368307 | NRXN3     |
| rs7634356  | 3  | 181630586 | 0.4583 | 84.21% | 0.027170 | 0.024080 | 0.01654000 | 0.08327000 | ENST00000364940 | upstream   | 112597 | ---       | ---       |
| rs2063428  | 6  | 165167856 | 0.4856 | 97.19% | 0.718300 | 1.000000 | 0.01657000 | 0.01666000 | NM_144980       | downstream | 445300 | Hs.144734 | C6orf118  |
| rs1112762  | 10 | 8347412   | 0.4982 | 96.49% | 1.000000 | 0.451100 | 0.01658000 | 0.05593000 | NM_002051       | downstream | 190242 | Hs.524134 | GATA3     |
| rs1578792  | 10 | 37183267  | 0.1333 | 94.74% | 0.594900 | 1.000000 | 0.01658000 | 0.16970000 | NM_052997       | upstream   | 271524 | Hs.373787 | ANKRD30A  |
| rs7097123  | 10 | 107583441 | 0.0461 | 95.09% | 1.000000 | 1.000000 | 0.01658000 | 0.01412000 | NM_001013031    | downstream | 743528 | Hs.591915 | SORCS1    |
| rs710765   | 12 | 68277894  | 0.1970 | 94.39% | 0.334900 | 0.670400 | 0.01658000 | 0.02874000 | NM_006431       | intron     | 0      | Hs.189772 | CCT2      |
| rs1993059  | 4  | 42551651  | 0.4585 | 92.98% | 0.902000 | 0.756700 | 0.01659000 | 0.02105000 | NM_006095       | upstream   | 197992 | Hs.435052 | ATP8A1    |
| rs2174623  | 4  | 125925394 | 0.3389 | 94.74% | 0.134500 | 0.592200 | 0.01663000 | 0.06871000 | NM_020337       | upstream   | 74012  | Hs.480694 | ANKRD50   |
| rs9283491  | 2  | 184877562 | 0.2509 | 94.39% | 0.516900 | 0.711900 | 0.01665000 | 0.03445000 | NM_194250       | upstream   | 294370 | Hs.159528 | ZNF804A   |
| rs782945   | 15 | 59125923  | 0.4712 | 97.54% | 0.809700 | 1.000000 | 0.01667000 | 0.12190000 | NM_134261       | intron     | 0      | Hs.695914 | RORA      |
| rs952840   | 5  | 86135661  | 0.4427 | 97.89% | 0.904000 | 0.881100 | 0.01667000 | 0.00814100 | NM_001039781    | downstream | 245858 | ---       | LOC645261 |
| rs10485818 | 20 | 168303    | 0.1059 | 82.81% | 1.000000 | 1.000000 | 0.01668000 | 0.00416800 | NM_080831       | downstream | 9776   | Hs.112087 | DEFB129   |

|            |    |           |        |        |          |          |            |            |                 |            |        |           |          |
|------------|----|-----------|--------|--------|----------|----------|------------|------------|-----------------|------------|--------|-----------|----------|
| rs10484097 | 14 | 85835026  | 0.4389 | 91.93% | 0.381300 | 0.749500 | 0.01670000 | 0.13100000 | NM_013231       | downstream | 671004 | Hs.533710 | FLRT2    |
| rs167527   | 5  | 3189229   | 0.1030 | 93.68% | 0.499200 | 0.483700 | 0.01670000 | 0.12360000 | NM_178569       | downstream | 380718 | Hs.668017 | C5orf38  |
| rs10510019 | 10 | 118183010 | 0.3651 | 97.54% | 1.000000 | 0.756800 | 0.01671000 | 0.03348000 | NM_001011709    | intron     | 0      | Hs.276724 | PNLIPRP3 |
| rs3755806  | 3  | 52618725  | 0.5000 | 96.84% | 0.337000 | 0.649000 | 0.01671000 | 0.09870000 | NM_181042       | CDS        | 0      | Hs.189920 | PBRM1    |
| rs1400549  | 11 | 103245119 | 0.4606 | 97.89% | 0.040170 | 0.125400 | 0.01672000 | 0.00823600 | NM_033135       | downstream | 38012  | Hs.352298 | PDGFD    |
| rs1892917  | 9  | 18100746  | 0.4089 | 94.39% | 0.528300 | 0.285200 | 0.01672000 | 0.11040000 | NM_003026       | downstream | 313619 | Hs.75149  | SH3GL2   |
| rs10507243 | 12 | 113193181 | 0.4419 | 93.68% | 0.459400 | 0.226400 | 0.01673000 | 0.01308000 | NM_181486       | downstream | 82938  | Hs.381715 | TBX5     |
| rs4074785  | 9  | 21971583  | 0.2690 | 97.19% | 0.091520 | 0.536800 | 0.01673000 | 0.01103000 | NM_058195       | intron     | 0      | Hs.512599 | CDKN2A   |
| rs10498990 | 6  | 95943353  | 0.2440 | 88.42% | 0.608600 | 0.475100 | 0.01674000 | 0.01986000 | NM_024641       | upstream   | 188781 | Hs.533323 | MANEA    |
| rs10494648 | 1  | 189080190 | 0.2441 | 89.82% | 0.234400 | 0.702600 | 0.01679000 | 0.02132000 | NM_199051       | upstream   | 366808 | Hs.65765  | FAM5C    |
| rs10498556 | 14 | 82446133  | 0.1963 | 94.74% | 1.000000 | 0.032720 | 0.01679000 | 0.01098000 | ENST00000362427 | upstream   | 138542 | ---       | ---      |
| rs6879726  | 5  | 81990043  | 0.3127 | 90.88% | 0.000293 | 0.000162 | 0.01679000 | 0.17910000 | NM_001039779    | downstream | 271952 | ---       | FLJ41309 |
| rs801760   | 7  | 18559723  | 0.0180 | 97.54% | 0.079050 | 0.121100 | 0.01679000 | 0.99780000 | NM_178425       | intron     | 0      | Hs.196054 | HDAC9    |
| rs2953617  | 7  | 133324640 | 0.3000 | 92.98% | 0.558500 | 0.865000 | 0.01682000 | 0.08069000 | NM_001037126    | intron     | 0      | Hs.321273 | EXOC4    |
| rs885685   | 7  | 48898843  | 0.4130 | 94.74% | 0.133600 | 0.546100 | 0.01683000 | 0.05486000 | ENST00000324993 | upstream   | 35860  | ---       | ---      |
| rs1152344  | 14 | 82253091  | 0.3810 | 66.32% | 0.644500 | 0.720500 | 0.01684000 | 0.06620000 | ENST00000387641 | downstream | 254807 | ---       | ---      |
| rs1915761  | 2  | 79079645  | 0.0375 | 93.68% | 0.308800 | 0.368900 | 0.01685000 | 0.01085000 | NM_198448       | upstream   | 26689  | Hs.447084 | REG3G    |
| rs533480   | 10 | 97222195  | 0.2007 | 94.39% | 0.703200 | 1.000000 | 0.01687000 | 0.00521900 | NM_001034957    | intron     | 0      | Hs.696027 | SORBS1   |
| rs7790890  | 7  | 108037207 | 0.4310 | 94.04% | 0.709600 | 0.652500 | 0.01687000 | 0.01838000 | NM_012328       | downstream | 34677  | Hs.6790   | DNAJB9   |
| rs10493753 | 1  | 84764257  | 0.0195 | 90.18% | 0.002356 | 0.005609 | 0.01689000 | 0.99740000 | NM_022354       | CDS        | 0      | ---       | SPATA1   |
| rs10503705 | 8  | 21325431  | 0.0072 | 96.84% | 1.000000 | 1.000000 | 0.01690000 | 0.99850000 | ENST00000387614 | upstream   | 174821 | ---       | ---      |
| rs7834726  | 8  | 106866555 | 0.0370 | 94.74% | 0.003297 | 0.005568 | 0.01690000 | 0.08650000 | NM_012082       | intron     | 0      | Hs.431009 | ZFPF2    |
| rs6491544  | 13 | 99549209  | 0.4856 | 97.54% | 0.402900 | 0.290900 | 0.01691000 | 0.02188000 | NM_000282       | intron     | 0      | Hs.80741  | PCCA     |
| rs2292225  | 2  | 25508950  | 0.5000 | 97.54% | 0.230100 | 0.293000 | 0.01693000 | 0.03518000 | NM_183361       | intron     | 0      | Hs.307720 | DTNB     |
| rs2834448  | 21 | 34622354  | 0.0387 | 95.09% | 1.000000 | 1.000000 | 0.01693000 | 0.05103000 | NM_172201       | upstream   | 35839  | Hs.551521 | KCNE2    |
| rs2272504  | 12 | 71255465  | 0.2174 | 80.70% | 0.334400 | 0.017590 | 0.01696000 | 0.04893000 | NM_013381       | intron     | 0      | Hs.199814 | TRHDE    |
| rs333047   | 8  | 19094091  | 0.4838 | 97.54% | 0.151500 | 0.655100 | 0.01697000 | 0.03265000 | NM_022071       | upstream   | 121317 | Hs.303208 | SH2D4A   |
| rs10515811 | 5  | 159913158 | 0.1347 | 95.09% | 0.599400 | 0.781000 | 0.01698000 | 0.02473000 | ENST00000385201 | downstream | 68123  | ---       | ---      |
| rs3732136  | 2  | 58240504  | 0.2112 | 97.19% | 0.473200 | 0.456300 | 0.01699000 | 0.01259000 | NM_006296       | 3UTR       | 0      | Hs.631890 | VRK2     |
| rs224939   | 5  | 81752858  | 0.3333 | 94.74% | 0.101400 | 0.856800 | 0.01700000 | 0.20210000 | NM_001039779    | downstream | 34767  | ---       | FLJ41309 |
| rs6437541  | 3  | 105996424 | 0.1655 | 96.49% | 0.827200 | 0.628200 | 0.01700000 | 0.09061000 | ENST00000388649 | downstream | 16028  | ---       | ---      |
| rs2032203  | 21 | 20598845  | 0.4342 | 93.33% | 0.382000 | 0.267900 | 0.01701000 | 0.01956000 | ENST00000387009 | downstream | 51086  | ---       | ---      |
| rs4344605  | 13 | 54680266  | 0.3718 | 97.19% | 0.897700 | 0.866700 | 0.01703000 | 0.02714000 | ENST00000258651 | upstream   | 766815 | ---       | ---      |
| rs1371088  | 12 | 89184864  | 0.2419 | 97.19% | 0.032170 | 0.092260 | 0.01704000 | 0.02992000 | ENST00000388111 | downstream | 539934 | ---       | ---      |
| rs1887129  | 13 | 57483769  | 0.3967 | 95.09% | 0.899700 | 0.877700 | 0.01706000 | 0.02708000 | ENST00000365552 | downstream | 20171  | ---       | ---      |
| rs10490206 | 2  | 40204350  | 0.4676 | 97.54% | 0.029940 | 0.052180 | 0.01707000 | 0.10680000 | NM_021097       | intron     | 0      | Hs.468274 | SLC8A1   |
| rs9311935  | 3  | 65128739  | 0.2623 | 92.98% | 0.038130 | 0.049300 | 0.01708000 | 0.02663000 | NM_001033057    | downstream | 188354 | Hs.651939 | MAGI1    |
| rs10519718 | 5  | 122481458 | 0.2191 | 88.07% | 0.853700 | 0.206800 | 0.01709000 | 0.07690000 | ENST00000261364 | intron     | 0      | ---       | ---      |
| rs10494789 | 1  | 197532204 | 0.3265 | 94.04% | 0.038220 | 0.868200 | 0.01710000 | 0.05956000 | ENST00000385491 | upstream   | 284666 | ---       | ---      |
| rs2219610  | 3  | 30737665  | 0.2126 | 89.12% | 1.000000 | 0.792600 | 0.01710000 | 0.10030000 | NM_207359       | downstream | 5031   | Hs.657052 | GADL1    |
| rs10488874 | 4  | 108640002 | 0.0369 | 95.09% | 0.304900 | 0.363800 | 0.01711000 | 0.07891000 | NM_005443       | downstream | 114270 | Hs.368610 | PAPSS1   |
| rs10515812 | 5  | 159927389 | 0.3563 | 91.58% | 0.078650 | 0.157800 | 0.01711000 | 0.09190000 | ENST00000327245 | intron     | 0      | ---       | ---      |
| rs2849380  | 18 | 59130340  | 0.1556 | 94.74% | 0.816800 | 1.000000 | 0.01712000 | 0.04608000 | NM_000657       | intron     | 0      | Hs.150749 | BCL2     |
| rs413853   | 1  | 75064286  | 0.4731 | 97.89% | 0.719300 | 0.881700 | 0.01712000 | 0.02758000 | NM_138467       | downstream | 60390  | Hs.348411 | TYW3     |
| rs1368120  | 4  | 70438719  | 0.2706 | 97.89% | 0.448700 | 0.381900 | 0.01713000 | 0.19220000 | NM_021139       | upstream   | 42507  | Hs.285887 | UGT2B4   |
| rs2591205  | 5  | 13687084  | 0.1641 | 89.82% | 0.255000 | 0.741400 | 0.01714000 | 0.07453000 | NM_001369       | downstream | 56353  | Hs.212360 | DNAH5    |
| rs440834   | 9  | 10091415  | 0.4101 | 93.68% | 0.527500 | 0.073020 | 0.01714000 | 0.00273400 | ENST00000363183 | downstream | 659063 | ---       | ---      |
| rs6699473  | 1  | 156761833 | 0.4755 | 92.98% | 0.267900 | 0.759800 | 0.01714000 | 0.13910000 | NM_001005189    | downstream | 21709  | Hs.553780 | OR6Y1    |
| rs920956   | 13 | 92901302  | 0.2104 | 90.88% | 0.350100 | 1.000000 | 0.01714000 | 0.02537000 | NM_005708       | intron     | 0      | Hs.444329 | GPC6     |
| rs10514305 | 5  | 88669444  | 0.0558 | 94.39% | 0.575100 | 1.000000 | 0.01715000 | 0.01576000 | NM_002397       | upstream   | 454626 | Hs.699175 | MEF2C    |
| rs10518943 | 15 | 55942641  | 0.4147 | 88.42% | 0.069450 | 0.030050 | 0.01715000 | 0.01641000 | NM_170697       | downstream | 90279  | Hs.699620 | ALDH1A2  |
| rs10487719 | 7  | 31309586  | 0.0236 | 96.49% | 0.135100 | 1.000000 | 0.01716000 | 0.02110000 | NM_022728       | downstream | 34021  | Hs.45152  | NEUROD6  |
| rs10501722 | 11 | 89921778  | 0.2312 | 93.33% | 1.000000 | 1.000000 | 0.01716000 | 0.01259000 | NM_012124       | upstream   | 325951 | Hs.22857  | CHORDC1  |
| rs1392909  | 4  | 14176869  | 0.1898 | 96.14% | 0.236800 | 0.387800 | 0.01717000 | 0.01076000 | ENST00000357803 | upstream   | 92751  | ---       | ---      |

|            |    |           |        |        |          |          |            |            |                 |            |         |           |           |
|------------|----|-----------|--------|--------|----------|----------|------------|------------|-----------------|------------|---------|-----------|-----------|
| rs17626707 | 13 | 27870743  | 0.2330 | 92.63% | 0.057400 | 0.442000 | 0.01724000 | 0.06120000 | NM_002019       | intron     | 0       | Hs.654360 | FLT1      |
| rs4442876  | 17 | 36446323  | 0.1087 | 88.77% | 1.000000 | 1.000000 | 0.01725000 | 0.21420000 | NM_030966       | downstream | 4319    | Hs.534495 | KRTAP1-3  |
| rs8102512  | 19 | 36360499  | 0.4387 | 94.39% | 0.620400 | 0.754440 | 0.01725000 | 0.20410000 | NM_020856       | downstream | 98341   | Hs.278436 | TSHZ3     |
| rs1948270  | 21 | 19679846  | 0.3340 | 87.72% | 0.117700 | 0.262900 | 0.01726000 | 0.02514000 | ENST00000387002 | downstream | 40346   | ---       | ---       |
| rs3908410  | 11 | 35546863  | 0.0242 | 94.39% | 1.000000 | 1.000000 | 0.01727000 | 0.01369000 | NM_001001991    | upstream   | 42708   | Hs.55044  | DKFZP586H |
| rs4575607  | 18 | 34747458  | 0.0993 | 97.19% | 0.739600 | 1.000000 | 0.01727000 | 0.02417000 | NM_020180       | upstream   | 1347517 | Hs.435976 | BRUNOL4   |
| rs542873   | 1  | 57487117  | 0.3656 | 97.89% | 0.155400 | 0.352800 | 0.01727000 | 0.04592000 | NM_021080       | intron     | 0       | Hs.477370 | DAB1      |
| rs10500833 | 11 | 18595429  | 0.1480 | 87.72% | 1.000000 | 1.000000 | 0.01728000 | 0.00248000 | NM_194285       | intron     | 0       | Hs.268668 | SPTY2D1   |
| rs2551397  | 18 | 59105557  | 0.3457 | 94.39% | 0.592800 | 0.481000 | 0.01729000 | 0.02347000 | NM_000657       | intron     | 0       | Hs.150749 | BCL2      |
| rs10504450 | 8  | 70626079  | 0.1221 | 91.93% | 0.144300 | 0.131300 | 0.01730000 | 0.05355000 | NM_015170       | intron     | 0       | Hs.409602 | SULF1     |
| rs4728928  | 7  | 90161222  | 0.3577 | 91.23% | 0.788200 | 0.211300 | 0.01731000 | 0.03267000 | ENST00000306129 | intron     | 0       | ---       | ---       |
| rs10493113 | 1  | 42931097  | 0.1864 | 97.89% | 0.329700 | 0.577400 | 0.01732000 | 0.01540000 | NM_004559       | intron     | 0       | Hs.473583 | YBX1      |
| rs1010390  | 13 | 80764540  | 0.4030 | 83.16% | 0.080040 | 0.489400 | 0.01733000 | 0.00315400 | ENST00000387380 | downstream | 26588   | ---       | ---       |
| rs1506065  | 4  | 114151779 | 0.3183 | 97.54% | 0.272200 | 0.141900 | 0.01733000 | 0.08129000 | NM_020977       | upstream   | 38540   | Hs.620557 | ANK2      |
| rs1598978  | 12 | 113008816 | 0.3963 | 94.74% | 0.525400 | 0.321600 | 0.01733000 | 0.08420000 | NM_016196       | upstream   | 120322  | Hs.7482   | RBM19     |
| rs10490110 | 2  | 59251013  | 0.2660 | 92.98% | 0.752700 | 0.674300 | 0.01734000 | 0.01262000 | ENST00000365640 | upstream   | 151806  | ---       | ---       |
| rs2837758  | 21 | 40940879  | 0.3723 | 97.54% | 0.522800 | 0.122200 | 0.01735000 | 0.00687100 | NM_206887       | intron     | 0       | ---       | DSCAM     |
| rs3012068  | 10 | 126707120 | 0.0198 | 88.42% | 1.000000 | 1.000000 | 0.01736000 | 0.99790000 | NM_001329       | intron     | 0       | Hs.501345 | CTBP2     |
| rs10485499 | 20 | 30677558  | 0.1774 | 92.98% | 0.289900 | 0.483100 | 0.01737000 | 0.05777000 | NM_001010976    | downstream | 17202   | ---       | PR11-410N |
| rs1442426  | 1  | 192267576 | 0.2296 | 94.74% | 0.119800 | 0.250300 | 0.01737000 | 0.01222000 | ENST00000385496 | upstream   | 299447  | ---       | ---       |
| rs10490803 | 3  | 171691928 | 0.1691 | 96.49% | 0.084440 | 0.058140 | 0.01738000 | 0.05132000 | NM_020949       | intron     | 0       | Hs.674783 | SLC7A14   |
| rs10498561 | 14 | 83013970  | 0.0735 | 97.89% | 0.648800 | 0.395800 | 0.01738000 | 0.02143000 | ENST00000387648 | downstream | 110158  | ---       | ---       |
| rs10505136 | 8  | 111210397 | 0.0735 | 97.89% | 0.648800 | 1.000000 | 0.01738000 | 0.05149000 | NM_014379       | upstream   | 154262  | Hs.13285  | KCNV1     |
| rs721569   | 2  | 185553368 | 0.0656 | 77.54% | 0.232000 | 0.266700 | 0.01738000 | 0.02216000 | NM_194250       | downstream | 41370   | Hs.159528 | ZNF804A   |
| rs1285405  | 7  | 9234454   | 0.2509 | 95.09% | 0.003374 | 0.026270 | 0.01740000 | 0.04686000 | NM_152745       | downstream | 476530  | Hs.487564 | NXP1      |
| rs2317212  | 3  | 98810974  | 0.3804 | 96.84% | 0.004981 | 0.013510 | 0.01740000 | 0.03703000 | ENST00000389672 | intron     | 0       | ---       | ---       |
| rs304861   | 5  | 152699455 | 0.0743 | 96.84% | 0.650900 | 1.000000 | 0.01740000 | 0.02773000 | NM_000827       | upstream   | 151044  | Hs.519693 | GRIA1     |
| rs955612   | 1  | 232783216 | 0.1679 | 97.19% | 0.386700 | 0.340700 | 0.01740000 | 0.06767000 | NM_005646       | upstream   | 101744  | Hs.498115 | TARBP1    |
| rs1038832  | 3  | 175168617 | 0.2251 | 95.09% | 0.484900 | 0.333700 | 0.01741000 | 0.10820000 | NM_014932       | intron     | 0       | Hs.478289 | NLGN1     |
| rs1903905  | 10 | 109261677 | 0.3284 | 95.09% | 0.890400 | 0.854200 | 0.01744000 | 0.02618000 | ENST00000363209 | downstream | 50260   | ---       | ---       |
| rs6753044  | 2  | 202873678 | 0.1399 | 94.04% | 0.617700 | 0.467700 | 0.01744000 | 0.03513000 | NM_015934       | intron     | 0       | Hs.471104 | NOP5/NOP5 |
| rs2295135  | 14 | 87963963  | 0.1667 | 97.89% | 0.524700 | 1.000000 | 0.01747000 | 0.04433000 | NM_001040428    | intron     | 0       | Hs.525518 | SPATA7    |
| rs1069977  | 3  | 64085175  | 0.1429 | 90.88% | 0.798300 | 0.701500 | 0.01748000 | 0.26790000 | NM_198859       | intron     | 0       | Hs.699317 | PRICKLE2  |
| rs168718   | 5  | 80477429  | 0.2441 | 89.82% | 0.313000 | 0.565200 | 0.01748000 | 0.02453000 | NM_006909       | intron     | 0       | Hs.162129 | RASGRF2   |
| rs215749   | 7  | 32424097  | 0.2886 | 86.32% | 0.534600 | 1.000000 | 0.01749000 | 0.05737000 | ENST00000381651 | upstream   | 30827   | ---       | ---       |
| rs3808227  | 7  | 90242612  | 0.1578 | 92.28% | 0.487000 | 0.451300 | 0.01751000 | 0.01666000 | NM_012395       | intron     | 0       | Hs.430742 | PFTK1     |
| rs1853326  | 13 | 36896714  | 0.2247 | 93.68% | 0.219700 | 0.626700 | 0.01753000 | 0.01492000 | NM_006475       | downstream | 138065  | Hs.136348 | POSTN     |
| rs9295481  | 6  | 20846555  | 0.3038 | 92.98% | 0.561600 | 0.051220 | 0.01753000 | 0.01210000 | NM_017774       | intron     | 0       | Hs.657604 | CDKAL1    |
| rs2170260  | 8  | 136149422 | 0.0996 | 96.84% | 0.326100 | 0.260500 | 0.01755000 | 0.05675000 | NM_006558       | upstream   | 389462  | Hs.444558 | KHDRBS3   |
| rs16920830 | 8  | 55921493  | 0.0310 | 96.14% | 1.000000 | 1.000000 | 0.01757000 | 0.05928000 | NM_006269       | downstream | 215546  | Hs.458845 | RP1       |
| rs1888057  | 13 | 32520695  | 0.1649 | 97.89% | 0.077820 | 0.050860 | 0.01757000 | 0.01693000 | NM_004795       | intron     | 0       | Hs.524953 | KL        |
| rs2166362  | 5  | 3695021   | 0.2952 | 95.09% | 0.143200 | 0.124300 | 0.01759000 | 0.00880700 | NM_024337       | downstream | 40504   | Hs.424156 | IRX1      |
| rs163234   | 16 | 20559524  | 0.3909 | 96.49% | 0.613900 | 0.744100 | 0.01761000 | 0.00776100 | NM_052956       | intron     | 0       | Hs.306812 | ACSM1     |
| rs334356   | 9  | 100949193 | 0.1882 | 97.89% | 0.431800 | 0.274300 | 0.01761000 | 0.01370000 | NM_004612       | intron     | 0       | Hs.494622 | TGFBR1    |
| rs2010269  | 7  | 51090457  | 0.4679 | 92.98% | 0.174400 | 0.363900 | 0.01762000 | 0.04157000 | NM_015198       | intron     | 0       | Hs.99141  | COBL      |
| rs2333634  | 18 | 62664021  | 0.4591 | 94.39% | 0.714000 | 0.653700 | 0.01763000 | 0.01708000 | NM_021153       | upstream   | 241825  | Hs.42771  | CDH19     |
| rs4901596  | 14 | 37659956  | 0.4478 | 94.04% | 0.621100 | 0.449300 | 0.01764000 | 0.02005000 | NM_001049       | upstream   | 86999   | Hs.248160 | SSTR1     |
| rs9310824  | 3  | 26944532  | 0.1930 | 95.44% | 0.845400 | 0.779400 | 0.01767000 | 0.13450000 | NM_052953       | downstream | 217266  | Hs.517868 | LRR3B     |
| rs10505808 | 12 | 17679831  | 0.0737 | 97.54% | 0.377900 | 1.000000 | 0.01768000 | 0.03324000 | ENST00000383935 | upstream   | 75304   | ---       | ---       |
| rs198057   | 21 | 23442474  | 0.1319 | 95.79% | 0.283600 | 0.149200 | 0.01771000 | 0.11340000 | ENST00000364042 | downstream | 133491  | ---       | ---       |
| rs2343606  | 16 | 24701242  | 0.2415 | 82.81% | 0.860500 | 0.842700 | 0.01773000 | 0.06062000 | NM_020847       | intron     | 0       | ---       | TNRC6A    |
| rs4669244  | 2  | 8228462   | 0.4612 | 85.96% | 0.002997 | 0.033920 | 0.01774000 | 0.11510000 | NM_207358       | downstream | 116457  | ---       | C2orf46   |
| rs478455   | 12 | 165807    | 0.1426 | 92.28% | 0.799500 | 1.000000 | 0.01774000 | 0.04387000 | NM_003044       | downstream | 3706    | Hs.437174 | SLC6A12   |
| rs1541350  | 17 | 13108765  | 0.2752 | 97.54% | 0.036370 | 0.080520 | 0.01775000 | 0.10090000 | NM_006042       | downstream | 230966  | Hs.462270 | HS3ST3A1  |

|            |    |           |        |        |          |          |            |            |                 |            |        |           |          |
|------------|----|-----------|--------|--------|----------|----------|------------|------------|-----------------|------------|--------|-----------|----------|
| rs2152853  | 1  | 179791481 | 0.1543 | 94.39% | 0.480900 | 0.730800 | 0.01775000 | 0.01951000 | NM_000721       | intron     | 0      | Hs.437444 | CACNA1E  |
| rs2063944  | 6  | 58703545  | 0.4303 | 88.07% | 0.094930 | 0.271700 | 0.01779000 | 0.01091000 | NM_206908       | upstream   | 307890 | ---       | GUSBL2   |
| rs7030902  | 9  | 87024911  | 0.3151 | 92.98% | 0.669300 | 0.578800 | 0.01780000 | 0.00448200 | NM_001018066    | downstream | 342278 | Hs.494312 | NTRK2    |
| rs1603182  | 4  | 85471690  | 0.4111 | 94.74% | 0.261100 | 0.196900 | 0.01781000 | 0.02655000 | NM_006168       | downstream | 161770 | Hs.546270 | NKX6-1   |
| rs10503076 | 18 | 58868191  | 0.0382 | 96.49% | 0.050540 | 1.000000 | 0.01784000 | 0.02522000 | NM_194449       | downstream | 69546  | Hs.465337 | PHLPP    |
| rs10510428 | 3  | 14592929  | 0.2611 | 94.74% | 0.430500 | 0.586300 | 0.01784000 | 0.06792000 | NM_016474       | upstream   | 75344  | Hs.517820 | C3orf19  |
| rs2312244  | 5  | 128493261 | 0.4794 | 93.68% | 0.624300 | 0.545000 | 0.01784000 | 0.07038000 | NM_016048       | downstream | 15649  | Hs.483296 | ISOC1    |
| rs4748503  | 10 | 18976085  | 0.4535 | 94.39% | 0.325900 | 0.131000 | 0.01784000 | 0.02060000 | NM_182543       | intron     | 0      | Hs.396175 | NSUN6    |
| rs9327861  | 5  | 101895776 | 0.2620 | 95.09% | 0.160400 | 0.208900 | 0.01785000 | 0.11370000 | NM_173488       | upstream   | 33186  | Hs.388874 | SLCO6A1  |
| rs953359   | 4  | 185428506 | 0.2756 | 89.12% | 0.875000 | 1.000000 | 0.01786000 | 0.04259000 | NM_153343       | upstream   | 52493  | Hs.297814 | ENPP6    |
| rs1876482  | 2  | 17226049  | 0.1927 | 96.49% | 0.559600 | 0.576800 | 0.01787000 | 0.27870000 | NM_003385       | upstream   | 359240 | Hs.444212 | VSNL1    |
| rs10498134 | 2  | 222813224 | 0.3736 | 91.58% | 0.895000 | 0.431000 | 0.01788000 | 0.00695200 | NM_181460       | intron     | 0      | Hs.42146  | PAX3     |
| rs1407043  | 20 | 52438394  | 0.1697 | 97.19% | 0.669300 | 0.755100 | 0.01789000 | 0.11290000 | NM_018431       | upstream   | 87194  | Hs.656582 | DOK5     |
| rs10502192 | 11 | 114127562 | 0.4831 | 93.33% | 0.902200 | 0.758800 | 0.01790000 | 0.02173000 | NM_182495       | downstream | 44067  | ---       | FAM55B   |
| rs10512369 | 9  | 109805180 | 0.2019 | 94.74% | 1.000000 | 0.673300 | 0.01791000 | 0.09605000 | ENST00000297812 | upstream   | 168249 | ---       | ---      |
| rs1411439  | 9  | 71403874  | 0.0480 | 95.09% | 0.467100 | 0.147200 | 0.01791000 | 0.11950000 | NM_001163       | intron     | 0      | Hs.695952 | APBA1    |
| rs10502535 | 18 | 25738740  | 0.1034 | 93.33% | 0.174300 | 0.071270 | 0.01794000 | 0.02050000 | ENST00000384802 | downstream | 708250 | ---       | ---      |
| rs1529236  | 7  | 9211096   | 0.0306 | 97.54% | 1.000000 | 1.000000 | 0.01795000 | 0.05499000 | NM_152745       | downstream | 453172 | Hs.487564 | NXPH1    |
| rs6804032  | 3  | 116031161 | 0.1791 | 94.04% | 0.535300 | 1.000000 | 0.01795000 | 0.06174000 | NM_015642       | intron     | 0      | Hs.655108 | ZBTB20   |
| rs9294029  | 6  | 77626834  | 0.3556 | 94.74% | 0.045740 | 0.085680 | 0.01795000 | 0.01465000 | NM_000863       | downstream | 601833 | Hs.123016 | HTR1B    |
| rs719379   | 4  | 40537658  | 0.3849 | 97.54% | 0.526200 | 0.220400 | 0.01797000 | 0.03285000 | NM_173075       | intron     | 0      | Hs.479602 | APBB2    |
| rs385064   | 8  | 86612641  | 0.1854 | 74.74% | 0.174200 | 1.000000 | 0.01799000 | 0.09579000 | NM_000067       | downstream | 31696  | Hs.155097 | CA2      |
| rs334961   | 3  | 18586159  | 0.2192 | 96.84% | 0.078430 | 0.112800 | 0.01802000 | 0.00680500 | NM_002971       | upstream   | 130951 | Hs.517717 | SATB1    |
| rs3771372  | 2  | 71478662  | 0.0926 | 94.74% | 0.143400 | 1.000000 | 0.01802000 | 0.04904000 | NM_001014972    | intron     | 0      | Hs.434401 | ZNF638   |
| rs2204410  | 7  | 142886781 | 0.1803 | 94.39% | 0.542400 | 0.770100 | 0.01803000 | 0.01387000 | ENST00000385583 | downstream | 25433  | ---       | ---      |
| rs8055123  | 16 | 10953220  | 0.1260 | 91.93% | 0.577200 | 1.000000 | 0.01803000 | 0.01377000 | NM_015226       | intron     | 0      | Hs.35490  | CLEC16A  |
| rs1938577  | 1  | 70080009  | 0.1774 | 92.98% | 0.525800 | 0.479900 | 0.01804000 | 0.08597000 | NM_020794       | intron     | 0      | Hs.479658 | LRRC7    |
| rs3740798  | 11 | 35663356  | 0.0784 | 82.81% | 0.040910 | 0.046770 | 0.01804000 | 0.09501000 | NM_017583       | intron     | 0      | Hs.591987 | TRIM44   |
| rs719139   | 2  | 224043745 | 0.2296 | 94.74% | 0.734000 | 0.845300 | 0.01805000 | 0.13510000 | NM_003469       | downstream | 126161 | Hs.516726 | SCG2     |
| rs10513958 | 18 | 65066396  | 0.0481 | 94.74% | 1.000000 | 1.000000 | 0.01806000 | 0.00438600 | NM_152721       | upstream   | 152875 | Hs.569915 | DOK6     |
| rs1816239  | 19 | 33307040  | 0.3172 | 97.89% | 0.409400 | 0.853400 | 0.01806000 | 0.05203000 | ENST00000379373 | upstream   | 477982 | ---       | ---      |
| rs1349063  | 12 | 84788368  | 0.2243 | 95.44% | 1.000000 | 0.843700 | 0.01807000 | 0.11000000 | NM_006183       | upstream   | 3838   | Hs.80962  | NTS      |
| rs1279321  | 14 | 32657928  | 0.1222 | 93.33% | 0.249000 | 0.376800 | 0.01813000 | 0.05889000 | NM_022123       | intron     | 0      | Hs.659456 | NPAS3    |
| rs9323727  | 14 | 82420103  | 0.1895 | 89.82% | 0.023660 | 0.367900 | 0.01813000 | 0.01379000 | ENST00000362427 | upstream   | 164572 | ---       | ---      |
| rs4131048  | 10 | 124981713 | 0.3795 | 97.54% | 0.612000 | 0.739800 | 0.01814000 | 0.03881000 | NM_153442       | upstream   | 434148 | Hs.12751  | GPR26    |
| rs10496839 | 2  | 140766339 | 0.2482 | 96.14% | 0.517100 | 1.000000 | 0.01816000 | 0.03956000 | NM_018557       | intron     | 0      | Hs.656461 | LRP1B    |
| rs10485064 | 6  | 85653291  | 0.0185 | 95.09% | 1.000000 | 1.000000 | 0.01818000 | 0.99780000 | ENST00000230608 | upstream   | 122673 | ---       | ---      |
| rs10496804 | 2  | 139392949 | 0.0307 | 97.19% | 1.000000 | 1.000000 | 0.01818000 | 0.01092000 | ENST00000363563 | upstream   | 55014  | ---       | ---      |
| rs1885373  | 9  | 35686802  | 0.0185 | 95.09% | 1.000000 | 1.000000 | 0.01818000 | 0.99780000 | NM_006289       | downstream | 536    | Hs.471014 | TLN1     |
| rs496289   | 11 | 36484917  | 0.0185 | 95.09% | 1.000000 | 1.000000 | 0.01818000 | 0.99780000 | NM_004620       | intron     | 0      | Hs.591983 | TRAF6    |
| rs7984449  | 13 | 52641443  | 0.0185 | 95.09% | 0.081040 | 0.121800 | 0.01818000 | 0.99770000 | NM_006418       | downstream | 117256 | Hs.559736 | OLFM4    |
| rs962353   | 11 | 36521184  | 0.0185 | 95.09% | 1.000000 | 1.000000 | 0.01818000 | 0.99780000 | NM_000448       | upstream   | 24955  | Hs.73958  | RAG1     |
| rs10487395 | 7  | 117678691 | 0.0645 | 97.89% | 0.314600 | 1.000000 | 0.01819000 | 0.06408000 | NM_019644       | downstream | 8714   | Hs.657737 | ANKRD7   |
| rs2057684  | 7  | 117678408 | 0.0645 | 97.89% | 0.314600 | 1.000000 | 0.01819000 | 0.06408000 | NM_019644       | downstream | 8431   | Hs.657737 | ANKRD7   |
| rs2057685  | 7  | 117678603 | 0.0645 | 97.89% | 0.314600 | 1.000000 | 0.01819000 | 0.06408000 | NM_019644       | downstream | 8626   | Hs.657737 | ANKRD7   |
| rs4947461  | 7  | 54377737  | 0.3851 | 91.58% | 0.515900 | 0.866200 | 0.01819000 | 0.00168300 | NM_001001707    | upstream   | 530627 | ---       | FLJ45974 |
| rs1407513  | 6  | 168894852 | 0.0310 | 96.14% | 1.000000 | 1.000000 | 0.01821000 | 0.03727000 | NM_022138       | downstream | 84253  | Hs.487200 | SMOC2    |
| rs156372   | 5  | 174888400 | 0.1592 | 93.68% | 0.258100 | 0.452500 | 0.01822000 | 0.04927000 | NM_022754       | downstream | 110    | Hs.369440 | SFXN1    |
| rs10503665 | 8  | 19664614  | 0.1057 | 92.98% | 0.187200 | 0.281700 | 0.01823000 | 0.05698000 | NM_018142       | upstream   | 54663  | Hs.512627 | INTS10   |
| rs2354327  | 14 | 61809577  | 0.1057 | 92.98% | 0.000000 | 0.001398 | 0.01823000 | 0.00783300 | NM_001039785    | downstream | 138923 | ---       | FLJ43390 |
| rs9300689  | 13 | 101100765 | 0.2176 | 97.54% | 0.295600 | 0.022620 | 0.01823000 | 0.02645000 | NM_004791       | intron     | 0      | Hs.696554 | ITGBL1   |
| rs1114531  | 4  | 183281048 | 0.1222 | 94.74% | 0.392700 | 0.377800 | 0.01824000 | 0.03952000 | ENST00000315302 | downstream | 18753  | ---       | ---      |
| rs1916309  | 9  | 14995594  | 0.2482 | 97.54% | 0.872200 | 1.000000 | 0.01825000 | 0.01044000 | NM_144966       | upstream   | 136619 | Hs.50850  | FREM1    |
| rs260970   | 1  | 39323829  | 0.1188 | 84.21% | 0.117200 | 0.528700 | 0.01825000 | 0.00579700 | NM_012090       | intron     | 0      | Hs.580782 | MACF1    |



|            |    |           |        |        |          |          |            |            |                 |            |        |           |           |
|------------|----|-----------|--------|--------|----------|----------|------------|------------|-----------------|------------|--------|-----------|-----------|
| rs285046   | 13 | 97554998  | 0.0796 | 94.74% | 0.678300 | 0.465400 | 0.01827000 | 0.14770000 | NM_001001715    | upstream   | 38437  | Hs.403917 | FARP1     |
| rs10490434 | 2  | 16897839  | 0.1762 | 85.61% | 0.024840 | 0.103700 | 0.01828000 | 0.05249000 | NM_030797       | upstream   | 187256 | Hs.467769 | FAM49A    |
| rs10507384 | 13 | 27877480  | 0.2315 | 94.74% | 0.231800 | 1.000000 | 0.01828000 | 0.06191000 | NM_002019       | intron     | 0      | Hs.654360 | FLT1      |
| rs2454018  | 8  | 104182183 | 0.3255 | 97.54% | 0.585000 | 0.202100 | 0.01829000 | 0.02995000 | NM_001024372    | upstream   | 39914  | Hs.533446 | BAALC     |
| rs529618   | 11 | 115994188 | 0.1350 | 96.14% | 0.191100 | 0.260300 | 0.01829000 | 0.02236000 | NM_032725       | downstream | 129908 | Hs.437341 | BUD13     |
| rs10496931 | 2  | 143033741 | 0.0798 | 92.28% | 0.672700 | 0.677600 | 0.01830000 | 0.01473000 | NM_001032998    | upstream   | 317924 | Hs.470126 | KYNU      |
| rs6054326  | 20 | 6444783   | 0.1610 | 51.23% | 1.000000 | 1.000000 | 0.01830000 | 0.03156000 | NM_001200       | upstream   | 251962 | Hs.73853  | BMP2      |
| rs10504472 | 8  | 71403032  | 0.1504 | 96.84% | 0.476400 | 0.606200 | 0.01831000 | 0.01519000 | NM_006540       | intron     | 0      | Hs.446678 | NCOA2     |
| rs2965710  | 12 | 11478437  | 0.4357 | 95.44% | 0.540300 | 0.434600 | 0.01831000 | 0.03426000 | NM_199354       | upstream   | 38684  | Hs.631726 | PRB1      |
| rs10505807 | 12 | 17419266  | 0.4705 | 95.09% | 0.903000 | 0.445300 | 0.01833000 | 0.00709400 | ENST00000386797 | upstream   | 303560 | ---       | ---       |
| rs634050   | 11 | 84433193  | 0.4453 | 86.67% | 0.020660 | 0.137800 | 0.01833000 | 0.06481000 | ENST00000376104 | intron     | 0      | ---       | ---       |
| rs10493228 | 1  | 57759841  | 0.2611 | 94.74% | 0.344600 | 0.010650 | 0.01835000 | 0.02909000 | NM_021080       | intron     | 0      | Hs.477370 | DAB1      |
| rs1947942  | 15 | 99686574  | 0.2814 | 97.89% | 0.053190 | 0.015150 | 0.01835000 | 0.00315900 | NM_138321       | intron     | 0      | Hs.498494 | PCSK6     |
| rs2166480  | 2  | 135353808 | 0.3840 | 92.28% | 0.896700 | 0.754300 | 0.01836000 | 0.10280000 | NM_138326       | intron     | 0      | Hs.655728 | ACMSD     |
| rs971120   | 2  | 76815026  | 0.3657 | 94.04% | 0.357700 | 0.608300 | 0.01838000 | 0.04293000 | NM_024993       | downstream | 14303  | Hs.285782 | LRRTM4    |
| rs10486315 | 7  | 18883166  | 0.0305 | 97.89% | 1.000000 | 1.000000 | 0.01839000 | 0.02803000 | NM_178425       | intron     | 0      | Hs.196054 | HDAC9     |
| rs10496171 | 2  | 69868685  | 0.2574 | 94.74% | 0.427200 | 1.000000 | 0.01839000 | 0.05842000 | NM_001153       | intron     | 0      | Hs.422986 | ANXA4     |
| rs333856   | 2  | 117692216 | 0.0305 | 97.89% | 1.000000 | 1.000000 | 0.01839000 | 0.18180000 | NM_006773       | upstream   | 596509 | Hs.363492 | DDX18     |
| rs532827   | 5  | 39961142  | 0.4018 | 96.49% | 0.380500 | 0.746200 | 0.01839000 | 0.01967000 | NM_001343       | upstream   | 500439 | Hs.481980 | DAB2      |
| rs10499634 | 7  | 45442863  | 0.0578 | 94.04% | 1.000000 | 1.000000 | 0.01840000 | 0.00936900 | NM_021116       | upstream   | 137805 | Hs.192215 | ADCY1     |
| rs4468424  | 12 | 94218737  | 0.1007 | 97.54% | 0.747400 | 0.734000 | 0.01840000 | 0.03331000 | NM_017599       | 3UTR       | 0      | Hs.24135  | VEZT      |
| rs10484056 | 14 | 98009509  | 0.0308 | 96.84% | 1.000000 | 1.000000 | 0.01843000 | 0.00996100 | NM_182560       | upstream   | 238194 | Hs.448754 | C14orf177 |
| rs10484996 | 6  | 97341865  | 0.3670 | 93.68% | 0.599300 | 0.638100 | 0.01843000 | 0.15840000 | NM_030784       | downstream | 10780  | Hs.632612 | GPR63     |
| rs1876091  | 3  | 63566006  | 0.3239 | 92.63% | 0.090860 | 0.139400 | 0.01843000 | 0.07019000 | NM_144642       | intron     | 0      | Hs.648668 | SYNPR     |
| rs1987295  | 14 | 40452545  | 0.4981 | 94.74% | 0.466700 | 0.652000 | 0.01847000 | 0.01015000 | NM_152447       | upstream   | 693978 | Hs.136893 | LRFN5     |
| rs2055056  | 8  | 96347246  | 0.1370 | 94.74% | 0.126100 | 0.127400 | 0.01848000 | 0.02974000 | NM_177965       | intron     | 0      | Hs.548157 | C8orf37   |
| rs922522   | 13 | 94512496  | 0.0769 | 95.79% | 0.013460 | 0.012760 | 0.01848000 | 0.09918000 | NM_005845       | intron     | 0      | Hs.508423 | ABCC4     |
| rs9301679  | 13 | 89938730  | 0.2797 | 91.58% | 0.091230 | 0.534900 | 0.01849000 | 0.06413000 | ENST00000385123 | downstream | 257198 | ---       | ---       |
| rs10509874 | 10 | 110332098 | 0.0698 | 90.53% | 1.000000 | 1.000000 | 0.01850000 | 0.07212000 | ENST00000388288 | downstream | 358723 | ---       | ---       |
| rs2170177  | 3  | 51324927  | 0.2260 | 87.72% | 0.717100 | 0.682500 | 0.01850000 | 0.10450000 | NM_004947       | intron     | 0      | Hs.476284 | DOCK3     |
| rs10515586 | 5  | 146747481 | 0.1481 | 91.23% | 1.000000 | 1.000000 | 0.01852000 | 0.05178000 | NM_001387       | downstream | 3088   | Hs.519659 | DPYSL3    |
| rs10510017 | 10 | 118109971 | 0.1635 | 93.33% | 1.000000 | 0.628200 | 0.01853000 | 0.00472800 | NM_198515       | intron     | 0      | Hs.233407 | C10orf96  |
| rs1510063  | 5  | 83732185  | 0.4299 | 95.09% | 0.217600 | 0.285900 | 0.01853000 | 0.07075000 | NM_005711       | upstream   | 15818  | Hs.482730 | EDIL3     |
| rs10518875 | 15 | 34446568  | 0.4833 | 94.39% | 0.903000 | 0.445400 | 0.01854000 | 0.03433000 | NM_080650       | upstream   | 820912 | Hs.107196 | ATPBD4    |
| rs4374314  | 2  | 143033630 | 0.0761 | 96.84% | 0.661400 | 0.664100 | 0.01854000 | 0.01219000 | NM_001032998    | upstream   | 318035 | Hs.470126 | KYNU      |
| rs10519933 | 4  | 149135887 | 0.0808 | 93.33% | 0.682100 | 1.000000 | 0.01855000 | 0.05485000 | NM_024605       | intron     | 0      | Hs.368631 | ARHGAP10  |
| rs1525169  | 2  | 149752898 | 0.1004 | 97.89% | 0.089290 | 0.079910 | 0.01855000 | 0.06562000 | NM_177964       | intron     | 0      | Hs.357567 | LOC130576 |
| rs10509393 | 10 | 79596991  | 0.1434 | 92.98% | 0.450600 | 0.283800 | 0.01859000 | 0.04325000 | NM_001026       | downstream | 126514 | Hs.356794 | RPS24     |
| rs6878331  | 5  | 38617821  | 0.0198 | 88.77% | 1.000000 | 1.000000 | 0.01859000 | 0.99780000 | NM_002310       | intron     | 0      | Hs.133421 | LIFR      |
| rs10491442 | 5  | 58925052  | 0.1648 | 92.63% | 0.657700 | 0.524400 | 0.01860000 | 0.10170000 | ENST00000340635 | intron     | 0      | ---       | ---       |
| rs2867321  | 19 | 57117898  | 0.1399 | 94.04% | 1.000000 | 1.000000 | 0.01861000 | 0.02142000 | NM_024840       | upstream   | 4643   | Hs.183390 | ZNF613    |
| rs10513444 | 3  | 154487391 | 0.0492 | 92.63% | 0.476400 | 1.000000 | 0.01863000 | 0.04312000 | ENST00000383956 | upstream   | 86895  | ---       | ---       |
| rs1390762  | 16 | 49452675  | 0.2724 | 94.04% | 0.442100 | 0.679700 | 0.01863000 | 0.03457000 | NM_001042412    | downstream | 62646  | Hs.578973 | CYLD      |
| rs2354340  | 7  | 138289024 | 0.0685 | 94.74% | 0.355200 | 0.625100 | 0.01864000 | 0.04715000 | NM_080660       | downstream | 71968  | Hs.659143 | ZC3HAV1L  |
| rs1566313  | 12 | 114343491 | 0.4880 | 87.37% | 0.003447 | 0.002592 | 0.01865000 | 0.15710000 | ENST00000386460 | upstream   | 296416 | ---       | ---       |
| rs769657   | 4  | 141097109 | 0.1505 | 97.89% | 0.354200 | 1.000000 | 0.01868000 | 0.05719000 | NM_018171       | upstream   | 65529  | ---       | MAML3     |
| rs10496582 | 2  | 122835251 | 0.3713 | 94.04% | 0.359800 | 0.238800 | 0.01870000 | 0.12650000 | NM_004622       | downstream | 595838 | Hs.75066  | TSN       |
| rs1399141  | 13 | 60238751  | 0.4554 | 94.39% | 0.085010 | 0.093860 | 0.01871000 | 0.07341000 | ENST00000384127 | upstream   | 22944  | ---       | ---       |
| rs1539804  | 18 | 5949258   | 0.2491 | 97.89% | 0.148800 | 0.041260 | 0.01871000 | 0.08412000 | ENST00000317931 | intron     | 0      | ---       | ---       |
| rs2025503  | 6  | 23701746  | 0.2500 | 97.54% | 0.338300 | 0.380700 | 0.01871000 | 0.07768000 | ENST00000330282 | upstream   | 261115 | ---       | ---       |
| rs2328411  | 20 | 19495213  | 0.2500 | 97.54% | 0.423600 | 0.119700 | 0.01871000 | 0.02141000 | NM_020689       | intron     | 0      | Hs.654790 | SLC24A3   |
| rs266175   | 2  | 107417762 | 0.1918 | 97.89% | 0.846400 | 1.000000 | 0.01875000 | 0.03723000 | NM_032528       | upstream   | 548720 | Hs.98265  | ST6GAL2   |
| rs266177   | 2  | 107417947 | 0.1918 | 97.89% | 0.846400 | 1.000000 | 0.01875000 | 0.03723000 | NM_032528       | upstream   | 548905 | Hs.98265  | ST6GAL2   |
| rs10504934 | 8  | 95274323  | 0.3382 | 96.49% | 0.139000 | 0.284000 | 0.01876000 | 0.00843200 | NM_004063       | intron     | 0      | Hs.591853 | CDH17     |

|            |    |           |        |        |          |          |            |            |                 |            |        |           |           |
|------------|----|-----------|--------|--------|----------|----------|------------|------------|-----------------|------------|--------|-----------|-----------|
| rs2333537  | 14 | 28645046  | 0.1018 | 96.49% | 0.750000 | 0.735200 | 0.01876000 | 0.04215000 | ENST00000386746 | upstream   | 123679 | ---       | ---       |
| rs2645220  | 10 | 4061978   | 0.1115 | 91.23% | 0.220000 | 0.318500 | 0.01876000 | 0.09853000 | NM_001300       | upstream   | 244511 | Hs.4055   | KLF6      |
| rs10506230 | 12 | 42320036  | 0.3939 | 97.54% | 0.900000 | 0.743600 | 0.01877000 | 0.04998000 | NM_175851       | upstream   | 88045  | ---       | ADAMTS20  |
| rs597941   | 1  | 57530112  | 0.4622 | 88.07% | 0.611300 | 0.215200 | 0.01877000 | 0.08894000 | NM_021080       | intron     | 0      | Hs.477370 | DAB1      |
| rs2548003  | 5  | 28783080  | 0.4228 | 95.44% | 1.000000 | 0.879000 | 0.01879000 | 0.11130000 | ENST00000387488 | downstream | 122451 | ---       | ---       |
| rs1106185  | 2  | 10881021  | 0.4834 | 95.09% | 0.273800 | 0.651000 | 0.01881000 | 0.00249900 | NM_005742       | upstream   | 10600  | Hs.212102 | PDIA6     |
| rs4978512  | 9  | 114700189 | 0.2539 | 90.53% | 0.322900 | 1.000000 | 0.01884000 | 0.03117000 | NM_033051       | upstream   | 7175   | Hs.512668 | SLC46A2   |
| rs10500387 | 16 | 12622680  | 0.1236 | 95.09% | 0.094240 | 0.382100 | 0.01886000 | 0.05191000 | NM_018340       | downstream | 41758  | Hs.460002 | FLJ11151  |
| rs487707   | 11 | 113955918 | 0.2917 | 96.84% | 0.382000 | 0.864900 | 0.01886000 | 0.02198000 | NM_017678       | intron     | 0      | Hs.179100 | FAM55D    |
| rs720605   | 14 | 55957690  | 0.2941 | 95.44% | 0.190500 | 0.301200 | 0.01886000 | 0.00514900 | NM_021255       | downstream | 119917 | Hs.657926 | PEL12     |
| rs7018877  | 9  | 16600703  | 0.0519 | 91.23% | 1.000000 | 1.000000 | 0.01889000 | 0.01939000 | NM_017637       | intron     | 0      | Hs.656581 | BNC2      |
| rs2843070  | 6  | 63510470  | 0.4063 | 84.21% | 0.015660 | 0.014990 | 0.01890000 | 0.02364000 | ENST00000384941 | upstream   | 59338  | ---       | ---       |
| rs4145660  | 5  | 83611438  | 0.3989 | 97.19% | 0.380100 | 0.879600 | 0.01893000 | 0.00362500 | NM_005711       | intron     | 0      | Hs.482730 | EDIL3     |
| rs1961415  | 13 | 21382460  | 0.0957 | 80.70% | 0.000002 | 0.000012 | 0.01894000 | 0.05706000 | ENST00000386670 | downstream | 119476 | ---       | ---       |
| rs6849746  | 4  | 112063535 | 0.0793 | 95.09% | 1.000000 | 1.000000 | 0.01894000 | 0.08725000 | NM_000325       | upstream   | 299832 | Hs.643588 | PITX2     |
| rs646983   | 13 | 29413553  | 0.2860 | 90.18% | 0.444800 | 0.078160 | 0.01895000 | 0.06425000 | NM_001010918    | intron     | 0      | ---       | LOC440131 |
| rs1048829  | 2  | 203138701 | 0.3717 | 94.39% | 0.604000 | 0.614300 | 0.01896000 | 0.07742000 | NM_001204       | 3UTR       | 0      | Hs.471119 | BMPR2     |
| rs10489061 | 4  | 15958047  | 0.0921 | 93.33% | 0.254500 | 0.240100 | 0.01898000 | 0.01435000 | NM_152684       | downstream | 118664 | ---       | FLJ39653  |
| rs1399664  | 18 | 25073597  | 0.0246 | 78.60% | 1.000000 | 1.000000 | 0.01898000 | 0.99770000 | ENST00000384802 | downstream | 43107  | ---       | ---       |
| rs3754743  | 2  | 173710338 | 0.1715 | 97.19% | 0.134800 | 0.163500 | 0.01900000 | 0.16670000 | NM_133646       | intron     | 0      | Hs.444451 | ZAK       |
| rs10489832 | 1  | 156720980 | 0.1328 | 89.82% | 0.095940 | 0.405700 | 0.01901000 | 0.07907000 | NM_001004472    | downstream | 3681   | Hs.704755 | OR10R2    |
| rs1105047  | 2  | 202911203 | 0.2416 | 93.68% | 0.406300 | 0.257900 | 0.01901000 | 0.05059000 | ENST00000385404 | downstream | 4507   | ---       | ---       |
| rs10489069 | 4  | 9887766   | 0.1447 | 93.33% | 0.217900 | 0.291900 | 0.01904000 | 0.01695000 | NM_005112       | upstream   | 160095 | Hs.128548 | WDR1      |
| rs2327597  | 20 | 11909243  | 0.1241 | 94.74% | 1.000000 | 0.225200 | 0.01904000 | 0.07029000 | NM_181443       | downstream | 54000  | Hs.702048 | BTBD3     |
| rs10518147 | 4  | 77541071  | 0.1757 | 96.84% | 0.021650 | 0.378600 | 0.01905000 | 0.00187500 | NM_178555       | intron     | 0      | ---       | FLJ25770  |
| rs2355145  | 7  | 11898092  | 0.4570 | 89.82% | 0.614500 | 1.000000 | 0.01905000 | 0.01979000 | NM_018374       | upstream   | 322861 | Hs.396358 | TMEM106B  |
| rs2828759  | 21 | 24340799  | 0.3388 | 96.84% | 0.178300 | 0.021050 | 0.01907000 | 0.12300000 | ENST00000355181 | upstream   | 442342 | ---       | ---       |
| rs9554928  | 13 | 102468201 | 0.3708 | 95.09% | 0.009162 | 0.011030 | 0.01907000 | 0.02302000 | NM_000452       | downstream | 26150  | Hs.194783 | SLC10A2   |
| rs970761   | 7  | 66763047  | 0.0878 | 97.89% | 0.145500 | 0.232800 | 0.01908000 | 0.00352700 | ENST00000388509 | upstream   | 260994 | ---       | ---       |
| rs1718582  | 7  | 68301997  | 0.3224 | 85.96% | 0.466000 | 0.610700 | 0.01911000 | 0.05358000 | ENST00000363319 | downstream | 73698  | ---       | ---       |
| rs2593686  | 11 | 22346871  | 0.2194 | 97.54% | 0.599000 | 1.000000 | 0.01911000 | 0.04583000 | NM_020346       | intron     | 0      | Hs.242821 | SLC17A6   |
| rs6794333  | 3  | 133643347 | 0.1868 | 92.98% | 0.690400 | 1.000000 | 0.01912000 | 0.13770000 | NM_015268       | intron     | 0      | Hs.12707  | DNAJC13   |
| rs10507821 | 13 | 73492535  | 0.1889 | 76.14% | 1.000000 | 0.528100 | 0.01915000 | 0.01927000 | NM_007249       | intron     | 0      | Hs.373857 | KLF12     |
| rs181130   | 2  | 8190471   | 0.3315 | 97.89% | 0.279200 | 0.719400 | 0.01918000 | 0.00494700 | NM_207358       | downstream | 154448 | ---       | C2orf46   |
| rs617739   | 6  | 165816934 | 0.2316 | 85.61% | 1.000000 | 1.000000 | 0.01918000 | 0.07601000 | NM_006661       | intron     | 0      | Hs.584856 | PDE10A    |
| rs10501721 | 11 | 89921579  | 0.2361 | 94.39% | 0.866000 | 1.000000 | 0.01921000 | 0.01627000 | NM_012124       | upstream   | 325752 | Hs.22857  | CHORDC1   |
| rs1021428  | 4  | 11484791  | 0.0769 | 95.79% | 0.663900 | 0.664100 | 0.01925000 | 0.02493000 | NM_005114       | upstream   | 444304 | Hs.507348 | HS3ST1    |
| rs10520241 | 2  | 79525360  | 0.0206 | 93.68% | 1.000000 | 1.000000 | 0.01925000 | 0.99770000 | NM_138937       | upstream   | 284973 | Hs.567312 | REG3A     |
| rs953896   | 6  | 54639908  | 0.4070 | 90.53% | 0.700100 | 0.637400 | 0.01925000 | 0.01065000 | NM_014464       | downstream | 277038 | Hs.127011 | TINAG     |
| rs10484717 | 6  | 128221953 | 0.0156 | 90.18% | 1.000000 | 1.000000 | 0.01926000 | 0.02811000 | NM_001010923    | intron     | 0      | Hs.661756 | C6orf190  |
| rs10516456 | 4  | 100878532 | 0.1090 | 93.33% | 0.022810 | 0.360500 | 0.01926000 | 0.10540000 | NM_014395       | upstream   | 78481  | Hs.436271 | DAPP1     |
| rs9286854  | 1  | 170633429 | 0.4101 | 97.54% | 0.001924 | 0.000496 | 0.01927000 | 0.17120000 | NM_015569       | intron     | 0      | Hs.654775 | DNM3      |
| rs10503576 | 8  | 16179617  | 0.1139 | 90.88% | 0.218500 | 0.366300 | 0.01933000 | 0.00946600 | NM_138716       | upstream   | 85022  | Hs.147635 | MSR1      |
| rs4404787  | 6  | 129422719 | 0.0205 | 94.04% | 1.000000 | 1.000000 | 0.01934000 | 0.99800000 | NM_000426       | CDS        | 0      | Hs.200841 | LAMA2     |
| rs10502797 | 18 | 38584413  | 0.0203 | 95.09% | 1.000000 | 1.000000 | 0.01935000 | 0.99760000 | NM_002930       | intron     | 0      | Hs.464985 | RIT2      |
| rs2828309  | 21 | 23887126  | 0.0203 | 95.09% | 1.000000 | 1.000000 | 0.01935000 | 0.99760000 | ENST00000362828 | upstream   | 160653 | ---       | ---       |
| rs10501558 | 11 | 83709460  | 0.1880 | 93.33% | 0.070190 | 0.017590 | 0.01936000 | 0.02881000 | ENST00000376104 | intron     | 0      | ---       | ---       |
| rs976436   | 12 | 24985125  | 0.1380 | 87.72% | 0.281100 | 0.428900 | 0.01937000 | 0.12000000 | NM_005504       | upstream   | 39033  | Hs.438993 | BCAT1     |
| rs10512035 | 9  | 1913359   | 0.0899 | 97.54% | 0.709100 | 0.701900 | 0.01938000 | 0.01317000 | NM_139045       | upstream   | 91983  | Hs.298990 | SMARCA2   |
| rs10489833 | 1  | 156757075 | 0.4777 | 94.39% | 0.328700 | 0.759300 | 0.01940000 | 0.19230000 | NM_001005189    | downstream | 26467  | Hs.553780 | OR6Y1     |
| rs10498019 | 2  | 215197842 | 0.0204 | 94.74% | 1.000000 | 1.000000 | 0.01940000 | 0.99770000 | ENST00000312710 | upstream   | 72862  | ---       | ---       |
| rs2369705  | 4  | 5487491   | 0.1563 | 78.60% | 0.001968 | 0.054410 | 0.01940000 | 0.03855000 | NM_018401       | intron     | 0      | Hs.133062 | STK32B    |
| rs983459   | 12 | 16543428  | 0.0771 | 97.89% | 1.000000 | 0.429700 | 0.01940000 | 0.00412000 | NM_001001395    | downstream | 49146  | Hs.504908 | LMO3      |
| rs10507254 | 12 | 113821356 | 0.3024 | 73.68% | 0.070820 | 0.127800 | 0.01941000 | 0.03479000 | ENST00000386518 | downstream | 161353 | ---       | ---       |

|            |    |           |        |        |          |          |            |            |                 |            |         |           |           |
|------------|----|-----------|--------|--------|----------|----------|------------|------------|-----------------|------------|---------|-----------|-----------|
| rs4774383  | 15 | 59105220  | 0.3277 | 92.63% | 0.017390 | 0.020440 | 0.01943000 | 0.04402000 | NM_134261       | intron     | 0       | Hs.695914 | RORA      |
| rs2345963  | 1  | 162008708 | 0.1020 | 85.96% | 0.724400 | 1.000000 | 0.01946000 | 0.06748000 | ENST00000385701 | upstream   | 150823  | ---       | ---       |
| rs958485   | 15 | 42137357  | 0.0897 | 95.79% | 0.462300 | 1.000000 | 0.01946000 | 0.05373000 | NM_032892       | intron     | 0       | Hs.578544 | FRMD5     |
| rs10501724 | 11 | 89922809  | 0.2362 | 95.09% | 0.866200 | 1.000000 | 0.01952000 | 0.01441000 | NM_012124       | upstream   | 326982  | Hs.22857  | CHORDC1   |
| rs4474302  | 1  | 56040625  | 0.4535 | 94.39% | 0.109700 | 0.018450 | 0.01952000 | 0.03612000 | NM_207465       | downstream | 70245   | ---       | ---       |
| rs4131134  | 4  | 47349266  | 0.0896 | 97.89% | 0.470300 | 0.562100 | 0.01953000 | 0.02144000 | NM_006587       | intron     | 0       | Hs.518618 | CORIN     |
| rs26207    | 5  | 129063995 | 0.3346 | 91.23% | 0.406600 | 0.357500 | 0.01954000 | 0.01642000 | NM_133638       | intron     | 0       | Hs.23751  | ADAMTS19  |
| rs3751420  | 13 | 18600924  | 0.3399 | 97.54% | 0.184300 | 0.595000 | 0.01955000 | 0.04006000 | ENST00000343741 | downstream | 8635    | ---       | ---       |
| rs10519706 | 5  | 121884405 | 0.0954 | 91.93% | 0.714700 | 1.000000 | 0.01958000 | 0.02770000 | NM_005460       | downstream | 56712   | Hs.426463 | SNCAIP    |
| rs950230   | 6  | 44421400  | 0.2610 | 95.44% | 0.273100 | 0.716300 | 0.01958000 | 0.05721000 | NM_145026       | intron     | 0       | Hs.135283 | SPATS1    |
| rs10486788 | 7  | 15981866  | 0.3778 | 94.74% | 0.093610 | 0.093640 | 0.01960000 | 0.01384000 | ENST00000366332 | downstream | 113355  | ---       | ---       |
| rs10502380 | 18 | 8787022   | 0.0843 | 91.58% | 0.405800 | 0.404100 | 0.01960000 | 0.00760500 | NM_015210       | intron     | 0       | Hs.650822 | KIAA0802  |
| rs10491340 | 5  | 147370294 | 0.0616 | 76.84% | 0.000000 | 0.000563 | 0.01962000 | 0.12470000 | NM_006846       | upstream   | 53507   | Hs.331555 | SPINK5    |
| rs530055   | 12 | 68258648  | 0.1916 | 91.58% | 0.550700 | 1.000000 | 0.01964000 | 0.04148000 | NM_001042555    | downstream | 3637    | Hs.593446 | FRS2      |
| rs10483095 | 22 | 16511431  | 0.0238 | 81.05% | 0.114700 | 0.165800 | 0.01966000 | 0.99760000 | NM_015367       | intron     | 0       | Hs.699302 | BCL2L13   |
| rs10517249 | 4  | 32017986  | 0.2581 | 97.19% | 0.875500 | 0.830100 | 0.01966000 | 0.00538100 | NM_032457       | downstream | 1264417 | Hs.570785 | PCDH7     |
| rs10510536 | 3  | 23244774  | 0.0955 | 93.68% | 1.000000 | 1.000000 | 0.01967000 | 0.00157600 | NM_152653       | intron     | 0       | Hs.475688 | UBE2E2    |
| rs1460465  | 13 | 71361542  | 0.0776 | 97.19% | 1.000000 | 0.433500 | 0.01967000 | 0.12210000 | NM_004392       | upstream   | 22211   | Hs.129452 | DACH1     |
| rs2253977  | 20 | 3887140   | 0.3132 | 92.98% | 0.668500 | 1.000000 | 0.01968000 | 0.08555000 | NM_007219       | intron     | 0       | Hs.589884 | RNF24     |
| rs2527165  | 8  | 5521071   | 0.4493 | 76.14% | 0.013360 | 0.241100 | 0.01968000 | 0.08441000 | ENST00000363751 | downstream | 234775  | ---       | ---       |
| rs901558   | 11 | 11381343  | 0.1191 | 97.19% | 0.246600 | 0.368900 | 0.01968000 | 0.05971000 | NM_198516       | intron     | 0       | Hs.655152 | GALNTL4   |
| rs2288760  | 2  | 157135568 | 0.3546 | 88.07% | 0.000856 | 0.043890 | 0.01971000 | 0.02770000 | NM_000408       | intron     | 0       | Hs.512382 | GPD2      |
| rs10514631 | 2  | 19767453  | 0.1679 | 91.93% | 0.266600 | 0.469300 | 0.01972000 | 0.05247000 | NM_145260       | upstream   | 345558  | Hs.123933 | OSR1      |
| rs6735064  | 2  | 14372951  | 0.1611 | 94.74% | 0.499600 | 1.000000 | 0.01972000 | 0.02585000 | NM_145175       | upstream   | 317310  | Hs.260855 | FAM84A    |
| rs9284975  | 5  | 167313056 | 0.1481 | 91.23% | 0.466900 | 1.000000 | 0.01972000 | 0.02324000 | ENST00000388904 | intron     | 0       | ---       | ---       |
| rs10496244 | 2  | 80940121  | 0.4464 | 88.42% | 0.310000 | 0.258000 | 0.01973000 | 0.01320000 | NM_004389       | downstream | 211613  | Hs.167368 | CTNNA2    |
| rs2387174  | 5  | 9882373   | 0.1399 | 94.04% | 1.000000 | 1.000000 | 0.01973000 | 0.07651000 | ENST00000362925 | downstream | 68255   | ---       | ---       |
| rs6855439  | 4  | 37535285  | 0.1397 | 86.67% | 0.032980 | 0.158200 | 0.01973000 | 0.08299000 | NM_018290       | intron     | 0       | Hs.23363  | PGM2      |
| rs9294087  | 6  | 78581437  | 0.1777 | 95.79% | 1.000000 | 0.545800 | 0.01973000 | 0.00619500 | NM_001010844    | upstream   | 1052471 | Hs.656212 | IRAK1BP1  |
| rs2215232  | 4  | 11203210  | 0.4623 | 88.42% | 0.447500 | 0.748600 | 0.01975000 | 0.06422000 | NM_005114       | upstream   | 162723  | Hs.507348 | HS3ST1    |
| rs10489575 | 1  | 231300770 | 0.0830 | 92.98% | 0.696000 | 1.000000 | 0.01977000 | 0.04762000 | ENST00000366625 | intron     | 0       | ---       | ---       |
| rs1171576  | 1  | 154780180 | 0.2161 | 82.81% | 0.443600 | 1.000000 | 0.01979000 | 0.07402000 | NM_178229       | intron     | 0       | Hs.591495 | IQGAP3    |
| rs398      | 5  | 9667053   | 0.0406 | 95.09% | 1.000000 | 1.000000 | 0.01979000 | 0.04435000 | NM_019599       | downstream | 15062   | Hs.567492 | TAS2R1    |
| rs10493013 | 1  | 22575622  | 0.1593 | 87.02% | 1.000000 | 0.311700 | 0.01981000 | 0.03500000 | NM_014870       | upstream   | 75315   | Hs.418966 | ZBTB40    |
| rs10494963 | 1  | 212029177 | 0.0111 | 95.09% | 1.000000 | 1.000000 | 0.01982000 | 0.05198000 | ENST00000362373 | downstream | 152499  | ---       | ---       |
| rs10509693 | 10 | 97135219  | 0.0111 | 95.09% | 1.000000 | 1.000000 | 0.01982000 | 0.04311000 | NM_001034957    | intron     | 0       | Hs.696027 | SORBS1    |
| rs10518612 | 1  | 80209336  | 0.0111 | 95.09% | 0.027570 | 1.000000 | 0.01982000 | 0.99820000 | ENST00000294631 | upstream   | 964386  | ---       | ---       |
| rs7992455  | 13 | 45309508  | 0.0111 | 95.09% | 1.000000 | 1.000000 | 0.01982000 | 0.03745000 | NM_015070       | downstream | 124807  | Hs.136102 | ZC3H13    |
| rs10501919 | 11 | 98987681  | 0.2111 | 94.74% | 0.466200 | 1.000000 | 0.01983000 | 0.00561600 | NM_175566       | upstream   | 207792  | Hs.656783 | CNTN5     |
| rs10493605 | 1  | 77642912  | 0.1191 | 97.19% | 0.562700 | 0.366400 | 0.01985000 | 0.03029000 | NM_012093       | intron     | 0       | Hs.559718 | AK5       |
| rs388491   | 6  | 94994319  | 0.4239 | 96.84% | 0.391000 | 0.269900 | 0.01985000 | 0.07566000 | ENST00000386414 | downstream | 219243  | ---       | ---       |
| rs632480   | 9  | 102839173 | 0.3585 | 95.44% | 0.792500 | 0.634600 | 0.01988000 | 0.00457900 | NM_207299       | intron     | 0       | Hs.382683 | RP11-35N6 |
| rs2141531  | 7  | 9219938   | 0.2318 | 96.14% | 0.401300 | 0.442200 | 0.01989000 | 0.01703000 | NM_152745       | downstream | 462014  | Hs.487564 | NXP1      |
| rs10514979 | 5  | 64643370  | 0.0812 | 95.09% | 0.398100 | 0.692700 | 0.01991000 | 0.07701000 | NM_197941       | intron     | 0       | Hs.482291 | ADAMTS6   |
| rs202116   | 5  | 64101033  | 0.2012 | 89.82% | 0.845500 | 1.000000 | 0.01991000 | 0.02097000 | NM_005869       | intron     | 0       | Hs.371372 | SDCCAG10  |
| rs6732490  | 2  | 67714314  | 0.2824 | 91.93% | 0.446900 | 0.594400 | 0.01991000 | 0.01230000 | NM_019002       | downstream | 223136  | Hs.353022 | ETAA1     |
| rs7216226  | 17 | 10875893  | 0.0812 | 95.09% | 0.398100 | 0.393400 | 0.01991000 | 0.05218000 | ENST00000386899 | upstream   | 125604  | ---       | ---       |
| rs1790821  | 18 | 70079851  | 0.1979 | 82.46% | 0.003164 | 0.016230 | 0.01992000 | 0.20590000 | NM_001914       | intron     | 0       | Hs.465413 | CYB5A     |
| rs2823538  | 21 | 16293721  | 0.2591 | 96.84% | 0.639200 | 0.669000 | 0.01992000 | 0.13680000 | NM_013396       | downstream | 119473  | Hs.473370 | USP25     |
| rs2929660  | 15 | 36852716  | 0.2256 | 97.19% | 0.863400 | 0.693200 | 0.01992000 | 0.10410000 | NM_207444       | downstream | 73185   | Hs.448785 | C15orf53  |
| rs10486800 | 7  | 39619950  | 0.0556 | 97.89% | 0.042600 | 0.050850 | 0.01995000 | 0.06296000 | NM_005402       | upstream   | 9737    | Hs.6906   | RALA      |
| rs1586681  | 9  | 86837254  | 0.0556 | 97.89% | 0.586000 | 1.000000 | 0.01995000 | 0.10050000 | NM_001018066    | downstream | 154621  | Hs.494312 | NTRK2     |
| rs2032202  | 21 | 20598799  | 0.4346 | 91.23% | 0.209800 | 0.112600 | 0.01995000 | 0.02227000 | ENST00000387009 | downstream | 51132   | ---       | ---       |
| rs704407   | 3  | 64220305  | 0.2240 | 97.89% | 0.086170 | 0.014550 | 0.01995000 | 0.01374000 | NM_198859       | upstream   | 34134   | Hs.699317 | PRICKLE2  |

|            |    |           |        |        |          |          |            |            |                 |            |         |           |          |
|------------|----|-----------|--------|--------|----------|----------|------------|------------|-----------------|------------|---------|-----------|----------|
| rs10488674 | 11 | 2956971   | 0.1863 | 95.09% | 0.315300 | 0.392500 | 0.01996000 | 0.12410000 | NM_005969       | intron     | 0       | Hs.501684 | NAP1L4   |
| rs10494032 | 1  | 106012636 | 0.4291 | 96.49% | 0.713800 | 0.874300 | 0.01996000 | 0.12840000 | ENST00000388703 | downstream | 1135093 | ---       | ---      |
| rs1321465  | 20 | 52465568  | 0.1863 | 95.09% | 0.840900 | 0.775900 | 0.01996000 | 0.09386000 | NM_018431       | upstream   | 60020   | Hs.656582 | DOK5     |
| rs1375272  | 4  | 190034255 | 0.1863 | 95.09% | 0.840900 | 0.775900 | 0.01996000 | 0.05088000 | ENST00000321235 | downstream | 136803  | ---       | ---      |
| rs1607452  | 2  | 4250757   | 0.0469 | 97.19% | 0.015830 | 0.007505 | 0.01996000 | 0.02724000 | ENST00000382050 | downstream | 521256  | ---       | ---      |
| rs1321601  | 6  | 153630201 | 0.1630 | 94.74% | 0.187000 | 1.000000 | 0.01997000 | 0.03987000 | ENST00000312401 | downstream | 14914   | ---       | ---      |
| rs7074141  | 10 | 67452748  | 0.1630 | 94.74% | 0.377500 | 1.000000 | 0.01997000 | 0.00693600 | NM_013266       | intron     | 0       | Hs.660362 | CTNNA3   |
| rs10518475 | 4  | 126770936 | 0.3540 | 96.14% | 0.792200 | 0.387400 | 0.01999000 | 0.00306100 | NM_024582       | downstream | 138563  | Hs.702217 | FAT4     |
| rs740676   | 16 | 7652417   | 0.4314 | 89.47% | 0.055890 | 0.271700 | 0.02001000 | 0.01397000 | NM_018723       | intron     | 0       | Hs.459842 | A2BP1    |
| rs10504782 | 8  | 84319188  | 0.1264 | 94.39% | 0.401300 | 1.000000 | 0.02002000 | 0.00688300 | NM_173848       | upstream   | 1284924 | Hs.121663 | RALYL    |
| rs1387774  | 3  | 177892983 | 0.2647 | 89.47% | 0.422600 | 0.515800 | 0.02002000 | 0.17530000 | ENST00000359552 | downstream | 33357   | ---       | ---      |
| rs10484322 | 6  | 6210193   | 0.1241 | 94.74% | 1.000000 | 1.000000 | 0.02003000 | 0.01523000 | NM_000129       | intron     | 0       | Hs.335513 | F13A1    |
| rs6580266  | 5  | 142415941 | 0.4564 | 96.49% | 0.903300 | 0.651900 | 0.02003000 | 0.01022000 | NM_015071       | intron     | 0       | Hs.654668 | ARHGAP26 |
| rs1039116  | 15 | 84618201  | 0.3007 | 96.84% | 0.775200 | 0.847700 | 0.02005000 | 0.05215000 | NM_152336       | intron     | 0       | Hs.679833 | AGBL1    |
| rs1191599  | 14 | 29173192  | 0.0523 | 90.53% | 0.512000 | 1.000000 | 0.02005000 | 0.01105000 | NM_002742       | intron     | 0       | Hs.508999 | PRKD1    |
| rs10496131 | 2  | 66156377  | 0.0951 | 94.04% | 0.275200 | 0.259900 | 0.02006000 | 0.06798000 | NM_002398       | upstream   | 359659  | Hs.526754 | MEIS1    |
| rs1375872  | 3  | 36214676  | 0.2996 | 97.19% | 0.390400 | 0.614400 | 0.02007000 | 0.04964000 | NM_003149       | upstream   | 182425  | Hs.56045  | STAC     |
| rs9299440  | 10 | 61740701  | 0.3429 | 91.58% | 0.075280 | 0.328300 | 0.02008000 | 0.01217000 | NM_020987       | intron     | 0       | Hs.499725 | ANK3     |
| rs10509743 | 10 | 102180396 | 0.1763 | 97.54% | 0.678800 | 0.357300 | 0.02010000 | 0.15370000 | NM_003393       | upstream   | 32392   | Hs.421281 | WNT8B    |
| rs10511605 | 9  | 15011481  | 0.2172 | 93.68% | 0.470700 | 0.452500 | 0.02010000 | 0.00500500 | NM_152574       | downstream | 150080  | Hs.563630 | C9orf52  |
| rs1363148  | 5  | 128910813 | 0.3453 | 97.54% | 1.000000 | 0.165400 | 0.02010000 | 0.01447000 | NM_133638       | intron     | 0       | Hs.23751  | ADAMTS19 |
| rs10501725 | 11 | 89966065  | 0.2291 | 96.49% | 0.864500 | 0.635000 | 0.02011000 | 0.02878000 | NM_012124       | upstream   | 370238  | Hs.22857  | CHORDC1  |
| rs4944267  | 11 | 80255476  | 0.2968 | 97.54% | 0.249900 | 0.498300 | 0.02011000 | 0.05388000 | ENST00000363276 | downstream | 338718  | ---       | ---      |
| rs10509812 | 10 | 107944383 | 0.1981 | 91.23% | 1.000000 | 0.663700 | 0.02012000 | 0.00817300 | NM_001013031    | downstream | 382586  | Hs.591915 | SORCS1   |
| rs2715694  | 3  | 110023833 | 0.1788 | 96.14% | 0.213900 | 0.494500 | 0.02012000 | 0.07949000 | NM_016388       | upstream   | 488     | Hs.138701 | TRAT1    |
| rs673702   | 1  | 49342221  | 0.3488 | 90.53% | 0.493700 | 0.857800 | 0.02012000 | 0.07772000 | ENST00000334103 | intron     | 0       | ---       | ---      |
| rs10506337 | 12 | 53692096  | 0.1605 | 95.09% | 0.366400 | 0.742200 | 0.02013000 | 0.07131000 | NM_021191       | upstream   | 7793    | Hs.591024 | NEUROD4  |
| rs1271582  | 14 | 64634456  | 0.2481 | 94.04% | 0.100100 | 0.092800 | 0.02013000 | 0.00369100 | NM_197957       | intron     | 0       | Hs.285354 | MAX      |
| rs290641   | 15 | 93485231  | 0.4961 | 90.88% | 0.619000 | 0.540900 | 0.02013000 | 0.23880000 | ENST00000313753 | downstream | 285240  | ---       | ---      |
| rs2206333  | 6  | 23627693  | 0.2590 | 97.54% | 0.876800 | 0.400000 | 0.02014000 | 0.04627000 | ENST00000330282 | upstream   | 335168  | ---       | ---      |
| rs10502429 | 18 | 18759278  | 0.0941 | 95.09% | 0.271800 | 0.256700 | 0.02015000 | 0.01773000 | NM_203292       | upstream   | 8015    | Hs.546282 | RBBP8    |
| rs2049638  | 2  | 34808299  | 0.3278 | 94.74% | 0.168700 | 0.256600 | 0.02015000 | 0.08101000 | ENST00000384525 | upstream   | 741876  | ---       | ---      |
| rs10493169 | 1  | 52876626  | 0.0111 | 94.74% | 1.000000 | 1.000000 | 0.02016000 | 0.27150000 | ENST00000343491 | intron     | 0       | ---       | ---      |
| rs10508631 | 10 | 20952980  | 0.0872 | 90.53% | 0.031100 | 0.030560 | 0.02016000 | 0.05170000 | NM_213569       | downstream | 159861  | Hs.5025   | NEBL     |
| rs10513820 | 3  | 189015786 | 0.0111 | 94.74% | 1.000000 | 1.000000 | 0.02016000 | 0.99840000 | NM_138931       | upstream   | 69617   | Hs.478588 | BCL6     |
| rs1980078  | 3  | 125974349 | 0.3016 | 90.18% | 0.001860 | 0.002991 | 0.02017000 | 0.02450000 | NM_002213       | intron     | 0       | Hs.536663 | ITGB5    |
| rs514778   | 6  | 12701446  | 0.2059 | 89.47% | 0.341700 | 0.788700 | 0.02017000 | 0.01633000 | NM_030948       | upstream   | 125517  | Hs.436996 | PHACTR1  |
| rs2024265  | 7  | 156450380 | 0.1692 | 93.33% | 0.515400 | 0.631300 | 0.02018000 | 0.02342000 | NM_138400       | intron     | 0       | Hs.15825  | NOM1     |
| rs10485447 | 20 | 51423786  | 0.2435 | 95.09% | 0.325200 | 0.851600 | 0.02020000 | 0.04520000 | NM_173485       | intron     | 0       | Hs.473117 | TSHZ2    |
| rs10519231 | 15 | 77273165  | 0.2199 | 93.33% | 0.594000 | 0.804000 | 0.02023000 | 0.26700000 | NM_153815       | upstream   | 103004  | Hs.591111 | RASGRF1  |
| rs1595902  | 18 | 60646565  | 0.2119 | 94.39% | 0.147000 | 0.307000 | 0.02025000 | 0.02276000 | ENST00000363325 | upstream   | 278842  | ---       | ---      |
| rs2466030  | 8  | 128276320 | 0.2140 | 95.09% | 0.587800 | 1.000000 | 0.02027000 | 0.01393000 | ENST00000377972 | downstream | 435390  | ---       | ---      |
| rs10497720 | 2  | 192622531 | 0.2444 | 93.33% | 0.739800 | 0.848600 | 0.02029000 | 0.02141000 | NM_016192       | intron     | 0       | Hs.144513 | TMEFF2   |
| rs839022   | 4  | 57986522  | 0.4635 | 96.14% | 0.395700 | 0.643900 | 0.02029000 | 0.34480000 | NM_001553       | upstream   | 315214  | Hs.479808 | IGFBP7   |
| rs10513246 | 3  | 145946023 | 0.0201 | 95.79% | 1.000000 | 1.000000 | 0.02030000 | 0.12270000 | ENST00000355888 | downstream | 298647  | ---       | ---      |
| rs10511284 | 3  | 111511355 | 0.1925 | 83.86% | 0.000313 | 0.001984 | 0.02032000 | 0.08928000 | ENST00000388702 | downstream | 242053  | ---       | ---      |
| rs1564870  | 3  | 68070620  | 0.2434 | 93.68% | 0.045580 | 0.450500 | 0.02035000 | 0.33680000 | NM_213609       | upstream   | 67840   | Hs.655061 | FAM19A1  |
| rs198617   | 13 | 47817359  | 0.0409 | 77.19% | 0.303900 | 1.000000 | 0.02035000 | 0.07060000 | NM_000321       | intron     | 0       | Hs.408528 | RB1      |
| rs2469583  | 15 | 46146164  | 0.3956 | 87.37% | 1.000000 | 0.524400 | 0.02035000 | 0.01260000 | NM_205850       | upstream   | 54297   | Hs.699810 | SLC24A5  |
| rs7853963  | 9  | 82908731  | 0.1461 | 93.68% | 1.000000 | 0.421600 | 0.02035000 | 0.01314000 | NM_005077       | downstream | 479687  | Hs.197320 | TLE1     |
| rs10493475 | 1  | 70809473  | 0.0704 | 94.74% | 0.005504 | 0.365500 | 0.02036000 | 0.01442000 | NM_198719       | downstream | 399579  | Hs.445000 | PTGER3   |
| rs10516164 | 4  | 4547912   | 0.1201 | 97.89% | 1.000000 | 0.660000 | 0.02037000 | 0.03053000 | NM_016930       | intron     | 0       | Hs.584913 | STX18    |
| rs2029395  | 2  | 179388466 | 0.3889 | 94.74% | 0.010320 | 0.191500 | 0.02037000 | 0.03418000 | NM_133379       | upstream   | 8072    | Hs.654592 | TTN      |
| rs1423297  | 5  | 28803744  | 0.4365 | 91.23% | 0.706600 | 0.760800 | 0.02039000 | 0.08844000 | ENST00000387488 | downstream | 143115  | ---       | ---      |

|            |    |           |        |        |          |          |            |            |                 |            |         |           |          |
|------------|----|-----------|--------|--------|----------|----------|------------|------------|-----------------|------------|---------|-----------|----------|
| rs6427242  | 1  | 168554781 | 0.3222 | 94.74% | 0.095860 | 1.000000 | 0.02040000 | 0.03217000 | NM_152281       | upstream   | 213113  | Hs.183702 | SCYL1BP1 |
| rs10520958 | 5  | 30200233  | 0.2047 | 96.84% | 0.098630 | 0.793500 | 0.02042000 | 0.04719000 | ENST00000365278 | downstream | 215217  | ---       | ---      |
| rs1458869  | 2  | 71364521  | 0.0846 | 93.33% | 0.232600 | 1.000000 | 0.02042000 | 0.02736000 | NM_001014972    | upstream   | 47876   | Hs.434401 | ZNF638   |
| rs10516049 | 5  | 168097247 | 0.0620 | 90.53% | 0.248800 | 0.284200 | 0.02045000 | 0.08547000 | NM_003062       | intron     | 0       | Hs.604116 | SLIT3    |
| rs10261711 | 7  | 92232227  | 0.0207 | 93.33% | 0.100100 | 1.000000 | 0.02048000 | 0.02157000 | NM_152745       | downstream | 465303  | Hs.487564 | NXPPI1   |
| rs10484093 | 14 | 85767631  | 0.2284 | 97.54% | 0.234800 | 0.340700 | 0.02048000 | 0.38050000 | NM_013231       | downstream | 603609  | Hs.533710 | FLRT2    |
| rs2629812  | 1  | 114454559 | 0.4004 | 86.32% | 0.000892 | 0.010310 | 0.02048000 | 0.27050000 | NM_205848       | intron     | 0       | Hs.370963 | SYT6     |
| rs10521232 | 17 | 13480529  | 0.2122 | 95.09% | 0.719300 | 0.837900 | 0.02049000 | 0.06911000 | NM_006042       | upstream   | 34560   | Hs.462270 | HS3ST3A1 |
| rs359421   | 5  | 173258260 | 0.4615 | 95.79% | 0.225900 | 0.069140 | 0.02049000 | 0.00452500 | NM_030627       | intron     | 0       | Hs.127126 | CPEB4    |
| rs10494638 | 1  | 188850238 | 0.1218 | 96.49% | 1.000000 | 0.374800 | 0.02053000 | 0.01777000 | NM_199051       | upstream   | 136856  | Hs.65765  | FAM5C    |
| rs10500696 | 11 | 7332490   | 0.0967 | 94.39% | 0.722800 | 0.233500 | 0.02053000 | 0.02451000 | NM_175733       | intron     | 0       | Hs.177193 | SYT9     |
| rs1443402  | 5  | 17957829  | 0.4247 | 97.89% | 0.327900 | 0.156200 | 0.02056000 | 0.02248000 | ENST00000332101 | upstream   | 269433  | ---       | ---      |
| rs1462935  | 1  | 60379766  | 0.1712 | 90.18% | 0.378000 | 0.327500 | 0.02056000 | 0.05472000 | NM_152377       | upstream   | 67736   | Hs.47385  | C1orf87  |
| rs516224   | 4  | 74969011  | 0.4247 | 97.89% | 0.713400 | 0.347200 | 0.02056000 | 0.03600000 | NM_001511       | downstream | 762     | Hs.789    | CXCL1    |
| rs1895370  | 16 | 25202852  | 0.2656 | 95.79% | 0.538000 | 0.717400 | 0.02057000 | 0.02427000 | NM_001012981    | upstream   | 26509   | Hs.513451 | ZKSCAN2  |
| rs368248   | 2  | 40340545  | 0.2816 | 85.96% | 0.636200 | 0.529800 | 0.02057000 | 0.06873000 | NM_021097       | intron     | 0       | Hs.468274 | SLC8A1   |
| rs8123670  | 20 | 22408864  | 0.1283 | 94.39% | 0.783300 | 0.565800 | 0.02058000 | 0.03575000 | NM_153675       | downstream | 100959  | Hs.155651 | FOXA2    |
| rs11477    | 5  | 138775359 | 0.3014 | 97.19% | 0.257200 | 0.128600 | 0.02059000 | 0.11860000 | NM_152686       | 3UTR       | 0       | Hs.483537 | DNAJC18  |
| rs2488264  | 10 | 29609361  | 0.2353 | 95.44% | 0.502200 | 0.846700 | 0.02059000 | 0.04248000 | NM_032517       | upstream   | 8635    | Hs.558572 | LYZL1    |
| rs2281236  | 16 | 1543577   | 0.4583 | 96.84% | 0.628800 | 0.441200 | 0.02061000 | 0.12270000 | NM_024600       | intron     | 0       | Hs.459652 | TMEM204  |
| rs4977824  | 9  | 23111911  | 0.1566 | 87.37% | 0.087730 | 0.067650 | 0.02062000 | 0.09871000 | NM_004432       | downstream | 570073  | Hs.166109 | ELAVL2   |
| rs899361   | 13 | 80698342  | 0.3735 | 88.77% | 0.031630 | 0.015910 | 0.02062000 | 0.00294000 | ENST00000387380 | upstream   | 39541   | ---       | ---      |
| rs1910651  | 21 | 24343223  | 0.3277 | 93.68% | 0.094720 | 0.028530 | 0.02063000 | 0.14630000 | ENST00000355181 | upstream   | 439918  | ---       | ---      |
| rs1371422  | 2  | 35626263  | 0.3569 | 96.84% | 0.358100 | 0.269700 | 0.02064000 | 0.02243000 | NM_016441       | upstream   | 810310  | Hs.699247 | CRIM1    |
| rs381627   | 2  | 40341098  | 0.2463 | 94.04% | 0.137200 | 1.000000 | 0.02064000 | 0.06458000 | NM_021097       | intron     | 0       | Hs.468274 | SLC8A1   |
| rs805935   | 20 | 37690703  | 0.3441 | 92.28% | 0.132100 | 1.000000 | 0.02064000 | 0.12350000 | NM_005461       | downstream | 1057199 | Hs.702085 | MAFB     |
| rs1914154  | 10 | 37347820  | 0.4982 | 96.84% | 0.400900 | 0.131100 | 0.02068000 | 0.05090000 | NM_052997       | upstream   | 106971  | Hs.373787 | ANKRD30A |
| rs10509692 | 10 | 97226588  | 0.4045 | 93.68% | 1.000000 | 0.745200 | 0.02069000 | 0.03346000 | NM_001034957    | intron     | 0       | Hs.696027 | SORBS1   |
| rs2388956  | 1  | 80256594  | 0.0197 | 97.89% | 0.095580 | 1.000000 | 0.02070000 | 0.10310000 | ENST00000370739 | upstream   | 1011644 | ---       | ---      |
| rs4438374  | 18 | 34747509  | 0.0696 | 80.70% | 0.082090 | 0.277100 | 0.02071000 | 0.03829000 | NM_020180       | upstream   | 1347568 | Hs.435976 | BRUNOL4  |
| rs641117   | 7  | 51792039  | 0.1496 | 92.63% | 0.811100 | 0.720700 | 0.02072000 | 0.00448000 | ENST00000388001 | downstream | 39919   | ---       | ---      |
| rs1430024  | 2  | 37967500  | 0.1673 | 94.39% | 0.185700 | 0.205800 | 0.02073000 | 0.02363000 | NM_144713       | upstream   | 63610   | Hs.591566 | FAM82A   |
| rs2710299  | 12 | 11960247  | 0.1538 | 91.23% | 0.228500 | 0.797700 | 0.02074000 | 0.04821000 | NM_001987       | downstream | 20659   | Hs.504765 | ETV6     |
| rs9301833  | 13 | 92178407  | 0.1588 | 96.14% | 0.363200 | 0.619700 | 0.02074000 | 0.00928800 | NM_004466       | intron     | 0       | Hs.655675 | GPC5     |
| rs10484689 | 6  | 147967443 | 0.4301 | 97.89% | 0.020940 | 0.134300 | 0.02076000 | 0.10440000 | NM_001030060    | downstream | 34593   | Hs.567973 | SAMD5    |
| rs10509054 | 10 | 58085702  | 0.0578 | 97.19% | 0.223300 | 0.256100 | 0.02076000 | 0.06137000 | NM_001005413    | upstream   | 294669  | Hs.591363 | ZWINT    |
| rs10502755 | 18 | 37055020  | 0.0881 | 91.58% | 1.000000 | 1.000000 | 0.02077000 | 0.04951000 | NM_002647       | upstream   | 734177  | Hs.464971 | PIK3C3   |
| rs2157998  | 7  | 91158790  | 0.2780 | 78.25% | 0.616200 | 0.364400 | 0.02080000 | 0.02296000 | NM_006980       | downstream | 181167  | Hs.532216 | MTERF    |
| rs2367901  | 3  | 63566968  | 0.3303 | 95.09% | 0.218700 | 0.331400 | 0.02080000 | 0.07047000 | NM_144642       | intron     | 0       | Hs.648668 | SYNPR    |
| rs7669414  | 4  | 36230220  | 0.1259 | 94.74% | 0.159200 | 0.235200 | 0.02080000 | 0.03654000 | ENST00000357504 | downstream | 208409  | ---       | ---      |
| rs6461667  | 7  | 22763268  | 0.2032 | 97.54% | 0.578800 | 0.793000 | 0.02081000 | 0.17170000 | ENST00000387559 | downstream | 8255    | ---       | ---      |
| rs10489042 | 4  | 17490583  | 0.0208 | 92.63% | 1.000000 | 1.000000 | 0.02083000 | 0.01752000 | NM_153686       | intron     | 0       | Hs.446201 | LCORL    |
| rs304073   | 3  | 4511386   | 0.4673 | 91.23% | 0.618300 | 0.875800 | 0.02083000 | 0.12890000 | NM_002222       | intron     | 0       | Hs.699169 | ITPR1    |
| rs1502702  | 9  | 90639864  | 0.1380 | 97.89% | 1.000000 | 0.462800 | 0.02084000 | 0.02676000 | NM_001001938    | upstream   | 155799  | Hs.585118 | C9orf47  |
| rs1463074  | 11 | 41584071  | 0.3040 | 97.54% | 1.000000 | 1.000000 | 0.02085000 | 0.01557000 | NM_006595       | upstream   | 1706038 | Hs.435771 | API5     |
| rs4703156  | 5  | 100935754 | 0.4506 | 88.77% | 0.703600 | 1.000000 | 0.02087000 | 0.00140600 | ENST00000388691 | upstream   | 9679    | ---       | ---      |
| rs2640504  | 1  | 110975409 | 0.0375 | 56.14% | 0.013830 | 0.028110 | 0.02089000 | 0.99770000 | ENST00000369770 | intron     | 0       | ---       | ---      |
| rs949731   | 3  | 7327379   | 0.2807 | 85.61% | 0.010810 | 0.028910 | 0.02091000 | 0.01190000 | NM_181875       | intron     | 0       | ---       | GRM7     |
| rs998038   | 6  | 157397855 | 0.1612 | 85.96% | 0.154800 | 0.070200 | 0.02094000 | 0.05789000 | NM_175863       | intron     | 0       | Hs.291587 | ARID1B   |
| rs10497527 | 2  | 179406841 | 0.1509 | 92.98% | 1.000000 | 0.728300 | 0.02095000 | 0.19730000 | ENST00000295723 | 3UTR       | 0       | ---       | ---      |
| rs4752977  | 11 | 47257005  | 0.2344 | 95.79% | 0.027000 | 0.080610 | 0.02095000 | 0.04253000 | NM_130476       | intron     | 0       | Hs.82548  | MADD     |
| rs10504946 | 8  | 96370251  | 0.1483 | 82.81% | 0.000007 | 0.010050 | 0.02097000 | 0.10750000 | NM_177965       | upstream   | 19657   | Hs.548157 | C8orf37  |
| rs1213257  | 11 | 84898421  | 0.3029 | 97.89% | 0.121100 | 0.703300 | 0.02099000 | 0.16440000 | ENST00000383856 | upstream   | 209     | ---       | ---      |
| rs1480039  | 12 | 26313915  | 0.2500 | 77.89% | 0.001974 | 0.044430 | 0.02099000 | 0.14990000 | NM_005086       | downstream | 36781   | Hs.183428 | SSPN     |

|            |    |           |        |        |          |          |            |            |                 |            |        |           |          |
|------------|----|-----------|--------|--------|----------|----------|------------|------------|-----------------|------------|--------|-----------|----------|
| rs1359379  | 10 | 9163312   | 0.4260 | 87.72% | 0.001855 | 0.003280 | 0.02100000 | 0.01139000 | NM_016195       | downstream | 108632 | Hs.240    | MPHOSPH1 |
| rs1887291  | 14 | 87624362  | 0.1412 | 89.47% | 1.000000 | 0.788100 | 0.02100000 | 0.03728000 | NM_003608       | downstream | 76198  | Hs.513440 | GPR65    |
| rs10492645 | 13 | 105818339 | 0.0119 | 88.77% | 1.000000 | 1.000000 | 0.02105000 | 0.08382000 | ENST00000310792 | upstream   | 57783  | ---       | ---      |
| rs774861   | 3  | 113167556 | 0.0913 | 88.42% | 0.001705 | 0.003327 | 0.02105000 | 0.24690000 | NM_145753       | intron     | 0      | Hs.477114 | PHLDB2   |
| rs2052003  | 17 | 12527057  | 0.4089 | 94.39% | 0.450500 | 0.747700 | 0.02106000 | 0.07249000 | NM_153604       | intron     | 0      | Hs.567641 | MYOCD    |
| rs9321060  | 6  | 126491345 | 0.2807 | 94.39% | 0.879800 | 0.860000 | 0.02106000 | 0.01116000 | NM_001031712    | downstream | 89234  | Hs.404186 | TRMT11   |
| rs10490792 | 3  | 64251892  | 0.1043 | 97.54% | 0.516400 | 0.092540 | 0.02107000 | 0.07985000 | NM_198859       | upstream   | 65721  | Hs.699317 | PRICKLE2 |
| rs1115508  | 11 | 65679725  | 0.4982 | 97.19% | 0.008056 | 0.034330 | 0.02109000 | 0.06916000 | NM_018026       | intron     | 0      | Hs.644326 | PACS1    |
| rs763406   | 20 | 16952565  | 0.1385 | 97.54% | 0.319400 | 1.000000 | 0.02109000 | 0.07095000 | ENST00000387043 | upstream   | 40887  | ---       | ---      |
| rs10496012 | 2  | 53117375  | 0.0593 | 94.74% | 1.000000 | 1.000000 | 0.02110000 | 0.00368800 | ENST00000384021 | downstream | 433714 | ---       | ---      |
| rs932877   | 10 | 17440957  | 0.3605 | 96.84% | 0.067560 | 0.169100 | 0.02110000 | 0.07319000 | NM_001004470    | intron     | 0      | Hs.677766 | ST8SIA6  |
| rs10499204 | 6  | 139258119 | 0.0354 | 89.12% | 1.000000 | 1.000000 | 0.02112000 | 0.02313000 | NM_031922       | downstream | 9195   | Hs.334603 | REPS1    |
| rs10519734 | 5  | 123219082 | 0.1515 | 92.63% | 1.000000 | 1.000000 | 0.02112000 | 0.03484000 | NM_020747       | downstream | 781427 | Hs.266616 | ZNF608   |
| rs2561445  | 2  | 107405193 | 0.2347 | 97.19% | 0.866900 | 1.000000 | 0.02112000 | 0.08261000 | NM_032528       | upstream   | 536151 | Hs.98265  | ST6GAL2  |
| rs712530   | 3  | 114498646 | 0.2302 | 97.54% | 1.000000 | 0.845800 | 0.02112000 | 0.01075000 | ENST00000308346 | intron     | 0      | ---       | ---      |
| rs1673997  | 5  | 87070011  | 0.4586 | 97.54% | 0.547000 | 0.286200 | 0.02114000 | 0.02506000 | NM_153354       | downstream | 456770 | Hs.379972 | TMEM161B |
| rs2086200  | 13 | 80698798  | 0.4182 | 94.39% | 0.706900 | 0.362500 | 0.02114000 | 0.00750500 | ENST00000387380 | upstream   | 39085  | ---       | ---      |
| rs10496201 | 2  | 76196768  | 0.1097 | 94.39% | 0.026030 | 0.116000 | 0.02115000 | 0.06823000 | NM_003203       | upstream   | 404938 | Hs.303808 | C2orf3   |
| rs10500757 | 11 | 12399173  | 0.4819 | 96.84% | 0.003926 | 0.051080 | 0.02115000 | 0.05611000 | NM_018222       | intron     | 0      | Hs.607144 | PARVA    |
| rs10518132 | 4  | 75985251  | 0.0599 | 93.68% | 0.236200 | 1.000000 | 0.02115000 | 0.00903600 | NM_001729       | upstream   | 46540  | Hs.591704 | BTC      |
| rs1284226  | 11 | 93246069  | 0.0573 | 97.89% | 1.000000 | 1.000000 | 0.02117000 | 0.09229000 | ENST00000384184 | downstream | 45523  | ---       | ---      |
| rs9313473  | 5  | 169152577 | 0.1306 | 94.04% | 0.276800 | 0.223300 | 0.02118000 | 0.00678500 | NM_004946       | intron     | 0      | Hs.586174 | DOCK2    |
| rs1037254  | 13 | 38218761  | 0.3352 | 94.74% | 0.339100 | 0.146000 | 0.02119000 | 0.00818100 | NM_207361       | intron     | 0      | Hs.253994 | FREM2    |
| rs262036   | 5  | 177955387 | 0.2043 | 97.89% | 0.202000 | 0.094880 | 0.02120000 | 0.03267000 | NM_173465       | upstream   | 5583   | Hs.660026 | COL23A1  |
| rs9323852  | 14 | 90165038  | 0.4632 | 90.53% | 0.103600 | 0.057150 | 0.02122000 | 0.03850000 | NM_001010854    | intron     | 0      | Hs.655697 | TTC7B    |
| rs10511182 | 3  | 102255525 | 0.0665 | 97.54% | 0.023700 | 0.049020 | 0.02124000 | 0.02020000 | NM_015429       | upstream   | 60586  | Hs.477015 | ABI3BP   |
| rs2792695  | 10 | 113820301 | 0.1047 | 97.19% | 0.750000 | 0.743800 | 0.02126000 | 0.01915000 | NM_020918       | downstream | 79313  | Hs.42586  | GPAM     |
| rs6850284  | 4  | 42441381  | 0.1047 | 97.19% | 1.000000 | 1.000000 | 0.02126000 | 0.05385000 | NM_006095       | upstream   | 87722  | Hs.435052 | ATP8A1   |
| rs9316935  | 13 | 56918224  | 0.4588 | 97.89% | 0.548300 | 0.168600 | 0.02130000 | 0.02318000 | NM_001040429    | upstream   | 186432 | Hs.106511 | PCDH17   |
| rs1197310  | 3  | 134610914 | 0.4730 | 97.54% | 0.016420 | 0.048290 | 0.02131000 | 0.00033500 | NM_003571       | intron     | 0      | Hs.659862 | BFP2     |
| rs9325885  | 8  | 13210138  | 0.4523 | 91.93% | 0.535400 | 0.638200 | 0.02131000 | 0.00939300 | NM_024767       | intron     | 0      | Hs.134296 | DLC1     |
| rs10514033 | 18 | 67862234  | 0.0466 | 97.89% | 0.457000 | 1.000000 | 0.02134000 | 0.12230000 | NM_182511       | downstream | 492661 | Hs.569851 | CBLN2    |
| rs3775567  | 4  | 185598236 | 0.0766 | 87.02% | 0.007978 | 0.007897 | 0.02134000 | 0.17330000 | NM_002199       | intron     | 0      | Hs.654566 | IRF2     |
| rs7667905  | 4  | 109506094 | 0.2025 | 97.89% | 0.136400 | 0.060620 | 0.02134000 | 0.04176000 | NM_016269       | upstream   | 197067 | Hs.555947 | LEF1     |
| rs10510981 | 3  | 69685275  | 0.1630 | 95.79% | 0.006112 | 0.011850 | 0.02136000 | 0.13480000 | NM_198178       | upstream   | 210377 | Hs.166017 | MITF     |
| rs1074463  | 5  | 22671126  | 0.3566 | 97.89% | 0.241600 | 0.124200 | 0.02137000 | 0.05489000 | NM_004061       | intron     | 0      | Hs.113684 | CDH12    |
| rs10515455 | 5  | 130906688 | 0.3229 | 95.09% | 0.070270 | 0.194800 | 0.02138000 | 0.01181000 | NM_016340       | intron     | 0      | Hs.483329 | RAPGEF6  |
| rs2207651  | 10 | 83554440  | 0.4315 | 87.02% | 0.071390 | 0.513900 | 0.02138000 | 0.00664600 | NM_001010848    | upstream   | 70637  | Hs.125119 | NRG3     |
| rs33422    | 5  | 71915951  | 0.2472 | 95.09% | 0.416800 | 0.454300 | 0.02138000 | 0.00656700 | NM_152625       | upstream   | 76949  | Hs.370303 | ZNF366   |
| rs6013989  | 20 | 52416192  | 0.0803 | 96.14% | 1.000000 | 1.000000 | 0.02139000 | 0.13320000 | NM_018431       | upstream   | 109396 | Hs.656582 | DOK5     |
| rs10506319 | 12 | 52505344  | 0.3058 | 97.54% | 0.397900 | 0.868300 | 0.02140000 | 0.01104000 | NM_020898       | upstream   | 97858  | Hs.156667 | CALCOCO1 |
| rs10492405 | 13 | 32659455  | 0.0632 | 91.58% | 0.070510 | 0.083910 | 0.02142000 | 0.02062000 | NM_052851       | intron     | 0      | Hs.507704 | STARD13  |
| rs718980   | 15 | 23325412  | 0.1606 | 96.14% | 0.075710 | 0.046430 | 0.02143000 | 0.14540000 | NM_130839       | upstream   | 90191  | Hs.654383 | UBE3A    |
| rs10499203 | 6  | 139257322 | 0.0332 | 95.09% | 1.000000 | 1.000000 | 0.02144000 | 0.02205000 | NM_031922       | downstream | 9992   | Hs.334603 | REPS1    |
| rs10500928 | 11 | 22434893  | 0.2320 | 97.54% | 0.501300 | 0.482900 | 0.02144000 | 0.04085000 | NM_020346       | downstream | 77274  | Hs.242821 | SLC17A6  |
| rs1491192  | 10 | 133792769 | 0.2320 | 97.54% | 0.128400 | 0.061700 | 0.02144000 | 0.05017000 | NM_194303       | intron     | 0      | ---       | C10orf39 |
| rs6502302  | 17 | 13672493  | 0.0332 | 95.09% | 1.000000 | 1.000000 | 0.02144000 | 0.03941000 | NM_006042       | upstream   | 226524 | Hs.462270 | HS3ST3A1 |
| rs9302028  | 13 | 94394432  | 0.0336 | 94.04% | 1.000000 | 1.000000 | 0.02145000 | 0.01622000 | NM_005845       | downstream | 75658  | Hs.508423 | ABCC4    |
| rs766132   | 15 | 45368231  | 0.4213 | 93.68% | 0.616000 | 0.542000 | 0.02147000 | 0.00541300 | NM_024966       | upstream   | 471057 | Hs.511265 | SEMA6D   |
| rs1276535  | 6  | 112989635 | 0.3333 | 94.74% | 0.013970 | 0.105800 | 0.02148000 | 0.03901000 | ENST00000386079 | downstream | 84914  | ---       | ---      |
| rs4568840  | 1  | 220614011 | 0.4748 | 97.54% | 0.809800 | 0.881700 | 0.02149000 | 0.02116000 | ENST00000385440 | downstream | 24509  | ---       | ---      |
| rs4044903  | 12 | 63635187  | 0.1577 | 97.89% | 0.823100 | 0.803600 | 0.02150000 | 0.03385000 | NM_007191       | downstream | 95487  | Hs.284122 | WIF1     |
| rs10516683 | 4  | 84293850  | 0.2690 | 97.19% | 0.361200 | 0.405500 | 0.02151000 | 0.11640000 | NM_016619       | upstream   | 38915  | Hs.546392 | PLAC8    |
| rs10519816 | 15 | 31456613  | 0.1601 | 97.54% | 0.501600 | 0.631100 | 0.02151000 | 0.04732000 | NM_001036       | upstream   | 88612  | Hs.369250 | RYR3     |

|            |    |           |        |        |          |          |            |            |                 |            |        |           |           |
|------------|----|-----------|--------|--------|----------|----------|------------|------------|-----------------|------------|--------|-----------|-----------|
| rs7828725  | 8  | 94208094  | 0.3313 | 88.42% | 0.776000 | 1.000000 | 0.02153000 | 0.06689000 | ENST00000378861 | upstream   | 109017 | ---       | ---       |
| rs649841   | 11 | 81554687  | 0.3175 | 96.14% | 0.488900 | 0.321700 | 0.02154000 | 0.02265000 | ENST00000357859 | upstream   | 523562 | ---       | ---       |
| rs7591597  | 2  | 138508913 | 0.4946 | 96.84% | 1.000000 | 0.449100 | 0.02155000 | 0.07163000 | NM_001024075    | downstream | 53195  | Hs.42151  | HNMT      |
| rs10500801 | 11 | 13886095  | 0.2130 | 94.74% | 1.000000 | 0.607400 | 0.02156000 | 0.04918000 | NM_006108       | upstream   | 54719  | Hs.705394 | SPON1     |
| rs1425727  | 8  | 25642697  | 0.2363 | 89.82% | 0.602800 | 1.000000 | 0.02156000 | 0.06063000 | ENST00000380737 | intron     | 0      | ---       | ---       |
| rs4943136  | 13 | 33194632  | 0.3485 | 92.63% | 1.000000 | 1.000000 | 0.02156000 | 0.04735000 | NM_181558       | upstream   | 95571  | Hs.115474 | RFC3      |
| rs9290479  | 3  | 174993221 | 0.2699 | 96.84% | 0.543900 | 0.092330 | 0.02158000 | 0.03151000 | NM_014932       | intron     | 0      | Hs.478289 | NLGN1     |
| rs10491136 | 17 | 36376768  | 0.1077 | 96.14% | 1.000000 | 1.000000 | 0.02160000 | 0.19200000 | NM_213656       | upstream   | 98     | Hs.28467  | KRT39     |
| rs4099108  | 5  | 159910268 | 0.1429 | 95.79% | 0.459100 | 0.590000 | 0.02160000 | 0.02571000 | ENST00000385201 | downstream | 65233  | ---       | ---       |
| rs4685356  | 3  | 16599918  | 0.3510 | 85.96% | 0.001176 | 0.010160 | 0.02166000 | 0.08152000 | NM_001351       | downstream | 3389   | Hs.131179 | DAZL      |
| rs10510932 | 3  | 65122791  | 0.0150 | 93.33% | 1.000000 | 1.000000 | 0.02167000 | 0.04694000 | NM_001033057    | downstream | 194302 | Hs.651939 | MAGI1     |
| rs10492886 | 16 | 55168116  | 0.0618 | 93.68% | 0.608300 | 1.000000 | 0.02168000 | 0.03101000 | NM_032935       | downstream | 7771   | Hs.567624 | MT4       |
| rs2782327  | 10 | 19541172  | 0.0618 | 93.68% | 0.066640 | 0.268800 | 0.02168000 | 0.02227000 | ENST00000377266 | downstream | 2551   | ---       | ---       |
| rs10490131 | 2  | 169759413 | 0.1848 | 96.84% | 0.841400 | 1.000000 | 0.02170000 | 0.11250000 | NM_004525       | intron     | 0      | Hs.657729 | LRP2      |
| rs4128360  | 13 | 100361380 | 0.4964 | 97.89% | 0.403400 | 0.452900 | 0.02170000 | 0.00704100 | NM_052867       | downstream | 142749 | Hs.525146 | NALCN     |
| rs1519860  | 20 | 4871286   | 0.0789 | 97.89% | 0.682000 | 0.463500 | 0.02171000 | 0.00132000 | NM_203327       | intron     | 0      | Hs.516866 | SLC23A2   |
| rs172570   | 5  | 152699029 | 0.0789 | 97.89% | 0.682000 | 1.000000 | 0.02171000 | 0.02783000 | NM_000827       | upstream   | 151470 | Hs.519693 | GRIA1     |
| rs304863   | 5  | 152700181 | 0.0789 | 97.89% | 0.682000 | 1.000000 | 0.02171000 | 0.02783000 | NM_000827       | upstream   | 150318 | Hs.519693 | GRIA1     |
| rs9325452  | 10 | 82375021  | 0.0789 | 97.89% | 0.393100 | 1.000000 | 0.02171000 | 0.04792000 | NM_207372       | intron     | 0      | Hs.147643 | SH2D4B    |
| rs10483434 | 14 | 32759374  | 0.1302 | 84.91% | 0.040310 | 0.225800 | 0.02172000 | 0.09708000 | NM_173159       | intron     | 0      | Hs.659456 | NPAS3     |
| rs2172520  | 12 | 90994568  | 0.0635 | 91.23% | 0.608300 | 1.000000 | 0.02172000 | 0.00779800 | NM_001731       | downstream | 66462  | Hs.255935 | BTG1      |
| rs2906388  | 7  | 10049603  | 0.0154 | 91.23% | 1.000000 | 1.000000 | 0.02172000 | 0.06398000 | ENST00000387411 | upstream   | 179346 | ---       | ---       |
| rs613623   | 1  | 238012069 | 0.2345 | 96.49% | 0.128700 | 0.238600 | 0.02173000 | 0.08068000 | NM_000740       | intron     | 0      | Hs.7138   | CHRM3     |
| rs9294602  | 6  | 95202609  | 0.0759 | 78.60% | 0.118500 | 0.137000 | 0.02176000 | 0.04427000 | ENST00000386414 | downstream | 10953  | ---       | ---       |
| rs10491882 | 9  | 112933887 | 0.3700 | 97.19% | 0.699300 | 0.400700 | 0.02177000 | 0.13840000 | NM_205859       | downstream | 195697 | Hs.381312 | OR2K2     |
| rs3846306  | 4  | 149350714 | 0.4394 | 92.63% | 0.454800 | 0.031710 | 0.02178000 | 0.02177000 | NM_000901       | intron     | 0      | Hs.163924 | NR3C2     |
| rs10500608 | 11 | 4628914   | 0.1149 | 91.58% | 0.058010 | 0.021970 | 0.02180000 | 0.08269000 | NM_152430       | intron     | 0      | Hs.669427 | OR51E1    |
| rs10508956 | 10 | 53304425  | 0.1775 | 91.93% | 0.831800 | 1.000000 | 0.02180000 | 0.01707000 | NM_006258       | intron     | 0      | Hs.654556 | PRKG1     |
| rs1360470  | 9  | 92476704  | 0.2944 | 87.02% | 0.647500 | 0.685700 | 0.02180000 | 0.13860000 | NM_017594       | upstream   | 31776  | Hs.165636 | DIRAS2    |
| rs1148259  | 10 | 37548456  | 0.4892 | 97.89% | 0.337800 | 0.364800 | 0.02183000 | 0.01968000 | NM_052997       | CDS        | 0      | Hs.373787 | ANKRD30A  |
| rs1864175  | 5  | 125191894 | 0.4946 | 97.54% | 0.904500 | 0.763500 | 0.02183000 | 0.01232000 | NM_023927       | upstream   | 595106 | Hs.363558 | GRAMD3    |
| rs7667916  | 4  | 76251680  | 0.0473 | 96.49% | 0.462000 | 1.000000 | 0.02183000 | 0.04998000 | NM_015393       | downstream | 57333  | Hs.105460 | DKFZP564O |
| rs1384737  | 15 | 91670604  | 0.2736 | 96.84% | 0.652200 | 0.288500 | 0.02184000 | 0.02688000 | ENST00000384809 | upstream   | 40048  | ---       | ---       |
| rs2328413  | 20 | 19495298  | 0.3832 | 96.14% | 1.000000 | 0.742100 | 0.02184000 | 0.04614000 | NM_020689       | intron     | 0      | Hs.654790 | SLC24A3   |
| rs10499943 | 7  | 97621894  | 0.1751 | 90.18% | 0.030820 | 0.016170 | 0.02185000 | 0.00671000 | NM_014916       | intron     | 0      | Hs.444179 | LMTK2     |
| rs10505301 | 8  | 118479876 | 0.2061 | 97.89% | 0.713900 | 0.441000 | 0.02186000 | 0.12090000 | NM_080651       | upstream   | 122335 | Hs.492612 | MED30     |
| rs2202802  | 6  | 54275640  | 0.3300 | 87.72% | 0.022140 | 0.184100 | 0.02186000 | 0.00047790 | NM_014464       | upstream   | 5522   | Hs.127011 | TINAG     |
| rs10488495 | 7  | 76287232  | 0.0498 | 95.09% | 1.000000 | 1.000000 | 0.02187000 | 0.00771300 | NM_152992       | upstream   | 192733 | Hs.488877 | POMZP3    |
| rs10518064 | 4  | 70455669  | 0.2680 | 97.54% | 0.359900 | 0.288900 | 0.02187000 | 0.23630000 | NM_006798       | downstream | 33893  | Hs.225950 | UGT2A1    |
| rs2683687  | 2  | 67612167  | 0.2680 | 97.54% | 0.541600 | 0.479500 | 0.02187000 | 0.02471000 | NM_019002       | downstream | 120989 | Hs.353022 | ETAA1     |
| rs10504211 | 8  | 58039887  | 0.2205 | 92.28% | 0.071550 | 0.310700 | 0.02188000 | 0.09296000 | NM_017813       | intron     | 0      | Hs.438689 | IMPAD1    |
| rs2305484  | 2  | 108271462 | 0.4734 | 85.61% | 0.198600 | 0.420600 | 0.02189000 | 0.07355000 | NM_176825       | upstream   | 65     | Hs.436123 | SULT1C2   |
| rs7782296  | 7  | 124240337 | 0.3635 | 91.23% | 0.502900 | 0.201200 | 0.02189000 | 0.08458000 | NM_001042594    | downstream | 10875  | Hs.31968  | POT1      |
| rs10518062 | 4  | 70438590  | 0.2688 | 97.89% | 0.365100 | 0.374400 | 0.02190000 | 0.22890000 | NM_021139       | upstream   | 42378  | Hs.285887 | UGT2B4    |
| rs10501109 | 11 | 29017696  | 0.1075 | 97.89% | 0.538400 | 1.000000 | 0.02191000 | 0.04202000 | NM_152636       | downstream | 706177 | Hs.243326 | METT5D1   |
| rs10519347 | 5  | 112621246 | 0.1848 | 96.84% | 0.841400 | 0.577900 | 0.02193000 | 0.04446000 | NM_002387       | intron     | 0      | Hs.593171 | MCC       |
| rs600589   | 18 | 8821217   | 0.4331 | 94.39% | 0.456300 | 0.880200 | 0.02193000 | 0.11460000 | NM_015210       | intron     | 0      | Hs.650822 | KIAA0802  |
| rs501125   | 11 | 91996379  | 0.0978 | 95.09% | 1.000000 | 0.258300 | 0.02194000 | 0.04614000 | ENST00000298047 | intron     | 0      | ---       | ---       |
| rs9290490  | 3  | 175243160 | 0.1345 | 92.63% | 0.059760 | 0.228600 | 0.02195000 | 0.11760000 | NM_014932       | intron     | 0      | Hs.478289 | NLGN1     |
| rs1420533  | 16 | 51121127  | 0.3883 | 95.79% | 0.898500 | 1.000000 | 0.02196000 | 0.00544700 | ENST00000388816 | intron     | 0      | ---       | ---       |
| rs10494574 | 1  | 182277350 | 0.3142 | 91.58% | 0.062130 | 0.064190 | 0.02197000 | 0.08706000 | NM_015101       | upstream   | 3864   | Hs.387995 | GLT25D2   |
| rs1371230  | 4  | 178378609 | 0.3714 | 96.84% | 0.199500 | 0.275400 | 0.02197000 | 0.06536000 | NM_018248       | upstream   | 89413  | Hs.405467 | NEIL3     |
| rs1812583  | 15 | 37541006  | 0.1134 | 94.39% | 0.356900 | 0.328100 | 0.02199000 | 0.04594000 | NM_003246       | upstream   | 119566 | Hs.164226 | THBS1     |
| rs2205892  | 1  | 167871378 | 0.4436 | 93.33% | 0.214800 | 0.648400 | 0.02199000 | 0.15000000 | NM_003005       | upstream   | 5355   | Hs.73800  | SELP      |

|            |    |           |        |        |          |          |            |            |                 |            |         |           |           |
|------------|----|-----------|--------|--------|----------|----------|------------|------------|-----------------|------------|---------|-----------|-----------|
| rs9285586  | 14 | 59432923  | 0.4094 | 89.12% | 0.245600 | 0.437300 | 0.02199000 | 0.04162000 | NM_206852       | upstream   | 265650  | Hs.368626 | RTN1      |
| rs10504160 | 8  | 55175649  | 0.0148 | 95.09% | 1.000000 | 1.000000 | 0.02204000 | 0.04087000 | NM_006330       | intron     | 0       | Hs.435850 | LYPLA1    |
| rs1669539  | 2  | 105981706 | 0.0148 | 95.09% | 1.000000 | 1.000000 | 0.02204000 | 0.00615400 | NM_032411       | upstream   | 66839   | Hs.43125  | C2orf40   |
| rs2457555  | 6  | 160720302 | 0.1735 | 94.04% | 0.831300 | 1.000000 | 0.02204000 | 0.02291000 | NM_021977       | intron     | 0       | Hs.567337 | SLC22A3   |
| rs7946903  | 11 | 83607739  | 0.0148 | 95.09% | 0.051040 | 1.000000 | 0.02204000 | 0.16270000 | NM_001364       | intron     | 0       | Hs.654862 | DLG2      |
| rs10505128 | 8  | 110894494 | 0.0263 | 93.33% | 1.000000 | 1.000000 | 0.02206000 | 0.05298000 | NM_017786       | upstream   | 164310  | Hs.390738 | GOLSYN    |
| rs2125834  | 15 | 21661869  | 0.0688 | 96.84% | 0.370700 | 0.625100 | 0.02206000 | 0.12530000 | NM_018958       | upstream   | 810239  | Hs.649663 | C15orf2   |
| rs7769725  | 6  | 23673083  | 0.1801 | 91.58% | 1.000000 | 1.000000 | 0.02208000 | 0.05514000 | ENST00000330282 | upstream   | 289778  | ---       | ---       |
| rs7573495  | 2  | 266942    | 0.2698 | 97.54% | 0.545900 | 1.000000 | 0.02210000 | 0.04079000 | NM_004300       | intron     | 0       | Hs.558296 | ACP1      |
| rs10513009 | 5  | 52407631  | 0.0791 | 97.54% | 1.000000 | 1.000000 | 0.02211000 | 0.06045000 | NM_002203       | intron     | 0       | Hs.482077 | ITGA2     |
| rs6817452  | 4  | 87390273  | 0.2202 | 85.26% | 0.000003 | 0.000073 | 0.02213000 | 0.24420000 | NM_138981       | intron     | 0       | Hs.125503 | MAPK10    |
| rs10495674 | 2  | 18023796  | 0.1716 | 95.09% | 1.000000 | 0.762400 | 0.02218000 | 0.02039000 | NM_002252       | downstream | 46087   | Hs.414489 | KCNS3     |
| rs4631686  | 1  | 14450061  | 0.1595 | 90.18% | 0.004521 | 0.003925 | 0.02218000 | 0.01269000 | NM_201628       | upstream   | 848051  | Hs.368823 | RP1-21O18 |
| rs10498453 | 14 | 53308392  | 0.1130 | 94.74% | 0.758600 | 1.000000 | 0.02221000 | 0.03009000 | NM_130851       | downstream | 177815  | Hs.68879  | BMP4      |
| rs10511602 | 9  | 14918013  | 0.0686 | 97.19% | 0.123800 | 0.129200 | 0.02221000 | 0.23620000 | NM_144966       | upstream   | 59038   | Hs.50850  | FREM1     |
| rs1826349  | 3  | 95647674  | 0.2068 | 97.54% | 0.714300 | 0.606200 | 0.02224000 | 0.16270000 | NM_022072       | downstream | 319354  | Hs.656338 | NSUN3     |
| rs10494617 | 1  | 187143468 | 0.0262 | 93.68% | 0.160400 | 0.213100 | 0.02226000 | 0.10240000 | NM_199051       | downstream | 1189952 | Hs.65765  | FAM5C     |
| rs10501059 | 11 | 26625743  | 0.1835 | 97.54% | 0.230500 | 0.772400 | 0.02227000 | 0.01908000 | NM_031418       | intron     | 0       | Hs.91791  | TMEM16C   |
| rs1899951  | 3  | 12369840  | 0.1144 | 95.09% | 0.366100 | 1.000000 | 0.02231000 | 0.02308000 | NM_005037       | intron     | 0       | Hs.162646 | PPARG     |
| rs10520901 | 5  | 24949824  | 0.1264 | 95.79% | 0.164600 | 0.078950 | 0.02233000 | 0.05678000 | ENST00000363041 | downstream | 3265    | ---       | ---       |
| rs1452237  | 12 | 83704259  | 0.2520 | 86.32% | 0.002125 | 0.020830 | 0.02233000 | 0.01407000 | NM_018057       | downstream | 94499   | Hs.44424  | SLC6A15   |
| rs1925151  | 6  | 56208749  | 0.0484 | 97.89% | 0.483500 | 0.529800 | 0.02233000 | 0.02781000 | NM_030820       | intron     | 0       | Hs.47629  | COL21A1   |
| rs1418505  | 9  | 120108148 | 0.2594 | 93.33% | 0.523300 | 0.855800 | 0.02236000 | 0.18430000 | NM_014618       | downstream | 860581  | Hs.532316 | DBC1      |
| rs4654438  | 1  | 4459761   | 0.3517 | 92.28% | 0.138500 | 0.145100 | 0.02236000 | 0.06098000 | NM_001042478    | upstream   | 154891  | Hs.25924  | AJAP1     |
| rs723595   | 8  | 51907585  | 0.3741 | 97.54% | 1.000000 | 0.438800 | 0.02236000 | 0.04751000 | NM_018967       | downstream | 39607   | Hs.584914 | SNTG1     |
| rs9324486  | 8  | 139428681 | 0.2268 | 94.39% | 0.295700 | 0.152800 | 0.02237000 | 0.00455500 | NM_015912       | intron     | 0       | Hs.126024 | FAM135B   |
| rs1342501  | 9  | 120196645 | 0.0956 | 95.44% | 0.721100 | 0.709800 | 0.02238000 | 0.01003000 | NM_014618       | downstream | 772084  | Hs.532316 | DBC1      |
| rs9309308  | 2  | 24848074  | 0.1138 | 94.04% | 0.358100 | 0.535100 | 0.02238000 | 0.01174000 | NM_147233       | downstream | 999     | Hs.699183 | NCOA1     |
| rs1502800  | 12 | 85000386  | 0.3225 | 96.84% | 0.131400 | 0.257900 | 0.02239000 | 0.05137000 | NM_013244       | upstream   | 32740   | Hs.662231 | MGAT4C    |
| rs598218   | 6  | 92451486  | 0.0683 | 97.54% | 0.028730 | 0.127600 | 0.02240000 | 0.04512000 | NM_145333       | upstream   | 1097858 | Hs.644143 | MAP3K7    |
| rs9285217  | 13 | 58468127  | 0.2528 | 93.68% | 0.747100 | 0.709000 | 0.02240000 | 0.03009000 | ENST00000365514 | upstream   | 468241  | ---       | ---       |
| rs2279152  | 19 | 57791787  | 0.4382 | 88.07% | 0.307400 | 0.149800 | 0.02241000 | 0.11230000 | ENST00000333303 | CDS        | 0       | ---       | ---       |
| rs997737   | 5  | 90602787  | 0.3439 | 94.39% | 0.006743 | 0.077740 | 0.02244000 | 0.03205000 | ENST00000362773 | downstream | 348     | ---       | ---       |
| rs1809139  | 2  | 173691122 | 0.3177 | 97.19% | 0.052720 | 0.039850 | 0.02245000 | 0.04634000 | NM_133646       | intron     | 0       | Hs.444451 | ZAK       |
| rs7995081  | 13 | 54781683  | 0.3125 | 92.63% | 0.389700 | 0.182000 | 0.02245000 | 0.07045000 | ENST00000258651 | upstream   | 868232  | ---       | ---       |
| rs259195   | 5  | 119128515 | 0.3257 | 84.56% | 0.000380 | 0.007753 | 0.02246000 | 0.05292000 | NM_182761       | downstream | 129100  | Hs.406861 | LOC340069 |
| rs2619483  | 12 | 25593934  | 0.1089 | 87.02% | 0.183500 | 0.487500 | 0.02246000 | 0.04233000 | NM_152590       | intron     | 0       | Hs.44647  | IFLTD1    |
| rs4730462  | 7  | 110211723 | 0.2079 | 97.89% | 0.277600 | 0.682300 | 0.02246000 | 0.05853000 | NM_032549       | intron     | 0       | Hs.655722 | IMMP2L    |
| rs10516320 | 4  | 17740057  | 0.0148 | 94.74% | 1.000000 | 1.000000 | 0.02247000 | 0.08338000 | NM_153686       | upstream   | 107460  | Hs.446201 | LCORL     |
| rs1325197  | 1  | 191418940 | 0.3057 | 92.98% | 0.885700 | 0.865700 | 0.02248000 | 0.02970000 | NM_003783       | intron     | 0       | Hs.518834 | B3GALT2   |
| rs1394003  | 4  | 112589872 | 0.3674 | 97.89% | 0.701300 | 0.437100 | 0.02249000 | 0.01586000 | NM_152400       | upstream   | 696255  | Hs.23439  | C4orf32   |
| rs297961   | 5  | 162909730 | 0.0945 | 96.49% | 1.000000 | 1.000000 | 0.02250000 | 0.00580700 | NM_182796       | downstream | 30826   | Hs.696057 | MAT2B     |
| rs4891315  | 18 | 63119836  | 0.3266 | 95.09% | 1.000000 | 0.624100 | 0.02250000 | 0.01958000 | NM_032160       | downstream | 204963  | Hs.124673 | DSEL      |
| rs10510934 | 3  | 65124441  | 0.0152 | 92.63% | 1.000000 | 1.000000 | 0.02254000 | 0.04698000 | NM_001033057    | downstream | 192652  | Hs.651939 | MAGI1     |
| rs10493729 | 1  | 82989954  | 0.1613 | 97.89% | 0.663300 | 0.528400 | 0.02257000 | 0.04635000 | NM_012302       | downstream | 759259  | Hs.24212  | LPHN2     |
| rs2903611  | 19 | 36346051  | 0.3213 | 97.19% | 0.782800 | 0.462400 | 0.02260000 | 0.29680000 | NM_020856       | downstream | 112789  | Hs.278436 | TSHZ3     |
| rs266508   | 1  | 180696351 | 0.3177 | 97.19% | 0.126800 | 1.000000 | 0.02261000 | 0.00776600 | NM_032267       | intron     | 0       | ---       | RGS12     |
| rs7936229  | 11 | 19204343  | 0.0841 | 81.40% | 1.000000 | 1.000000 | 0.02261000 | 0.00846900 | NM_024680       | intron     | 0       | Hs.523526 | E2F8      |
| rs3828488  | 4  | 178510024 | 0.2729 | 91.93% | 0.641600 | 0.479500 | 0.02262000 | 0.05327000 | NM_018248       | intron     | 0       | Hs.405467 | NEIL3     |
| rs715243   | 9  | 86406665  | 0.4387 | 94.39% | 0.457500 | 0.653400 | 0.02262000 | 0.07908000 | NM_022127       | upstream   | 261245  | Hs.591877 | SLC28A3   |
| rs4778189  | 15 | 25745823  | 0.4534 | 94.04% | 1.000000 | 0.756400 | 0.02264000 | 0.02411000 | NM_000275       | intron     | 0       | Hs.654411 | OCA2      |
| rs10496172 | 2  | 69893827  | 0.2122 | 97.54% | 0.720000 | 0.803800 | 0.02265000 | 0.00951700 | NM_001153       | intron     | 0       | Hs.422986 | ANXA4     |
| rs1063183  | 13 | 49387084  | 0.0815 | 96.84% | 0.697400 | 1.000000 | 0.02266000 | 0.06340000 | NM_020456       | 3UTR       | 0       | Hs.44235  | C13orf1   |
| rs1384739  | 15 | 91670679  | 0.2742 | 97.89% | 0.764000 | 0.292600 | 0.02268000 | 0.02466000 | ENST00000384809 | upstream   | 40123   | ---       | ---       |



|            |    |           |        |        |          |          |            |            |                 |            |         |           |          |
|------------|----|-----------|--------|--------|----------|----------|------------|------------|-----------------|------------|---------|-----------|----------|
| rs10486507 | 7  | 32366358  | 0.2259 | 94.74% | 0.863300 | 0.481700 | 0.02269000 | 0.08307000 | NM_005020       | upstream   | 288842  | Hs.655694 | PDE1C    |
| rs10499732 | 7  | 54378030  | 0.3965 | 89.82% | 0.298100 | 1.000000 | 0.02269000 | 0.00438500 | NM_001001707    | upstream   | 530920  | ---       | FLJ45974 |
| rs997435   | 1  | 19784062  | 0.0733 | 93.33% | 0.153200 | 0.160500 | 0.02269000 | 0.02907000 | NM_001032363    | upstream   | 11992   | Hs.466662 | C1orf151 |
| rs459784   | 5  | 129203740 | 0.0824 | 95.79% | 0.094240 | 0.019840 | 0.02270000 | 0.02681000 | NM_175856       | upstream   | 64682   | Hs.213137 | CHSY-2   |
| rs10499052 | 6  | 109992168 | 0.2077 | 91.23% | 1.000000 | 0.396100 | 0.02272000 | 0.01042000 | NM_001001706    | upstream   | 13735   | Hs.205144 | FLJ42177 |
| rs4425968  | 1  | 165420387 | 0.2293 | 93.33% | 0.298900 | 0.479500 | 0.02272000 | 0.01650000 | NM_002697       | upstream   | 36372   | Hs.493649 | POU2F1   |
| rs10495750 | 2  | 24847949  | 0.0502 | 94.39% | 0.496700 | 0.176200 | 0.02273000 | 0.06257000 | NM_147233       | downstream | 874     | Hs.699183 | NCOA1    |
| rs9309549  | 2  | 79453610  | 0.1245 | 97.19% | 1.000000 | 1.000000 | 0.02273000 | 0.15470000 | NM_138937       | upstream   | 213223  | Hs.567312 | REG3A    |
| rs952851   | 12 | 85001472  | 0.3255 | 96.49% | 0.101500 | 0.252900 | 0.02273000 | 0.05113000 | NM_013244       | upstream   | 33826   | Hs.662231 | MGAT4C   |
| rs770918   | 1  | 98701525  | 0.0806 | 97.89% | 0.694400 | 0.691100 | 0.02275000 | 0.03976000 | NM_152238       | upstream   | 198481  | Hs.197015 | SNX7     |
| rs727954   | 1  | 193278268 | 0.2318 | 91.58% | 0.083720 | 0.476100 | 0.02276000 | 0.02070000 | NM_198503       | downstream | 1183268 | Hs.657046 | KCNT2    |
| rs10483653 | 14 | 55915344  | 0.1530 | 94.04% | 0.032230 | 0.483700 | 0.02277000 | 0.04153000 | NM_021255       | downstream | 77571   | Hs.657926 | PELI2    |
| rs1943723  | 11 | 84259364  | 0.4627 | 94.04% | 1.000000 | 0.878000 | 0.02280000 | 0.07635000 | ENST00000376104 | intron     | 0       | ---       | ---      |
| rs6974676  | 7  | 40974255  | 0.0531 | 89.12% | 0.002729 | 0.186100 | 0.02280000 | 0.03341000 | NM_002192       | downstream | 720871  | Hs.583348 | INHBA    |
| rs10514994 | 5  | 65775312  | 0.2375 | 91.58% | 1.000000 | 0.646300 | 0.02281000 | 0.01893000 | NM_001001703    | downstream | 125303  | ---       | FLJ46010 |
| rs10515844 | 5  | 162175115 | 0.1655 | 96.49% | 0.275700 | 0.094670 | 0.02281000 | 0.09907000 | NM_199246       | upstream   | 622040  | Hs.79101  | CCNG1    |
| rs1540988  | 10 | 4061155   | 0.0891 | 90.53% | 0.703400 | 0.696400 | 0.02282000 | 0.17740000 | NM_001300       | upstream   | 243688  | Hs.4055   | KLF6     |
| rs871853   | 5  | 175214916 | 0.2299 | 91.58% | 0.483400 | 0.327300 | 0.02283000 | 0.13060000 | NM_001008220    | intron     | 0       | Hs.193235 | CPLX2    |
| rs10519505 | 15 | 23395922  | 0.1212 | 91.23% | 0.075280 | 0.189700 | 0.02285000 | 0.10160000 | NM_024490       | downstream | 77591   | Hs.659258 | ATP10A   |
| rs7327037  | 13 | 37246306  | 0.4498 | 94.39% | 0.712300 | 0.453500 | 0.02285000 | 0.04887000 | NM_016179       | intron     | 0       | Hs.262960 | TRPC4    |
| rs10508250 | 10 | 3280142   | 0.1320 | 94.39% | 0.591700 | 0.578400 | 0.02286000 | 0.00291100 | NM_014889       | upstream   | 75143   | Hs.528300 | PITRM1   |
| rs10521242 | 16 | 49914711  | 0.1890 | 89.12% | 0.683500 | 1.000000 | 0.02287000 | 0.02862000 | NM_002968       | upstream   | 172058  | Hs.135787 | SALL1    |
| rs2827980  | 21 | 23524857  | 0.0701 | 97.54% | 0.138800 | 0.362100 | 0.02290000 | 0.13270000 | ENST00000364042 | downstream | 51108   | ---       | ---      |
| rs10487144 | 7  | 98370725  | 0.0149 | 94.39% | 0.051410 | 1.000000 | 0.02291000 | 0.04626000 | NM_003496       | intron     | 0       | Hs.203952 | TRRAP    |
| rs10495263 | 1  | 225326507 | 0.0783 | 87.37% | 0.177200 | 0.652400 | 0.02291000 | 0.00576800 | NM_003607       | intron     | 0       | Hs.35433  | CDC42BPA |
| rs10515518 | 5  | 142237775 | 0.0259 | 94.74% | 1.000000 | 1.000000 | 0.02291000 | 0.07999000 | NM_015071       | intron     | 0       | Hs.654668 | ARHGAP26 |
| rs10501382 | 11 | 59789067  | 0.1276 | 85.26% | 0.244800 | 0.648800 | 0.02292000 | 0.04383000 | NM_148975       | upstream   | 15583   | Hs.325960 | MS4A4A   |
| rs10499871 | 7  | 82336411  | 0.1500 | 94.74% | 0.089270 | 0.316100 | 0.02293000 | 0.06822000 | ENST00000389476 | intron     | 0       | ---       | ---      |
| rs10521231 | 17 | 13455247  | 0.1343 | 94.04% | 0.110400 | 0.395600 | 0.02293000 | 0.01001000 | NM_006042       | upstream   | 9278    | Hs.462270 | HS3ST3A1 |
| rs2124297  | 18 | 9651222   | 0.1802 | 90.53% | 0.020750 | 0.033820 | 0.02293000 | 0.00820600 | NM_006868       | upstream   | 47043   | Hs.99528  | RAB31    |
| rs10519250 | 15 | 48056765  | 0.2292 | 92.63% | 0.162600 | 0.141200 | 0.02294000 | 0.03528000 | NM_024837       | intron     | 0       | Hs.511311 | ATP8B4   |
| rs445945   | 20 | 15019192  | 0.2050 | 91.58% | 0.058280 | 0.423700 | 0.02294000 | 0.14410000 | NM_001033086    | intron     | 0       | ---       | MACROD2  |
| rs643630   | 6  | 124839601 | 0.2471 | 89.47% | 0.867000 | 1.000000 | 0.02294000 | 0.00404500 | NM_001040214    | intron     | 0       | Hs.656604 | NKAIN2   |
| rs10515379 | 5  | 107167562 | 0.1930 | 95.44% | 0.439800 | 0.783800 | 0.02296000 | 0.15080000 | ENST00000386422 | upstream   | 6664    | ---       | ---      |
| rs1372393  | 2  | 154401057 | 0.0712 | 96.14% | 0.633900 | 1.000000 | 0.02297000 | 0.04122000 | NM_052917       | upstream   | 35655   | Hs.470277 | GALNT13  |
| rs6135875  | 20 | 16675859  | 0.2167 | 94.74% | 1.000000 | 0.682200 | 0.02297000 | 0.01503000 | NM_020157       | upstream   | 1144    | Hs.41119  | OTOR     |
| rs2939659  | 8  | 56549343  | 0.2455 | 96.49% | 0.514500 | 0.112400 | 0.02298000 | 0.01059000 | NM_052898       | intron     | 0       | Hs.130197 | XKR4     |
| rs717326   | 9  | 21948524  | 0.2800 | 96.49% | 0.071510 | 0.413600 | 0.02298000 | 0.00817400 | ENST00000380190 | intron     | 0       | ---       | ---      |
| rs939344   | 8  | 61158811  | 0.1619 | 97.54% | 1.000000 | 1.000000 | 0.02298000 | 0.07199000 | NM_004056       | downstream | 105166  | Hs.654388 | CA8      |
| rs2349775  | 7  | 8684605   | 0.2401 | 97.19% | 0.510700 | 0.256400 | 0.02301000 | 0.02827000 | NM_152745       | upstream   | 72558   | Hs.487564 | NXP1     |
| rs2966312  | 16 | 83164493  | 0.2818 | 96.49% | 0.298200 | 0.294300 | 0.02302000 | 0.04726000 | NM_021149       | intron     | 0       | Hs.289092 | COTL1    |
| rs10489974 | 2  | 101815260 | 0.0809 | 97.54% | 0.695400 | 0.691100 | 0.02303000 | 0.02172000 | NM_145687       | intron     | 0       | Hs.431550 | MAP4K4   |
| rs10512559 | 17 | 66544068  | 0.3569 | 94.39% | 0.894300 | 0.753500 | 0.02303000 | 0.04890000 | ENST00000388517 | upstream   | 29251   | ---       | ---      |
| rs10488462 | 7  | 134160338 | 0.0728 | 94.04% | 0.038950 | 0.156400 | 0.02304000 | 0.10870000 | NM_033140       | intron     | 0       | Hs.490203 | CALD1    |
| rs434686   | 21 | 17182222  | 0.3011 | 94.39% | 0.385500 | 0.183200 | 0.02305000 | 0.02915000 | ENST00000365203 | downstream | 168875  | ---       | ---      |
| rs10521192 | 16 | 48354035  | 0.4451 | 86.32% | 0.070360 | 0.057380 | 0.02306000 | 0.00675300 | NM_015069       | intron     | 0       | Hs.530930 | ZNF423   |
| rs1567442  | 6  | 160777305 | 0.2357 | 92.28% | 1.000000 | 0.440100 | 0.02307000 | 0.01567000 | NM_021977       | intron     | 0       | Hs.567337 | SLC22A3  |
| rs3949926  | 1  | 87332366  | 0.0897 | 64.56% | 0.007491 | 0.043910 | 0.02309000 | 0.08244000 | NM_012262       | intron     | 0       | Hs.48823  | HS2ST1   |
| rs720863   | 6  | 76664374  | 0.4776 | 94.04% | 0.177600 | 0.289400 | 0.02309000 | 0.09761000 | NM_004999       | intron     | 0       | Hs.149387 | MYO6     |
| rs10518676 | 15 | 38037969  | 0.3895 | 96.84% | 0.527500 | 0.877600 | 0.02310000 | 0.05720000 | NM_001013703    | intron     | 0       | Hs.656673 | EIF2AK4  |
| rs10518932 | 15 | 35376766  | 0.1886 | 95.79% | 0.232500 | 0.389100 | 0.02311000 | 0.17050000 | NM_020149       | upstream   | 196093  | ---       | MEIS2    |
| rs1597082  | 3  | 68066123  | 0.2419 | 97.89% | 0.140900 | 0.851100 | 0.02311000 | 0.29720000 | NM_213609       | upstream   | 72337   | Hs.655061 | FAM19A1  |
| rs220793   | 6  | 165727492 | 0.3231 | 97.19% | 0.492700 | 0.365500 | 0.02311000 | 0.01707000 | NM_006661       | intron     | 0       | Hs.584856 | PDE10A   |
| rs10491361 | 5  | 149188961 | 0.1434 | 97.89% | 1.000000 | 0.474800 | 0.02312000 | 0.00644100 | NM_133263       | intron     | 0       | Hs.591261 | PPARGC1B |

|            |    |           |        |        |          |          |            |            |                 |            |        |           |           |
|------------|----|-----------|--------|--------|----------|----------|------------|------------|-----------------|------------|--------|-----------|-----------|
| rs10491533 | 9  | 112904471 | 0.3537 | 94.74% | 0.507400 | 0.862700 | 0.02312000 | 0.11510000 | NM_205859       | downstream | 225113 | Hs.381312 | OR2K2     |
| rs10513692 | 3  | 172322849 | 0.0157 | 89.12% | 1.000000 | 1.000000 | 0.02312000 | 0.03249000 | NM_015028       | intron     | 0      | Hs.34024  | TNIK      |
| rs7334629  | 13 | 60196965  | 0.0304 | 63.51% | 0.007343 | 1.000000 | 0.02314000 | 0.10810000 | ENST00000384127 | upstream   | 64730  | ---       | ---       |
| rs4780417  | 16 | 12270901  | 0.3679 | 92.98% | 0.291000 | 0.308900 | 0.02315000 | 0.47650000 | ENST00000306030 | intron     | 0      | ---       | ---       |
| rs846963   | 6  | 108075563 | 0.1000 | 92.98% | 0.309500 | 1.000000 | 0.02317000 | 0.13830000 | NM_018013       | intron     | 0      | Hs.445244 | SOBP      |
| rs10520528 | 4  | 183497595 | 0.3500 | 87.72% | 0.025580 | 0.203000 | 0.02318000 | 0.03525000 | ENST00000330336 | intron     | 0      | ---       | ---       |
| rs10496836 | 2  | 140665189 | 0.5000 | 78.60% | 0.000000 | 0.000004 | 0.02320000 | 0.03180000 | ENST00000385554 | upstream   | 26102  | ---       | ---       |
| rs10503938 | 8  | 32979287  | 0.0109 | 96.84% | 0.027070 | 1.000000 | 0.02322000 | 0.04070000 | ENST00000387834 | upstream   | 9219   | ---       | ---       |
| rs2807562  | 1  | 15106616  | 0.2164 | 96.49% | 0.285100 | 0.103100 | 0.02322000 | 0.14350000 | NM_201628       | intron     | 0      | Hs.368823 | RP1-21O18 |
| rs558325   | 1  | 66537540  | 0.0784 | 89.47% | 1.000000 | 1.000000 | 0.02322000 | 0.05573000 | NM_001037341    | intron     | 0      | Hs.198072 | PDE4B     |
| rs1765738  | 13 | 100181091 | 0.0116 | 90.88% | 1.000000 | 1.000000 | 0.02323000 | 0.09069000 | ENST00000376232 | upstream   | 30870  | ---       | ---       |
| rs10501793 | 11 | 91957395  | 0.1531 | 95.09% | 1.000000 | 0.489600 | 0.02324000 | 0.02530000 | ENST00000298047 | intron     | 0      | ---       | ---       |
| rs1443513  | 3  | 64399311  | 0.3539 | 93.68% | 0.893800 | 0.630100 | 0.02327000 | 0.08321000 | NM_198859       | upstream   | 213140 | Hs.699317 | PRICKLE2  |
| rs10511760 | 9  | 25556450  | 0.3320 | 88.77% | 0.001802 | 0.011010 | 0.02328000 | 0.04578000 | NM_001004125    | downstream | 111231 | Hs.26268  | TUSC1     |
| rs10503549 | 8  | 15632795  | 0.0251 | 97.89% | 1.000000 | 1.000000 | 0.02332000 | 0.16110000 | NM_178234       | intron     | 0      | Hs.591845 | TUSC3     |
| rs4108601  | 2  | 51729670  | 0.0251 | 97.89% | 0.153900 | 0.202100 | 0.02332000 | 0.03360000 | ENST00000378257 | upstream   | 620761 | ---       | ---       |
| rs1914812  | 3  | 118196781 | 0.0701 | 97.54% | 1.000000 | 1.000000 | 0.02333000 | 0.20750000 | ENST00000363502 | upstream   | 30018  | ---       | ---       |
| rs1355806  | 4  | 69674823  | 0.2906 | 71.23% | 0.500600 | 0.639200 | 0.02334000 | 0.01117000 | NM_001075       | upstream   | 41479  | Hs.201634 | UGT2B10   |
| rs1028777  | 8  | 139146388 | 0.2156 | 96.84% | 0.860000 | 0.684300 | 0.02336000 | 0.01776000 | NM_015912       | downstream | 67320  | Hs.126024 | FAM135B   |
| rs10509069 | 10 | 58405558  | 0.2130 | 97.19% | 0.029810 | 0.025160 | 0.02336000 | 0.36400000 | NM_001005414    | upstream   | 614516 | ---       | ZWINT     |
| rs17062422 | 6  | 102284737 | 0.0149 | 94.04% | 0.051600 | 1.000000 | 0.02336000 | 0.02101000 | NM_175768       | intron     | 0      | Hs.654523 | GRIK2     |
| rs643599   | 7  | 42950715  | 0.1867 | 81.75% | 0.200400 | 0.765300 | 0.02336000 | 0.06432000 | NM_031903       | downstream | 6739   | Hs.50252  | MRPL32    |
| rs10504995 | 8  | 101236990 | 0.2510 | 88.77% | 0.003993 | 0.012540 | 0.02338000 | 0.03433000 | NM_005034       | downstream | 1584   | Hs.351475 | POLR2K    |
| rs1424118  | 16 | 6051074   | 0.1649 | 97.89% | 0.828400 | 1.000000 | 0.02338000 | 0.01977000 | NM_001013705    | upstream   | 316691 | ---       | LOC440337 |
| rs4887987  | 16 | 77371955  | 0.1884 | 96.84% | 0.692800 | 0.157500 | 0.02339000 | 0.30840000 | NM_130844       | intron     | 0      | Hs.461453 | WFOX      |
| rs2042741  | 15 | 42177578  | 0.1007 | 94.04% | 1.000000 | 1.000000 | 0.02340000 | 0.13550000 | NM_032892       | intron     | 0      | Hs.578544 | FRMD5     |
| rs431903   | 5  | 95003757  | 0.0746 | 94.04% | 0.046370 | 0.047940 | 0.02340000 | 0.01999000 | NM_173362       | upstream   | 4557   | Hs.399758 | RFESD     |
| rs6503349  | 17 | 10874193  | 0.0752 | 93.33% | 0.171900 | 0.180300 | 0.02340000 | 0.04338000 | ENST00000386899 | upstream   | 127304 | ---       | ---       |
| rs10509984 | 10 | 115457298 | 0.0396 | 97.54% | 0.351000 | 1.000000 | 0.02341000 | 0.06265000 | NM_033339       | intron     | 0      | Hs.9216   | CASP7     |
| rs2419912  | 5  | 157777113 | 0.2826 | 96.84% | 0.237000 | 0.429200 | 0.02341000 | 0.05833000 | NM_024007       | downstream | 281584 | Hs.657753 | EBF1      |
| rs9288163  | 2  | 189721391 | 0.1873 | 88.07% | 0.094830 | 0.545300 | 0.02343000 | 0.12500000 | NM_000393       | intron     | 0      | Hs.445827 | COL5A2    |
| rs7602328  | 2  | 28088688  | 0.3684 | 93.33% | 0.116100 | 0.393700 | 0.02345000 | 0.08940000 | NM_199192       | intron     | 0      | Hs.258314 | BRE       |
| rs1489635  | 2  | 163736991 | 0.2574 | 94.74% | 0.427200 | 1.000000 | 0.02346000 | 0.11350000 | NM_173162       | upstream   | 333717 | Hs.657413 | KCNH7     |
| rs16952186 | 15 | 37812517  | 0.2182 | 96.49% | 1.000000 | 0.216200 | 0.02346000 | 0.01996000 | NM_152597       | intron     | 0      | Hs.129598 | FSIP1     |
| rs9319810  | 18 | 52024294  | 0.2770 | 97.54% | 0.550900 | 0.220900 | 0.02346000 | 0.03160000 | NM_004786       | downstream | 396759 | Hs.114412 | TXNL1     |
| rs10506378 | 12 | 57068256  | 0.0253 | 97.19% | 1.000000 | 1.000000 | 0.02347000 | 0.02480000 | NM_153377       | downstream | 483949 | Hs.253736 | LRIG3     |
| rs6748937  | 2  | 184738190 | 0.2698 | 92.98% | 0.639600 | 0.719000 | 0.02349000 | 0.03902000 | NM_194250       | upstream   | 433742 | Hs.159528 | ZNF804A   |
| rs7129170  | 11 | 35711040  | 0.0996 | 95.09% | 0.316900 | 0.291800 | 0.02350000 | 0.09387000 | NM_017583       | intron     | 0      | Hs.591987 | TRIM44    |
| rs16915547 | 11 | 90461508  | 0.1225 | 88.77% | 0.000034 | 0.000897 | 0.02352000 | 0.03470000 | NM_012124       | upstream   | 865681 | Hs.22857  | CHORDC1   |
| rs6453843  | 6  | 76615205  | 0.0519 | 94.74% | 0.150000 | 0.178000 | 0.02353000 | 0.06290000 | NM_004999       | intron     | 0      | Hs.149387 | MYO6      |
| rs10505998 | 12 | 26428161  | 0.0722 | 94.74% | 0.038020 | 0.037810 | 0.02354000 | 0.07406000 | NM_002223       | intron     | 0      | Hs.512235 | ITPR2     |
| rs10486765 | 7  | 15599931  | 0.4889 | 95.09% | 0.330800 | 0.233500 | 0.02355000 | 0.19370000 | NM_005924       | downstream | 17431  | Hs.170355 | MEOX2     |
| rs2223995  | 6  | 134977457 | 0.3223 | 89.82% | 0.151500 | 0.232900 | 0.02356000 | 0.00484900 | NM_005627       | upstream   | 439777 | Hs.510078 | SGK1      |
| rs10513169 | 9  | 114633691 | 0.0741 | 94.74% | 0.166400 | 0.173700 | 0.02357000 | 0.04182000 | ENST00000277244 | intron     | 0      | ---       | ---       |
| rs10500269 | 19 | 39174218  | 0.0522 | 94.04% | 0.026730 | 0.033750 | 0.02359000 | 0.03210000 | ENST00000387184 | upstream   | 63848  | ---       | ---       |
| rs1073572  | 17 | 66467656  | 0.2133 | 97.89% | 0.720600 | 0.684200 | 0.02360000 | 0.03556000 | NM_000891       | downstream | 779901 | Hs.1547   | KCNJ2     |
| rs1679384  | 12 | 74247599  | 0.2970 | 95.09% | 0.041790 | 0.439500 | 0.02362000 | 0.04508000 | NM_007043       | upstream   | 55940  | Hs.645517 | KRR1      |
| rs1383673  | 4  | 12267660  | 0.4182 | 96.49% | 0.385300 | 0.427300 | 0.02365000 | 0.03280000 | ENST00000387175 | downstream | 344248 | ---       | ---       |
| rs17700588 | 2  | 18581216  | 0.0887 | 92.98% | 0.441200 | 0.434200 | 0.02366000 | 0.01438000 | NM_020905       | downstream | 18254  | Hs.288880 | RDH14     |
| rs9639563  | 7  | 27721012  | 0.4283 | 83.16% | 0.508500 | 0.872900 | 0.02366000 | 0.04144000 | NM_006024       | upstream   | 25321  | Hs.34576  | TAX1BP1   |
| rs10500638 | 11 | 5346395   | 0.4852 | 95.09% | 0.144400 | 0.365200 | 0.02367000 | 0.03732000 | NM_005330       | intron     | 0      | Hs.655195 | HBE1      |
| rs6424701  | 1  | 80639887  | 0.2286 | 94.39% | 1.000000 | 0.560000 | 0.02368000 | 0.07527000 | ENST00000388387 | upstream   | 850175 | ---       | ---       |
| rs4964063  | 12 | 23085765  | 0.1167 | 94.74% | 0.550900 | 1.000000 | 0.02373000 | 0.08515000 | NM_178010       | downstream | 490734 | Hs.657542 | SOX5      |
| rs1401968  | 3  | 152993775 | 0.4297 | 89.82% | 0.055430 | 0.145900 | 0.02376000 | 0.17160000 | NM_001086       | upstream   | 20776  | Hs.506908 | AADAC     |

|            |    |           |        |        |          |          |            |            |                 |            |        |           |          |
|------------|----|-----------|--------|--------|----------|----------|------------|------------|-----------------|------------|--------|-----------|----------|
| rs10508262 | 10 | 3741274   | 0.2151 | 97.89% | 0.477700 | 0.621400 | 0.02377000 | 0.04473000 | NM_001300       | downstream | 66914  | Hs.4055   | KLF6     |
| rs1604105  | 5  | 83657237  | 0.3132 | 92.98% | 0.475200 | 1.000000 | 0.02377000 | 0.00779000 | NM_005711       | intron     | 0      | Hs.482730 | EDIL3    |
| rs7206384  | 16 | 51299759  | 0.1753 | 95.09% | 0.832900 | 0.815600 | 0.02377000 | 0.02448000 | NM_025134       | upstream   | 447580 | Hs.59159  | CHD9     |
| rs1560469  | 17 | 51479991  | 0.4179 | 96.14% | 0.012900 | 0.048080 | 0.02378000 | 0.03006000 | NM_153228       | upstream   | 105850 | Hs.673040 | ANKFN1   |
| rs2344804  | 4  | 158613607 | 0.4649 | 95.09% | 0.903400 | 0.760100 | 0.02378000 | 0.00984300 | NM_000826       | downstream | 106930 | Hs.32763  | GRIA2    |
| rs1981261  | 6  | 63806154  | 0.3622 | 78.95% | 0.061720 | 0.009793 | 0.02379000 | 0.00899400 | ENST00000356170 | upstream   | 173267 | ---       | ---      |
| rs4666764  | 2  | 189350464 | 0.2205 | 89.12% | 0.583200 | 0.540600 | 0.02379000 | 0.04142000 | NM_052952       | intron     | 0      | Hs.470892 | DIRC1    |
| rs285050   | 13 | 97560454  | 0.0827 | 97.54% | 1.000000 | 0.499000 | 0.02380000 | 0.12240000 | NM_001001715    | upstream   | 32981  | Hs.403917 | FARP1    |
| rs1995381  | 5  | 75606414  | 0.1463 | 86.32% | 0.007867 | 0.090830 | 0.02381000 | 0.07868000 | NM_014979       | intron     | 0      | Hs.663229 | SV2C     |
| rs681870   | 9  | 29529147  | 0.1113 | 86.67% | 0.018440 | 0.098660 | 0.02382000 | 0.02042000 | NM_152570       | upstream   | 868864 | Hs.699432 | LINGO2   |
| rs1412116  | 10 | 34113154  | 0.1875 | 44.91% | 0.000069 | 0.002500 | 0.02383000 | 0.16320000 | NM_019619       | downstream | 326949 | Hs.131489 | PARD3    |
| rs1466863  | 16 | 68461639  | 0.3333 | 95.79% | 0.496000 | 0.627200 | 0.02383000 | 0.15240000 | NM_199423       | intron     | 0      | Hs.408458 | WWP2     |
| rs1386389  | 4  | 112172719 | 0.3244 | 97.89% | 0.101200 | 0.363400 | 0.02389000 | 0.01945000 | NM_000325       | upstream   | 409016 | Hs.643588 | PITX2    |
| rs9312601  | 4  | 177604036 | 0.4025 | 97.19% | 0.261300 | 0.069490 | 0.02389000 | 0.37150000 | NM_021928       | downstream | 116698 | Hs.42194  | SPCS3    |
| rs250888   | 5  | 131043245 | 0.3280 | 97.89% | 0.175800 | 0.367700 | 0.02391000 | 0.01254000 | NM_001008738    | intron     | 0      | Hs.591273 | FNIP1    |
| rs10503371 | 8  | 6376190   | 0.3818 | 90.53% | 0.597500 | 0.263700 | 0.02392000 | 0.02263000 | NM_024596       | intron     | 0      | Hs.656769 | MCPH1    |
| rs4344939  | 2  | 18703181  | 0.2537 | 95.44% | 0.038200 | 0.049780 | 0.02393000 | 0.05120000 | NM_033253       | upstream   | 68862  | Hs.120319 | NTSC1B   |
| rs4448156  | 7  | 18051547  | 0.1101 | 97.19% | 0.549900 | 0.743200 | 0.02394000 | 0.03456000 | NM_175886       | upstream   | 17620  | Hs.169284 | PRPS1L1  |
| rs10516730 | 4  | 86200300  | 0.1612 | 75.09% | 0.038430 | 0.054250 | 0.02395000 | 0.01894000 | ENST00000365031 | upstream   | 40373  | ---       | ---      |
| rs10492036 | 12 | 124770007 | 0.1577 | 84.56% | 0.146000 | 0.314800 | 0.02396000 | 0.04310000 | NM_052907       | downstream | 64691  | Hs.524838 | TMEM132B |
| rs352716   | 15 | 100155950 | 0.3872 | 93.33% | 0.093000 | 0.248800 | 0.02396000 | 0.00876500 | NM_001005326    | upstream   | 7496   | Hs.553399 | OR4F6    |
| rs10512534 | 17 | 65490477  | 0.0155 | 90.53% | 1.000000 | 1.000000 | 0.02398000 | 0.07744000 | NM_002758       | downstream | 439410 | Hs.463978 | MAP2K6   |
| rs6140226  | 20 | 7174483   | 0.4111 | 88.77% | 0.698100 | 0.875200 | 0.02398000 | 0.02921000 | NM_001200       | downstream | 465573 | Hs.73853  | BMP2     |
| rs2216236  | 12 | 95615010  | 0.1105 | 96.84% | 0.549600 | 0.625100 | 0.02399000 | 0.07979000 | NM_198520       | intron     | 0      | Hs.436197 | C12orf63 |
| rs722151   | 4  | 159409295 | 0.2420 | 87.72% | 0.489500 | 0.160900 | 0.02401000 | 0.00526600 | NM_018342       | downstream | 13409  | Hs.176227 | TMEM144  |
| rs229809   | 14 | 82983679  | 0.0849 | 95.09% | 1.000000 | 0.509500 | 0.02403000 | 0.02280000 | ENST00000387648 | downstream | 140449 | ---       | ---      |
| rs2375988  | 4  | 36280171  | 0.1716 | 95.09% | 0.668800 | 0.130000 | 0.02403000 | 0.01723000 | ENST00000357504 | downstream | 258360 | ---       | ---      |
| rs1196185  | 2  | 182593204 | 0.2630 | 94.74% | 0.345100 | 0.527800 | 0.02404000 | 0.01191000 | ENST00000280295 | intron     | 0      | ---       | ---      |
| rs2359189  | 12 | 49778776  | 0.1941 | 95.79% | 0.331300 | 0.784800 | 0.02405000 | 0.03951000 | NM_005653       | intron     | 0      | Hs.699156 | TFCP2    |
| rs851407   | 2  | 19307439  | 0.1115 | 97.54% | 0.759400 | 0.530600 | 0.02405000 | 0.10340000 | NM_145260       | downstream | 107288 | Hs.123933 | OSR1     |
| rs10505420 | 8  | 123532174 | 0.1454 | 88.07% | 0.071950 | 0.265600 | 0.02406000 | 0.01788000 | NM_005328       | upstream   | 809363 | Hs.571528 | HAS2     |
| rs1597083  | 3  | 68067518  | 0.2004 | 93.68% | 0.000002 | 0.000015 | 0.02407000 | 0.21740000 | NM_213609       | upstream   | 70942  | Hs.655061 | FAM19A1  |
| rs1861245  | 2  | 102333338 | 0.4015 | 92.63% | 0.372400 | 1.000000 | 0.02407000 | 0.12300000 | NM_016232       | intron     | 0      | Hs.66     | IL1RL1   |
| rs756176   | 4  | 90218431  | 0.2072 | 92.28% | 0.186900 | 0.529500 | 0.02408000 | 0.20620000 | NM_001015045    | upstream   | 21085  | Hs.702033 | FAM13A1  |
| rs965010   | 11 | 96409418  | 0.2842 | 97.54% | 1.000000 | 0.387500 | 0.02408000 | 0.05270000 | ENST00000362445 | upstream   | 624256 | ---       | ---      |
| rs10496903 | 2  | 142325253 | 0.3217 | 85.61% | 0.005124 | 0.012350 | 0.02409000 | 0.01040000 | NM_018557       | intron     | 0      | Hs.656461 | LRP1B    |
| rs1344869  | 3  | 21282605  | 0.2879 | 81.05% | 0.203600 | 0.277500 | 0.02411000 | 0.00672400 | ENST00000295509 | upstream   | 139919 | ---       | ---      |
| rs1436524  | 4  | 87158801  | 0.1111 | 97.89% | 0.356600 | 0.528400 | 0.02411000 | 0.10150000 | NM_138981       | intron     | 0      | Hs.125503 | MAPK10   |
| rs1436336  | 3  | 106156256 | 0.1171 | 94.39% | 0.382500 | 1.000000 | 0.02412000 | 0.00716000 | NM_001627       | upstream   | 412147 | Hs.591293 | ALCAM    |
| rs1884022  | 1  | 185269042 | 0.3648 | 94.74% | 0.600100 | 1.000000 | 0.02418000 | 0.06460000 | NM_024420       | downstream | 44306  | Hs.497200 | PLA2G4A  |
| rs8029355  | 15 | 48074273  | 0.1127 | 96.49% | 0.361100 | 0.532800 | 0.02418000 | 0.04274000 | NM_024837       | intron     | 0      | Hs.511311 | ATP8B4   |
| rs6563812  | 13 | 39741805  | 0.4758 | 94.39% | 0.142900 | 0.217500 | 0.02423000 | 0.03148000 | NM_002015       | downstream | 286012 | Hs.370666 | FOXO1    |
| rs10489312 | 1  | 173793149 | 0.0696 | 83.16% | 0.308900 | 1.000000 | 0.02425000 | 0.03805000 | ENST00000367674 | intron     | 0      | ---       | ---      |
| rs1882257  | 3  | 172933446 | 0.3628 | 93.33% | 0.427800 | 1.000000 | 0.02429000 | 0.15030000 | NM_002662       | intron     | 0      | Hs.382865 | PLD1     |
| rs823692   | 6  | 7435616   | 0.0627 | 95.09% | 0.609300 | 1.000000 | 0.02431000 | 0.06180000 | NM_153005       | downstream | 72347  | Hs.591353 | RIOK1    |
| rs492781   | 1  | 57522014  | 0.3966 | 91.58% | 0.796800 | 1.000000 | 0.02434000 | 0.13400000 | NM_021080       | intron     | 0      | Hs.477370 | DAB1     |
| rs9291501  | 4  | 27145749  | 0.3363 | 97.54% | 0.140100 | 0.213400 | 0.02435000 | 0.04119000 | ENST00000363691 | upstream   | 311602 | ---       | ---      |
| rs3806052  | 6  | 70943505  | 0.3849 | 92.98% | 0.896800 | 0.441200 | 0.02436000 | 0.05407000 | NM_001858       | intron     | 0      | Hs.444842 | COL19A1  |
| rs670044   | 8  | 9929939   | 0.3699 | 94.39% | 1.000000 | 0.614300 | 0.02436000 | 0.01191000 | NM_012331       | upstream   | 19249  | Hs.490981 | MSRA     |
| rs3768416  | 1  | 224988063 | 0.0507 | 96.84% | 0.144700 | 0.175300 | 0.02441000 | 0.00614500 | NM_002221       | intron     | 0      | Hs.528087 | ITPKB    |
| rs1163969  | 12 | 17425668  | 0.3978 | 97.89% | 1.000000 | 0.449800 | 0.02442000 | 0.02066000 | ENST00000386797 | upstream   | 309962 | ---       | ---      |
| rs1008582  | 7  | 33365456  | 0.1387 | 83.51% | 0.586500 | 0.220200 | 0.02445000 | 0.00257600 | NM_001033605    | intron     | 0      | Hs.372360 | BBS9     |
| rs710070   | 14 | 61145062  | 0.0243 | 86.67% | 1.000000 | 1.000000 | 0.02448000 | 0.15110000 | NM_006255       | downstream | 57619  | Hs.333907 | PRKCH    |
| rs10505793 | 12 | 16215985  | 0.1426 | 89.82% | 1.000000 | 1.000000 | 0.02450000 | 0.04232000 | NM_015954       | downstream | 134509 | Hs.39429  | DERA     |

|            |    |           |        |        |          |          |            |            |                 |            |         |           |          |
|------------|----|-----------|--------|--------|----------|----------|------------|------------|-----------------|------------|---------|-----------|----------|
| rs5005274  | 11 | 98341301  | 0.4152 | 97.19% | 0.537700 | 0.338700 | 0.02450000 | 0.00301100 | ENST00000388171 | upstream   | 154827  | ---       | ---      |
| rs9320736  | 6  | 120425841 | 0.4152 | 97.19% | 0.804500 | 0.749900 | 0.02450000 | 0.01722000 | NM_005907       | upstream   | 713216  | Hs.102788 | MAN1A1   |
| rs10484007 | 14 | 88452101  | 0.1920 | 96.84% | 0.250300 | 0.278800 | 0.02453000 | 0.20550000 | NM_198310       | downstream | 38014   | Hs.303055 | TTC8     |
| rs4688360  | 3  | 63008489  | 0.1920 | 96.84% | 0.078140 | 0.130300 | 0.02453000 | 0.26290000 | NM_183393       | upstream   | 172395  | Hs.654933 | CADPS    |
| rs7179625  | 15 | 93984042  | 0.2210 | 96.84% | 0.293600 | 0.112800 | 0.02453000 | 0.04217000 | ENST00000365127 | upstream   | 105995  | ---       | ---      |
| rs4112338  | 9  | 117077093 | 0.0708 | 84.21% | 1.000000 | 1.000000 | 0.02454000 | 0.07664000 | NM_017418       | intron     | 0       | Hs.148841 | 01.Dec   |
| rs10498813 | 6  | 56792678  | 0.1277 | 97.54% | 1.000000 | 0.770500 | 0.02455000 | 0.03488000 | NM_020388       | intron     | 0       | Hs.631992 | DST      |
| rs1075013  | 7  | 90125440  | 0.3642 | 92.98% | 0.506800 | 0.082540 | 0.02455000 | 0.05297000 | ENST00000306129 | intron     | 0       | ---       | ---      |
| rs10492061 | 12 | 4861546   | 0.3333 | 97.89% | 0.282700 | 0.592800 | 0.02456000 | 0.03374000 | NM_000217       | upstream   | 29260   | Hs.416139 | KCNA1    |
| rs6953623  | 7  | 31695505  | 0.1310 | 95.09% | 1.000000 | 1.000000 | 0.02456000 | 0.08125000 | NM_006658       | intron     | 0       | Hs.227011 | C7orf16  |
| rs2120091  | 4  | 85756849  | 0.4101 | 97.54% | 0.536900 | 0.632100 | 0.02459000 | 0.07766000 | NM_001263       | intron     | 0       | Hs.654899 | CDS1     |
| rs720080   | 6  | 163442734 | 0.0159 | 88.07% | 1.000000 | 1.000000 | 0.02459000 | 0.05902000 | NM_152410       | intron     | 0       | Hs.25791  | PACRG    |
| rs10483432 | 14 | 32751756  | 0.4341 | 95.79% | 0.538800 | 0.360700 | 0.02464000 | 0.05627000 | NM_022123       | intron     | 0       | Hs.659456 | NPAS3    |
| rs4671265  | 2  | 56028148  | 0.1957 | 88.77% | 0.688600 | 1.000000 | 0.02464000 | 0.03578000 | NM_001039349    | upstream   | 25439   | Hs.76224  | EFEMP1   |
| rs10483364 | 14 | 30265621  | 0.1550 | 95.09% | 0.352300 | 0.316200 | 0.02465000 | 0.13150000 | NM_182835       | intron     | 0       | Hs.369168 | SCFD1    |
| rs10500382 | 16 | 12065713  | 0.4241 | 90.18% | 0.522900 | 0.438800 | 0.02467000 | 0.08808000 | NM_032167       | downstream | 11071   | Hs.458401 | RUND2C2A |
| rs2274185  | 1  | 158587804 | 0.0630 | 94.74% | 1.000000 | 1.000000 | 0.02467000 | 0.21190000 | NM_015331       | intron     | 0       | Hs.517249 | NCSTN    |
| rs1071882  | 5  | 178068646 | 0.2724 | 94.04% | 0.644900 | 0.724100 | 0.02468000 | 0.12740000 | NM_005649       | downstream | 2491    | Hs.484324 | ZNF354A  |
| rs543740   | 11 | 84468782  | 0.3346 | 91.23% | 0.782000 | 1.000000 | 0.02468000 | 0.15910000 | ENST00000376104 | intron     | 0       | ---       | ---      |
| rs10503331 | 8  | 5528064   | 0.0279 | 94.39% | 0.181800 | 0.235800 | 0.02470000 | 0.11290000 | ENST00000363751 | downstream | 227782  | ---       | ---      |
| rs7741833  | 6  | 121042746 | 0.4604 | 79.65% | 0.007845 | 0.134300 | 0.02470000 | 0.04620000 | ENST00000363440 | upstream   | 6721    | ---       | ---      |
| rs10515327 | 5  | 101991415 | 0.2732 | 94.39% | 0.127100 | 0.216300 | 0.02472000 | 0.10960000 | NM_173488       | upstream   | 128825  | Hs.388874 | SLCO6A1  |
| rs6560414  | 9  | 76660881  | 0.3802 | 93.68% | 0.155400 | 0.313100 | 0.02473000 | 0.01796000 | NM_017662       | intron     | 0       | Hs.272225 | TRPM6    |
| rs2916707  | 8  | 6197122   | 0.1591 | 92.63% | 0.257100 | 0.612900 | 0.02474000 | 0.05164000 | NM_024596       | upstream   | 54408   | Hs.656769 | MCPH1    |
| rs6891270  | 5  | 165966509 | 0.2063 | 94.39% | 0.457200 | 0.836700 | 0.02474000 | 0.01576000 | ENST00000320147 | downstream | 224322  | ---       | ---      |
| rs1911291  | 10 | 67976820  | 0.0571 | 89.12% | 0.186400 | 1.000000 | 0.02475000 | 0.02241000 | NM_013266       | intron     | 0       | Hs.660362 | CTNNA3   |
| rs7680105  | 4  | 147727101 | 0.1300 | 97.19% | 1.000000 | 0.697700 | 0.02475000 | 0.02609000 | NM_004575       | upstream   | 52437   | Hs.266    | POU4F2   |
| rs10508529 | 10 | 17504371  | 0.0278 | 94.74% | 0.181100 | 0.234600 | 0.02476000 | 0.04707000 | NM_001004470    | intron     | 0       | Hs.677766 | ST8SLA6  |
| rs1112401  | 7  | 151299255 | 0.2176 | 97.54% | 0.295600 | 0.420000 | 0.02481000 | 0.03551000 | NM_145292       | intron     | 0       | Hs.647077 | GALNTL5  |
| rs9293488  | 5  | 87103437  | 0.0762 | 94.39% | 0.656200 | 1.000000 | 0.02481000 | 0.01735000 | NM_153354       | downstream | 423344  | Hs.379972 | TMEM161B |
| rs9300791  | 13 | 102626893 | 0.3455 | 96.49% | 0.593800 | 0.426600 | 0.02483000 | 0.09291000 | NM_000452       | upstream   | 109696  | Hs.194783 | SLC10A2  |
| rs10490071 | 2  | 60522394  | 0.1685 | 97.89% | 0.086770 | 0.055910 | 0.02485000 | 0.14490000 | NM_138553       | downstream | 9412    | ---       | BCL11A   |
| rs2460401  | 2  | 7070780   | 0.1880 | 82.11% | 0.201800 | 0.349900 | 0.02486000 | 0.04594000 | NM_014746       | intron     | 0       | Hs.699230 | RNF144A  |
| rs1553273  | 4  | 101706843 | 0.1697 | 97.19% | 0.393100 | 0.634100 | 0.02487000 | 0.02240000 | NM_016242       | upstream   | 48641   | Hs.152913 | EMCN     |
| rs1962150  | 7  | 115664896 | 0.1272 | 97.89% | 0.177400 | 0.246300 | 0.02487000 | 0.01833000 | NM_152829       | intron     | 0       | Hs.592286 | TES      |
| rs9319686  | 18 | 60628256  | 0.2090 | 94.04% | 0.136900 | 0.207100 | 0.02489000 | 0.02371000 | ENST00000363325 | upstream   | 260533  | ---       | ---      |
| rs431370   | 4  | 31056923  | 0.4163 | 83.86% | 1.000000 | 0.497900 | 0.02490000 | 0.09119000 | NM_032457       | downstream | 303354  | Hs.570785 | PCDH7    |
| rs952251   | 11 | 12406813  | 0.4632 | 90.53% | 0.003918 | 0.084770 | 0.02491000 | 0.02285000 | NM_018222       | intron     | 0       | Hs.607144 | PARVA    |
| rs1029494  | 7  | 80774410  | 0.0591 | 97.89% | 0.608900 | 1.000000 | 0.02494000 | 0.03757000 | NM_006379       | upstream   | 387807  | Hs.269109 | SEMA3C   |
| rs10501922 | 11 | 99118908  | 0.2395 | 92.28% | 0.736500 | 0.646800 | 0.02494000 | 0.01143000 | NM_175566       | upstream   | 76565   | Hs.656783 | CNTN5    |
| rs1897049  | 15 | 52255958  | 0.0591 | 97.89% | 0.608900 | 1.000000 | 0.02494000 | 0.00762300 | ENST00000260323 | upstream   | 58563   | ---       | ---      |
| rs709243   | 12 | 91203275  | 0.0591 | 97.89% | 1.000000 | 1.000000 | 0.02494000 | 0.08231000 | NM_001025232    | downstream | 134726  | Hs.551199 | CLLU10S  |
| rs10511619 | 9  | 16414985  | 0.3519 | 94.74% | 0.061360 | 0.034440 | 0.02497000 | 0.00643500 | NM_017637       | intron     | 0       | Hs.656581 | BNC2     |
| rs2378502  | 3  | 190786405 | 0.4273 | 96.49% | 0.901900 | 0.544100 | 0.02501000 | 0.05663000 | NM_003722       | upstream   | 45505   | Hs.137569 | TP63     |
| rs2033015  | 2  | 56556375  | 0.4140 | 97.89% | 0.621700 | 0.879900 | 0.02502000 | 0.01279000 | NM_006296       | upstream   | 1570849 | Hs.631890 | VRK2     |
| rs332148   | 10 | 28911251  | 0.1059 | 89.47% | 0.175000 | 0.149100 | 0.02502000 | 0.00987200 | NM_100486       | intron     | 0       | Hs.435610 | WAC      |
| rs7475474  | 10 | 122419759 | 0.4140 | 97.89% | 0.805100 | 1.000000 | 0.02502000 | 0.01678000 | NM_001012711    | downstream | 70149   | ---       | C10orf85 |
| rs1916818  | 7  | 22863400  | 0.0269 | 97.89% | 1.000000 | 1.000000 | 0.02503000 | 0.00435400 | NM_019059       | upstream   | 34454   | Hs.112318 | TOMM7    |
| rs3734590  | 6  | 7960719   | 0.1790 | 95.09% | 0.539500 | 0.248600 | 0.02503000 | 0.02864000 | NM_022085       | intron     | 0       | Hs.150837 | TXNDC5   |
| rs2861785  | 2  | 79453958  | 0.1185 | 94.74% | 0.555000 | 1.000000 | 0.02504000 | 0.10840000 | NM_138937       | upstream   | 213571  | Hs.567312 | REG3A    |
| rs9297611  | 8  | 121139152 | 0.0286 | 91.93% | 1.000000 | 1.000000 | 0.02505000 | 0.03619000 | NM_022783       | downstream | 7215    | Hs.112981 | DEPDC6   |
| rs1503420  | 11 | 121071107 | 0.0441 | 91.58% | 0.078610 | 0.099800 | 0.02506000 | 0.16070000 | NM_003105       | downstream | 65510   | Hs.368592 | SORL1    |
| rs236877   | 6  | 79362203  | 0.3509 | 96.49% | 0.791300 | 0.874400 | 0.02507000 | 0.04339000 | NM_001010844    | upstream   | 271705  | Hs.656212 | IRAK1BP1 |
| rs362341   | 14 | 72711211  | 0.0333 | 94.74% | 0.028280 | 0.040480 | 0.02507000 | 0.10770000 | NM_000021       | intron     | 0       | Hs.592324 | PSEN1    |

|            |    |           |        |        |          |          |            |            |                 |            |         |           |           |
|------------|----|-----------|--------|--------|----------|----------|------------|------------|-----------------|------------|---------|-----------|-----------|
| rs10484417 | 6  | 67185952  | 0.0108 | 97.19% | 0.026980 | 1.000000 | 0.02508000 | 0.10380000 | ENST00000365187 | downstream | 309503  | ---       | ---       |
| rs2548261  | 5  | 100155146 | 0.4038 | 92.98% | 0.799700 | 0.627200 | 0.02512000 | 0.06655000 | NM_175052       | downstream | 18110   | Hs.308628 | ST8SIA4   |
| rs989433   | 21 | 38705678  | 0.2037 | 94.74% | 0.004667 | 0.000203 | 0.02515000 | 0.03009000 | NM_004449       | intron     | 0       | Hs.473819 | ERG       |
| rs10518015 | 4  | 67511540  | 0.1208 | 94.39% | 0.083460 | 0.213700 | 0.02516000 | 0.03449000 | ENST00000383902 | downstream | 466365  | ---       | ---       |
| rs2034683  | 16 | 16913349  | 0.1521 | 84.21% | 0.616600 | 0.786100 | 0.02516000 | 0.08566000 | ENST00000381510 | downstream | 184210  | ---       | ---       |
| rs3858021  | 9  | 10854239  | 0.2945 | 96.49% | 0.664400 | 0.169900 | 0.02517000 | 0.01431000 | ENST00000363183 | downstream | 1421887 | ---       | ---       |
| rs149467   | 3  | 3016819   | 0.1806 | 92.28% | 1.000000 | 0.644900 | 0.02518000 | 0.17150000 | NM_175613       | intron     | 0       | Hs.298705 | CNTN4     |
| rs10499777 | 7  | 63618238  | 0.0562 | 90.53% | 0.181800 | 1.000000 | 0.02519000 | 0.07741000 | NM_178558       | 3UTR       | 0       | Hs.520886 | ZNF680    |
| rs2743868  | 6  | 15733787  | 0.4519 | 83.86% | 0.067300 | 0.415200 | 0.02522000 | 0.11740000 | NM_183041       | intron     | 0       | Hs.571148 | DTNBP1    |
| rs7116734  | 11 | 120957150 | 0.3417 | 97.54% | 0.023650 | 0.037250 | 0.02524000 | 0.04893000 | NM_003105       | intron     | 0       | Hs.368592 | SORL1     |
| rs859362   | 1  | 173761713 | 0.1190 | 94.39% | 1.000000 | 0.374300 | 0.02524000 | 0.04588000 | ENST00000367674 | intron     | 0       | ---       | ---       |
| rs1032701  | 3  | 193231892 | 0.3569 | 89.47% | 0.496400 | 0.745200 | 0.02525000 | 0.07299000 | ENST00000364513 | upstream   | 61713   | ---       | ---       |
| rs861092   | 3  | 196179309 | 0.1703 | 97.89% | 1.000000 | 0.761300 | 0.02527000 | 0.04840000 | NM_152531       | downstream | 91310   | Hs.478741 | C3orf21   |
| rs10504321 | 8  | 61975455  | 0.0618 | 93.68% | 1.000000 | 1.000000 | 0.02531000 | 0.03519000 | NM_017780       | downstream | 33438   | Hs.20395  | CHD7      |
| rs10517254 | 4  | 32247093  | 0.0323 | 97.89% | 1.000000 | 1.000000 | 0.02531000 | 0.00291300 | NM_032457       | downstream | 1493524 | Hs.570785 | PCDH7     |
| rs10520231 | 2  | 79149887  | 0.0323 | 97.89% | 0.246600 | 0.295700 | 0.02531000 | 0.03186000 | NM_006507       | downstream | 15772   | Hs.4158   | REG1B     |
| rs3773559  | 3  | 55037455  | 0.0768 | 93.68% | 1.000000 | 1.000000 | 0.02534000 | 0.02746000 | NM_018398       | intron     | 0       | Hs.656687 | CACNA2D3  |
| rs10501851 | 11 | 95676492  | 0.1935 | 97.89% | 0.179300 | 0.010960 | 0.02535000 | 0.02703000 | NM_024725       | downstream | 49097   | Hs.525088 | CCDC82    |
| rs10488112 | 7  | 10095101  | 0.0759 | 94.74% | 0.655400 | 0.433500 | 0.02537000 | 0.00418500 | ENST00000387411 | upstream   | 133848  | ---       | ---       |
| rs1392265  | 3  | 119283235 | 0.2555 | 96.14% | 1.000000 | 0.712700 | 0.02537000 | 0.11830000 | NM_001015887    | downstream | 820456  | Hs.112873 | IGSF11    |
| rs10483412 | 14 | 32130473  | 0.3951 | 93.68% | 0.161100 | 0.255100 | 0.02539000 | 0.01417000 | NM_004274       | intron     | 0       | Hs.509083 | AKAP6     |
| rs873595   | 3  | 191000572 | 0.1816 | 93.68% | 0.038460 | 0.139200 | 0.02540000 | 0.01269000 | NM_003722       | intron     | 0       | Hs.137569 | TP63      |
| rs10515851 | 5  | 162584264 | 0.0594 | 97.54% | 0.060240 | 0.264800 | 0.02541000 | 0.21360000 | NM_199246       | upstream   | 212891  | Hs.79101  | CCNG1     |
| rs10515852 | 5  | 162588042 | 0.0594 | 97.54% | 0.244300 | 0.264800 | 0.02541000 | 0.29870000 | NM_199246       | upstream   | 209113  | Hs.79101  | CCNG1     |
| rs4845116  | 1  | 204839376 | 0.2033 | 86.32% | 0.243300 | 0.375400 | 0.02542000 | 0.01954000 | NM_006893       | intron     | 0       | Hs.497581 | LGTN      |
| rs10518013 | 4  | 67282795  | 0.1389 | 94.74% | 0.317000 | 0.580000 | 0.02545000 | 0.06584000 | ENST00000339867 | downstream | 639958  | ---       | ---       |
| rs10495173 | 1  | 219889502 | 0.3694 | 94.04% | 0.151300 | 0.606800 | 0.02547000 | 0.10540000 | NM_144729       | downstream | 51887   | Hs.497822 | DUSP10    |
| rs2366160  | 11 | 113830940 | 0.3522 | 96.14% | 0.113000 | 0.387400 | 0.02549000 | 0.01655000 | NM_015523       | downstream | 4729    | Hs.7527   | REXO2     |
| rs1824306  | 2  | 71260077  | 0.1487 | 97.89% | 0.475200 | 1.000000 | 0.02550000 | 0.10580000 | NM_005791       | downstream | 29339   | Hs.656208 | MPHOSPH10 |
| rs9321616  | 6  | 137882761 | 0.1394 | 94.39% | 0.318800 | 0.470200 | 0.02550000 | 0.01723000 | NM_175747       | upstream   | 25681   | Hs.195398 | OLIG3     |
| rs2270653  | 4  | 78160406  | 0.1033 | 95.09% | 0.750300 | 0.608900 | 0.02551000 | 0.00425900 | NM_018243       | intron     | 0       | Hs.128199 | 11.Sep    |
| rs889962   | 2  | 21699691  | 0.0634 | 94.04% | 1.000000 | 1.000000 | 0.02551000 | 0.04029000 | ENST00000383859 | upstream   | 299679  | ---       | ---       |
| rs4755765  | 11 | 33599949  | 0.3921 | 84.56% | 0.000674 | 0.023280 | 0.02556000 | 0.05141000 | ENST00000389726 | intron     | 0       | ---       | ---       |
| rs362355   | 14 | 72707714  | 0.0352 | 94.74% | 0.279600 | 0.338300 | 0.02558000 | 0.06387000 | NM_000021       | intron     | 0       | Hs.592324 | PSEN1     |
| rs10514462 | 16 | 78146415  | 0.0344 | 96.84% | 0.274300 | 0.330200 | 0.02559000 | 0.08500000 | NM_001031804    | downstream | 39321   | Hs.134859 | MAF       |
| rs2306129  | 8  | 99174902  | 0.3885 | 94.39% | 0.523600 | 0.757400 | 0.02560000 | 0.00420800 | NM_173549       | 3UTR       | 0       | Hs.171455 | C8orf47   |
| rs2023124  | 8  | 123403249 | 0.1365 | 95.09% | 0.438000 | 0.134100 | 0.02562000 | 0.04122000 | NM_005328       | upstream   | 680438  | Hs.571528 | HAS2      |
| rs723416   | 21 | 19428994  | 0.1365 | 95.09% | 0.438000 | 0.702300 | 0.02562000 | 0.01534000 | NM_203430       | downstream | 276343  | ---       | PPIA      |
| rs10497242 | 2  | 164287000 | 0.0975 | 97.19% | 0.156700 | 0.274800 | 0.02564000 | 0.02835000 | NM_018086       | intron     | 0       | Hs.593650 | FIGN      |
| rs2029250  | 1  | 192520743 | 0.0341 | 97.89% | 0.271700 | 0.328600 | 0.02564000 | 0.10570000 | ENST00000385495 | downstream | 203113  | ---       | ---       |
| rs347236   | 5  | 72898045  | 0.2458 | 83.51% | 1.000000 | 0.633300 | 0.02564000 | 0.02655000 | NM_032175       | intron     | 0       | Hs.406703 | UTP15     |
| rs10248833 | 7  | 24787486  | 0.2037 | 94.74% | 1.000000 | 0.672700 | 0.02566000 | 0.11800000 | NM_145321       | downstream | 15205   | Hs.520259 | OSBPL3    |
| rs758113   | 17 | 10839468  | 0.1004 | 96.14% | 0.742000 | 1.000000 | 0.02567000 | 0.02038000 | ENST00000362504 | upstream   | 109041  | ---       | ---       |
| rs2613671  | 8  | 21083065  | 0.4375 | 84.21% | 0.432400 | 0.429800 | 0.02568000 | 0.06992000 | ENST00000387614 | upstream   | 417187  | ---       | ---       |
| rs1400593  | 12 | 116535961 | 0.0614 | 97.19% | 0.269000 | 0.290900 | 0.02569000 | 0.05897000 | NM_173598       | intron     | 0       | Hs.375836 | KSR2      |
| rs10509744 | 10 | 102261569 | 0.2342 | 94.39% | 1.000000 | 1.000000 | 0.02570000 | 0.25260000 | NM_015490       | intron     | 0       | Hs.18889  | SEC31B    |
| rs2955529  | 12 | 23900409  | 0.3510 | 89.47% | 0.001559 | 0.002983 | 0.02570000 | 0.11830000 | NM_178010       | intron     | 0       | Hs.657542 | SOX5      |
| rs5007492  | 18 | 21662551  | 0.3815 | 94.74% | 0.155700 | 0.619400 | 0.02570000 | 0.04900000 | NM_005637       | downstream | 187666  | Hs.404263 | SS18      |
| rs6795120  | 3  | 59414325  | 0.4301 | 97.89% | 0.903400 | 0.347200 | 0.02570000 | 0.01610000 | NM_002012       | downstream | 298667  | Hs.655995 | FHIT      |
| rs719125   | 2  | 201726105 | 0.2011 | 95.09% | 0.059320 | 0.130900 | 0.02571000 | 0.04929000 | NM_003879       | intron     | 0       | Hs.390736 | CFLAR     |
| rs3738367  | 1  | 222775211 | 0.2239 | 90.88% | 0.006558 | 0.067220 | 0.02572000 | 0.02666000 | NM_025160       | upstream   | 86587   | Hs.497873 | WDR26     |
| rs10495850 | 2  | 35991005  | 0.0541 | 94.04% | 0.550900 | 0.206400 | 0.02575000 | 0.09629000 | NM_016441       | upstream   | 445568  | Hs.699247 | CRIM1     |
| rs10511388 | 3  | 120550403 | 0.0466 | 86.67% | 0.010330 | 0.014100 | 0.02575000 | 0.07889000 | NM_020754       | intron     | 0       | Hs.657263 | CDGAP     |
| rs2141610  | 3  | 190784288 | 0.2315 | 94.74% | 0.732800 | 1.000000 | 0.02575000 | 0.00830500 | NM_198485       | downstream | 260324  | Hs.338851 | FAM79B    |

|            |    |           |        |        |          |          |            |            |                 |            |         |           |           |
|------------|----|-----------|--------|--------|----------|----------|------------|------------|-----------------|------------|---------|-----------|-----------|
| rs2465762  | 11 | 106423462 | 0.1942 | 97.54% | 1.000000 | 1.000000 | 0.02575000 | 0.00487600 | NM_000855       | upstream   | 29081   | Hs.654555 | GUCY1A2   |
| rs3912622  | 11 | 102626683 | 0.1982 | 96.49% | 0.851300 | 1.000000 | 0.02575000 | 0.10790000 | ENST00000334267 | intron     | 0       | ---       | ---       |
| rs149352   | 5  | 94224367  | 0.2809 | 93.68% | 0.022230 | 0.104000 | 0.02576000 | 0.05903000 | NM_001002796    | intron     | 0       | Hs.655087 | MCTP1     |
| rs565398   | 11 | 91858879  | 0.2774 | 92.98% | 0.541000 | 0.721300 | 0.02576000 | 0.05556000 | ENST00000298047 | intron     | 0       | ---       | ---       |
| rs10489834 | 1  | 156787658 | 0.4265 | 97.89% | 0.179500 | 0.209800 | 0.02578000 | 0.10380000 | NM_001005189    | upstream   | 3139    | Hs.553780 | OR6Y1     |
| rs10507046 | 12 | 93777538  | 0.4129 | 92.63% | 0.899000 | 0.285000 | 0.02578000 | 0.01644000 | NM_018838       | downstream | 111702  | Hs.506374 | NDUFA12   |
| rs1343945  | 13 | 30380241  | 0.4265 | 97.89% | 0.542000 | 0.531100 | 0.02578000 | 0.05183000 | NM_032849       | intron     | 0       | Hs.646647 | C13orf33  |
| rs192166   | 5  | 130880424 | 0.3232 | 92.28% | 0.007530 | 0.057900 | 0.02579000 | 0.01967000 | NM_016340       | intron     | 0       | Hs.483329 | RAPGEF6   |
| rs801739   | 11 | 65679165  | 0.4927 | 96.14% | 0.011300 | 0.050030 | 0.02580000 | 0.07739000 | NM_018026       | intron     | 0       | Hs.644326 | PACS1     |
| rs10514280 | 5  | 85744155  | 0.2108 | 94.04% | 0.855100 | 1.000000 | 0.02583000 | 0.01079000 | NM_001867       | upstream   | 205322  | Hs.430075 | COX7C     |
| rs1955544  | 14 | 39844441  | 0.1960 | 97.54% | 0.125200 | 0.198200 | 0.02587000 | 0.08662000 | NM_203301       | upstream   | 873070  | Hs.324342 | FBXO33    |
| rs9308191  | 4  | 146805664 | 0.2637 | 95.79% | 0.876300 | 0.523100 | 0.02587000 | 0.01177000 | NM_172250       | downstream | 6371    | Hs.452864 | MMAA      |
| rs10512394 | 9  | 111269044 | 0.1880 | 82.11% | 0.829800 | 0.537200 | 0.02590000 | 0.04522000 | NM_002829       | intron     | 0       | Hs.436429 | PTPN3     |
| rs574522   | 1  | 193212122 | 0.2299 | 96.14% | 0.394500 | 1.000000 | 0.02590000 | 0.02837000 | NM_198503       | downstream | 1249414 | Hs.657046 | KCNT2     |
| rs6003160  | 22 | 42061618  | 0.3229 | 95.09% | 0.486900 | 0.855900 | 0.02590000 | 0.02054000 | NM_173050       | intron     | 0       | Hs.133995 | SCUBE1    |
| rs669143   | 11 | 109238959 | 0.0443 | 95.09% | 1.000000 | 1.000000 | 0.02591000 | 0.12060000 | NM_207645       | downstream | 437341  | Hs.172982 | LOC399947 |
| rs6433083  | 2  | 169207560 | 0.2890 | 92.28% | 0.016610 | 0.008746 | 0.02595000 | 0.05649000 | NM_203463       | intron     | 0       | Hs.506829 | LASS6     |
| rs962586   | 13 | 96859208  | 0.1794 | 87.02% | 0.004228 | 0.001650 | 0.02596000 | 0.02739000 | NM_207304       | downstream | 16943   | Hs.657347 | MBNL2     |
| rs10488165 | 7  | 132788184 | 0.4422 | 97.19% | 0.714700 | 1.000000 | 0.02597000 | 0.07442000 | NM_001037126    | intron     | 0       | Hs.321273 | EXOC4     |
| rs10497288 | 2  | 167084851 | 0.0989 | 97.54% | 1.000000 | 1.000000 | 0.02597000 | 0.02553000 | NM_002976       | upstream   | 33124   | Hs.695947 | SCN7A     |
| rs10503006 | 18 | 51720427  | 0.0426 | 94.74% | 0.386800 | 0.433500 | 0.02597000 | 0.12170000 | NM_001039759    | downstream | 126642  | ---       | FLJ45743  |
| rs292432   | 11 | 30692095  | 0.0444 | 94.74% | 1.000000 | 1.000000 | 0.02597000 | 0.05128000 | NM_001584       | upstream   | 126982  | Hs.289795 | MPPED2    |
| rs7500906  | 16 | 48354332  | 0.4691 | 96.49% | 0.184400 | 0.230000 | 0.02598000 | 0.00644400 | NM_015069       | intron     | 0       | Hs.530930 | ZNF423    |
| rs9318756  | 13 | 80700407  | 0.4057 | 92.98% | 0.610100 | 0.215400 | 0.02599000 | 0.01287000 | ENST00000387380 | upstream   | 37476   | ---       | ---       |
| rs10498023 | 2  | 215369955 | 0.0612 | 97.54% | 0.070450 | 0.076000 | 0.02602000 | 0.03592000 | NM_000465       | intron     | 0       | Hs.591642 | BARD1     |
| rs1986631  | 9  | 72282280  | 0.4157 | 87.37% | 0.037450 | 0.138400 | 0.02602000 | 0.06802000 | NM_001007471    | downstream | 57508   | Hs.47288  | TRPM3     |
| rs2079437  | 7  | 28886197  | 0.0424 | 95.09% | 0.385600 | 0.121800 | 0.02602000 | 0.19010000 | NM_001011666    | downstream | 54161   | Hs.437075 | CREB5     |
| rs1504037  | 3  | 6137218   | 0.0623 | 95.79% | 1.000000 | 1.000000 | 0.02603000 | 0.09464000 | NM_181875       | upstream   | 740858  | ---       | GRM7      |
| rs6994971  | 8  | 91924984  | 0.4854 | 96.14% | 0.117400 | 0.168400 | 0.02605000 | 0.09255000 | NM_022351       | intron     | 0       | Hs.560892 | NECAB1    |
| rs2403590  | 11 | 20362222  | 0.2453 | 93.68% | 1.000000 | 0.822500 | 0.02611000 | 0.01624000 | NM_006410       | downstream | 318     | Hs.90753  | HTATIP2   |
| rs10511980 | 9  | 71928159  | 0.3875 | 95.09% | 0.040120 | 0.093530 | 0.02612000 | 0.05004000 | NM_153267       | intron     | 0       | Hs.547172 | MAMDC2    |
| rs10513938 | 18 | 1577735   | 0.3409 | 84.91% | 0.062090 | 0.453700 | 0.02612000 | 0.01108000 | NM_022840       | downstream | 949795  | Hs.126888 | METTL4    |
| rs1482581  | 2  | 213467362 | 0.2920 | 91.93% | 0.653900 | 0.492100 | 0.02612000 | 0.06536000 | NM_016260       | downstream | 112227  | Hs.604950 | IKZF2     |
| rs2257086  | 6  | 116925713 | 0.2588 | 90.18% | 0.253600 | 0.574400 | 0.02612000 | 0.07643000 | ENST00000310560 | intron     | 0       | ---       | ---       |
| rs10510809 | 3  | 59414093  | 0.1953 | 97.89% | 0.187300 | 0.389100 | 0.02613000 | 0.01832000 | NM_002012       | downstream | 298899  | Hs.655995 | FHIT      |
| rs1288547  | 4  | 186453130 | 0.4513 | 97.19% | 0.627700 | 0.442800 | 0.02613000 | 0.00493800 | NM_031953       | intron     | 0       | Hs.369091 | SNX25     |
| rs1386037  | 12 | 114623756 | 0.1971 | 97.89% | 1.000000 | 1.000000 | 0.02613000 | 0.02006000 | ENST00000386460 | upstream   | 16151   | ---       | ---       |
| rs16934682 | 10 | 33942758  | 0.0357 | 93.33% | 0.283300 | 0.336600 | 0.02613000 | 0.03088000 | NM_001024629    | upstream   | 279302  | Hs.131704 | NRP1      |
| rs2085852  | 2  | 230630    | 0.2636 | 96.49% | 0.436600 | 1.000000 | 0.02613000 | 0.06482000 | NM_015677       | intron     | 0       | Hs.515951 | SH3YL1    |
| rs950136   | 14 | 29433812  | 0.1953 | 97.89% | 0.850100 | 1.000000 | 0.02613000 | 0.13270000 | NM_002742       | intron     | 0       | Hs.508999 | PRKD1     |
| rs2871668  | 3  | 96407708  | 0.4431 | 89.47% | 0.253000 | 0.114800 | 0.02614000 | 0.06919000 | ENST00000332119 | upstream   | 268150  | ---       | ---       |
| rs971434   | 6  | 110084001 | 0.3271 | 94.39% | 0.890400 | 0.870400 | 0.02614000 | 0.01558000 | NM_145025       | intron     | 0       | Hs.486169 | C6orf199  |
| rs994952   | 6  | 78319674  | 0.4649 | 84.91% | 0.052380 | 0.053990 | 0.02615000 | 0.05883000 | NM_000863       | upstream   | 89835   | Hs.123016 | HTR1B     |
| rs1948369  | 1  | 101711149 | 0.3569 | 96.84% | 0.693800 | 0.389500 | 0.02616000 | 0.08061000 | NM_001400       | downstream | 231487  | Hs.154210 | EDG1      |
| rs1923868  | 13 | 103620989 | 0.1022 | 96.14% | 0.176900 | 0.153800 | 0.02617000 | 0.04103000 | NM_000452       | upstream   | 1103792 | Hs.194783 | SLC10A2   |
| rs7576149  | 2  | 20789943  | 0.1053 | 93.33% | 0.749600 | 1.000000 | 0.02620000 | 0.03289000 | NM_021925       | intron     | 0       | Hs.187823 | C2orf43   |
| rs2174748  | 3  | 154521672 | 0.1275 | 89.47% | 0.575400 | 0.541000 | 0.02622000 | 0.04797000 | ENST00000383956 | upstream   | 121176  | ---       | ---       |
| rs4131049  | 10 | 124981594 | 0.3736 | 95.79% | 0.440700 | 0.615000 | 0.02622000 | 0.04302000 | NM_153442       | upstream   | 434267  | Hs.12751  | GPR26     |
| rs4665049  | 2  | 159817465 | 0.2918 | 90.18% | 0.009793 | 0.032080 | 0.02623000 | 0.01050000 | NM_152528       | intron     | 0       | Hs.20848  | WDSUB1    |
| rs4075701  | 2  | 116146260 | 0.1978 | 97.54% | 0.573100 | 0.593900 | 0.02624000 | 0.02658000 | NM_001004360    | intron     | 0       | Hs.591555 | DPP10     |
| rs1316575  | 6  | 54273259  | 0.4371 | 97.54% | 0.542000 | 0.278200 | 0.02625000 | 0.00152500 | NM_014464       | upstream   | 7903    | Hs.127011 | TINAG     |
| rs10483246 | 22 | 48069909  | 0.3007 | 96.84% | 0.886300 | 0.440500 | 0.02627000 | 0.02248000 | NM_207478       | upstream   | 258424  | ---       | FLJ44385  |
| rs10488082 | 7  | 29911394  | 0.1456 | 91.58% | 0.041460 | 0.268800 | 0.02627000 | 0.08621000 | ENST00000242140 | downstream | 526     | ---       | ---       |
| rs1631871  | 14 | 86545527  | 0.0360 | 92.63% | 0.002510 | 0.004064 | 0.02627000 | 0.04460000 | NM_001037525    | downstream | 923586  | Hs.513439 | GALC      |

|            |    |           |        |        |          |          |            |            |                 |            |         |           |          |
|------------|----|-----------|--------|--------|----------|----------|------------|------------|-----------------|------------|---------|-----------|----------|
| rs2024374  | 7  | 7725084   | 0.1505 | 97.89% | 0.003702 | 0.003013 | 0.02628000 | 0.00751000 | NM_002947       | upstream   | 321     | Hs.487540 | RPA3     |
| rs721424   | 20 | 20287310  | 0.4604 | 97.54% | 0.717400 | 1.000000 | 0.02629000 | 0.00603400 | NM_015585       | intron     | 0       | Hs.176013 | C20orf26 |
| rs10510057 | 10 | 121301038 | 0.2581 | 97.89% | 0.754400 | 0.830500 | 0.02630000 | 0.04889000 | NM_002925       | upstream   | 8826    | Hs.501200 | RGS10    |
| rs1349734  | 2  | 129987676 | 0.2581 | 97.89% | 0.436900 | 1.000000 | 0.02630000 | 0.02756000 | ENST00000385692 | downstream | 86110   | ---       | ---      |
| rs1513595  | 20 | 11600924  | 0.3533 | 96.84% | 0.693300 | 0.603700 | 0.02630000 | 0.12740000 | ENST00000318298 | upstream   | 63632   | ---       | ---      |
| rs9301634  | 13 | 89372499  | 0.2222 | 97.89% | 0.297200 | 0.812400 | 0.02630000 | 0.02062000 | ENST00000363863 | downstream | 85007   | ---       | ---      |
| rs6882495  | 5  | 57478580  | 0.2138 | 94.39% | 0.855700 | 0.838300 | 0.02633000 | 0.03768000 | NM_006622       | downstream | 306986  | Hs.398157 | PLK2     |
| rs2594480  | 2  | 79080378  | 0.2116 | 93.68% | 0.142600 | 0.126100 | 0.02634000 | 0.05555000 | NM_198448       | upstream   | 25956   | Hs.447084 | REG3G    |
| rs10516478 | 4  | 102610288 | 0.0352 | 94.74% | 1.000000 | 1.000000 | 0.02636000 | 0.05341000 | NM_000944       | upstream   | 122912  | Hs.435512 | PPP3CA   |
| rs10485927 | 7  | 78502422  | 0.0717 | 97.89% | 1.000000 | 1.000000 | 0.02639000 | 0.03241000 | NM_012301       | intron     | 0       | Hs.654788 | MAGI2    |
| rs1372705  | 9  | 17427735  | 0.3543 | 97.54% | 0.238300 | 0.636900 | 0.02639000 | 0.18070000 | NM_017738       | intron     | 0       | Hs.435381 | C9orf39  |
| rs6793392  | 3  | 43300839  | 0.4498 | 97.89% | 0.468100 | 0.881100 | 0.02642000 | 0.02153000 | NM_017719       | upstream   | 2195    | Hs.476052 | SNRK     |
| rs10504082 | 8  | 50426124  | 0.3569 | 96.84% | 0.434800 | 0.428700 | 0.02643000 | 0.07067000 | NM_018967       | upstream   | 1043202 | Hs.584914 | SNTG1    |
| rs961904   | 6  | 141324292 | 0.4361 | 93.33% | 0.710000 | 1.000000 | 0.02645000 | 0.14550000 | NM_006079       | upstream   | 1586814 | Hs.82071  | CITED2   |
| rs1397328  | 2  | 239233691 | 0.2220 | 90.88% | 0.029970 | 0.039780 | 0.02646000 | 0.01341000 | NM_001040445    | downstream | 213581  | Hs.516788 | ASB1     |
| rs232779   | 1  | 58899264  | 0.0907 | 94.74% | 0.251500 | 0.202100 | 0.02647000 | 0.05428000 | ENST00000294610 | intron     | 0       | ---       | ---      |
| rs9582457  | 13 | 100618459 | 0.2529 | 91.58% | 0.871200 | 0.576500 | 0.02647000 | 0.16180000 | NM_052867       | intron     | 0       | Hs.525146 | NALCN    |
| rs1957491  | 14 | 43379465  | 0.4373 | 97.89% | 0.903200 | 0.352800 | 0.02650000 | 0.06204000 | NM_152447       | downstream | 1935967 | Hs.136893 | LRFN5    |
| rs7795236  | 7  | 108046946 | 0.3012 | 90.88% | 0.554900 | 0.605700 | 0.02653000 | 0.02418000 | NM_012328       | downstream | 44416   | Hs.6790   | DNAJB9   |
| rs6941115  | 6  | 97336333  | 0.2890 | 92.28% | 0.293400 | 0.386200 | 0.02654000 | 0.18450000 | NM_030784       | downstream | 16312   | Hs.632612 | GPR63    |
| rs1921026  | 12 | 78188457  | 0.2815 | 94.74% | 0.132100 | 0.080100 | 0.02655000 | 0.03860000 | NM_005639       | intron     | 0       | Hs.310545 | SYT1     |
| rs10505077 | 8  | 106704679 | 0.0351 | 95.09% | 1.000000 | 1.000000 | 0.02656000 | 0.01629000 | NM_012082       | intron     | 0       | Hs.431009 | ZFPM2    |
| rs10520866 | 5  | 20576714  | 0.0351 | 95.09% | 1.000000 | 1.000000 | 0.02656000 | 0.04007000 | NM_004934       | upstream   | 552618  | Hs.317632 | CDH18    |
| rs3785214  | 16 | 7657122   | 0.4302 | 92.98% | 0.318200 | 0.541900 | 0.02656000 | 0.01611000 | NM_018723       | intron     | 0       | Hs.459842 | A2BP1    |
| rs9321772  | 6  | 140904839 | 0.4873 | 96.84% | 0.401100 | 0.655100 | 0.02656000 | 0.08014000 | NM_006079       | upstream   | 1167361 | Hs.82071  | CITED2   |
| rs10517898 | 4  | 167498959 | 0.0823 | 87.37% | 0.674000 | 0.437400 | 0.02657000 | 0.01712000 | NM_016950       | downstream | 392208  | Hs.481133 | SPOCK3   |
| rs1067332  | 2  | 44480476  | 0.3605 | 90.53% | 1.000000 | 0.730100 | 0.02658000 | 0.01364000 | NM_024766       | intron     | 0       | Hs.468349 | C2orf34  |
| rs4266352  | 4  | 109685796 | 0.1727 | 97.54% | 0.526800 | 0.814300 | 0.02660000 | 0.13080000 | NM_016269       | upstream   | 376769  | Hs.555947 | LEF1     |
| rs10518726 | 15 | 51610704  | 0.2004 | 97.19% | 0.137500 | 0.605200 | 0.02661000 | 0.03983000 | NM_182758       | intron     | 0       | Hs.122125 | WDR72    |
| rs931217   | 2  | 213204695 | 0.1057 | 92.98% | 0.053650 | 0.036280 | 0.02667000 | 0.15760000 | NM_001042599    | upstream   | 93196   | Hs.390729 | ERBB4    |
| rs7734364  | 5  | 142416345 | 0.4586 | 97.54% | 0.904100 | 0.654600 | 0.02668000 | 0.01686000 | NM_015071       | intron     | 0       | Hs.654668 | ARHGAP26 |
| rs10507727 | 13 | 65268708  | 0.2617 | 97.19% | 0.876600 | 0.832700 | 0.02669000 | 0.04155000 | NM_020403       | downstream | 506264  | Hs.654709 | PCDH9    |
| rs10494675 | 1  | 191417496 | 0.0399 | 83.51% | 0.003388 | 0.061810 | 0.02671000 | 0.04315000 | NM_003783       | intron     | 0       | Hs.518834 | B3GALT2  |
| rs1105244  | 2  | 66165727  | 0.1075 | 92.98% | 0.200900 | 0.171000 | 0.02673000 | 0.09324000 | NM_002398       | upstream   | 350309  | Hs.526754 | MEIS1    |
| rs2440359  | 15 | 50919088  | 0.1336 | 97.19% | 0.295550 | 0.155800 | 0.02674000 | 0.02509000 | NM_004498       | upstream   | 49587   | Hs.658573 | ONECUT1  |
| rs3798236  | 6  | 116416342 | 0.4601 | 83.51% | 0.151500 | 0.098870 | 0.02674000 | 0.12420000 | NM_002031       | intron     | 0       | Hs.89426  | FRK      |
| rs10490204 | 2  | 102422966 | 0.1654 | 93.33% | 1.000000 | 0.746900 | 0.02675000 | 0.11890000 | NM_003853       | intron     | 0       | Hs.158315 | IL18RAP  |
| rs10490910 | 10 | 118066445 | 0.1407 | 92.28% | 0.019940 | 0.172600 | 0.02675000 | 0.07121000 | NM_198515       | upstream   | 7485    | Hs.233407 | C10orf96 |
| rs6449674  | 5  | 63031694  | 0.4658 | 97.54% | 0.630400 | 0.647000 | 0.02675000 | 0.00436800 | NM_000524       | downstream | 260340  | Hs.247940 | HTR1A    |
| rs1335989  | 10 | 33104406  | 0.0866 | 97.19% | 0.133000 | 0.119200 | 0.02676000 | 0.04594000 | NM_024688       | intron     | 0       | Hs.585464 | C10orf68 |
| rs6692851  | 1  | 34119149  | 0.1056 | 94.74% | 0.193900 | 0.166000 | 0.02676000 | 0.02203000 | NM_052896       | intron     | 0       | Hs.656915 | CSMD2    |
| rs6982790  | 8  | 122777359 | 0.1056 | 94.74% | 0.749600 | 0.743800 | 0.02676000 | 0.06318000 | NM_005328       | upstream   | 54548   | Hs.571528 | HAS2     |
| rs10509471 | 10 | 84937402  | 0.3668 | 96.14% | 0.896700 | 0.865500 | 0.02677000 | 0.19750000 | ENST00000363904 | upstream   | 119595  | ---       | ---      |
| rs10494630 | 1  | 188370938 | 0.2975 | 97.89% | 1.000000 | 0.866100 | 0.02678000 | 0.03568000 | NM_199051       | intron     | 0       | Hs.65765  | FAM5C    |
| rs10520186 | 2  | 77541306  | 0.0932 | 92.28% | 0.057880 | 1.000000 | 0.02678000 | 0.04431000 | NM_024993       | intron     | 0       | Hs.285782 | LRRTM4   |
| rs10486616 | 7  | 33752103  | 0.3222 | 94.74% | 1.000000 | 1.000000 | 0.02679000 | 0.00384300 | ENST00000311067 | downstream | 17513   | ---       | ---      |
| rs4498221  | 5  | 54056959  | 0.2463 | 94.04% | 0.031610 | 0.572200 | 0.02679000 | 0.13610000 | NM_052870       | downstream | 205533  | Hs.432755 | SNAG1    |
| rs651661   | 11 | 84366176  | 0.3234 | 94.39% | 0.166600 | 0.137900 | 0.02680000 | 0.11930000 | ENST00000376104 | intron     | 0       | ---       | ---      |
| rs803262   | 7  | 91196798  | 0.2625 | 90.88% | 0.335200 | 0.202600 | 0.02680000 | 0.04553000 | NM_006980       | downstream | 143159  | Hs.532216 | MTERF    |
| rs2107472  | 7  | 8672612   | 0.2491 | 93.68% | 0.254600 | 0.452200 | 0.02681000 | 0.03640000 | NM_152745       | upstream   | 84551   | Hs.487564 | NXP1     |
| rs10490405 | 2  | 56565471  | 0.4928 | 96.84% | 0.717800 | 0.763300 | 0.02683000 | 0.00701700 | NM_006296       | upstream   | 1561753 | Hs.631890 | VRK2     |
| rs9308877  | 2  | 104709728 | 0.3658 | 95.44% | 0.360800 | 1.000000 | 0.02684000 | 0.02071000 | ENST00000384520 | upstream   | 6396    | ---       | ---      |
| rs10507729 | 13 | 65590973  | 0.1426 | 92.28% | 0.445200 | 0.243600 | 0.02687000 | 0.04522000 | NM_020403       | downstream | 183999  | Hs.654709 | PCDH9    |
| rs2423454  | 20 | 9667984   | 0.2608 | 97.54% | 0.042140 | 0.071310 | 0.02687000 | 0.01315000 | NM_177990       | intron     | 0       | Hs.32539  | PAK7     |

|            |    |           |        |        |          |          |            |            |                 |            |        |           |          |
|------------|----|-----------|--------|--------|----------|----------|------------|------------|-----------------|------------|--------|-----------|----------|
| rs4498548  | 8  | 122751374 | 0.0860 | 97.89% | 0.704700 | 0.697500 | 0.02687000 | 0.05538000 | NM_005328       | upstream   | 28563  | Hs.571528 | HAS2     |
| rs2798765  | 6  | 48609119  | 0.3077 | 82.11% | 0.020660 | 0.032340 | 0.02688000 | 0.01767000 | NM_207499       | upstream   | 464820 | ---       | C6orf138 |
| rs4908004  | 1  | 99926262  | 0.1084 | 92.28% | 0.521700 | 1.000000 | 0.02688000 | 0.05776000 | NM_017734       | intron     | 0      | Hs.483993 | PALMD    |
| rs1364516  | 7  | 132017402 | 0.4819 | 97.19% | 0.117800 | 0.450800 | 0.02689000 | 0.06302000 | NM_181775       | upstream   | 33415  | Hs.675491 | PLXNA4   |
| rs2076756  | 16 | 49314382  | 0.1630 | 94.74% | 0.260500 | 0.805700 | 0.02689000 | 0.02751000 | NM_022162       | intron     | 0      | Hs.592072 | NOD2     |
| rs3891298  | 3  | 64219964  | 0.0719 | 97.54% | 0.156000 | 0.397700 | 0.02689000 | 0.06036000 | NM_198859       | upstream   | 33793  | Hs.699317 | PRICKLE2 |
| rs10498098 | 2  | 221337878 | 0.0845 | 97.54% | 0.116300 | 1.000000 | 0.02690000 | 0.01652000 | ENST00000385336 | downstream | 231306 | ---       | ---      |
| rs10516579 | 4  | 112902972 | 0.0655 | 93.68% | 0.090170 | 1.000000 | 0.02690000 | 0.08660000 | NM_152400       | upstream   | 383155 | Hs.23439  | C4orf32  |
| rs1113253  | 10 | 57300806  | 0.0866 | 97.19% | 1.000000 | 1.000000 | 0.02690000 | 0.06163000 | NM_001005414    | downstream | 486805 | ---       | ZWINT    |
| rs1323154  | 13 | 42872326  | 0.4712 | 97.54% | 0.053810 | 0.222100 | 0.02693000 | 0.03377000 | NM_017993       | intron     | 0      | Hs.128258 | ENOX1    |
| rs7512592  | 1  | 156756569 | 0.4819 | 96.84% | 0.116600 | 0.445400 | 0.02697000 | 0.24510000 | NM_001005189    | downstream | 26973  | Hs.553780 | OR6Y1    |
| rs10517409 | 4  | 37038537  | 0.0737 | 97.54% | 1.000000 | 1.000000 | 0.02698000 | 0.01221000 | ENST00000389006 | intron     | 0      | ---       | ---      |
| rs10513835 | 3  | 190517515 | 0.1624 | 95.09% | 0.375900 | 0.459000 | 0.02699000 | 0.00989800 | NM_198485       | intron     | 0      | Hs.338851 | FAM79B   |
| rs10501899 | 11 | 98419726  | 0.1757 | 96.84% | 0.034820 | 0.034940 | 0.02700000 | 0.01242000 | ENST00000388171 | upstream   | 76402  | ---       | ---      |
| rs1464077  | 1  | 225520842 | 0.1071 | 93.33% | 0.749500 | 0.743100 | 0.02700000 | 0.01048000 | NM_003607       | intron     | 0      | Hs.35433  | CDC42BPA |
| rs2001486  | 17 | 9705256   | 0.4079 | 93.33% | 0.374000 | 0.143700 | 0.02701000 | 0.02665000 | NM_004246       | intron     | 0      | Hs.248202 | GLP2R    |
| rs159863   | 1  | 80188802  | 0.0223 | 94.39% | 0.117800 | 1.000000 | 0.02702000 | 0.33240000 | ENST00000294631 | upstream   | 943852 | ---       | ---      |
| rs6987004  | 8  | 34643545  | 0.2318 | 96.14% | 0.040540 | 0.356500 | 0.02703000 | 0.09218000 | NM_080872       | upstream   | 877907 | Hs.238889 | UNC5D    |
| rs1013186  | 9  | 100924158 | 0.1870 | 94.74% | 0.316400 | 0.261800 | 0.02704000 | 0.01900000 | NM_004612       | intron     | 0      | Hs.494622 | TGFBR1   |
| rs1367590  | 7  | 136630389 | 0.4946 | 97.54% | 0.093960 | 0.291500 | 0.02705000 | 0.03636000 | NM_002825       | intron     | 0      | Hs.371249 | PTN      |
| rs10496656 | 2  | 126830142 | 0.0735 | 97.89% | 0.648800 | 0.646300 | 0.02707000 | 0.09995000 | NM_016815       | upstream   | 334402 | Hs.59138  | GYPC     |
| rs993735   | 2  | 83617367  | 0.4803 | 97.89% | 0.401600 | 0.649900 | 0.02708000 | 0.03852000 | ENST00000362425 | upstream   | 121003 | ---       | ---      |
| rs1500150  | 5  | 85120228  | 0.2749 | 95.09% | 0.760800 | 0.722300 | 0.02709000 | 0.16040000 | ENST00000333189 | downstream | 238704 | ---       | ---      |
| rs10503152 | 8  | 795383    | 0.0363 | 91.93% | 1.000000 | 1.000000 | 0.02711000 | 0.06544000 | NM_207332       | upstream   | 124157 | Hs.655310 | ERICH1   |
| rs1840574  | 11 | 106419826 | 0.1925 | 92.98% | 0.427400 | 0.413900 | 0.02711000 | 0.00303700 | NM_000855       | upstream   | 25445  | Hs.654555 | GUCY1A2  |
| rs10495174 | 1  | 219889526 | 0.3584 | 97.89% | 0.297700 | 0.494600 | 0.02712000 | 0.11120000 | NM_144729       | downstream | 51863  | Hs.497822 | DUSP10   |
| rs10516930 | 4  | 94776709  | 0.3157 | 96.14% | 0.162800 | 0.577300 | 0.02712000 | 0.00617500 | NM_001510       | intron     | 0      | Hs.480281 | GRID2    |
| rs6846560  | 4  | 131850456 | 0.4489 | 92.63% | 0.804500 | 1.000000 | 0.02713000 | 0.03932000 | ENST00000363026 | upstream   | 203076 | ---       | ---      |
| rs10502020 | 11 | 103220691 | 0.4132 | 92.98% | 0.057020 | 0.195300 | 0.02715000 | 0.00619900 | NM_033135       | downstream | 62440  | Hs.352298 | PDGFD    |
| rs10508992 | 10 | 54669439  | 0.3464 | 93.68% | 0.590500 | 1.000000 | 0.02719000 | 0.07383000 | ENST00000387222 | upstream   | 218515 | ---       | ---      |
| rs1519918  | 2  | 34631981  | 0.0870 | 96.84% | 1.000000 | 1.000000 | 0.02720000 | 0.06102000 | ENST00000322472 | upstream   | 825635 | ---       | ---      |
| rs1899728  | 15 | 50933835  | 0.1326 | 97.89% | 0.293400 | 0.152500 | 0.02720000 | 0.02848000 | NM_004498       | upstream   | 64334  | Hs.658573 | ONECUT1  |
| rs3745091  | 18 | 5945083   | 0.1082 | 94.04% | 0.527500 | 1.000000 | 0.02720000 | 0.04252000 | ENST00000317931 | 3UTR       | 0      | ---       | ---      |
| rs10509947 | 10 | 113462163 | 0.1654 | 94.39% | 0.505500 | 1.000000 | 0.02721000 | 0.01885000 | NM_020918       | downstream | 437451 | Hs.42586  | GPAM     |
| rs10511296 | 3  | 112680250 | 0.1344 | 97.89% | 0.303100 | 0.165200 | 0.02722000 | 0.01167000 | NM_005816       | upstream   | 63296  | Hs.142023 | CD96     |
| rs2830244  | 21 | 26769135  | 0.1344 | 97.89% | 0.438900 | 0.576700 | 0.02722000 | 0.01171000 | NM_052954       | intron     | 0      | Hs.37445  | CYYR1    |
| rs9294266  | 6  | 83666784  | 0.2100 | 94.39% | 0.461500 | 0.301800 | 0.02724000 | 0.00531300 | NM_198920       | intron     | 0      | Hs.148609 | UBE2CBP  |
| rs1011170  | 6  | 91386931  | 0.3339 | 95.09% | 0.891300 | 0.858400 | 0.02725000 | 0.13150000 | NM_145333       | upstream   | 33303  | Hs.644143 | MAP3K7   |
| rs2142333  | 8  | 116728632 | 0.4867 | 92.28% | 0.711300 | 1.000000 | 0.02725000 | 0.16390000 | NM_014112       | intron     | 0      | Hs.657018 | TRPS1    |
| rs7946495  | 11 | 7286469   | 0.2302 | 97.54% | 0.615800 | 0.814300 | 0.02725000 | 0.06561000 | NM_175733       | intron     | 0      | Hs.177193 | SYT9     |
| rs2291959  | 16 | 68431493  | 0.2626 | 97.54% | 0.357200 | 0.857100 | 0.02726000 | 0.10680000 | NM_199423       | intron     | 0      | Hs.408458 | WWP2     |
| rs10484888 | 6  | 10945240  | 0.1070 | 95.09% | 0.099430 | 1.000000 | 0.02729000 | 0.02752000 | NM_005906       | intron     | 0      | Hs.446125 | MAK      |
| rs7849676  | 9  | 8015789   | 0.3046 | 91.58% | 0.883700 | 0.865600 | 0.02729000 | 0.04879000 | NM_033428       | upstream   | 225722 | Hs.7517   | C9orf123 |
| rs10508670 | 10 | 24499009  | 0.2454 | 95.09% | 0.622200 | 0.851600 | 0.02731000 | 0.05960000 | ENST00000376462 | intron     | 0      | ---       | ---      |
| rs10513441 | 3  | 154522958 | 0.4624 | 97.89% | 0.719500 | 0.288600 | 0.02731000 | 0.10900000 | ENST00000383956 | upstream   | 122462 | ---       | ---      |
| rs33423    | 5  | 71916292  | 0.2454 | 95.09% | 0.411400 | 0.349500 | 0.02731000 | 0.00745300 | NM_152625       | upstream   | 77290  | Hs.370303 | ZNF366   |
| rs4109855  | 2  | 34807591  | 0.3022 | 97.54% | 1.000000 | 0.704100 | 0.02731000 | 0.02745000 | ENST00000384525 | upstream   | 742584 | ---       | ---      |
| rs42775    | 5  | 71916270  | 0.2454 | 95.09% | 0.411400 | 0.349500 | 0.02731000 | 0.00703600 | NM_152625       | upstream   | 77268  | Hs.370303 | ZNF366   |
| rs3852286  | 7  | 140319903 | 0.2014 | 97.54% | 0.851700 | 0.398500 | 0.02732000 | 0.05617000 | NM_053035       | downstream | 32533  | Hs.416207 | MRPS33   |
| rs957634   | 1  | 29171596  | 0.0632 | 97.19% | 1.000000 | 0.297100 | 0.02732000 | 0.01730000 | NM_004437       | intron     | 0      | Hs.175437 | EPB41    |
| rs10518118 | 4  | 74970842  | 0.3199 | 95.44% | 0.577200 | 0.359000 | 0.02733000 | 0.05241000 | NM_001511       | downstream | 2593   | Hs.789    | CXCL1    |
| rs10491019 | 10 | 110097967 | 0.4096 | 95.09% | 0.707100 | 0.763100 | 0.02735000 | 0.17110000 | ENST00000388288 | downstream | 592854 | ---       | ---      |
| rs6842938  | 4  | 96111151  | 0.0646 | 95.09% | 1.000000 | 1.000000 | 0.02735000 | 0.01198000 | NM_001203       | intron     | 0      | Hs.661426 | BMPRI1B  |
| rs242326   | 21 | 27749561  | 0.1147 | 97.89% | 0.146500 | 0.206300 | 0.02736000 | 0.00887700 | ENST00000382877 | upstream   | 103780 | ---       | ---      |



|            |    |           |        |        |          |          |            |            |                 |            |        |           |         |
|------------|----|-----------|--------|--------|----------|----------|------------|------------|-----------------|------------|--------|-----------|---------|
| rs10518978 | 15 | 56543465  | 0.1852 | 94.74% | 0.543500 | 0.652600 | 0.02737000 | 0.02517000 | NM_000236       | intron     | 0      | Hs.654472 | LIPC    |
| rs721114   | 7  | 51781201  | 0.1852 | 94.74% | 0.067300 | 0.176900 | 0.02737000 | 0.07342000 | ENST00000388001 | downstream | 29081  | ---       | ---     |
| rs8093632  | 18 | 64297451  | 0.0221 | 95.09% | 1.000000 | 1.000000 | 0.02737000 | 0.03747000 | NM_019022       | downstream | 194456 | Hs.440534 | TXNDC10 |
| rs4747872  | 10 | 10714372  | 0.0904 | 95.09% | 0.707600 | 1.000000 | 0.02738000 | 0.01974000 | NM_001025077    | upstream   | 533084 | Hs.309288 | CUGBP2  |
| rs943855   | 9  | 89460147  | 0.4964 | 97.89% | 0.472400 | 0.072420 | 0.02738000 | 0.36700000 | NM_004938       | intron     | 0      | Hs.380277 | DAPK1   |
| rs580253   | 11 | 104405698 | 0.2472 | 94.39% | 0.623400 | 1.000000 | 0.02740000 | 0.23110000 | NM_033293       | CDS        | 0      | Hs.2490   | CASP1   |
| rs948435   | 18 | 19637770  | 0.1773 | 88.07% | 0.082460 | 0.057310 | 0.02740000 | 0.02298000 | NM_198129       | intron     | 0      | Hs.436367 | LAMA3   |
| rs2073042  | 6  | 4622959   | 0.2191 | 93.68% | 0.720000 | 0.685100 | 0.02743000 | 0.08442000 | NM_170752       | upstream   | 28433  | Hs.269092 | CDYL    |
| rs9294331  | 6  | 86019189  | 0.2444 | 94.74% | 0.743600 | 0.850000 | 0.02743000 | 0.19970000 | ENST00000385105 | upstream   | 35758  | ---       | ---     |
| rs1060373  | 10 | 62224506  | 0.1354 | 97.19% | 1.000000 | 0.234300 | 0.02747000 | 0.03247000 | NM_033379       | 3UTR       | 0      | Hs.334562 | CDC2    |
| rs10485823 | 20 | 1367846   | 0.0382 | 91.93% | 0.000163 | 0.000301 | 0.02748000 | 0.08018000 | NM_182483       | downstream | 2965   | Hs.12865  | NSFL1C  |
| rs10507778 | 13 | 69480993  | 0.0413 | 84.91% | 0.335800 | 0.393100 | 0.02749000 | 0.06229000 | NM_020866       | intron     | 0      | Hs.508201 | KLHL1   |
| rs2213951  | 14 | 30345865  | 0.2310 | 97.19% | 0.734800 | 1.000000 | 0.02749000 | 0.08583000 | NM_004086       | upstream   | 68031  | Hs.21016  | COCH    |
| rs973090   | 1  | 216228890 | 0.0823 | 55.44% | 0.000000 | 0.000000 | 0.02751000 | 0.58350000 | NM_138796       | downstream | 117229 | Hs.171130 | SPATA17 |
| rs10510492 | 3  | 19767401  | 0.2119 | 94.39% | 0.000037 | 0.000532 | 0.02752000 | 0.02040000 | NM_144715       | downstream | 128571 | Hs.670883 | EFHB    |
| rs10491440 | 5  | 58924962  | 0.1477 | 92.63% | 0.323300 | 0.299000 | 0.02754000 | 0.14350000 | ENST00000340635 | intron     | 0      | ---       | ---     |
| rs1486767  | 4  | 30325563  | 0.3272 | 86.32% | 0.310700 | 0.343100 | 0.02754000 | 0.06038000 | NM_032457       | upstream   | 6580   | Hs.570785 | PCDH7   |
| rs1416851  | 10 | 84325671  | 0.3692 | 83.16% | 0.328800 | 0.720400 | 0.02757000 | 0.01241000 | NM_001010848    | intron     | 0      | Hs.125119 | NRG3    |
| rs6687999  | 1  | 212975718 | 0.1653 | 84.91% | 0.008426 | 0.313000 | 0.02757000 | 0.04199000 | NM_016343       | downstream | 71183  | Hs.497741 | CENPF   |
| rs10515373 | 1  | 60474312  | 0.2088 | 95.79% | 1.000000 | 1.000000 | 0.02758000 | 0.09392000 | NM_152377       | upstream   | 162282 | Hs.47385  | C1orf87 |
| rs8111998  | 19 | 22533515  | 0.1196 | 96.84% | 0.247800 | 0.198700 | 0.02758000 | 0.03997000 | ENST00000384667 | downstream | 3506   | ---       | ---     |
| rs10492498 | 13 | 109648524 | 0.3180 | 95.44% | 0.001289 | 0.013970 | 0.02759000 | 0.04110000 | NM_001845       | intron     | 0      | Hs.17441  | COL4A1  |
| rs10504845 | 8  | 89414303  | 0.2022 | 97.19% | 0.851900 | 0.832700 | 0.02759000 | 0.04094000 | NM_022564       | upstream   | 5411   | Hs.546267 | MMP16   |
| rs1448907  | 2  | 138002461 | 0.1654 | 92.28% | 0.259900 | 0.211200 | 0.02760000 | 0.11620000 | ENST00000272643 | intron     | 0      | ---       | ---     |
| rs10501751 | 11 | 90475764  | 0.1078 | 94.39% | 1.000000 | 1.000000 | 0.02761000 | 0.03711000 | NM_012124       | upstream   | 879937 | Hs.22857  | CHORDC1 |
| rs173969   | 5  | 40877713  | 0.3401 | 94.39% | 0.787300 | 0.747600 | 0.02761000 | 0.00990900 | NM_032587       | intron     | 0      | Hs.200242 | CARD6   |
| rs832994   | 7  | 136489930 | 0.0370 | 94.74% | 1.000000 | 1.000000 | 0.02761000 | 0.01381000 | NM_002825       | downstream | 72707  | Hs.371249 | PTN     |
| rs2019576  | 11 | 98988128  | 0.2907 | 94.74% | 0.883200 | 0.559300 | 0.02762000 | 0.02642000 | NM_175566       | upstream   | 207345 | Hs.656783 | CNTN5   |
| rs4773773  | 13 | 93509501  | 0.3370 | 94.74% | 0.685300 | 0.749000 | 0.02762000 | 0.03963000 | NM_005708       | intron     | 0      | Hs.444329 | GPC6    |
| rs1924605  | 13 | 32253337  | 0.2727 | 96.49% | 0.048530 | 0.300800 | 0.02764000 | 0.17900000 | NM_015032       | downstream | 3180   | Hs.699308 | PDS5B   |
| rs10504868 | 8  | 89993930  | 0.2058 | 97.19% | 1.000000 | 0.836700 | 0.02765000 | 0.05412000 | NM_003821       | upstream   | 845243 | Hs.103755 | RIPK2   |
| rs1582165  | 1  | 246668012 | 0.0984 | 87.37% | 0.070790 | 0.704700 | 0.02766000 | 0.10780000 | NM_001004136    | upstream   | 14710  | Hs.554482 | OR2T2   |
| rs3996993  | 6  | 52833480  | 0.3669 | 97.54% | 0.796400 | 0.877000 | 0.02766000 | 0.02313000 | NM_153699       | upstream   | 14628  | Hs.553652 | GSTA5   |
| rs10486120 | 7  | 11293764  | 0.0143 | 97.89% | 1.000000 | 1.000000 | 0.02770000 | 0.02071000 | NM_014660       | downstream | 117997 | Hs.655688 | PHF14   |
| rs7172518  | 15 | 44973231  | 0.3967 | 95.09% | 0.203800 | 0.444700 | 0.02772000 | 0.03305000 | ENST00000388020 | upstream   | 173230 | ---       | ---     |
| rs10514397 | 16 | 74602921  | 0.4875 | 97.89% | 0.401700 | 1.000000 | 0.02773000 | 0.04987000 | ENST00000362429 | upstream   | 150365 | ---       | ---     |
| rs1512801  | 8  | 5703362   | 0.0222 | 94.74% | 1.000000 | 1.000000 | 0.02773000 | 0.04039000 | ENST00000363751 | downstream | 52484  | ---       | ---     |
| rs2961857  | 5  | 165880413 | 0.2172 | 93.68% | 0.470700 | 1.000000 | 0.02773000 | 0.01842000 | ENST00000320147 | downstream | 138226 | ---       | ---     |
| rs7326191  | 13 | 48737980  | 0.2878 | 95.09% | 0.882400 | 0.845600 | 0.02773000 | 0.07998000 | NM_030911       | intron     | 0      | Hs.388220 | CDADC1  |
| rs871976   | 16 | 74603719  | 0.4875 | 97.89% | 0.401700 | 1.000000 | 0.02773000 | 0.04987000 | ENST00000362429 | upstream   | 151163 | ---       | ---     |
| rs4935636  | 10 | 57502313  | 0.4248 | 93.33% | 0.258500 | 0.220200 | 0.02774000 | 0.08724000 | NM_001005414    | downstream | 284892 | ---       | ZWINT   |
| rs1106684  | 7  | 131104205 | 0.0709 | 89.12% | 0.000496 | 0.350300 | 0.02775000 | 0.06356000 | ENST00000305171 | upstream   | 14885  | ---       | ---     |
| rs1151380  | 13 | 100553186 | 0.1800 | 96.49% | 1.000000 | 0.564000 | 0.02775000 | 0.03001000 | NM_052867       | intron     | 0      | Hs.525146 | NALCN   |
| rs1918462  | 3  | 22132614  | 0.2677 | 89.12% | 1.000000 | 0.514000 | 0.02775000 | 0.02073000 | NM_024697       | upstream   | 364794 | Hs.21026  | ZNF385D |
| rs1607429  | 2  | 57476744  | 0.1139 | 90.88% | 0.031630 | 0.141800 | 0.02777000 | 0.00708600 | NM_006296       | upstream   | 650480 | Hs.631890 | VRK2    |
| rs335200   | 5  | 122538028 | 0.0369 | 95.09% | 0.304900 | 1.000000 | 0.02778000 | 0.10610000 | ENST00000261364 | intron     | 0      | ---       | ---     |
| rs3765023  | 2  | 163336511 | 0.2624 | 92.28% | 0.205700 | 0.144200 | 0.02779000 | 0.19340000 | NM_173162       | intron     | 0      | Hs.657413 | KCNH7   |
| rs554473   | 6  | 25164660  | 0.0145 | 96.84% | 1.000000 | 1.000000 | 0.02780000 | 0.02542000 | ENST00000377993 | downstream | 24614  | ---       | ---     |
| rs10488337 | 7  | 131128084 | 0.0764 | 96.49% | 0.662300 | 0.661400 | 0.02781000 | 0.10240000 | ENST00000305171 | upstream   | 38764  | ---       | ---     |
| rs1147963  | 10 | 44292854  | 0.2932 | 93.33% | 0.038220 | 0.428000 | 0.02782000 | 0.06853000 | NM_001033886    | upstream   | 92306  | Hs.522891 | CXCL12  |
| rs2512186  | 11 | 123634557 | 0.4302 | 92.98% | 0.380100 | 0.542700 | 0.02783000 | 0.04253000 | NM_001005198    | intron     | 0      | Hs.626840 | OR8G5   |
| rs7791639  | 7  | 21766724  | 0.0947 | 92.63% | 0.018260 | 0.055330 | 0.02783000 | 0.02407000 | NM_003777       | intron     | 0      | Hs.655326 | DNAH11  |
| rs314014   | 5  | 3116045   | 0.2158 | 84.56% | 0.001842 | 0.175200 | 0.02784000 | 0.06365000 | NM_178569       | downstream | 307534 | Hs.668017 | C5orf38 |
| rs7981822  | 13 | 30586396  | 0.2373 | 89.47% | 0.603300 | 0.237900 | 0.02785000 | 0.06300000 | NM_006644       | downstream | 22369  | Hs.36927  | HSPH1   |

|            |    |           |        |        |          |          |            |            |                 |            |        |           |          |
|------------|----|-----------|--------|--------|----------|----------|------------|------------|-----------------|------------|--------|-----------|----------|
| rs10258427 | 7  | 135839268 | 0.2292 | 88.77% | 0.480200 | 0.540600 | 0.02787000 | 0.05089000 | NM_001006629    | upstream   | 364688 | Hs.535891 | CHRM2    |
| rs542892   | 11 | 84468686  | 0.3483 | 93.68% | 0.686200 | 0.602300 | 0.02787000 | 0.13410000 | ENST00000376104 | intron     | 0      | ---       | ---      |
| rs2725225  | 4  | 89171100  | 0.4792 | 92.63% | 0.391100 | 0.223200 | 0.02792000 | 0.08522000 | NM_000297       | intron     | 0      | Hs.181272 | PKD2     |
| rs10492403 | 13 | 32641090  | 0.0689 | 89.12% | 0.021450 | 0.045770 | 0.02793000 | 0.03041000 | NM_178008       | intron     | 0      | ---       | STARD13  |
| rs1327307  | 13 | 26600230  | 0.1444 | 94.74% | 0.806500 | 1.000000 | 0.02797000 | 0.00623600 | NM_182488       | intron     | 0      | Hs.42400  | USP12    |
| rs10499008 | 6  | 97445369  | 0.2585 | 92.98% | 0.198400 | 0.195800 | 0.02799000 | 0.09508000 | NM_014165       | 3UTR       | 0      | Hs.591333 | C6orf66  |
| rs10514861 | 5  | 58833672  | 0.1241 | 94.74% | 0.268600 | 0.544000 | 0.02799000 | 0.05858000 | ENST00000340635 | intron     | 0      | ---       | ---      |
| rs4770548  | 13 | 23487379  | 0.0165 | 84.91% | 0.057070 | 1.000000 | 0.02799000 | 0.16580000 | NM_153023       | upstream   | 145508 | Hs.657121 | SPATA13  |
| rs722575   | 5  | 41033992  | 0.3082 | 97.89% | 0.327300 | 1.000000 | 0.02801000 | 0.10910000 | NM_173489       | CDS        | 0      | Hs.97714  | FLJ40243 |
| rs1371231  | 4  | 178378630 | 0.3687 | 97.54% | 0.197300 | 0.215200 | 0.02804000 | 0.08159000 | NM_018248       | upstream   | 89392  | Hs.405467 | NEIL3    |
| rs10496717 | 2  | 134548190 | 0.0426 | 82.46% | 0.055760 | 1.000000 | 0.02805000 | 0.03048000 | ENST00000385574 | upstream   | 157047 | ---       | ---      |
| rs9284859  | 3  | 26883268  | 0.1896 | 94.39% | 1.000000 | 0.782800 | 0.02805000 | 0.18150000 | NM_052953       | downstream | 156002 | Hs.517868 | LRRC3B   |
| rs10521313 | 16 | 53078197  | 0.3759 | 97.54% | 0.898300 | 0.759500 | 0.02808000 | 0.01059000 | NM_024336       | upstream   | 200318 | Hs.499205 | IRX3     |
| rs442873   | 15 | 32431935  | 0.1124 | 90.53% | 0.219300 | 1.000000 | 0.02808000 | 0.00690900 | NM_175741       | intron     | 0      | Hs.525769 | C15orf55 |
| rs7686717  | 4  | 179246639 | 0.1472 | 92.98% | 0.136500 | 0.474500 | 0.02811000 | 0.35050000 | ENST00000362450 | downstream | 28217  | ---       | ---      |
| rs266170   | 2  | 107413976 | 0.2338 | 97.54% | 0.614800 | 0.647000 | 0.02812000 | 0.16800000 | NM_032528       | upstream   | 544934 | Hs.98265  | ST6GAL2  |
| rs10497341 | 2  | 169036241 | 0.1264 | 94.39% | 0.780400 | 0.770200 | 0.02813000 | 0.05035000 | NM_203463       | intron     | 0      | Hs.506829 | LASS6    |
| rs9323037  | 14 | 40501442  | 0.4811 | 92.63% | 0.326800 | 0.539400 | 0.02813000 | 0.01259000 | NM_152447       | upstream   | 645081 | Hs.136893 | LRFN5    |
| rs540128   | 18 | 58695331  | 0.4733 | 91.93% | 0.456900 | 0.442700 | 0.02814000 | 0.07117000 | NM_194449       | intron     | 0      | Hs.465337 | PHLPP    |
| rs536412   | 11 | 74393553  | 0.2462 | 92.63% | 0.047600 | 0.018760 | 0.02816000 | 0.00438100 | NM_006656       | intron     | 0      | Hs.191074 | NEU3     |
| rs7156012  | 14 | 82440783  | 0.4073 | 81.40% | 0.586500 | 0.329400 | 0.02816000 | 0.02608000 | ENST00000362427 | upstream   | 143892 | ---       | ---      |
| rs10494639 | 1  | 188954081 | 0.4547 | 92.98% | 0.025560 | 0.041000 | 0.02817000 | 0.06117000 | NM_199051       | upstream   | 240699 | Hs.65765  | FAM5C    |
| rs2425094  | 20 | 33770388  | 0.1372 | 97.19% | 0.616100 | 0.243600 | 0.02817000 | 0.01408000 | NM_184241       | intron     | 0      | ---       | RBM39    |
| rs6124036  | 20 | 58950874  | 0.2932 | 93.33% | 0.183300 | 0.169100 | 0.02817000 | 0.00594700 | NM_001794       | upstream   | 310080 | Hs.473231 | CDH4     |
| rs1409809  | 1  | 182456492 | 0.3182 | 96.49% | 0.012220 | 0.197300 | 0.02819000 | 0.06701000 | ENST00000362970 | upstream   | 48912  | ---       | ---      |
| rs714028   | 22 | 44303830  | 0.0977 | 89.82% | 0.717600 | 1.000000 | 0.02819000 | 0.03522000 | NM_006486       | intron     | 0      | Hs.24601  | FBLN1    |
| rs2328412  | 20 | 19495270  | 0.3782 | 96.49% | 0.898000 | 0.738200 | 0.02821000 | 0.06494000 | NM_020689       | intron     | 0      | Hs.654790 | SLC24A3  |
| rs7675107  | 4  | 77256806  | 0.1812 | 96.84% | 0.418600 | 0.648000 | 0.02821000 | 0.01351000 | NM_017426       | intron     | 0      | Hs.430435 | NUP54    |
| rs876050   | 7  | 30085935  | 0.2185 | 94.74% | 0.212200 | 0.046640 | 0.02822000 | 0.03529000 | NM_015899       | intron     | 0      | Hs.558495 | PLEKHA9  |
| rs9320379  | 6  | 112291314 | 0.2185 | 94.74% | 1.000000 | 1.000000 | 0.02822000 | 0.03759000 | NM_153048       | intron     | 0      | Hs.390567 | FPN      |
| rs459530   | 5  | 122524475 | 0.1028 | 87.02% | 0.153600 | 0.262600 | 0.02825000 | 0.11690000 | ENST00000261364 | intron     | 0      | ---       | ---      |
| rs10518722 | 15 | 51573373  | 0.2058 | 97.19% | 0.267800 | 0.797900 | 0.02829000 | 0.05864000 | NM_182758       | downstream | 21300  | Hs.122125 | WDR72    |
| rs2167390  | 2  | 79455249  | 0.1421 | 95.09% | 0.452600 | 0.714900 | 0.02829000 | 0.18010000 | NM_138937       | upstream   | 214862 | Hs.567312 | REG3A    |
| rs10510760 | 3  | 52625388  | 0.4403 | 94.04% | 0.385700 | 0.225800 | 0.02833000 | 0.10540000 | NM_181042       | intron     | 0      | Hs.189920 | PBRM1    |
| rs10513239 | 3  | 145210016 | 0.1559 | 97.89% | 0.359100 | 1.000000 | 0.02833000 | 0.03783000 | NM_173552       | downstream | 16123  | Hs.288954 | C3orf58  |
| rs4842779  | 12 | 90484944  | 0.3340 | 94.04% | 0.783800 | 0.869400 | 0.02833000 | 0.04539000 | NM_133507       | upstream   | 384007 | Hs.156316 | DCN      |
| rs410629   | 19 | 52162702  | 0.4608 | 94.04% | 1.000000 | 0.644600 | 0.02834000 | 0.02310000 | NM_004491       | intron     | 0      | Hs.509447 | GRLF1    |
| rs4132192  | 18 | 30000140  | 0.3869 | 96.14% | 0.127600 | 0.250400 | 0.02834000 | 0.24680000 | NM_003787       | intron     | 0      | Hs.514795 | NOL4     |
| rs233723   | 12 | 111515824 | 0.2717 | 96.84% | 0.094160 | 0.300800 | 0.02835000 | 0.04894000 | NM_002834       | downstream | 83725  | Hs.506852 | PTPN11   |
| rs10504391 | 8  | 66795663  | 0.0433 | 97.19% | 0.082870 | 1.000000 | 0.02837000 | 0.01418000 | NM_002603       | intron     | 0      | Hs.584788 | PDE7A    |
| rs2417968  | 12 | 21263396  | 0.4678 | 92.63% | 1.000000 | 0.760300 | 0.02838000 | 0.06269000 | NM_006446       | intron     | 0      | Hs.449738 | SLCO1B1  |
| rs1018617  | 13 | 104839981 | 0.2981 | 92.98% | 1.000000 | 0.863800 | 0.02840000 | 0.00954400 | NM_172370       | upstream   | 76612  | Hs.381382 | DAOA     |
| rs10488598 | 7  | 136238383 | 0.2745 | 82.46% | 0.072440 | 0.038560 | 0.02840000 | 0.01310000 | NM_001006629    | intron     | 0      | Hs.535891 | CHRM2    |
| rs1222512  | 12 | 89297974  | 0.4244 | 95.09% | 0.901300 | 0.430400 | 0.02842000 | 0.03146000 | ENST00000359455 | upstream   | 558590 | ---       | ---      |
| rs2961223  | 3  | 105757056 | 0.1698 | 91.93% | 1.000000 | 1.000000 | 0.02843000 | 0.11680000 | ENST00000388649 | downstream | 255396 | ---       | ---      |
| rs1998276  | 11 | 34266095  | 0.3199 | 91.58% | 0.086990 | 0.095380 | 0.02847000 | 0.01834000 | NM_145804       | intron     | 0      | Hs.23361  | ABTB2    |
| rs360376   | 2  | 126836257 | 0.0808 | 93.33% | 0.682100 | 0.682700 | 0.02850000 | 0.11390000 | NM_016815       | upstream   | 328287 | Hs.59138  | GYPC     |
| rs483330   | 1  | 49364564  | 0.3494 | 94.39% | 0.893600 | 0.606000 | 0.02850000 | 0.10030000 | ENST00000334103 | intron     | 0      | ---       | ---      |
| rs2038621  | 9  | 100689774 | 0.1468 | 94.39% | 0.473400 | 1.000000 | 0.02851000 | 0.00849800 | NM_024642       | downstream | 37590  | Hs.47099  | GALNT12  |
| rs4146372  | 12 | 70417887  | 0.3000 | 92.98% | 0.884100 | 1.000000 | 0.02851000 | 0.04881000 | NM_014999       | upstream   | 17038  | Hs.524590 | RAB21    |
| rs1003069  | 9  | 16630702  | 0.3687 | 90.88% | 0.595600 | 0.337300 | 0.02853000 | 0.15590000 | NM_017637       | intron     | 0      | Hs.656581 | BNC2     |
| rs721358   | 2  | 224075200 | 0.2688 | 97.89% | 0.878800 | 1.000000 | 0.02855000 | 0.05233000 | NM_003469       | downstream | 94706  | Hs.516726 | SCG2     |
| rs1892482  | 1  | 240840701 | 0.0556 | 94.74% | 0.573700 | 1.000000 | 0.02856000 | 0.15520000 | NM_152666       | upstream   | 86080  | Hs.672452 | PLD5     |
| rs963850   | 2  | 115859998 | 0.2897 | 95.09% | 0.767600 | 0.434000 | 0.02856000 | 0.20440000 | NM_001004360    | intron     | 0      | Hs.591555 | DPP10    |

|            |    |           |        |        |          |          |            |            |                 |            |         |           |          |
|------------|----|-----------|--------|--------|----------|----------|------------|------------|-----------------|------------|---------|-----------|----------|
| rs10514613 | 16 | 84688032  | 0.2823 | 95.09% | 0.456300 | 1.000000 | 0.02861000 | 0.14640000 | ENST00000326395 | downstream | 60506   | ---       | ---      |
| rs1293288  | 8  | 11755937  | 0.4943 | 92.28% | 0.387800 | 0.066080 | 0.02861000 | 0.01246000 | NM_147783       | intron     | 0       | Hs.520898 | CTSB     |
| rs828722   | 5  | 162240294 | 0.1711 | 93.33% | 0.029460 | 0.060480 | 0.02861000 | 0.00957000 | NM_199246       | upstream   | 556861  | Hs.79101  | CCNG1    |
| rs10510620 | 3  | 29305290  | 0.1692 | 93.33% | 0.828200 | 0.475200 | 0.02862000 | 0.13040000 | NM_001003792    | intron     | 0       | Hs.696468 | RBMS3    |
| rs2314739  | 3  | 1573861   | 0.2547 | 92.98% | 0.626800 | 0.828100 | 0.02862000 | 0.03661000 | NM_014461       | downstream | 153583  | Hs.387300 | CNTN6    |
| rs3769194  | 2  | 173691231 | 0.1774 | 97.89% | 0.215400 | 0.489500 | 0.02862000 | 0.16570000 | NM_133646       | intron     | 0       | Hs.444451 | ZAK      |
| rs4789523  | 17 | 73524449  | 0.3873 | 96.49% | 1.000000 | 1.000000 | 0.02862000 | 0.03237000 | NM_018996       | upstream   | 32140   | Hs.584945 | TNRC6C   |
| rs8005131  | 14 | 32660856  | 0.4981 | 93.33% | 0.463400 | 0.169400 | 0.02863000 | 0.18230000 | NM_022123       | intron     | 0       | Hs.659456 | NPAS3    |
| rs9283795  | 5  | 79118103  | 0.1417 | 84.21% | 0.434300 | 0.252200 | 0.02864000 | 0.00209000 | NM_153610       | intron     | 0       | Hs.482625 | CMYA5    |
| rs9316173  | 13 | 45365265  | 0.1096 | 91.23% | 0.332600 | 0.614100 | 0.02864000 | 0.29870000 | NM_015070       | downstream | 69050   | Hs.136102 | ZC3H13   |
| rs10496879 | 2  | 141835904 | 0.0299 | 94.04% | 1.000000 | 1.000000 | 0.02865000 | 0.04583000 | NM_018557       | intron     | 0       | Hs.656461 | LRP1B    |
| rs1370361  | 2  | 55416524  | 0.2417 | 95.09% | 0.621200 | 0.822400 | 0.02865000 | 0.03637000 | NM_018084       | intron     | 0       | Hs.292925 | CCDC88A  |
| rs1192372  | 2  | 84865057  | 0.2463 | 94.74% | 0.013950 | 0.013340 | 0.02866000 | 0.14500000 | ENST00000389394 | intron     | 0       | ---       | ---      |
| rs10261822 | 7  | 50282713  | 0.2099 | 96.14% | 0.016570 | 0.099250 | 0.02867000 | 0.12480000 | NM_006060       | upstream   | 32211   | Hs.488251 | IKZF1    |
| rs26521    | 5  | 102510633 | 0.2862 | 94.39% | 0.552300 | 0.108300 | 0.02868000 | 0.08498000 | NM_015216       | intron     | 0       | Hs.212046 | HISPPD1  |
| rs737982   | 7  | 156099985 | 0.1817 | 97.54% | 0.543500 | 0.772100 | 0.02868000 | 0.01193000 | NM_032625       | downstream | 24981   | ---       | C7orf13  |
| rs921145   | 8  | 84487829  | 0.1187 | 97.54% | 0.562000 | 1.000000 | 0.02868000 | 0.02696000 | NM_173848       | upstream   | 1116283 | Hs.121663 | RALYL    |
| rs9322965  | 14 | 20862651  | 0.1187 | 97.54% | 0.562000 | 0.661400 | 0.02868000 | 0.03927000 | NM_020366       | CDS        | 0       | Hs.126035 | RPGRIPI  |
| rs1539530  | 1  | 48747520  | 0.3242 | 95.79% | 0.130500 | 1.000000 | 0.02869000 | 0.04769000 | NM_019073       | upstream   | 37088   | Hs.538103 | SPATA6   |
| rs2048873  | 2  | 113139305 | 0.2663 | 91.58% | 1.000000 | 0.833200 | 0.02869000 | 0.03062000 | NM_005415       | downstream | 1438    | Hs.187946 | SLC20A1  |
| rs1391130  | 12 | 58270954  | 0.1954 | 91.58% | 0.693800 | 0.824100 | 0.02872000 | 0.01262000 | NM_004731       | upstream   | 5161    | Hs.439643 | SLC16A7  |
| rs961313   | 2  | 170641763 | 0.3984 | 89.82% | 0.433600 | 0.741800 | 0.02874000 | 0.08603000 | NM_172070       | intron     | 0       | ---       | UBR3     |
| rs891848   | 15 | 64485226  | 0.2151 | 95.44% | 0.591900 | 0.683400 | 0.02875000 | 0.05765000 | NM_002755       | intron     | 0       | Hs.145442 | MAP2K1   |
| rs1869273  | 6  | 141565264 | 0.0465 | 94.39% | 0.442600 | 1.000000 | 0.02877000 | 0.00400800 | NM_006079       | upstream   | 1827786 | Hs.82071  | CITED2   |
| rs1608488  | 7  | 16936616  | 0.3269 | 82.11% | 0.236500 | 0.222200 | 0.02878000 | 0.04024000 | NM_176813       | upstream   | 48478   | Hs.100686 | AGR3     |
| rs7938204  | 11 | 78059326  | 0.4442 | 88.07% | 0.015430 | 0.019810 | 0.02881000 | 0.01022000 | ENST00000278550 | intron     | 0       | ---       | ---      |
| rs10521090 | 9  | 110659840 | 0.2548 | 92.28% | 1.000000 | 0.574200 | 0.02882000 | 0.02139000 | NM_006686       | upstream   | 772     | Hs.534390 | ACTL7B   |
| rs728472   | 14 | 79548254  | 0.1823 | 97.19% | 0.108100 | 0.260600 | 0.02884000 | 0.02463000 | NM_138970       | downstream | 147743  | Hs.368307 | NRXN3    |
| rs2395182  | 6  | 32521295  | 0.2043 | 97.89% | 0.361400 | 0.441000 | 0.02885000 | 0.04314000 | NM_019111       | downstream | 352     | Hs.520048 | HLA-DRA  |
| rs7701735  | 5  | 85719306  | 0.2076 | 97.19% | 0.855700 | 0.798800 | 0.02885000 | 0.00756800 | NM_001867       | upstream   | 230171  | Hs.430075 | COX7C    |
| rs10507414 | 13 | 33195843  | 0.0303 | 92.63% | 1.000000 | 1.000000 | 0.02889000 | 0.01221000 | NM_181558       | upstream   | 94391   | Hs.115474 | RFC3     |
| rs9300654  | 13 | 100624895 | 0.2623 | 92.98% | 1.000000 | 0.360600 | 0.02889000 | 0.11170000 | NM_052867       | intron     | 0       | Hs.525146 | NALCN    |
| rs1909192  | 1  | 220813609 | 0.1120 | 90.88% | 0.026210 | 0.085210 | 0.02890000 | 0.47890000 | NM_139352       | intron     | 0       | Hs.153088 | TAF1A    |
| rs541164   | 18 | 10031354  | 0.4739 | 94.04% | 0.713100 | 0.293700 | 0.02890000 | 0.04762000 | NM_194434       | downstream | 81783   | Hs.699980 | VAPA     |
| rs1368798  | 15 | 37015026  | 0.2762 | 97.19% | 0.880400 | 1.000000 | 0.02892000 | 0.06408000 | NM_207444       | downstream | 235495  | Hs.448785 | C15orf53 |
| rs2877551  | 4  | 71298176  | 0.4920 | 87.37% | 0.526100 | 0.758100 | 0.02894000 | 0.07098000 | NM_021225       | upstream   | 70      | Hs.661425 | PROL1    |
| rs874205   | 8  | 124899398 | 0.0973 | 90.18% | 0.073630 | 1.000000 | 0.02894000 | 0.05058000 | NM_144963       | downstream | 5138    | Hs.459174 | FAM91A1  |
| rs1477901  | 4  | 18182414  | 0.3195 | 97.19% | 0.582300 | 1.000000 | 0.02896000 | 0.02033000 | NM_153686       | upstream   | 549817  | Hs.446201 | LCORL    |
| rs1486466  | 8  | 91955434  | 0.4684 | 94.39% | 0.222500 | 0.228700 | 0.02896000 | 0.09470000 | NM_022351       | intron     | 0       | Hs.560892 | NECAB1   |
| rs1588076  | 12 | 62209455  | 0.2402 | 80.35% | 0.203000 | 0.147400 | 0.02896000 | 0.02497000 | NM_173812       | downstream | 29505   | Hs.533644 | DPY19L2  |
| rs2295884  | 6  | 39976014  | 0.0500 | 73.68% | 0.409000 | 0.123400 | 0.02896000 | 0.19920000 | NM_015345       | intron     | 0       | Hs.652207 | DAAM2    |
| rs10499722 | 7  | 53896575  | 0.1959 | 94.04% | 0.845800 | 1.000000 | 0.02897000 | 0.00761000 | NM_001001707    | upstream   | 49465   | ---       | FLJ45974 |
| rs718262   | 8  | 103045180 | 0.3574 | 92.28% | 0.893900 | 0.600600 | 0.02899000 | 0.07376000 | NM_032041       | intron     | 0       | Hs.492427 | NCALD    |
| rs2191508  | 2  | 195375221 | 0.1029 | 97.19% | 1.000000 | 0.735200 | 0.02900000 | 0.04873000 | ENST00000364989 | upstream   | 138078  | ---       | ---      |
| rs1378753  | 2  | 138268400 | 0.2418 | 95.79% | 0.048070 | 0.171300 | 0.02903000 | 0.01467000 | NM_001024075    | upstream   | 169878  | Hs.42151  | HNMT     |
| rs10487523 | 7  | 144482284 | 0.2091 | 96.49% | 0.361200 | 0.298700 | 0.02906000 | 0.01174000 | ENST00000363803 | upstream   | 304174  | ---       | ---      |
| rs10488917 | 4  | 112142061 | 0.0461 | 95.09% | 0.440100 | 1.000000 | 0.02907000 | 0.03169000 | NM_000325       | upstream   | 378358  | Hs.643588 | PITX2    |
| rs10506556 | 12 | 66195833  | 0.0846 | 91.23% | 0.701500 | 1.000000 | 0.02907000 | 0.05608000 | NM_006482       | upstream   | 133188  | Hs.173135 | DYRK2    |
| rs10516257 | 4  | 12253560  | 0.4035 | 90.88% | 0.072100 | 0.145400 | 0.02908000 | 0.03447000 | ENST00000387175 | downstream | 330148  | ---       | ---      |
| rs6821318  | 4  | 20804115  | 0.4407 | 94.74% | 1.000000 | 1.000000 | 0.02910000 | 0.11210000 | NM_001035004    | intron     | 0       | Hs.655705 | KCNIP4   |
| rs7728402  | 5  | 174361854 | 0.4524 | 81.05% | 0.000000 | 0.000000 | 0.02910000 | 0.16120000 | NM_001004348    | upstream   | 6531    | ---       | FLJ16171 |
| rs2377426  | 9  | 77736209  | 0.2712 | 91.23% | 1.000000 | 0.835600 | 0.02911000 | 0.04060000 | NM_006200       | intron     | 0       | Hs.368542 | PCSK5    |
| rs6969997  | 7  | 31278995  | 0.1661 | 95.09% | 0.509800 | 1.000000 | 0.02911000 | 0.12240000 | NM_022728       | downstream | 64612   | Hs.45152  | NEUROD6  |
| rs10490814 | 3  | 45192647  | 0.1191 | 97.19% | 0.000360 | 0.001747 | 0.02913000 | 0.10520000 | NM_178181       | upstream   | 29729   | Hs.476093 | CDCP1    |

|            |    |           |        |        |          |          |            |            |                 |            |         |           |           |
|------------|----|-----------|--------|--------|----------|----------|------------|------------|-----------------|------------|---------|-----------|-----------|
| rs2826129  | 21 | 20589180  | 0.4310 | 83.86% | 0.064780 | 0.122900 | 0.02914000 | 0.01941000 | ENST00000387009 | downstream | 60751   | ---       | ---       |
| rs6696791  | 1  | 225311107 | 0.1062 | 95.79% | 0.098340 | 0.169200 | 0.02914000 | 0.01050000 | NM_003607       | intron     | 0       | Hs.35433  | CDC42BPA  |
| rs237112   | 6  | 79451719  | 0.3911 | 90.18% | 0.049170 | 0.156500 | 0.02915000 | 0.03931000 | NM_001010844    | upstream   | 182189  | Hs.656212 | IRAK1BP1  |
| rs1065024  | 11 | 15945926  | 0.2247 | 93.68% | 0.380600 | 0.147400 | 0.02916000 | 0.16210000 | NM_033326       | downstream | 2445    | Hs.368226 | SOX6      |
| rs2140218  | 12 | 70906018  | 0.0297 | 94.39% | 0.017490 | 0.042370 | 0.02916000 | 0.19500000 | NM_001025457    | downstream | 27542   | ---       | LOC283392 |
| rs2340768  | 8  | 105222962 | 0.1581 | 88.77% | 0.000732 | 0.002930 | 0.02916000 | 0.10840000 | NM_014677       | intron     | 0       | Hs.655271 | RIMS2     |
| rs10496416 | 2  | 107699969 | 0.0331 | 84.91% | 0.000024 | 0.047160 | 0.02920000 | 0.05275000 | NM_032528       | upstream   | 830927  | Hs.98265  | ST6GAL2   |
| rs2145535  | 6  | 97141436  | 0.2546 | 94.39% | 0.422400 | 0.664400 | 0.02921000 | 0.00509500 | NM_020482       | intron     | 0       | Hs.632608 | FHL5      |
| rs866651   | 3  | 24237159  | 0.3201 | 97.54% | 0.492100 | 0.364300 | 0.02921000 | 0.01148000 | NM_000461       | intron     | 0       | Hs.187861 | THRB      |
| rs787116   | 10 | 29074879  | 0.1400 | 96.49% | 0.129300 | 0.173600 | 0.02922000 | 0.11980000 | NM_012342       | downstream | 63005   | Hs.533336 | BAMBI     |
| rs7243011  | 18 | 1600953   | 0.1328 | 89.82% | 1.000000 | 1.000000 | 0.02923000 | 0.01527000 | NM_022840       | downstream | 926577  | Hs.126888 | METTL4    |
| rs9314565  | 8  | 5217548   | 0.4963 | 93.68% | 0.902900 | 0.647600 | 0.02923000 | 0.15890000 | ENST00000386510 | upstream   | 229911  | ---       | ---       |
| rs2146959  | 6  | 9061356   | 0.3266 | 96.14% | 0.215800 | 0.511100 | 0.02929000 | 0.07739000 | NM_015948       | upstream   | 680641  | Hs.285847 | SLC35B3   |
| rs10509321 | 10 | 71655739  | 0.2239 | 94.04% | 0.860500 | 1.000000 | 0.02930000 | 0.10270000 | NM_021129       | intron     | 0       | Hs.437403 | PPA1      |
| rs3798244  | 6  | 116383432 | 0.3261 | 88.77% | 0.775100 | 0.312900 | 0.02930000 | 0.07607000 | NM_002031       | intron     | 0       | Hs.89426  | FRK       |
| rs10520936 | 5  | 27619491  | 0.1047 | 97.19% | 0.517400 | 0.489600 | 0.02931000 | 0.04387000 | ENST00000384531 | downstream | 471953  | ---       | ---       |
| rs1991126  | 2  | 21676503  | 0.0944 | 94.74% | 0.486100 | 0.602900 | 0.02931000 | 0.01993000 | ENST00000383859 | upstream   | 322867  | ---       | ---       |
| rs2963426  | 5  | 157914908 | 0.2963 | 94.74% | 0.558900 | 0.497200 | 0.02931000 | 0.05433000 | NM_024007       | downstream | 143789  | Hs.657753 | EBF1      |
| rs6696981  | 1  | 22575445  | 0.0944 | 94.74% | 0.071580 | 0.052350 | 0.02931000 | 0.01668000 | NM_014870       | upstream   | 75492   | Hs.418966 | ZBTB40    |
| rs3771712  | 2  | 159960814 | 0.2772 | 96.84% | 0.766100 | 0.860600 | 0.02932000 | 0.08696000 | NM_013450       | intron     | 0       | Hs.470369 | BAZ2B     |
| rs10498260 | 2  | 232764865 | 0.1489 | 91.93% | 0.048890 | 0.142300 | 0.02935000 | 0.05728000 | NM_152383       | intron     | 0       | Hs.471637 | DIS3L2    |
| rs296171   | 5  | 152584259 | 0.1227 | 95.79% | 0.394600 | 0.224600 | 0.02936000 | 0.00961200 | NM_000827       | upstream   | 266240  | Hs.519693 | GRIA1     |
| rs6784979  | 3  | 153836590 | 0.4887 | 93.33% | 0.271400 | 0.648800 | 0.02936000 | 0.03616000 | NM_207297       | downstream | 170332  | Hs.478000 | MBNL1     |
| rs10488498 | 7  | 20934866  | 0.1385 | 97.54% | 0.319400 | 0.579500 | 0.02938000 | 0.05646000 | ENST00000325612 | downstream | 101166  | ---       | ---       |
| rs2025259  | 14 | 53668865  | 0.1385 | 97.54% | 0.203600 | 0.265400 | 0.02938000 | 0.04789000 | NM_130851       | upstream   | 175503  | Hs.68879  | BMP4      |
| rs10516254 | 4  | 12243759  | 0.3609 | 93.33% | 0.790200 | 0.395100 | 0.02943000 | 0.02592000 | ENST00000387175 | downstream | 320347  | ---       | ---       |
| rs10516275 | 4  | 13831732  | 0.4833 | 94.39% | 0.142900 | 0.223600 | 0.02943000 | 0.13040000 | NM_148894       | upstream   | 593287  | Hs.444517 | FAM44A    |
| rs10485494 | 20 | 5867378   | 0.0305 | 91.93% | 0.210200 | 1.000000 | 0.02945000 | 0.06617000 | NM_015939       | intron     | 0       | Hs.128791 | TRMT6     |
| rs4673993  | 2  | 215920584 | 0.3074 | 85.61% | 0.369500 | 0.430200 | 0.02945000 | 0.02737000 | NM_004044       | intron     | 0       | Hs.90280  | ATIC      |
| rs10497036 | 2  | 149052674 | 0.0579 | 90.88% | 0.201800 | 1.000000 | 0.02947000 | 0.09138000 | NM_018328       | downstream | 65162   | Hs.458312 | MBD5      |
| rs748548   | 12 | 124387008 | 0.4204 | 94.74% | 0.133500 | 0.758800 | 0.02947000 | 0.00893800 | NM_023928       | downstream | 193194  | Hs.656073 | AACS      |
| rs10513996 | 18 | 66895350  | 0.0560 | 94.04% | 0.576600 | 0.235800 | 0.02949000 | 0.04987000 | NM_182511       | downstream | 1459545 | Hs.569851 | CBLN2     |
| rs16824479 | 2  | 184010520 | 0.0558 | 75.44% | 0.019650 | 0.157600 | 0.02949000 | 0.04412000 | NM_001008544    | downstream | 275870  | ---       | NUP35     |
| rs10505907 | 12 | 23806140  | 0.0554 | 95.09% | 1.000000 | 1.000000 | 0.02950000 | 0.08278000 | NM_178010       | intron     | 0       | Hs.657542 | SOX5      |
| rs10516210 | 4  | 10356961  | 0.0554 | 95.09% | 0.572300 | 0.233400 | 0.02950000 | 0.04487000 | NM_052964       | upstream   | 61477   | Hs.678910 | MIST      |
| rs2129260  | 8  | 91956201  | 0.4684 | 94.39% | 0.222500 | 0.176800 | 0.02950000 | 0.09916000 | NM_022351       | intron     | 0       | Hs.560892 | NECAB1    |
| rs2458437  | 12 | 69495876  | 0.1764 | 90.53% | 0.016310 | 0.011090 | 0.02951000 | 0.16440000 | NM_002849       | intron     | 0       | Hs.506076 | PTPRR     |
| rs10494649 | 1  | 189079912 | 0.4526 | 88.77% | 0.005153 | 0.013830 | 0.02952000 | 0.04268000 | NM_199051       | upstream   | 366530  | Hs.65765  | FAM5C     |
| rs2716454  | 11 | 24710115  | 0.2428 | 96.84% | 0.250400 | 0.652600 | 0.02952000 | 0.00735800 | NM_001009909    | intron     | 0       | Hs.144138 | LUZP2     |
| rs548635   | 5  | 131083445 | 0.2989 | 95.09% | 0.191100 | 0.248500 | 0.02954000 | 0.02027000 | NM_001008738    | intron     | 0       | Hs.591273 | FNIP1     |
| rs1940622  | 18 | 5945181   | 0.2565 | 95.09% | 0.110400 | 0.026540 | 0.02955000 | 0.16800000 | ENST00000317931 | 3UTR       | 0       | ---       | ---       |
| rs1411025  | 10 | 110197196 | 0.0795 | 92.63% | 0.000350 | 0.000923 | 0.02961000 | 0.03889000 | ENST00000388288 | downstream | 493625  | ---       | ---       |
| rs10495913 | 2  | 44197180  | 0.2770 | 97.54% | 0.653100 | 0.726800 | 0.02963000 | 0.21690000 | NM_133259       | upstream   | 120590  | Hs.368084 | LRPPRC    |
| rs6924188  | 6  | 155249827 | 0.4777 | 94.39% | 1.000000 | 0.759800 | 0.02963000 | 0.18550000 | NM_012454       | intron     | 0       | Hs.586279 | TIAM2     |
| rs7183692  | 15 | 59687544  | 0.1022 | 97.89% | 0.182800 | 0.317300 | 0.02963000 | 0.16850000 | NM_001018088    | downstream | 244340  | Hs.511668 | VPS13C    |
| rs2010316  | 20 | 17077082  | 0.3787 | 83.86% | 0.000000 | 0.000000 | 0.02964000 | 0.05097000 | ENST00000384329 | upstream   | 39073   | ---       | ---       |
| rs720721   | 12 | 2538005   | 0.2722 | 90.88% | 0.004452 | 0.003174 | 0.02966000 | 0.05295000 | NM_000719       | intron     | 0       | Hs.118262 | CACNA1C   |
| rs10509771 | 10 | 106145540 | 0.0520 | 97.89% | 0.535700 | 1.000000 | 0.02968000 | 0.21990000 | NM_001008723    | intron     | 0       | Hs.253576 | CCDC147   |
| rs2367478  | 3  | 194498336 | 0.1093 | 94.74% | 0.751900 | 1.000000 | 0.02968000 | 0.01942000 | NM_198505       | intron     | 0       | Hs.658032 | ATP13A5   |
| rs1997833  | 20 | 39123756  | 0.3187 | 91.93% | 0.775800 | 0.739700 | 0.02971000 | 0.00602800 | NM_003286       | intron     | 0       | Hs.592136 | TOP1      |
| rs922904   | 4  | 53575902  | 0.2457 | 82.11% | 0.294500 | 0.236200 | 0.02972000 | 0.00973100 | NM_152540       | intron     | 0       | Hs.302287 | SCFD2     |
| rs9305269  | 21 | 26274819  | 0.3022 | 94.04% | 0.562500 | 1.000000 | 0.02972000 | 0.00580500 | NM_201414       | intron     | 0       | Hs.434980 | APP       |
| rs10492371 | 12 | 27637547  | 0.0465 | 94.39% | 0.101300 | 0.148800 | 0.02974000 | 0.10360000 | NM_177444       | intron     | 0       | Hs.172445 | PPFIBP1   |
| rs1532964  | 3  | 36835547  | 0.2401 | 97.89% | 1.000000 | 0.650800 | 0.02975000 | 0.10260000 | ENST00000389421 | downstream | 11816   | ---       | ---       |

|            |    |           |        |        |          |          |            |            |                 |            |         |           |          |
|------------|----|-----------|--------|--------|----------|----------|------------|------------|-----------------|------------|---------|-----------|----------|
| rs4977880  | 9  | 23659526  | 0.2401 | 97.89% | 0.249400 | 0.502400 | 0.02975000 | 0.03042000 | NM_004432       | downstream | 22458   | Hs.166109 | ELAVL2   |
| rs10504196 | 8  | 56609912  | 0.1413 | 96.84% | 0.041990 | 0.258300 | 0.02977000 | 0.52030000 | NM_052898       | downstream | 10572   | Hs.130197 | XKR4     |
| rs1527307  | 7  | 141357368 | 0.3524 | 95.09% | 0.424000 | 0.268100 | 0.02977000 | 0.04987000 | NM_004668       | intron     | 0       | Hs.122785 | MGAM     |
| rs3744583  | 17 | 11597190  | 0.3268 | 90.18% | 0.000595 | 0.007135 | 0.02977000 | 0.03492000 | NM_001372       | intron     | 0       | Hs.567259 | DNAH9    |
| rs10500911 | 11 | 21568879  | 0.2135 | 96.14% | 0.590000 | 1.000000 | 0.02979000 | 0.03986000 | NM_006157       | downstream | 15076   | Hs.657172 | NELL1    |
| rs10520083 | 5  | 129967905 | 0.4944 | 94.74% | 0.331800 | 0.365300 | 0.02979000 | 0.05476000 | NM_005340       | downstream | 554978  | Hs.483305 | HINT1    |
| rs10435419 | 7  | 133980899 | 0.0547 | 96.14% | 0.568000 | 0.600200 | 0.02983000 | 0.07082000 | NM_199186       | upstream   | 1196    | Hs.198365 | BPGM     |
| rs10483353 | 14 | 30622371  | 0.0547 | 96.14% | 0.568000 | 0.600200 | 0.02983000 | 0.09733000 | NM_007077       | intron     | 0       | Hs.293411 | AP4S1    |
| rs6560496  | 9  | 77875690  | 0.0543 | 96.84% | 1.000000 | 1.000000 | 0.02983000 | 0.01624000 | NM_006200       | intron     | 0       | Hs.368542 | PCSK5    |
| rs9311101  | 3  | 35613665  | 0.3041 | 94.04% | 0.386100 | 0.126100 | 0.02984000 | 0.05757000 | NM_001025069    | upstream   | 45188   | Hs.475902 | ARPP-21  |
| rs10485661 | 20 | 37858285  | 0.3109 | 93.68% | 0.001620 | 0.131400 | 0.02985000 | 0.14080000 | NM_005461       | downstream | 889617  | Hs.702085 | MAFB     |
| rs7138789  | 12 | 96314350  | 0.0540 | 97.54% | 0.562500 | 0.595800 | 0.02985000 | 0.03044000 | ENST00000384854 | upstream   | 167371  | ---       | ---      |
| rs844604   | 6  | 147966148 | 0.3285 | 96.14% | 0.000927 | 0.008412 | 0.02985000 | 0.10150000 | NM_001030060    | downstream | 33298   | Hs.567973 | SAMD5    |
| rs660717   | 9  | 9559081   | 0.3166 | 90.88% | 0.195800 | 0.307300 | 0.02986000 | 0.02476000 | ENST00000363183 | downstream | 126729  | ---       | ---      |
| rs724053   | 20 | 16933601  | 0.1398 | 97.89% | 0.319000 | 1.000000 | 0.02988000 | 0.08291000 | ENST00000387043 | upstream   | 21923   | ---       | ---      |
| rs1335296  | 6  | 141788521 | 0.0685 | 94.74% | 1.000000 | 0.363800 | 0.02990000 | 0.01428000 | NM_006079       | upstream   | 2051043 | Hs.82071  | CITED2   |
| rs8074693  | 17 | 65321997  | 0.1835 | 97.54% | 1.000000 | 1.000000 | 0.02991000 | 0.20810000 | NM_002758       | downstream | 270930  | Hs.463978 | MAP2K6   |
| rs2877631  | 17 | 50218320  | 0.2670 | 92.63% | 0.272500 | 0.469500 | 0.02994000 | 0.04754000 | NM_005486       | upstream   | 114883  | Hs.153504 | TOMIL1   |
| rs462296   | 3  | 18596143  | 0.2985 | 94.04% | 0.381600 | 0.845300 | 0.02995000 | 0.02856000 | NM_002971       | upstream   | 140935  | Hs.517717 | SATB1    |
| rs6083460  | 20 | 2424631   | 0.3712 | 92.63% | 0.429600 | 1.000000 | 0.02996000 | 0.03599000 | NM_024325       | intron     | 0       | Hs.516846 | ZNF343   |
| rs6933879  | 6  | 22907679  | 0.1278 | 94.74% | 0.407800 | 0.101000 | 0.02997000 | 0.06438000 | ENST00000387548 | upstream   | 108245  | ---       | ---      |
| rs1497997  | 3  | 112666187 | 0.1210 | 88.42% | 0.381200 | 0.343000 | 0.03002000 | 0.02451000 | NM_005816       | upstream   | 77359   | Hs.142023 | CD96     |
| rs10509911 | 10 | 112009678 | 0.0162 | 97.54% | 1.000000 | 1.000000 | 0.03003000 | 0.99790000 | NM_001008541    | intron     | 0       | Hs.501023 | MX11     |
| rs10514850 | 13 | 52649537  | 0.0162 | 97.54% | 0.063640 | 0.098420 | 0.03003000 | 0.99770000 | NM_006418       | downstream | 125350  | Hs.559736 | OLF4     |
| rs7552778  | 1  | 190709879 | 0.0162 | 97.54% | 1.000000 | 1.000000 | 0.03003000 | 0.99780000 | NM_002922       | upstream   | 101601  | Hs.75256  | RGS1     |
| rs10131076 | 14 | 79844138  | 0.1245 | 95.79% | 0.779500 | 0.377100 | 0.03005000 | 0.02303000 | NM_001007023    | upstream   | 96534   | Hs.202354 | DIO2     |
| rs2288383  | 5  | 168947791 | 0.0163 | 96.84% | 1.000000 | 1.000000 | 0.03005000 | 0.99790000 | NM_017785       | intron     | 0       | Hs.368710 | CCDC99   |
| rs6818281  | 4  | 164709149 | 0.4717 | 92.98% | 0.901900 | 1.000000 | 0.03006000 | 0.04973000 | NM_017923       | intron     | 0       | Hs.696248 | 01.Mar   |
| rs7662165  | 4  | 12420925  | 0.3903 | 97.54% | 0.314100 | 0.166600 | 0.03006000 | 0.03092000 | ENST00000387175 | downstream | 497513  | ---       | ---      |
| rs1908638  | 1  | 150415882 | 0.0161 | 97.89% | 0.063420 | 0.097890 | 0.03008000 | 0.99760000 | ENST00000388718 | intron     | 0       | ---       | ---      |
| rs7286017  | 22 | 31091715  | 0.0161 | 97.89% | 1.000000 | 1.000000 | 0.03008000 | 0.99800000 | ENST00000382086 | intron     | 0       | ---       | ---      |
| rs967016   | 2  | 83548442  | 0.3907 | 97.89% | 0.381300 | 0.283900 | 0.03009000 | 0.01955000 | ENST00000362425 | upstream   | 189928  | ---       | ---      |
| rs3816013  | 5  | 146761633 | 0.3975 | 97.54% | 0.133400 | 0.256600 | 0.03010000 | 0.27720000 | NM_001387       | intron     | 0       | Hs.519659 | DPYSL3   |
| rs8091945  | 18 | 59680510  | 0.4109 | 90.53% | 0.701000 | 0.623700 | 0.03012000 | 0.08569000 | NM_002575       | upstream   | 25412   | Hs.594481 | SERPINB2 |
| rs1483822  | 8  | 24001297  | 0.0360 | 97.54% | 0.040900 | 1.000000 | 0.03013000 | 0.12000000 | NM_021777       | upstream   | 206268  | Hs.174030 | ADAM28   |
| rs719395   | 6  | 52398886  | 0.3297 | 96.84% | 0.587200 | 0.415100 | 0.03013000 | 0.02537000 | NM_018100       | intron     | 0       | Hs.403171 | EFHC1    |
| rs10516388 | 4  | 21086690  | 0.0712 | 91.23% | 0.373700 | 0.376100 | 0.03014000 | 0.05409000 | NM_025221       | intron     | 0       | Hs.655705 | KCNIP4   |
| rs4239162  | 17 | 43110809  | 0.4618 | 87.37% | 0.160200 | 0.038980 | 0.03014000 | 0.03736000 | NM_002265       | intron     | 0       | Hs.532793 | KPNB1    |
| rs10506435 | 12 | 60725172  | 0.1122 | 92.28% | 0.029250 | 0.033050 | 0.03015000 | 0.03874000 | NM_178539       | upstream   | 21343   | Hs.269745 | FAM19A2  |
| rs10520111 | 15 | 36896223  | 0.2437 | 97.19% | 0.049080 | 0.076970 | 0.03015000 | 0.13720000 | NM_207444       | downstream | 116692  | Hs.448785 | C15orf53 |
| rs1337987  | 10 | 113528178 | 0.4272 | 94.04% | 0.803200 | 0.758100 | 0.03015000 | 0.07312000 | NM_020918       | downstream | 371436  | Hs.42586  | GPAM     |
| rs10508244 | 10 | 3143203   | 0.1236 | 96.49% | 1.000000 | 0.679600 | 0.03016000 | 0.12360000 | NM_002627       | intron     | 0       | Hs.26010  | PFKP     |
| rs4363467  | 1  | 17459240  | 0.1220 | 87.72% | 1.000000 | 0.367900 | 0.03018000 | 0.00644200 | NM_016233       | intron     | 0       | Hs.149195 | PADI3    |
| rs10492507 | 13 | 48722291  | 0.2039 | 81.75% | 0.161800 | 0.370300 | 0.03019000 | 0.08177000 | NM_030911       | intron     | 0       | Hs.388220 | CDADC1   |
| rs2243385  | 6  | 117770192 | 0.1115 | 94.39% | 1.000000 | 1.000000 | 0.03019000 | 0.08216000 | NM_002944       | intron     | 0       | Hs.1041   | ROS1     |
| rs9285165  | 13 | 47591998  | 0.1488 | 84.91% | 0.199900 | 0.098630 | 0.03019000 | 0.04613000 | NM_014166       | upstream   | 24757   | Hs.181112 | MED4     |
| rs10516215 | 4  | 10487213  | 0.2603 | 93.68% | 0.752000 | 0.673600 | 0.03021000 | 0.04954000 | NM_052964       | upstream   | 191729  | Hs.678910 | MIST     |
| rs1079032  | 18 | 6554219   | 0.1474 | 94.04% | 0.812000 | 0.727100 | 0.03021000 | 0.00614500 | ENST00000386846 | upstream   | 37320   | ---       | ---      |
| rs3764703  | 20 | 37077073  | 0.4076 | 96.84% | 0.708900 | 0.747600 | 0.03022000 | 0.01953000 | NM_021931       | intron     | 0       | Hs.444520 | DHX35    |
| rs10502526 | 18 | 24852634  | 0.2889 | 94.74% | 0.301800 | 0.159500 | 0.03023000 | 0.03521000 | NM_001792       | upstream   | 841445  | Hs.464829 | CDH2     |
| rs3775442  | 4  | 90934254  | 0.1097 | 94.39% | 1.000000 | 1.000000 | 0.03023000 | 0.01964000 | NM_000345       | intron     | 0       | Hs.271771 | SNCA     |
| rs254487   | 5  | 52483969  | 0.1223 | 97.54% | 0.153500 | 0.225500 | 0.03025000 | 0.02444000 | NM_004531       | upstream   | 42633   | Hs.163645 | MOCS2    |
| rs9293254  | 5  | 26985148  | 0.0166 | 95.09% | 0.001280 | 0.003061 | 0.03025000 | 0.99780000 | NM_016279       | intron     | 0       | Hs.272212 | CDH9     |
| rs2393220  | 10 | 58501127  | 0.0171 | 92.28% | 1.000000 | 1.000000 | 0.03026000 | 0.99790000 | NM_001005414    | upstream   | 710085  | ---       | ZWINT    |

|            |    |           |        |        |          |          |            |            |                 |            |         |           |           |
|------------|----|-----------|--------|--------|----------|----------|------------|------------|-----------------|------------|---------|-----------|-----------|
| rs2397429  | 6  | 100263963 | 0.1860 | 87.72% | 0.206600 | 0.768300 | 0.03026000 | 0.16260000 | NM_032503       | downstream | 210544  | Hs.591342 | MCHR2     |
| rs274460   | 12 | 58238608  | 0.1828 | 97.89% | 0.546100 | 0.650800 | 0.03026000 | 0.01035000 | ENST00000365601 | downstream | 28233   | ---       | ---       |
| rs797002   | 6  | 119393692 | 0.0551 | 95.44% | 1.000000 | 1.000000 | 0.03026000 | 0.09530000 | NM_024581       | intron     | 0       | Hs.443789 | C6orf60   |
| rs1395771  | 3  | 97946270  | 0.2531 | 85.96% | 0.174700 | 0.117200 | 0.03031000 | 0.07496000 | ENST00000341636 | upstream   | 32521   | ---       | ---       |
| rs2372648  | 12 | 98085110  | 0.3978 | 97.89% | 0.707600 | 0.746300 | 0.03031000 | 0.04648000 | NM_020140       | intron     | 0       | Hs.506458 | ANKS1B    |
| rs10491403 | 5  | 146535383 | 0.1111 | 94.74% | 1.000000 | 1.000000 | 0.03032000 | 0.12780000 | NM_145001       | upstream   | 59336   | Hs.697853 | STK32A    |
| rs2362330  | 4  | 71900310  | 0.0899 | 97.54% | 1.000000 | 1.000000 | 0.03032000 | 0.15920000 | NM_002092       | downstream | 3804    | Hs.309763 | GRSF1     |
| rs3024896  | 2  | 191604961 | 0.1111 | 94.74% | 0.346200 | 0.516300 | 0.03032000 | 0.05695000 | NM_003151       | intron     | 0       | Hs.80642  | STAT4     |
| rs6514066  | 20 | 43934201  | 0.3574 | 94.74% | 0.791100 | 0.874700 | 0.03032000 | 0.15970000 | NM_080752       | intron     | 0       | Hs.292135 | ZSWIM3    |
| rs10517903 | 4  | 167948429 | 0.2621 | 94.39% | 0.083670 | 0.717900 | 0.03033000 | 0.02969000 | NM_016950       | intron     | 0       | Hs.481133 | SPOCK3    |
| rs10491707 | 9  | 2343522   | 0.1685 | 93.68% | 0.076520 | 0.109100 | 0.03034000 | 0.05217000 | NM_003070       | downstream | 159898  | Hs.298990 | SMARCA2   |
| rs10518874 | 15 | 34446099  | 0.3648 | 94.74% | 0.148400 | 0.083640 | 0.03038000 | 0.01814000 | NM_080650       | upstream   | 820443  | Hs.107196 | ATPBD4    |
| rs10510864 | 3  | 61180878  | 0.2115 | 97.89% | 1.000000 | 1.000000 | 0.03039000 | 0.03932000 | NM_002841       | upstream   | 342124  | Hs.654488 | PTPRG     |
| rs2622542  | 8  | 56479295  | 0.4163 | 81.75% | 0.500900 | 0.745000 | 0.03040000 | 0.11670000 | NM_052898       | intron     | 0       | Hs.130197 | XKR4      |
| rs10511001 | 3  | 70715884  | 0.2419 | 97.19% | 0.070090 | 0.072260 | 0.03041000 | 0.04237000 | NM_001013679    | downstream | 31111   | ---       | ---       |
| rs340881   | 1  | 212215651 | 0.1227 | 97.19% | 0.020420 | 0.225200 | 0.03041000 | 0.04949000 | NM_002763       | upstream   | 12832   | Hs.585369 | PROX1     |
| rs939628   | 2  | 78718842  | 0.3788 | 92.63% | 0.896100 | 0.875100 | 0.03044000 | 0.05173000 | ENST00000325094 | upstream   | 225301  | ---       | ---       |
| rs10502581 | 18 | 27884067  | 0.0165 | 95.79% | 1.000000 | 1.000000 | 0.03045000 | 0.99770000 | NM_017831       | intron     | 0       | Hs.633703 | RNF125    |
| rs9293370  | 5  | 83694245  | 0.3281 | 89.82% | 0.672300 | 0.500600 | 0.03046000 | 0.00613900 | NM_005711       | intron     | 0       | Hs.482730 | EDIL3     |
| rs3851564  | 10 | 126937238 | 0.1132 | 92.98% | 1.000000 | 1.000000 | 0.03047000 | 0.01573000 | ENST00000316750 | upstream   | 31426   | ---       | ---       |
| rs1339593  | 1  | 191174886 | 0.1107 | 95.09% | 0.345400 | 0.196400 | 0.03053000 | 0.01138000 | NM_015984       | downstream | 76626   | Hs.591458 | UCHL5     |
| rs9307014  | 4  | 87171711  | 0.1107 | 95.09% | 0.220000 | 0.319300 | 0.03053000 | 0.11810000 | NM_138981       | intron     | 0       | Hs.125503 | MAPK10    |
| rs2391704  | 7  | 28912352  | 0.0843 | 91.58% | 0.231800 | 1.000000 | 0.03054000 | 0.13170000 | NM_014817       | downstream | 49400   | Hs.21572  | KIAA0644  |
| rs1424125  | 16 | 6002554   | 0.2520 | 89.12% | 0.098540 | 0.127100 | 0.03055000 | 0.00821400 | NM_001013705    | upstream   | 365211  | ---       | LOC440337 |
| rs9319281  | 13 | 25680887  | 0.2738 | 92.28% | 1.000000 | 0.533700 | 0.03055000 | 0.05209000 | NM_183045       | intron     | 0       | ---       | RNF6      |
| rs509946   | 6  | 52411949  | 0.3400 | 87.72% | 0.090980 | 0.028990 | 0.03056000 | 0.02827000 | NM_018100       | intron     | 0       | Hs.403171 | EFHC1     |
| rs1352968  | 4  | 167586459 | 0.0484 | 90.53% | 0.108900 | 0.008503 | 0.03057000 | 0.04322000 | NM_016950       | downstream | 304708  | Hs.481133 | SPOCK3    |
| rs1827358  | 5  | 22599756  | 0.3462 | 95.79% | 0.422000 | 0.218100 | 0.03058000 | 0.04929000 | NM_004061       | intron     | 0       | Hs.113684 | CDH12     |
| rs2150696  | 9  | 12454876  | 0.3811 | 92.98% | 0.896700 | 0.867200 | 0.03058000 | 0.02545000 | NM_000550       | upstream   | 228559  | Hs.270279 | TYRP1     |
| rs2220390  | 1  | 152499640 | 0.3345 | 96.49% | 0.786400 | 0.745200 | 0.03058000 | 0.00489200 | NM_014847       | intron     | 0       | Hs.490551 | UBAP2L    |
| rs2325528  | 6  | 94568196  | 0.3993 | 97.54% | 0.900500 | 0.517400 | 0.03060000 | 0.08712000 | NM_004440       | upstream   | 382203  | Hs.73962  | EPHA7     |
| rs1854227  | 13 | 97036437  | 0.2446 | 97.54% | 0.628900 | 0.574600 | 0.03061000 | 0.09839000 | NM_021033       | downstream | 118194  | Hs.508480 | RAP2A     |
| rs6859245  | 5  | 125204151 | 0.4963 | 94.04% | 0.271200 | 0.171400 | 0.03061000 | 0.02133000 | NM_023927       | upstream   | 582849  | Hs.363558 | GRAMD3    |
| rs10505299 | 8  | 118495921 | 0.1157 | 89.47% | 0.546900 | 0.365300 | 0.03063000 | 0.02093000 | NM_080651       | upstream   | 106290  | Hs.492612 | MED30     |
| rs10493244 | 1  | 58379054  | 0.1506 | 94.39% | 1.000000 | 0.318900 | 0.03064000 | 0.08327000 | NM_021080       | intron     | 0       | Hs.477370 | DAB1      |
| rs6604659  | 1  | 215459562 | 0.0690 | 94.04% | 0.117600 | 0.062750 | 0.03064000 | 0.01871000 | NM_206595       | upstream   | 129992  | Hs.444225 | ESRRG     |
| rs10502079 | 11 | 106224087 | 0.1756 | 91.93% | 0.001104 | 0.003497 | 0.03065000 | 0.02118000 | NM_000855       | intron     | 0       | Hs.654555 | GUCY1A2   |
| rs995830   | 3  | 69684474  | 0.1648 | 95.79% | 0.024860 | 0.027700 | 0.03065000 | 0.21980000 | NM_198178       | upstream   | 211178  | Hs.166017 | MITF      |
| rs10496837 | 2  | 140668940 | 0.3694 | 94.04% | 0.008453 | 0.007510 | 0.03066000 | 0.04453000 | ENST00000385554 | upstream   | 22351   | ---       | ---       |
| rs3861571  | 2  | 55435740  | 0.0172 | 91.58% | 1.000000 | 1.000000 | 0.03066000 | 0.99800000 | NM_018084       | intron     | 0       | Hs.292925 | CCDC88A   |
| rs10496121 | 2  | 64652930  | 0.0815 | 94.74% | 0.690800 | 1.000000 | 0.03067000 | 0.02252000 | NM_001002243    | intron     | 0       | Hs.655167 | AFTPH     |
| rs10501019 | 11 | 25686846  | 0.2097 | 97.89% | 0.586800 | 0.613500 | 0.03067000 | 0.06454000 | NM_031418       | upstream   | 622701  | Hs.91791  | TMEM16C   |
| rs724098   | 15 | 37560051  | 0.2097 | 97.89% | 0.364700 | 0.312100 | 0.03067000 | 0.11210000 | NM_003246       | upstream   | 100521  | Hs.164226 | THBS1     |
| rs10499653 | 7  | 47112349  | 0.1421 | 97.54% | 0.621500 | 0.474800 | 0.03068000 | 0.10960000 | NM_022748       | downstream | 168930  | Hs.520814 | TNS3      |
| rs10506388 | 12 | 57021115  | 0.1387 | 89.82% | 0.114400 | 0.395500 | 0.03068000 | 0.04983000 | NM_153377       | downstream | 531090  | Hs.253736 | LRIG3     |
| rs1327272  | 6  | 51336858  | 0.1421 | 97.54% | 1.000000 | 1.000000 | 0.03068000 | 0.02776000 | ENST00000320956 | downstream | 45980   | ---       | ---       |
| rs10484242 | 14 | 43329259  | 0.1643 | 97.19% | 0.662900 | 1.000000 | 0.03071000 | 0.04344000 | NM_152447       | downstream | 1885761 | Hs.136893 | LRFN5     |
| rs517425   | 18 | 4375309   | 0.0228 | 92.28% | 0.005217 | 1.000000 | 0.03074000 | 0.03235000 | ENST00000384548 | upstream   | 490504  | ---       | ---       |
| rs959702   | 10 | 2139260   | 0.2259 | 94.74% | 1.000000 | 0.552700 | 0.03074000 | 0.04399000 | NM_018702       | upstream   | 369590  | Hs.657984 | ADARB2    |
| rs486975   | 11 | 93709139  | 0.3699 | 94.39% | 0.190600 | 0.209400 | 0.03075000 | 0.06747000 | NM_016540       | downstream | 40992   | Hs.272385 | GPR83     |
| rs7184633  | 16 | 81379514  | 0.4428 | 95.09% | 0.902000 | 0.875300 | 0.03075000 | 0.02545000 | NM_001257       | upstream   | 69946   | Hs.654386 | CDH13     |
| rs1414483  | 1  | 76520348  | 0.1216 | 89.47% | 1.000000 | 1.000000 | 0.03076000 | 0.07896000 | NM_152996       | intron     | 0       | Hs.337040 | ST6GALNAC |
| rs10483513 | 14 | 39556095  | 0.1057 | 97.89% | 0.526100 | 0.349400 | 0.03077000 | 0.10100000 | NM_203301       | upstream   | 584724  | Hs.324342 | FBXO33    |
| rs1341734  | 9  | 15753124  | 0.3143 | 85.96% | 0.377400 | 0.080340 | 0.03077000 | 0.10660000 | NM_173550       | intron     | 0       | Hs.17267  | C9orf93   |

|            |    |           |        |        |          |          |            |            |                 |            |         |           |          |
|------------|----|-----------|--------|--------|----------|----------|------------|------------|-----------------|------------|---------|-----------|----------|
| rs1483821  | 8  | 24001333  | 0.0358 | 97.89% | 0.040620 | 1.000000 | 0.03079000 | 0.12470000 | NM_021777       | upstream   | 206232  | Hs.174030 | ADAM28   |
| rs2106970  | 12 | 111158740 | 0.1440 | 87.72% | 0.067040 | 0.475600 | 0.03080000 | 0.04486000 | ENST00000377563 | intron     | 0       | ---       | ---      |
| rs721912   | 3  | 172643128 | 0.2419 | 97.89% | 0.624000 | 0.077350 | 0.03080000 | 0.20240000 | NM_015028       | intron     | 0       | Hs.34024  | TNIK     |
| rs10488991 | 4  | 11186234  | 0.1476 | 95.09% | 0.811600 | 0.301800 | 0.03083000 | 0.05884000 | NM_005114       | upstream   | 145747  | Hs.507348 | HS3ST1   |
| rs7996544  | 13 | 45088338  | 0.1877 | 97.19% | 0.112400 | 0.404900 | 0.03083000 | 0.06148000 | NM_152719       | upstream   | 86109   | Hs.186363 | SPERT    |
| rs10486048 | 7  | 14210927  | 0.2316 | 85.61% | 0.045950 | 0.023730 | 0.03085000 | 0.06788000 | NM_145695       | intron     | 0       | Hs.567255 | DGKB     |
| rs261008   | 5  | 169271614 | 0.3333 | 96.84% | 0.587600 | 0.872500 | 0.03086000 | 0.24840000 | NM_004946       | intron     | 0       | Hs.586174 | DOCK2    |
| rs10483160 | 22 | 30407247  | 0.0168 | 94.04% | 0.065970 | 0.100100 | 0.03087000 | 0.99780000 | NM_173566       | intron     | 0       | Hs.438906 | C22orf30 |
| rs7150974  | 14 | 78958125  | 0.3273 | 97.54% | 0.275500 | 0.048340 | 0.03087000 | 0.07618000 | NM_138970       | intron     | 0       | Hs.368307 | NRXN3    |
| rs10493701 | 1  | 81919788  | 0.3074 | 94.74% | 0.318800 | 0.240200 | 0.03091000 | 0.29210000 | ENST00000370721 | intron     | 0       | ---       | ---      |
| rs2604532  | 11 | 101655698 | 0.3074 | 94.74% | 0.775000 | 0.738400 | 0.03091000 | 0.04088000 | NM_006106       | downstream | 46342   | Hs.503692 | YAP1     |
| rs10493001 | 1  | 20973503  | 0.0948 | 94.39% | 1.000000 | 0.602500 | 0.03092000 | 0.05055000 | NM_016287       | intron     | 0       | Hs.142442 | HP1BP3   |
| rs10513954 | 18 | 64928523  | 0.0173 | 91.23% | 0.067960 | 0.102900 | 0.03092000 | 0.99780000 | NM_152721       | upstream   | 290748  | Hs.569915 | DOK6     |
| rs1094199  | 8  | 89538530  | 0.0173 | 91.23% | 0.067960 | 0.102900 | 0.03092000 | 0.99790000 | NM_003821       | upstream   | 1300643 | Hs.103755 | RIPK2    |
| rs722366   | 6  | 106080157 | 0.3388 | 96.84% | 0.590600 | 1.000000 | 0.03092000 | 0.14000000 | NM_002726       | upstream   | 122495  | Hs.436564 | PREP     |
| rs534731   | 9  | 119642451 | 0.3359 | 90.88% | 0.003297 | 0.013230 | 0.03093000 | 0.02976000 | NM_138554       | downstream | 123481  | Hs.174312 | TLR4     |
| rs907808   | 15 | 97097777  | 0.3093 | 94.74% | 0.568700 | 0.707100 | 0.03093000 | 0.01940000 | NM_000875       | intron     | 0       | Hs.698330 | IGFIR    |
| rs723631   | 7  | 86239528  | 0.2133 | 97.89% | 0.377700 | 0.324100 | 0.03096000 | 0.03535000 | NM_000840       | intron     | 0       | Hs.590575 | GRM3     |
| rs10485011 | 6  | 22714921  | 0.0585 | 92.98% | 1.000000 | 0.602100 | 0.03098000 | 0.00489100 | NM_138574       | downstream | 35047   | Hs.629246 | HDGFL1   |
| rs10487557 | 7  | 155689355 | 0.0556 | 82.11% | 1.000000 | 1.000000 | 0.03099000 | 0.09129000 | NM_032625       | downstream | 435611  | ---       | C7orf13  |
| rs10514263 | 5  | 834226017 | 0.0647 | 97.54% | 0.614000 | 1.000000 | 0.03099000 | 0.06053000 | NM_005711       | intron     | 0       | Hs.482730 | EDIL3    |
| rs6005907  | 22 | 27557971  | 0.1187 | 90.18% | 0.000000 | 0.001073 | 0.03099000 | 0.10230000 | NM_005080       | upstream   | 31411   | Hs.437638 | XBP1     |
| rs10520018 | 15 | 33715161  | 0.0475 | 92.28% | 1.000000 | 1.000000 | 0.03100000 | 0.00815000 | NM_080650       | upstream   | 89505   | Hs.107196 | ATPBD4   |
| rs738283   | 22 | 35167066  | 0.0291 | 96.49% | 0.201100 | 1.000000 | 0.03100000 | 0.09546000 | NM_012473       | downstream | 25973   | Hs.211929 | TXN2     |
| rs10506525 | 12 | 64069645  | 0.2007 | 94.39% | 0.252500 | 0.520800 | 0.03101000 | 0.03215000 | NM_001031679    | intron     | 0       | Hs.339024 | MSRB3    |
| rs10501385 | 11 | 59981058  | 0.0167 | 94.39% | 1.000000 | 1.000000 | 0.03102000 | 0.99800000 | NM_021950       | intron     | 0       | Hs.438040 | MS4A1    |
| rs9298792  | 9  | 18370943  | 0.4203 | 96.84% | 0.267800 | 0.761600 | 0.03103000 | 0.05422000 | NM_052866       | upstream   | 93156   | Hs.522019 | ADAMTSL1 |
| rs10495979 | 2  | 49725943  | 0.1649 | 96.84% | 0.826800 | 0.536200 | 0.03105000 | 0.04650000 | ENST00000388647 | downstream | 243567  | ---       | ---      |
| rs2645466  | 17 | 55207996  | 0.3217 | 90.53% | 0.391400 | 0.349400 | 0.03108000 | 0.07099000 | NM_030938       | intron     | 0       | Hs.444569 | TMEM49   |
| rs10511434 | 9  | 2104024   | 0.1524 | 94.39% | 0.642400 | 0.490700 | 0.03109000 | 0.02397000 | NM_003070       | intron     | 0       | Hs.298990 | SMARCA2  |
| rs10496310 | 2  | 84478534  | 0.0167 | 94.74% | 1.000000 | 1.000000 | 0.03118000 | 0.99790000 | NM_003849       | downstream | 25660   | Hs.270428 | SUCLG1   |
| rs10496311 | 2  | 84478766  | 0.0167 | 94.74% | 1.000000 | 1.000000 | 0.03118000 | 0.99790000 | NM_003849       | downstream | 25428   | Hs.270428 | SUCLG1   |
| rs6555016  | 5  | 1892458   | 0.0360 | 97.54% | 1.000000 | 1.000000 | 0.03118000 | 0.04289000 | NM_004553       | downstream | 9848    | Hs.408257 | NDUFS6   |
| rs1376757  | 2  | 161300495 | 0.0914 | 97.89% | 0.144300 | 0.134400 | 0.03119000 | 0.10480000 | NM_002897       | upstream   | 241944  | Hs.470412 | RBMS1    |
| rs10483549 | 14 | 44403776  | 0.0574 | 94.74% | 0.598800 | 1.000000 | 0.03120000 | 0.07768000 | NM_001017923    | upstream   | 32481   | Hs.82098  | C14orf28 |
| rs10482914 | 21 | 21244794  | 0.0308 | 91.23% | 0.211700 | 1.000000 | 0.03121000 | 0.01164000 | NM_004540       | upstream   | 329973  | Hs.473450 | NCAM2    |
| rs898165   | 6  | 21316408  | 0.1401 | 90.18% | 0.796200 | 0.575400 | 0.03122000 | 0.05723000 | NM_017774       | intron     | 0       | Hs.657604 | CDKAL1   |
| rs6732705  | 2  | 56763256  | 0.4817 | 95.79% | 0.182500 | 0.451800 | 0.03123000 | 0.03858000 | NM_006296       | upstream   | 1363968 | Hs.631890 | VRK2     |
| rs725235   | 6  | 152695457 | 0.0662 | 95.44% | 0.326000 | 0.333000 | 0.03123000 | 0.08183000 | NM_033071       | intron     | 0       | Hs.12967  | SYNE1    |
| rs1022378  | 2  | 21910174  | 0.3685 | 94.74% | 0.190300 | 0.042590 | 0.03125000 | 0.01266000 | ENST00000383859 | upstream   | 89196   | ---       | ---      |
| rs9323834  | 14 | 88405366  | 0.1930 | 95.44% | 0.247300 | 0.273600 | 0.03125000 | 0.07920000 | NM_198310       | intron     | 0       | Hs.303055 | TTC8     |
| rs10487088 | 7  | 89408405  | 0.1147 | 93.33% | 0.220900 | 1.000000 | 0.03126000 | 0.13750000 | ENST00000317128 | upstream   | 178245  | ---       | ---      |
| rs9312259  | 4  | 181363535 | 0.1315 | 94.74% | 0.791300 | 0.575700 | 0.03126000 | 0.06889000 | ENST00000385763 | downstream | 279419  | ---       | ---      |
| rs1886356  | 6  | 150535548 | 0.3943 | 86.32% | 0.044840 | 0.126100 | 0.03128000 | 0.14830000 | NM_030949       | intron     | 0       | Hs.486798 | PPP1R14C |
| rs224938   | 5  | 81752932  | 0.4485 | 95.44% | 0.623800 | 0.291000 | 0.03128000 | 0.02826000 | NM_001039779    | downstream | 34841   | ---       | FLJ41309 |
| rs10500381 | 16 | 12065401  | 0.4309 | 96.49% | 0.538500 | 0.763600 | 0.03129000 | 0.10600000 | NM_032167       | downstream | 10759   | Hs.458401 | RUNC2A   |
| rs1490901  | 4  | 112377247 | 0.2870 | 97.19% | 0.378000 | 0.330500 | 0.03130000 | 0.02362000 | NM_000325       | upstream   | 613544  | Hs.643588 | PITX2    |
| rs10485530 | 20 | 15508116  | 0.0967 | 94.39% | 0.722800 | 1.000000 | 0.03132000 | 0.03347000 | NM_001033086    | intron     | 0       | ---       | MACROD2  |
| rs10494785 | 1  | 197428385 | 0.4833 | 94.74% | 0.225300 | 0.758400 | 0.03132000 | 0.04118000 | ENST00000312868 | downstream | 242806  | ---       | ---      |
| rs10502042 | 11 | 104096976 | 0.4221 | 96.84% | 0.623600 | 0.172800 | 0.03132000 | 0.03742000 | ENST00000375726 | downstream | 164900  | ---       | ---      |
| rs1903154  | 8  | 21140781  | 0.0967 | 94.39% | 0.722800 | 1.000000 | 0.03132000 | 0.10380000 | ENST00000387614 | upstream   | 359471  | ---       | ---      |
| rs438016   | 20 | 15040594  | 0.1864 | 97.89% | 0.233200 | 0.403000 | 0.03132000 | 0.08922000 | NM_001033086    | intron     | 0       | ---       | MACROD2  |
| rs1485741  | 8  | 25974937  | 0.0572 | 95.09% | 1.000000 | 0.603100 | 0.03134000 | 0.16220000 | ENST00000380737 | intron     | 0       | ---       | ---      |
| rs4464906  | 7  | 81111692  | 0.2140 | 97.54% | 0.031300 | 0.142900 | 0.03134000 | 0.01467000 | NM_001010934    | downstream | 54566   | Hs.396530 | HGF      |

|            |    |           |        |        |          |          |            |            |                 |            |         |           |          |
|------------|----|-----------|--------|--------|----------|----------|------------|------------|-----------------|------------|---------|-----------|----------|
| rs1154961  | 8  | 123154424 | 0.0166 | 95.09% | 1.000000 | 1.000000 | 0.03135000 | 0.99810000 | NM_005328       | upstream   | 431613  | Hs.571528 | HAS2     |
| rs1448730  | 4  | 190034153 | 0.0166 | 95.09% | 1.000000 | 1.000000 | 0.03135000 | 0.99790000 | ENST00000321235 | downstream | 136701  | ---       | ---      |
| rs2155786  | 18 | 28701558  | 0.0166 | 95.09% | 1.000000 | 1.000000 | 0.03135000 | 0.99770000 | NM_198995       | downstream | 70029   | Hs.115461 | C18orf34 |
| rs2788862  | 4  | 25978818  | 0.0166 | 95.09% | 1.000000 | 1.000000 | 0.03135000 | 0.99790000 | NM_203284       | intron     | 0       | Hs.479396 | RBPJ     |
| rs7524644  | 1  | 119568206 | 0.0166 | 95.09% | 1.000000 | 1.000000 | 0.03135000 | 0.99790000 | NM_015836       | upstream   | 83389   | Hs.523506 | WARS2    |
| rs6917477  | 6  | 30133963  | 0.0896 | 97.89% | 0.708800 | 1.000000 | 0.03138000 | 0.06683000 | NM_014596       | upstream   | 3052    | Hs.57813  | ZNRD1    |
| rs988102   | 18 | 37687927  | 0.5000 | 89.12% | 0.060450 | 0.121000 | 0.03138000 | 0.11730000 | NM_002647       | upstream   | 101270  | Hs.464971 | PIK3C3   |
| rs2889921  | 1  | 220406261 | 0.4915 | 82.11% | 0.090220 | 0.335300 | 0.03140000 | 0.02460000 | ENST00000355775 | downstream | 114125  | ---       | ---      |
| rs6760096  | 2  | 151628484 | 0.1447 | 95.79% | 1.000000 | 0.788800 | 0.03140000 | 0.05916000 | NM_198557       | downstream | 185672  | Hs.302442 | RBM43    |
| rs1359932  | 6  | 97436898  | 0.4188 | 97.19% | 0.216600 | 0.527700 | 0.03142000 | 0.15780000 | NM_014165       | downstream | 7012    | Hs.591333 | C6orf66  |
| rs893884   | 3  | 144050273 | 0.4723 | 88.77% | 0.166100 | 0.635900 | 0.03146000 | 0.17340000 | NM_013363       | intron     | 0       | Hs.8944   | PCOLCE2  |
| rs9300422  | 13 | 97021321  | 0.3141 | 94.39% | 0.888000 | 0.510500 | 0.03149000 | 0.05853000 | NM_021033       | downstream | 103078  | Hs.508480 | RAP2A    |
| rs1560106  | 16 | 12616051  | 0.2374 | 83.51% | 0.857900 | 1.000000 | 0.03150000 | 0.04315000 | NM_018340       | downstream | 48387   | Hs.460002 | FLJ11151 |
| rs11076556 | 16 | 49712544  | 0.0927 | 96.49% | 0.714200 | 1.000000 | 0.03151000 | 0.01102000 | NM_002968       | downstream | 15286   | Hs.135787 | SALL1    |
| rs1029181  | 6  | 141790162 | 0.0650 | 97.19% | 1.000000 | 0.330200 | 0.03152000 | 0.01732000 | NM_006079       | upstream   | 2052684 | Hs.82071  | CITED2   |
| rs10489364 | 1  | 167134224 | 0.4278 | 97.19% | 0.902800 | 0.639600 | 0.03153000 | 0.01937000 | NM_001937       | upstream   | 169098  | Hs.80552  | DPY19C   |
| rs2419914  | 5  | 157777464 | 0.2906 | 97.19% | 0.307900 | 0.434000 | 0.03153000 | 0.05314000 | NM_024007       | downstream | 281233  | Hs.657753 | EBF1     |
| rs185357   | 5  | 5808783   | 0.4763 | 88.77% | 0.032180 | 0.086140 | 0.03156000 | 0.05891000 | NM_001001702    | downstream | 556700  | Hs.376760 | FLJ33360 |
| rs10491832 | 9  | 24709895  | 0.4176 | 97.89% | 0.902700 | 0.530100 | 0.03157000 | 0.02758000 | ENST00000380098 | upstream   | 175660  | ---       | ---      |
| rs2409411  | 21 | 31842275  | 0.4176 | 97.89% | 1.000000 | 0.428400 | 0.03157000 | 0.01298000 | NM_003253       | intron     | 0       | Hs.517228 | TIAM1    |
| rs3107648  | 8  | 104391979 | 0.1749 | 92.28% | 0.394000 | 0.370600 | 0.03157000 | 0.05737000 | NM_003506       | intron     | 0       | Hs.591863 | FZD6     |
| rs6135343  | 20 | 15060292  | 0.2878 | 97.54% | 0.559800 | 0.330500 | 0.03159000 | 0.06872000 | NM_001033086    | intron     | 0       | ---       | MACROD2  |
| rs10493164 | 1  | 52491469  | 0.0361 | 97.19% | 0.299200 | 1.000000 | 0.03160000 | 0.27240000 | NM_004799       | intron     | 0       | Hs.532345 | ZFYVE9   |
| rs8042622  | 15 | 52692250  | 0.1170 | 92.98% | 0.003788 | 0.180300 | 0.03160000 | 0.09402000 | ENST00000260323 | intron     | 0       | ---       | ---      |
| rs1293135  | 20 | 52360876  | 0.4261 | 90.18% | 0.073620 | 0.088140 | 0.03164000 | 0.10120000 | NM_018431       | upstream   | 164712  | Hs.656582 | DOK5     |
| rs9309437  | 2  | 25956101  | 0.4196 | 89.47% | 0.157400 | 0.868500 | 0.03165000 | 0.00710400 | NM_018263       | upstream   | 1262    | Hs.700650 | ASXL2    |
| rs4897047  | 6  | 125894320 | 0.3264 | 92.98% | 0.484400 | 0.742100 | 0.03168000 | 0.00377700 | NM_012259       | upstream   | 218099  | Hs.144287 | HEY2     |
| rs147959   | 8  | 116469762 | 0.1974 | 95.09% | 0.000444 | 0.002065 | 0.03170000 | 0.00323700 | NM_014112       | downstream | 24209   | Hs.657018 | TRPS1    |
| rs1709084  | 19 | 46294310  | 0.0970 | 94.04% | 0.085030 | 1.000000 | 0.03172000 | 0.04236000 | NM_000766       | downstream | 371     | Hs.567252 | CYP2A13  |
| rs1870564  | 3  | 53691841  | 0.2934 | 90.88% | 0.453300 | 0.692500 | 0.03172000 | 0.11940000 | NM_000720       | intron     | 0       | Hs.476358 | CACNA1D  |
| rs719153   | 18 | 5945554   | 0.2667 | 94.74% | 0.085700 | 0.010870 | 0.03173000 | 0.16400000 | ENST00000317931 | 3UTR       | 0       | ---       | ---      |
| rs7748312  | 6  | 38002867  | 0.1186 | 88.77% | 0.012740 | 0.097970 | 0.03175000 | 0.01676000 | NM_021943       | intron     | 0       | Hs.36959  | ZFAND3   |
| rs10495995 | 2  | 50102417  | 0.4191 | 97.54% | 0.389500 | 0.527700 | 0.03177000 | 0.04402000 | NM_138735       | intron     | 0       | Hs.637685 | NRXN1    |
| rs4876877  | 8  | 112837498 | 0.0418 | 88.07% | 1.000000 | 1.000000 | 0.03177000 | 0.03662000 | ENST00000364160 | downstream | 392598  | ---       | ---      |
| rs10492821 | 16 | 71028325  | 0.1444 | 97.19% | 0.475000 | 1.000000 | 0.03178000 | 0.16640000 | ENST00000378742 | downstream | 60042   | ---       | ---      |
| rs10505908 | 12 | 23905336  | 0.3921 | 79.65% | 0.781000 | 0.740400 | 0.03178000 | 0.08281000 | NM_178010       | intron     | 0       | Hs.657542 | SOX5     |
| rs1503160  | 3  | 106287101 | 0.2695 | 94.39% | 1.000000 | 0.679700 | 0.03178000 | 0.10380000 | NM_001627       | upstream   | 281302  | Hs.591293 | ALCAM    |
| rs1834971  | 19 | 33308700  | 0.3148 | 94.74% | 0.157600 | 0.463200 | 0.03178000 | 0.07045000 | ENST00000379373 | upstream   | 479642  | ---       | ---      |
| rs10487396 | 7  | 117722354 | 0.0568 | 95.79% | 0.206500 | 1.000000 | 0.03182000 | 0.11220000 | NM_019644       | downstream | 52377   | Hs.657737 | ANKRD7   |
| rs1560325  | 5  | 97053454  | 0.0992 | 91.93% | 0.486500 | 0.473400 | 0.03182000 | 0.03287000 | ENST00000388601 | downstream | 13241   | ---       | ---      |
| rs454574   | 20 | 15040864  | 0.1871 | 97.54% | 0.233800 | 0.404900 | 0.03184000 | 0.09606000 | NM_001033086    | intron     | 0       | ---       | MACROD2  |
| rs7308694  | 12 | 5686942   | 0.2631 | 94.04% | 0.000058 | 0.000355 | 0.03184000 | 0.07005000 | NM_020373       | intron     | 0       | Hs.148970 | TMEM16B  |
| rs10502872 | 18 | 42364579  | 0.0970 | 94.04% | 0.486000 | 0.602500 | 0.03185000 | 0.09889000 | NM_144612       | intron     | 0       | ---       | LOXHD1   |
| rs10492015 | 12 | 111201383 | 0.1753 | 95.09% | 0.832900 | 0.770400 | 0.03186000 | 0.03136000 | NM_173813       | upstream   | 5443    | ---       | C12orf51 |
| rs2285808  | 12 | 111228156 | 0.1753 | 95.09% | 0.832900 | 0.770400 | 0.03186000 | 0.03136000 | NM_173813       | upstream   | 32216   | ---       | C12orf51 |
| rs963265   | 9  | 72284355  | 0.4332 | 91.93% | 0.165900 | 0.205600 | 0.03186000 | 0.07260000 | NM_001007471    | downstream | 55433   | Hs.47288  | TRPM3    |
| rs967079   | 5  | 28791750  | 0.4209 | 97.54% | 0.624000 | 0.651000 | 0.03186000 | 0.12710000 | ENST00000387488 | downstream | 131121  | ---       | ---      |
| rs10505178 | 8  | 113416432 | 0.1444 | 97.19% | 0.014840 | 0.013610 | 0.03188000 | 0.12460000 | NM_052900       | intron     | 0       | Hs.91381  | CSMD3    |
| rs681511   | 1  | 42073888  | 0.2168 | 97.89% | 0.859900 | 0.316600 | 0.03188000 | 0.07033000 | NM_024503       | intron     | 0       | Hs.591503 | HIVEP3   |
| rs176435   | 6  | 103636845 | 0.0395 | 93.33% | 1.000000 | 1.000000 | 0.03189000 | 0.03042000 | NM_175768       | downstream | 1012194 | Hs.654523 | GRIK2    |
| rs943537   | 9  | 71930214  | 0.3929 | 93.33% | 0.073140 | 0.215500 | 0.03193000 | 0.04558000 | NM_153267       | intron     | 0       | Hs.547172 | MAMDC2   |
| rs9307573  | 4  | 126773338 | 0.4436 | 96.49% | 0.902700 | 0.213000 | 0.03197000 | 0.01070000 | NM_024582       | downstream | 140965  | Hs.702217 | FAT4     |
| rs10493808 | 1  | 88396583  | 0.2657 | 95.09% | 0.353900 | 0.096150 | 0.03198000 | 0.03601000 | ENST00000388450 | downstream | 319516  | ---       | ---      |
| rs2280394  | 16 | 63539534  | 0.3165 | 93.68% | 0.395500 | 0.460300 | 0.03200000 | 0.04894000 | NM_001797       | intron     | 0       | Hs.116471 | CDH11    |



|            |    |           |        |        |          |          |            |            |                 |            |         |           |          |
|------------|----|-----------|--------|--------|----------|----------|------------|------------|-----------------|------------|---------|-----------|----------|
| rs10509715 | 10 | 99724181  | 0.0362 | 96.84% | 0.300100 | 1.000000 | 0.03204000 | 0.04398000 | NM_018058       | intron     | 0       | Hs.500736 | CRTAC1   |
| rs1573366  | 18 | 61107313  | 0.3369 | 97.89% | 0.591600 | 0.381900 | 0.03204000 | 0.01274000 | ENST00000387762 | upstream   | 186416  | ---       | ---      |
| rs2421930  | 2  | 117917574 | 0.0558 | 97.54% | 0.587400 | 0.232200 | 0.03207000 | 0.11120000 | NM_006773       | upstream   | 371151  | Hs.363492 | DDX18    |
| rs205795   | 20 | 55806890  | 0.3770 | 87.02% | 0.498900 | 0.630000 | 0.03208000 | 0.09705000 | NM_199171       | upstream   | 86943   | Hs.517155 | TMEPAI   |
| rs1567967  | 2  | 16332551  | 0.1434 | 97.89% | 0.471900 | 0.592500 | 0.03209000 | 0.05558000 | ENST00000388035 | downstream | 88506   | ---       | ---      |
| rs633485   | 11 | 69130174  | 0.0665 | 97.54% | 0.341400 | 0.352100 | 0.03209000 | 0.01541000 | NM_053056       | upstream   | 34880   | Hs.523852 | CCND1    |
| rs964707   | 7  | 33202823  | 0.1148 | 94.74% | 1.000000 | 0.368600 | 0.03210000 | 0.01088000 | NM_001033605    | intron     | 0       | Hs.372360 | BBS9     |
| rs10504901 | 8  | 91867078  | 0.1321 | 92.98% | 0.590200 | 0.377600 | 0.03211000 | 0.04205000 | NM_022351       | upstream   | 6213    | Hs.560892 | NECAB1   |
| rs1529581  | 3  | 157989601 | 0.0690 | 94.04% | 1.000000 | 1.000000 | 0.03212000 | 0.02596000 | ENST00000314241 | upstream   | 37169   | ---       | ---      |
| rs10507337 | 13 | 24143752  | 0.0668 | 97.19% | 1.000000 | 1.000000 | 0.03213000 | 0.02177000 | NM_001676       | upstream   | 8943    | Hs.147111 | ATP12A   |
| rs10515767 | 5  | 157978895 | 0.0623 | 90.18% | 0.250300 | 0.276800 | 0.03213000 | 0.05267000 | NM_024007       | downstream | 79802   | Hs.657753 | EBF1     |
| rs1884981  | 1  | 34078764  | 0.4850 | 81.75% | 0.793200 | 0.071650 | 0.03213000 | 0.12500000 | NM_052896       | intron     | 0       | Hs.656915 | CSMD2    |
| rs1386290  | 3  | 151354149 | 0.2041 | 93.68% | 0.571100 | 0.673300 | 0.03214000 | 0.00840900 | ENST00000386021 | upstream   | 75841   | ---       | ---      |
| rs10504658 | 8  | 78793709  | 0.0824 | 93.68% | 0.087550 | 0.077020 | 0.03216000 | 0.04677000 | NM_000318       | upstream   | 718802  | Hs.437966 | PXMP3    |
| rs1342705  | 1  | 145720880 | 0.1444 | 97.19% | 0.624200 | 0.593900 | 0.03216000 | 0.10840000 | NM_181703       | upstream   | 8814    | Hs.447968 | GJA5     |
| rs4634109  | 3  | 64267925  | 0.0291 | 96.49% | 0.016760 | 0.042130 | 0.03216000 | 0.10580000 | NM_198859       | upstream   | 81754   | Hs.699317 | PRICKLE2 |
| rs995636   | 20 | 6956824   | 0.2202 | 97.19% | 0.381700 | 0.467300 | 0.03216000 | 0.03890000 | NM_001200       | downstream | 247897  | Hs.73853  | BMP2     |
| rs10488780 | 11 | 79490000  | 0.1938 | 96.84% | 0.248600 | 0.173500 | 0.03217000 | 0.00772600 | ENST00000363276 | upstream   | 426652  | ---       | ---      |
| rs10516770 | 4  | 87391122  | 0.0673 | 96.49% | 0.346500 | 0.354900 | 0.03217000 | 0.10430000 | NM_138981       | intron     | 0       | Hs.125503 | MAPK10   |
| rs3904729  | 10 | 84091786  | 0.2578 | 89.82% | 1.000000 | 0.517100 | 0.03217000 | 0.15500000 | NM_001010848    | intron     | 0       | Hs.125119 | NRG3     |
| rs163482   | 3  | 21538716  | 0.1927 | 96.49% | 0.845900 | 1.000000 | 0.03218000 | 0.06240000 | NM_024697       | intron     | 0       | Hs.21026  | ZNF385D  |
| rs2303554  | 2  | 182501229 | 0.0225 | 70.18% | 1.000000 | 1.000000 | 0.03218000 | 0.99800000 | NM_006751       | intron     | 0       | Hs.591602 | SSFA2    |
| rs2421542  | 2  | 125916248 | 0.3007 | 95.09% | 0.885500 | 0.845500 | 0.03218000 | 0.00134800 | NM_016815       | upstream   | 1248296 | Hs.59138  | GYPC     |
| rs2458439  | 12 | 69495562  | 0.1927 | 96.49% | 0.444300 | 0.267400 | 0.03218000 | 0.12450000 | NM_002849       | intron     | 0       | Hs.506076 | PTPRR    |
| rs647908   | 1  | 214171349 | 0.1330 | 93.68% | 0.104400 | 0.035120 | 0.03218000 | 0.01524000 | NM_206933       | intron     | 0       | Hs.655974 | USH2A    |
| rs9294558  | 6  | 93869536  | 0.0800 | 96.49% | 0.685800 | 0.679600 | 0.03219000 | 0.02356000 | NM_004440       | downstream | 138328  | Hs.73962  | EPHA7    |
| rs223128   | 17 | 26933541  | 0.3093 | 94.74% | 0.670400 | 0.502100 | 0.03221000 | 0.17110000 | ENST00000362317 | downstream | 6888    | ---       | ---      |
| rs858696   | 11 | 129679205 | 0.1820 | 91.58% | 0.303500 | 0.485500 | 0.03222000 | 0.19180000 | NM_014155       | intron     | 0       | ---       | ZBTB44   |
| rs9321886  | 6  | 143382283 | 0.1306 | 94.04% | 0.181100 | 1.000000 | 0.03222000 | 0.06802000 | NM_016108       | upstream   | 41423   | Hs.567501 | AIG1     |
| rs1077572  | 13 | 108874772 | 0.0778 | 74.39% | 0.116500 | 1.000000 | 0.03223000 | 0.03621000 | NM_015011       | downstream | 216416  | Hs.656587 | MYO16    |
| rs10495131 | 1  | 217872810 | 0.0608 | 92.28% | 0.241700 | 0.267300 | 0.03225000 | 0.04657000 | NM_138794       | downstream | 419980  | Hs.657617 | LYPLAL1  |
| rs10501292 | 11 | 42952963  | 0.0848 | 78.60% | 0.661700 | 0.661100 | 0.03226000 | 0.05583000 | NM_006595       | upstream   | 337146  | Hs.435771 | API5     |
| rs6556635  | 5  | 162178999 | 0.4963 | 95.79% | 0.147500 | 0.544100 | 0.03226000 | 0.02268000 | NM_199246       | upstream   | 618156  | Hs.79101  | CCNG1    |
| rs689389   | 6  | 79348661  | 0.4564 | 96.49% | 0.543400 | 0.880800 | 0.03226000 | 0.13500000 | NM_001010844    | upstream   | 285247  | Hs.656212 | IRAK1BP1 |
| rs1021484  | 14 | 42934100  | 0.0647 | 97.54% | 1.000000 | 1.000000 | 0.03228000 | 0.11820000 | NM_152447       | downstream | 1490602 | Hs.136893 | LRFN5    |
| rs10507070 | 12 | 94873188  | 0.0647 | 97.54% | 0.614000 | 0.608900 | 0.03228000 | 0.03611000 | NM_152435       | intron     | 0       | Hs.424907 | AMDHD1   |
| rs7123748  | 11 | 99278455  | 0.0217 | 97.19% | 0.114600 | 1.000000 | 0.03229000 | 0.02744000 | NM_175566       | intron     | 0       | Hs.656783 | CNTN5    |
| rs10502509 | 18 | 24245194  | 0.3504 | 96.14% | 0.895200 | 0.599300 | 0.03230000 | 0.01151000 | NM_001792       | upstream   | 234005  | Hs.464829 | CDH2     |
| rs790951   | 1  | 106060503 | 0.4286 | 90.88% | 1.000000 | 0.871700 | 0.03231000 | 0.14100000 | ENST00000388703 | downstream | 1082666 | ---       | ---      |
| rs2981069  | 8  | 70100501  | 0.2461 | 89.82% | 0.614300 | 0.847300 | 0.03232000 | 0.15730000 | NM_052958       | downstream | 207157  | Hs.491941 | C8orf34  |
| rs1159328  | 2  | 221779581 | 0.0771 | 97.89% | 0.670200 | 0.463500 | 0.03234000 | 0.04574000 | NM_004438       | downstream | 211412  | Hs.371218 | EPHA4    |
| rs4442930  | 19 | 15912902  | 0.1913 | 97.19% | 0.248600 | 0.511700 | 0.03236000 | 0.11490000 | NM_021187       | upstream   | 6576    | Hs.187393 | CYP4F11  |
| rs4690560  | 4  | 178899904 | 0.4160 | 91.93% | 0.799700 | 1.000000 | 0.03236000 | 0.21200000 | ENST00000365495 | downstream | 160836  | ---       | ---      |
| rs3125353  | 6  | 58629563  | 0.4319 | 97.89% | 0.808100 | 0.549500 | 0.03237000 | 0.01363000 | NM_206911       | upstream   | 233908  | ---       | GUSBL2   |
| rs302957   | 8  | 106567598 | 0.4072 | 92.63% | 1.000000 | 0.283100 | 0.03239000 | 0.01623000 | NM_012082       | intron     | 0       | Hs.431009 | ZFPM2    |
| rs311326   | 6  | 153179314 | 0.2019 | 92.98% | 0.702200 | 1.000000 | 0.03239000 | 0.00691400 | NM_194435       | downstream | 56721   | Hs.53973  | VIP      |
| rs10518396 | 1  | 87945984  | 0.0779 | 96.84% | 1.000000 | 0.467500 | 0.03240000 | 0.01875000 | ENST00000362448 | upstream   | 254340  | ---       | ---      |
| rs4030582  | 3  | 144231408 | 0.2704 | 94.74% | 0.757400 | 0.300800 | 0.03240000 | 0.08501000 | ENST00000318822 | intron     | 0       | ---       | ---      |
| rs1957210  | 14 | 39382051  | 0.3435 | 97.54% | 0.110200 | 0.424100 | 0.03241000 | 0.04847000 | NM_203301       | upstream   | 410680  | Hs.324342 | FBXO33   |
| rs787111   | 10 | 29096634  | 0.2019 | 94.74% | 0.450600 | 0.521300 | 0.03241000 | 0.15070000 | ENST00000364131 | upstream   | 6896    | ---       | ---      |
| rs10519382 | 4  | 137315609 | 0.1685 | 96.84% | 0.666000 | 0.481700 | 0.03242000 | 0.03394000 | ENST00000384592 | upstream   | 178912  | ---       | ---      |
| rs887010   | 7  | 66762679  | 0.1549 | 74.74% | 0.299600 | 0.240600 | 0.03242000 | 0.03488000 | ENST00000388509 | upstream   | 260626  | ---       | ---      |
| rs249721   | 5  | 115050156 | 0.1500 | 94.74% | 0.089270 | 0.184400 | 0.03246000 | 0.15120000 | NM_021649       | upstream   | 60546   | Hs.705455 | TICAM2   |
| rs935661   | 2  | 45908861  | 0.4164 | 92.28% | 0.799600 | 0.877700 | 0.03247000 | 0.02628000 | NM_005400       | intron     | 0       | Hs.580351 | PRKCE    |

|            |    |           |        |        |          |          |            |            |                 |            |        |           |           |
|------------|----|-----------|--------|--------|----------|----------|------------|------------|-----------------|------------|--------|-----------|-----------|
| rs10517276 | 4  | 53624201  | 0.2063 | 94.39% | 0.576500 | 0.204700 | 0.03249000 | 0.00943400 | NM_152540       | intron     | 0      | Hs.302287 | SCFD2     |
| rs1878759  | 4  | 73733126  | 0.4033 | 85.26% | 0.690600 | 0.613100 | 0.03249000 | 0.04394000 | NM_014243       | upstream   | 79746  | Hs.590919 | ADAMTS3   |
| rs2201179  | 2  | 140669861 | 0.4046 | 91.93% | 0.020950 | 0.191200 | 0.03249000 | 0.02919000 | ENST00000385554 | upstream   | 21430  | ---       | ---       |
| rs1647598  | 5  | 154844311 | 0.3843 | 94.04% | 0.301200 | 0.756000 | 0.03251000 | 0.05165000 | ENST00000385835 | downstream | 75758  | ---       | ---       |
| rs4543079  | 4  | 47322588  | 0.2921 | 97.89% | 0.885500 | 0.396300 | 0.03251000 | 0.01374000 | NM_006587       | intron     | 0      | Hs.518618 | CORIN     |
| rs7214679  | 17 | 16383189  | 0.0289 | 97.19% | 0.199800 | 1.000000 | 0.03253000 | 0.10180000 | NM_020653       | downstream | 12247  | Hs.99724  | ZNF287    |
| rs7089102  | 10 | 57516173  | 0.4923 | 90.88% | 0.535600 | 0.358200 | 0.03257000 | 0.01928000 | NM_001005414    | downstream | 270822 | ---       | ZWINT     |
| rs10501181 | 11 | 37604748  | 0.0766 | 87.02% | 0.041890 | 0.160400 | 0.03259000 | 0.01800000 | NM_138787       | downstream | 967351 | Hs.406726 | C11orf74  |
| rs1587535  | 3  | 158462900 | 0.3922 | 94.39% | 0.798400 | 0.877600 | 0.03259000 | 0.04510000 | NM_024621       | intron     | 0      | Hs.658046 | VEPH1     |
| rs2570100  | 4  | 58766242  | 0.4544 | 96.14% | 0.544400 | 0.352500 | 0.03259000 | 0.22900000 | ENST00000387903 | upstream   | 712946 | ---       | ---       |
| rs10492822 | 16 | 71028485  | 0.1452 | 97.89% | 0.473700 | 1.000000 | 0.03262000 | 0.11210000 | ENST00000378742 | downstream | 59882  | ---       | ---       |
| rs10507236 | 12 | 110952822 | 0.1571 | 91.58% | 0.240700 | 1.000000 | 0.03262000 | 0.05572000 | NM_024953       | intron     | 0      | Hs.530941 | C12orf30  |
| rs10490956 | 10 | 11168479  | 0.1715 | 96.14% | 0.204500 | 0.342200 | 0.03263000 | 0.22260000 | NM_001025077    | upstream   | 78977  | Hs.309288 | CUGBP2    |
| rs10516940 | 4  | 94813222  | 0.3423 | 91.23% | 0.680200 | 0.372400 | 0.03263000 | 0.01419000 | NM_001510       | intron     | 0      | Hs.480281 | GRID2     |
| rs10491158 | 17 | 52099116  | 0.1693 | 88.07% | 0.376300 | 0.747100 | 0.03268000 | 0.09210000 | NM_005450       | downstream | 71574  | Hs.248201 | NOG       |
| rs1385986  | 4  | 72111975  | 0.0389 | 94.74% | 0.332600 | 1.000000 | 0.03268000 | 0.44790000 | NM_000788       | intron     | 0      | Hs.709    | DCK       |
| rs10514164 | 5  | 79000485  | 0.1766 | 94.39% | 0.010120 | 0.032210 | 0.03269000 | 0.04366000 | NM_173797       | CDS        | 0      | Hs.418198 | PAPD4     |
| rs7738188  | 6  | 162733654 | 0.4802 | 88.77% | 0.078100 | 0.057280 | 0.03269000 | 0.02109000 | NM_013988       | intron     | 0      | Hs.132954 | PARK2     |
| rs10506615 | 12 | 69590946  | 0.0215 | 97.89% | 1.000000 | 1.000000 | 0.03272000 | 0.03734000 | NM_002849       | intron     | 0      | Hs.506076 | PTPRR     |
| rs10513244 | 3  | 145877784 | 0.0215 | 97.89% | 1.000000 | 1.000000 | 0.03272000 | 0.10280000 | ENST00000355888 | downstream | 230408 | ---       | ---       |
| rs2200946  | 3  | 21698622  | 0.0595 | 94.39% | 0.055560 | 0.266100 | 0.03272000 | 0.03222000 | NM_024697       | intron     | 0      | Hs.21026  | ZNF385D   |
| rs2132528  | 8  | 50768208  | 0.1328 | 95.09% | 0.439500 | 1.000000 | 0.03273000 | 0.03344000 | NM_018967       | upstream   | 701118 | Hs.584914 | SNTG1     |
| rs7819004  | 8  | 50698414  | 0.1328 | 95.09% | 0.439500 | 1.000000 | 0.03273000 | 0.03344000 | NM_018967       | upstream   | 770912 | Hs.584914 | SNTG1     |
| rs1026909  | 4  | 65011960  | 0.0794 | 97.19% | 1.000000 | 0.381300 | 0.03275000 | 0.03962000 | NM_001010874    | upstream   | 54191  | Hs.227752 | SRD5A2L2  |
| rs10494469 | 1  | 165417387 | 0.1233 | 79.65% | 0.756500 | 1.000000 | 0.03276000 | 0.00414000 | NM_002697       | upstream   | 39372  | Hs.493649 | POU2F1    |
| rs10488509 | 7  | 91455027  | 0.2572 | 96.84% | 0.155100 | 0.270100 | 0.03277000 | 0.07162000 | NM_147166       | intron     | 0      | Hs.651221 | AKAP9     |
| rs9283944  | 8  | 107403285 | 0.2639 | 94.39% | 0.004538 | 0.003338 | 0.03277000 | 0.17710000 | NM_181354       | upstream   | 335985 | Hs.148778 | OXR1      |
| rs4902965  | 14 | 71529448  | 0.0985 | 92.63% | 0.088600 | 0.601600 | 0.03278000 | 0.07527000 | NM_004296       | intron     | 0      | Hs.509872 | RGS6      |
| rs10520496 | 4  | 182751386 | 0.4019 | 92.98% | 0.702300 | 0.877700 | 0.03279000 | 0.02032000 | ENST00000378957 | downstream | 70238  | ---       | ---       |
| rs10503275 | 8  | 4601576   | 0.0376 | 93.33% | 1.000000 | 1.000000 | 0.03280000 | 0.03664000 | ENST00000383934 | downstream | 371633 | ---       | ---       |
| rs10484944 | 6  | 80104580  | 0.0734 | 90.88% | 0.634000 | 0.632200 | 0.03283000 | 0.02074000 | NM_181714       | downstream | 146847 | Hs.21945  | LCA5      |
| rs4764768  | 12 | 99828039  | 0.2731 | 95.09% | 0.761900 | 0.723900 | 0.03284000 | 0.01150000 | NM_178826       | intron     | 0      | Hs.58785  | TMEM16D   |
| rs1387837  | 10 | 19043099  | 0.4301 | 97.89% | 0.114400 | 0.099540 | 0.03285000 | 0.04379000 | NM_178815       | downstream | 36153  | Hs.25362  | ARL5B     |
| rs1399899  | 3  | 162929198 | 0.4301 | 97.89% | 0.181700 | 0.001605 | 0.03285000 | 0.03431000 | ENST00000327928 | downstream | 224774 | ---       | ---       |
| rs4873328  | 8  | 50269412  | 0.4742 | 88.42% | 0.800400 | 0.337500 | 0.03285000 | 0.14000000 | NM_001007176    | downstream | 118698 | Hs.49890  | C8orf22   |
| rs6668120  | 1  | 177740186 | 0.3484 | 97.19% | 0.236700 | 0.749900 | 0.03286000 | 0.04039000 | NM_182766       | intron     | 0      | Hs.658505 | C1orf125  |
| rs872037   | 2  | 41494861  | 0.2333 | 94.74% | 0.866400 | 0.327900 | 0.03287000 | 0.00814400 | NM_021097       | upstream   | 960673 | Hs.468274 | SLC8A1    |
| rs10484586 | 6  | 143364121 | 0.0678 | 95.79% | 0.620200 | 0.616100 | 0.03288000 | 0.10390000 | NM_016108       | upstream   | 59595  | Hs.567501 | AIG1      |
| rs10518800 | 15 | 53251181  | 0.0678 | 95.79% | 1.000000 | 1.000000 | 0.03288000 | 0.03244000 | NM_016304       | downstream | 9632   | Hs.274772 | C15orf15  |
| rs10495650 | 2  | 16406714  | 0.1530 | 94.04% | 0.812600 | 0.297900 | 0.03289000 | 0.04279000 | ENST00000388035 | downstream | 162669 | ---       | ---       |
| rs7594267  | 2  | 23286410  | 0.3594 | 89.82% | 0.892000 | 0.871700 | 0.03289000 | 0.00561000 | ENST00000288548 | upstream   | 175665 | ---       | ---       |
| rs1450194  | 9  | 117771594 | 0.1537 | 76.49% | 0.186500 | 0.258700 | 0.03290000 | 0.08586000 | NM_021208       | upstream   | 44287  | ---       | C9orf27   |
| rs10502754 | 18 | 37054962  | 0.0720 | 92.63% | 1.000000 | 1.000000 | 0.03291000 | 0.06792000 | NM_002647       | upstream   | 734235 | Hs.464971 | PIK3C3    |
| rs1401608  | 8  | 139451116 | 0.2271 | 95.79% | 0.492700 | 0.336400 | 0.03291000 | 0.00467700 | NM_015912       | upstream   | 1687   | Hs.126024 | FAM135B   |
| rs1954669  | 14 | 27134852  | 0.0597 | 94.04% | 0.608800 | 1.000000 | 0.03291000 | 0.07213000 | NM_006491       | upstream   | 998052 | Hs.31588  | NOVA1     |
| rs10483102 | 22 | 17794222  | 0.0287 | 97.89% | 1.000000 | 1.000000 | 0.03292000 | 0.02144000 | NM_003325       | intron     | 0      | Hs.474206 | HIRA      |
| rs2291500  | 3  | 56633354  | 0.1567 | 94.04% | 0.109600 | 0.124800 | 0.03292000 | 0.03975000 | NM_015224       | intron     | 0      | Hs.116877 | C3orf63   |
| rs2736553  | 11 | 5341005   | 0.3173 | 95.09% | 0.888500 | 0.870000 | 0.03294000 | 0.01647000 | NM_005330       | intron     | 0      | Hs.655195 | HBE1      |
| rs10515853 | 5  | 162588458 | 0.0558 | 97.54% | 0.200700 | 0.233400 | 0.03295000 | 0.36090000 | NM_199246       | upstream   | 208697 | Hs.79101  | CCNG1     |
| rs1196184  | 2  | 182593441 | 0.0590 | 95.09% | 0.609100 | 1.000000 | 0.03295000 | 0.01735000 | ENST00000280295 | intron     | 0      | ---       | ---       |
| rs1571686  | 21 | 31018283  | 0.0590 | 95.09% | 0.230900 | 0.264800 | 0.03295000 | 0.01996000 | NM_181617       | downstream | 22857  | Hs.553699 | KRTAP21-2 |
| rs6133822  | 20 | 10107081  | 0.4691 | 96.49% | 0.467400 | 0.878100 | 0.03295000 | 0.16120000 | NM_130811       | upstream   | 40396  | Hs.167317 | SNAP25    |
| rs7791296  | 7  | 54188384  | 0.1537 | 94.74% | 0.238800 | 0.204700 | 0.03295000 | 0.06507000 | NM_001001707    | upstream   | 341274 | ---       | FLJ45974  |
| rs167602   | 11 | 5518171   | 0.0290 | 96.84% | 1.000000 | 1.000000 | 0.03299000 | 0.02035000 | NM_001005289    | downstream | 4196   | Hs.554540 | OR52H1    |

|            |    |           |        |        |          |          |            |            |                 |            |         |           |          |
|------------|----|-----------|--------|--------|----------|----------|------------|------------|-----------------|------------|---------|-----------|----------|
| rs2166363  | 5  | 3694988   | 0.4316 | 92.28% | 0.257800 | 0.541200 | 0.03299000 | 0.09265000 | NM_024337       | downstream | 40471   | Hs.424156 | IRX1     |
| rs7582749  | 2  | 37452841  | 0.3640 | 87.72% | 0.000202 | 0.019050 | 0.03300000 | 0.08072000 | NM_012413       | intron     | 0       | Hs.79033  | QPCT     |
| rs10517356 | 4  | 56213050  | 0.3810 | 94.39% | 0.606900 | 1.000000 | 0.03303000 | 0.10190000 | NM_006681       | upstream   | 15828   | Hs.418367 | NMU      |
| rs1759092  | 19 | 39368378  | 0.4603 | 97.19% | 0.185400 | 0.229900 | 0.03303000 | 0.09377000 | NM_015578       | intron     | 0       | Hs.407368 | LSM14A   |
| rs10518388 | 4  | 122499785 | 0.0833 | 94.74% | 0.097360 | 0.152400 | 0.03306000 | 0.08553000 | NM_198179       | intron     | 0       | Hs.368977 | GPR103   |
| rs16847672 | 4  | 73324748  | 0.2069 | 91.58% | 0.036260 | 0.178500 | 0.03307000 | 0.07259000 | NM_014243       | downstream | 40803   | Hs.590919 | ADAMTS3  |
| rs2743870  | 6  | 15732741  | 0.1093 | 97.89% | 0.755200 | 0.512600 | 0.03307000 | 0.08032000 | NM_183041       | intron     | 0       | Hs.571148 | DTNBP1   |
| rs959655   | 18 | 48132862  | 0.1093 | 97.89% | 0.008699 | 0.089390 | 0.03307000 | 0.01979000 | NM_005215       | intron     | 0       | Hs.579550 | DCC      |
| rs10482947 | 21 | 24659428  | 0.1254 | 97.89% | 0.783000 | 0.550100 | 0.03309000 | 0.05049000 | ENST00000355181 | upstream   | 123713  | ---       | ---      |
| rs16921658 | 8  | 56422954  | 0.0390 | 94.39% | 0.052620 | 1.000000 | 0.03309000 | 0.10580000 | NM_052898       | intron     | 0       | Hs.130197 | XKR4     |
| rs2513600  | 11 | 105805209 | 0.1406 | 89.82% | 0.000213 | 0.000815 | 0.03311000 | 0.03398000 | NM_000855       | downstream | 257911  | Hs.654555 | GUCY1A2  |
| rs10490353 | 2  | 45270098  | 0.1556 | 94.74% | 0.487200 | 0.502100 | 0.03312000 | 0.02349000 | ENST00000378479 | intron     | 0       | ---       | ---      |
| rs10079088 | 5  | 102648573 | 0.1260 | 86.32% | 0.000000 | 0.001505 | 0.03314000 | 0.05619000 | NM_033211       | downstream | 6313    | Hs.482976 | C5orf30  |
| rs2714610  | 7  | 66778682  | 0.1000 | 94.74% | 0.087720 | 0.080790 | 0.03314000 | 0.00470400 | ENST00000388509 | upstream   | 276629  | ---       | ---      |
| rs7870306  | 9  | 29308870  | 0.1379 | 91.58% | 0.600600 | 0.776300 | 0.03316000 | 0.07806000 | NM_152570       | upstream   | 648587  | Hs.699432 | LINGO2   |
| rs10485014 | 6  | 22779332  | 0.0728 | 91.58% | 1.000000 | 0.366000 | 0.03318000 | 0.02924000 | NM_138574       | downstream | 99458   | Hs.629246 | HDGFL1   |
| rs10503899 | 8  | 32066776  | 0.4151 | 92.98% | 0.447400 | 0.359700 | 0.03319000 | 0.02258000 | NM_013962       | intron     | 0       | Hs.453951 | NRG1     |
| rs8025054  | 15 | 84616500  | 0.3047 | 96.14% | 0.886800 | 1.000000 | 0.03320000 | 0.07871000 | NM_152336       | intron     | 0       | Hs.679833 | AGBL1    |
| rs9320422  | 6  | 113304686 | 0.1282 | 97.19% | 0.787400 | 1.000000 | 0.03321000 | 0.02039000 | ENST00000364516 | upstream   | 94702   | ---       | ---      |
| rs7099339  | 10 | 125040124 | 0.4373 | 92.28% | 0.259300 | 0.170400 | 0.03322000 | 0.11670000 | NM_153442       | upstream   | 375737  | Hs.12751  | GPR26    |
| rs7068381  | 10 | 107980672 | 0.4611 | 90.18% | 0.061150 | 0.019510 | 0.03323000 | 0.00540100 | NM_001013031    | downstream | 346297  | Hs.591915 | SORCS1   |
| rs846452   | 6  | 79348887  | 0.4516 | 97.89% | 0.629300 | 1.000000 | 0.03323000 | 0.11750000 | NM_001010844    | upstream   | 285021  | Hs.656212 | IRAK1BP1 |
| rs9301680  | 13 | 89949096  | 0.4783 | 88.77% | 0.314000 | 0.750200 | 0.03324000 | 0.05387000 | ENST00000385123 | downstream | 267564  | ---       | ---      |
| rs3172355  | 3  | 56631087  | 0.1803 | 94.39% | 0.406800 | 0.253300 | 0.03327000 | 0.02534000 | NM_001012506    | downstream | 211     | Hs.476399 | CCDC66   |
| rs2000349  | 14 | 97785329  | 0.2264 | 96.84% | 0.605500 | 1.000000 | 0.03328000 | 0.10060000 | ENST00000387922 | downstream | 102128  | ---       | ---      |
| rs9309989  | 3  | 85882197  | 0.1226 | 90.18% | 0.077960 | 0.672900 | 0.03330000 | 0.09983000 | NM_153184       | intron     | 0       | Hs.164578 | CADM2    |
| rs2565210  | 15 | 52085319  | 0.0560 | 97.19% | 0.201800 | 1.000000 | 0.03333000 | 0.08087000 | ENST00000380705 | upstream   | 89218   | ---       | ---      |
| rs4264258  | 13 | 100889192 | 0.2011 | 95.09% | 0.850600 | 0.789500 | 0.03333000 | 0.03516000 | NM_004791       | upstream   | 13665   | Hs.696554 | ITGBL1   |
| rs10502198 | 11 | 114240545 | 0.0531 | 85.96% | 1.000000 | 1.000000 | 0.03334000 | 0.03139000 | NM_182495       | downstream | 157050  | ---       | FAM55B   |
| rs2030879  | 12 | 73656959  | 0.0218 | 96.49% | 0.115400 | 1.000000 | 0.03335000 | 0.09930000 | NM_153748       | downstream | 63204   | Hs.591041 | KCNC2    |
| rs9297675  | 8  | 124872878 | 0.1882 | 89.47% | 0.220600 | 0.380600 | 0.03336000 | 0.03450000 | NM_144963       | intron     | 0       | Hs.459174 | FAM91A1  |
| rs4799     | 2  | 10850700  | 0.4801 | 70.53% | 0.572900 | 0.303200 | 0.03338000 | 0.01459000 | NM_005742       | CDS        | 0       | Hs.212102 | PDIA6    |
| rs591364   | 18 | 67338997  | 0.2230 | 97.54% | 0.389400 | 0.430700 | 0.03341000 | 0.01414000 | NM_182511       | downstream | 1015898 | Hs.569851 | CBLN2    |
| rs1018283  | 4  | 73291711  | 0.4496 | 97.54% | 0.544400 | 1.000000 | 0.03343000 | 0.01220000 | NM_053036       | downstream | 59069   | Hs.99231  | NPFFR2   |
| rs25810    | 5  | 129015788 | 0.3259 | 94.74% | 0.491900 | 0.148900 | 0.03343000 | 0.04169000 | NM_133638       | intron     | 0       | Hs.23751  | ADAMTS19 |
| rs10513443 | 3  | 154487130 | 0.0595 | 94.39% | 0.233500 | 1.000000 | 0.03344000 | 0.08780000 | ENST00000383956 | upstream   | 86634   | ---       | ---      |
| rs1350283  | 8  | 95291352  | 0.3588 | 89.47% | 0.000001 | 0.000067 | 0.03344000 | 0.02618000 | NM_004063       | upstream   | 1366    | Hs.591853 | CDH17    |
| rs687862   | 18 | 67338741  | 0.2204 | 97.89% | 0.294600 | 0.315600 | 0.03344000 | 0.01957000 | NM_182511       | downstream | 1016154 | Hs.569851 | CBLN2    |
| rs10508061 | 13 | 100757140 | 0.2490 | 91.58% | 0.245100 | 0.261000 | 0.03346000 | 0.08122000 | NM_052867       | intron     | 0       | Hs.525146 | NALCN    |
| rs1403839  | 7  | 145122893 | 0.1654 | 89.12% | 1.000000 | 0.616600 | 0.03346000 | 0.01326000 | ENST00000385572 | upstream   | 202461  | ---       | ---      |
| rs439222   | 5  | 125229474 | 0.4801 | 96.84% | 1.000000 | 0.294100 | 0.03346000 | 0.02192000 | NM_023927       | upstream   | 557526  | Hs.363558 | GRAMD3   |
| rs7856322  | 9  | 9821142   | 0.1362 | 94.04% | 0.296400 | 0.050670 | 0.03346000 | 0.06423000 | ENST00000363183 | downstream | 388790  | ---       | ---      |
| rs9301021  | 13 | 104774248 | 0.3556 | 97.19% | 0.191500 | 0.058000 | 0.03347000 | 0.05614000 | NM_172370       | upstream   | 142345  | Hs.381382 | DAOA     |
| rs945642   | 1  | 102236102 | 0.2601 | 87.02% | 0.004574 | 0.003907 | 0.03348000 | 0.01216000 | NM_058170       | upstream   | 928     | Hs.484475 | OLFM3    |
| rs1532379  | 7  | 97626429  | 0.1942 | 97.54% | 0.338500 | 0.190000 | 0.03350000 | 0.00582300 | NM_014916       | intron     | 0       | Hs.444179 | LMTK2    |
| rs2063182  | 12 | 73370892  | 0.1713 | 89.12% | 1.000000 | 0.756200 | 0.03350000 | 0.15610000 | ENST00000344556 | upstream   | 26710   | ---       | ---      |
| rs2172712  | 1  | 163354116 | 0.4173 | 93.33% | 0.899700 | 0.358700 | 0.03350000 | 0.18420000 | NM_001033507    | downstream | 83618   | Hs.667312 | LMX1A    |
| rs3800756  | 7  | 133753838 | 0.3513 | 97.89% | 0.793000 | 0.388200 | 0.03350000 | 0.06736000 | NM_001628       | downstream | 23811   | Hs.521212 | AKR1B1   |
| rs4944529  | 11 | 85006039  | 0.2398 | 94.39% | 0.132900 | 0.361200 | 0.03350000 | 0.22550000 | NM_018480       | upstream   | 11257   | Hs.525063 | TMEM126B |
| rs964572   | 3  | 145162615 | 0.1028 | 88.77% | 0.032880 | 0.019660 | 0.03350000 | 0.03767000 | NM_173552       | upstream   | 10988   | Hs.288954 | C3orf58  |
| rs10494509 | 1  | 176267683 | 0.1136 | 84.91% | 1.000000 | 1.000000 | 0.03353000 | 0.01751000 | ENST00000308284 | intron     | 0       | ---       | ---      |
| rs1395874  | 4  | 58641115  | 0.2817 | 94.04% | 0.548600 | 1.000000 | 0.03353000 | 0.07886000 | ENST00000387903 | upstream   | 587819  | ---       | ---      |
| rs1423260  | 5  | 39937278  | 0.2309 | 96.49% | 0.172400 | 0.247700 | 0.03353000 | 0.04562000 | NM_001343       | upstream   | 476575  | Hs.481980 | DAB2     |
| rs10491962 | 12 | 2313149   | 0.0396 | 92.98% | 1.000000 | 1.000000 | 0.03354000 | 0.13530000 | NM_000719       | intron     | 0       | Hs.118262 | CACNA1C  |

|            |    |           |        |        |          |          |            |            |                 |            |        |           |          |
|------------|----|-----------|--------|--------|----------|----------|------------|------------|-----------------|------------|--------|-----------|----------|
| rs17145129 | 5  | 118668070 | 0.0235 | 89.47% | 0.124000 | 1.000000 | 0.03355000 | 0.01995000 | NM_005509       | downstream | 55349  | Hs.181042 | DMXL1    |
| rs4834724  | 4  | 120080425 | 0.1148 | 94.74% | 1.000000 | 1.000000 | 0.03355000 | 0.04131000 | NM_133477       | intron     | 0      | Hs.655519 | SYNPO2   |
| rs1848284  | 15 | 47903387  | 0.3410 | 91.58% | 0.129600 | 0.150600 | 0.03356000 | 0.02421000 | NM_024837       | downstream | 34340  | Hs.511311 | ATP8B4   |
| rs5542     | 2  | 40195164  | 0.4657 | 97.19% | 0.054390 | 0.097690 | 0.03356000 | 0.13330000 | NM_021097       | 3UTR       | 0      | Hs.468274 | SLC8A1   |
| rs3011384  | 10 | 122583101 | 0.1685 | 97.89% | 1.000000 | 0.537600 | 0.03358000 | 0.04562000 | ENST00000369065 | intron     | 0      | ---       | ---      |
| rs764133   | 18 | 63441694  | 0.2950 | 97.54% | 1.000000 | 0.609700 | 0.03358000 | 0.05389000 | NM_032160       | upstream   | 106747 | Hs.124673 | DSEL     |
| rs1410054  | 10 | 112764145 | 0.1494 | 95.09% | 0.472400 | 0.790000 | 0.03361000 | 0.07490000 | NM_007373       | downstream | 730    | Hs.104315 | SHOC2    |
| rs10497118 | 2  | 153432089 | 0.1889 | 91.93% | 0.311500 | 0.163400 | 0.03365000 | 0.03145000 | NM_152522       | downstream | 106152 | Hs.516468 | ARL6IP6  |
| rs10511231 | 3  | 106125687 | 0.1935 | 97.89% | 0.084660 | 0.028070 | 0.03365000 | 0.17340000 | NM_001627       | upstream   | 442716 | Hs.591293 | ALCAM    |
| rs10490812 | 3  | 45152010  | 0.1240 | 89.12% | 0.777000 | 0.373800 | 0.03366000 | 0.01088000 | NM_178181       | intron     | 0      | Hs.476093 | CDCP1    |
| rs601057   | 7  | 42941352  | 0.1982 | 79.65% | 0.019440 | 0.141300 | 0.03366000 | 0.07510000 | NM_031903       | intron     | 0      | Hs.50252  | MRPL32   |
| rs1577302  | 10 | 19690726  | 0.0871 | 92.63% | 0.001283 | 0.000793 | 0.03368000 | 0.23710000 | ENST00000377265 | upstream   | 136696 | ---       | ---      |
| rs3787168  | 20 | 33696692  | 0.1580 | 94.39% | 1.000000 | 1.000000 | 0.03370000 | 0.03041000 | NM_152931       | intron     | 0      | Hs.246413 | CPNE1    |
| rs10489972 | 2  | 101887046 | 0.0535 | 85.26% | 0.506400 | 0.546400 | 0.03371000 | 0.02899000 | NM_145687       | downstream | 9463   | Hs.431550 | MAP4K4   |
| rs10514482 | 16 | 78709428  | 0.0701 | 95.09% | 1.000000 | 1.000000 | 0.03373000 | 0.04755000 | NM_130897       | upstream   | 422927 | Hs.98849  | DYNLRB2  |
| rs1527672  | 7  | 94401948  | 0.4578 | 78.95% | 0.346700 | 0.333200 | 0.03373000 | 0.13880000 | NM_017650       | intron     | 0      | Hs.21816  | PPPIR9A  |
| rs7828353  | 8  | 52779963  | 0.0701 | 95.09% | 1.000000 | 1.000000 | 0.03373000 | 0.03304000 | NM_052937       | upstream   | 112735 | Hs.308480 | PCMTD1   |
| rs1378647  | 7  | 136283723 | 0.4731 | 97.89% | 0.149400 | 0.761700 | 0.03377000 | 0.04633000 | NM_001006629    | intron     | 0      | Hs.535891 | CHRM2    |
| rs3211828  | 7  | 80117539  | 0.1038 | 92.98% | 0.175400 | 0.325000 | 0.03378000 | 0.00843700 | NM_000072       | intron     | 0      | Hs.120949 | CD36     |
| rs4728499  | 7  | 81610505  | 0.2563 | 97.89% | 0.083360 | 0.283100 | 0.03378000 | 0.27680000 | NM_000722       | intron     | 0      | Hs.282151 | CACNA2D1 |
| rs1380424  | 4  | 36489912  | 0.3352 | 93.68% | 1.000000 | 0.857900 | 0.03379000 | 0.00743700 | ENST00000357504 | downstream | 468101 | ---       | ---      |
| rs1494409  | 1  | 163354456 | 0.4139 | 93.68% | 0.900100 | 0.167500 | 0.03379000 | 0.18410000 | NM_001033507    | downstream | 85279  | Hs.667312 | LMX1A    |
| rs9306903  | 2  | 16977976  | 0.2256 | 97.19% | 0.305400 | 0.634100 | 0.03379000 | 0.05988000 | ENST00000386331 | downstream | 78220  | ---       | ---      |
| rs1032077  | 3  | 177508198 | 0.2116 | 93.68% | 0.198000 | 0.039420 | 0.03380000 | 0.03105000 | ENST00000366444 | downstream | 279800 | ---       | ---      |
| rs1029039  | 9  | 77843658  | 0.3686 | 82.81% | 1.000000 | 1.000000 | 0.03382000 | 0.03758000 | NM_006200       | intron     | 0      | Hs.368542 | PCSK5    |
| rs10506073 | 12 | 31499882  | 0.1175 | 94.04% | 0.551500 | 0.535400 | 0.03383000 | 0.01517000 | NM_144973       | intron     | 0      | Hs.118166 | MGC24039 |
| rs10484262 | 6  | 10089479  | 0.0849 | 95.09% | 1.000000 | 1.000000 | 0.03385000 | 0.02141000 | NM_153003       | intron     | 0      | Hs.532138 | OFCC1    |
| rs1947432  | 2  | 39080567  | 0.0852 | 94.74% | 0.704100 | 0.697700 | 0.03385000 | 0.00466300 | NM_005633       | intron     | 0      | Hs.654397 | SOS1     |
| rs2939213  | 11 | 28944086  | 0.0683 | 97.54% | 0.367100 | 0.362100 | 0.03385000 | 0.03954000 | NM_152636       | downstream | 632567 | Hs.243326 | METT5D1  |
| rs7945783  | 11 | 28793038  | 0.0683 | 97.54% | 0.367100 | 0.362100 | 0.03385000 | 0.03566000 | NM_152636       | downstream | 481519 | Hs.243326 | METT5D1  |
| rs1445698  | 5  | 85718380  | 0.2238 | 97.19% | 0.605700 | 0.814300 | 0.03387000 | 0.01139000 | NM_001867       | upstream   | 231097 | Hs.430075 | COX7C    |
| rs10507946 | 13 | 84451033  | 0.0450 | 97.54% | 1.000000 | 1.000000 | 0.03388000 | 0.05363000 | ENST00000377082 | upstream   | 145472 | ---       | ---      |
| rs1807159  | 19 | 22570023  | 0.1828 | 94.04% | 0.540800 | 0.578400 | 0.03388000 | 0.12340000 | ENST00000387067 | upstream   | 6124   | ---       | ---      |
| rs653166   | 1  | 192497072 | 0.0450 | 97.54% | 0.431400 | 0.465400 | 0.03388000 | 0.12840000 | ENST00000385495 | downstream | 226784 | ---       | ---      |
| rs10511577 | 9  | 13144803  | 0.2399 | 95.09% | 0.868400 | 0.823200 | 0.03389000 | 0.03993000 | NM_003829       | intron     | 0      | Hs.169378 | MPDZ     |
| rs1067637  | 12 | 62815387  | 0.4821 | 97.89% | 1.000000 | 0.654700 | 0.03389000 | 0.13650000 | NM_020762       | intron     | 0      | Hs.450763 | SRGAP1   |
| rs1564692  | 4  | 127403558 | 0.2399 | 95.09% | 0.738800 | 0.260300 | 0.03389000 | 0.15980000 | NM_024582       | downstream | 771185 | Hs.702217 | FAT4     |
| rs847328   | 14 | 71900759  | 0.1935 | 87.02% | 0.224900 | 0.374400 | 0.03391000 | 0.02196000 | NM_004296       | intron     | 0      | Hs.509872 | RGS6     |
| rs918961   | 2  | 60074049  | 0.2741 | 94.74% | 0.021340 | 0.049090 | 0.03391000 | 0.08181000 | ENST00000386566 | downstream | 298559 | ---       | ---      |
| rs306079   | 5  | 110683306 | 0.4785 | 97.89% | 1.000000 | 0.762900 | 0.03394000 | 0.02281000 | NM_001744       | intron     | 0      | Hs.591269 | CAMK4    |
| rs2189464  | 7  | 8600283   | 0.3296 | 94.74% | 0.129600 | 0.141700 | 0.03397000 | 0.05549000 | NM_152745       | upstream   | 156880 | Hs.487564 | NXP1     |
| rs10487882 | 7  | 9816524   | 0.1480 | 97.19% | 1.000000 | 0.313400 | 0.03398000 | 0.04200000 | ENST00000361014 | downstream | 82084  | ---       | ---      |
| rs1401879  | 12 | 88053742  | 0.0393 | 93.68% | 0.335700 | 1.000000 | 0.03401000 | 0.07268000 | ENST00000364267 | downstream | 146389 | ---       | ---      |
| rs10484737 | 6  | 124724705 | 0.2590 | 97.54% | 0.438400 | 0.274400 | 0.03402000 | 0.01370000 | NM_001040214    | intron     | 0      | Hs.656604 | NKAIN2   |
| rs10495648 | 2  | 15977810  | 0.3633 | 97.54% | 0.194200 | 0.273500 | 0.03405000 | 0.04525000 | ENST00000388030 | downstream | 16465  | ---       | ---      |
| rs10498431 | 14 | 51213444  | 0.4113 | 92.98% | 0.446800 | 0.415900 | 0.03405000 | 0.05358000 | NM_152330       | intron     | 0      | Hs.434914 | FRMD6    |
| rs4637381  | 4  | 154889706 | 0.3333 | 61.05% | 0.000001 | 0.000033 | 0.03405000 | 0.06419000 | NM_173662       | intron     | 0      | Hs.388364 | RNF175   |
| rs10499273 | 6  | 153591089 | 0.1953 | 97.89% | 0.850100 | 0.592500 | 0.03407000 | 0.04118000 | ENST00000312401 | downstream | 54026  | ---       | ---      |
| rs10501321 | 11 | 47251202  | 0.2395 | 91.58% | 0.017870 | 0.049470 | 0.03408000 | 0.04469000 | NM_130476       | intron     | 0      | Hs.82548  | MADD     |
| rs3759213  | 12 | 97797721  | 0.1984 | 88.42% | 0.000038 | 0.000249 | 0.03408000 | 0.03131000 | NM_020140       | intron     | 0      | Hs.506458 | ANKS1B   |
| rs1941619  | 18 | 20848396  | 0.3240 | 93.68% | 0.025940 | 0.019160 | 0.03409000 | 0.17670000 | NM_021624       | downstream | 536829 | Hs.287388 | HRH4     |
| rs2940341  | 7  | 112996798 | 0.1615 | 91.23% | 0.356100 | 0.184900 | 0.03410000 | 0.21090000 | NM_002711       | downstream | 304824 | Hs.458309 | PPPIR3A  |
| rs10491367 | 5  | 54239231  | 0.2085 | 95.09% | 0.267500 | 0.212000 | 0.03412000 | 0.01237000 | NM_007036       | downstream | 70218  | Hs.129944 | ESM1     |
| rs7736638  | 5  | 124570049 | 0.0474 | 96.14% | 0.463300 | 0.503100 | 0.03412000 | 0.07502000 | NM_020747       | upstream   | 461345 | Hs.266616 | ZNF608   |

|            |    |           |        |        |          |          |            |            |                 |            |         |           |           |
|------------|----|-----------|--------|--------|----------|----------|------------|------------|-----------------|------------|---------|-----------|-----------|
| rs7961701  | 12 | 79937739  | 0.1027 | 90.53% | 0.009340 | 0.022670 | 0.03412000 | 0.02235000 | NM_024560       | upstream   | 58201   | Hs.259559 | ACSS3     |
| rs195476   | 6  | 116279962 | 0.4856 | 97.54% | 0.402900 | 0.135900 | 0.03413000 | 0.01328000 | NM_002031       | downstream | 89424   | Hs.89426  | FRK       |
| rs3829918  | 10 | 3198140   | 0.3745 | 96.49% | 0.370100 | 0.440400 | 0.03413000 | 0.04814000 | NM_014889       | intron     | 0       | Hs.528300 | PITRM1    |
| rs10508208 | 10 | 900983    | 0.1906 | 92.98% | 0.323400 | 0.266300 | 0.03414000 | 0.12160000 | NM_015155       | intron     | 0       | Hs.705392 | LARP5     |
| rs2300881  | 2  | 37390926  | 0.3646 | 97.19% | 0.244000 | 0.735000 | 0.03414000 | 0.08396000 | NM_005813       | intron     | 0       | Hs.696257 | PRKD3     |
| rs697491   | 6  | 166361018 | 0.3705 | 88.07% | 1.000000 | 0.860400 | 0.03414000 | 0.14260000 | NM_001013720    | downstream | 37926   | ---       | LOC441177 |
| rs1929488  | 9  | 103205819 | 0.0830 | 95.09% | 0.702700 | 0.692700 | 0.03415000 | 0.08284000 | NM_197977       | intron     | 0       | Hs.50123  | ZNF189    |
| rs1929491  | 9  | 103206021 | 0.0830 | 95.09% | 0.702700 | 0.692700 | 0.03415000 | 0.08284000 | NM_197977       | intron     | 0       | Hs.50123  | ZNF189    |
| rs1322178  | 6  | 106738473 | 0.1162 | 95.09% | 0.550600 | 0.536700 | 0.03417000 | 0.12790000 | NM_004849       | downstream | 571     | Hs.486063 | ATG5      |
| rs10512754 | 5  | 41039556  | 0.3736 | 95.79% | 0.198700 | 0.531900 | 0.03418000 | 0.10570000 | NM_173489       | intron     | 0       | Hs.97714  | FLJ40243  |
| rs2413338  | 22 | 33993523  | 0.4157 | 93.68% | 1.000000 | 0.761500 | 0.03419000 | 0.09407000 | NM_001003681    | intron     | 0       | Hs.588815 | HMG2L1    |
| rs423463   | 6  | 89955427  | 0.2654 | 74.04% | 0.289000 | 0.817200 | 0.03419000 | 0.08986000 | NM_002042       | intron     | 0       | Hs.437745 | GABRR1    |
| rs10488914 | 4  | 112031737 | 0.0824 | 95.79% | 0.406700 | 1.000000 | 0.03421000 | 0.04360000 | NM_000325       | upstream   | 268034  | Hs.643588 | PITX2     |
| rs224924   | 5  | 81756475  | 0.4415 | 92.98% | 0.318500 | 0.638600 | 0.03421000 | 0.19980000 | NM_001039779    | downstream | 38384   | ---       | FLJ41309  |
| rs2366979  | 5  | 38414969  | 0.0467 | 78.95% | 0.072780 | 1.000000 | 0.03421000 | 0.07774000 | NM_182799       | intron     | 0       | Hs.20103  | EGFLAM    |
| rs10484706 | 6  | 56155275  | 0.0448 | 97.89% | 1.000000 | 1.000000 | 0.03422000 | 0.04235000 | NM_030820       | intron     | 0       | Hs.47629  | COL21A1   |
| rs10497731 | 2  | 193021180 | 0.0815 | 96.84% | 1.000000 | 0.501000 | 0.03422000 | 0.02734000 | NM_016192       | upstream   | 253293  | Hs.144513 | TMEFF2    |
| rs885631   | 6  | 56209793  | 0.0448 | 97.89% | 1.000000 | 1.000000 | 0.03422000 | 0.04235000 | NM_030820       | intron     | 0       | Hs.47629  | COL21A1   |
| rs10488554 | 7  | 93020251  | 0.2452 | 91.58% | 0.179200 | 0.061120 | 0.03424000 | 0.10940000 | NM_001742       | intron     | 0       | Hs.489127 | CALCR     |
| rs10518716 | 15 | 65281877  | 0.3040 | 97.54% | 0.888300 | 0.614400 | 0.03424000 | 0.02981000 | NM_024666       | 3UTR       | 0       | Hs.254642 | FLJ11506  |
| rs10504433 | 8  | 70021434  | 0.1347 | 95.09% | 0.037980 | 0.154100 | 0.03428000 | 0.11200000 | NM_052958       | downstream | 128090  | Hs.491941 | C8orf34   |
| rs7739686  | 6  | 23669660  | 0.2132 | 92.98% | 0.715200 | 0.129100 | 0.03428000 | 0.08295000 | ENST00000330282 | upstream   | 293201  | ---       | ---       |
| rs914840   | 13 | 65255649  | 0.2299 | 96.14% | 0.305500 | 0.813800 | 0.03428000 | 0.02089000 | ENST00000321014 | downstream | 4416    | ---       | ---       |
| rs6688573  | 1  | 106110661 | 0.2572 | 97.54% | 1.000000 | 1.000000 | 0.03432000 | 0.08644000 | ENST00000388703 | downstream | 1037068 | ---       | ---       |
| rs1469063  | 5  | 164791994 | 0.2768 | 95.09% | 0.000808 | 0.004419 | 0.03434000 | 0.24790000 | ENST00000385732 | upstream   | 177030  | ---       | ---       |
| rs10490478 | 2  | 207636308 | 0.0688 | 96.84% | 0.370700 | 1.000000 | 0.03441000 | 0.02441000 | NM_003709       | downstream | 17015   | Hs.471221 | KLF7      |
| rs10512393 | 9  | 111192977 | 0.4330 | 91.58% | 0.023320 | 0.120400 | 0.03441000 | 0.15850000 | NM_002829       | intron     | 0       | Hs.436429 | PTPN3     |
| rs4753569  | 11 | 93653841  | 0.3755 | 95.79% | 0.605700 | 0.756200 | 0.03443000 | 0.04328000 | NM_015368       | downstream | 99060   | Hs.591976 | PANX1     |
| rs565685   | 6  | 129021415 | 0.2711 | 78.95% | 0.735800 | 0.173500 | 0.03444000 | 0.13510000 | ENST00000385937 | upstream   | 40062   | ---       | ---       |
| rs1589764  | 7  | 10362495  | 0.3032 | 89.12% | 0.181000 | 0.426600 | 0.03445000 | 0.09933000 | ENST00000387411 | downstream | 133332  | ---       | ---       |
| rs10492296 | 12 | 85656971  | 0.0451 | 97.19% | 0.432600 | 0.465400 | 0.03448000 | 0.05298000 | NM_013244       | upstream   | 689325  | Hs.662231 | MGAT4C    |
| rs3136409  | 8  | 95516438  | 0.1370 | 94.74% | 0.797000 | 0.702800 | 0.03448000 | 0.05812000 | NM_012415       | intron     | 0       | Hs.30561  | RAD54B    |
| rs331622   | 13 | 109088827 | 0.0451 | 97.19% | 0.432600 | 0.465400 | 0.03448000 | 0.02681000 | NM_003749       | downstream | 115358  | Hs.442344 | IRS2      |
| rs1333667  | 6  | 10296494  | 0.0293 | 95.79% | 1.000000 | 1.000000 | 0.03449000 | 0.04032000 | NM_153003       | upstream   | 127586  | Hs.532138 | OFCC1     |
| rs229460   | 21 | 20973470  | 0.2435 | 94.39% | 0.408300 | 0.849100 | 0.03449000 | 0.11010000 | NM_004540       | upstream   | 601297  | Hs.473450 | NCAM2     |
| rs2417970  | 12 | 21304001  | 0.2030 | 95.09% | 0.850800 | 0.830200 | 0.03449000 | 0.03678000 | NM_005075       | downstream | 15489   | Hs.46440  | SLCO1A2   |
| rs285402   | 8  | 87110843  | 0.2225 | 79.65% | 0.000392 | 0.016080 | 0.03449000 | 0.14170000 | NM_033126       | downstream | 18964   | Hs.680136 | PSKH2     |
| rs9317039  | 13 | 58484740  | 0.2299 | 96.14% | 1.000000 | 1.000000 | 0.03449000 | 0.03592000 | ENST00000364727 | upstream   | 467464  | ---       | ---       |
| rs2343116  | 4  | 158032128 | 0.1357 | 94.39% | 0.797000 | 0.576400 | 0.03450000 | 0.01208000 | NM_016205       | intron     | 0       | Hs.570855 | PDGFC     |
| rs10488769 | 11 | 110026148 | 0.2500 | 92.63% | 0.870000 | 1.000000 | 0.03453000 | 0.04555000 | NM_020809       | intron     | 0       | Hs.6136   | ARHGAP20  |
| rs275358   | 3  | 81551603  | 0.3664 | 91.93% | 0.597100 | 0.734300 | 0.03453000 | 0.07914000 | NM_000158       | downstream | 69939   | Hs.436062 | GBE1      |
| rs857107   | 1  | 56995187  | 0.2273 | 96.49% | 0.734100 | 0.843700 | 0.03457000 | 0.28560000 | NM_001004303    | intron     | 0       | Hs.437655 | C1orf168  |
| rs2579884  | 8  | 35460189  | 0.1470 | 97.89% | 0.339200 | 1.000000 | 0.03458000 | 0.05507000 | ENST00000380061 | intron     | 0       | ---       | ---       |
| rs4237426  | 10 | 12790628  | 0.4771 | 91.93% | 0.013030 | 0.125500 | 0.03458000 | 0.01706000 | NM_153498       | intron     | 0       | Hs.659517 | CAMK1D    |
| rs7732805  | 5  | 28814401  | 0.1470 | 97.89% | 0.339200 | 1.000000 | 0.03458000 | 0.11290000 | ENST00000333399 | upstream   | 147063  | ---       | ---       |
| rs9309182  | 2  | 50530852  | 0.2887 | 83.86% | 0.027580 | 0.527500 | 0.03458000 | 0.01597000 | NM_138735       | upstream   | 102482  | Hs.637685 | NRXN1     |
| rs9285493  | 6  | 141022454 | 0.4431 | 86.32% | 0.518400 | 0.336100 | 0.03459000 | 0.04062000 | NM_006079       | upstream   | 1284976 | Hs.82071  | CITED2    |
| rs2289561  | 11 | 20076082  | 0.1240 | 91.93% | 1.000000 | 0.766900 | 0.03461000 | 0.02798000 | NM_145117       | intron     | 0       | ---       | NAV2      |
| rs7003388  | 8  | 89459527  | 0.1487 | 97.89% | 0.092770 | 0.188400 | 0.03463000 | 0.02832000 | NM_022564       | upstream   | 50635   | Hs.546267 | MMP16     |
| rs337331   | 7  | 125733626 | 0.3651 | 97.54% | 0.897000 | 0.498300 | 0.03464000 | 0.02713000 | NM_000845       | downstream | 132783  | Hs.449625 | GRM8      |
| rs10517390 | 4  | 36490528  | 0.3321 | 95.09% | 1.000000 | 0.858400 | 0.03469000 | 0.00953000 | ENST00000357504 | downstream | 468717  | ---       | ---       |
| rs10511071 | 3  | 85882767  | 0.1375 | 94.39% | 1.000000 | 0.703200 | 0.03470000 | 0.08975000 | NM_153184       | intron     | 0       | Hs.164578 | CADM2     |
| rs2372665  | 3  | 81129513  | 0.2301 | 96.84% | 0.172100 | 0.017660 | 0.03471000 | 0.03486000 | NM_000158       | downstream | 492029  | Hs.436062 | GBE1      |
| rs4885322  | 13 | 75069332  | 0.3040 | 97.54% | 0.255900 | 1.000000 | 0.03471000 | 0.11040000 | NM_006002       | intron     | 0       | Hs.162241 | UCHL3     |

|            |    |           |        |        |          |          |            |            |                 |            |         |           |          |
|------------|----|-----------|--------|--------|----------|----------|------------|------------|-----------------|------------|---------|-----------|----------|
| rs561454   | 4  | 74985590  | 0.4151 | 95.09% | 0.901000 | 1.000000 | 0.03473000 | 0.05389000 | NM_001511       | downstream | 17341   | Hs.789    | CXCL1    |
| rs10519822 | 5  | 124925188 | 0.0498 | 91.58% | 0.480500 | 0.516100 | 0.03474000 | 0.14390000 | NM_023927       | upstream   | 861812  | Hs.363558 | GRAMD3   |
| rs2132966  | 11 | 20367216  | 0.2490 | 92.28% | 0.620400 | 1.000000 | 0.03474000 | 0.02366000 | NM_005788       | intron     | 0       | Hs.152337 | PRMT3    |
| rs7527085  | 1  | 98025993  | 0.1475 | 97.54% | 0.089470 | 0.060190 | 0.03474000 | 0.03828000 | NM_000110       | intron     | 0       | Hs.335034 | DPYD     |
| rs1921650  | 2  | 224062927 | 0.1991 | 79.30% | 0.037930 | 0.036260 | 0.03479000 | 0.01905000 | NM_003469       | downstream | 106979  | Hs.516726 | SCG2     |
| rs1329710  | 6  | 45077103  | 0.4549 | 93.33% | 0.324700 | 0.225900 | 0.03480000 | 0.01720000 | NM_181356       | intron     | 0       | Hs.368325 | SUPT3H   |
| rs10493152 | 1  | 50901365  | 0.1027 | 90.53% | 0.738200 | 1.000000 | 0.03483000 | 0.12760000 | NM_007051       | intron     | 0       | Hs.530402 | FAF1     |
| rs293966   | 11 | 26536069  | 0.0572 | 95.09% | 0.208900 | 0.240700 | 0.03483000 | 0.13050000 | NM_031418       | intron     | 0       | Hs.91791  | TMEM16C  |
| rs3929856  | 13 | 18867056  | 0.2500 | 89.82% | 0.617300 | 1.000000 | 0.03483000 | 0.03414000 | NM_199254       | downstream | 28146   | Hs.377488 | TPTE2    |
| rs7817589  | 8  | 82316787  | 0.1347 | 85.96% | 0.022880 | 0.108700 | 0.03483000 | 0.02772000 | NM_001444       | upstream   | 38539   | Hs.408061 | FABP5    |
| rs797054   | 3  | 30776179  | 0.4238 | 94.39% | 0.319000 | 0.289100 | 0.03483000 | 0.01726000 | NM_207359       | intron     | 0       | Hs.657052 | GADL1    |
| rs10487625 | 7  | 143768517 | 0.4363 | 93.68% | 0.384700 | 0.116100 | 0.03484000 | 0.01556000 | ENST00000385576 | upstream   | 11201   | ---       | ---      |
| rs10501896 | 11 | 98406293  | 0.1727 | 97.54% | 0.056880 | 0.063070 | 0.03484000 | 0.01475000 | ENST00000388171 | upstream   | 89835   | ---       | ---      |
| rs9291745  | 5  | 61327157  | 0.3435 | 91.93% | 0.013690 | 0.019100 | 0.03484000 | 0.01260000 | NM_004520       | upstream   | 310678  | Hs.558351 | KIF2A    |
| rs574545   | 6  | 94894667  | 0.4401 | 84.91% | 0.036830 | 0.020930 | 0.03485000 | 0.10610000 | ENST00000364082 | downstream | 249001  | ---       | ---      |
| rs10489265 | 1  | 171502688 | 0.2753 | 93.68% | 0.542800 | 0.531800 | 0.03486000 | 0.00797100 | NM_003326       | upstream   | 59594   | Hs.181097 | TNFSF4   |
| rs413206   | 5  | 35405210  | 0.1448 | 88.42% | 0.316200 | 0.574600 | 0.03486000 | 0.01622000 | NM_000949       | upstream   | 138876  | Hs.368587 | PRLR     |
| rs10514646 | 2  | 84922143  | 0.1808 | 95.09% | 0.014070 | 0.010560 | 0.03487000 | 0.08723000 | ENST00000335459 | intron     | 0       | ---       | ---      |
| rs10511622 | 9  | 16586071  | 0.1111 | 97.89% | 0.221300 | 0.367000 | 0.03488000 | 0.00933500 | NM_017637       | intron     | 0       | Hs.656581 | BNC2     |
| rs1513215  | 3  | 39561067  | 0.0215 | 81.75% | 1.000000 | 1.000000 | 0.03489000 | 0.99780000 | NM_182935       | downstream | 28571   | Hs.121333 | MOBP     |
| rs1566358  | 1  | 211729368 | 0.4086 | 94.04% | 0.899900 | 1.000000 | 0.03489000 | 0.05084000 | ENST00000331583 | upstream   | 60326   | ---       | ---      |
| rs3002309  | 1  | 212611255 | 0.2879 | 92.63% | 0.548300 | 0.233000 | 0.03490000 | 0.01389000 | NM_005401       | intron     | 0       | Hs.696573 | PTPN14   |
| rs9315112  | 13 | 30594502  | 0.2264 | 89.12% | 0.074670 | 0.084130 | 0.03491000 | 0.11100000 | NM_006644       | downstream | 14263   | Hs.36927  | HSPH1    |
| rs10492213 | 12 | 105819971 | 0.1386 | 93.68% | 0.797100 | 0.260300 | 0.03493000 | 0.10220000 | NM_018157       | downstream | 14781   | Hs.131306 | RIC8B    |
| rs2048988  | 2  | 170860831 | 0.2312 | 88.77% | 0.012260 | 0.331800 | 0.03494000 | 0.06773000 | NM_138995       | intron     | 0       | Hs.671900 | MYO3B    |
| rs10500912 | 11 | 21569166  | 0.0597 | 94.04% | 1.000000 | 0.270200 | 0.03495000 | 0.04478000 | NM_006157       | downstream | 15363   | Hs.657172 | NELL1    |
| rs10517551 | 4  | 40538045  | 0.0967 | 96.14% | 0.152100 | 0.709800 | 0.03496000 | 0.06093000 | NM_173075       | intron     | 0       | Hs.479602 | APBB2    |
| rs709274   | 2  | 239996908 | 0.2248 | 97.54% | 0.493000 | 0.551500 | 0.03496000 | 0.19940000 | NM_006037       | upstream   | 9328    | Hs.20516  | HDAC4    |
| rs737939   | 22 | 28645416  | 0.4380 | 93.33% | 0.619800 | 0.760700 | 0.03497000 | 0.04137000 | NM_021090       | intron     | 0       | Hs.474536 | MTMR3    |
| rs10483865 | 14 | 74901236  | 0.2309 | 96.49% | 1.000000 | 0.644200 | 0.03499000 | 0.02676000 | NM_130469       | upstream   | 63577   | Hs.699420 | JDP2     |
| rs10515610 | 5  | 147733282 | 0.2663 | 96.84% | 0.645700 | 0.858200 | 0.03499000 | 0.01794000 | NM_205836       | upstream   | 10457   | Hs.483772 | FBXO38   |
| rs10520842 | 5  | 16679717  | 0.0730 | 93.68% | 1.000000 | 1.000000 | 0.03500000 | 0.07838000 | NM_012334       | downstream | 38696   | Hs.481720 | MYO10    |
| rs1916503  | 10 | 57119488  | 0.3620 | 97.89% | 0.603900 | 0.735500 | 0.03502000 | 0.04839000 | NM_001005414    | downstream | 667717  | ---       | ---      |
| rs6735587  | 2  | 125754892 | 0.3094 | 97.54% | 0.778800 | 0.505500 | 0.03502000 | 0.08674000 | NM_016815       | upstream   | 1409652 | Hs.59138  | GYPC     |
| rs10494545 | 1  | 180467282 | 0.2481 | 94.04% | 0.189200 | 0.378900 | 0.03504000 | 0.02875000 | NM_001009992    | upstream   | 169812  | Hs.684328 | ZNF648   |
| rs11066232 | 12 | 111203549 | 0.1715 | 97.19% | 0.674600 | 1.000000 | 0.03505000 | 0.03541000 | NM_173813       | upstream   | 7609    | ---       | C12orf51 |
| rs17066851 | 8  | 3504744   | 0.0321 | 92.98% | 1.000000 | 1.000000 | 0.03505000 | 0.01228000 | NM_033225       | upstream   | 250208  | Hs.571466 | CSMD1    |
| rs10490954 | 10 | 11178054  | 0.3585 | 92.98% | 0.183700 | 0.169700 | 0.03507000 | 0.07373000 | NM_001025077    | upstream   | 69402   | Hs.309288 | CUGBP2   |
| rs10498638 | 14 | 93004188  | 0.2111 | 94.74% | 0.360000 | 0.803300 | 0.03508000 | 0.03354000 | NM_020818       | intron     | 0       | Hs.126561 | KIAA1409 |
| rs957438   | 11 | 84279025  | 0.3065 | 97.89% | 0.887900 | 0.867800 | 0.03508000 | 0.09833000 | ENST00000376104 | intron     | 0       | ---       | ---      |
| rs864391   | 3  | 45422021  | 0.4007 | 95.44% | 0.448400 | 0.442900 | 0.03511000 | 0.28460000 | NM_015340       | intron     | 0       | Hs.526975 | LARS2    |
| rs4632028  | 13 | 52504516  | 0.1764 | 96.49% | 0.534500 | 1.000000 | 0.03512000 | 0.10280000 | NM_006418       | intron     | 0       | Hs.559736 | OLFM4    |
| rs278411   | 3  | 74330763  | 0.2529 | 92.28% | 1.000000 | 0.268900 | 0.03514000 | 0.06292000 | NM_020872       | downstream | 63649   | Hs.12723  | CNTN3    |
| rs2043556  | 10 | 52729412  | 0.4419 | 93.68% | 0.171800 | 0.041380 | 0.03516000 | 0.13470000 | NM_006258       | intron     | 0       | Hs.654556 | PRKG1    |
| rs3823572  | 7  | 133331141 | 0.3175 | 96.14% | 0.332600 | 0.409300 | 0.03520000 | 0.09319000 | NM_001037126    | intron     | 0       | Hs.321273 | EXOC4    |
| rs678134   | 2  | 220288792 | 0.4167 | 94.74% | 0.531900 | 0.650900 | 0.03522000 | 0.02463000 | ENST00000355668 | upstream   | 14840   | ---       | ---      |
| rs409620   | 2  | 40231848  | 0.3705 | 97.54% | 0.028370 | 0.064080 | 0.03524000 | 0.28430000 | NM_021097       | intron     | 0       | Hs.468274 | SLC8A1   |
| rs967895   | 2  | 111517873 | 0.3705 | 97.54% | 0.519900 | 0.866700 | 0.03524000 | 0.00736900 | NM_018308       | intron     | 0       | ---       | ACOXL    |
| rs1979546  | 3  | 151327247 | 0.2124 | 93.33% | 0.464400 | 0.405100 | 0.03525000 | 0.01969000 | ENST00000386021 | upstream   | 48939   | ---       | ---      |
| rs1839800  | 11 | 4397360   | 0.2381 | 95.79% | 0.316500 | 0.113000 | 0.03530000 | 0.05074000 | NM_003141       | upstream   | 25858   | Hs.532357 | TRIM21   |
| rs10510820 | 3  | 59929425  | 0.1434 | 90.53% | 0.199600 | 0.090750 | 0.03531000 | 0.03306000 | NM_002012       | intron     | 0       | Hs.655995 | FHIT     |
| rs2246981  | 2  | 29792132  | 0.2103 | 88.42% | 1.000000 | 0.605200 | 0.03534000 | 0.07020000 | NM_004304       | intron     | 0       | Hs.654469 | ALK      |
| rs10515619 | 5  | 148155297 | 0.0979 | 66.32% | 0.019760 | 0.024360 | 0.03535000 | 0.07829000 | NM_000024       | upstream   | 29704   | Hs.591251 | ADRB2    |
| rs181586   | 10 | 119258198 | 0.3821 | 80.35% | 0.124300 | 0.308600 | 0.03539000 | 0.08053000 | NM_004098       | upstream   | 33748   | Hs.202095 | EMX2     |

|            |    |           |        |        |          |          |            |            |                 |            |        |           |           |
|------------|----|-----------|--------|--------|----------|----------|------------|------------|-----------------|------------|--------|-----------|-----------|
| rs10521042 | 16 | 6339838   | 0.0953 | 97.54% | 1.000000 | 0.476000 | 0.03540000 | 0.03790000 | NM_001013705    | upstream   | 27927  | ---       | LOC440337 |
| rs9315113  | 13 | 30619220  | 0.3321 | 94.04% | 0.681000 | 0.856100 | 0.03545000 | 0.03577000 | NM_006644       | intron     | 0      | Hs.36927  | HSPH1     |
| rs715285   | 5  | 131513282 | 0.3774 | 91.58% | 0.895100 | 1.000000 | 0.03547000 | 0.03554000 | NM_001017973    | downstream | 42920  | Hs.519568 | P4HA2     |
| rs1981360  | 18 | 29496909  | 0.3966 | 93.33% | 0.020980 | 0.116900 | 0.03549000 | 0.44000000 | NM_198995       | upstream   | 222226 | Hs.115461 | C18orf34  |
| rs10489015 | 4  | 26982600  | 0.0989 | 95.79% | 0.159200 | 0.717600 | 0.03551000 | 0.03256000 | ENST00000363691 | upstream   | 148453 | ---       | ---       |
| rs10495064 | 1  | 215896812 | 0.1320 | 87.72% | 0.780500 | 0.696400 | 0.03553000 | 0.04572000 | NM_138796       | intron     | 0      | Hs.171130 | SPATA17   |
| rs210236   | 10 | 42332699  | 0.1751 | 97.19% | 0.532500 | 0.551300 | 0.03554000 | 0.18000000 | ENST00000374537 | downstream | 2386   | ---       | ---       |
| rs2038479  | 1  | 170205913 | 0.1899 | 83.16% | 0.032000 | 0.099720 | 0.03555000 | 0.22200000 | NM_015569       | intron     | 0      | Hs.654775 | DNM3      |
| rs980222   | 13 | 100888302 | 0.2011 | 96.84% | 0.851100 | 0.606400 | 0.03557000 | 0.04444000 | NM_004791       | upstream   | 14555  | Hs.696554 | ITGBL1    |
| rs10501590 | 11 | 84620725  | 0.2719 | 96.14% | 0.092270 | 0.535800 | 0.03558000 | 0.10940000 | ENST00000376104 | intron     | 0      | ---       | ---       |
| rs2383713  | 9  | 26763231  | 0.0529 | 89.47% | 0.516300 | 0.554100 | 0.03558000 | 0.10990000 | NM_024828       | downstream | 67452  | Hs.178357 | C9orf82   |
| rs693819   | 1  | 28265882  | 0.0223 | 78.60% | 1.000000 | 1.000000 | 0.03561000 | 0.01899000 | NM_001990       | intron     | 0      | Hs.185774 | EYA3      |
| rs561637   | 11 | 89992350  | 0.3968 | 88.42% | 0.359900 | 0.340100 | 0.03564000 | 0.03603000 | NM_012124       | upstream   | 396523 | Hs.22857  | CHORDC1   |
| rs722341   | 11 | 17429722  | 0.1015 | 93.33% | 0.740100 | 0.720700 | 0.03566000 | 0.02775000 | NM_000352       | intron     | 0      | Hs.54470  | ABCC8     |
| rs2315894  | 13 | 54866889  | 0.2940 | 93.68% | 0.769400 | 0.845200 | 0.03567000 | 0.03659000 | ENST00000258651 | upstream   | 953438 | ---       | ---       |
| rs3897767  | 5  | 144661751 | 0.1462 | 91.23% | 0.130000 | 0.474600 | 0.03567000 | 0.09318000 | NM_138492       | downstream | 457024 | Hs.314261 | PRELID2   |
| rs2867698  | 4  | 81220964  | 0.0887 | 92.98% | 1.000000 | 1.000000 | 0.03568000 | 0.06084000 | NM_058172       | upstream   | 8223   | Hs.162963 | ANTXR2    |
| rs1456017  | 2  | 46761131  | 0.2460 | 66.32% | 0.078080 | 0.115800 | 0.03569000 | 0.02246000 | NM_144949       | upstream   | 18464  | Hs.468426 | SOCS5     |
| rs10517686 | 4  | 159262079 | 0.0407 | 90.53% | 0.056800 | 0.104100 | 0.03570000 | 0.06783000 | NM_016613       | downstream | 5930   | Hs.567498 | C4orf18   |
| rs9318757  | 13 | 80711441  | 0.3547 | 90.53% | 0.221900 | 0.509700 | 0.03571000 | 0.01635000 | ENST00000387380 | upstream   | 26442  | ---       | ---       |
| rs995653   | 9  | 106840914 | 0.3235 | 89.47% | 0.021540 | 0.064090 | 0.03571000 | 0.11880000 | NM_005502       | upstream   | 110575 | Hs.429294 | ABCA1     |
| rs1834476  | 7  | 49802856  | 0.0650 | 86.32% | 1.000000 | 1.000000 | 0.03572000 | 0.03025000 | NM_198570       | intron     | 0      | Hs.677488 | VWC2      |
| rs10513311 | 9  | 119648541 | 0.3850 | 96.14% | 0.375000 | 0.098310 | 0.03574000 | 0.02000000 | NM_138554       | downstream | 129571 | Hs.174312 | TLR4      |
| rs141014   | 1  | 55071727  | 0.1996 | 97.54% | 0.708600 | 0.400000 | 0.03576000 | 0.09015000 | NM_152607       | intron     | 0      | ---       | C1orf177  |
| rs188541   | 5  | 37097018  | 0.3725 | 89.47% | 1.000000 | 0.384900 | 0.03576000 | 0.00564500 | NM_015384       | intron     | 0      | Hs.481927 | NIPBL     |
| rs3777425  | 6  | 116385510 | 0.3395 | 95.09% | 1.000000 | 0.198300 | 0.03576000 | 0.09653000 | NM_002031       | intron     | 0      | Hs.89426  | FRK       |
| rs6847164  | 4  | 120754182 | 0.0950 | 97.89% | 0.025320 | 0.014800 | 0.03576000 | 0.06738000 | NM_033437       | intron     | 0      | Hs.647971 | PDE5A     |
| rs10512626 | 3  | 125802903 | 0.1827 | 95.09% | 1.000000 | 0.647700 | 0.03578000 | 0.06627000 | NM_007064       | intron     | 0      | Hs.8004   | KALRN     |
| rs10516386 | 4  | 21088565  | 0.0668 | 86.67% | 0.080770 | 0.320700 | 0.03578000 | 0.06831000 | NM_025221       | intron     | 0      | Hs.655705 | KCNIP4    |
| rs732289   | 3  | 152119035 | 0.2966 | 94.04% | 0.190300 | 0.336900 | 0.03578000 | 0.01397000 | NM_052995       | downstream | 7605   | Hs.380222 | CLRN1     |
| rs1797626  | 3  | 114308943 | 0.3433 | 94.04% | 0.225300 | 0.482400 | 0.03582000 | 0.00977200 | NM_033254       | upstream   | 105122 | Hs.591318 | BOC       |
| rs4131756  | 12 | 24204836  | 0.2233 | 72.28% | 0.313200 | 0.823400 | 0.03582000 | 0.05719000 | NM_144667       | downstream | 422984 | Hs.350668 | FLJ32894  |
| rs556968   | 11 | 105339334 | 0.3470 | 94.04% | 0.500100 | 0.223900 | 0.03582000 | 0.08483000 | NM_000829       | intron     | 0      | Hs.503743 | GRIA4     |
| rs1357194  | 6  | 115019312 | 0.1309 | 96.49% | 1.000000 | 0.227600 | 0.03586000 | 0.04301000 | ENST00000386065 | downstream | 275452 | ---       | ---       |
| rs4903076  | 14 | 39382590  | 0.3223 | 95.79% | 0.071580 | 0.323300 | 0.03586000 | 0.04113000 | NM_203301       | upstream   | 411219 | Hs.324342 | FBXO33    |
| rs10506292 | 12 | 49031020  | 0.2519 | 94.04% | 0.517900 | 1.000000 | 0.03587000 | 0.03491000 | ENST00000380174 | downstream | 2674   | ---       | ---       |
| rs1252041  | 9  | 119484618 | 0.1204 | 94.74% | 0.777900 | 0.382100 | 0.03587000 | 0.02521000 | NM_138554       | upstream   | 21853  | Hs.174312 | TLR4      |
| rs10487275 | 7  | 107197515 | 0.3515 | 93.33% | 0.282100 | 0.488100 | 0.03588000 | 0.31710000 | NM_000111       | intron     | 0      | Hs.1650   | SLC26A3   |
| rs10493632 | 1  | 80227457  | 0.0195 | 89.82% | 0.085660 | 1.000000 | 0.03593000 | 0.09245000 | ENST00000294631 | upstream   | 982507 | ---       | ---       |
| rs664815   | 1  | 225358116 | 0.3457 | 94.39% | 0.344800 | 0.751100 | 0.03594000 | 0.16120000 | NM_003607       | intron     | 0      | Hs.35433  | CDC42BPA  |
| rs1468786  | 7  | 12050906  | 0.4547 | 92.98% | 1.000000 | 0.761700 | 0.03595000 | 0.07221000 | NM_018374       | upstream   | 170047 | Hs.396358 | TMEM106B  |
| rs10488272 | 7  | 83672266  | 0.0957 | 97.19% | 1.000000 | 1.000000 | 0.03596000 | 0.05776000 | NM_006080       | upstream   | 10421  | Hs.252451 | SEMA3A    |
| rs10507887 | 13 | 77885957  | 0.1757 | 96.84% | 0.147200 | 0.770200 | 0.03597000 | 0.08495000 | NM_006237       | downstream | 185271 | Hs.654522 | POU4F1    |
| rs3868879  | 3  | 114254158 | 0.2126 | 86.67% | 0.034760 | 0.008483 | 0.03597000 | 0.04965000 | NM_033254       | upstream   | 159907 | Hs.591318 | BOC       |
| rs1870016  | 4  | 31206602  | 0.0480 | 95.09% | 1.000000 | 1.000000 | 0.03598000 | 0.04053000 | NM_032457       | downstream | 453033 | Hs.570785 | PCDH7     |
| rs1877269  | 3  | 170109714 | 0.4683 | 94.04% | 0.027010 | 0.021020 | 0.03598000 | 0.07333000 | NM_005241       | downstream | 175530 | Hs.656395 | EVII      |
| rs2199076  | 12 | 73809319  | 0.2088 | 87.37% | 0.248500 | 0.604600 | 0.03598000 | 0.18770000 | NM_153748       | intron     | 0      | Hs.591041 | KCN2C     |
| rs702458   | 7  | 124994203 | 0.0480 | 95.09% | 0.467100 | 1.000000 | 0.03598000 | 0.01337000 | NM_001042594    | upstream   | 637093 | Hs.31968  | POT1      |
| rs2089190  | 5  | 171972970 | 0.4850 | 93.33% | 0.461200 | 1.000000 | 0.03599000 | 0.02571000 | ENST00000355361 | upstream   | 3929   | ---       | ---       |
| rs637074   | 12 | 51395424  | 0.4408 | 85.96% | 0.001784 | 0.071760 | 0.03600000 | 0.06104000 | NM_175078       | upstream   | 11910  | Hs.334989 | KRT77     |
| rs10496583 | 2  | 122835383 | 0.3566 | 92.98% | 0.351500 | 0.384300 | 0.03602000 | 0.12450000 | NM_004622       | downstream | 595970 | Hs.75066  | TSN       |
| rs2347713  | 7  | 134065068 | 0.3794 | 90.18% | 0.691100 | 0.523100 | 0.03603000 | 0.01689000 | NM_033140       | upstream   | 49643  | Hs.490203 | CALD1     |
| rs4376787  | 1  | 96172071  | 0.4517 | 94.39% | 0.048910 | 0.120400 | 0.03605000 | 0.04900000 | ENST00000363930 | upstream   | 291974 | ---       | ---       |
| rs10496245 | 2  | 80940209  | 0.4596 | 91.23% | 0.169600 | 0.337400 | 0.03607000 | 0.02576000 | NM_004389       | downstream | 211701 | Hs.167368 | CTNNA2    |

|            |    |           |        |        |          |          |            |            |                 |            |         |           |          |
|------------|----|-----------|--------|--------|----------|----------|------------|------------|-----------------|------------|---------|-----------|----------|
| rs5543     | 2  | 40195109  | 0.2381 | 95.79% | 0.617300 | 0.496600 | 0.03607000 | 0.06921000 | NM_021097       | 3UTR       | 0       | Hs.468274 | SLC8A1   |
| rs10515366 | 5  | 106068927 | 0.1308 | 97.89% | 1.000000 | 1.000000 | 0.03609000 | 0.03986000 | NM_001962       | downstream | 671562  | Hs.658451 | EFNA5    |
| rs200145   | 6  | 143385463 | 0.1308 | 97.89% | 0.796100 | 1.000000 | 0.03609000 | 0.05972000 | NM_016108       | upstream   | 38243   | Hs.567501 | AIG1     |
| rs942835   | 1  | 120064541 | 0.1308 | 97.89% | 0.440100 | 0.573700 | 0.03609000 | 0.09387000 | NM_006623       | intron     | 0       | Hs.487296 | PHGDH    |
| rs1358091  | 2  | 184735915 | 0.2664 | 90.88% | 1.000000 | 1.000000 | 0.03610000 | 0.02510000 | NM_194250       | upstream   | 436017  | Hs.159528 | ZNF804A  |
| rs3119882  | 13 | 60263985  | 0.4979 | 84.91% | 0.608500 | 0.424400 | 0.03611000 | 0.13600000 | ENST00000384127 | downstream | 2191    | ---       | ---      |
| rs2236158  | 20 | 17882961  | 0.2481 | 94.74% | 0.744000 | 0.452000 | 0.03612000 | 0.13690000 | NM_014426       | intron     | 0       | Hs.316890 | SNX5     |
| rs1701586  | 18 | 59645607  | 0.1136 | 95.79% | 0.003057 | 0.093670 | 0.03614000 | 0.48710000 | NM_001040147    | downstream | 22024   | Hs.138202 | SERPINB7 |
| rs9292166  | 5  | 57867126  | 0.1377 | 92.98% | 0.300300 | 0.040380 | 0.03614000 | 0.06355000 | NM_152687       | downstream | 39184   | Hs.547697 | C5orf29  |
| rs2339686  | 10 | 52436044  | 0.3165 | 97.54% | 1.000000 | 0.855300 | 0.03615000 | 0.10770000 | ENST00000373985 | intron     | 0       | ---       | ---      |
| rs10494190 | 1  | 117194463 | 0.1318 | 97.19% | 0.797500 | 0.575700 | 0.03618000 | 0.01800000 | NM_020440       | upstream   | 59739   | Hs.418093 | PTGFRN   |
| rs1378147  | 18 | 67302947  | 0.3728 | 97.89% | 0.160100 | 0.121200 | 0.03618000 | 0.01561000 | NM_182511       | downstream | 1051948 | Hs.569851 | CBLN2    |
| rs1338787  | 13 | 54688732  | 0.2820 | 93.33% | 0.047950 | 0.003660 | 0.03619000 | 0.07075000 | ENST00000258651 | upstream   | 775281  | ---       | ---      |
| rs1572239  | 6  | 155658406 | 0.3740 | 83.51% | 0.003527 | 0.004681 | 0.03620000 | 0.09460000 | NM_016020       | intron     | 0       | Hs.279908 | TFB1M    |
| rs278465   | 3  | 74300577  | 0.2500 | 94.74% | 0.516000 | 0.076730 | 0.03620000 | 0.06279000 | NM_020872       | downstream | 93835   | Hs.12723  | CNTN3    |
| rs1918891  | 2  | 228870980 | 0.2338 | 97.54% | 0.507700 | 1.000000 | 0.03621000 | 0.14450000 | NM_030623       | upstream   | 116394  | Hs.436306 | SPHKAP   |
| rs7005262  | 8  | 14903851  | 0.4426 | 94.74% | 0.217900 | 0.755700 | 0.03621000 | 0.26940000 | NM_139167       | intron     | 0       | Hs.676196 | SGCZ     |
| rs10493115 | 1  | 43479870  | 0.1903 | 94.04% | 0.425700 | 0.788700 | 0.03622000 | 0.03226000 | ENST00000315972 | CDS        | 0       | ---       | ---      |
| rs725040   | 13 | 91066847  | 0.3763 | 97.89% | 0.898900 | 0.618600 | 0.03622000 | 0.06759000 | NM_004466       | intron     | 0       | Hs.655675 | GPC5     |
| rs10483251 | 14 | 20741117  | 0.4480 | 94.39% | 1.000000 | 0.276800 | 0.03624000 | 0.12070000 | NM_004500       | downstream | 7440    | Hs.508848 | HNRNPC   |
| rs10515460 | 5  | 132718332 | 0.1345 | 96.49% | 1.000000 | 0.776500 | 0.03624000 | 0.02875000 | NM_015082       | intron     | 0       | Hs.483390 | FSTL4    |
| rs10520213 | 4  | 173158174 | 0.0229 | 76.49% | 1.000000 | 1.000000 | 0.03624000 | 0.07298000 | NM_001034845    | intron     | 0       | Hs.386236 | GALNT17  |
| rs10505781 | 12 | 14104370  | 0.1412 | 91.93% | 0.317700 | 0.170200 | 0.03625000 | 0.04629000 | NM_000834       | upstream   | 80051   | Hs.654430 | RIN2B    |
| rs9307048  | 4  | 89368594  | 0.1935 | 91.58% | 0.016730 | 0.013470 | 0.03625000 | 0.36400000 | ENST00000362456 | downstream | 1589    | ---       | ---      |
| rs2060     | 1  | 215560722 | 0.3521 | 93.68% | 0.286100 | 0.484400 | 0.03626000 | 0.05544000 | NM_018040       | downstream | 109735  | Hs.420757 | GPATCH2  |
| rs2321996  | 13 | 58577337  | 0.2197 | 92.63% | 0.594900 | 1.000000 | 0.03627000 | 0.04008000 | ENST00000364727 | upstream   | 374867  | ---       | ---      |
| rs10504009 | 8  | 37458281  | 0.1842 | 93.33% | 0.838600 | 0.819400 | 0.03628000 | 0.13730000 | NM_021631       | downstream | 592295  | Hs.651853 | FKSG2    |
| rs295603   | 11 | 55187106  | 0.1152 | 85.26% | 0.000000 | 0.000001 | 0.03629000 | 0.11190000 | NM_001004704    | intron     | 0       | Hs.706616 | OR4C6    |
| rs10517612 | 4  | 156145501 | 0.0188 | 93.33% | 1.000000 | 1.000000 | 0.03632000 | 0.02266000 | NM_144979       | downstream | 176087  | Hs.133095 | RBM46    |
| rs1945873  | 11 | 91315531  | 0.3212 | 96.14% | 0.677500 | 0.713800 | 0.03632000 | 0.15260000 | NM_012124       | upstream   | 1719704 | Hs.22857  | CHORDC1  |
| rs10483454 | 14 | 35046027  | 0.1636 | 94.39% | 0.659500 | 1.000000 | 0.03633000 | 0.04386000 | NM_032594       | upstream   | 26972   | Hs.62813  | INSM2    |
| rs3798393  | 6  | 117838661 | 0.3577 | 86.32% | 0.001438 | 0.021960 | 0.03633000 | 0.01864000 | NM_002944       | intron     | 0       | Hs.1041   | ROS1     |
| rs2712767  | 18 | 18151170  | 0.4000 | 89.47% | 0.241500 | 0.114800 | 0.03635000 | 0.01582000 | NM_022840       | downstream | 712360  | Hs.126888 | METTL4   |
| rs347311   | 1  | 160570531 | 0.3136 | 97.89% | 0.331100 | 0.355000 | 0.03636000 | 0.05849000 | NM_014697       | intron     | 0       | Hs.655000 | NOS1AP   |
| rs10489252 | 1  | 170014768 | 0.1275 | 89.47% | 0.092830 | 0.129900 | 0.03641000 | 0.04511000 | NM_001007239    | upstream   | 2691    | Hs.494705 | KIAA0859 |
| rs1390593  | 8  | 50759834  | 0.1336 | 97.19% | 0.438300 | 1.000000 | 0.03643000 | 0.03101000 | NM_018967       | upstream   | 709492  | Hs.584914 | STNG1    |
| rs978178   | 1  | 49962719  | 0.3534 | 93.33% | 0.502000 | 0.485000 | 0.03645000 | 0.10220000 | ENST00000334103 | intron     | 0       | ---       | ---      |
| rs1628472  | 3  | 117717496 | 0.2688 | 97.89% | 0.285200 | 0.155400 | 0.03646000 | 0.04955000 | NM_002338       | upstream   | 70928   | Hs.657246 | LSAMP    |
| rs2078542  | 2  | 148122694 | 0.2688 | 97.89% | 0.365100 | 0.155400 | 0.03646000 | 0.00325300 | NM_001616       | upstream   | 196373  | Hs.470174 | ACVR2A   |
| rs10518871 | 15 | 54805516  | 0.1077 | 91.23% | 0.193900 | 1.000000 | 0.03647000 | 0.02712000 | NM_001002843    | intron     | 0       | Hs.511477 | ZNF280D  |
| rs2884516  | 4  | 150122279 | 0.1389 | 94.74% | 0.069640 | 0.258300 | 0.03647000 | 0.18130000 | ENST00000365396 | downstream | 9894    | ---       | ---      |
| rs10502606 | 18 | 28561872  | 0.2948 | 94.04% | 0.659100 | 0.167300 | 0.03649000 | 0.20000000 | NM_020805       | intron     | 0       | Hs.446164 | KLHL14   |
| rs710588   | 3  | 191301129 | 0.2566 | 93.68% | 0.151300 | 0.670400 | 0.03649000 | 0.02600000 | NM_018192       | intron     | 0       | Hs.374191 | LEPREL1  |
| rs10492214 | 12 | 105818888 | 0.1445 | 92.28% | 0.082100 | 0.584100 | 0.03651000 | 0.06494000 | NM_018157       | downstream | 13698   | Hs.131306 | RIC8B    |
| rs10508751 | 10 | 30294004  | 0.0189 | 92.98% | 0.082830 | 0.008646 | 0.03651000 | 0.03044000 | NM_021738       | upstream   | 330097  | Hs.499209 | SVIL     |
| rs10514474 | 16 | 78548724  | 0.0187 | 94.04% | 1.000000 | 1.000000 | 0.03651000 | 0.01201000 | NM_001031804    | upstream   | 356612  | Hs.134859 | MAF      |
| rs495860   | 6  | 125438744 | 0.0187 | 94.04% | 0.081920 | 1.000000 | 0.03651000 | 0.10230000 | NM_152553       | intron     | 0       | Hs.368639 | RNF217   |
| rs2459442  | 10 | 37332756  | 0.3781 | 97.89% | 0.373300 | 0.759500 | 0.03654000 | 0.00888900 | NM_052997       | upstream   | 122035  | Hs.373787 | ANKRD30A |
| rs1558699  | 7  | 77930588  | 0.4944 | 93.68% | 0.625500 | 0.451200 | 0.03656000 | 0.12100000 | NM_012301       | intron     | 0       | Hs.654788 | MAGI2    |
| rs3757798  | 7  | 117659225 | 0.0618 | 93.68% | 0.259600 | 1.000000 | 0.03656000 | 0.13910000 | NM_019644       | intron     | 0       | Hs.657737 | ANKRD7   |
| rs6686086  | 1  | 191902023 | 0.4134 | 89.12% | 1.000000 | 0.532300 | 0.03657000 | 0.04862000 | NM_024529       | downstream | 414344  | Hs.576497 | CDC73    |
| rs6984320  | 8  | 77352569  | 0.1313 | 97.54% | 0.440200 | 0.772100 | 0.03657000 | 0.02079000 | NM_024721       | upstream   | 426266  | Hs.458973 | ZFXH4    |
| rs10520506 | 4  | 182863700 | 0.2472 | 95.09% | 0.871000 | 1.000000 | 0.03661000 | 0.38340000 | ENST00000378957 | downstream | 182552  | ---       | ---      |
| rs2075397  | 12 | 113053753 | 0.2670 | 97.89% | 0.759800 | 0.413200 | 0.03661000 | 0.06907000 | NM_016196       | upstream   | 165259  | Hs.7482   | RBM19    |



|            |    |           |        |        |          |          |            |            |                 |            |         |           |           |
|------------|----|-----------|--------|--------|----------|----------|------------|------------|-----------------|------------|---------|-----------|-----------|
| rs2383143  | 9  | 20639540  | 0.2127 | 94.04% | 0.855100 | 0.206100 | 0.03661000 | 0.12100000 | NM_017794       | upstream   | 8768    | Hs.408652 | KIAA1797  |
| rs10506589 | 12 | 69013265  | 0.1203 | 93.33% | 1.000000 | 0.668400 | 0.03662000 | 0.10360000 | NM_014515       | intron     | 0       | Hs.133350 | CNOT2     |
| rs2829746  | 21 | 25719960  | 0.0332 | 89.82% | 1.000000 | 1.000000 | 0.03663000 | 0.03987000 | ENST00000332587 | downstream | 4125    | ---       | ---       |
| rs6574548  | 14 | 79690049  | 0.1129 | 97.89% | 0.367900 | 0.528400 | 0.03663000 | 0.04564000 | NM_001007023    | downstream | 46546   | Hs.202354 | DIO2      |
| rs4061659  | 17 | 1944194   | 0.3822 | 96.84% | 0.251300 | 0.409300 | 0.03664000 | 0.07737000 | NM_017575       | intron     | 0       | Hs.448342 | SMG6      |
| rs10514925 | 17 | 42799867  | 0.0874 | 94.39% | 0.436200 | 0.568700 | 0.03666000 | 0.07775000 | NM_152347       | intron     | 0       | Hs.463303 | C17orf57  |
| rs628926   | 9  | 119641627 | 0.3120 | 82.11% | 0.000007 | 0.000028 | 0.03666000 | 0.03637000 | NM_138554       | downstream | 122657  | Hs.174312 | TLR4      |
| rs7094169  | 10 | 12127660  | 0.4918 | 85.96% | 0.249800 | 0.264700 | 0.03667000 | 0.03143000 | NM_015542       | upstream   | 2821    | Hs.370689 | UPF2      |
| rs10251209 | 7  | 49584973  | 0.3030 | 81.05% | 0.121100 | 0.204500 | 0.03670000 | 0.06502000 | NM_198570       | upstream   | 198825  | Hs.677488 | VWC2      |
| rs10517210 | 4  | 30253178  | 0.1429 | 93.33% | 0.801200 | 1.000000 | 0.03670000 | 0.08007000 | NM_032457       | upstream   | 78965   | Hs.570785 | PCDH7     |
| rs10488127 | 7  | 10291095  | 0.0185 | 94.74% | 1.000000 | 1.000000 | 0.03671000 | 0.03752000 | ENST00000387411 | downstream | 61932   | ---       | ---       |
| rs4140470  | 20 | 7155479   | 0.4557 | 95.09% | 0.625300 | 0.367800 | 0.03672000 | 0.03390000 | NM_001200       | downstream | 446552  | Hs.73853  | BMP2      |
| rs10489160 | 1  | 22445846  | 0.1788 | 96.14% | 0.213900 | 0.816300 | 0.03673000 | 0.12400000 | NM_030761       | upstream   | 103808  | Hs.25766  | WNT4      |
| rs720313   | 11 | 119425320 | 0.1788 | 96.14% | 0.679500 | 0.485600 | 0.03673000 | 0.13120000 | NM_012101       | downstream | 61885   | Hs.504115 | TRIM29    |
| rs723363   | 4  | 111943950 | 0.3172 | 97.89% | 0.169100 | 0.510700 | 0.03673000 | 0.01708000 | NM_000325       | upstream   | 180247  | Hs.643588 | PTX2      |
| rs6560488  | 9  | 77845747  | 0.4721 | 94.39% | 0.625500 | 0.764300 | 0.03674000 | 0.05747000 | NM_006200       | intron     | 0       | Hs.368542 | PCSK5     |
| rs8018273  | 14 | 86867956  | 0.4906 | 93.68% | 1.000000 | 0.222900 | 0.03674000 | 0.05428000 | NM_001037525    | downstream | 601157  | Hs.513439 | GALC      |
| rs3804338  | 6  | 106879466 | 0.2500 | 94.04% | 0.102000 | 0.265600 | 0.03675000 | 0.04542000 | NM_004849       | intron     | 0       | Hs.486063 | ATG5      |
| rs10518812 | 15 | 41440229  | 0.2054 | 84.56% | 0.435000 | 0.496200 | 0.03676000 | 0.02436000 | NM_152455       | downstream | 279     | Hs.418287 | ZSCAN29   |
| rs1992331  | 8  | 62438596  | 0.4868 | 92.98% | 0.269600 | 0.540800 | 0.03676000 | 0.00117600 | NM_173519       | intron     | 0       | Hs.654963 | RLBP1L1   |
| rs1287293  | 1  | 236434231 | 0.1159 | 96.84% | 0.771300 | 0.749400 | 0.03677000 | 0.02045000 | ENST00000385340 | downstream | 121379  | ---       | ---       |
| rs955779   | 10 | 53613893  | 0.2706 | 97.89% | 0.649500 | 1.000000 | 0.03678000 | 0.04373000 | NM_006258       | intron     | 0       | Hs.654556 | PRKG1     |
| rs788063   | 10 | 29301503  | 0.1022 | 94.39% | 0.171300 | 0.145300 | 0.03679000 | 0.08271000 | NM_032517       | upstream   | 316493  | Hs.558572 | LYZL1     |
| rs604844   | 6  | 154496665 | 0.2235 | 92.63% | 0.859000 | 0.312800 | 0.03680000 | 0.05533000 | NM_001008503    | intron     | 0       | Hs.2353   | OPRM1     |
| rs2072464  | 2  | 20303107  | 0.2885 | 79.65% | 0.106000 | 0.195800 | 0.03681000 | 0.30460000 | NM_015317       | downstream | 8826    | Hs.467824 | PUM2      |
| rs4072139  | 10 | 62327362  | 0.3721 | 91.93% | 0.354500 | 0.866200 | 0.03683000 | 0.12190000 | NM_001032380    | intron     | 0       | Hs.148670 | RHOBTB1   |
| rs541763   | 1  | 120046930 | 0.3569 | 94.39% | 0.791500 | 0.731400 | 0.03684000 | 0.02729000 | NM_006623       | upstream   | 9103    | Hs.487296 | PHGDH     |
| rs1436136  | 4  | 113282975 | 0.3607 | 91.93% | 1.000000 | 0.871800 | 0.03685000 | 0.11090000 | NM_152400       | upstream   | 3152    | Hs.23439  | C4orf32   |
| rs957574   | 21 | 22054437  | 0.4613 | 95.09% | 0.141900 | 0.100600 | 0.03686000 | 0.22190000 | ENST00000358903 | downstream | 115964  | ---       | ---       |
| rs10507889 | 13 | 77917117  | 0.2683 | 90.88% | 0.272400 | 0.297700 | 0.03688000 | 0.02499000 | NM_006237       | downstream | 154111  | Hs.654522 | POU4F1    |
| rs10515283 | 5  | 98121571  | 0.1255 | 90.88% | 0.258800 | 0.213200 | 0.03688000 | 0.06257000 | NM_173670       | upstream   | 11329   | Hs.526902 | RGMB      |
| rs10486010 | 7  | 97316254  | 0.1545 | 96.49% | 0.817800 | 1.000000 | 0.03689000 | 0.11150000 | NM_183356       | downstream | 3125    | Hs.489207 | ASNS      |
| rs7829511  | 8  | 84033179  | 0.3863 | 97.19% | 0.526500 | 0.622900 | 0.03689000 | 0.02442000 | NM_152837       | upstream   | 1116189 | Hs.492121 | SNX16     |
| rs10490861 | 3  | 7004628   | 0.1686 | 91.58% | 0.006596 | 0.052310 | 0.03690000 | 0.19590000 | NM_181874       | intron     | 0       | Hs.660131 | GRM7      |
| rs10504743 | 8  | 82951580  | 0.1199 | 95.09% | 0.392400 | 1.000000 | 0.03690000 | 0.10010000 | NM_152837       | upstream   | 34590   | Hs.492121 | SNX16     |
| rs10510576 | 3  | 26450054  | 0.1756 | 97.89% | 0.678700 | 0.166300 | 0.03690000 | 0.05535000 | NM_052953       | upstream   | 189247  | Hs.517868 | LRRC3B    |
| rs10512009 | 9  | 72991086  | 0.3835 | 97.89% | 0.043490 | 0.220800 | 0.03690000 | 0.05705000 | NM_206945       | intron     | 0       | Hs.47288  | TRPM3     |
| rs7685129  | 4  | 17912310  | 0.2106 | 95.79% | 0.717500 | 0.679700 | 0.03690000 | 0.03740000 | NM_153686       | upstream   | 279713  | Hs.446201 | LCORL     |
| rs10518335 | 4  | 120741620 | 0.1222 | 93.33% | 0.249000 | 0.132200 | 0.03691000 | 0.06124000 | NM_033437       | intron     | 0       | Hs.647971 | PDE5A     |
| rs10520248 | 4  | 174086924 | 0.0682 | 84.91% | 1.000000 | 1.000000 | 0.03691000 | 0.09151000 | NM_001034845    | intron     | 0       | Hs.386236 | GALNT17   |
| rs6962216  | 7  | 144488779 | 0.2044 | 96.14% | 0.711200 | 0.673300 | 0.03692000 | 0.01571000 | ENST00000363803 | upstream   | 310669  | ---       | ---       |
| rs10498452 | 14 | 53304673  | 0.1033 | 95.09% | 1.000000 | 1.000000 | 0.03693000 | 0.03256000 | NM_130851       | downstream | 181534  | Hs.68879  | BMP4      |
| rs914959   | 1  | 97413151  | 0.3577 | 93.68% | 0.045120 | 0.119400 | 0.03694000 | 0.06054000 | NM_000110       | intron     | 0       | Hs.335034 | DPYD      |
| rs315499   | 17 | 27045434  | 0.3136 | 82.81% | 0.048480 | 0.031910 | 0.03696000 | 0.08394000 | ENST00000365156 | upstream   | 19451   | ---       | ---       |
| rs10501535 | 11 | 82011466  | 0.1155 | 97.19% | 0.145900 | 0.206300 | 0.03698000 | 0.04702000 | ENST00000357859 | upstream   | 66783   | ---       | ---       |
| rs1403439  | 3  | 34878928  | 0.4668 | 95.09% | 0.331100 | 0.296400 | 0.03698000 | 0.30960000 | NM_001025069    | upstream   | 779925  | Hs.475902 | ARPP-21   |
| rs10491916 | 9  | 9875311   | 0.0379 | 97.19% | 1.000000 | 1.000000 | 0.03699000 | 0.11310000 | ENST00000363183 | downstream | 442959  | ---       | ---       |
| rs10516901 | 4  | 92899736  | 0.1699 | 90.88% | 0.508000 | 0.806400 | 0.03703000 | 0.08859000 | NM_207491       | downstream | 160505  | Hs.654735 | MGC48628  |
| rs357749   | 2  | 71225997  | 0.3500 | 94.74% | 0.688000 | 0.635100 | 0.03705000 | 0.10410000 | NM_005791       | intron     | 0       | Hs.656208 | MPHOSPH10 |
| rs9790802  | 4  | 27145627  | 0.3327 | 96.49% | 0.135800 | 0.157400 | 0.03705000 | 0.05086000 | ENST00000363691 | upstream   | 311480  | ---       | ---       |
| rs1351232  | 3  | 144051683 | 0.4593 | 94.74% | 0.328000 | 0.877800 | 0.03706000 | 0.24580000 | NM_013363       | intron     | 0       | Hs.8944   | PCOLCE2   |
| rs7911323  | 10 | 122047679 | 0.1558 | 96.84% | 0.820900 | 1.000000 | 0.03706000 | 0.29690000 | ENST00000330207 | downstream | 56738   | ---       | ---       |
| rs841122   | 5  | 87090681  | 0.4539 | 95.09% | 0.327100 | 0.093530 | 0.03706000 | 0.02092000 | NM_153354       | downstream | 436100  | Hs.379972 | TMEM161B  |
| rs10516102 | 5  | 173018153 | 0.0451 | 85.61% | 0.075030 | 0.132600 | 0.03709000 | 0.01728000 | NM_138369       | upstream   | 41891   | Hs.425091 | FAM44B    |

|            |    |           |        |        |          |          |            |            |                 |            |         |           |           |
|------------|----|-----------|--------|--------|----------|----------|------------|------------|-----------------|------------|---------|-----------|-----------|
| rs10504762 | 8  | 83590018  | 0.1340 | 87.72% | 0.001244 | 0.034040 | 0.03710000 | 0.03102000 | NM_152837       | upstream   | 673028  | Hs.492121 | SNX16     |
| rs10513637 | 3  | 22177217  | 0.2183 | 94.04% | 0.150300 | 0.157100 | 0.03714000 | 0.07698000 | NM_024697       | upstream   | 409397  | Hs.21026  | ZNF385D   |
| rs10501430 | 11 | 78052837  | 0.4742 | 95.09% | 0.051520 | 0.097430 | 0.03717000 | 0.01350000 | ENST00000278550 | intron     | 0       | ---       | ---       |
| rs26992    | 5  | 65459341  | 0.2716 | 97.54% | 1.000000 | 0.837900 | 0.03717000 | 0.01682000 | NM_001006600    | downstream | 46735   | Hs.591774 | ERBB2IP   |
| rs744318   | 15 | 55669181  | 0.3438 | 95.44% | 0.423500 | 1.000000 | 0.03717000 | 0.06630000 | NM_001018091    | upstream   | 2225    | Hs.437256 | Gcom1     |
| rs9316974  | 13 | 57658355  | 0.3284 | 95.09% | 0.784300 | 1.000000 | 0.03718000 | 0.06439000 | ENST00000365552 | downstream | 194757  | ---       | ---       |
| rs10502228 | 11 | 117618793 | 0.2782 | 96.49% | 0.550500 | 0.841900 | 0.03719000 | 0.03357000 | NM_198275       | intron     | 0       | Hs.15396  | MPZL3     |
| rs10502887 | 18 | 43433881  | 0.3668 | 85.61% | 0.053430 | 0.048680 | 0.03720000 | 0.16700000 | ENST00000328279 | downstream | 22660   | ---       | ---       |
| rs7657136  | 4  | 182522209 | 0.3249 | 97.19% | 0.217000 | 0.326200 | 0.03720000 | 0.12540000 | ENST00000378957 | upstream   | 158598  | ---       | ---       |
| rs722726   | 12 | 113065706 | 0.3833 | 90.18% | 0.000203 | 0.006393 | 0.03721000 | 0.04837000 | NM_016196       | upstream   | 177212  | Hs.7482   | RBM19     |
| rs9308786  | 2  | 4607030   | 0.1423 | 93.68% | 0.800800 | 0.276800 | 0.03724000 | 0.03565000 | ENST00000387792 | downstream | 245436  | ---       | ---       |
| rs2832296  | 21 | 29663325  | 0.2860 | 87.72% | 0.008636 | 0.048270 | 0.03728000 | 0.02521000 | NM_001011545    | downstream | 17404   | Hs.154276 | BACH1     |
| rs2837780  | 21 | 40972828  | 0.4594 | 95.09% | 0.066160 | 0.021760 | 0.03732000 | 0.12480000 | NM_001389       | intron     | 0       | Hs.397800 | DSCAM     |
| rs997385   | 1  | 42094639  | 0.2199 | 93.33% | 1.000000 | 0.413600 | 0.03732000 | 0.05612000 | NM_024503       | intron     | 0       | Hs.591503 | HIVEP3    |
| rs1022311  | 2  | 180264129 | 0.1563 | 95.44% | 0.493500 | 0.497000 | 0.03733000 | 0.04644000 | NM_152520       | intron     | 0       | Hs.655005 | ZNF385B   |
| rs10494115 | 1  | 43479622  | 0.1877 | 94.39% | 0.424100 | 0.782800 | 0.03733000 | 0.03884000 | ENST00000372493 | intron     | 0       | ---       | ---       |
| rs2060415  | 8  | 109077209 | 0.4907 | 94.74% | 0.808400 | 1.000000 | 0.03733000 | 0.07121000 | NM_178565       | intron     | 0       | Hs.444834 | RSPO2     |
| rs293376   | 15 | 87436272  | 0.4907 | 94.74% | 0.808400 | 0.763800 | 0.03733000 | 0.04778000 | ENST00000352732 | intron     | 0       | ---       | ---       |
| rs245914   | 7  | 29184684  | 0.1458 | 92.63% | 1.000000 | 0.283200 | 0.03734000 | 0.06437000 | NM_004067       | upstream   | 16167   | Hs.654611 | CHN2      |
| rs10505141 | 8  | 111223962 | 0.0738 | 95.09% | 0.644600 | 1.000000 | 0.03738000 | 0.14220000 | NM_014379       | upstream   | 167827  | Hs.13285  | KCNV1     |
| rs10504205 | 8  | 57655013  | 0.4667 | 94.74% | 0.027570 | 0.071540 | 0.03739000 | 0.13300000 | NM_006211       | upstream   | 133870  | Hs.339831 | PENK      |
| rs10500925 | 11 | 22371525  | 0.2068 | 97.54% | 0.855800 | 0.802800 | 0.03741000 | 0.03870000 | NM_020346       | downstream | 13906   | Hs.242821 | SLC17A6   |
| rs1764142  | 6  | 956570    | 0.1896 | 94.39% | 0.844100 | 0.423100 | 0.03741000 | 0.19030000 | NM_018303       | upstream   | 318461  | Hs.484412 | EXOC2     |
| rs2782451  | 13 | 68802710  | 0.4870 | 94.39% | 0.273200 | 0.069330 | 0.03742000 | 0.04526000 | NM_020866       | downstream | 370016  | Hs.508201 | KLHL1     |
| rs10501004 | 11 | 25304107  | 0.0192 | 91.58% | 1.000000 | 1.000000 | 0.03743000 | 0.14430000 | NM_001009909    | downstream | 247327  | Hs.144138 | LUZP2     |
| rs6083461  | 20 | 2424778   | 0.3688 | 92.28% | 0.234700 | 0.733100 | 0.03744000 | 0.04761000 | NM_024325       | intron     | 0       | Hs.516846 | ZNF343    |
| rs1543468  | 1  | 232415048 | 0.4333 | 89.47% | 0.202700 | 0.749500 | 0.03745000 | 0.02288000 | NM_173508       | intron     | 0       | Hs.158748 | SLC35F3   |
| rs601828   | 11 | 30017096  | 0.0057 | 91.93% | 1.000000 | 1.000000 | 0.03746000 | 0.99880000 | NM_002233       | upstream   | 22032   | Hs.592002 | KCNA4     |
| rs10507198 | 12 | 104625308 | 0.2154 | 93.68% | 0.046130 | 0.132600 | 0.03747000 | 0.21450000 | NM_207376       | downstream | 335883  | ---       | OCC-1     |
| rs3844166  | 1  | 77643728  | 0.0827 | 97.54% | 1.000000 | 0.692700 | 0.03747000 | 0.07328000 | NM_012093       | intron     | 0       | Hs.559718 | AK5       |
| rs10504842 | 8  | 89484318  | 0.2025 | 97.89% | 0.194300 | 0.289200 | 0.03749000 | 0.06136000 | NM_003821       | upstream   | 1354855 | Hs.103755 | RIPK2     |
| rs10512513 | 17 | 61965600  | 0.4981 | 94.74% | 0.903100 | 0.651000 | 0.03749000 | 0.06048000 | NM_002737       | intron     | 0       | Hs.531704 | PRKCA     |
| rs10514564 | 16 | 81298757  | 0.4981 | 94.74% | 0.714900 | 0.450800 | 0.03749000 | 0.05274000 | NM_001257       | upstream   | 150703  | Hs.654386 | CDH13     |
| rs34879254 | 6  | 46586309  | 0.2025 | 97.89% | 0.194300 | 0.137800 | 0.03749000 | 0.32070000 | NM_016593       | downstream | 39096   | Hs.387367 | CYP39A1   |
| rs229336   | 2  | 149729617 | 0.1878 | 85.96% | 0.003119 | 0.007863 | 0.03750000 | 0.07012000 | NM_177964       | intron     | 0       | Hs.357567 | LOC130576 |
| rs850434   | 6  | 97342285  | 0.0960 | 87.72% | 0.258300 | 1.000000 | 0.03750000 | 0.28940000 | NM_030784       | downstream | 10360   | Hs.632612 | GPR63     |
| rs10505183 | 8  | 113329508 | 0.1421 | 95.09% | 0.040920 | 0.030470 | 0.03751000 | 0.12180000 | NM_052900       | intron     | 0       | Hs.91381  | CSMD3     |
| rs7312252  | 12 | 49030438  | 0.2528 | 94.39% | 0.522900 | 1.000000 | 0.03753000 | 0.03103000 | ENST00000380174 | downstream | 3256    | ---       | ---       |
| rs9301029  | 13 | 104896251 | 0.1807 | 96.14% | 1.000000 | 0.770800 | 0.03755000 | 0.07456000 | NM_172370       | upstream   | 20342   | Hs.381382 | DAOA      |
| rs10493379 | 1  | 65818515  | 0.3604 | 92.98% | 1.000000 | 0.873600 | 0.03756000 | 0.17990000 | NM_001003680    | intron     | 0       | Hs.705413 | LEPR      |
| rs1488939  | 4  | 56213901  | 0.3871 | 97.89% | 0.129800 | 0.255800 | 0.03757000 | 0.24520000 | NM_006681       | upstream   | 16679   | Hs.418367 | NMU       |
| rs1927964  | 9  | 89587150  | 0.2175 | 94.39% | 0.375800 | 0.806100 | 0.03757000 | 0.00148500 | NM_001023564    | intron     | 0       | Hs.690450 | CTSL3     |
| rs240165   | 6  | 101149947 | 0.0376 | 97.89% | 1.000000 | 1.000000 | 0.03757000 | 0.07411000 | NM_006828       | intron     | 0       | Hs.486031 | ASCC3     |
| rs4129606  | 7  | 70598829  | 0.0376 | 97.89% | 0.323500 | 0.362100 | 0.03757000 | 0.05477000 | NM_022479       | intron     | 0       | Hs.488591 | WBSR17    |
| rs9287518  | 2  | 139879348 | 0.1227 | 94.39% | 0.777600 | 1.000000 | 0.03757000 | 0.04052000 | ENST00000384174 | upstream   | 106116  | ---       | ---       |
| rs10508408 | 10 | 10672427  | 0.2201 | 94.04% | 0.722400 | 1.000000 | 0.03758000 | 0.05957000 | NM_001025077    | upstream   | 575029  | Hs.309288 | CUGBP2    |
| rs7698530  | 4  | 73977981  | 0.2509 | 93.68% | 0.050080 | 0.089440 | 0.03758000 | 0.24440000 | NM_014243       | upstream   | 324601  | Hs.590919 | ADAMTS3   |
| rs10510793 | 3  | 57448790  | 0.0676 | 85.61% | 0.002108 | 0.003379 | 0.03760000 | 0.16350000 | ENST00000389536 | intron     | 0       | ---       | ---       |
| rs10513719 | 3  | 174992823 | 0.2831 | 95.44% | 1.000000 | 0.226100 | 0.03760000 | 0.04826000 | NM_014932       | intron     | 0       | Hs.478289 | NLGN1     |
| rs10520475 | 4  | 182468476 | 0.0858 | 96.14% | 0.121300 | 0.102700 | 0.03760000 | 0.13710000 | ENST00000378957 | upstream   | 212331  | ---       | ---       |
| rs210056   | 6  | 90729099  | 0.1173 | 97.19% | 0.556600 | 0.660000 | 0.03760000 | 0.09992000 | NM_021813       | intron     | 0       | Hs.269764 | BACH2     |
| rs2189813  | 7  | 86190735  | 0.1799 | 97.54% | 0.839400 | 0.573700 | 0.03762000 | 0.12900000 | NM_000840       | intron     | 0       | Hs.590575 | GRM3      |
| rs10509897 | 10 | 111221178 | 0.0243 | 93.68% | 0.138900 | 0.184100 | 0.03763000 | 0.04786000 | NM_020383       | downstream | 393336  | Hs.390623 | XPNPEP1   |
| rs1390808  | 8  | 115601897 | 0.1056 | 94.74% | 1.000000 | 0.352100 | 0.03764000 | 0.22100000 | NM_014112       | downstream | 892074  | Hs.657018 | TRPS1     |

|            |    |           |        |        |          |          |            |            |                 |            |         |           |          |
|------------|----|-----------|--------|--------|----------|----------|------------|------------|-----------------|------------|---------|-----------|----------|
| rs1283726  | 8  | 108545032 | 0.0486 | 97.54% | 1.000000 | 1.000000 | 0.03767000 | 0.02462000 | NM_001146       | intron     | 0       | Hs.369675 | ANGPT1   |
| rs740600   | 10 | 118641872 | 0.3187 | 91.93% | 0.887600 | 0.741300 | 0.03767000 | 0.06729000 | NM_018330       | intron     | 0       | Hs.501140 | KIAA1598 |
| rs10495045 | 1  | 215484461 | 0.2970 | 95.09% | 0.771400 | 0.248500 | 0.03768000 | 0.05641000 | NM_206595       | upstream   | 154891  | Hs.444225 | ESRRG    |
| rs1160595  | 2  | 50988845  | 0.2383 | 97.19% | 0.623400 | 0.503900 | 0.03770000 | 0.06086000 | ENST00000378259 | upstream   | 80340   | ---       | ---      |
| rs1342744  | 6  | 16160498  | 0.3561 | 95.09% | 0.894700 | 1.000000 | 0.03770000 | 0.01485000 | NM_013262       | upstream   | 76798   | Hs.484738 | MYLIP    |
| rs1566584  | 1  | 42570352  | 0.0609 | 95.09% | 1.000000 | 1.000000 | 0.03771000 | 0.01966000 | NM_014947       | intron     | 0       | Hs.26023  | FOXJ3    |
| rs10500747 | 11 | 11728465  | 0.3760 | 90.53% | 0.145400 | 0.169600 | 0.03773000 | 0.09977000 | NM_017944       | upstream   | 91081   | Hs.577256 | USP47    |
| rs1805731  | 12 | 8986493   | 0.3989 | 97.19% | 0.008283 | 0.091300 | 0.03775000 | 0.05217000 | NM_002355       | intron     | 0       | Hs.134084 | M6PR     |
| rs10517265 | 4  | 32784855  | 0.0714 | 95.79% | 0.376500 | 0.366900 | 0.03777000 | 0.03614000 | NM_032457       | downstream | 2031286 | Hs.570785 | PCDH7    |
| rs10517335 | 4  | 34549602  | 0.0842 | 97.89% | 0.424900 | 1.000000 | 0.03777000 | 0.17890000 | NM_032457       | downstream | 3796033 | Hs.570785 | PCDH7    |
| rs9294019  | 6  | 77463618  | 0.1724 | 91.58% | 0.831000 | 0.365400 | 0.03777000 | 0.03045000 | NM_000863       | downstream | 765023  | Hs.123016 | HTR1B    |
| rs4808957  | 19 | 19428248  | 0.4182 | 96.49% | 0.901300 | 0.287500 | 0.03778000 | 0.13790000 | NM_017660       | intron     | 0       | Hs.696033 | GATAD2A  |
| rs10513965 | 18 | 65357521  | 0.3297 | 96.84% | 0.277500 | 0.334100 | 0.03779000 | 0.12100000 | NM_152721       | intron     | 0       | Hs.569915 | DOK6     |
| rs781382   | 14 | 51980688  | 0.1588 | 96.14% | 0.500400 | 0.743300 | 0.03779000 | 0.26060000 | NM_020784       | intron     | 0       | Hs.532609 | TXNDC16  |
| rs2122599  | 8  | 111137054 | 0.0845 | 97.54% | 0.426000 | 0.407700 | 0.03780000 | 0.08332000 | NM_014379       | upstream   | 80919   | Hs.13285  | KCNV1    |
| rs778432   | 1  | 56439397  | 0.1642 | 94.04% | 1.000000 | 0.804000 | 0.03780000 | 0.06599000 | NM_177414       | downstream | 293130  | Hs.405156 | PPAP2B   |
| rs10514519 | 16 | 80532566  | 0.0851 | 96.84% | 0.704200 | 0.223100 | 0.03782000 | 0.03421000 | NM_002661       | intron     | 0       | Hs.413111 | PLCG2    |
| rs545833   | 1  | 166956564 | 0.3662 | 94.39% | 0.036430 | 0.061740 | 0.03783000 | 0.04190000 | NM_001937       | intron     | 0       | Hs.80552  | DPT      |
| rs6573512  | 14 | 62925328  | 0.2306 | 90.53% | 0.158500 | 0.157400 | 0.03783000 | 0.07038000 | NM_006246       | intron     | 0       | Hs.334868 | PPP2R5E  |
| rs967287   | 2  | 156852400 | 0.3333 | 96.84% | 0.277900 | 0.746200 | 0.03783000 | 0.01133000 | NM_173173       | downstream | 36794   | Hs.563344 | NR4A2    |
| rs10497987 | 2  | 213555755 | 0.1349 | 97.54% | 0.797500 | 0.701900 | 0.03784000 | 0.01578000 | NM_016260       | downstream | 23834   | Hs.604950 | IKZF2    |
| rs1400060  | 12 | 71961188  | 0.1576 | 96.84% | 0.501100 | 0.803800 | 0.03784000 | 0.07923000 | NM_013381       | downstream | 615500  | Hs.199814 | TRHDE    |
| rs3761867  | 13 | 30613555  | 0.4118 | 95.44% | 0.455600 | 0.441400 | 0.03784000 | 0.05253000 | NM_006644       | intron     | 0       | Hs.36927  | HSPH1    |
| rs2066987  | 5  | 76892373  | 0.1208 | 94.39% | 1.000000 | 1.000000 | 0.03785000 | 0.08920000 | NM_018268       | upstream   | 68285   | Hs.482573 | WDR41    |
| rs2420178  | 1  | 68944457  | 0.2204 | 94.74% | 0.160100 | 0.106500 | 0.03785000 | 0.04720000 | NM_017779       | upstream   | 209071  | Hs.445098 | DEPDC1   |
| rs10488618 | 7  | 37979723  | 0.1041 | 94.39% | 0.505700 | 1.000000 | 0.03786000 | 0.08216000 | NM_017549       | downstream | 21658   | Hs.563491 | EPDR1    |
| rs10494396 | 1  | 161895132 | 0.0749 | 93.68% | 1.000000 | 1.000000 | 0.03786000 | 0.03769000 | ENST00000385703 | downstream | 149146  | ---       | ---      |
| rs10496819 | 2  | 139878846 | 0.1218 | 95.09% | 0.777700 | 1.000000 | 0.03786000 | 0.04724000 | ENST00000384174 | upstream   | 106618  | ---       | ---      |
| rs199055   | 6  | 23598096  | 0.0749 | 93.68% | 0.170500 | 1.000000 | 0.03786000 | 0.02956000 | ENST00000330282 | upstream   | 364765  | ---       | ---      |
| rs10504790 | 8  | 85087422  | 0.2565 | 94.39% | 0.874300 | 1.000000 | 0.03787000 | 0.12880000 | NM_173848       | upstream   | 516690  | Hs.121663 | RALYL    |
| rs644708   | 4  | 135906943 | 0.2190 | 84.91% | 0.706600 | 1.000000 | 0.03788000 | 0.12900000 | ENST00000384459 | downstream | 549082  | ---       | ---      |
| rs10507672 | 13 | 61194641  | 0.0741 | 94.74% | 0.166400 | 0.433500 | 0.03789000 | 0.03273000 | ENST00000387130 | upstream   | 64430   | ---       | ---      |
| rs1822891  | 11 | 26982453  | 0.2701 | 91.58% | 0.270900 | 0.297000 | 0.03791000 | 0.12560000 | NM_203371       | downstream | 7247    | Hs.705612 | FIBIN    |
| rs10484759 | 6  | 127078735 | 0.2177 | 95.09% | 0.720900 | 0.840900 | 0.03792000 | 0.02318000 | NM_032784       | upstream   | 402707  | Hs.135254 | RSPO3    |
| rs3733045  | 3  | 52618347  | 0.4981 | 92.98% | 0.805900 | 0.758100 | 0.03794000 | 0.20290000 | NM_181042       | intron     | 0       | Hs.189920 | PBRM1    |
| rs10513310 | 9  | 119644581 | 0.3979 | 82.46% | 0.000216 | 0.000056 | 0.03798000 | 0.05102000 | NM_138554       | downstream | 125611  | Hs.174312 | TLR4     |
| rs10515255 | 5  | 96547331  | 0.0830 | 97.19% | 0.103300 | 0.152400 | 0.03799000 | 0.03722000 | NM_018343       | upstream   | 2611    | Hs.27021  | RIOK2    |
| rs9309572  | 2  | 81323050  | 0.2743 | 90.18% | 0.002884 | 0.211800 | 0.03799000 | 0.07128000 | NM_004389       | downstream | 594542  | Hs.167368 | CTNNA2   |
| rs10512302 | 9  | 104487695 | 0.0591 | 97.89% | 0.608900 | 0.602600 | 0.03800000 | 0.16360000 | NM_001340       | upstream   | 309735  | Hs.3232   | CYLC2    |
| rs10512303 | 9  | 104487817 | 0.0591 | 97.89% | 0.608900 | 0.602600 | 0.03800000 | 0.16360000 | NM_001340       | upstream   | 309613  | Hs.3232   | CYLC2    |
| rs722183   | 11 | 7732438   | 0.0591 | 97.89% | 0.608900 | 0.602600 | 0.03800000 | 0.10400000 | ENST00000379801 | downstream | 7475    | ---       | ---      |
| rs10503669 | 8  | 19891970  | 0.0712 | 96.14% | 1.000000 | 1.000000 | 0.03803000 | 0.05370000 | NM_000237       | downstream | 24058   | Hs.180878 | LPL      |
| rs1427430  | 3  | 69838257  | 0.0487 | 97.19% | 1.000000 | 1.000000 | 0.03803000 | 0.10400000 | NM_198178       | upstream   | 57395   | Hs.166017 | MITF     |
| rs2806904  | 13 | 45383927  | 0.3311 | 80.00% | 0.294900 | 0.475100 | 0.03803000 | 0.05319000 | NM_015070       | downstream | 50388   | Hs.136102 | ZC3H13   |
| rs10505054 | 8  | 105192600 | 0.1807 | 96.14% | 0.041910 | 0.038480 | 0.03804000 | 0.13740000 | NM_014677       | intron     | 0       | Hs.655271 | RIMS2    |
| rs33436    | 19 | 35635517  | 0.4377 | 95.79% | 0.538800 | 0.764500 | 0.03807000 | 0.01282000 | NM_014717       | intron     | 0       | Hs.378901 | ZNF536   |
| rs7305447  | 12 | 17097477  | 0.2491 | 95.09% | 0.103500 | 0.271600 | 0.03807000 | 0.10230000 | NM_001001395    | upstream   | 445186  | Hs.504908 | LMO3     |
| rs10508993 | 10 | 54712286  | 0.3358 | 96.14% | 0.278900 | 1.000000 | 0.03809000 | 0.15010000 | ENST00000387222 | upstream   | 175668  | ---       | ---      |
| rs1441185  | 1  | 162052120 | 0.4275 | 96.84% | 1.000000 | 1.000000 | 0.03810000 | 0.08310000 | ENST00000385701 | upstream   | 107411  | ---       | ---      |
| rs2378282  | 1  | 217892389 | 0.0573 | 97.89% | 0.220800 | 0.227400 | 0.03810000 | 0.05693000 | NM_138794       | downstream | 439559  | Hs.657617 | LYPLAL1  |
| rs2378283  | 1  | 217892524 | 0.0573 | 97.89% | 0.220800 | 0.227400 | 0.03810000 | 0.05693000 | NM_138794       | downstream | 439694  | Hs.657617 | LYPLAL1  |
| rs3802026  | 7  | 90310999  | 0.0573 | 97.89% | 1.000000 | 0.603300 | 0.03810000 | 0.09135000 | NM_012395       | intron     | 0       | Hs.430742 | PFTK1    |
| rs6483496  | 11 | 95675971  | 0.1813 | 95.79% | 0.414600 | 0.140100 | 0.03813000 | 0.05225000 | NM_024725       | downstream | 49618   | Hs.525088 | CCDC82   |
| rs7224319  | 17 | 36410913  | 0.1813 | 95.79% | 1.000000 | 0.380100 | 0.03813000 | 0.37220000 | NM_031959       | upstream   | 1282    | Hs.307026 | KRTAP3-2 |

|            |    |           |        |        |          |          |            |            |                 |            |         |           |          |
|------------|----|-----------|--------|--------|----------|----------|------------|------------|-----------------|------------|---------|-----------|----------|
| rs6547232  | 2  | 79452642  | 0.1182 | 96.49% | 0.778800 | 1.000000 | 0.03814000 | 0.16720000 | NM_138937       | upstream   | 212255  | Hs.567312 | REG3A    |
| rs10491913 | 9  | 9896906   | 0.1531 | 90.53% | 0.151900 | 0.487400 | 0.03816000 | 0.07365000 | ENST00000363183 | downstream | 464554  | ---       | ---      |
| rs10489579 | 1  | 183410344 | 0.3351 | 96.84% | 0.223700 | 0.288200 | 0.03817000 | 0.02510000 | NM_017673       | CDS        | 0       | Hs.134183 | C1orf26  |
| rs10498273 | 14 | 20214639  | 0.0964 | 87.37% | 0.483100 | 0.601700 | 0.03817000 | 0.05629000 | ENST00000386662 | downstream | 379     | ---       | ---      |
| rs6474715  | 9  | 12471436  | 0.3500 | 87.72% | 0.490300 | 0.857600 | 0.03820000 | 0.00334400 | NM_000550       | upstream   | 211999  | Hs.270279 | TYRP1    |
| rs10493176 | 1  | 55311140  | 0.0618 | 93.68% | 0.066640 | 0.068190 | 0.03821000 | 0.07134000 | ENST00000294383 | intron     | 0       | ---       | ---      |
| rs7300261  | 12 | 19760199  | 0.1873 | 93.68% | 0.228400 | 0.008859 | 0.03821000 | 0.00978200 | NM_153207       | downstream | 195775  | Hs.126497 | AEBP2    |
| rs4747989  | 10 | 12630181  | 0.2115 | 88.77% | 0.088280 | 0.141300 | 0.03822000 | 0.03598000 | NM_153498       | intron     | 0       | Hs.659517 | CAMK1D   |
| rs963165   | 8  | 135009559 | 0.3750 | 94.04% | 0.897000 | 0.535200 | 0.03823000 | 0.02314000 | NM_020863       | downstream | 549658  | Hs.446172 | ZFAT1    |
| rs1496555  | 1  | 22241111  | 0.0907 | 67.72% | 0.656600 | 1.000000 | 0.03827000 | 0.12840000 | NM_003036       | intron     | 0       | Hs.705384 | SKI      |
| rs10485102 | 6  | 92385814  | 0.0419 | 71.23% | 1.000000 | 1.000000 | 0.03828000 | 0.07530000 | NM_145333       | upstream   | 1032186 | Hs.644143 | MAP3K7   |
| rs2895570  | 11 | 94102741  | 0.3285 | 97.19% | 0.173500 | 0.591900 | 0.03828000 | 0.05214000 | NM_130847       | upstream   | 38444   | Hs.503594 | AMOTL1   |
| rs479316   | 8  | 103015890 | 0.3388 | 96.84% | 0.419600 | 0.292600 | 0.03828000 | 0.08320000 | NM_032041       | intron     | 0       | Hs.492427 | NCALD    |
| rs4662872  | 2  | 129468207 | 0.1011 | 95.44% | 1.000000 | 0.605300 | 0.03830000 | 0.19810000 | ENST00000375987 | downstream | 248224  | ---       | ---      |
| rs746365   | 5  | 2059779   | 0.2214 | 95.09% | 1.000000 | 0.629800 | 0.03830000 | 0.13800000 | NM_016358       | upstream   | 123899  | Hs.196927 | IRX4     |
| rs10516087 | 5  | 171081602 | 0.2781 | 62.46% | 0.261300 | 0.666100 | 0.03831000 | 0.02132000 | NM_003862       | downstream | 264835  | Hs.87191  | FGF18    |
| rs10515080 | 5  | 67678969  | 0.0057 | 92.28% | 1.000000 | 1.000000 | 0.03832000 | 0.99900000 | NM_181524       | downstream | 45566   | Hs.132225 | PIK3R1   |
| rs1146408  | 1  | 81354461  | 0.1354 | 97.19% | 0.305900 | 0.465200 | 0.03832000 | 0.11080000 | ENST00000388387 | upstream   | 135601  | ---       | ---      |
| rs10505953 | 12 | 24975016  | 0.1360 | 87.72% | 0.001669 | 0.007055 | 0.03833000 | 0.29790000 | NM_005504       | upstream   | 28924   | Hs.438993 | BCAT1    |
| rs10504945 | 8  | 96434663  | 0.0426 | 90.53% | 0.373300 | 0.416600 | 0.03834000 | 0.04074000 | NM_177965       | upstream   | 84069   | Hs.548157 | C8orf37  |
| rs3911569  | 11 | 947335683 | 0.0314 | 95.09% | 0.228100 | 1.000000 | 0.03836000 | 0.09354000 | NM_144665       | upstream   | 131789  | Hs.659934 | SESN3    |
| rs10506555 | 12 | 66195617  | 0.2613 | 93.33% | 0.151300 | 0.268000 | 0.03837000 | 0.07335000 | NM_006482       | upstream   | 133404  | Hs.173135 | DYRK2    |
| rs6716843  | 2  | 16301741  | 0.0899 | 93.68% | 0.454300 | 1.000000 | 0.03837000 | 0.07333000 | ENST00000388035 | downstream | 57696   | ---       | ---      |
| rs10512184 | 9  | 89183421  | 0.0484 | 97.89% | 0.125200 | 0.173500 | 0.03840000 | 0.00165900 | NM_004938       | upstream   | 118542  | Hs.380277 | DAPK1    |
| rs6595716  | 5  | 125871789 | 0.3244 | 97.89% | 0.132800 | 0.589000 | 0.03840000 | 0.02450000 | NM_023927       | downstream | 13844   | Hs.363558 | GRAMD3   |
| rs2045704  | 11 | 26375998  | 0.0236 | 96.84% | 1.000000 | 1.000000 | 0.03841000 | 0.06811000 | NM_031418       | intron     | 0       | Hs.91791  | TMEM16C  |
| rs2827016  | 21 | 22054808  | 0.2575 | 94.04% | 1.000000 | 0.671900 | 0.03841000 | 0.09860000 | ENST00000358903 | downstream | 116335  | ---       | ---      |
| rs2211984  | 21 | 16923481  | 0.1450 | 91.93% | 0.619200 | 1.000000 | 0.03842000 | 0.11820000 | NM_001005734    | downstream | 22068   | Hs.473394 | C21orf34 |
| rs10490518 | 2  | 31164857  | 0.3798 | 91.93% | 0.018000 | 0.233400 | 0.03844000 | 0.09433000 | NM_024572       | intron     | 0       | Hs.468058 | GALNT14  |
| rs10509012 | 10 | 55796840  | 0.1056 | 94.74% | 0.749600 | 1.000000 | 0.03845000 | 0.01356000 | NM_033056       | intron     | 0       | Hs.672170 | PCDH15   |
| rs10490121 | 2  | 48985285  | 0.0743 | 94.39% | 0.645900 | 0.435500 | 0.03846000 | 0.03349000 | NM_181446       | downstream | 57871   | Hs.1428   | FSHR     |
| rs10492606 | 13 | 31281225  | 0.1798 | 88.77% | 0.052220 | 0.072280 | 0.03846000 | 0.18050000 | NM_130806       | downstream | 6216    | Hs.680763 | RXFP2    |
| rs584197   | 6  | 124842312 | 0.2464 | 96.14% | 0.514400 | 0.452200 | 0.03846000 | 0.00570700 | NM_001040214    | intron     | 0       | Hs.656604 | NKAIN2   |
| rs10509345 | 10 | 75031309  | 0.0233 | 97.89% | 1.000000 | 1.000000 | 0.03847000 | 0.99770000 | NM_021245       | downstream | 30109   | Hs.238756 | MYOZ1    |
| rs2462465  | 10 | 57668426  | 0.1350 | 96.14% | 0.603300 | 1.000000 | 0.03847000 | 0.10710000 | NM_001005414    | downstream | 118569  | ---       | ZWINT    |
| rs10491791 | 9  | 81286014  | 0.1236 | 95.09% | 0.152000 | 0.692700 | 0.03848000 | 0.03404000 | NM_007005       | upstream   | 90684   | Hs.444213 | TLE4     |
| rs7599374  | 2  | 167634200 | 0.1236 | 95.09% | 0.267000 | 1.000000 | 0.03848000 | 0.06469000 | ENST00000328983 | intron     | 0       | ---       | ---      |
| rs10491915 | 9  | 9875376   | 0.0394 | 97.89% | 1.000000 | 1.000000 | 0.03850000 | 0.11680000 | ENST00000363183 | downstream | 443024  | ---       | ---      |
| rs6703370  | 1  | 192552316 | 0.0394 | 97.89% | 0.349900 | 0.395800 | 0.03850000 | 0.09976000 | ENST00000385495 | downstream | 171540  | ---       | ---      |
| rs1194670  | 10 | 53818050  | 0.4199 | 89.82% | 0.444600 | 0.520100 | 0.03853000 | 0.08539000 | NM_012242       | downstream | 70627   | Hs.40499  | DKK1     |
| rs10490937 | 10 | 42406998  | 0.0104 | 84.21% | 1.000000 | 1.000000 | 0.03858000 | 0.25100000 | NM_006955       | 3UTR       | 0       | Hs.499453 | ZNF33B   |
| rs10517371 | 4  | 36008688  | 0.2283 | 92.98% | 0.000190 | 0.056060 | 0.03858000 | 0.03906000 | ENST00000357504 | intron     | 0       | ---       | ---      |
| rs9312226  | 4  | 169008205 | 0.0310 | 96.14% | 0.225800 | 0.270200 | 0.03862000 | 0.11200000 | NM_007193       | upstream   | 242105  | Hs.188401 | ANXA10   |
| rs10487175 | 7  | 103360382 | 0.0968 | 88.77% | 0.485200 | 0.703000 | 0.03865000 | 0.07400000 | NM_173054       | intron     | 0       | Hs.655654 | RELN     |
| rs360377   | 2  | 126836315 | 0.0760 | 92.28% | 0.650300 | 0.643600 | 0.03865000 | 0.12230000 | NM_016815       | upstream   | 328229  | Hs.59138  | GYPC     |
| rs10491094 | 17 | 10151479  | 0.1102 | 89.12% | 1.000000 | 0.610000 | 0.03866000 | 0.00280700 | NM_003802       | intron     | 0       | Hs.440895 | MYH13    |
| rs10510757 | 3  | 51385104  | 0.2446 | 96.84% | 1.000000 | 1.000000 | 0.03868000 | 0.13260000 | NM_004947       | intron     | 0       | Hs.476284 | DOCK3    |
| rs2209511  | 13 | 18600686  | 0.3364 | 96.49% | 0.420700 | 0.859800 | 0.03868000 | 0.08776000 | ENST00000343741 | downstream | 8873    | ---       | ---      |
| rs4402440  | 13 | 80698201  | 0.4023 | 91.58% | 1.000000 | 0.534000 | 0.03871000 | 0.01552000 | ENST00000387380 | upstream   | 39682   | ---       | ---      |
| rs3011399  | 10 | 122491477 | 0.1642 | 94.04% | 0.381000 | 0.329300 | 0.03872000 | 0.05352000 | ENST00000369065 | intron     | 0       | ---       | ---      |
| rs10485909 | 7  | 78077684  | 0.0397 | 97.19% | 0.352000 | 1.000000 | 0.03873000 | 0.07080000 | NM_012301       | intron     | 0       | Hs.654788 | MAGI2    |
| rs354167   | 1  | 49443637  | 0.3357 | 97.19% | 1.000000 | 1.000000 | 0.03874000 | 0.11130000 | ENST00000371836 | intron     | 0       | ---       | ---      |
| rs10484894 | 6  | 33590032  | 0.0512 | 75.44% | 0.432100 | 0.127700 | 0.03876000 | 0.02702000 | NM_152735       | downstream | 56733   | Hs.591805 | ZBTB9    |
| rs9290776  | 3  | 185080692 | 0.4683 | 94.04% | 0.049410 | 0.222000 | 0.03876000 | 0.12240000 | NM_001037639    | intron     | 0       | Hs.478469 | PARL     |

|            |    |           |        |        |          |          |            |            |                 |            |        |           |          |
|------------|----|-----------|--------|--------|----------|----------|------------|------------|-----------------|------------|--------|-----------|----------|
| rs7966096  | 12 | 13268178  | 0.2153 | 96.14% | 0.859700 | 1.000000 | 0.03878000 | 0.02606000 | NM_001423       | downstream | 7207   | Hs.705477 | EMP1     |
| rs10513597 | 3  | 164180162 | 0.0717 | 97.89% | 0.376600 | 0.367000 | 0.03879000 | 0.00850000 | ENST00000365009 | downstream | 490525 | ---       | ---      |
| rs915877   | 21 | 44327272  | 0.0717 | 97.89% | 1.000000 | 1.000000 | 0.03879000 | 0.01672000 | NM_003274       | CDS        | 0      | Hs.126221 | TMEM1    |
| rs10505965 | 12 | 25614865  | 0.0532 | 92.28% | 1.000000 | 1.000000 | 0.03880000 | 0.02818000 | NM_152590       | upstream   | 17420  | Hs.44647  | IFLTD1   |
| rs2287686  | 5  | 115859229 | 0.2293 | 93.33% | 1.000000 | 1.000000 | 0.03880000 | 0.01965000 | NM_020796       | intron     | 0      | Hs.156967 | SEMA6A   |
| rs7770496  | 6  | 156756476 | 0.3067 | 94.39% | 0.886000 | 1.000000 | 0.03880000 | 0.00891500 | ENST00000385709 | downstream | 14829  | ---       | ---      |
| rs224940   | 5  | 81752818  | 0.4485 | 95.44% | 0.461900 | 0.361900 | 0.03881000 | 0.03953000 | NM_001039779    | downstream | 34727  | ---       | FLJ41309 |
| rs1021261  | 11 | 24698333  | 0.3699 | 94.39% | 0.600800 | 0.876300 | 0.03882000 | 0.15080000 | NM_001009909    | intron     | 0      | Hs.144138 | LUZP2    |
| rs10518529 | 4  | 129279663 | 0.2410 | 97.54% | 0.745000 | 0.704100 | 0.03882000 | 0.26830000 | NM_032239       | intron     | 0      | Hs.657067 | LARP2    |
| rs7698500  | 4  | 73279543  | 0.2106 | 89.12% | 0.184300 | 0.439800 | 0.03882000 | 0.08904000 | NM_053036       | downstream | 46901  | Hs.99231  | NPFFR2   |
| rs10506985 | 12 | 89236173  | 0.2076 | 97.19% | 0.143900 | 0.400300 | 0.03883000 | 0.06326000 | ENST00000388111 | downstream | 591243 | ---       | ---      |
| rs678038   | 9  | 22697594  | 0.2428 | 96.84% | 0.412000 | 1.000000 | 0.03885000 | 0.10560000 | NM_022160       | downstream | 255122 | Hs.371976 | DMRTA1   |
| rs6724282  | 2  | 24847176  | 0.0520 | 94.39% | 0.523300 | 0.204200 | 0.03886000 | 0.08853000 | NM_147233       | downstream | 101    | Hs.699183 | NCOA1    |
| rs3213732  | 2  | 102364711 | 0.4291 | 96.49% | 0.084340 | 0.129000 | 0.03888000 | 0.31340000 | NM_003855       | intron     | 0      | Hs.469521 | IL18R1   |
| rs590599   | 6  | 153161845 | 0.1382 | 96.49% | 0.798700 | 0.260800 | 0.03888000 | 0.01668000 | NM_194435       | downstream | 39252  | Hs.53973  | VIP      |
| rs10505613 | 8  | 134855058 | 0.1464 | 92.28% | 0.043940 | 0.073670 | 0.03889000 | 0.07002000 | NM_020863       | downstream | 704159 | Hs.446172 | ZFAT1    |
| rs10514753 | 3  | 111616274 | 0.0399 | 96.84% | 0.353100 | 1.000000 | 0.03889000 | 0.22240000 | ENST00000388702 | downstream | 137134 | ---       | ---      |
| rs2173482  | 1  | 211733512 | 0.4083 | 97.54% | 0.457200 | 1.000000 | 0.03889000 | 0.02842000 | ENST00000331583 | upstream   | 64470  | ---       | ---      |
| rs10489332 | 1  | 173217691 | 0.0699 | 97.89% | 0.034130 | 0.028870 | 0.03890000 | 0.27660000 | ENST00000347255 | intron     | 0      | ---       | ---      |
| rs3758697  | 11 | 100215104 | 0.0730 | 96.14% | 0.642600 | 0.636000 | 0.03891000 | 0.02301000 | ENST00000363177 | upstream   | 467    | ---       | ---      |
| rs4570109  | 8  | 82168194  | 0.4104 | 97.89% | 0.710500 | 0.634400 | 0.03891000 | 0.01689000 | NM_018440       | intron     | 0      | Hs.266175 | PAG1     |
| rs3772812  | 3  | 125966523 | 0.2778 | 97.89% | 0.025940 | 0.013960 | 0.03892000 | 0.02731000 | NM_002213       | intron     | 0      | Hs.536663 | ITGB5    |
| rs10516467 | 4  | 101820125 | 0.3370 | 96.84% | 0.345700 | 0.201400 | 0.03893000 | 0.07668000 | NM_016242       | upstream   | 161923 | Hs.152913 | EMCN     |
| rs1360841  | 6  | 79939428  | 0.0625 | 92.63% | 1.000000 | 1.000000 | 0.03893000 | 0.01924000 | NM_138730       | downstream | 28257  | Hs.77558  | HMG3     |
| rs3902839  | 1  | 216355561 | 0.3041 | 85.96% | 0.000001 | 0.000002 | 0.03893000 | 0.15640000 | NM_138796       | downstream | 243900 | Hs.171130 | SPATA17  |
| rs2199219  | 4  | 62866363  | 0.1523 | 89.82% | 0.053510 | 0.420800 | 0.03896000 | 0.05632000 | ENST00000273844 | upstream   | 212001 | ---       | ---      |
| rs4695256  | 4  | 47309657  | 0.3309 | 97.54% | 1.000000 | 0.331400 | 0.03896000 | 0.03220000 | NM_006587       | intron     | 0      | Hs.518618 | CORIN    |
| rs7328333  | 13 | 80236724  | 0.1810 | 97.89% | 0.423000 | 0.499700 | 0.03897000 | 0.17850000 | ENST00000365528 | upstream   | 395054 | ---       | ---      |
| rs2204134  | 7  | 54586758  | 0.2850 | 75.09% | 0.000009 | 0.000096 | 0.03898000 | 0.13290000 | NM_182546       | 3UTR       | 0      | Hs.335933 | VSTM2A   |
| rs7649500  | 3  | 146739486 | 0.1679 | 94.04% | 0.380200 | 0.535700 | 0.03898000 | 0.08856000 | ENST00000356397 | upstream   | 525562 | ---       | ---      |
| rs2291386  | 6  | 159104495 | 0.0315 | 94.74% | 0.228800 | 1.000000 | 0.03899000 | 0.04231000 | NM_001009991    | CDS        | 0      | Hs.436977 | SYTL3    |
| rs710518   | 3  | 190242432 | 0.0315 | 94.74% | 1.000000 | 1.000000 | 0.03899000 | 0.07391000 | NM_005578       | downstream | 167471 | Hs.444362 | LPP      |
| rs6814821  | 4  | 170394672 | 0.0813 | 88.42% | 0.214900 | 0.017540 | 0.03900000 | 0.05408000 | NM_020870       | intron     | 0      | Hs.301804 | SH3RF1   |
| rs1955557  | 14 | 39820852  | 0.2097 | 97.89% | 0.006579 | 0.060560 | 0.03902000 | 0.17260000 | NM_203301       | upstream   | 849481 | Hs.324342 | FBXO33   |
| rs7592580  | 2  | 27974694  | 0.3327 | 97.54% | 0.787000 | 0.859100 | 0.03905000 | 0.05798000 | NM_199192       | intron     | 0      | Hs.258314 | BRE      |
| rs2120524  | 6  | 81802454  | 0.4346 | 91.23% | 0.376600 | 0.874500 | 0.03908000 | 0.05008000 | NM_000056       | downstream | 689764 | Hs.654441 | BCKDHB   |
| rs382379   | 4  | 2776707   | 0.4234 | 96.14% | 1.000000 | 0.878700 | 0.03908000 | 0.08792000 | ENST00000356331 | intron     | 0      | ---       | ---      |
| rs1430235  | 2  | 221931811 | 0.3078 | 94.04% | 0.251800 | 0.257400 | 0.03909000 | 0.04760000 | NM_004438       | downstream | 59182  | Hs.371218 | EPHA4    |
| rs191692   | 2  | 60315082  | 0.3189 | 92.98% | 0.671700 | 0.712700 | 0.03910000 | 0.00657700 | ENST00000363937 | upstream   | 150162 | ---       | ---      |
| rs3924594  | 12 | 73969063  | 0.3189 | 92.98% | 0.322300 | 0.460900 | 0.03910000 | 0.02638000 | NM_032606       | intron     | 0      | Hs.407154 | CAPS2    |
| rs10493096 | 1  | 42097709  | 0.2241 | 94.74% | 0.726200 | 0.112800 | 0.03911000 | 0.07192000 | NM_024503       | intron     | 0      | Hs.591503 | HIVEP3   |
| rs6728771  | 2  | 201700652 | 0.2281 | 92.28% | 0.603300 | 0.544900 | 0.03911000 | 0.05833000 | NM_003879       | intron     | 0      | Hs.390736 | CFLAR    |
| rs3731348  | 7  | 92091169  | 0.0412 | 93.68% | 1.000000 | 1.000000 | 0.03912000 | 0.10230000 | NM_001259       | intron     | 0      | Hs.119882 | CDK6     |
| rs952793   | 20 | 6918831   | 0.1178 | 96.84% | 0.778000 | 0.662700 | 0.03912000 | 0.00825700 | NM_001200       | downstream | 209904 | Hs.73853  | BMP2     |
| rs1413213  | 1  | 240872523 | 0.4137 | 97.54% | 0.712100 | 0.880100 | 0.03913000 | 0.01591000 | NM_152666       | upstream   | 117902 | Hs.672452 | PLD5     |
| rs7797684  | 7  | 3940681   | 0.0056 | 94.74% | 1.000000 | 1.000000 | 0.03914000 | 0.99900000 | NM_152744       | intron     | 0      | Hs.655699 | SDK1     |
| rs10500108 | 7  | 124779737 | 0.1926 | 85.61% | 0.060800 | 0.165400 | 0.03915000 | 0.15010000 | NM_001042594    | upstream   | 422627 | Hs.31968  | POT1     |
| rs1433114  | 19 | 34206067  | 0.1606 | 96.14% | 1.000000 | 1.000000 | 0.03915000 | 0.27370000 | NM_006003       | downstream | 183940 | Hs.170107 | UQCRCF1  |
| rs7148692  | 14 | 39577732  | 0.0644 | 92.63% | 0.609800 | 0.605500 | 0.03915000 | 0.02522000 | NM_203301       | upstream   | 606361 | Hs.324342 | FBXO33   |
| rs1007212  | 15 | 97101441  | 0.4023 | 93.33% | 0.371800 | 0.199700 | 0.03916000 | 0.02396000 | NM_000875       | intron     | 0      | Hs.698330 | IGF1R    |
| rs9298952  | 9  | 3358781   | 0.0637 | 93.68% | 0.609600 | 0.605300 | 0.03916000 | 0.04859000 | NM_134428       | intron     | 0      | Hs.136829 | RFK3     |
| rs576266   | 11 | 115993343 | 0.1372 | 97.19% | 0.442100 | 0.260000 | 0.03918000 | 0.03754000 | NM_032725       | downstream | 130753 | Hs.437341 | BUD13    |
| rs10501480 | 11 | 80209157  | 0.2611 | 94.74% | 0.114000 | 0.202100 | 0.03919000 | 0.10010000 | ENST00000363276 | downstream | 292399 | ---       | ---      |
| rs762147   | 21 | 38160480  | 0.1966 | 93.68% | 0.559900 | 0.519700 | 0.03919000 | 0.05944000 | NM_002240       | upstream   | 136918 | Hs.658533 | KCNJ6    |

|            |    |           |        |        |          |          |            |            |                 |            |        |           |          |
|------------|----|-----------|--------|--------|----------|----------|------------|------------|-----------------|------------|--------|-----------|----------|
| rs4698818  | 4  | 111390394 | 0.4221 | 96.84% | 0.266300 | 0.293200 | 0.03920000 | 0.03438000 | NM_024090       | upstream   | 51174  | Hs.412939 | ELOVL6   |
| rs10515324 | 5  | 101649839 | 0.1439 | 95.09% | 0.805900 | 1.000000 | 0.03921000 | 0.02282000 | NM_180991       | intron     | 0      | Hs.127648 | SLCO4C1  |
| rs10506524 | 12 | 64070379  | 0.0517 | 95.09% | 1.000000 | 1.000000 | 0.03924000 | 0.05682000 | NM_001031679    | intron     | 0      | Hs.339024 | MSRB3    |
| rs10510528 | 3  | 22455267  | 0.0059 | 89.47% | 0.005894 | 1.000000 | 0.03926000 | 0.99870000 | ENST00000255320 | intron     | 0      | ---       | ---      |
| rs10499349 | 7  | 9212088   | 0.4536 | 83.16% | 0.793200 | 0.750900 | 0.03927000 | 0.05875000 | NM_152745       | downstream | 454164 | Hs.487564 | NXP1     |
| rs10514542 | 16 | 81115185  | 0.1594 | 96.84% | 0.653100 | 0.616900 | 0.03928000 | 0.01651000 | NM_001257       | upstream   | 334275 | Hs.654386 | CDH13    |
| rs2389016  | 1  | 80571917  | 0.2251 | 95.09% | 1.000000 | 0.429500 | 0.03929000 | 0.08207000 | ENST00000388387 | upstream   | 918145 | ---       | ---      |
| rs6748166  | 2  | 170498527 | 0.4087 | 92.28% | 0.445000 | 1.000000 | 0.03930000 | 0.11590000 | NM_172070       | intron     | 0      | ---       | UBR3     |
| rs9305856  | 21 | 18529414  | 0.0904 | 95.09% | 0.250800 | 0.233500 | 0.03931000 | 0.01967000 | NM_024944       | upstream   | 9607   | Hs.283725 | CHODL    |
| rs10507470 | 13 | 37828100  | 0.0246 | 92.63% | 1.000000 | 1.000000 | 0.03932000 | 0.09120000 | NM_016617       | intron     | 0      | Hs.643655 | UFM1     |
| rs1882027  | 1  | 30885819  | 0.1279 | 91.93% | 0.158500 | 0.094170 | 0.03932000 | 0.12040000 | NM_002379       | downstream | 72764  | Hs.150366 | MATN1    |
| rs204434   | 22 | 33124787  | 0.4309 | 96.49% | 0.221000 | 0.115500 | 0.03932000 | 0.02630000 | NM_133642       | upstream   | 478461 | Hs.474667 | LARGE    |
| rs10504736 | 8  | 82269581  | 0.2259 | 94.74% | 0.035930 | 0.342200 | 0.03933000 | 0.05586000 | NM_018440       | upstream   | 82723  | Hs.266175 | PAG1     |
| rs605781   | 21 | 43558435  | 0.1193 | 85.26% | 0.010380 | 0.004398 | 0.03934000 | 0.06765000 | NM_000394       | downstream | 92453  | Hs.184085 | CRYAA    |
| rs7231714  | 18 | 59725580  | 0.3839 | 93.68% | 0.897100 | 0.506500 | 0.03934000 | 0.10090000 | NM_002575       | downstream | 3480   | Hs.594481 | SERPINB2 |
| rs10493133 | 1  | 48813681  | 0.1349 | 97.54% | 0.797500 | 1.000000 | 0.03935000 | 0.04119000 | ENST00000371839 | intron     | 0      | ---       | ---      |
| rs9315797  | 13 | 40453352  | 0.1349 | 97.54% | 0.065520 | 0.047700 | 0.03935000 | 0.04754000 | NM_172373       | intron     | 0      | Hs.135646 | ELF1     |
| rs10493895 | 1  | 98043814  | 0.1588 | 97.19% | 0.073330 | 0.132800 | 0.03937000 | 0.03654000 | NM_000110       | intron     | 0      | Hs.335034 | DPYD     |
| rs10495723 | 2  | 21910766  | 0.3722 | 94.74% | 0.241700 | 0.061120 | 0.03937000 | 0.01624000 | ENST00000383859 | upstream   | 88604  | ---       | ---      |
| rs6857229  | 4  | 76710592  | 0.1588 | 97.19% | 0.367700 | 0.615700 | 0.03937000 | 0.04338000 | NM_178497       | downstream | 487    | Hs.24510  | C4orf26  |
| rs10484177 | 14 | 43966684  | 0.4505 | 95.79% | 0.393000 | 0.088070 | 0.03938000 | 0.10830000 | NM_032135       | downstream | 76779  | Hs.307086 | FSCB     |
| rs10501935 | 11 | 99317183  | 0.1437 | 94.04% | 0.004330 | 0.018000 | 0.03938000 | 0.01454000 | NM_175566       | intron     | 0      | Hs.656783 | CNTN5    |
| rs605954   | 11 | 74258861  | 0.1992 | 93.33% | 0.338800 | 0.426000 | 0.03938000 | 0.00403900 | ENST00000321448 | intron     | 0      | ---       | ---      |
| rs10488398 | 7  | 135214873 | 0.0410 | 94.04% | 0.361800 | 0.401300 | 0.03939000 | 0.04120000 | NM_145808       | downstream | 47178  | Hs.654894 | MTPN     |
| rs10518349 | 1  | 71024526  | 0.0907 | 94.74% | 0.466700 | 1.000000 | 0.03939000 | 0.05245000 | NM_198719       | downstream | 184526 | Hs.445000 | PTGER3   |
| rs10508433 | 10 | 11909527  | 0.1203 | 83.16% | 0.544800 | 0.740700 | 0.03940000 | 0.02831000 | NM_153256       | intron     | 0      | Hs.435775 | C10orf47 |
| rs10515938 | 2  | 171098475 | 0.1828 | 97.89% | 0.426900 | 1.000000 | 0.03942000 | 0.02181000 | NM_138995       | intron     | 0      | Hs.671900 | MYO3B    |
| rs941725   | 14 | 102181576 | 0.0911 | 94.39% | 0.143300 | 1.000000 | 0.03943000 | 0.08293000 | NM_015156       | intron     | 0      | Hs.510521 | RCOR1    |
| rs902523   | 5  | 77251993  | 0.1612 | 95.79% | 0.500500 | 0.803000 | 0.03944000 | 0.00445600 | NM_003664       | downstream | 80112  | Hs.532091 | AP3B1    |
| rs1983085  | 3  | 15504547  | 0.3116 | 94.04% | 0.776600 | 0.867800 | 0.03945000 | 0.27530000 | NM_005677       | intron     | 0      | Hs.146735 | COLQ     |
| rs4263839  | 9  | 116606261 | 0.2264 | 92.98% | 0.077410 | 0.231100 | 0.03945000 | 0.13970000 | NM_005118       | intron     | 0      | Hs.241382 | TNFSF15  |
| rs10508263 | 10 | 3775605   | 0.0616 | 94.04% | 0.258200 | 0.265000 | 0.03946000 | 0.15590000 | NM_001300       | downstream | 32583  | Hs.4055   | KLF6     |
| rs1951537  | 14 | 28630572  | 0.1019 | 94.74% | 0.745400 | 0.720700 | 0.03946000 | 0.08638000 | ENST00000386746 | upstream   | 109205 | ---       | ---      |
| rs9304469  | 18 | 20423422  | 0.0659 | 90.53% | 0.084600 | 0.086370 | 0.03946000 | 0.01905000 | NM_021624       | downstream | 111855 | Hs.287388 | HRH4     |
| rs10505062 | 8  | 105663612 | 0.0627 | 95.09% | 0.075020 | 0.077070 | 0.03947000 | 0.04005000 | NM_013437       | intron     | 0      | Hs.654804 | LRP12    |
| rs3917289  | 2  | 102148343 | 0.0639 | 93.33% | 0.285400 | 0.295800 | 0.03949000 | 0.02259000 | NM_000877       | intron     | 0      | Hs.701982 | ILIR1    |
| rs1501845  | 5  | 61012367  | 0.1250 | 94.04% | 0.778600 | 0.222100 | 0.03950000 | 0.01820000 | NM_173667       | upstream   | 6099   | Hs.683866 | FLJ37543 |
| rs4980171  | 10 | 124733190 | 0.4209 | 97.54% | 0.109300 | 0.343000 | 0.03951000 | 0.02839000 | NM_153336       | intron     | 0      | Hs.281004 | PSTK     |
| rs342239   | 7  | 106124138 | 0.3704 | 94.74% | 0.009284 | 0.240200 | 0.03952000 | 0.12160000 | NM_002649       | upstream   | 168839 | Hs.32942  | PIK3CG   |
| rs756452   | 5  | 85703889  | 0.2130 | 97.19% | 0.719900 | 1.000000 | 0.03952000 | 0.01111000 | NM_001867       | upstream   | 245588 | Hs.430075 | COX7C    |
| rs10483708 | 14 | 58478842  | 0.2274 | 93.33% | 0.079540 | 0.339000 | 0.03953000 | 0.01330000 | NM_014992       | upstream   | 246310 | Hs.654934 | DAAM1    |
| rs10489580 | 1  | 183408955 | 0.3412 | 97.19% | 0.109800 | 0.218400 | 0.03953000 | 0.01758000 | NM_017673       | intron     | 0      | Hs.134183 | C1orf26  |
| rs735390   | 12 | 87899538  | 0.0637 | 93.68% | 0.609600 | 1.000000 | 0.03953000 | 0.01769000 | ENST00000388095 | downstream | 114892 | ---       | ---      |
| rs9302327  | 15 | 27944249  | 0.2659 | 93.68% | 1.000000 | 0.855500 | 0.03953000 | 0.01140000 | NM_003257       | upstream   | 42239  | Hs.510833 | TJP1     |
| rs28373914 | 13 | 32099966  | 0.3412 | 96.14% | 0.139300 | 0.052330 | 0.03954000 | 0.06027000 | NM_015032       | intron     | 0      | Hs.699308 | PDS5B    |
| rs726863   | 1  | 150666985 | 0.3394 | 97.19% | 0.284100 | 0.078160 | 0.03955000 | 0.12100000 | NM_016190       | upstream   | 13622  | Hs.242057 | CRNN     |
| rs10491874 | 9  | 1251602   | 0.0056 | 94.39% | 1.000000 | 1.000000 | 0.03957000 | 0.99860000 | NM_181872       | downstream | 204050 | Hs.59506  | DMRT2    |
| rs2120021  | 15 | 96719695  | 0.2464 | 96.84% | 1.000000 | 0.661600 | 0.03957000 | 0.00798900 | NM_182562       | downstream | 80688  | Hs.668070 | FLJ39743 |
| rs6869856  | 5  | 166017651 | 0.3302 | 75.44% | 0.090510 | 0.279400 | 0.03958000 | 0.08707000 | ENST00000384798 | downstream | 205147 | ---       | ---      |
| rs1880014  | 8  | 123672654 | 0.4366 | 96.84% | 0.327200 | 0.232300 | 0.03959000 | 0.02528000 | NM_005328       | upstream   | 949843 | Hs.571528 | HAS2     |
| rs1918715  | 8  | 117404580 | 0.0305 | 97.89% | 1.000000 | 1.000000 | 0.03961000 | 0.07206000 | NM_003756       | downstream | 321673 | Hs.492599 | EIF3H    |
| rs212390   | 6  | 159409555 | 0.1293 | 90.88% | 0.401900 | 1.000000 | 0.03962000 | 0.07527000 | NM_138810       | upstream   | 23383  | Hs.529984 | TAGAP    |
| rs4891538  | 18 | 70088232  | 0.1731 | 91.23% | 0.029180 | 0.010680 | 0.03962000 | 0.10840000 | NM_001914       | intron     | 0      | Hs.465413 | CYB5A    |
| rs10504128 | 8  | 52911112  | 0.2678 | 93.68% | 0.029040 | 0.069080 | 0.03963000 | 0.00580300 | ENST00000360540 | intron     | 0      | ---       | ---      |

|            |    |           |        |        |          |          |            |            |                 |            |         |           |          |
|------------|----|-----------|--------|--------|----------|----------|------------|------------|-----------------|------------|---------|-----------|----------|
| rs953528   | 17 | 23092917  | 0.4487 | 82.11% | 0.003808 | 0.002045 | 0.03963000 | 0.21230000 | NM_153292       | downstream | 15005   | ---       | NOS2A    |
| rs17060071 | 13 | 38976326  | 0.0316 | 94.39% | 0.022520 | 0.058970 | 0.03964000 | 0.01018000 | NM_005780       | intron     | 0       | Hs.507798 | LHPF     |
| rs2450287  | 8  | 50992349  | 0.0874 | 94.39% | 0.704100 | 0.549600 | 0.03965000 | 0.06270000 | NM_018967       | upstream   | 476977  | Hs.584914 | SNHG1    |
| rs528633   | 6  | 117755033 | 0.1096 | 91.23% | 1.000000 | 1.000000 | 0.03966000 | 0.17110000 | NM_002944       | intron     | 0       | Hs.1041   | ROS1     |
| rs6487673  | 12 | 28329674  | 0.0409 | 94.39% | 0.360700 | 0.399500 | 0.03970000 | 0.02378000 | NM_018318       | intron     | 0       | Hs.653125 | CCDC91   |
| rs7336772  | 13 | 101917288 | 0.3792 | 94.39% | 0.028170 | 0.404500 | 0.03970000 | 0.04111000 | NM_175929       | upstream   | 65132   | Hs.696392 | FGF14    |
| rs485865   | 7  | 71371987  | 0.1116 | 88.07% | 0.099010 | 0.342400 | 0.03972000 | 0.07108000 | NM_001017440    | intron     | 0       | Hs.592750 | CALN1    |
| rs597741   | 18 | 53355474  | 0.3796 | 67.02% | 0.218400 | 0.098560 | 0.03974000 | 0.02393000 | NM_000140       | downstream | 11061   | Hs.465221 | FECH     |
| rs10515496 | 5  | 137072425 | 0.1155 | 88.07% | 1.000000 | 0.741400 | 0.03975000 | 0.02163000 | NM_017415       | intron     | 0       | Hs.655084 | KLHL3    |
| rs1125930  | 13 | 60210088  | 0.0962 | 91.23% | 1.000000 | 1.000000 | 0.03977000 | 0.10800000 | ENST00000384127 | upstream   | 51607   | ---       | ---      |
| rs10512781 | 5  | 41270400  | 0.3369 | 97.89% | 0.690000 | 0.336800 | 0.03978000 | 0.08609000 | NM_000065       | intron     | 0       | Hs.481992 | C6       |
| rs1073277  | 4  | 36680445  | 0.1222 | 93.33% | 0.777400 | 0.534300 | 0.03978000 | 0.03163000 | ENST00000389006 | upstream   | 354001  | ---       | ---      |
| rs2061459  | 4  | 66751596  | 0.4601 | 96.84% | 0.545500 | 0.879600 | 0.03978000 | 0.03276000 | ENST00000339867 | downstream | 108759  | ---       | ---      |
| rs10493731 | 1  | 83043983  | 0.1444 | 94.74% | 0.806500 | 0.724800 | 0.03979000 | 0.03159000 | NM_012302       | downstream | 813288  | Hs.24212  | LPHN2    |
| rs3736583  | 10 | 124732782 | 0.4211 | 97.89% | 0.111300 | 0.347200 | 0.03981000 | 0.02830000 | NM_153336       | CDS        | 0       | Hs.281004 | PSTK     |
| rs4270120  | 15 | 43723526  | 0.4211 | 97.89% | 0.066080 | 0.059870 | 0.03981000 | 0.07333000 | NM_021199       | intron     | 0       | Hs.511251 | SQRDL    |
| rs679783   | 1  | 49322083  | 0.3345 | 97.54% | 0.892800 | 0.723900 | 0.03982000 | 0.11220000 | ENST00000371836 | intron     | 0       | ---       | ---      |
| rs693014   | 1  | 65525828  | 0.0771 | 65.96% | 0.295600 | 1.000000 | 0.03982000 | 0.29190000 | NM_014787       | intron     | 0       | Hs.647643 | DNAJC6   |
| rs1999334  | 21 | 45494885  | 0.3191 | 90.18% | 0.153800 | 0.056990 | 0.03983000 | 0.03010000 | ENST00000364254 | downstream | 6152    | ---       | ---      |
| rs2402298  | 7  | 117521094 | 0.0489 | 96.84% | 0.487400 | 1.000000 | 0.03983000 | 0.19870000 | NM_016200       | upstream   | 90361   | Hs.657737 | LSM8     |
| rs2133516  | 4  | 30822103  | 0.0996 | 84.56% | 1.000000 | 1.000000 | 0.03984000 | 0.03885000 | NM_032457       | downstream | 68534   | Hs.570785 | PCDH7    |
| rs2827114  | 21 | 22205437  | 0.2100 | 70.18% | 0.000204 | 0.000645 | 0.03984000 | 0.07616000 | ENST00000333482 | upstream   | 198221  | ---       | ---      |
| rs10515507 | 5  | 138694271 | 0.2832 | 97.89% | 1.000000 | 0.728100 | 0.03986000 | 0.11460000 | NM_018834       | downstream | 244     | Hs.268939 | MATR3    |
| rs726206   | 12 | 16541935  | 0.4247 | 97.89% | 0.270300 | 0.654000 | 0.03986000 | 0.12310000 | NM_001001395    | downstream | 50639   | Hs.504908 | LMO3     |
| rs10513200 | 3  | 144611488 | 0.2196 | 95.09% | 0.594600 | 1.000000 | 0.03987000 | 0.20850000 | NM_173653       | intron     | 0       | Hs.302257 | SLC9A9   |
| rs666214   | 2  | 45741435  | 0.1558 | 91.23% | 0.015310 | 0.187200 | 0.03989000 | 0.04854000 | NM_005400       | intron     | 0       | Hs.580351 | PRKE     |
| rs10487416 | 7  | 119528279 | 0.0179 | 97.89% | 1.000000 | 1.000000 | 0.03991000 | 0.18940000 | ENST00000350695 | upstream   | 94888   | ---       | ---      |
| rs825064   | 12 | 100541701 | 0.0714 | 85.96% | 0.110700 | 0.361800 | 0.03991000 | 0.09460000 | NM_206821       | intron     | 0       | Hs.654589 | MYBPC1   |
| rs985788   | 2  | 167205127 | 0.0179 | 97.89% | 1.000000 | 1.000000 | 0.03991000 | 0.08815000 | NM_002976       | upstream   | 153400  | Hs.695947 | SCN7A    |
| rs10484629 | 6  | 133159563 | 0.0733 | 81.40% | 1.000000 | 1.000000 | 0.03992000 | 0.05036000 | NM_052831       | intron     | 0       | Hs.347144 | C6orf192 |
| rs1356300  | 4  | 153604919 | 0.3895 | 93.68% | 0.248400 | 0.410400 | 0.03992000 | 0.00853300 | NM_033632       | intron     | 0       | Hs.696040 | FBXW7    |
| rs1543673  | 9  | 28417231  | 0.4618 | 96.49% | 0.808200 | 0.654600 | 0.03992000 | 0.01730000 | NM_152570       | intron     | 0       | Hs.699432 | LINGO2   |
| rs10513328 | 9  | 120113841 | 0.4075 | 92.98% | 1.000000 | 0.646000 | 0.03994000 | 0.08117000 | NM_014618       | downstream | 854888  | Hs.532316 | DBC1     |
| rs1732474  | 12 | 126013813 | 0.0193 | 90.88% | 0.084700 | 1.000000 | 0.03996000 | 0.07089000 | ENST00000364482 | upstream   | 49896   | ---       | ---      |
| rs4128982  | 8  | 131966264 | 0.2035 | 90.53% | 0.568800 | 0.382000 | 0.03997000 | 0.01052000 | NM_001115       | intron     | 0       | Hs.591859 | ADCY8    |
| rs10520462 | 4  | 182262097 | 0.1468 | 94.39% | 0.811700 | 1.000000 | 0.03998000 | 0.02878000 | ENST00000378957 | upstream   | 418710  | ---       | ---      |
| rs10491652 | 9  | 5099531   | 0.0055 | 95.09% | 1.000000 | 1.000000 | 0.03999000 | 0.99870000 | NM_004972       | intron     | 0       | Hs.656213 | JAK2     |
| rs10500155 | 7  | 145063916 | 0.0782 | 91.93% | 1.000000 | 1.000000 | 0.03999000 | 0.02162000 | ENST00000385572 | upstream   | 261438  | ---       | ---      |
| rs10501112 | 11 | 29165022  | 0.0055 | 95.09% | 1.000000 | 1.000000 | 0.03999000 | 0.99880000 | NM_152636       | downstream | 853503  | Hs.243326 | METTS1   |
| rs10502102 | 11 | 107935884 | 0.0055 | 95.09% | 1.000000 | 1.000000 | 0.03999000 | 0.99880000 | NM_015065       | intron     | 0       | Hs.269591 | EXPH5    |
| rs10504320 | 8  | 62090667  | 0.0055 | 95.09% | 1.000000 | 1.000000 | 0.03999000 | 0.99880000 | NM_017780       | downstream | 148650  | Hs.20395  | CHD7     |
| rs10506370 | 12 | 57217919  | 0.0055 | 95.09% | 1.000000 | 1.000000 | 0.03999000 | 0.99880000 | NM_153377       | downstream | 334286  | Hs.253736 | LRIG3    |
| rs10506774 | 12 | 77107229  | 0.0055 | 95.09% | 1.000000 | 1.000000 | 0.03999000 | 0.99870000 | NM_014903       | intron     | 0       | Hs.655301 | NAV3     |
| rs10508510 | 10 | 16422484  | 0.0055 | 95.09% | 1.000000 | 1.000000 | 0.03999000 | 0.99880000 | ENST00000386700 | downstream | 58176   | ---       | ---      |
| rs10514239 | 5  | 81714745  | 0.0055 | 95.09% | 1.000000 | 1.000000 | 0.03999000 | 0.99870000 | NM_001039779    | 5UTR       | 0       | ---       | FLJ41309 |
| rs10517726 | 4  | 161971354 | 0.0055 | 95.09% | 1.000000 | 1.000000 | 0.03999000 | 0.99900000 | NM_020116       | downstream | 553147  | Hs.591707 | FSTL5    |
| rs1372717  | 2  | 106162372 | 0.0055 | 95.09% | 1.000000 | 1.000000 | 0.03999000 | 0.99860000 | NM_025076       | intron     | 0       | Hs.469561 | UXS1     |
| rs1550600  | 4  | 78545318  | 0.0055 | 95.09% | 1.000000 | 1.000000 | 0.03999000 | 0.99880000 | NM_006419       | upstream   | 200680  | Hs.100431 | CXCL13   |
| rs1837872  | 4  | 77429961  | 0.0055 | 95.09% | 1.000000 | 1.000000 | 0.03999000 | 0.99880000 | NM_003943       | upstream   | 16242   | Hs.109590 | STBD1    |
| rs3797364  | 5  | 118877864 | 0.0055 | 95.09% | 1.000000 | 1.000000 | 0.03999000 | 0.99880000 | NM_000414       | intron     | 0       | Hs.406861 | HSD17B4  |
| rs6029893  | 20 | 40018906  | 0.3460 | 96.84% | 1.000000 | 0.861600 | 0.03999000 | 0.06153000 | NM_007050       | downstream | 115900  | Hs.526879 | PTPRT    |
| rs10497111 | 2  | 153147664 | 0.1269 | 92.63% | 0.047500 | 0.092520 | 0.04000000 | 0.05029000 | NM_052905       | intron     | 0       | Hs.654630 | FMNL2    |
| rs10520091 | 15 | 35805776  | 0.0078 | 67.37% | 0.007833 | 1.000000 | 0.04001000 | 0.99880000 | NM_152453       | upstream   | 208973  | Hs.179646 | TMC05    |
| rs1553622  | 1  | 207530483 | 0.2267 | 86.67% | 0.370400 | 0.410200 | 0.04003000 | 0.04252000 | NM_025179       | upstream   | 1046195 | Hs.497626 | PLXNA2   |

|            |    |           |        |        |          |          |            |            |                 |            |         |           |          |
|------------|----|-----------|--------|--------|----------|----------|------------|------------|-----------------|------------|---------|-----------|----------|
| rs3884586  | 1  | 115938348 | 0.0634 | 94.04% | 0.609500 | 0.604700 | 0.04003000 | 0.02320000 | NM_002506       | upstream   | 255968  | Hs.2561   | NGFB     |
| rs1112687  | 1  | 49841291  | 0.3381 | 97.54% | 0.788600 | 0.725800 | 0.04004000 | 0.14580000 | ENST00000371836 | intron     | 0       | ---       | ---      |
| rs2375675  | 1  | 65325781  | 0.1004 | 97.89% | 0.172000 | 0.143000 | 0.04005000 | 0.09395000 | ENST00000362265 | upstream   | 28998   | ---       | ---      |
| rs10236906 | 7  | 18706195  | 0.0942 | 91.23% | 0.142600 | 0.603100 | 0.04007000 | 0.07958000 | NM_178425       | intron     | 0       | Hs.196054 | HDAC9    |
| rs1417315  | 13 | 58408332  | 0.3256 | 75.44% | 0.043450 | 0.145800 | 0.04007000 | 0.03515000 | ENST00000365514 | upstream   | 408446  | ---       | ---      |
| rs1446499  | 2  | 47000878  | 0.1191 | 97.19% | 0.392900 | 0.675000 | 0.04007000 | 0.09179000 | NM_139279       | upstream   | 4425    | Hs.293689 | MCFD2    |
| rs8177130  | 7  | 142269523 | 0.0306 | 97.54% | 1.000000 | 1.000000 | 0.04007000 | 0.08412000 | NM_004445       | upstream   | 1106    | Hs.380089 | EPHB6    |
| rs10509707 | 10 | 98039194  | 0.1380 | 97.89% | 0.622500 | 1.000000 | 0.04008000 | 0.17880000 | NM_001017520    | upstream   | 14881   | Hs.534206 | DNNT     |
| rs10233491 | 7  | 25433046  | 0.2317 | 90.88% | 0.000744 | 0.002228 | 0.04011000 | 0.22900000 | ENST00000365363 | downstream | 162021  | ---       | ---      |
| rs10235122 | 7  | 21192425  | 0.0260 | 87.72% | 0.147900 | 0.189300 | 0.04011000 | 0.05549000 | ENST00000387535 | downstream | 29256   | ---       | ---      |
| rs2008612  | 8  | 101236871 | 0.4363 | 90.88% | 0.801100 | 0.635800 | 0.04011000 | 0.09934000 | NM_005034       | downstream | 1465    | Hs.351475 | POLR2K   |
| rs4889002  | 16 | 78219413  | 0.4176 | 97.89% | 0.139100 | 0.879900 | 0.04011000 | 0.05233000 | NM_001031804    | upstream   | 27301   | Hs.134859 | MAF      |
| rs10493728 | 1  | 82967419  | 0.1588 | 97.19% | 0.652400 | 0.530600 | 0.04013000 | 0.08941000 | NM_012302       | downstream | 736724  | Hs.24212  | LPHN2    |
| rs1055252  | 13 | 25516922  | 0.2330 | 92.63% | 0.604800 | 0.357400 | 0.04013000 | 0.18660000 | NM_001007538    | 3UTR       | 0       | Hs.433791 | TMEM46   |
| rs10485929 | 7  | 78524904  | 0.2115 | 97.89% | 0.590500 | 0.803600 | 0.04014000 | 0.05738000 | NM_012301       | intron     | 0       | Hs.654788 | MAGI2    |
| rs10484527 | 6  | 166964675 | 0.0059 | 89.82% | 1.000000 | 1.000000 | 0.04016000 | 0.99870000 | ENST00000366866 | intron     | 0       | ---       | ---      |
| rs539937   | 4  | 16801724  | 0.4881 | 88.42% | 0.131900 | 0.058630 | 0.04019000 | 0.09904000 | NM_001290       | upstream   | 292299  | Hs.23748  | LDB2     |
| rs10504840 | 8  | 89496115  | 0.1929 | 93.68% | 0.049690 | 0.114700 | 0.04023000 | 0.07808000 | NM_003821       | upstream   | 1343058 | Hs.103755 | RIPK2    |
| rs1943714  | 11 | 84236319  | 0.3202 | 93.68% | 0.888300 | 1.000000 | 0.04023000 | 0.08517000 | ENST00000376104 | intron     | 0       | ---       | ---      |
| rs1392326  | 3  | 169050871 | 0.3387 | 97.89% | 0.062120 | 0.079220 | 0.04024000 | 0.02750000 | NM_005025       | downstream | 24829   | Hs.478153 | SERPINI1 |
| rs2615295  | 15 | 42199890  | 0.1011 | 97.19% | 0.748200 | 1.000000 | 0.04024000 | 0.06276000 | NM_032892       | intron     | 0       | Hs.578544 | FRMD5    |
| rs2078426  | 15 | 52740396  | 0.4863 | 89.47% | 0.380300 | 0.353700 | 0.04025000 | 0.05688000 | NM_016304       | downstream | 520417  | Hs.274772 | C15orf15 |
| rs1831298  | 1  | 90272407  | 0.2657 | 95.09% | 0.640000 | 0.718800 | 0.04026000 | 0.02577000 | NM_181781       | downstream | 5725    | ---       | ZNF326   |
| rs1978797  | 16 | 61814767  | 0.0308 | 96.84% | 1.000000 | 1.000000 | 0.04029000 | 0.08435000 | NM_001797       | downstream | 1723419 | Hs.116471 | CDH11    |
| rs794129   | 6  | 164626098 | 0.0441 | 91.58% | 0.397500 | 0.441400 | 0.04029000 | 0.03894000 | NM_144980       | downstream | 987058  | Hs.144734 | C6orf118 |
| rs9638846  | 7  | 27720217  | 0.3829 | 94.39% | 0.439000 | 0.757400 | 0.04031000 | 0.03386000 | NM_006024       | upstream   | 26116   | Hs.34576  | TAX1BP1  |
| rs10517426 | 4  | 58541512  | 0.0686 | 89.47% | 0.100700 | 0.341300 | 0.04033000 | 0.03015000 | ENST00000387903 | upstream   | 488216  | ---       | ---      |
| rs1985065  | 4  | 165421869 | 0.3866 | 94.39% | 0.520100 | 0.537900 | 0.04033000 | 0.00806900 | NM_012403       | upstream   | 83556   | Hs.661161 | ANP32C   |
| rs10504873 | 8  | 90138115  | 0.0630 | 94.74% | 1.000000 | 0.303000 | 0.04034000 | 0.17470000 | NM_003821       | upstream   | 701058  | Hs.103755 | RIPK2    |
| rs10510108 | 10 | 124086150 | 0.0756 | 95.09% | 0.378900 | 0.368600 | 0.04034000 | 0.09543000 | NM_144587       | CDS        | 0       | Hs.422466 | BTBD16   |
| rs10514974 | 5  | 63879671  | 0.3302 | 91.93% | 0.676700 | 0.854800 | 0.04034000 | 0.03578000 | NM_001029875    | intron     | 0       | Hs.657133 | RG57BP   |
| rs6967565  | 7  | 8096253   | 0.3868 | 92.98% | 0.604200 | 0.248900 | 0.04037000 | 0.01814000 | NM_138426       | downstream | 2760    | Hs.131673 | GLCCI1   |
| rs728539   | 7  | 30614576  | 0.1400 | 96.49% | 0.448800 | 0.259900 | 0.04037000 | 0.24530000 | NM_002047       | intron     | 0       | Hs.404321 | GARS     |
| rs2184719  | 10 | 56193061  | 0.1022 | 97.89% | 1.000000 | 0.732700 | 0.04038000 | 0.01780000 | NM_033056       | intron     | 0       | Hs.672170 | PCDH15   |
| rs251506   | 5  | 52549638  | 0.0958 | 91.58% | 0.270400 | 1.000000 | 0.04039000 | 0.02596000 | NM_004531       | upstream   | 108302  | Hs.163645 | MOCS2    |
| rs10505180 | 8  | 113392265 | 0.1458 | 95.09% | 0.014320 | 0.013240 | 0.04040000 | 0.13200000 | NM_052900       | intron     | 0       | Hs.91381  | CSMD3    |
| rs1436302  | 2  | 125890401 | 0.2933 | 89.12% | 0.069010 | 0.070800 | 0.04040000 | 0.00095670 | NM_016815       | upstream   | 1274143 | Hs.59138  | GYPC     |
| rs7146962  | 14 | 53215067  | 0.3190 | 77.54% | 0.440500 | 0.856000 | 0.04041000 | 0.01664000 | NM_130851       | downstream | 271140  | Hs.68879  | BMP4     |
| rs349235   | 4  | 60516353  | 0.4317 | 97.54% | 0.272300 | 0.349900 | 0.04042000 | 0.03864000 | ENST00000364905 | downstream | 133873  | ---       | ---      |
| rs10486577 | 7  | 28100688  | 0.0056 | 94.74% | 1.000000 | 1.000000 | 0.04043000 | 0.99880000 | NM_175061       | intron     | 0       | Hs.368944 | JAZF1    |
| rs10496331 | 2  | 98708387  | 0.0056 | 94.74% | 0.005566 | 1.000000 | 0.04043000 | 0.99850000 | NM_012214       | intron     | 0       | Hs.177576 | MGAT4A   |
| rs10501107 | 11 | 28934521  | 0.0056 | 94.74% | 1.000000 | 1.000000 | 0.04043000 | 0.99880000 | NM_152636       | downstream | 623002  | Hs.243326 | METT5D1  |
| rs10504907 | 8  | 92502885  | 0.0056 | 94.74% | 1.000000 | 1.000000 | 0.04043000 | 0.99880000 | NM_134266       | downstream | 26763   | Hs.354013 | SLC26A7  |
| rs10515483 | 5  | 136168921 | 0.0056 | 94.74% | 1.000000 | 1.000000 | 0.04043000 | 0.99870000 | NM_020389       | upstream   | 447947  | Hs.591263 | TRPC7    |
| rs2410039  | 8  | 13111212  | 0.0056 | 94.74% | 1.000000 | 1.000000 | 0.04043000 | 0.99880000 | NM_182643       | intron     | 0       | Hs.134296 | DLC1     |
| rs352035   | 4  | 75005492  | 0.0056 | 94.74% | 1.000000 | 1.000000 | 0.04043000 | 0.99880000 | NM_002619       | downstream | 60168   | Hs.81564  | PF4      |
| rs811888   | 3  | 119475535 | 0.0056 | 94.74% | 1.000000 | 1.000000 | 0.04043000 | 0.99870000 | NM_001015887    | downstream | 628156  | Hs.112873 | IGSF11   |
| rs2134095  | 1  | 163644176 | 0.3509 | 96.49% | 1.000000 | 0.387300 | 0.04044000 | 0.20530000 | NM_006917       | CDS        | 0       | Hs.26550  | RXRG     |
| rs9285134  | 13 | 38982118  | 0.2140 | 97.54% | 1.000000 | 0.415200 | 0.04045000 | 0.01360000 | NM_005780       | intron     | 0       | Hs.507798 | LHFP     |
| rs9316657  | 13 | 53230159  | 0.3910 | 93.33% | 0.796700 | 0.250400 | 0.04045000 | 0.05320000 | ENST00000387037 | downstream | 499651  | ---       | ---      |
| rs1008427  | 3  | 171733956 | 0.0056 | 93.68% | 1.000000 | 1.000000 | 0.04047000 | 0.99860000 | NM_020949       | intron     | 0       | Hs.674783 | SLC7A14  |
| rs2054069  | 8  | 126708685 | 0.0056 | 93.68% | 1.000000 | 1.000000 | 0.04047000 | 0.99880000 | NM_025195       | downstream | 188861  | Hs.444947 | TRIB1    |
| rs1400061  | 12 | 71960825  | 0.1607 | 97.19% | 0.501800 | 0.803600 | 0.04048000 | 0.08137000 | NM_013381       | downstream | 615137  | Hs.199814 | TRHDE    |
| rs1731545  | 12 | 66295979  | 0.4355 | 97.89% | 0.903200 | 0.437100 | 0.04050000 | 0.27550000 | NM_006482       | upstream   | 33042   | Hs.173135 | DYRK2    |



|            |    |           |        |        |          |          |            |            |                 |            |         |           |           |
|------------|----|-----------|--------|--------|----------|----------|------------|------------|-----------------|------------|---------|-----------|-----------|
| rs10515291 | 5  | 99258961  | 0.0057 | 92.63% | 1.000000 | 1.000000 | 0.04051000 | 0.99860000 | ENST00000362508 | upstream   | 126446  | ---       | ---       |
| rs1473141  | 10 | 120133148 | 0.2797 | 82.81% | 0.146700 | 0.134300 | 0.04051000 | 0.00341900 | NM_022063       | upstream   | 41326   | Hs.372309 | C10orf84  |
| rs9311887  | 3  | 64329981  | 0.1090 | 93.33% | 1.000000 | 1.000000 | 0.04051000 | 0.16690000 | NM_198859       | upstream   | 143810  | Hs.699317 | PRICKLE2  |
| rs10489715 | 1  | 184039665 | 0.0243 | 94.04% | 1.000000 | 1.000000 | 0.04052000 | 0.10350000 | NM_031935       | intron     | 0       | Hs.58877  | HMCN1     |
| rs1407179  | 6  | 117831192 | 0.4727 | 96.49% | 0.184200 | 0.651900 | 0.04052000 | 0.03479000 | NM_002944       | intron     | 0       | Hs.1041   | ROS1      |
| rs3126042  | 6  | 155017159 | 0.1704 | 94.74% | 1.000000 | 1.000000 | 0.04052000 | 0.04730000 | NM_014892       | upstream   | 78992   | Hs.591329 | RBM16     |
| rs7831445  | 8  | 15625490  | 0.0243 | 94.04% | 1.000000 | 1.000000 | 0.04052000 | 0.18950000 | NM_178234       | intron     | 0       | Hs.591845 | TUSC3     |
| rs10510164 | 3  | 315536    | 0.1870 | 89.12% | 0.006091 | 0.000690 | 0.04053000 | 0.28680000 | NM_006614       | intron     | 0       | Hs.148909 | CHL1      |
| rs2302373  | 10 | 115333277 | 0.2455 | 97.89% | 0.034780 | 0.058770 | 0.04053000 | 0.03312000 | NM_004132       | intron     | 0       | Hs.422542 | HABP2     |
| rs10513381 | 3  | 152119387 | 0.0365 | 81.75% | 0.029590 | 0.040140 | 0.04056000 | 0.09950000 | NM_052995       | downstream | 7253    | Hs.380222 | CLRN1     |
| rs1692523  | 18 | 24499034  | 0.4564 | 96.49% | 0.113900 | 0.282800 | 0.04056000 | 0.01971000 | NM_001792       | upstream   | 487845  | Hs.464829 | CDH2      |
| rs4762169  | 12 | 95958668  | 0.4760 | 87.72% | 0.075400 | 0.107400 | 0.04056000 | 0.06295000 | ENST00000365498 | upstream   | 61130   | ---       | ---       |
| rs1407467  | 9  | 7958906   | 0.4065 | 91.93% | 0.522000 | 1.000000 | 0.04058000 | 0.38690000 | NM_033428       | upstream   | 168839  | Hs.7517   | C9orf123  |
| rs1066067  | 12 | 76443469  | 0.3671 | 88.42% | 0.222200 | 0.119400 | 0.04060000 | 0.02210000 | ENST00000378652 | upstream   | 250225  | ---       | ---       |
| rs1276672  | 5  | 157980115 | 0.0925 | 92.98% | 0.709100 | 1.000000 | 0.04060000 | 0.05970000 | NM_024007       | downstream | 78582   | Hs.657753 | EBF1      |
| rs285321   | 3  | 36225045  | 0.1907 | 94.74% | 0.428600 | 0.822500 | 0.04060000 | 0.12550000 | NM_003149       | upstream   | 172056  | Hs.56045  | STAC      |
| rs6827691  | 4  | 102641036 | 0.0434 | 92.98% | 1.000000 | 1.000000 | 0.04060000 | 0.08396000 | NM_000944       | upstream   | 153660  | Hs.435512 | PPP3CA    |
| rs6677149  | 1  | 111195236 | 0.4477 | 97.19% | 0.182800 | 0.073420 | 0.04061000 | 0.04364000 | ENST00000361218 | upstream   | 3208    | ---       | ---       |
| rs7423586  | 2  | 195751198 | 0.0792 | 90.88% | 0.000277 | 0.479800 | 0.04061000 | 0.21830000 | ENST00000365336 | upstream   | 335809  | ---       | ---       |
| rs10498812 | 6  | 56792169  | 0.1205 | 97.54% | 1.000000 | 1.000000 | 0.04062000 | 0.03754000 | NM_020388       | intron     | 0       | Hs.631992 | DST       |
| rs2858087  | 4  | 3238690   | 0.4424 | 97.54% | 0.808000 | 0.549700 | 0.04065000 | 0.08793000 | NM_001012982    | downstream | 3206    | Hs.442291 | LOC345222 |
| rs10492741 | 13 | 44426505  | 0.0060 | 88.42% | 0.005964 | 1.000000 | 0.04068000 | 0.99870000 | NM_012345       | intron     | 0       | Hs.525006 | NUFIP1    |
| rs1365225  | 15 | 24495712  | 0.3455 | 96.49% | 0.061620 | 0.053570 | 0.04068000 | 0.08763000 | NM_021912       | intron     | 0       | Hs.302352 | GABRB3    |
| rs8018626  | 14 | 78130702  | 0.0424 | 95.09% | 1.000000 | 1.000000 | 0.04068000 | 0.03342000 | ENST00000330071 | intron     | 0       | ---       | ---       |
| rs314564   | 13 | 88696334  | 0.0863 | 97.54% | 1.000000 | 0.564300 | 0.04069000 | 0.04689000 | NM_015567       | downstream | 1566462 | Hs.591208 | SLITRK5   |
| rs4972613  | 2  | 174456595 | 0.3893 | 85.61% | 0.003094 | 0.057410 | 0.04070000 | 0.13180000 | NM_001017371    | downstream | 24910   | Hs.531587 | SP3       |
| rs10499687 | 7  | 49804234  | 0.0873 | 96.49% | 0.443600 | 1.000000 | 0.04071000 | 0.01384000 | NM_198570       | intron     | 0       | Hs.677488 | VWC2      |
| rs7753540  | 6  | 153629421 | 0.0439 | 91.93% | 0.396300 | 0.437400 | 0.04071000 | 0.09230000 | ENST00000312401 | downstream | 15694   | ---       | ---       |
| rs9294633  | 6  | 65883178  | 0.1974 | 95.09% | 0.122300 | 0.301800 | 0.04071000 | 0.09135000 | ENST00000370616 | upstream   | 58839   | ---       | ---       |
| rs10490430 | 2  | 16977626  | 0.2177 | 87.02% | 0.024410 | 0.119300 | 0.04072000 | 0.07750000 | ENST00000386331 | downstream | 77870   | ---       | ---       |
| rs2034900  | 5  | 78351720  | 0.2133 | 97.89% | 0.596300 | 0.837500 | 0.04073000 | 0.01477000 | NM_013391       | intron     | 0       | Hs.655653 | DMGDH     |
| rs2170116  | 8  | 16157007  | 0.1187 | 97.54% | 0.245500 | 0.347900 | 0.04077000 | 0.37180000 | NM_138716       | upstream   | 62412   | Hs.147635 | MSR1      |
| rs719993   | 4  | 15076133  | 0.2122 | 97.54% | 0.858000 | 0.623000 | 0.04077000 | 0.01998000 | NM_031911       | downstream | 19248   | Hs.153714 | C1QTNF7   |
| rs756451   | 5  | 85703846  | 0.2122 | 97.54% | 0.720000 | 1.000000 | 0.04077000 | 0.01298000 | NM_001867       | upstream   | 245631  | Hs.430075 | COX7C     |
| rs1889900  | 9  | 26779975  | 0.0781 | 94.39% | 1.000000 | 1.000000 | 0.04078000 | 0.08145000 | NM_024828       | downstream | 50708   | Hs.178357 | C9orf82   |
| rs1102025  | 1  | 157150039 | 0.1625 | 97.19% | 0.186300 | 0.536700 | 0.04079000 | 0.02624000 | NM_198930       | upstream   | 17935   | Hs.380250 | PYHIN1    |
| rs10510027 | 10 | 118859597 | 0.2885 | 97.89% | 0.384800 | 0.863100 | 0.04082000 | 0.04431000 | NM_199131       | downstream | 18425   | Hs.681703 | VAX1      |
| rs1316576  | 6  | 54273276  | 0.3158 | 93.33% | 0.022550 | 0.090720 | 0.04085000 | 0.00259600 | NM_014464       | upstream   | 7886    | Hs.127011 | TINAG     |
| rs10493894 | 1  | 98038255  | 0.1554 | 88.07% | 0.631000 | 0.419300 | 0.04086000 | 0.02208000 | NM_000110       | intron     | 0       | Hs.335034 | DPYD      |
| rs6503350  | 17 | 10874259  | 0.0784 | 94.04% | 0.209500 | 0.203600 | 0.04086000 | 0.05991000 | ENST00000386899 | upstream   | 127238  | ---       | ---       |
| rs6798938  | 3  | 114700896 | 0.1697 | 95.09% | 0.385800 | 0.479300 | 0.04087000 | 0.00911000 | NM_144718       | intron     | 0       | Hs.477144 | CCDC52    |
| rs10495541 | 2  | 6684559   | 0.0973 | 77.54% | 0.039020 | 0.574700 | 0.04088000 | 0.04089000 | NM_001001695    | downstream | 102224  | ---       | FLJ42418  |
| rs1564559  | 4  | 86778363  | 0.1082 | 94.04% | 0.527500 | 0.493000 | 0.04088000 | 0.18670000 | NM_001025616    | intron     | 0       | Hs.444229 | ARHGAP24  |
| rs10507494 | 13 | 41146016  | 0.0056 | 94.39% | 1.000000 | 1.000000 | 0.04089000 | 0.99900000 | NM_015058       | intron     | 0       | Hs.368282 | KIAA0564  |
| rs10518122 | 4  | 75542740  | 0.0056 | 94.39% | 1.000000 | 1.000000 | 0.04089000 | 0.99870000 | NM_001657       | upstream   | 157123  | Hs.270833 | AREG      |
| rs10489854 | 1  | 157515483 | 0.0658 | 93.33% | 0.090990 | 0.335000 | 0.04090000 | 0.06437000 | ENST00000368119 | CDS        | 0       | ---       | ---       |
| rs1184776  | 12 | 79798196  | 0.4271 | 84.21% | 0.005601 | 0.002551 | 0.04090000 | 0.01867000 | NM_004664       | intron     | 0       | Hs.144333 | LIN7A     |
| rs1536447  | 10 | 97250554  | 0.0737 | 97.54% | 0.649500 | 1.000000 | 0.04090000 | 0.06734000 | NM_001034957    | intron     | 0       | Hs.696027 | SORBS1    |
| rs2770     | 6  | 31429786  | 0.2182 | 96.49% | 0.002403 | 0.011850 | 0.04092000 | 0.09901000 | NM_005514       | 3UTR       | 0       | Hs.77961  | HLA-B     |
| rs231683   | 17 | 3155100   | 0.4618 | 96.49% | 0.808200 | 0.282200 | 0.04094000 | 0.02451000 | NM_002551       | intron     | 0       | Hs.647414 | OR3A2     |
| rs10486429 | 7  | 24710003  | 0.0432 | 93.33% | 1.000000 | 1.000000 | 0.04095000 | 0.04886000 | NM_004403       | intron     | 0       | Hs.520708 | DFNA5     |
| rs10498141 | 2  | 223251126 | 0.1062 | 95.79% | 0.521600 | 0.489600 | 0.04095000 | 0.03351000 | NM_058165       | intron     | 0       | Hs.344090 | MOGAT1    |
| rs2394325  | 10 | 68582152  | 0.0775 | 95.09% | 1.000000 | 1.000000 | 0.04095000 | 0.00828000 | NM_013266       | intron     | 0       | Hs.660362 | CTNNA3    |
| rs413764   | 4  | 167456005 | 0.0759 | 94.74% | 0.655400 | 0.647400 | 0.04096000 | 0.07044000 | NM_016950       | downstream | 435162  | Hs.481133 | SPOCK3    |

|            |    |           |        |        |          |          |            |            |                 |            |         |           |          |
|------------|----|-----------|--------|--------|----------|----------|------------|------------|-----------------|------------|---------|-----------|----------|
| rs494338   | 8  | 20867328  | 0.4526 | 81.40% | 0.033630 | 0.028580 | 0.04096000 | 0.10360000 | ENST00000387608 | upstream   | 350611  | ---       | ---      |
| rs743136   | 1  | 184259951 | 0.4657 | 97.19% | 0.810200 | 1.000000 | 0.04098000 | 0.13200000 | NM_031935       | intron     | 0       | Hs.58877  | HMCN1    |
| rs2065042  | 20 | 52882032  | 0.4640 | 97.54% | 0.717900 | 0.551900 | 0.04103000 | 0.03855000 | NM_018431       | downstream | 180915  | Hs.656582 | DOK5     |
| rs7540176  | 1  | 42095740  | 0.2034 | 92.28% | 1.000000 | 0.517100 | 0.04103000 | 0.09776000 | NM_024503       | intron     | 0       | Hs.591503 | HIVEP3   |
| rs4781461  | 16 | 13401842  | 0.1877 | 97.19% | 0.234400 | 0.186100 | 0.04106000 | 0.05517000 | NM_005236       | upstream   | 519682  | Hs.696757 | ERCC4    |
| rs966058   | 13 | 75052056  | 0.3866 | 94.39% | 0.367800 | 0.744600 | 0.04106000 | 0.14810000 | NM_006002       | intron     | 0       | Hs.162241 | UCHL3    |
| rs10511072 | 3  | 85884225  | 0.1312 | 92.28% | 1.000000 | 0.697400 | 0.04107000 | 0.13130000 | NM_153184       | intron     | 0       | Hs.164578 | CADM2    |
| rs1073231  | 3  | 176610769 | 0.1033 | 96.84% | 1.000000 | 0.609600 | 0.04107000 | 0.06254000 | NM_207015       | intron     | 0       | Hs.660010 | NAALADL2 |
| rs10494154 | 1  | 113665954 | 0.0778 | 94.74% | 0.206200 | 0.467500 | 0.04109000 | 0.10750000 | NM_020965       | upstream   | 68940   | ---       | MAGI3    |
| rs7959125  | 12 | 79999295  | 0.1269 | 94.04% | 0.591300 | 0.770800 | 0.04109000 | 0.04565000 | NM_024560       | intron     | 0       | Hs.259559 | ACSS3    |
| rs1029707  | 7  | 108028327 | 0.3893 | 95.09% | 0.701400 | 0.538200 | 0.04110000 | 0.04160000 | NM_012328       | downstream | 25797   | Hs.6790   | DNAJB9   |
| rs10490057 | 2  | 59518115  | 0.0405 | 77.89% | 1.000000 | 1.000000 | 0.04110000 | 0.02847000 | ENST00000365640 | downstream | 115190  | ---       | ---      |
| rs10492316 | 12 | 99417212  | 0.0660 | 92.98% | 0.312100 | 0.336600 | 0.04112000 | 0.04308000 | NM_005123       | intron     | 0       | Hs.282735 | NR1H4    |
| rs362876   | 6  | 146715429 | 0.0059 | 89.12% | 0.005917 | 1.000000 | 0.04112000 | 0.99850000 | NM_000838       | intron     | 0       | Hs.32945  | GRM1     |
| rs3942865  | 6  | 55363787  | 0.3081 | 95.09% | 0.392000 | 0.612900 | 0.04114000 | 0.31380000 | NM_207410       | intron     | 0       | Hs.526967 | GFRAL    |
| rs1040903  | 6  | 111576846 | 0.4535 | 90.53% | 0.317300 | 0.157400 | 0.04117000 | 0.06634000 | NM_018593       | intron     | 0       | Hs.591327 | SLC16A10 |
| rs1874744  | 3  | 112666598 | 0.1113 | 92.98% | 0.544600 | 0.506900 | 0.04117000 | 0.03252000 | NM_005816       | upstream   | 76948   | Hs.142023 | CD96     |
| rs10489855 | 1  | 157515811 | 0.0653 | 94.04% | 0.089360 | 0.333400 | 0.04118000 | 0.04586000 | ENST00000368119 | CDS        | 0       | ---       | ---      |
| rs205953   | 6  | 118592435 | 0.0241 | 94.74% | 1.000000 | 1.000000 | 0.04121000 | 0.04983000 | NM_001029858    | intron     | 0       | Hs.654841 | SLC35F1  |
| rs1949271  | 13 | 60478385  | 0.3959 | 94.39% | 0.612500 | 1.000000 | 0.04122000 | 0.08261000 | NM_022843       | downstream | 403434  | Hs.391781 | PCDH20   |
| rs10491297 | 5  | 141868222 | 0.0866 | 97.19% | 0.441100 | 0.566500 | 0.04124000 | 0.02514000 | NM_033137       | downstream | 85085   | Hs.483635 | FGF1     |
| rs10506595 | 12 | 69191621  | 0.1292 | 93.68% | 0.784100 | 0.555400 | 0.04124000 | 0.05191000 | NM_002837       | downstream | 9610    | Hs.434375 | PTPRB    |
| rs1427478  | 7  | 33987672  | 0.3844 | 78.95% | 0.575000 | 0.866000 | 0.04124000 | 0.07114000 | NM_133468       | intron     | 0       | Hs.660998 | BMPER    |
| rs327973   | 9  | 106996520 | 0.1630 | 96.84% | 0.266800 | 0.049700 | 0.04124000 | 0.19490000 | NM_080546       | upstream   | 50204   | Hs.573495 | SLC44A1  |
| rs1406436  | 18 | 25176153  | 0.4748 | 97.54% | 0.030090 | 0.068940 | 0.04126000 | 0.05115000 | ENST00000384802 | downstream | 145663  | ---       | ---      |
| rs2589765  | 8  | 35483073  | 0.0765 | 94.04% | 0.188700 | 0.443400 | 0.04126000 | 0.10720000 | ENST00000380061 | intron     | 0       | ---       | ---      |
| rs868973   | 18 | 45909391  | 0.0740 | 97.19% | 1.000000 | 0.431600 | 0.04126000 | 0.23390000 | ENST00000285039 | intron     | 0       | ---       | ---      |
| rs2715158  | 7  | 82307542  | 0.3477 | 97.89% | 0.290500 | 0.488800 | 0.04127000 | 0.11160000 | ENST00000389477 | intron     | 0       | ---       | ---      |
| rs4650672  | 1  | 183171589 | 0.3953 | 88.77% | 0.792500 | 0.352800 | 0.04127000 | 0.06781000 | NM_052966       | intron     | 0       | Hs.518662 | FAM129A  |
| rs173671   | 5  | 12217918  | 0.2695 | 94.39% | 0.090060 | 0.070210 | 0.04128000 | 0.05180000 | NM_001332       | upstream   | 260808  | Hs.314543 | CTNND2   |
| rs9293886  | 6  | 63339439  | 0.3680 | 69.12% | 0.003596 | 0.061360 | 0.04128000 | 0.00321900 | NM_152688       | upstream   | 285348  | Hs.519794 | KHDRBS2  |
| rs308690   | 3  | 162965339 | 0.4855 | 96.49% | 0.717900 | 0.221300 | 0.04129000 | 0.03479000 | ENST00000327928 | downstream | 260915  | ---       | ---      |
| rs1073251  | 2  | 148179531 | 0.2045 | 92.63% | 0.850100 | 0.605000 | 0.04131000 | 0.02613000 | NM_001616       | upstream   | 139536  | Hs.470174 | ACVR2A   |
| rs1434406  | 4  | 158651695 | 0.1418 | 96.49% | 0.456700 | 0.715800 | 0.04131000 | 0.02410000 | NM_000826       | downstream | 145018  | Hs.32763  | GRIA2    |
| rs1957480  | 14 | 43467640  | 0.3185 | 94.74% | 0.779700 | 0.856700 | 0.04131000 | 0.09128000 | NM_152447       | downstream | 2024142 | Hs.136893 | LRFN5    |
| rs2141767  | 3  | 177333015 | 0.3459 | 97.89% | 0.791700 | 1.000000 | 0.04135000 | 0.06004000 | ENST00000366444 | downstream | 104617  | ---       | ---      |
| rs10516763 | 4  | 87171775  | 0.1093 | 94.74% | 0.221400 | 0.316200 | 0.04138000 | 0.11810000 | NM_138981       | intron     | 0       | Hs.125503 | MAPK10   |
| rs2395692  | 6  | 38232057  | 0.1097 | 94.39% | 1.000000 | 0.742400 | 0.04139000 | 0.01978000 | NM_021943       | downstream | 1682    | Hs.36959  | ZFAND3   |
| rs6602102  | 10 | 16446830  | 0.0057 | 92.98% | 1.000000 | 1.000000 | 0.04140000 | 0.99900000 | ENST00000386700 | downstream | 33830   | ---       | ---      |
| rs10493182 | 1  | 56108530  | 0.0923 | 95.09% | 0.482800 | 0.229400 | 0.04144000 | 0.05899000 | NM_207465       | downstream | 138150  | ---       | ---      |
| rs10496576 | 2  | 122681870 | 0.0923 | 95.09% | 0.482800 | 1.000000 | 0.04144000 | 0.12000000 | NM_004622       | downstream | 442457  | Hs.75066  | TSN      |
| rs10515993 | 18 | 60222306  | 0.0923 | 95.09% | 0.482800 | 1.000000 | 0.04144000 | 0.20920000 | ENST00000387753 | upstream   | 34393   | ---       | ---      |
| rs1368909  | 2  | 80082251  | 0.4532 | 97.54% | 0.228900 | 0.371000 | 0.04146000 | 0.06347000 | NM_004389       | intron     | 0       | Hs.167368 | CTNNA2   |
| rs531981   | 1  | 238012046 | 0.2491 | 97.89% | 0.148800 | 0.382300 | 0.04146000 | 0.14660000 | NM_000740       | intron     | 0       | Hs.7138   | CHRM3    |
| rs590246   | 7  | 42934785  | 0.2491 | 97.89% | 0.630700 | 0.831000 | 0.04146000 | 0.04277000 | NM_002787       | intron     | 0       | Hs.333786 | PSMA2    |
| rs283623   | 5  | 73234405  | 0.3720 | 89.12% | 0.286000 | 0.493100 | 0.04149000 | 0.01697000 | ENST00000287898 | intron     | 0       | ---       | ---      |
| rs10498411 | 14 | 48158503  | 0.0344 | 91.93% | 1.000000 | 1.000000 | 0.04150000 | 0.05674000 | ENST00000384636 | upstream   | 278218  | ---       | ---      |
| rs10492932 | 1  | 5153405   | 0.1845 | 88.42% | 0.532000 | 0.813400 | 0.04151000 | 0.06185000 | NM_001042478    | downstream | 415691  | Hs.25924  | AJAP1    |
| rs10494720 | 1  | 193309148 | 0.4747 | 97.19% | 0.279000 | 0.881100 | 0.04151000 | 0.03115000 | NM_198503       | downstream | 1152388 | Hs.657046 | KCNT2    |
| rs2068071  | 6  | 21184770  | 0.4427 | 97.89% | 0.546300 | 0.134400 | 0.04151000 | 0.01294000 | NM_017774       | intron     | 0       | Hs.657604 | CDKAL1   |
| rs968136   | 15 | 87870512  | 0.4427 | 97.89% | 0.466300 | 0.294700 | 0.04151000 | 0.31820000 | NM_016321       | upstream   | 29694   | Hs.459284 | RHCG     |
| rs4074170  | 17 | 25405267  | 0.4946 | 97.54% | 0.632500 | 1.000000 | 0.04152000 | 0.10680000 | NM_001033562    | CDS        | 0       | ---       | EFCAB5   |
| rs4332647  | 13 | 58055006  | 0.0792 | 92.98% | 0.670900 | 1.000000 | 0.04152000 | 0.25910000 | ENST00000365514 | upstream   | 55120   | ---       | ---      |
| rs8192981  | 9  | 13671648  | 0.2184 | 97.19% | 0.860000 | 0.628600 | 0.04152000 | 0.00548000 | NM_003829       | upstream   | 431291  | Hs.169378 | MPDZ     |

|            |    |           |        |        |          |          |            |            |                 |            |         |           |           |
|------------|----|-----------|--------|--------|----------|----------|------------|------------|-----------------|------------|---------|-----------|-----------|
| rs10494721 | 1  | 193309689 | 0.3569 | 96.84% | 0.693800 | 0.611600 | 0.04153000 | 0.03541000 | NM_198503       | downstream | 1151847 | Hs.657046 | KCNT2     |
| rs2883953  | 8  | 114570395 | 0.3870 | 94.74% | 0.123500 | 0.440100 | 0.04153000 | 0.06115000 | NM_052900       | upstream   | 51977   | Hs.91381  | CSMD3     |
| rs2245747  | 10 | 42236621  | 0.2000 | 94.74% | 0.702900 | 1.000000 | 0.04154000 | 0.03360000 | ENST00000345581 | intron     | 0       | ---       | ---       |
| rs10499210 | 6  | 139626307 | 0.0240 | 95.09% | 1.000000 | 1.000000 | 0.04158000 | 0.07023000 | NM_153235       | intron     | 0       | Hs.535820 | TXLNB     |
| rs1372218  | 5  | 112020387 | 0.4873 | 96.49% | 0.070040 | 0.447800 | 0.04158000 | 0.20870000 | NM_000038       | upstream   | 81096   | Hs.158932 | APC       |
| rs37684    | 5  | 59769122  | 0.4117 | 93.33% | 0.526500 | 0.630200 | 0.04158000 | 0.02134000 | ENST00000356568 | downstream | 6426    | ---       | ---       |
| rs1342947  | 1  | 156726338 | 0.4711 | 97.19% | 0.227700 | 0.445400 | 0.04159000 | 0.25680000 | NM_001004472    | downstream | 9039    | Hs.704755 | OR10R2    |
| rs1384747  | 8  | 90213747  | 0.3525 | 97.54% | 0.792700 | 0.393200 | 0.04161000 | 0.07575000 | NM_003821       | upstream   | 625426  | Hs.103755 | RIPK2     |
| rs7861646  | 9  | 23722000  | 0.3525 | 97.54% | 0.694800 | 0.231800 | 0.04161000 | 0.07536000 | NM_004432       | intron     | 0       | Hs.166109 | ELAVL2    |
| rs728611   | 1  | 19821094  | 0.1474 | 94.04% | 0.624400 | 0.593000 | 0.04162000 | 0.06212000 | NM_001032363    | intron     | 0       | Hs.466662 | C1orf151  |
| rs10508855 | 10 | 37110805  | 0.1493 | 94.04% | 0.148300 | 0.483700 | 0.04163000 | 0.17830000 | NM_052997       | upstream   | 343986  | Hs.373787 | ANKRD30A  |
| rs3849400  | 2  | 22766039  | 0.3962 | 92.98% | 0.898500 | 0.875800 | 0.04163000 | 0.02127000 | ENST00000388128 | upstream   | 171892  | ---       | ---       |
| rs10484899 | 6  | 108661772 | 0.1074 | 94.74% | 1.000000 | 1.000000 | 0.04164000 | 0.22940000 | NM_003795       | intron     | 0       | Hs.12102  | SNX3      |
| rs273884   | 1  | 97045901  | 0.3923 | 86.32% | 0.001292 | 0.000181 | 0.04164000 | 0.07643000 | NM_021190       | intron     | 0       | Hs.591430 | PTBP2     |
| rs7176275  | 15 | 91700530  | 0.1074 | 94.74% | 0.208200 | 0.166000 | 0.04164000 | 0.14220000 | ENST00000386183 | downstream | 63984   | ---       | ---       |
| rs10519336 | 5  | 112508003 | 0.2041 | 93.68% | 0.087370 | 0.071400 | 0.04165000 | 0.01457000 | NM_002387       | intron     | 0       | Hs.593171 | MCC       |
| rs10489340 | 1  | 207864691 | 0.0340 | 92.98% | 1.000000 | 1.000000 | 0.04166000 | 0.07212000 | NM_001017402    | intron     | 0       | Hs.497636 | LAMB3     |
| rs10486584 | 7  | 28443038  | 0.3755 | 94.39% | 0.795200 | 0.865500 | 0.04167000 | 0.23240000 | NM_001011666    | intron     | 0       | Hs.437075 | CREB5     |
| rs858792   | 1  | 165025361 | 0.0888 | 84.91% | 0.412100 | 0.539100 | 0.04167000 | 0.03749000 | NM_017542       | upstream   | 49987   | Hs.432752 | POGK      |
| rs229750   | 14 | 44328959  | 0.0336 | 94.04% | 0.255600 | 0.300000 | 0.04171000 | 0.06058000 | NM_001017923    | upstream   | 107298  | Hs.82098  | C14orf28  |
| rs10495927 | 2  | 46206003  | 0.2268 | 94.39% | 0.727600 | 0.314200 | 0.04172000 | 0.02039000 | NM_005400       | intron     | 0       | Hs.580351 | PRKCE     |
| rs10514242 | 5  | 81994082  | 0.2960 | 97.19% | 0.002378 | 0.000641 | 0.04172000 | 0.22700000 | NM_001039779    | downstream | 275991  | ---       | FLJ41309  |
| rs153235   | 5  | 80463678  | 0.2960 | 97.19% | 0.193700 | 0.495600 | 0.04172000 | 0.07331000 | NM_006909       | intron     | 0       | Hs.162129 | RASGRF2   |
| rs2103084  | 3  | 192816407 | 0.2268 | 94.39% | 0.863000 | 0.546400 | 0.04172000 | 0.01229000 | ENST00000364990 | upstream   | 25212   | ---       | ---       |
| rs2956147  | 15 | 31046945  | 0.2960 | 97.19% | 0.470600 | 0.495600 | 0.04172000 | 0.13470000 | ENST00000334528 | intron     | 0       | ---       | ---       |
| rs4657796  | 1  | 193319560 | 0.4748 | 97.54% | 0.335600 | 0.880800 | 0.04172000 | 0.02982000 | NM_198503       | downstream | 1141976 | Hs.657046 | KCNT2     |
| rs10513138 | 5  | 13454407  | 0.0061 | 86.67% | 1.000000 | 1.000000 | 0.04173000 | 0.99870000 | NM_001369       | downstream | 289030  | Hs.212360 | DNAH5     |
| rs947268   | 1  | 120178000 | 0.1920 | 87.72% | 0.023600 | 0.169100 | 0.04174000 | 0.16570000 | NM_032044       | upstream   | 22194   | Hs.660883 | REG4      |
| rs10507902 | 13 | 79513112  | 0.0272 | 90.18% | 1.000000 | 1.000000 | 0.04175000 | 0.02841000 | NM_005842       | downstream | 295000  | Hs.18676  | SPRY2     |
| rs10489716 | 1  | 184040194 | 0.0258 | 95.09% | 1.000000 | 1.000000 | 0.04177000 | 0.07474000 | NM_031935       | intron     | 0       | Hs.58877  | HMCN1     |
| rs10507898 | 13 | 78805175  | 0.0258 | 95.09% | 1.000000 | 1.000000 | 0.04177000 | 0.02075000 | NM_022118       | intron     | 0       | Hs.558528 | RBM26     |
| rs2053848  | 13 | 38142418  | 0.3403 | 92.28% | 0.583000 | 0.721800 | 0.04178000 | 0.03157000 | NM_207361       | upstream   | 17064   | Hs.253994 | FREM2     |
| rs1396571  | 12 | 126165117 | 0.1882 | 97.89% | 1.000000 | 0.786600 | 0.04180000 | 0.07067000 | ENST00000386224 | downstream | 51289   | ---       | ---       |
| rs9323656  | 14 | 77394323  | 0.0327 | 96.49% | 1.000000 | 1.000000 | 0.04180000 | 0.06578000 | NM_020421       | intron     | 0       | Hs.413208 | ADCK1     |
| rs10484057 | 14 | 98010218  | 0.0324 | 97.54% | 1.000000 | 1.000000 | 0.04181000 | 0.01648000 | NM_182560       | upstream   | 237485  | Hs.448754 | C14orf177 |
| rs10490396 | 2  | 56317650  | 0.0056 | 93.68% | 0.005629 | 1.000000 | 0.04181000 | 0.99860000 | ENST00000233161 | intron     | 0       | ---       | ---       |
| rs947861   | 11 | 85005633  | 0.2452 | 91.58% | 0.018430 | 0.039290 | 0.04182000 | 0.23070000 | NM_018480       | upstream   | 11663   | Hs.525063 | TMEM126B  |
| rs544080   | 13 | 95474210  | 0.4695 | 97.89% | 0.810000 | 0.881100 | 0.04183000 | 0.06535000 | NM_020121       | intron     | 0       | Hs.193226 | UGCGL2    |
| rs887695   | 2  | 191201411 | 0.1488 | 84.91% | 0.798300 | 1.000000 | 0.04184000 | 0.02812000 | NM_005966       | upstream   | 20682   | Hs.570078 | NAB1      |
| rs309762   | 4  | 177727556 | 0.1189 | 85.61% | 1.000000 | 0.740600 | 0.04188000 | 0.03804000 | NM_005429       | downstream | 114129  | Hs.435215 | VEGFC     |
| rs1982939  | 12 | 129433601 | 0.0926 | 94.74% | 1.000000 | 0.602900 | 0.04189000 | 0.04874000 | NM_004764       | downstream | 10776   | Hs.405659 | PIWIL1    |
| rs7158689  | 14 | 87575945  | 0.0926 | 94.74% | 0.484400 | 0.231400 | 0.04189000 | 0.01618000 | NM_003608       | downstream | 27781   | Hs.513440 | GPR65     |
| rs10485214 | 6  | 153740608 | 0.1619 | 97.54% | 0.383000 | 0.536700 | 0.04190000 | 0.03539000 | ENST00000364238 | upstream   | 42659   | ---       | ---       |
| rs6795968  | 3  | 23392031  | 0.3502 | 97.19% | 0.008368 | 0.055240 | 0.04190000 | 0.01174000 | NM_152653       | intron     | 0       | Hs.475688 | UBE2E2    |
| rs10505852 | 12 | 19787991  | 0.0242 | 94.39% | 1.000000 | 1.000000 | 0.04192000 | 0.17200000 | NM_000921       | upstream   | 625495  | Hs.591150 | PDE3A     |
| rs10485262 | 6  | 154181892 | 0.1423 | 96.14% | 1.000000 | 1.000000 | 0.04193000 | 0.02540000 | NM_001008505    | upstream   | 220244  | Hs.2353   | OPRM1     |
| rs7155413  | 14 | 61016413  | 0.0057 | 91.58% | 0.005758 | 1.000000 | 0.04193000 | 0.99840000 | NM_006255       | intron     | 0       | Hs.333907 | PRKCH     |
| rs354532   | 6  | 111655506 | 0.4570 | 97.89% | 0.398300 | 0.646200 | 0.04194000 | 0.05465000 | NM_018593       | downstream | 3668    | Hs.591327 | SLC16A10  |
| rs4144592  | 9  | 121018601 | 0.4570 | 97.89% | 0.229000 | 0.361000 | 0.04194000 | 0.07896000 | NM_014618       | intron     | 0       | Hs.532316 | DBC1      |
| rs7979386  | 12 | 30966129  | 0.3327 | 92.28% | 0.210500 | 0.740300 | 0.04195000 | 0.04905000 | ENST00000261177 | upstream   | 32064   | ---       | ---       |
| rs10518772 | 15 | 52655153  | 0.0262 | 93.68% | 1.000000 | 1.000000 | 0.04199000 | 0.09026000 | ENST00000260323 | intron     | 0       | ---       | ---       |
| rs10517855 | 4  | 63802754  | 0.0434 | 92.98% | 1.000000 | 1.000000 | 0.04200000 | 0.05960000 | NM_001010874    | downstream | 1025631 | Hs.227752 | SRD5A2L2  |
| rs2080326  | 2  | 202056548 | 0.4729 | 97.19% | 0.717700 | 1.000000 | 0.04201000 | 0.09606000 | NM_018571       | downstream | 2853    | Hs.652338 | ALS2CR2   |
| rs977274   | 8  | 95348936  | 0.4049 | 86.67% | 0.693000 | 0.867300 | 0.04202000 | 0.03668000 | NM_181702       | upstream   | 5203    | Hs.654463 | GEM       |

|            |    |           |        |        |          |          |            |            |                 |            |         |           |          |
|------------|----|-----------|--------|--------|----------|----------|------------|------------|-----------------|------------|---------|-----------|----------|
| rs1951549  | 14 | 43389373  | 0.4427 | 91.93% | 0.707500 | 0.341900 | 0.04204000 | 0.09141000 | NM_152447       | downstream | 1945875 | Hs.136893 | LRFN5    |
| rs10489774 | 1  | 56290538  | 0.4916 | 83.86% | 0.069710 | 0.340500 | 0.04205000 | 0.05000000 | NM_207465       | downstream | 320158  | ---       | ---      |
| rs1174600  | 12 | 57021979  | 0.4267 | 93.33% | 0.210100 | 0.346000 | 0.04205000 | 0.07405000 | NM_153377       | downstream | 530226  | Hs.253736 | LRIG3    |
| rs10485147 | 6  | 84180069  | 0.4910 | 97.54% | 0.718800 | 0.366500 | 0.04207000 | 0.07796000 | NM_002395       | intron     | 0       | Hs.21160  | ME1      |
| rs950487   | 1  | 156726754 | 0.4713 | 97.89% | 0.186100 | 0.362700 | 0.04207000 | 0.25610000 | NM_00100472     | downstream | 9455    | Hs.704755 | OR10R2   |
| rs10509024 | 10 | 56567832  | 0.0323 | 97.89% | 1.000000 | 1.000000 | 0.04210000 | 0.01116000 | NM_033056       | upstream   | 336775  | Hs.672170 | PCDH15   |
| rs2414367  | 15 | 52790015  | 0.0323 | 97.89% | 0.026580 | 1.000000 | 0.04210000 | 0.21940000 | NM_016304       | downstream | 470798  | Hs.274772 | C15orf15 |
| rs7668692  | 4  | 65933645  | 0.0187 | 94.04% | 1.000000 | 1.000000 | 0.04210000 | 0.03740000 | NM_182472       | intron     | 0       | Hs.654492 | EPHA5    |
| rs9320607  | 6  | 117963564 | 0.0323 | 97.89% | 0.246600 | 1.000000 | 0.04210000 | 0.03260000 | NM_173674       | intron     | 0       | Hs.658304 | DCBLD1   |
| rs10515799 | 5  | 158919215 | 0.1493 | 94.04% | 0.811200 | 0.789700 | 0.04211000 | 0.17150000 | NM_002187       | upstream   | 229156  | Hs.674    | IL12B    |
| rs1612279  | 4  | 161243608 | 0.3610 | 97.19% | 0.514600 | 0.529600 | 0.04215000 | 0.01590000 | ENST00000385897 | downstream | 462028  | ---       | ---      |
| rs10515961 | 18 | 49185236  | 0.3296 | 93.68% | 0.053250 | 0.188300 | 0.04217000 | 0.09758000 | NM_005215       | intron     | 0       | Hs.579550 | DCC      |
| rs9297381  | 8  | 107403507 | 0.2582 | 95.79% | 0.080940 | 0.095380 | 0.04219000 | 0.17760000 | NM_181354       | upstream   | 335763  | Hs.148778 | OXR1     |
| rs1323802  | 9  | 97911153  | 0.1403 | 88.77% | 0.117900 | 0.051440 | 0.04221000 | 0.11240000 | ENST00000363183 | downstream | 358801  | ---       | ---      |
| rs1916961  | 2  | 189300129 | 0.0894 | 96.14% | 0.248800 | 0.432200 | 0.04221000 | 0.07904000 | NM_052952       | downstream | 6628    | Hs.470892 | DIRC1    |
| rs7122992  | 11 | 33993259  | 0.0653 | 94.04% | 0.612200 | 1.000000 | 0.04221000 | 0.01204000 | NM_203364       | upstream   | 37285   | Hs.471818 | CAPRIN1  |
| rs10487525 | 7  | 144463196 | 0.2080 | 91.93% | 0.710100 | 0.671700 | 0.04222000 | 0.03341000 | ENST00000363803 | upstream   | 285086  | ---       | ---      |
| rs1482650  | 3  | 43459673  | 0.2360 | 93.68% | 0.397700 | 0.357200 | 0.04222000 | 0.07649000 | NM_018075       | intron     | 0       | Hs.656657 | TMEM16K  |
| rs2890898  | 9  | 9964221   | 0.1996 | 94.04% | 0.849900 | 0.662900 | 0.04222000 | 0.21150000 | ENST00000363183 | downstream | 531869  | ---       | ---      |
| rs7341478  | 7  | 81592385  | 0.2263 | 96.14% | 1.000000 | 0.843100 | 0.04223000 | 0.02723000 | NM_000722       | intron     | 0       | Hs.282151 | CACNA2D1 |
| rs31564    | 5  | 135258152 | 0.3868 | 92.98% | 0.436700 | 0.271600 | 0.04224000 | 0.04094000 | NM_000590       | intron     | 0       | Hs.960    | IL9      |
| rs1047022  | 7  | 26546774  | 0.1403 | 97.54% | 0.802700 | 1.000000 | 0.04225000 | 0.05382000 | NM_003930       | downstream | 126441  | Hs.200770 | SKAP2    |
| rs4294760  | 15 | 51573583  | 0.2168 | 97.89% | 0.293900 | 0.807900 | 0.04225000 | 0.06247000 | NM_182758       | downstream | 21090   | Hs.122125 | WDR72    |
| rs4538888  | 8  | 9254784   | 0.1403 | 97.54% | 0.453500 | 0.420600 | 0.04225000 | 0.01834000 | ENST00000382558 | upstream   | 6976    | ---       | ---      |
| rs6721063  | 2  | 151628774 | 0.1403 | 97.54% | 0.621000 | 0.579500 | 0.04225000 | 0.07083000 | NM_198557       | downstream | 185382  | Hs.302442 | RBM43    |
| rs702974   | 16 | 78204225  | 0.2168 | 97.89% | 0.483800 | 0.628900 | 0.04225000 | 0.05022000 | NM_001031804    | upstream   | 12113   | Hs.134859 | MAF      |
| rs7513705  | 1  | 93438937  | 0.4676 | 97.54% | 0.022230 | 0.071540 | 0.04226000 | 0.02529000 | NM_206886       | intron     | 0       | Hs.310637 | CCDC18   |
| rs4886239  | 13 | 60017463  | 0.4808 | 91.23% | 0.083630 | 0.122200 | 0.04228000 | 0.01992000 | NM_030794       | intron     | 0       | Hs.525061 | TDRD3    |
| rs529579   | 19 | 39360134  | 0.3750 | 95.44% | 1.000000 | 0.737300 | 0.04228000 | 0.15440000 | NM_015578       | intron     | 0       | Hs.407368 | LSM14A   |
| rs1863440  | 8  | 81222113  | 0.3647 | 89.47% | 0.224000 | 0.607300 | 0.04229000 | 0.07137000 | NM_005079       | intron     | 0       | Hs.368433 | TPD52    |
| rs6712682  | 2  | 151632773 | 0.1416 | 97.89% | 0.621500 | 0.421100 | 0.04231000 | 0.06253000 | NM_198557       | downstream | 181383  | Hs.302442 | RBM43    |
| rs1196155  | 2  | 182629517 | 0.2563 | 97.19% | 0.755000 | 1.000000 | 0.04235000 | 0.01636000 | ENST00000280295 | intron     | 0       | ---       | ---      |
| rs2911524  | 13 | 69326151  | 0.2563 | 97.19% | 1.000000 | 1.000000 | 0.04235000 | 0.09972000 | NM_020866       | intron     | 0       | Hs.508201 | KLHL1    |
| rs10492626 | 13 | 93941954  | 0.2168 | 89.82% | 0.356500 | 0.802100 | 0.04236000 | 0.06828000 | NM_001922       | upstream   | 12030   | Hs.301865 | DCT      |
| rs1343982  | 1  | 65817839  | 0.3305 | 83.86% | 0.056530 | 0.117100 | 0.04237000 | 0.12780000 | NM_001003680    | intron     | 0       | Hs.705413 | LEPR     |
| rs341148   | 6  | 158759986 | 0.1563 | 89.82% | 0.231000 | 0.036920 | 0.04238000 | 0.05097000 | NM_001007466    | intron     | 0       | Hs.486993 | TULP4    |
| rs1651215  | 4  | 161233738 | 0.3587 | 96.84% | 0.600700 | 0.636100 | 0.04240000 | 0.01737000 | ENST00000385897 | downstream | 471898  | ---       | ---      |
| rs2903581  | 16 | 14247571  | 0.0338 | 93.33% | 0.257300 | 0.300000 | 0.04241000 | 0.11060000 | NM_014048       | intron     | 0       | Hs.592047 | MKL2     |
| rs1156605  | 3  | 25998305  | 0.3000 | 89.47% | 0.766000 | 1.000000 | 0.04242000 | 0.08624000 | NM_017897       | downstream | 187277  | Hs.55781  | OXSM     |
| rs1444504  | 8  | 93348728  | 0.4874 | 97.19% | 0.030240 | 0.050620 | 0.04242000 | 0.03507000 | ENST00000363950 | upstream   | 99774   | ---       | ---      |
| rs1504910  | 3  | 59585967  | 0.1631 | 97.89% | 0.270900 | 0.458100 | 0.04245000 | 0.10310000 | NM_002012       | downstream | 127025  | Hs.655995 | FHIT     |
| rs9309326  | 2  | 60478443  | 0.2731 | 95.09% | 0.362500 | 1.000000 | 0.04245000 | 0.02964000 | NM_018014       | downstream | 53363   | Hs.370549 | BCL11A   |
| rs1514540  | 13 | 60483549  | 0.4030 | 94.04% | 0.611500 | 0.871200 | 0.04246000 | 0.06848000 | NM_022843       | downstream | 398270  | Hs.391781 | PCDH20   |
| rs10499942 | 7  | 97621592  | 0.1934 | 96.14% | 0.330700 | 0.124100 | 0.04248000 | 0.00647700 | NM_014916       | intron     | 0       | Hs.444179 | LMTK2    |
| rs1188306  | 8  | 13110780  | 0.2397 | 93.68% | 0.738600 | 0.111800 | 0.04248000 | 0.08920000 | NM_182643       | intron     | 0       | Hs.134296 | DLC1     |
| rs716077   | 8  | 131194895 | 0.2333 | 94.74% | 1.000000 | 1.000000 | 0.04248000 | 0.23480000 | NM_018482       | intron     | 0       | Hs.655552 | DDEF1    |
| rs10504003 | 8  | 37247698  | 0.3359 | 90.88% | 0.036140 | 0.359300 | 0.04249000 | 0.34210000 | NM_021631       | downstream | 381712  | Hs.651853 | FKSG2    |
| rs10516511 | 4  | 106040880 | 0.4942 | 60.35% | 0.000000 | 0.000000 | 0.04250000 | 0.08162000 | NM_025212       | upstream   | 405380  | Hs.12248  | CXXC4    |
| rs1322960  | 13 | 52650341  | 0.4005 | 68.77% | 0.766300 | 0.716900 | 0.04250000 | 0.02007000 | NM_006418       | downstream | 126154  | Hs.559736 | OLFM4    |
| rs10487920 | 7  | 146089012 | 0.1421 | 97.54% | 0.012250 | 0.029620 | 0.04252000 | 0.10200000 | ENST00000307013 | intron     | 0       | ---       | ---      |
| rs1846466  | 3  | 1167829   | 0.1421 | 97.54% | 0.806300 | 1.000000 | 0.04252000 | 0.01433000 | NM_014461       | intron     | 0       | Hs.387300 | CNTN6    |
| rs6541279  | 1  | 229820086 | 0.4885 | 91.23% | 0.025930 | 0.046570 | 0.04252000 | 0.03478000 | ENST00000366656 | intron     | 0       | ---       | ---      |
| rs425567   | 21 | 17150110  | 0.3107 | 95.44% | 0.573500 | 0.313600 | 0.04255000 | 0.34300000 | ENST00000365203 | downstream | 136763  | ---       | ---      |
| rs10517469 | 4  | 37773873  | 0.0938 | 78.60% | 0.110400 | 0.399600 | 0.04256000 | 0.09223000 | NM_015173       | intron     | 0       | Hs.176503 | TBC1D1   |

|            |    |           |        |        |          |          |            |            |                 |            |         |           |           |
|------------|----|-----------|--------|--------|----------|----------|------------|------------|-----------------|------------|---------|-----------|-----------|
| rs473968   | 11 | 84688230  | 0.2600 | 96.49% | 0.275600 | 0.831100 | 0.04257000 | 0.07469000 | NM_001364       | upstream   | 982394  | Hs.654862 | DLG2      |
| rs6737341  | 2  | 119040468 | 0.0098 | 89.47% | 1.000000 | 1.000000 | 0.04257000 | 0.15320000 | NM_001426       | downstream | 275768  | Hs.271977 | EN1       |
| rs9317825  | 13 | 69043126  | 0.2229 | 87.37% | 1.000000 | 0.680600 | 0.04257000 | 0.20300000 | NM_020866       | downstream | 129600  | Hs.508201 | KLHL1     |
| rs10496818 | 2  | 139849720 | 0.1369 | 88.42% | 1.000000 | 1.000000 | 0.04259000 | 0.10700000 | ENST00000384174 | upstream   | 135744  | ---       | ---       |
| rs2961370  | 12 | 19431361  | 0.3043 | 96.84% | 0.016020 | 0.003882 | 0.04259000 | 0.01005000 | NM_019012       | downstream | 10763   | Hs.188614 | PLEKHA5   |
| rs10486009 | 7  | 97316047  | 0.1643 | 97.19% | 1.000000 | 0.630300 | 0.04260000 | 0.08492000 | NM_183356       | downstream | 3332    | Hs.489207 | ASNS      |
| rs546848   | 6  | 81285137  | 0.4245 | 92.98% | 0.380500 | 0.645500 | 0.04265000 | 0.03305000 | NM_000056       | downstream | 172447  | Hs.654441 | BCKDHB    |
| rs475348   | 9  | 103219299 | 0.4874 | 97.54% | 1.000000 | 1.000000 | 0.04266000 | 0.11960000 | NM_000035       | downstream | 3382    | Hs.530274 | ALDOB     |
| rs10505504 | 8  | 128769526 | 0.4198 | 94.04% | 0.617500 | 0.170900 | 0.04267000 | 0.02725000 | NM_002467       | upstream   | 47972   | Hs.202453 | MYC       |
| rs7563206  | 2  | 215898899 | 0.4033 | 94.39% | 0.447000 | 0.282600 | 0.04270000 | 0.06242000 | NM_004044       | intron     | 0       | Hs.90280  | ATIC      |
| rs10494700 | 1  | 192400158 | 0.1825 | 92.28% | 0.541800 | 0.355500 | 0.04272000 | 0.03938000 | ENST00000385495 | downstream | 323698  | ---       | ---       |
| rs2076635  | 6  | 52523998  | 0.1754 | 94.04% | 1.000000 | 1.000000 | 0.04274000 | 0.16150000 | NM_012288       | intron     | 0       | Hs.520182 | TRAM2     |
| rs10497658 | 2  | 185354265 | 0.0255 | 96.14% | 1.000000 | 1.000000 | 0.04275000 | 0.01549000 | NM_194250       | intron     | 0       | Hs.159528 | ZNF804A   |
| rs10516882 | 4  | 92127599  | 0.1832 | 91.93% | 0.149000 | 0.259400 | 0.04275000 | 0.01897000 | NM_207491       | intron     | 0       | Hs.654735 | MGC48628  |
| rs9287868  | 2  | 167135645 | 0.0255 | 96.14% | 0.000268 | 0.028210 | 0.04275000 | 0.08514000 | NM_002976       | upstream   | 83918   | Hs.695947 | SCN7A     |
| rs10484168 | 14 | 96633495  | 0.0330 | 95.79% | 0.027700 | 0.059640 | 0.04276000 | 0.16940000 | NM_003384       | downstream | 215792  | Hs.422662 | VRK1      |
| rs1178102  | 7  | 18704391  | 0.3259 | 94.74% | 0.405300 | 0.623700 | 0.04278000 | 0.04337000 | NM_178425       | intron     | 0       | Hs.196054 | HDAC9     |
| rs7187550  | 16 | 53230696  | 0.2204 | 97.89% | 0.161500 | 0.095650 | 0.04278000 | 0.03752000 | NM_005853       | upstream   | 291916  | Hs.435730 | IRX5      |
| rs10244401 | 7  | 24409901  | 0.3628 | 97.19% | 0.193500 | 0.498300 | 0.04281000 | 0.03168000 | NM_000905       | downstream | 111899  | Hs.1832   | NPY       |
| rs10490029 | 2  | 210650144 | 0.3290 | 94.39% | 0.410500 | 0.513200 | 0.04281000 | 0.04300000 | NM_152519       | intron     | 0       | Hs.591638 | FLJ23861  |
| rs4359155  | 10 | 61484423  | 0.3664 | 97.19% | 0.197900 | 1.000000 | 0.04282000 | 0.04968000 | NM_001149       | intron     | 0       | Hs.499725 | ANK3      |
| rs2116648  | 7  | 42499900  | 0.1000 | 87.72% | 0.721100 | 0.601200 | 0.04285000 | 0.23130000 | NM_000168       | upstream   | 270480  | Hs.21509  | GLI3      |
| rs2256552  | 21 | 35028656  | 0.2332 | 94.04% | 0.865000 | 0.558300 | 0.04285000 | 0.04942000 | NM_053277       | downstream | 16267   | Hs.702188 | CLIC6     |
| rs1998277  | 11 | 34265813  | 0.2681 | 87.02% | 0.034680 | 0.085500 | 0.04286000 | 0.01063000 | NM_145804       | intron     | 0       | Hs.23361  | ABTB2     |
| rs4739323  | 8  | 36663871  | 0.1741 | 94.74% | 0.523600 | 1.000000 | 0.04286000 | 0.05402000 | ENST00000363115 | upstream   | 77250   | ---       | ---       |
| rs4743380  | 9  | 101847100 | 0.3095 | 95.79% | 0.574300 | 0.866100 | 0.04290000 | 0.06412000 | NM_015051       | intron     | 0       | Hs.591899 | TXNDC4    |
| rs217692   | 14 | 61473002  | 0.0888 | 96.84% | 0.144700 | 0.227100 | 0.04291000 | 0.02021000 | NM_031914       | upstream   | 59489   | Hs.404139 | SYT16     |
| rs32768    | 5  | 35407927  | 0.1767 | 93.33% | 1.000000 | 1.000000 | 0.04292000 | 0.02957000 | NM_000949       | upstream   | 141593  | Hs.368587 | PRLR      |
| rs10490202 | 2  | 102527264 | 0.2776 | 85.96% | 0.873900 | 0.463600 | 0.04293000 | 0.10560000 | NM_001011552    | downstream | 10405   | Hs.447686 | SLC9A4    |
| rs503314   | 2  | 70528257  | 0.3713 | 95.44% | 0.697800 | 0.874100 | 0.04294000 | 0.03091000 | NM_003236       | 3UTR       | 0       | Hs.170009 | TGFA      |
| rs10250146 | 7  | 46981249  | 0.2815 | 83.51% | 0.003900 | 0.082720 | 0.04296000 | 0.21690000 | NM_022748       | downstream | 300030  | Hs.520814 | TNS3      |
| rs469783   | 5  | 96147280  | 0.4339 | 84.91% | 0.793400 | 1.000000 | 0.04296000 | 0.15500000 | NM_001040458    | CDS        | 0       | Hs.436186 | ERAP1     |
| rs899467   | 5  | 117546401 | 0.1647 | 88.42% | 0.166100 | 1.000000 | 0.04296000 | 0.18360000 | ENST00000329863 | upstream   | 403787  | ---       | ---       |
| rs2014195  | 3  | 7014450   | 0.2807 | 94.39% | 0.650100 | 0.431800 | 0.04297000 | 0.04258000 | NM_181874       | intron     | 0       | Hs.660131 | GRM7      |
| rs17757084 | 16 | 78159145  | 0.0395 | 80.00% | 0.002678 | 0.003923 | 0.04298000 | 0.13210000 | NM_001031804    | downstream | 26591   | Hs.134859 | MAF       |
| rs3856451  | 2  | 8704019   | 0.4978 | 78.60% | 0.230800 | 0.744100 | 0.04299000 | 0.07871000 | NM_002166       | upstream   | 32772   | Hs.180919 | ID2       |
| rs10500766 | 11 | 12876485  | 0.1155 | 92.63% | 1.000000 | 0.651000 | 0.04300000 | 0.01809000 | NM_021961       | intron     | 0       | Hs.655331 | TEAD1     |
| rs2856206  | 17 | 15421834  | 0.2059 | 83.51% | 0.162400 | 0.413800 | 0.04300000 | 0.06285000 | ENST00000379628 | intron     | 0       | ---       | ---       |
| rs626804   | 9  | 9529114   | 0.1364 | 88.77% | 0.430200 | 0.564000 | 0.04301000 | 0.03935000 | ENST00000363183 | downstream | 96762   | ---       | ---       |
| rs2024741  | 6  | 107285089 | 0.4808 | 91.58% | 0.710200 | 0.354100 | 0.04302000 | 0.07952000 | NM_018292       | downstream | 62104   | Hs.406917 | QRSL1     |
| rs10484261 | 6  | 10091850  | 0.0878 | 97.89% | 1.000000 | 1.000000 | 0.04309000 | 0.03940000 | NM_153003       | intron     | 0       | Hs.532138 | OFCC1     |
| rs10487060 | 7  | 86428289  | 0.0878 | 97.89% | 0.453900 | 1.000000 | 0.04309000 | 0.09693000 | NM_152748       | upstream   | 19665   | Hs.208093 | KIAA1324L |
| rs2514322  | 8  | 99304253  | 0.0878 | 97.89% | 0.245800 | 0.115300 | 0.04309000 | 0.02420000 | NM_024759       | intron     | 0       | Hs.309489 | NPAL2     |
| rs3118225  | 1  | 49237254  | 0.4126 | 86.32% | 0.087300 | 0.130700 | 0.04309000 | 0.18500000 | ENST00000371836 | intron     | 0       | ---       | ---       |
| rs997427   | 5  | 5220587   | 0.4093 | 94.74% | 0.078990 | 0.067340 | 0.04309000 | 0.00833400 | NM_139056       | intron     | 0       | Hs.661915 | ADAMTS16  |
| rs10507108 | 12 | 98119420  | 0.1524 | 94.39% | 1.000000 | 0.794700 | 0.04310000 | 0.08082000 | NM_020140       | intron     | 0       | Hs.506458 | ANKS1B    |
| rs1156110  | 5  | 12518018  | 0.2741 | 94.74% | 0.091630 | 0.048650 | 0.04311000 | 0.08760000 | NM_001369       | downstream | 1227021 | Hs.212360 | DNAH5     |
| rs4904705  | 14 | 90094687  | 0.3664 | 81.40% | 0.887500 | 0.736700 | 0.04312000 | 0.19900000 | NM_001010854    | intron     | 0       | Hs.655697 | TTC7B     |
| rs7620700  | 3  | 114753680 | 0.0894 | 96.14% | 0.049640 | 0.121200 | 0.04312000 | 0.38010000 | NM_017699       | intron     | 0       | Hs.591291 | SIDT1     |
| rs10483668 | 14 | 56052341  | 0.0252 | 97.54% | 1.000000 | 1.000000 | 0.04314000 | 0.04596000 | NM_017799       | upstream   | 63923   | Hs.497253 | C14orf101 |
| rs2269197  | 5  | 109064976 | 0.0252 | 97.54% | 1.000000 | 1.000000 | 0.04314000 | 0.00595100 | NM_002372       | intron     | 0       | Hs.432822 | MAN2A1    |
| rs2613163  | 18 | 63652390  | 0.1500 | 94.74% | 0.633800 | 0.743800 | 0.04314000 | 0.13460000 | NM_032160       | upstream   | 317443  | Hs.124673 | DSEL      |
| rs3901894  | 13 | 95204126  | 0.4113 | 92.98% | 0.799800 | 1.000000 | 0.04314000 | 0.07606000 | NM_006260       | intron     | 0       | Hs.656476 | DNAJC3    |
| rs9287104  | 1  | 197898148 | 0.1578 | 92.28% | 0.247500 | 0.120600 | 0.04314000 | 0.12180000 | ENST00000385491 | downstream | 81203   | ---       | ---       |

|            |    |           |        |        |          |          |            |            |                 |            |         |           |           |
|------------|----|-----------|--------|--------|----------|----------|------------|------------|-----------------|------------|---------|-----------|-----------|
| rs358523   | 5  | 63253368  | 0.1245 | 95.79% | 0.779500 | 1.000000 | 0.04315000 | 0.02366000 | NM_000524       | downstream | 38666   | Hs.247940 | HTR1A     |
| rs10499890 | 7  | 85032278  | 0.1111 | 94.74% | 0.549700 | 0.366700 | 0.04316000 | 0.12440000 | NM_000840       | upstream   | 1078882 | Hs.590575 | GRM3      |
| rs10510777 | 3  | 55212778  | 0.4167 | 94.74% | 0.133200 | 0.345500 | 0.04317000 | 0.03247000 | NM_018398       | downstream | 129156  | Hs.656687 | CACNA2D3  |
| rs4851004  | 2  | 102375969 | 0.4321 | 92.98% | 0.017540 | 0.045780 | 0.04318000 | 0.36690000 | NM_003855       | intron     | 0       | Hs.469521 | IL18R1    |
| rs9315305  | 13 | 34170349  | 0.2481 | 91.93% | 0.618800 | 0.848500 | 0.04318000 | 0.13200000 | NM_015678       | upstream   | 244107  | Hs.491172 | NBEA      |
| rs10510706 | 3  | 40075261  | 0.2636 | 96.49% | 0.217400 | 0.206400 | 0.04321000 | 0.22610000 | NM_015460       | intron     | 0       | Hs.594535 | MYRIP     |
| rs7596444  | 2  | 133474230 | 0.3981 | 94.74% | 0.611500 | 0.439900 | 0.04322000 | 0.09768000 | NM_207481       | intron     | 0       | Hs.537329 | NAP5      |
| rs2824432  | 21 | 17963050  | 0.1920 | 96.84% | 0.171500 | 0.268200 | 0.04323000 | 0.01341000 | NM_001012707    | upstream   | 37000   | ---       | C21orf114 |
| rs229271   | 14 | 30058777  | 0.2985 | 90.53% | 0.235500 | 0.861400 | 0.04326000 | 0.08286000 | NM_017769       | upstream   | 39351   | Hs.509008 | KIAA1333  |
| rs7300179  | 12 | 71809958  | 0.2260 | 87.72% | 0.017660 | 0.045330 | 0.04326000 | 0.04257000 | NM_013381       | downstream | 464270  | Hs.199814 | TRHDE     |
| rs6915203  | 6  | 147045441 | 0.2079 | 93.68% | 0.096310 | 0.297300 | 0.04327000 | 0.13710000 | ENST00000326929 | intron     | 0       | ---       | ---       |
| rs10497216 | 2  | 161296725 | 0.0903 | 97.19% | 0.143800 | 0.136500 | 0.04330000 | 0.12510000 | NM_002897       | upstream   | 238174  | Hs.470412 | RBMS1     |
| rs1872394  | 3  | 7655566   | 0.2572 | 97.54% | 0.271700 | 0.525000 | 0.04333000 | 0.10540000 | NM_181875       | intron     | 0       | ---       | GRM7      |
| rs795446   | 3  | 30776092  | 0.4219 | 94.39% | 0.382000 | 0.362600 | 0.04333000 | 0.01137000 | NM_207359       | intron     | 0       | Hs.657052 | GADL1     |
| rs10516063 | 5  | 168711427 | 0.0368 | 66.67% | 0.219900 | 0.272300 | 0.04334000 | 0.20290000 | NM_003062       | upstream   | 51136   | Hs.604116 | SLIT3     |
| rs763720   | 10 | 124252434 | 0.1716 | 94.04% | 0.522200 | 0.627000 | 0.04335000 | 0.04683000 | NM_002775       | intron     | 0       | Hs.501280 | HTRA1     |
| rs1990140  | 7  | 41042219  | 0.4182 | 94.39% | 0.380100 | 0.205400 | 0.04338000 | 0.04882000 | NM_002192       | downstream | 652907  | Hs.583348 | INHBA     |
| rs6738407  | 2  | 196851876 | 0.1753 | 95.09% | 0.832900 | 1.000000 | 0.04338000 | 0.22910000 | NM_020760       | intron     | 0       | Hs.654742 | HECW2     |
| rs984040   | 6  | 126062970 | 0.4451 | 92.63% | 0.533300 | 0.761200 | 0.04338000 | 0.03425000 | NM_012259       | upstream   | 49449   | Hs.144287 | HEY2      |
| rs10507742 | 13 | 66646843  | 0.1321 | 92.98% | 0.789400 | 0.127400 | 0.04342000 | 0.09167000 | NM_020403       | intron     | 0       | Hs.654709 | PCDH9     |
| rs10492347 | 12 | 89527027  | 0.0896 | 97.89% | 0.144000 | 0.232800 | 0.04345000 | 0.01093000 | ENST00000359455 | upstream   | 329537  | ---       | ---       |
| rs3849439  | 3  | 96323133  | 0.0759 | 94.74% | 0.185700 | 0.443400 | 0.04345000 | 0.08657000 | ENST00000332119 | upstream   | 183575  | ---       | ---       |
| rs6727029  | 2  | 75625412  | 0.0896 | 97.89% | 0.708800 | 0.698700 | 0.04345000 | 0.01368000 | NM_032181       | intron     | 0       | Hs.302346 | TMEM166   |
| rs845006   | 21 | 32953727  | 0.0436 | 76.49% | 0.336200 | 0.392000 | 0.04347000 | 0.11310000 | NM_203446       | intron     | 0       | Hs.473632 | SYNJ1     |
| rs2043555  | 10 | 52729605  | 0.4436 | 93.33% | 0.171900 | 0.041770 | 0.04348000 | 0.14220000 | NM_006258       | intron     | 0       | Hs.654556 | PRKG1     |
| rs10486336 | 7  | 19172961  | 0.2828 | 93.68% | 0.228200 | 0.112800 | 0.04351000 | 0.33980000 | NM_152898       | upstream   | 21451   | Hs.592168 | FERD3L    |
| rs10518439 | 4  | 125837632 | 0.0909 | 96.49% | 0.057450 | 0.600200 | 0.04351000 | 0.04108000 | NM_020337       | intron     | 0       | Hs.480694 | ANKRD50   |
| rs9302644  | 16 | 71629089  | 0.1942 | 97.54% | 0.338500 | 0.054740 | 0.04352000 | 0.11480000 | NM_006885       | intron     | 0       | Hs.652666 | ZFHX3     |
| rs10495071 | 1  | 215958401 | 0.1259 | 94.74% | 0.003656 | 0.090900 | 0.04353000 | 0.04712000 | NM_138796       | intron     | 0       | Hs.171130 | SPATA17   |
| rs1072746  | 5  | 43646445  | 0.4151 | 95.09% | 0.044910 | 0.049570 | 0.04353000 | 0.03189000 | NM_182977       | intron     | 0       | Hs.482043 | NNT       |
| rs434193   | 4  | 86472513  | 0.1925 | 88.42% | 0.153900 | 0.361200 | 0.04353000 | 0.05080000 | NM_001042669    | upstream   | 597937  | Hs.444229 | ARHGAP24  |
| rs1143770  | 11 | 121522808 | 0.3509 | 92.98% | 0.893500 | 0.224000 | 0.04354000 | 0.09085000 | ENST00000362105 | upstream   | 285     | ---       | ---       |
| rs7025261  | 9  | 120112360 | 0.2519 | 90.53% | 0.408600 | 1.000000 | 0.04354000 | 0.34690000 | NM_014618       | downstream | 856369  | Hs.532316 | DBC1      |
| rs6709784  | 2  | 167495240 | 0.2618 | 96.49% | 0.211500 | 0.464100 | 0.04356000 | 0.09328000 | ENST00000328983 | intron     | 0       | ---       | ---       |
| rs1899358  | 6  | 165511172 | 0.2095 | 84.56% | 0.176800 | 0.193100 | 0.04357000 | 0.03589000 | NM_144980       | downstream | 101984  | Hs.144734 | C6orf118  |
| rs1509478  | 18 | 59315112  | 0.4671 | 90.53% | 1.000000 | 0.752400 | 0.04358000 | 0.01732000 | NM_002639       | intron     | 0       | Hs.55279  | SERPINB5  |
| rs666762   | 10 | 113634574 | 0.0524 | 93.68% | 0.526100 | 0.547300 | 0.04359000 | 0.02809000 | NM_020918       | downstream | 265040  | Hs.42586  | GPAM      |
| rs718702   | 12 | 57021546  | 0.1591 | 92.63% | 0.495000 | 1.000000 | 0.04359000 | 0.04423000 | NM_153377       | downstream | 530659  | Hs.253736 | LRIG3     |
| rs1985652  | 1  | 115587931 | 0.4620 | 92.28% | 0.106300 | 0.129000 | 0.04360000 | 0.02800000 | NM_002506       | downstream | 42129   | Hs.2561   | NGFB      |
| rs10483931 | 14 | 79217351  | 0.0251 | 97.89% | 0.153900 | 1.000000 | 0.04361000 | 0.05112000 | NM_138970       | intron     | 0       | Hs.368307 | NRXN3     |
| rs2983499  | 6  | 165953840 | 0.0251 | 97.89% | 1.000000 | 1.000000 | 0.04361000 | 0.07072000 | NM_006661       | intron     | 0       | Hs.584856 | PDE10A    |
| rs1006212  | 2  | 224338947 | 0.1897 | 88.77% | 0.837800 | 0.573900 | 0.04362000 | 0.23160000 | NM_001039569    | intron     | 0       | Hs.632555 | APIS3     |
| rs10503806 | 8  | 26938920  | 0.0564 | 90.18% | 0.566900 | 1.000000 | 0.04362000 | 0.05585000 | NM_033304       | upstream   | 160317  | Hs.654357 | ADRA1A    |
| rs8182037  | 15 | 73921656  | 0.2425 | 93.33% | 0.407900 | 1.000000 | 0.04363000 | 0.08078000 | NM_173469       | upstream   | 1199    | Hs.23033  | UBE2Q2    |
| rs997229   | 6  | 101143434 | 0.3858 | 89.12% | 0.895000 | 1.000000 | 0.04363000 | 0.00538900 | NM_006828       | intron     | 0       | Hs.486031 | ASCC3     |
| rs1439162  | 8  | 35599896  | 0.0509 | 96.49% | 0.145500 | 0.155300 | 0.04365000 | 0.05685000 | NM_080872       | intron     | 0       | Hs.238889 | UNC5D     |
| rs4271550  | 15 | 43723558  | 0.4182 | 94.39% | 0.012480 | 0.026280 | 0.04366000 | 0.08153000 | NM_021199       | intron     | 0       | Hs.511251 | SQRDL     |
| rs10508935 | 10 | 52536509  | 0.2815 | 94.74% | 0.132100 | 0.045680 | 0.04367000 | 0.34210000 | NM_006258       | intron     | 0       | Hs.654556 | PRKG1     |
| rs722367   | 3  | 4730956   | 0.1259 | 96.14% | 0.022340 | 0.069920 | 0.04367000 | 0.05527000 | NM_002222       | intron     | 0       | Hs.699169 | ITPR1     |
| rs279091   | 5  | 100099358 | 0.1278 | 94.74% | 0.407800 | 0.401200 | 0.04370000 | 0.09086000 | NM_175052       | downstream | 73898   | Hs.308628 | ST8SIA4   |
| rs726039   | 13 | 103947454 | 0.0259 | 94.74% | 1.000000 | 1.000000 | 0.04370000 | 0.01637000 | NM_172370       | upstream   | 969139  | Hs.381382 | DAOA      |
| rs10490256 | 2  | 40636555  | 0.1105 | 93.68% | 0.340600 | 0.498400 | 0.04371000 | 0.03422000 | NM_021097       | upstream   | 102367  | Hs.468274 | SLC8A1    |
| rs9318007  | 13 | 70773135  | 0.3745 | 96.49% | 0.370100 | 0.875800 | 0.04371000 | 0.18420000 | NM_004392       | downstream | 136964  | Hs.129452 | DACH1     |
| rs7541392  | 1  | 201006518 | 0.1574 | 82.46% | 0.005023 | 0.005056 | 0.04373000 | 0.29350000 | NM_006618       | intron     | 0       | Hs.443650 | JARID1B   |

|            |    |           |        |        |          |          |            |            |                 |            |        |           |         |
|------------|----|-----------|--------|--------|----------|----------|------------|------------|-----------------|------------|--------|-----------|---------|
| rs10488170 | 7  | 132976542 | 0.4185 | 94.74% | 0.900500 | 0.430800 | 0.04374000 | 0.06298000 | NM_001037126    | intron     | 0      | Hs.321273 | EXOC4   |
| rs10488821 | 11 | 30458751  | 0.3087 | 97.19% | 0.778800 | 0.579400 | 0.04375000 | 0.01580000 | NM_001584       | intron     | 0      | Hs.289795 | MPPED2  |
| rs4551866  | 13 | 25045654  | 0.1861 | 63.16% | 1.000000 | 0.791300 | 0.04376000 | 0.09634000 | NM_016529       | intron     | 0      | Hs.444957 | ATP8A2  |
| rs606443   | 12 | 119395013 | 0.4844 | 90.18% | 0.060860 | 0.120300 | 0.04376000 | 0.05461000 | NM_003769       | upstream   | 3072   | Hs.700688 | SFRS9   |
| rs1014095  | 7  | 148094793 | 0.2091 | 92.28% | 0.455800 | 0.671100 | 0.04380000 | 0.03248000 | NM_003592       | intron     | 0      | Hs.146806 | CUL1    |
| rs6909559  | 6  | 149293111 | 0.3047 | 97.89% | 0.396800 | 0.319100 | 0.04381000 | 0.22990000 | NM_005715       | intron     | 0      | Hs.657370 | UST     |
| rs6940841  | 6  | 149291239 | 0.3047 | 97.89% | 0.396800 | 0.319100 | 0.04381000 | 0.22990000 | NM_005715       | intron     | 0      | Hs.657370 | UST     |
| rs9320161  | 6  | 106957981 | 0.3849 | 88.42% | 0.002156 | 0.003637 | 0.04381000 | 0.02096000 | NM_004849       | upstream   | 77622  | Hs.486063 | ATG5    |
| rs1110183  | 9  | 38446365  | 0.2004 | 88.42% | 0.323500 | 0.129200 | 0.04382000 | 0.02313000 | NM_001007563    | upstream   | 31921  | Hs.349705 | IGFBPL1 |
| rs7245218  | 18 | 49529525  | 0.4924 | 92.63% | 0.461800 | 0.447000 | 0.04384000 | 0.15020000 | NM_005215       | downstream | 218504 | Hs.579550 | DCC     |
| rs220799   | 6  | 165723490 | 0.3339 | 95.09% | 0.587200 | 0.723900 | 0.04385000 | 0.04963000 | NM_006661       | intron     | 0      | Hs.584856 | PDE10A  |
| rs10509713 | 10 | 99105699  | 0.0513 | 95.79% | 1.000000 | 1.000000 | 0.04386000 | 0.13550000 | NM_015179       | downstream | 749    | Hs.434251 | RRP12   |
| rs54566    | 14 | 79705600  | 0.1062 | 95.79% | 0.521600 | 0.739300 | 0.04386000 | 0.05076000 | NM_001007023    | downstream | 30995  | Hs.202354 | DIO2    |
| rs10483156 | 22 | 28599773  | 0.3232 | 63.51% | 0.003536 | 0.043590 | 0.04387000 | 0.01181000 | NM_021090       | upstream   | 9426   | Hs.474536 | MTMR3   |
| rs10501820 | 11 | 94513456  | 0.0414 | 97.54% | 1.000000 | 1.000000 | 0.04387000 | 0.03037000 | NM_144665       | downstream | 32325  | Hs.659934 | SESN3   |
| rs7020632  | 9  | 31605237  | 0.4342 | 85.26% | 0.001668 | 0.003832 | 0.04388000 | 0.17940000 | ENST00000360120 | downstream | 360979 | ---       | ---     |
| rs10493788 | 1  | 86254922  | 0.1143 | 90.53% | 0.000008 | 0.000068 | 0.04389000 | 0.24620000 | NM_152890       | intron     | 0      | Hs.659516 | COL24A1 |
| rs139954   | 22 | 35179861  | 0.0418 | 96.49% | 0.381100 | 1.000000 | 0.04391000 | 0.02316000 | ENST00000381877 | intron     | 0      | ---       | ---     |
| rs10516565 | 4  | 112377171 | 0.3755 | 97.19% | 0.307500 | 0.280000 | 0.04394000 | 0.04225000 | NM_000325       | upstream   | 613468 | Hs.643588 | PITX2   |
| rs1847118  | 4  | 40185760  | 0.4291 | 94.04% | 0.708600 | 0.875700 | 0.04395000 | 0.12840000 | NM_019027       | intron     | 0      | Hs.518727 | RBM47   |
| rs949636   | 10 | 23741106  | 0.2048 | 95.09% | 0.134900 | 0.398500 | 0.04396000 | 0.03483000 | ENST00000386792 | upstream   | 12572  | ---       | ---     |
| rs7910052  | 10 | 19739010  | 0.3787 | 95.44% | 0.441000 | 0.616600 | 0.04399000 | 0.12020000 | ENST00000377265 | upstream   | 88412  | ---       | ---     |
| rs9357639  | 6  | 50038173  | 0.3023 | 90.53% | 1.000000 | 0.242700 | 0.04399000 | 0.17180000 | NM_001037499    | intron     | 0      | Hs.381372 | DEFB114 |
| rs1003986  | 3  | 85953053  | 0.2444 | 94.04% | 0.408000 | 0.186900 | 0.04400000 | 0.22150000 | NM_153184       | intron     | 0      | Hs.164578 | CADM2   |
| rs10510800 | 3  | 58930912  | 0.0055 | 95.09% | 1.000000 | 1.000000 | 0.04400000 | 0.99870000 | NM_198463       | intron     | 0      | Hs.368434 | C3orf67 |
| rs362620   | 20 | 10262383  | 0.1863 | 92.28% | 0.306600 | 0.257900 | 0.04400000 | 0.19740000 | NM_130811       | downstream | 26318  | Hs.167317 | SNAP25  |
| rs966287   | 18 | 27580619  | 0.2673 | 96.49% | 0.285200 | 0.371600 | 0.04400000 | 0.05455000 | ENST00000269205 | downstream | 13110  | ---       | ---     |
| rs10513506 | 9  | 130838960 | 0.2439 | 86.32% | 0.391600 | 0.494900 | 0.04401000 | 0.05179000 | ENST00000277475 | intron     | 0      | ---       | ---     |
| rs950214   | 10 | 64337410  | 0.2230 | 97.54% | 0.728800 | 1.000000 | 0.04404000 | 0.04191000 | NM_000399       | upstream   | 91277  | Hs.1395   | EGR2    |
| rs952435   | 19 | 5622821   | 0.1909 | 89.12% | 1.000000 | 0.498700 | 0.04405000 | 0.05107000 | NM_002967       | downstream | 3333   | Hs.23978  | SAFB    |
| rs1974584  | 4  | 10166959  | 0.3383 | 94.39% | 0.342100 | 0.144500 | 0.04406000 | 0.06728000 | NM_052964       | intron     | 0      | Hs.678910 | MIST    |
| rs2619541  | 6  | 15731919  | 0.1065 | 97.19% | 0.528500 | 0.490700 | 0.04406000 | 0.11450000 | NM_183041       | intron     | 0      | Hs.571148 | DTNBP1  |
| rs321989   | 7  | 78133650  | 0.1032 | 88.42% | 1.000000 | 1.000000 | 0.04407000 | 0.07481000 | NM_012301       | intron     | 0      | Hs.654788 | MAGI2   |
| rs9320189  | 6  | 107285235 | 0.4773 | 92.63% | 0.901800 | 0.441400 | 0.04407000 | 0.09027000 | NM_018292       | downstream | 62250  | Hs.406917 | QRSL1   |
| rs10508931 | 10 | 52023961  | 0.1081 | 95.79% | 0.337000 | 0.315400 | 0.04408000 | 0.15540000 | NM_147156       | intron     | 0      | Hs.654698 | SGMS1   |
| rs6935311  | 6  | 134952731 | 0.3023 | 90.53% | 0.767700 | 1.000000 | 0.04408000 | 0.02714000 | NM_005627       | upstream   | 415051 | Hs.510078 | SGK1    |
| rs7699779  | 4  | 79736581  | 0.0060 | 88.07% | 0.005988 | 1.000000 | 0.04410000 | 0.99870000 | NM_005139       | intron     | 0      | Hs.480042 | ANXA3   |
| rs10509242 | 10 | 67348809  | 0.0502 | 97.89% | 0.509800 | 0.529800 | 0.04412000 | 0.04094000 | NM_013266       | downstream | 916    | Hs.660362 | CTNNA3  |
| rs1960118  | 4  | 42378409  | 0.0502 | 97.89% | 0.509800 | 0.529800 | 0.04412000 | 0.23190000 | NM_006095       | upstream   | 24750  | Hs.435052 | ATP8A1  |
| rs61875    | 6  | 86912251  | 0.0502 | 97.89% | 1.000000 | 1.000000 | 0.04412000 | 0.02272000 | ENST00000257777 | downstream | 68433  | ---       | ---     |
| rs9311896  | 3  | 64514815  | 0.0502 | 97.89% | 1.000000 | 1.000000 | 0.04412000 | 0.03905000 | NM_182920       | intron     | 0      | Hs.656071 | ADAMTS9 |
| rs10487933 | 7  | 6033769   | 0.2093 | 94.74% | 0.460700 | 0.614600 | 0.04416000 | 0.00810200 | NM_014413       | intron     | 0      | Hs.520205 | EIF2AK1 |
| rs2866382  | 4  | 102609326 | 0.0380 | 87.72% | 1.000000 | 1.000000 | 0.04417000 | 0.05952000 | NM_000944       | upstream   | 121950 | Hs.435512 | PPP3CA  |
| rs4131769  | 12 | 49238289  | 0.3098 | 96.84% | 0.888400 | 1.000000 | 0.04417000 | 0.07126000 | NM_173602       | intron     | 0      | Hs.505516 | DIP2B   |
| rs7083302  | 10 | 19162022  | 0.4951 | 71.93% | 0.068940 | 0.172800 | 0.04417000 | 0.16300000 | NM_178815       | downstream | 155076 | Hs.25362  | ARL5B   |
| rs2466830  | 17 | 28226096  | 0.3668 | 90.88% | 1.000000 | 0.388500 | 0.04421000 | 0.10370000 | NM_015194       | intron     | 0      | Hs.658000 | MYO1D   |
| rs1538352  | 1  | 109106525 | 0.1032 | 88.42% | 0.033470 | 0.076810 | 0.04422000 | 0.15460000 | NM_007269       | intron     | 0      | Hs.530436 | TXBP3   |
| rs10495659 | 2  | 17167437  | 0.2072 | 92.28% | 1.000000 | 0.603900 | 0.04423000 | 0.36770000 | ENST00000388051 | downstream | 242    | ---       | ---     |
| rs10508187 | 13 | 107191904 | 0.0511 | 96.14% | 1.000000 | 1.000000 | 0.04424000 | 0.10430000 | ENST00000375915 | intron     | 0      | ---       | ---     |
| rs1038062  | 8  | 4489894   | 0.2143 | 90.88% | 0.196200 | 0.141800 | 0.04430000 | 0.13460000 | ENST00000383934 | downstream | 483315 | ---       | ---     |
| rs586284   | 9  | 27142977  | 0.2407 | 94.04% | 0.503600 | 0.259100 | 0.04431000 | 0.05713000 | NM_000459       | intron     | 0      | Hs.89640  | TEK     |
| rs7258628  | 19 | 35860761  | 0.0944 | 94.74% | 0.071580 | 0.010100 | 0.04431000 | 0.29460000 | NM_014717       | downstream | 119956 | Hs.378901 | ZNF536  |
| rs934837   | 3  | 62688009  | 0.0566 | 89.82% | 0.568400 | 0.244600 | 0.04431000 | 0.05325000 | NM_183393       | intron     | 0      | Hs.654933 | CADPS   |
| rs10493406 | 1  | 66730967  | 0.1467 | 96.84% | 0.811700 | 0.481500 | 0.04432000 | 0.03142000 | NM_032291       | upstream   | 41586  | Hs.132121 | SGIP1   |

|            |    |           |        |        |          |          |            |            |                 |            |         |           |           |
|------------|----|-----------|--------|--------|----------|----------|------------|------------|-----------------|------------|---------|-----------|-----------|
| rs724177   | 10 | 14691056  | 0.2608 | 97.54% | 0.276500 | 0.100100 | 0.04432000 | 0.04944000 | NM_031453       | intron     | 0       | Hs.446315 | FAM107B   |
| rs1375199  | 2  | 33674902  | 0.2011 | 95.09% | 1.000000 | 0.829400 | 0.04433000 | 0.09814000 | NM_015475       | intron     | 0       | Hs.468140 | FAM98A    |
| rs10494399 | 1  | 162081957 | 0.0415 | 97.19% | 0.000481 | 0.121800 | 0.04435000 | 0.02057000 | ENST00000385701 | upstream   | 77574   | ---       | ---       |
| rs7046513  | 9  | 104439252 | 0.2417 | 95.09% | 0.319200 | 0.254400 | 0.04436000 | 0.05965000 | ENST00000374800 | intron     | 0       | ---       | ---       |
| rs10487637 | 7  | 143932280 | 0.0505 | 97.19% | 0.512400 | 0.532000 | 0.04438000 | 0.12930000 | NM_022445       | intron     | 0       | Hs.660232 | TPK1      |
| rs10505445 | 8  | 125662775 | 0.4738 | 93.68% | 0.539600 | 0.650900 | 0.04440000 | 0.02544000 | NM_014751       | intron     | 0       | Hs.336994 | MTSS1     |
| rs10505850 | 12 | 19802620  | 0.3370 | 94.74% | 0.223300 | 0.035180 | 0.04440000 | 0.04722000 | NM_000921       | upstream   | 610866  | Hs.591150 | PDE3A     |
| rs2830399  | 21 | 26986248  | 0.1000 | 91.23% | 0.029040 | 0.018520 | 0.04440000 | 0.13570000 | NM_052954       | upstream   | 118796  | Hs.37445  | CYR1      |
| rs10490538 | 2  | 191298311 | 0.2399 | 95.09% | 0.738800 | 0.850200 | 0.04441000 | 0.04520000 | NM_005966       | downstream | 32577   | Hs.570078 | NAB1      |
| rs10518420 | 1  | 73633131  | 0.0420 | 96.14% | 0.382200 | 1.000000 | 0.04441000 | 0.14210000 | ENST00000388295 | upstream   | 203003  | ---       | ---       |
| rs3217824  | 12 | 4261593   | 0.0055 | 95.79% | 0.005505 | 1.000000 | 0.04441000 | 0.99920000 | NM_001759       | intron     | 0       | Hs.376071 | CCND2     |
| rs722359   | 6  | 117899571 | 0.1964 | 96.49% | 0.568700 | 0.519700 | 0.04443000 | 0.02486000 | NM_173674       | upstream   | 10942   | Hs.658304 | DCBLD1    |
| rs7719358  | 5  | 136366264 | 0.1667 | 87.37% | 0.647000 | 1.000000 | 0.04443000 | 0.04740000 | NM_004598       | intron     | 0       | Hs.654695 | SPOCK1    |
| rs555906   | 11 | 97458358  | 0.3528 | 92.98% | 1.000000 | 0.729900 | 0.04444000 | 0.06236000 | ENST00000384812 | downstream | 169259  | ---       | ---       |
| rs10500142 | 7  | 144262265 | 0.1273 | 96.49% | 0.784400 | 0.770400 | 0.04445000 | 0.08733000 | ENST00000363803 | upstream   | 84155   | ---       | ---       |
| rs277886   | 16 | 25070005  | 0.3728 | 97.89% | 0.608400 | 0.317700 | 0.04447000 | 0.00418500 | NM_001032391    | intron     | 0       | Hs.337730 | LCMT1     |
| rs618701   | 1  | 63489839  | 0.4403 | 94.04% | 0.804700 | 0.649700 | 0.04448000 | 0.04485000 | NM_012183       | upstream   | 71461   | Hs.546573 | FOXD3     |
| rs10517333 | 4  | 34525359  | 0.1734 | 96.14% | 0.406600 | 0.551300 | 0.04449000 | 0.09206000 | NM_032457       | downstream | 3771790 | Hs.570785 | PCDH7     |
| rs571361   | 1  | 81899114  | 0.4317 | 95.09% | 0.387900 | 0.291000 | 0.04449000 | 0.25670000 | ENST00000370721 | intron     | 0       | ---       | ---       |
| rs1258470  | 11 | 34685841  | 0.3700 | 97.19% | 0.897500 | 0.876300 | 0.04452000 | 0.13940000 | NM_012153       | downstream | 46184   | Hs.653859 | EHF       |
| rs1565924  | 4  | 11120550  | 0.3822 | 96.84% | 0.702300 | 0.870100 | 0.04453000 | 0.12660000 | NM_005114       | upstream   | 80063   | Hs.507348 | HS3ST1    |
| rs10506295 | 12 | 49371738  | 0.3105 | 97.19% | 0.778800 | 1.000000 | 0.04454000 | 0.04669000 | NM_173602       | intron     | 0       | Hs.505516 | DIP2B     |
| rs1372469  | 4  | 46100211  | 0.0535 | 95.09% | 1.000000 | 1.000000 | 0.04454000 | 0.00618300 | NM_000807       | upstream   | 13509   | Hs.116250 | GABRA2    |
| rs9296984  | 6  | 15697285  | 0.0989 | 92.28% | 0.296200 | 0.265100 | 0.04454000 | 0.13380000 | NM_183041       | intron     | 0       | Hs.571148 | DTNBP1    |
| rs951954   | 2  | 109816794 | 0.0256 | 95.79% | 1.000000 | 1.000000 | 0.04455000 | 0.01371000 | NM_023016       | downstream | 82942   | Hs.355455 | ANKRD57   |
| rs2027148  | 13 | 79302300  | 0.2000 | 85.96% | 0.228600 | 0.495700 | 0.04457000 | 0.08820000 | NM_019080       | downstream | 276078  | Hs.525093 | NDIFP2    |
| rs10508760 | 10 | 31603466  | 0.0485 | 68.77% | 0.000000 | 0.000000 | 0.04459000 | 0.29990000 | NM_030751       | upstream   | 44666   | Hs.124503 | ZEB1      |
| rs7147624  | 14 | 64935378  | 0.1798 | 93.68% | 0.836700 | 0.815000 | 0.04459000 | 0.03122000 | NM_178157       | upstream   | 13910   | Hs.654961 | FUT8      |
| rs7336352  | 13 | 43013099  | 0.4607 | 93.68% | 0.805300 | 0.760000 | 0.04459000 | 0.08604000 | NM_017993       | intron     | 0       | Hs.128258 | ENOX1     |
| rs2349576  | 5  | 152618231 | 0.1142 | 93.68% | 1.000000 | 1.000000 | 0.04460000 | 0.02008000 | NM_000827       | upstream   | 232268  | Hs.519693 | GRIA1     |
| rs150951   | 14 | 69605628  | 0.0523 | 97.19% | 0.538400 | 0.564300 | 0.04464000 | 0.03097000 | NM_182936       | intron     | 0       | Hs.337696 | SLC8A3    |
| rs4799483  | 18 | 34403672  | 0.0523 | 97.19% | 0.538400 | 0.564300 | 0.04464000 | 0.01754000 | NM_020180       | upstream   | 1003731 | Hs.435976 | BRUNOL4   |
| rs2791790  | 6  | 102471860 | 0.0537 | 94.74% | 0.548000 | 0.570900 | 0.04466000 | 0.00924000 | NM_175768       | intron     | 0       | Hs.654523 | GRIK2     |
| rs9294097  | 6  | 78877951  | 0.4513 | 93.68% | 0.387600 | 1.000000 | 0.04471000 | 0.05044000 | NM_001010844    | upstream   | 755957  | Hs.656212 | IRAK1BP1  |
| rs10503432 | 8  | 12970627  | 0.0054 | 97.54% | 1.000000 | 1.000000 | 0.04472000 | 0.99870000 | NM_024767       | downstream | 145830  | Hs.134296 | DLC1      |
| rs10504753 | 8  | 83410374  | 0.0054 | 97.54% | 1.000000 | 1.000000 | 0.04472000 | 0.99880000 | NM_152837       | upstream   | 493384  | Hs.492121 | SNX16     |
| rs1335310  | 10 | 2074135   | 0.4614 | 77.19% | 0.001088 | 0.001555 | 0.04472000 | 0.03315000 | NM_018702       | upstream   | 304465  | Hs.657984 | ADARB2    |
| rs352132   | 18 | 48085095  | 0.0569 | 89.47% | 0.569900 | 0.591600 | 0.04473000 | 0.00635200 | NM_005215       | upstream   | 36061   | Hs.579550 | DCC       |
| rs2246086  | 6  | 102472246 | 0.0520 | 97.89% | 0.535700 | 0.562100 | 0.04474000 | 0.00826400 | NM_175768       | intron     | 0       | Hs.654523 | GRIK2     |
| rs2791791  | 6  | 102472131 | 0.0520 | 97.89% | 0.535700 | 0.562100 | 0.04474000 | 0.00826400 | NM_175768       | intron     | 0       | Hs.654523 | GRIK2     |
| rs10485734 | 20 | 9573787   | 0.1942 | 97.54% | 0.443500 | 0.420500 | 0.04475000 | 0.01577000 | NM_177990       | intron     | 0       | Hs.32539  | PAK7      |
| rs10493184 | 1  | 56101529  | 0.1205 | 78.60% | 0.749800 | 1.000000 | 0.04477000 | 0.02906000 | NM_207465       | downstream | 131149  | ---       | ---       |
| rs724858   | 4  | 6722860   | 0.4425 | 70.18% | 0.000002 | 0.001621 | 0.04477000 | 0.08490000 | NM_033296       | downstream | 27503   | Hs.705528 | MRFAP1    |
| rs2038478  | 1  | 116536020 | 0.3027 | 91.58% | 0.883700 | 0.567300 | 0.04479000 | 0.03816000 | NM_152367       | downstream | 56636   | Hs.376194 | C1orf161  |
| rs847331   | 14 | 71898828  | 0.1892 | 88.07% | 0.147200 | 0.769800 | 0.04480000 | 0.06844000 | NM_004296       | intron     | 0       | Hs.509872 | RG56      |
| rs9284682  | 4  | 147294757 | 0.0167 | 73.33% | 0.049750 | 1.000000 | 0.04480000 | 0.11900000 | NM_007080       | upstream   | 21574   | Hs.190520 | LSM6      |
| rs10502904 | 18 | 45704096  | 0.0527 | 96.49% | 0.030490 | 1.000000 | 0.04481000 | 0.16540000 | ENST00000285039 | intron     | 0       | ---       | ---       |
| rs3117638  | 9  | 27168697  | 0.1000 | 91.23% | 0.728600 | 1.000000 | 0.04485000 | 0.01731000 | NM_000459       | intron     | 0       | Hs.89640  | TEK       |
| rs2197815  | 4  | 111786326 | 0.0636 | 96.49% | 1.000000 | 1.000000 | 0.04487000 | 0.04570000 | NM_000325       | upstream   | 22623   | Hs.643588 | PITX2     |
| rs998206   | 3  | 81804701  | 0.1201 | 89.12% | 0.144200 | 0.372600 | 0.04487000 | 0.03050000 | NM_000158       | intron     | 0       | Hs.436062 | GBE1      |
| rs1476946  | 9  | 112904570 | 0.3439 | 94.39% | 0.225000 | 0.424300 | 0.04489000 | 0.42380000 | NM_205859       | downstream | 225014  | Hs.381312 | OR2K2     |
| rs10490697 | 2  | 105924977 | 0.1079 | 97.54% | 0.340400 | 0.499200 | 0.04490000 | 0.01877000 | NM_001004722    | downstream | 47840   | Hs.705602 | NCK2      |
| rs1381100  | 20 | 58273271  | 0.2854 | 94.04% | 0.368600 | 0.727800 | 0.04490000 | 0.04824000 | NM_173644       | downstream | 191868  | Hs.335319 | C20orf197 |
| rs2200014  | 8  | 79118949  | 0.4391 | 95.09% | 0.387800 | 0.440400 | 0.04490000 | 0.11410000 | NM_000318       | upstream   | 1044042 | Hs.437966 | PXMP3     |



|            |    |           |        |        |          |          |            |            |                 |            |         |           |           |
|------------|----|-----------|--------|--------|----------|----------|------------|------------|-----------------|------------|---------|-----------|-----------|
| rs1477545  | 4  | 67736481  | 0.0796 | 94.74% | 0.227800 | 0.501000 | 0.04491000 | 0.07785000 | ENST00000383902 | downstream | 241424  | ---       | ---       |
| rs1913419  | 4  | 12530692  | 0.3145 | 89.82% | 0.309900 | 0.174700 | 0.04491000 | 0.14440000 | ENST00000382444 | upstream   | 413444  | ---       | ---       |
| rs10494257 | 1  | 145721193 | 0.1462 | 97.19% | 0.332700 | 0.289500 | 0.04493000 | 0.14420000 | NM_181703       | upstream   | 9127    | Hs.447968 | GIA5      |
| rs10509960 | 10 | 114065482 | 0.1462 | 97.19% | 0.811900 | 0.789300 | 0.04493000 | 0.28880000 | NM_058222       | downstream | 12422   | Hs.348615 | TECTB     |
| rs10511549 | 9  | 10538235  | 0.2398 | 94.39% | 0.030240 | 0.166900 | 0.04494000 | 0.31530000 | ENST00000363183 | downstream | 1105883 | ---       | ---       |
| rs1871071  | 10 | 54669520  | 0.3358 | 95.09% | 0.892200 | 0.601400 | 0.04495000 | 0.15120000 | ENST00000387222 | upstream   | 218434  | ---       | ---       |
| rs9311976  | 3  | 7097638   | 0.3358 | 95.09% | 0.222500 | 0.076290 | 0.04495000 | 0.12480000 | NM_181874       | intron     | 0       | Hs.660131 | GRM7      |
| rs3767237  | 1  | 20972278  | 0.0755 | 97.54% | 0.193900 | 0.173700 | 0.04497000 | 0.07072000 | NM_016287       | intron     | 0       | Hs.142442 | HP1BP3    |
| rs4783361  | 16 | 22128305  | 0.1727 | 87.37% | 0.376200 | 0.625300 | 0.04499000 | 0.05643000 | NM_013302       | intron     | 0       | Hs.498892 | EEF2K     |
| rs10511297 | 3  | 112685490 | 0.1061 | 97.54% | 0.527300 | 0.488600 | 0.04501000 | 0.05473000 | NM_005816       | upstream   | 58056   | Hs.142023 | CD96      |
| rs1115558  | 7  | 68123432  | 0.1254 | 97.89% | 0.591200 | 0.698300 | 0.04501000 | 0.02683000 | ENST00000388535 | upstream   | 41870   | ---       | ---       |
| rs1414798  | 9  | 26799022  | 0.1254 | 97.89% | 0.783000 | 1.000000 | 0.04501000 | 0.20350000 | NM_024828       | downstream | 31661   | Hs.178357 | C9orf82   |
| rs1829515  | 3  | 185087417 | 0.1697 | 97.19% | 0.285200 | 0.239300 | 0.04502000 | 0.14240000 | NM_001037639    | upstream   | 2047    | Hs.478469 | PARL      |
| rs10492673 | 13 | 87464048  | 0.3112 | 97.54% | 0.050250 | 0.461000 | 0.04508000 | 0.08955000 | NM_015567       | downstream | 334176  | Hs.591208 | SLITRK5   |
| rs10517861 | 4  | 64167920  | 0.1911 | 90.88% | 0.840700 | 0.653000 | 0.04508000 | 0.08627000 | NM_001010874    | downstream | 660465  | Hs.227752 | SRD5A2L2  |
| rs1963296  | 17 | 131110425 | 0.3112 | 97.54% | 0.779900 | 1.000000 | 0.04508000 | 0.04962000 | NM_006042       | downstream | 229306  | Hs.462270 | HS3ST3A1  |
| rs2022212  | 6  | 69588678  | 0.3112 | 97.54% | 0.888900 | 0.712400 | 0.04508000 | 0.04321000 | NM_001704       | intron     | 0       | Hs.13261  | BAI3      |
| rs492681   | 18 | 9853662   | 0.1069 | 96.84% | 1.000000 | 1.000000 | 0.04510000 | 0.23890000 | NM_006868       | downstream | 1115    | Hs.99528  | RAB31     |
| rs10500261 | 19 | 37719854  | 0.4943 | 91.93% | 1.000000 | 0.355600 | 0.04511000 | 0.02496000 | NM_004708       | upstream   | 44091   | Hs.443831 | PCDC5     |
| rs10496788 | 2  | 138225602 | 0.0646 | 95.09% | 0.086990 | 0.082720 | 0.04512000 | 0.08030000 | NM_001024075    | upstream   | 212676  | Hs.42151  | HNMT      |
| rs10491560 | 9  | 96884334  | 0.2000 | 96.49% | 0.259000 | 0.392800 | 0.04514000 | 0.13340000 | NM_032823       | intron     | 0       | Hs.434253 | C9orf3    |
| rs1349061  | 12 | 84753974  | 0.1338 | 94.39% | 1.000000 | 0.578400 | 0.04515000 | 0.31080000 | NM_005447       | upstream   | 30101   | Hs.527881 | PAMCI     |
| rs1501208  | 3  | 136386356 | 0.0356 | 93.68% | 1.000000 | 1.000000 | 0.04515000 | 0.14450000 | ENST00000360935 | intron     | 0       | ---       | ---       |
| rs10506068 | 12 | 30521940  | 0.1160 | 92.28% | 0.762100 | 1.000000 | 0.04516000 | 0.06178000 | NM_006390       | downstream | 151250  | Hs.505136 | IPO8      |
| rs1869070  | 2  | 105982008 | 0.3426 | 94.74% | 0.588600 | 1.000000 | 0.04518000 | 0.00585600 | NM_032411       | upstream   | 66537   | Hs.43125  | C2orf40   |
| rs10482862 | 21 | 15245706  | 0.1211 | 89.82% | 0.230900 | 0.339300 | 0.04520000 | 0.20730000 | NM_003489       | downstream | 13202   | Hs.155017 | NRIP1     |
| rs183436   | 21 | 42550900  | 0.3402 | 93.33% | 0.784700 | 0.626200 | 0.04520000 | 0.36150000 | NM_207630       | intron     | 0       | ---       | ABCG1     |
| rs10503431 | 8  | 12970291  | 0.0054 | 97.19% | 1.000000 | 1.000000 | 0.04521000 | 0.99870000 | NM_024767       | downstream | 146166  | Hs.134296 | DLC1      |
| rs10517532 | 4  | 61913826  | 0.0054 | 97.19% | 1.000000 | 1.000000 | 0.04521000 | 0.99870000 | ENST00000381217 | downstream | 61856   | ---       | ---       |
| rs2417869  | 9  | 110430205 | 0.3407 | 94.74% | 0.892300 | 0.379300 | 0.04524000 | 0.05888000 | NM_006686       | downstream | 226487  | Hs.534390 | ACTL7B    |
| rs1235012  | 8  | 4294524   | 0.0316 | 83.16% | 1.000000 | 1.000000 | 0.04527000 | 0.06393000 | ENST00000383934 | downstream | 678685  | ---       | ---       |
| rs17045807 | 2  | 54385935  | 0.1680 | 88.77% | 0.000000 | 0.000034 | 0.04528000 | 0.10590000 | NM_138448       | downstream | 158     | Hs.516173 | ACYP2     |
| rs10508374 | 10 | 9028079   | 0.0753 | 97.89% | 0.380900 | 0.368500 | 0.04532000 | 0.12980000 | NM_001013656    | upstream   | 461012  | ---       | LOC389936 |
| rs10509872 | 10 | 110232026 | 0.0753 | 97.89% | 1.000000 | 0.368500 | 0.04532000 | 0.14420000 | ENST00000388288 | downstream | 458795  | ---       | ---       |
| rs6578840  | 11 | 7245750   | 0.3810 | 88.42% | 0.690300 | 0.488700 | 0.04533000 | 0.01541000 | NM_175733       | intron     | 0       | Hs.177193 | SYT9      |
| rs10504857 | 8  | 89651741  | 0.1491 | 96.49% | 0.344800 | 0.425100 | 0.04534000 | 0.06581000 | NM_003821       | upstream   | 1187432 | Hs.103755 | RIPK2     |
| rs1392062  | 3  | 65671865  | 0.2671 | 97.19% | 0.758600 | 0.591900 | 0.04534000 | 0.05547000 | NM_001033057    | intron     | 0       | Hs.651939 | MAGI1     |
| rs665554   | 11 | 105339382 | 0.3593 | 92.28% | 0.789300 | 0.391100 | 0.04534000 | 0.09031000 | NM_000829       | intron     | 0       | Hs.503743 | GRIA4     |
| rs9315759  | 13 | 39616680  | 0.0769 | 95.79% | 1.000000 | 1.000000 | 0.04534000 | 0.01289000 | ENST00000384727 | upstream   | 82284   | ---       | ---       |
| rs10494635 | 1  | 188759982 | 0.1328 | 95.09% | 0.594400 | 1.000000 | 0.04535000 | 0.00514200 | NM_199051       | upstream   | 46600   | Hs.65765  | FAM5C     |
| rs7559023  | 2  | 40008348  | 0.1328 | 95.09% | 0.439500 | 0.260600 | 0.04535000 | 0.10240000 | NM_025264       | upstream   | 148437  | Hs.468254 | THUMPD2   |
| rs9313981  | 5  | 163193993 | 0.0414 | 97.54% | 1.000000 | 1.000000 | 0.04535000 | 0.12390000 | ENST00000385742 | upstream   | 38244   | ---       | ---       |
| rs10518389 | 4  | 122531523 | 0.3831 | 97.54% | 0.527000 | 0.745900 | 0.04539000 | 0.05819000 | NM_198179       | upstream   | 10271   | Hs.368977 | GPR103    |
| rs556585   | 1  | 232415025 | 0.1335 | 82.81% | 1.000000 | 0.696800 | 0.04539000 | 0.06235000 | NM_173508       | intron     | 0       | Hs.158748 | SLC35F3   |
| rs10519143 | 15 | 45842859  | 0.1703 | 80.35% | 0.000010 | 0.000126 | 0.04540000 | 0.13340000 | NM_024966       | intron     | 0       | Hs.511265 | SEMA6D    |
| rs10503123 | 18 | 64625503  | 0.3011 | 92.63% | 0.559300 | 0.172600 | 0.04544000 | 0.05297000 | NM_024781       | intron     | 0       | Hs.280781 | CCDC102B  |
| rs10514820 | 9  | 8005209   | 0.1585 | 92.98% | 0.819200 | 0.522200 | 0.04548000 | 0.07050000 | NM_033428       | upstream   | 215142  | Hs.7517   | C9orf123  |
| rs4652412  | 1  | 177778277 | 0.4244 | 95.09% | 0.025010 | 0.290000 | 0.04548000 | 0.02412000 | NM_182766       | intron     | 0       | Hs.658505 | C1orf125  |
| rs10499928 | 7  | 96222714  | 0.4407 | 94.74% | 0.538000 | 0.755700 | 0.04549000 | 0.08115000 | NM_006304       | upstream   | 45575   | Hs.489201 | SHFM1     |
| rs1961969  | 7  | 18060812  | 0.2119 | 94.39% | 0.467500 | 0.099250 | 0.04551000 | 0.02682000 | NM_175886       | upstream   | 26885   | Hs.169284 | PRPS1L1   |
| rs10506534 | 12 | 63662905  | 0.1470 | 97.89% | 1.000000 | 1.000000 | 0.04552000 | 0.05532000 | NM_007191       | downstream | 67769   | Hs.284122 | WIF1      |
| rs661240   | 11 | 81554995  | 0.3147 | 97.54% | 0.889900 | 0.618700 | 0.04552000 | 0.04465000 | ENST00000357859 | upstream   | 523254  | ---       | ---       |
| rs4896783  | 6  | 125539447 | 0.0394 | 84.56% | 0.043500 | 1.000000 | 0.04553000 | 0.05809000 | NM_001003397    | intron     | 0       | Hs.591347 | TPD52L1   |
| rs1486897  | 3  | 114698508 | 0.1641 | 90.88% | 0.173900 | 0.317100 | 0.04554000 | 0.01382000 | NM_144718       | intron     | 0       | Hs.477144 | CCDC52    |

|            |    |           |        |        |          |          |            |            |                 |            |         |           |           |
|------------|----|-----------|--------|--------|----------|----------|------------|------------|-----------------|------------|---------|-----------|-----------|
| rs10513530 | 3  | 160147221 | 0.2577 | 91.23% | 0.000035 | 0.000021 | 0.04555000 | 0.04599000 | NM_014575       | upstream   | 327083  | Hs.134665 | SCHIP1    |
| rs1067335  | 2  | 44479462  | 0.3457 | 94.39% | 0.789200 | 0.602300 | 0.04557000 | 0.01945000 | NM_024766       | intron     | 0       | Hs.468349 | C2orf34   |
| rs10486757 | 7  | 50661352  | 0.0799 | 94.39% | 0.229500 | 0.132900 | 0.04558000 | 0.45230000 | NM_001001555    | intron     | 0       | Hs.164060 | GRB10     |
| rs10520025 | 5  | 128486733 | 0.2653 | 97.19% | 0.216800 | 0.472300 | 0.04559000 | 0.07075000 | NM_016048       | downstream | 9121    | Hs.483296 | ISOC1     |
| rs2508371  | 11 | 100773657 | 0.1475 | 97.54% | 1.000000 | 1.000000 | 0.04559000 | 0.00417300 | NM_004621       | downstream | 53920   | Hs.159003 | TRPC6     |
| rs4954657  | 2  | 139878418 | 0.1315 | 94.74% | 0.791300 | 1.000000 | 0.04559000 | 0.13820000 | ENST00000384174 | upstream   | 107046  | ---       | ---       |
| rs10484903 | 6  | 108467752 | 0.0054 | 97.89% | 1.000000 | 1.000000 | 0.04560000 | 0.99900000 | NM_014028       | downstream | 1554    | Hs.226780 | OSTM1     |
| rs10494905 | 1  | 206988952 | 0.0054 | 97.89% | 1.000000 | 1.000000 | 0.04560000 | 0.99870000 | NM_025179       | upstream   | 504664  | Hs.497626 | PLXNA2    |
| rs10498506 | 14 | 62154183  | 0.0054 | 97.89% | 1.000000 | 1.000000 | 0.04560000 | 0.99900000 | NM_172375       | downstream | 88869   | Hs.27043  | KCNH5     |
| rs10499591 | 7  | 36524263  | 0.0054 | 97.89% | 1.000000 | 1.000000 | 0.04560000 | 0.99870000 | NM_001637       | intron     | 0       | Hs.488007 | AOAH      |
| rs10500487 | 16 | 62617865  | 0.0054 | 97.89% | 0.005386 | 1.000000 | 0.04560000 | 0.99860000 | NM_001797       | downstream | 920321  | Hs.116471 | CDH11     |
| rs10504750 | 8  | 83361452  | 0.0054 | 97.89% | 1.000000 | 1.000000 | 0.04560000 | 0.99880000 | NM_152837       | upstream   | 444462  | Hs.492121 | SNX16     |
| rs1393230  | 5  | 9677151   | 0.0054 | 97.89% | 1.000000 | 1.000000 | 0.04560000 | 0.99870000 | NM_019599       | downstream | 4964    | Hs.567492 | TAS2R1    |
| rs2361493  | 6  | 110477273 | 0.0054 | 97.89% | 1.000000 | 1.000000 | 0.04560000 | 0.99890000 | NM_001024936    | downstream | 51109   | Hs.75850  | WASF1     |
| rs3886641  | 7  | 30634762  | 0.0054 | 97.89% | 1.000000 | 1.000000 | 0.04560000 | 0.99880000 | NM_002047       | CDS        | 0       | Hs.404321 | GARS      |
| rs7120189  | 11 | 28648363  | 0.0054 | 97.89% | 1.000000 | 1.000000 | 0.04560000 | 0.99880000 | NM_152636       | downstream | 336844  | Hs.243326 | PLETSD1   |
| rs7576     | 10 | 85902586  | 0.1828 | 94.04% | 0.540800 | 1.000000 | 0.04560000 | 0.04304000 | NM_014394       | 3UTR       | 0       | Hs.352656 | GHITM     |
| rs1851243  | 3  | 118236015 | 0.3891 | 96.49% | 1.000000 | 0.438700 | 0.04561000 | 0.02865000 | ENST00000363502 | upstream   | 69252   | ---       | ---       |
| rs10504289 | 8  | 60315628  | 0.2284 | 97.54% | 0.865200 | 0.845600 | 0.04562000 | 0.02351000 | ENST00000384126 | upstream   | 103014  | ---       | ---       |
| rs10507441 | 13 | 36231087  | 0.0551 | 92.28% | 0.558000 | 0.577700 | 0.04563000 | 0.11070000 | NM_203451       | downstream | 61446   | Hs.422375 | LOC400120 |
| rs1257409  | 14 | 98681324  | 0.0132 | 92.98% | 1.000000 | 1.000000 | 0.04563000 | 0.09418000 | NM_022898       | downstream | 24053   | Hs.699440 | BCL11B    |
| rs10506433 | 12 | 60733039  | 0.1048 | 87.02% | 0.161600 | 0.014480 | 0.04566000 | 0.04238000 | NM_178539       | upstream   | 29210   | Hs.269745 | FAM19A2   |
| rs9319349  | 13 | 18801580  | 0.4136 | 95.44% | 0.453000 | 0.093570 | 0.04566000 | 0.02780000 | ENST00000305173 | upstream   | 52930   | ---       | ---       |
| rs10485057 | 6  | 154454948 | 0.0772 | 95.44% | 0.061360 | 0.180300 | 0.04567000 | 0.14660000 | NM_001008505    | intron     | 0       | Hs.2353   | OPRM1     |
| rs2060915  | 4  | 40956257  | 0.1573 | 93.68% | 0.490800 | 0.301800 | 0.04567000 | 0.06878000 | NM_004181       | intron     | 0       | Hs.518731 | UCHL1     |
| rs10520817 | 5  | 15612551  | 0.0694 | 88.42% | 0.103500 | 0.330500 | 0.04568000 | 0.15380000 | NM_012304       | upstream   | 56540   | Hs.433057 | FBXL7     |
| rs6424623  | 1  | 79258910  | 0.0799 | 94.39% | 0.679200 | 0.117000 | 0.04568000 | 0.02035000 | ENST00000370739 | upstream   | 13960   | ---       | ---       |
| rs1327559  | 10 | 97158130  | 0.0354 | 94.04% | 0.281400 | 1.000000 | 0.04569000 | 0.04902000 | NM_001034957    | intron     | 0       | Hs.696027 | SORBS1    |
| rs10505829 | 12 | 18731968  | 0.0351 | 95.09% | 1.000000 | 1.000000 | 0.04571000 | 0.04228000 | NM_033123       | intron     | 0       | Hs.97542  | PLCZ1     |
| rs2272433  | 6  | 139293010 | 0.0351 | 95.09% | 1.000000 | 1.000000 | 0.04571000 | 0.04373000 | NM_031922       | intron     | 0       | Hs.334603 | REPS1     |
| rs1834160  | 18 | 49560946  | 0.0771 | 97.89% | 1.000000 | 1.000000 | 0.04573000 | 0.10040000 | NM_005215       | downstream | 249925  | Hs.579550 | DCC       |
| rs7325791  | 13 | 103774402 | 0.0094 | 92.98% | 0.018850 | 1.000000 | 0.04573000 | 0.22700000 | NM_172370       | upstream   | 1142191 | Hs.381382 | DAOA      |
| rs690600   | 15 | 51796631  | 0.2670 | 97.89% | 0.759800 | 0.472300 | 0.04576000 | 0.00809800 | NM_182758       | intron     | 0       | Hs.122125 | WDR72     |
| rs725421   | 12 | 86220791  | 0.2274 | 97.19% | 1.000000 | 0.692700 | 0.04580000 | 0.11090000 | NM_013244       | upstream   | 1253145 | Hs.662231 | MGAT4C    |
| rs9312239  | 4  | 180199353 | 0.4226 | 79.30% | 0.000071 | 0.024230 | 0.04580000 | 0.10270000 | ENST00000364857 | downstream | 634395  | ---       | ---       |
| rs1916184  | 8  | 47842969  | 0.1515 | 84.56% | 0.010110 | 0.009701 | 0.04581000 | 0.07206000 | ENST00000388124 | downstream | 15714   | ---       | ---       |
| rs996655   | 12 | 98858278  | 0.3835 | 97.89% | 0.130100 | 0.250400 | 0.04582000 | 0.20590000 | NM_152788       | intron     | 0       | Hs.506458 | ANKS1B    |
| rs10510871 | 3  | 62065420  | 0.0773 | 97.54% | 0.386500 | 1.000000 | 0.04584000 | 0.02384000 | NM_002841       | intron     | 0       | Hs.654488 | PTPRG     |
| rs2383183  | 9  | 21177700  | 0.0539 | 94.39% | 0.549400 | 0.568700 | 0.04584000 | 0.01922000 | NM_021068       | upstream   | 30      | Hs.1510   | IFNA4     |
| rs6823638  | 4  | 20857093  | 0.2016 | 87.02% | 0.553400 | 0.415900 | 0.04584000 | 0.19950000 | NM_001035004    | intron     | 0       | Hs.655705 | KCNIP4    |
| rs1917213  | 7  | 42544397  | 0.0578 | 88.07% | 1.000000 | 1.000000 | 0.04585000 | 0.20210000 | NM_000168       | upstream   | 314977  | Hs.21509  | GLI3      |
| rs1358554  | 4  | 92512505  | 0.3513 | 94.39% | 0.503200 | 0.523600 | 0.04588000 | 0.02794000 | NM_207491       | intron     | 0       | Hs.654735 | MGC48628  |
| rs2640629  | 12 | 56351715  | 0.3413 | 95.09% | 0.080590 | 0.037290 | 0.04589000 | 0.26840000 | NM_001017958    | upstream   | 22497   | Hs.527861 | OS9       |
| rs2631271  | 4  | 103133419 | 0.1617 | 93.33% | 0.364000 | 0.337700 | 0.04591000 | 0.09787000 | NM_017935       | intron     | 0       | Hs.480400 | BANK1     |
| rs1351649  | 11 | 7703698   | 0.3370 | 94.74% | 0.275200 | 0.418200 | 0.04593000 | 0.18090000 | NM_198185       | upstream   | 19181   | Hs.532475 | OVCH2     |
| rs1519320  | 4  | 187177130 | 0.2154 | 93.68% | 0.018650 | 0.212100 | 0.04593000 | 0.19940000 | ENST00000363627 | downstream | 7479    | ---       | ---       |
| rs6880876  | 5  | 28317298  | 0.2729 | 95.79% | 0.092860 | 0.298900 | 0.04593000 | 0.21190000 | ENST00000387488 | upstream   | 343223  | ---       | ---       |
| rs2350786  | 7  | 136327110 | 0.4375 | 87.02% | 0.367800 | 0.417000 | 0.04594000 | 0.15000000 | NM_001006629    | intron     | 0       | Hs.535891 | CHRM2     |
| rs2909958  | 5  | 112195840 | 0.3242 | 95.79% | 0.268400 | 0.510300 | 0.04594000 | 0.23460000 | NM_000038       | intron     | 0       | Hs.158932 | APC       |
| rs10511548 | 9  | 10504108  | 0.1854 | 84.21% | 0.674400 | 1.000000 | 0.04597000 | 0.17080000 | ENST00000363183 | downstream | 1071756 | ---       | ---       |
| rs10493499 | 1  | 72728578  | 0.2103 | 95.09% | 0.855200 | 0.836300 | 0.04598000 | 0.04460000 | NM_173808       | upstream   | 207573  | Hs.146542 | NEGR1     |
| rs1919224  | 4  | 92505468  | 0.4249 | 95.79% | 0.385900 | 0.430600 | 0.04598000 | 0.18810000 | NM_207491       | intron     | 0       | Hs.654735 | MGC48628  |
| rs4545290  | 1  | 72728411  | 0.2103 | 95.09% | 0.855200 | 0.836300 | 0.04598000 | 0.04460000 | NM_173808       | upstream   | 207406  | Hs.146542 | NEGR1     |
| rs3738516  | 1  | 43212788  | 0.1984 | 88.42% | 1.000000 | 0.822800 | 0.04599000 | 0.09189000 | NM_006516       | upstream   | 15700   | Hs.473721 | SLC2A1    |

|            |    |           |        |        |          |          |            |            |                 |            |         |           |          |
|------------|----|-----------|--------|--------|----------|----------|------------|------------|-----------------|------------|---------|-----------|----------|
| rs2249862  | 21 | 21528981  | 0.4721 | 94.39% | 0.328900 | 0.762100 | 0.04600000 | 0.02173000 | NM_004540       | upstream   | 45786   | Hs.473450 | NCAM2    |
| rs10486245 | 7  | 8676842   | 0.0352 | 94.74% | 1.000000 | 1.000000 | 0.04601000 | 0.03832000 | NM_152745       | upstream   | 80321   | Hs.487564 | NXPH1    |
| rs2048178  | 2  | 41414979  | 0.2489 | 83.16% | 0.014280 | 0.420700 | 0.04602000 | 0.02679000 | NM_021097       | upstream   | 880791  | Hs.468274 | SLC8A1   |
| rs1016315  | 10 | 131742295 | 0.1152 | 94.39% | 0.368800 | 0.535100 | 0.04603000 | 0.16140000 | NM_001005463    | upstream   | 90200   | Hs.699395 | EBF3     |
| rs2880170  | 4  | 60264032  | 0.2319 | 96.84% | 0.400300 | 1.000000 | 0.04603000 | 0.01984000 | ENST00000364806 | upstream   | 117456  | ---       | ---      |
| rs2095447  | 6  | 84169475  | 0.4944 | 93.33% | 0.902400 | 0.444300 | 0.04605000 | 0.05139000 | NM_002395       | intron     | 0       | Hs.21160  | ME1      |
| rs10516658 | 4  | 82899808  | 0.0627 | 97.89% | 0.610600 | 0.604300 | 0.04606000 | 0.15230000 | NM_152545       | upstream   | 287723  | Hs.591696 | RASGEF1B |
| rs10516659 | 4  | 82899710  | 0.0627 | 97.89% | 0.610600 | 0.604300 | 0.04606000 | 0.23690000 | NM_152545       | upstream   | 287625  | Hs.591696 | RASGEF1B |
| rs1996553  | 15 | 68011638  | 0.2652 | 97.89% | 0.538400 | 0.148900 | 0.04607000 | 0.16250000 | NM_005078       | downstream | 117835  | Hs.287362 | TLE3     |
| rs10485363 | 6  | 13245751  | 0.1592 | 93.68% | 0.356600 | 0.611000 | 0.04608000 | 0.03191000 | NM_030948       | intron     | 0       | Hs.436996 | PHACTR1  |
| rs1475398  | 1  | 65755845  | 0.3487 | 95.09% | 0.893700 | 1.000000 | 0.04609000 | 0.11900000 | NM_001003680    | intron     | 0       | Hs.705413 | LEPR     |
| rs4466461  | 9  | 120353919 | 0.4244 | 95.09% | 0.046420 | 0.285100 | 0.04609000 | 0.03594000 | NM_014618       | downstream | 614810  | Hs.532316 | DBC1     |
| rs10483358 | 14 | 30456745  | 0.0054 | 97.54% | 1.000000 | 1.000000 | 0.04610000 | 0.99880000 | NM_014574       | intron     | 0       | Hs.401843 | STRN3    |
| rs10505525 | 8  | 129519439 | 0.0054 | 97.54% | 0.005405 | 1.000000 | 0.04610000 | 0.99870000 | ENST00000364912 | downstream | 217180  | ---       | ---      |
| rs10518067 | 4  | 70694528  | 0.0054 | 97.54% | 1.000000 | 1.000000 | 0.04610000 | 0.99870000 | NM_014465       | upstream   | 33509   | Hs.129742 | SULT1B1  |
| rs2964302  | 5  | 165911438 | 0.1964 | 88.42% | 1.000000 | 0.655500 | 0.04610000 | 0.03567000 | ENST00000320147 | downstream | 169251  | ---       | ---      |
| rs10502607 | 18 | 28562048  | 0.2973 | 92.63% | 0.184600 | 0.489300 | 0.04613000 | 0.23120000 | NM_020805       | intron     | 0       | Hs.446164 | KLHL14   |
| rs346510   | 4  | 87055405  | 0.3799 | 97.89% | 0.030460 | 0.323600 | 0.04615000 | 0.21260000 | NM_001025616    | intron     | 0       | Hs.444229 | ARHGAP24 |
| rs10516583 | 4  | 113244713 | 0.1347 | 95.09% | 1.000000 | 0.702300 | 0.04619000 | 0.15700000 | NM_152400       | upstream   | 41414   | Hs.23439  | C4orf32  |
| rs1504795  | 8  | 91935906  | 0.4532 | 93.68% | 0.083770 | 0.094990 | 0.04619000 | 0.13640000 | NM_022351       | intron     | 0       | Hs.560892 | NECAB1   |
| rs6461856  | 7  | 3133925   | 0.1727 | 97.54% | 0.020330 | 0.074500 | 0.04619000 | 0.03711000 | NM_032415       | upstream   | 83900   | Hs.648101 | CARD11   |
| rs1011844  | 8  | 83545626  | 0.1872 | 79.65% | 0.662400 | 1.000000 | 0.04620000 | 0.03989000 | NM_152837       | upstream   | 628636  | Hs.492121 | SNX16    |
| rs10498074 | 2  | 220842523 | 0.0568 | 92.63% | 0.195800 | 0.209500 | 0.04620000 | 0.05971000 | ENST00000355668 | upstream   | 568571  | ---       | ---      |
| rs10503629 | 8  | 18601009  | 0.0055 | 96.49% | 1.000000 | 1.000000 | 0.04620000 | 0.99870000 | NM_206909       | intron     | 0       | Hs.434255 | PSD3     |
| rs10496986 | 2  | 146210691 | 0.4449 | 85.96% | 0.156100 | 0.038590 | 0.04623000 | 0.09793000 | NM_014795       | upstream   | 1216305 | Hs.34871  | ZEB2     |
| rs757918   | 2  | 101979731 | 0.4064 | 88.07% | 0.695400 | 0.751000 | 0.04623000 | 0.05969000 | NM_173343       | intron     | 0       | Hs.25333  | ILIR2    |
| rs7816623  | 8  | 105733450 | 0.2239 | 90.88% | 0.475300 | 0.141200 | 0.04623000 | 0.04385000 | NM_013437       | upstream   | 63123   | Hs.654804 | LRP12    |
| rs313265   | 2  | 125818067 | 0.1580 | 94.39% | 0.820900 | 0.610200 | 0.04624000 | 0.14640000 | NM_016815       | upstream   | 1346477 | Hs.59138  | GYPC     |
| rs2040644  | 12 | 46021747  | 0.0558 | 94.39% | 0.575100 | 0.598000 | 0.04625000 | 0.07430000 | NM_138371       | downstream | 105041  | Hs.560100 | FAM113B  |
| rs10491865 | 9  | 1312136   | 0.2717 | 96.84% | 0.447000 | 0.838300 | 0.04626000 | 0.15240000 | NM_181872       | downstream | 264584  | Hs.59506  | DMRT2    |
| rs2026978  | 9  | 31605043  | 0.4722 | 94.74% | 1.000000 | 0.760900 | 0.04626000 | 0.08861000 | ENST00000360120 | downstream | 360785  | ---       | ---      |
| rs2331107  | 5  | 33004477  | 0.0556 | 94.74% | 1.000000 | 1.000000 | 0.04626000 | 0.06060000 | NM_024563       | downstream | 176901  | Hs.13528  | C5orf23  |
| rs1002508  | 12 | 129318585 | 0.0554 | 95.09% | 0.572300 | 0.595800 | 0.04627000 | 0.02035000 | NM_007197       | downstream | 102348  | Hs.31664  | FZD10    |
| rs4449188  | 2  | 99915769  | 0.0573 | 91.93% | 0.041850 | 0.045990 | 0.04627000 | 0.20900000 | NM_001025108    | intron     | 0       | Hs.444414 | AFF3     |
| rs881958   | 6  | 156774970 | 0.0988 | 90.53% | 0.084250 | 1.000000 | 0.04627000 | 0.14390000 | ENST00000385709 | downstream | 33323   | ---       | ---      |
| rs10512902 | 5  | 6956471   | 0.3545 | 77.19% | 0.076240 | 0.160100 | 0.04630000 | 0.06608000 | ENST00000363373 | upstream   | 54896   | ---       | ---      |
| rs2241992  | 2  | 106765797 | 0.1574 | 94.74% | 0.820300 | 0.455200 | 0.04632000 | 0.06776000 | NM_032528       | downstream | 18695   | Hs.98265  | ST6GAL2  |
| rs6140677  | 20 | 8597582   | 0.0664 | 95.09% | 0.327600 | 1.000000 | 0.04632000 | 0.03352000 | NM_182734       | intron     | 0       | Hs.431173 | PLCB1    |
| rs207295   | 4  | 18710314  | 0.0266 | 92.28% | 1.000000 | 1.000000 | 0.04633000 | 0.01330000 | ENST00000360734 | upstream   | 16568   | ---       | ---      |
| rs10499207 | 6  | 139328550 | 0.0353 | 94.39% | 1.000000 | 1.000000 | 0.04634000 | 0.04794000 | NM_031922       | intron     | 0       | Hs.334603 | REPS1    |
| rs10504470 | 8  | 71253000  | 0.1561 | 94.39% | 0.352400 | 0.606400 | 0.04636000 | 0.04182000 | NM_006540       | intron     | 0       | Hs.446678 | NCOA2    |
| rs705197   | 1  | 34617423  | 0.1673 | 89.12% | 0.039310 | 0.747100 | 0.04636000 | 0.12330000 | NM_032884       | downstream | 160104  | Hs.194610 | C1orf94  |
| rs10501182 | 11 | 37605068  | 0.1127 | 85.61% | 0.203800 | 0.493500 | 0.04638000 | 0.02493000 | NM_138787       | downstream | 967671  | Hs.406726 | C11orf74 |
| rs4113916  | 5  | 130089917 | 0.1573 | 93.68% | 0.252000 | 0.203700 | 0.04638000 | 0.11650000 | NM_005340       | downstream | 432966  | Hs.483305 | HINT1    |
| rs10509130 | 10 | 61791118  | 0.2547 | 92.98% | 0.626800 | 0.576000 | 0.04641000 | 0.04795000 | NM_020987       | intron     | 0       | Hs.499725 | ANK3     |
| rs10503352 | 8  | 5939750   | 0.0643 | 95.44% | 1.000000 | 1.000000 | 0.04644000 | 0.10540000 | NM_024596       | upstream   | 311780  | Hs.656769 | MCPH1    |
| rs1394605  | 5  | 155692365 | 0.0643 | 95.44% | 1.000000 | 1.000000 | 0.04644000 | 0.05024000 | NM_172244       | intron     | 0       | Hs.591727 | MGCD     |
| rs354877   | 4  | 68150615  | 0.1268 | 96.84% | 0.410500 | 1.000000 | 0.04645000 | 0.07982000 | NM_012108       | intron     | 0       | Hs.435579 | STAP1    |
| rs1220849  | 4  | 70849631  | 0.4778 | 94.74% | 0.544600 | 0.363900 | 0.04646000 | 0.10170000 | NM_001025104    | downstream | 2754    | Hs.3155   | CSN1S1   |
| rs949586   | 1  | 37555489  | 0.4778 | 94.74% | 0.807200 | 0.762200 | 0.04646000 | 0.01778000 | NM_025079       | upstream   | 157251  | Hs.656294 | ZC3H12A  |
| rs25999    | 5  | 106832906 | 0.3058 | 91.23% | 0.188100 | 0.862800 | 0.04651000 | 0.06632000 | NM_001962       | intron     | 0       | Hs.658451 | EFNA5    |
| rs2106092  | 1  | 157099068 | 0.1851 | 91.93% | 1.000000 | 0.256900 | 0.04652000 | 0.04220000 | NM_002432       | downstream | 13150   | Hs.153837 | MNDA     |
| rs1122080  | 5  | 157948481 | 0.2018 | 96.49% | 0.023530 | 0.009119 | 0.04653000 | 0.13070000 | NM_024007       | downstream | 110216  | Hs.657753 | EBF1     |
| rs6840951  | 4  | 14053172  | 0.1863 | 92.28% | 0.226900 | 0.384600 | 0.04657000 | 0.03355000 | NM_148894       | upstream   | 814727  | Hs.444517 | FAM44A   |

|            |    |           |        |        |           |          |            |            |                 |            |         |           |           |
|------------|----|-----------|--------|--------|-----------|----------|------------|------------|-----------------|------------|---------|-----------|-----------|
| rs9297775  | 8  | 129805894 | 0.2907 | 94.74% | 0.554800  | 1.000000 | 0.04657000 | 0.03445000 | ENST00000384930 | downstream | 95328   | ---       | ---       |
| rs1280099  | 4  | 187775324 | 0.4888 | 94.39% | 0.272100  | 0.128700 | 0.04658000 | 0.13850000 | NM_005245       | CDS        | 0       | Hs.481371 | FAT       |
| rs2346442  | 7  | 133356447 | 0.3219 | 97.54% | 0.582600  | 0.869700 | 0.04658000 | 0.14220000 | NM_001037126    | intron     | 0       | Hs.321273 | EXOC4     |
| rs10490900 | 10 | 29609281  | 0.0060 | 88.42% | 1.000000  | 1.000000 | 0.04659000 | 0.99870000 | NM_032517       | upstream   | 8715    | Hs.558572 | LYZL1     |
| rs10512175 | 9  | 88142133  | 0.0541 | 94.04% | 0.550900  | 0.568700 | 0.04659000 | 0.12710000 | NM_024617       | intron     | 0       | Hs.655162 | ZCCHC6    |
| rs10484822 | 6  | 139973840 | 0.0054 | 97.19% | 1.000000  | 1.000000 | 0.04660000 | 0.99870000 | NM_006079       | upstream   | 236362  | Hs.82071  | CITED2    |
| rs355686   | 4  | 78724396  | 0.1892 | 90.88% | 1.000000  | 0.397400 | 0.04660000 | 0.01152000 | NM_006419       | upstream   | 21602   | Hs.100431 | CXCL13    |
| rs2243737  | 20 | 50943913  | 0.3895 | 90.53% | 1.0795000 | 0.178700 | 0.04661000 | 0.00144000 | NM_173485       | upstream   | 78440   | Hs.473117 | TSHZ2     |
| rs313877   | 11 | 102830195 | 0.1325 | 94.04% | 0.281000  | 0.135900 | 0.04661000 | 0.05094000 | ENST00000334267 | intron     | 0       | ---       | ---       |
| rs2526471  | 17 | 20092265  | 0.3383 | 94.39% | 0.497600  | 0.048860 | 0.04662000 | 0.06597000 | NM_001033553    | intron     | 0       | Hs.431045 | SPECC1    |
| rs2097229  | 7  | 141736663 | 0.3521 | 93.68% | 0.043560  | 0.300200 | 0.04663000 | 0.13710000 | ENST00000356506 | intron     | 0       | ---       | ---       |
| rs1113765  | 7  | 55856828  | 0.2932 | 93.33% | 0.767400  | 0.727700 | 0.04664000 | 0.01068000 | NM_207366       | intron     | 0       | Hs.453629 | 14.Sep    |
| rs10488628 | 7  | 128155128 | 0.4833 | 94.74% | 0.028900  | 0.009583 | 0.04665000 | 0.10200000 | NM_032599       | intron     | 0       | Hs.131098 | FAM71F1   |
| rs10518077 | 4  | 71252668  | 0.0535 | 95.09% | 1.000000  | 1.000000 | 0.04666000 | 0.16660000 | NM_012390       | upstream   | 8414    | Hs.701334 | SMR3A     |
| rs925986   | 2  | 151321815 | 0.0535 | 95.09% | 0.546600  | 1.000000 | 0.04666000 | 0.04435000 | NM_005168       | upstream   | 269389  | Hs.6838   | RND3      |
| rs10488625 | 7  | 135928298 | 0.2595 | 92.63% | 0.633500  | 0.267900 | 0.04667000 | 0.03341000 | NM_001006629    | upstream   | 275658  | Hs.535891 | CHRM2     |
| rs998247   | 14 | 64616052  | 0.2595 | 92.63% | 0.748400  | 0.853200 | 0.04667000 | 0.05924000 | NM_197957       | intron     | 0       | Hs.285354 | MAX       |
| rs723364   | 4  | 111943920 | 0.1989 | 97.89% | 0.134800  | 0.793000 | 0.04668000 | 0.03156000 | NM_000325       | upstream   | 180217  | Hs.643588 | PITX2     |
| rs250141   | 16 | 78218998  | 0.4094 | 96.84% | 0.061550  | 0.451600 | 0.04669000 | 0.04995000 | NM_001031804    | upstream   | 26886   | Hs.134859 | MAF       |
| rs1053054  | 8  | 75056579  | 0.2767 | 88.77% | 1.000000  | 0.366000 | 0.04670000 | 0.05029000 | NM_001040613    | 3UTR       | 0       | Hs.106650 | TMEM70    |
| rs11066209 | 12 | 111161662 | 0.1733 | 97.19% | 0.527300  | 1.000000 | 0.04670000 | 0.05331000 | ENST00000377563 | intron     | 0       | ---       | ---       |
| rs10500329 | 16 | 5834783   | 0.4779 | 95.09% | 0.330600  | 0.450800 | 0.04672000 | 0.08661000 | NM_001013705    | upstream   | 532982  | ---       | LOC440337 |
| rs9307376  | 4  | 113089585 | 0.3917 | 89.12% | 0.293600  | 0.864900 | 0.04675000 | 0.06906000 | NM_152400       | upstream   | 196542  | Hs.23439  | C4orf32   |
| rs4364933  | 1  | 200942166 | 0.2815 | 89.12% | 0.437200  | 0.475200 | 0.04680000 | 0.05878000 | NM_177402       | intron     | 0       | Hs.585015 | SYT2      |
| rs2422207  | 1  | 170914146 | 0.2771 | 81.05% | 0.870900  | 0.255600 | 0.04683000 | 0.00683900 | NM_000639       | downstream | 11509   | Hs.2007   | FASLG     |
| rs1943788  | 18 | 69169964  | 0.4164 | 96.49% | 0.081860  | 0.208400 | 0.04685000 | 0.20370000 | NM_138966       | upstream   | 486050  | Hs.465407 | NETO1     |
| rs3736585  | 10 | 124732576 | 0.4164 | 96.49% | 0.136000  | 0.345500 | 0.04685000 | 0.03576000 | NM_153336       | intron     | 0       | Hs.281004 | PSTK      |
| rs4775711  | 15 | 45859424  | 0.4244 | 95.09% | 0.709900  | 0.645500 | 0.04685000 | 0.11370000 | NM_024966       | downstream | 9388    | Hs.511265 | SEMA6D    |
| rs7084992  | 10 | 58087356  | 0.2036 | 96.49% | 0.060950  | 0.087910 | 0.04685000 | 0.33750000 | NM_001005414    | upstream   | 296323  | ---       | ZWINT     |
| rs4520564  | 11 | 100808606 | 0.0443 | 95.09% | 0.412900  | 1.000000 | 0.04686000 | 0.01564000 | NM_004621       | downstream | 18971   | Hs.159003 | TRPC6     |
| rs10517830 | 4  | 63388819  | 0.0677 | 93.33% | 0.617000  | 0.610900 | 0.04687000 | 0.02472000 | NM_001010874    | downstream | 1439566 | Hs.227752 | SRD5A2L2  |
| rs2135615  | 4  | 178551536 | 0.2399 | 95.79% | 0.318000  | 0.171300 | 0.04688000 | 0.04539000 | NM_018248       | downstream | 30542   | Hs.405467 | NEIL3     |
| rs9321445  | 6  | 134794917 | 0.2100 | 94.39% | 0.712800  | 0.452600 | 0.04688000 | 0.02554000 | NM_005627       | upstream   | 257237  | Hs.510078 | SGK1      |
| rs3786335  | 18 | 59712501  | 0.3774 | 90.18% | 1.000000  | 0.394300 | 0.04692000 | 0.07913000 | NM_002575       | intron     | 0       | Hs.594481 | SERPINB2  |
| rs3845680  | 2  | 25952517  | 0.4328 | 94.04% | 0.215400  | 1.000000 | 0.04695000 | 0.00984800 | NM_018263       | intron     | 0       | Hs.700650 | ASXL2     |
| rs10485835 | 7  | 141093287 | 0.3520 | 68.77% | 0.018480  | 0.063180 | 0.04696000 | 0.04302000 | NM_003143       | intron     | 0       | Hs.490394 | SSBP1     |
| rs443537   | 3  | 8797352   | 0.2126 | 75.09% | 0.006897  | 0.020240 | 0.04696000 | 0.04160000 | NM_000916       | upstream   | 11052   | Hs.2820   | OXTR      |
| rs6133598  | 20 | 8597730   | 0.0566 | 92.98% | 0.580900  | 1.000000 | 0.04696000 | 0.02698000 | NM_182734       | intron     | 0       | Hs.431173 | PLCB1     |
| rs10514260 | 5  | 83007677  | 0.4588 | 93.68% | 1.000000  | 0.878400 | 0.04697000 | 0.04488000 | NM_001884       | intron     | 0       | Hs.591758 | HAPLN1    |
| rs215702   | 7  | 32366183  | 0.3030 | 92.63% | 0.465800  | 0.442100 | 0.04698000 | 0.07124000 | NM_005020       | upstream   | 288667  | Hs.655694 | PDE1C     |
| rs2385525  | 8  | 50768163  | 0.1357 | 94.39% | 0.437200  | 1.000000 | 0.04698000 | 0.05407000 | NM_018967       | upstream   | 701163  | Hs.584914 | SNTG1     |
| rs598810   | 7  | 42940865  | 0.1357 | 94.39% | 0.117600  | 0.470200 | 0.04698000 | 0.03812000 | NM_031903       | intron     | 0       | Hs.50252  | MRPL32    |
| rs1863246  | 12 | 9410439   | 0.0094 | 93.33% | 1.000000  | 1.000000 | 0.04700000 | 0.11600000 | ENST00000334227 | downstream | 31061   | ---       | ---       |
| rs10521198 | 17 | 12550196  | 0.0917 | 97.54% | 0.264700  | 1.000000 | 0.04703000 | 0.14810000 | NM_153604       | intron     | 0       | Hs.567641 | MYOCD     |
| rs10500910 | 11 | 21561727  | 0.0667 | 94.74% | 1.000000  | 0.365500 | 0.04704000 | 0.05725000 | NM_006157       | downstream | 7924    | Hs.657172 | NELL1     |
| rs767278   | 3  | 64954723  | 0.0667 | 94.74% | 0.329300  | 1.000000 | 0.04704000 | 0.00635000 | NM_182920       | upstream   | 306318  | Hs.656071 | ADAMTS9   |
| rs851408   | 2  | 19307216  | 0.1286 | 96.84% | 0.787900  | 0.553900 | 0.04704000 | 0.23630000 | NM_145260       | downstream | 107511  | Hs.123933 | OSR1      |
| rs1358987  | 11 | 35998190  | 0.0812 | 95.09% | 0.233300  | 0.382100 | 0.04710000 | 0.02287000 | NM_174902       | intron     | 0       | Hs.700909 | LDLRAD3   |
| rs10484708 | 6  | 56209427  | 0.0787 | 82.46% | 1.000000  | 1.000000 | 0.04711000 | 0.05167000 | NM_030820       | intron     | 0       | Hs.47629  | COL21A1   |
| rs2369955  | 3  | 134176278 | 0.1610 | 93.68% | 1.000000  | 0.329200 | 0.04711000 | 0.04176000 | NM_023943       | upstream   | 63658   | Hs.191616 | TMEM108   |
| rs2823503  | 21 | 16124683  | 0.1610 | 93.68% | 0.822400  | 0.206100 | 0.04711000 | 0.01955000 | NM_013396       | intron     | 0       | Hs.473370 | USP25     |
| rs2647468  | 1  | 218235256 | 0.2537 | 94.04% | 0.749300  | 0.577000 | 0.04712000 | 0.09284000 | NM_004446       | intron     | 0       | Hs.497788 | EPRS      |
| rs840611   | 2  | 187906691 | 0.2996 | 93.68% | 0.019940  | 0.039770 | 0.04712000 | 0.03065000 | NM_005795       | downstream | 11386   | Hs.470882 | CALCRL    |
| rs7679666  | 4  | 84925488  | 0.4478 | 94.04% | 1.000000  | 0.875500 | 0.04714000 | 0.00827100 | ENST00000364763 | upstream   | 149015  | ---       | ---       |

|            |    |           |        |        |          |          |            |            |                 |            |         |           |          |
|------------|----|-----------|--------|--------|----------|----------|------------|------------|-----------------|------------|---------|-----------|----------|
| rs10496660 | 2  | 127629514 | 0.3989 | 97.19% | 0.045980 | 0.015070 | 0.04715000 | 0.12570000 | NM_001001665    | downstream | 30948   | Hs.407639 | CYP27C1  |
| rs542610   | 13 | 27133069  | 0.2070 | 95.79% | 0.459300 | 1.000000 | 0.04715000 | 0.27730000 | NM_152705       | intron     | 0       | Hs.507584 | POLR1D   |
| rs10509002 | 10 | 55338443  | 0.0746 | 87.02% | 0.000077 | 0.000541 | 0.04717000 | 0.14680000 | NM_033056       | intron     | 0       | Hs.672170 | PCDH15   |
| rs8076457  | 17 | 8884654   | 0.2014 | 97.54% | 1.000000 | 0.205800 | 0.04717000 | 0.00479400 | NM_004822       | intron     | 0       | Hs.660885 | NTN1     |
| rs10510190 | 3  | 2393162   | 0.0896 | 88.07% | 0.120400 | 0.193700 | 0.04718000 | 0.09054000 | NM_175613       | upstream   | 194929  | Hs.298705 | CNTN4    |
| rs10520854 | 5  | 18025013  | 0.2454 | 95.09% | 0.190400 | 0.185700 | 0.04719000 | 0.03119000 | ENST00000332101 | upstream   | 336617  | ---       | ---      |
| rs1430234  | 2  | 221931940 | 0.3052 | 93.68% | 0.313200 | 0.258400 | 0.04720000 | 0.04881000 | NM_004438       | downstream | 59053   | Hs.371218 | EPHA4    |
| rs1819633  | 6  | 141354060 | 0.4625 | 93.68% | 0.221300 | 0.273600 | 0.04720000 | 0.25550000 | NM_006079       | upstream   | 1616582 | Hs.82071  | CITED2   |
| rs2247034  | 13 | 77849881  | 0.2706 | 97.89% | 0.879600 | 0.211000 | 0.04722000 | 0.06423000 | NM_006237       | downstream | 221347  | Hs.654522 | POU4F1   |
| rs1498841  | 3  | 69663376  | 0.2556 | 93.33% | 0.146800 | 0.026220 | 0.04723000 | 0.06085000 | NM_198178       | upstream   | 232276  | Hs.166017 | MITF     |
| rs9283716  | 5  | 56022507  | 0.0055 | 95.79% | 0.005505 | 1.000000 | 0.04723000 | 0.99870000 | ENST00000381279 | upstream   | 84691   | ---       | ---      |
| rs2135760  | 6  | 54740495  | 0.3861 | 83.16% | 0.001568 | 0.001615 | 0.04727000 | 0.06081000 | NM_014464       | downstream | 377625  | Hs.127011 | TINAG    |
| rs1383102  | 12 | 74303228  | 0.1593 | 94.74% | 0.647700 | 1.000000 | 0.04730000 | 0.03208000 | NM_007043       | upstream   | 111569  | Hs.645517 | KRR1     |
| rs6916797  | 6  | 51774782  | 0.2973 | 92.63% | 0.557200 | 0.556200 | 0.04730000 | 0.04212000 | NM_170724       | intron     | 0       | Hs.662050 | PKHD1    |
| rs1972855  | 3  | 61077762  | 0.3267 | 97.19% | 0.341500 | 0.513000 | 0.04732000 | 0.03143000 | NM_002841       | upstream   | 445240  | Hs.654488 | PTPRG    |
| rs10499053 | 6  | 110047191 | 0.3303 | 97.19% | 0.787200 | 0.747600 | 0.04733000 | 0.03312000 | ENST00000368948 | intron     | 0       | ---       | ---      |
| rs571693   | 9  | 14100242  | 0.2040 | 97.19% | 0.853500 | 1.000000 | 0.04734000 | 0.11140000 | NM_005596       | intron     | 0       | Hs.644095 | NFIB     |
| rs1073599  | 7  | 22855042  | 0.3074 | 90.18% | 0.018770 | 0.017430 | 0.04736000 | 0.02706000 | NM_019059       | upstream   | 26096   | Hs.112318 | TOMM7    |
| rs9302260  | 15 | 69961665  | 0.3304 | 80.70% | 0.139300 | 0.560200 | 0.04736000 | 0.00910600 | NM_006901       | intron     | 0       | Hs.546268 | MYO9A    |
| rs2790070  | 1  | 193811183 | 0.1393 | 91.93% | 0.304700 | 0.705900 | 0.04737000 | 0.04727000 | NM_198503       | downstream | 650353  | Hs.657046 | KCNT2    |
| rs9325124  | 5  | 148229011 | 0.4029 | 97.54% | 0.215400 | 0.872900 | 0.04737000 | 0.05172000 | NM_000024       | downstream | 40564   | Hs.591251 | ADRB2    |
| rs10511424 | 3  | 125711810 | 0.0667 | 94.74% | 1.000000 | 1.000000 | 0.04738000 | 0.04923000 | NM_003947       | intron     | 0       | Hs.8004   | KALRN    |
| rs2393150  | 10 | 58350942  | 0.0728 | 89.12% | 0.628500 | 1.000000 | 0.04741000 | 0.11060000 | NM_001005414    | upstream   | 559902  | ---       | ZWINT    |
| rs10490161 | 2  | 51160894  | 0.1550 | 84.91% | 0.136400 | 0.152900 | 0.04743000 | 0.01805000 | ENST00000378257 | upstream   | 51985   | ---       | ---      |
| rs10486430 | 7  | 24710178  | 0.0444 | 94.74% | 1.000000 | 1.000000 | 0.04744000 | 0.06855000 | NM_004403       | intron     | 0       | Hs.520708 | DFNA5    |
| rs1399428  | 9  | 119700389 | 0.3309 | 95.44% | 0.339600 | 0.098360 | 0.04744000 | 0.01716000 | NM_138554       | downstream | 181419  | Hs.174312 | TLR4     |
| rs10504382 | 8  | 66158149  | 0.1738 | 97.89% | 0.143800 | 0.349500 | 0.04747000 | 0.06174000 | NM_004820       | upstream   | 284247  | Hs.667720 | CYP7B1   |
| rs3005894  | 1  | 56557350  | 0.1751 | 97.19% | 0.062530 | 0.351600 | 0.04747000 | 0.07632000 | NM_177414       | downstream | 175177  | Hs.405156 | PPAP2B   |
| rs2614059  | 8  | 28212815  | 0.1162 | 95.09% | 0.145900 | 1.000000 | 0.04751000 | 0.43710000 | NM_006228       | upstream   | 17753   | Hs.88218  | PNOC     |
| rs6734835  | 2  | 228923891 | 0.0695 | 93.33% | 0.119600 | 1.000000 | 0.04752000 | 0.03780000 | NM_030623       | upstream   | 169305  | Hs.436306 | SPHKAP   |
| rs10497940 | 2  | 211685573 | 0.2444 | 94.04% | 1.000000 | 1.000000 | 0.04754000 | 0.09109000 | NM_001042599    | downstream | 271012  | Hs.390729 | ERBB4    |
| rs2104527  | 10 | 120684972 | 0.1727 | 97.54% | 1.000000 | 1.000000 | 0.04757000 | 0.24890000 | NM_001009553    | upstream   | 94246   | ---       | NANOS1   |
| rs10483984 | 14 | 85223780  | 0.2802 | 95.79% | 0.229800 | 0.313800 | 0.04759000 | 0.34340000 | NM_013231       | downstream | 59758   | Hs.533710 | FLRT2    |
| rs10512557 | 17 | 66450255  | 0.2183 | 94.04% | 0.595300 | 0.683400 | 0.04761000 | 0.05179000 | NM_000891       | downstream | 762500  | Hs.1547   | KCNJ2    |
| rs7962399  | 12 | 113228631 | 0.3087 | 92.63% | 0.013750 | 0.173400 | 0.04761000 | 0.04067000 | NM_181486       | downstream | 47488   | Hs.381715 | TBX5     |
| rs10492448 | 13 | 74546514  | 0.0093 | 94.04% | 1.000000 | 1.000000 | 0.04762000 | 0.02641000 | ENST00000384085 | upstream   | 35211   | ---       | ---      |
| rs4129191  | 2  | 44059455  | 0.4777 | 86.67% | 0.074330 | 0.108600 | 0.04762000 | 0.06497000 | NM_133259       | intron     | 0       | Hs.368084 | LRPPRC   |
| rs10491299 | 5  | 136367514 | 0.1125 | 95.09% | 0.758200 | 0.742200 | 0.04763000 | 0.08488000 | NM_004598       | intron     | 0       | Hs.654695 | SPOCK1   |
| rs10505035 | 8  | 103844351 | 0.3694 | 94.04% | 0.599700 | 0.755200 | 0.04763000 | 0.01564000 | NM_207505       | upstream   | 43875   | ---       | FLJ45248 |
| rs1950703  | 14 | 32116139  | 0.1125 | 95.09% | 0.354700 | 0.191700 | 0.04763000 | 0.05004000 | NM_004274       | CDS        | 0       | Hs.509083 | AKAP6    |
| rs9320807  | 6  | 121694486 | 0.4094 | 96.84% | 0.619800 | 1.000000 | 0.04763000 | 0.02210000 | NM_152730       | intron     | 0       | Hs.121396 | C6orf170 |
| rs1037291  | 5  | 3097895   | 0.1845 | 95.09% | 0.690300 | 0.781000 | 0.04767000 | 0.02483000 | NM_178569       | downstream | 289384  | Hs.668017 | C5orf38  |
| rs260818   | 11 | 103425315 | 0.3619 | 94.04% | 0.792700 | 0.735500 | 0.04767000 | 0.24320000 | NM_033135       | intron     | 0       | Hs.352298 | PDGFD    |
| rs6992591  | 8  | 116437619 | 0.1760 | 87.72% | 0.186900 | 0.810400 | 0.04768000 | 0.02899000 | NM_014112       | downstream | 56352   | Hs.657018 | TRPS1    |
| rs7813351  | 8  | 2940819   | 0.4032 | 97.89% | 0.456100 | 0.634100 | 0.04769000 | 0.16500000 | NM_033225       | intron     | 0       | Hs.571466 | CSMD1    |
| rs10489269 | 1  | 171426686 | 0.0685 | 94.74% | 1.000000 | 1.000000 | 0.04770000 | 0.19650000 | NM_003326       | intron     | 0       | Hs.181097 | TNFSF4   |
| rs720092   | 11 | 22434196  | 0.2356 | 97.54% | 0.867800 | 0.822700 | 0.04770000 | 0.05906000 | NM_020346       | downstream | 76577   | Hs.242821 | SLC17A6  |
| rs199241   | 6  | 143384561 | 0.1295 | 97.54% | 0.791500 | 1.000000 | 0.04772000 | 0.07415000 | NM_016108       | upstream   | 39145   | Hs.567501 | AIG1     |
| rs2823976  | 21 | 16979504  | 0.2500 | 94.74% | 1.000000 | 0.707100 | 0.04773000 | 0.12320000 | NM_001005734    | downstream | 78091   | Hs.473394 | C21orf34 |
| rs4605250  | 18 | 36919202  | 0.1300 | 97.19% | 0.281200 | 0.136900 | 0.04773000 | 0.27250000 | NM_002647       | upstream   | 869995  | Hs.464971 | PIK3C3   |
| rs1816804  | 15 | 43723047  | 0.4182 | 96.49% | 0.048460 | 0.040270 | 0.04774000 | 0.11100000 | NM_021199       | intron     | 0       | Hs.511251 | SQRDL    |
| rs717224   | 6  | 25689859  | 0.0055 | 95.44% | 1.000000 | 1.000000 | 0.04775000 | 0.99870000 | ENST00000329474 | intron     | 0       | ---       | ---      |
| rs9300106  | 11 | 10756011  | 0.2615 | 91.93% | 0.632200 | 0.712000 | 0.04775000 | 0.11360000 | NM_014633       | intron     | 0       | Hs.173288 | CTR9     |
| rs1344421  | 1  | 61603645  | 0.2183 | 94.04% | 0.472700 | 0.462500 | 0.04776000 | 0.21830000 | NM_005595       | intron     | 0       | Hs.191911 | NFIA     |

|            |    |           |        |        |          |          |            |            |                 |            |        |           |          |
|------------|----|-----------|--------|--------|----------|----------|------------|------------|-----------------|------------|--------|-----------|----------|
| rs2497350  | 10 | 94511239  | 0.1290 | 97.89% | 0.790900 | 0.560600 | 0.04776000 | 0.11060000 | NM_001013848    | upstream   | 73208  | Hs.655657 | EXOC6    |
| rs2250879  | 8  | 14713113  | 0.3366 | 89.12% | 0.888800 | 0.367400 | 0.04778000 | 0.08566000 | NM_139167       | intron     | 0      | Hs.676196 | SGCZ     |
| rs17622602 | 7  | 53590451  | 0.0100 | 87.72% | 1.000000 | 1.000000 | 0.04779000 | 0.10220000 | ENST00000388026 | upstream   | 64826  | ---       | ---      |
| rs10516729 | 4  | 85950660  | 0.1300 | 97.19% | 0.792100 | 0.227100 | 0.04780000 | 0.02522000 | NM_178585       | intron     | 0      | Hs.480116 | WDFY3    |
| rs10517684 | 4  | 159128895 | 0.3367 | 88.07% | 0.323500 | 0.181900 | 0.04780000 | 0.05237000 | NM_016613       | downstream | 139114 | Hs.567498 | C4orf18  |
| rs2018521  | 21 | 37439134  | 0.4194 | 95.79% | 0.620500 | 0.445200 | 0.04780000 | 0.07018000 | NM_001001894    | intron     | 0      | Hs.368214 | TTC3     |
| rs9319581  | 16 | 81539927  | 0.2800 | 96.49% | 0.549400 | 0.548000 | 0.04782000 | 0.05136000 | NM_001257       | intron     | 0      | Hs.654386 | CDH13    |
| rs7750805  | 6  | 57405705  | 0.1667 | 92.63% | 1.000000 | 0.757800 | 0.04783000 | 0.12610000 | NM_000947       | intron     | 0      | Hs.654580 | PRIM2    |
| rs10485899 | 7  | 77943497  | 0.1023 | 92.63% | 1.000000 | 0.610000 | 0.04784000 | 0.01577000 | NM_012301       | intron     | 0      | Hs.654788 | MAGI2    |
| rs1150648  | 6  | 19038539  | 0.3733 | 77.54% | 0.003910 | 0.067670 | 0.04786000 | 0.14720000 | ENST00000385041 | downstream | 358449 | ---       | ---      |
| rs10507950 | 13 | 84880981  | 0.1522 | 96.84% | 0.644500 | 0.048380 | 0.04788000 | 0.26650000 | ENST00000384285 | downstream | 175903 | ---       | ---      |
| rs2958187  | 18 | 51311341  | 0.3797 | 93.33% | 0.696400 | 1.000000 | 0.04789000 | 0.01290000 | NM_003199       | intron     | 0      | Hs.644653 | TCF4     |
| rs513998   | 20 | 9958393   | 0.1745 | 97.54% | 1.000000 | 1.000000 | 0.04793000 | 0.14360000 | NM_198798       | upstream   | 5304   | Hs.70903  | ANKRD5   |
| rs10501877 | 11 | 97474361  | 0.2108 | 94.04% | 0.855100 | 0.206200 | 0.04794000 | 0.11330000 | ENST00000384812 | downstream | 185262 | ---       | ---      |
| rs1270028  | 10 | 65149421  | 0.0592 | 91.93% | 1.000000 | 1.000000 | 0.04794000 | 0.13820000 | NM_001001330    | downstream | 94534  | Hs.499833 | REEP3    |
| rs4412638  | 1  | 50386263  | 0.2537 | 94.74% | 0.076810 | 0.050250 | 0.04794000 | 0.22720000 | NM_021952       | intron     | 0      | Hs.213050 | ELAVL4   |
| rs6794619  | 3  | 71122585  | 0.1167 | 94.74% | 0.228000 | 0.662700 | 0.04794000 | 0.04258000 | NM_032682       | intron     | 0      | Hs.431498 | FOXP1    |
| rs9306417  | 22 | 24629346  | 0.2537 | 94.74% | 0.748900 | 0.518800 | 0.04794000 | 0.07979000 | NM_032608       | intron     | 0      | Hs.417959 | MYO18B   |
| rs10497612 | 2  | 183225351 | 0.0688 | 94.39% | 0.621700 | 0.616100 | 0.04797000 | 0.01826000 | NM_018981       | upstream   | 63891  | Hs.516632 | DNAJC10  |
| rs10519039 | 15 | 57780050  | 0.0477 | 77.19% | 0.394000 | 0.446300 | 0.04797000 | 0.03273000 | NM_004330       | upstream   | 11240  | Hs.646490 | BNIP2    |
| rs4515397  | 6  | 96711946  | 0.4152 | 97.19% | 0.620500 | 0.174400 | 0.04797000 | 0.16030000 | NM_006581       | intron     | 0      | Hs.49117  | FUT9     |
| rs10494517 | 1  | 177770933 | 0.4068 | 97.89% | 0.106300 | 0.449200 | 0.04798000 | 0.02800000 | NM_182766       | intron     | 0      | Hs.658505 | C1orf125 |
| rs3922569  | 4  | 63297437  | 0.1056 | 88.07% | 0.744500 | 0.299900 | 0.04801000 | 0.15940000 | ENST00000314406 | upstream   | 68534  | ---       | ---      |
| rs9294830  | 6  | 63030582  | 0.0939 | 97.19% | 0.277800 | 0.244700 | 0.04801000 | 0.11070000 | NM_152688       | intron     | 0      | Hs.519794 | KHDRBS2  |
| rs987865   | 11 | 22871411  | 0.1522 | 96.84% | 1.000000 | 0.605600 | 0.04802000 | 0.08371000 | ENST00000354193 | upstream   | 63454  | ---       | ---      |
| rs4476231  | 17 | 50912628  | 0.2798 | 88.42% | 0.209900 | 0.142600 | 0.04803000 | 0.06492000 | NM_012329       | upstream   | 58288  | Hs.463483 | MMD      |
| rs2078535  | 7  | 22983055  | 0.3345 | 96.49% | 0.278200 | 0.258400 | 0.04804000 | 0.11240000 | NM_032581       | intron     | 0      | Hs.85603  | FAM126A  |
| rs788911   | 4  | 73632087  | 0.3226 | 97.89% | 0.784900 | 0.516700 | 0.04805000 | 0.03922000 | NM_014243       | intron     | 0      | Hs.590919 | ADAMTS3  |
| rs10509474 | 10 | 85038324  | 0.0446 | 94.39% | 1.000000 | 1.000000 | 0.04806000 | 0.05077000 | ENST00000363904 | upstream   | 220517 | ---       | ---      |
| rs10510847 | 3  | 60467192  | 0.3662 | 94.39% | 0.895400 | 0.614300 | 0.04806000 | 0.18580000 | NM_002012       | intron     | 0      | Hs.655995 | FHIT     |
| rs1861968  | 7  | 154855160 | 0.2798 | 97.19% | 0.370100 | 0.294400 | 0.04806000 | 0.02182000 | ENST00000389257 | intron     | 0      | ---       | ---      |
| rs1373475  | 4  | 36607819  | 0.0548 | 76.84% | 0.001731 | 0.001972 | 0.04807000 | 0.04074000 | ENST00000389006 | upstream   | 426627 | ---       | ---      |
| rs728123   | 4  | 105784667 | 0.0593 | 88.77% | 1.000000 | 1.000000 | 0.04807000 | 0.02946000 | NM_025212       | upstream   | 149167 | Hs.12248  | CXXC4    |
| rs1159488  | 13 | 77726771  | 0.2770 | 97.54% | 0.880900 | 0.221400 | 0.04809000 | 0.04258000 | ENST00000363816 | downstream | 100594 | ---       | ---      |
| rs10510900 | 3  | 63584070  | 0.4173 | 97.54% | 0.064470 | 0.041890 | 0.04810000 | 0.32710000 | NM_144642       | downstream | 6434   | Hs.648668 | SYNPR    |
| rs10484576 | 6  | 106817124 | 0.2808 | 96.84% | 0.135200 | 0.316000 | 0.04811000 | 0.07181000 | NM_004849       | intron     | 0      | Hs.486063 | ATG5     |
| rs1571590  | 9  | 100923629 | 0.1859 | 94.39% | 0.311200 | 0.170100 | 0.04811000 | 0.03929000 | NM_004612       | intron     | 0      | Hs.494622 | TGFBF1   |
| rs7423932  | 2  | 59803822  | 0.0856 | 92.28% | 0.000967 | 0.161400 | 0.04812000 | 0.25330000 | ENST00000386566 | downstream | 28332  | ---       | ---      |
| rs300064   | 5  | 37061628  | 0.4273 | 96.49% | 0.219900 | 0.752600 | 0.04813000 | 0.00802200 | NM_015384       | intron     | 0      | Hs.481927 | NIPBL    |
| rs10504412 | 8  | 69048188  | 0.3759 | 93.33% | 1.000000 | 0.504800 | 0.04814000 | 0.13190000 | NM_025170       | intron     | 0      | Hs.591867 | DEPDC2   |
| rs10504614 | 8  | 77323739  | 0.1304 | 96.84% | 0.592700 | 0.770500 | 0.04817000 | 0.02411000 | ENST00000383892 | downstream | 16597  | ---       | ---      |
| rs771320   | 2  | 7021617   | 0.2821 | 95.79% | 0.764800 | 1.000000 | 0.04817000 | 0.04114000 | NM_014746       | intron     | 0      | Hs.699230 | RNF144A  |
| rs10484161 | 14 | 82974558  | 0.0809 | 95.44% | 0.688700 | 0.505200 | 0.04821000 | 0.05483000 | ENST00000387648 | downstream | 149570 | ---       | ---      |
| rs7024617  | 9  | 101179261 | 0.0791 | 97.54% | 1.000000 | 1.000000 | 0.04823000 | 0.03538000 | NM_173199       | upstream   | 444697 | Hs.279522 | NR4A3    |
| rs10505672 | 8  | 138343044 | 0.1386 | 93.68% | 0.609900 | 0.399200 | 0.04824000 | 0.03474000 | NM_015912       | downstream | 870664 | Hs.126024 | FAM135B  |
| rs10521263 | 16 | 50870133  | 0.1511 | 97.54% | 0.098850 | 0.067260 | 0.04825000 | 0.18380000 | ENST00000219746 | downstream | 159293 | ---       | ---      |
| rs1955709  | 14 | 39097616  | 0.1511 | 97.54% | 0.479900 | 0.793500 | 0.04825000 | 0.05879000 | NM_203301       | upstream   | 126245 | Hs.324342 | FBXO33   |
| rs1323147  | 13 | 42935235  | 0.3225 | 91.93% | 0.065440 | 0.031140 | 0.04826000 | 0.16710000 | NM_017993       | intron     | 0      | Hs.128258 | ENOX1    |
| rs7200614  | 16 | 50794864  | 0.1756 | 97.89% | 0.036020 | 0.246300 | 0.04827000 | 0.11500000 | ENST00000388816 | downstream | 235777 | ---       | ---      |
| rs459743   | 5  | 122524830 | 0.1038 | 91.23% | 0.496600 | 1.000000 | 0.04829000 | 0.21030000 | ENST00000261364 | intron     | 0      | ---       | ---      |
| rs10512881 | 3  | 134177352 | 0.1604 | 94.04% | 0.822600 | 0.537500 | 0.04834000 | 0.04730000 | NM_023943       | upstream   | 62584  | Hs.191616 | TMEM108  |
| rs1538001  | 13 | 33683068  | 0.3000 | 94.74% | 0.564000 | 0.341000 | 0.04834000 | 0.02273000 | NM_015678       | upstream   | 731388 | Hs.491172 | NBEA     |
| rs9311151  | 3  | 37082134  | 0.0096 | 91.58% | 1.000000 | 1.000000 | 0.04834000 | 0.10360000 | NM_017724       | intron     | 0      | Hs.475319 | LRRFIP2  |
| rs1374491  | 4  | 130188071 | 0.1939 | 92.28% | 0.048310 | 0.503600 | 0.04835000 | 0.16350000 | NM_144643       | intron     | 0      | Hs.654690 | SCLT1    |

|            |    |           |        |        |          |          |            |            |                 |            |         |           |           |
|------------|----|-----------|--------|--------|----------|----------|------------|------------|-----------------|------------|---------|-----------|-----------|
| rs329167   | 5  | 125161941 | 0.2261 | 91.58% | 0.157200 | 0.155200 | 0.04836000 | 0.02283000 | NM_023927       | upstream   | 625059  | Hs.363558 | GRAMD3    |
| rs4057888  | 11 | 123766132 | 0.2760 | 97.89% | 0.232900 | 0.156400 | 0.04839000 | 0.01876000 | NM_001005467    | downstream | 5384    | Hs.690456 | OR8B3     |
| rs6072572  | 20 | 39998232  | 0.2380 | 87.72% | 0.008343 | 0.008037 | 0.04839000 | 0.10950000 | NM_007050       | downstream | 136574  | Hs.526879 | PTPRT     |
| rs10483622 | 14 | 53206281  | 0.1148 | 94.74% | 1.000000 | 1.000000 | 0.04840000 | 0.11480000 | NM_130851       | downstream | 279926  | Hs.68879  | BMP4      |
| rs1845389  | 8  | 119869566 | 0.4209 | 97.54% | 0.806400 | 0.653900 | 0.04841000 | 0.13160000 | NM_002546       | downstream | 135412  | Hs.81791  | TNFRSF11B |
| rs685286   | 11 | 102347662 | 0.2130 | 94.74% | 0.017570 | 0.096090 | 0.04841000 | 0.05550000 | NM_002427       | upstream   | 15990   | Hs.2936   | MMP13     |
| rs3950256  | 2  | 217519913 | 0.4275 | 96.84% | 0.110500 | 0.876200 | 0.04842000 | 0.22010000 | NM_003284       | upstream   | 86886   | Hs.3017   | TNP1      |
| rs6129969  | 20 | 39967987  | 0.1381 | 94.04% | 0.608800 | 1.000000 | 0.04847000 | 0.04634000 | NM_007050       | downstream | 166819  | Hs.526879 | PTPRT     |
| rs17105166 | 5  | 146047763 | 0.1171 | 94.39% | 0.382500 | 0.203600 | 0.04848000 | 0.01434000 | NM_181678       | intron     | 0       | Hs.655213 | PPP2R2B   |
| rs1424038  | 16 | 61521954  | 0.2778 | 97.89% | 0.765400 | 0.691100 | 0.04851000 | 0.04817000 | NM_001797       | downstream | 2016232 | Hs.116471 | CDH11     |
| rs4102214  | 11 | 62969296  | 0.2318 | 91.58% | 0.298700 | 0.815000 | 0.04851000 | 0.15050000 | NM_054108       | downstream | 18090   | Hs.410316 | HRASLS5   |
| rs4310018  | 5  | 152266397 | 0.2818 | 96.49% | 0.882100 | 0.430400 | 0.04852000 | 0.15490000 | NM_000827       | upstream   | 584102  | Hs.519693 | GRIA1     |
| rs1334339  | 1  | 88182865  | 0.3243 | 90.88% | 0.064640 | 0.130100 | 0.04854000 | 0.05705000 | ENST00000362448 | upstream   | 491221  | ---       | ---       |
| rs1893241  | 18 | 21752217  | 0.2575 | 94.04% | 0.749000 | 0.522100 | 0.04855000 | 0.01974000 | NM_005637       | downstream | 98000   | Hs.404263 | SS18      |
| rs10502516 | 18 | 25176204  | 0.2929 | 94.04% | 0.556400 | 0.483000 | 0.04856000 | 0.06502000 | ENST00000384802 | downstream | 145714  | ---       | ---       |
| rs2973519  | 5  | 11131958  | 0.3864 | 92.63% | 0.697400 | 0.868700 | 0.04857000 | 0.08794000 | NM_001332       | intron     | 0       | Hs.314543 | CTNND2    |
| rs10510947 | 3  | 65804384  | 0.4188 | 97.19% | 0.902300 | 0.752000 | 0.04859000 | 0.04733000 | NM_001033057    | intron     | 0       | Hs.651939 | MAGI1     |
| rs1925757  | 13 | 45084977  | 0.2191 | 82.46% | 0.848500 | 1.000000 | 0.04861000 | 0.13020000 | ENST00000298738 | intron     | 0       | ---       | ---       |
| rs4073846  | 1  | 46235468  | 0.4907 | 94.74% | 0.466800 | 0.647900 | 0.04861000 | 0.18100000 | NM_015112       | intron     | 0       | Hs.319481 | MAST2     |
| rs1863702  | 2  | 49714260  | 0.0939 | 97.19% | 0.718500 | 0.465200 | 0.04862000 | 0.06830000 | ENST00000388647 | downstream | 255250  | ---       | ---       |
| rs9322105  | 6  | 148065767 | 0.0939 | 97.19% | 0.718500 | 0.465200 | 0.04862000 | 0.06462000 | NM_001030060    | downstream | 132917  | Hs.567973 | SAMD5     |
| rs716180   | 7  | 134087371 | 0.2703 | 90.88% | 0.207800 | 0.145900 | 0.04864000 | 0.05985000 | NM_033140       | upstream   | 27340   | Hs.490203 | CALD1     |
| rs1498843  | 3  | 69663591  | 0.2593 | 94.04% | 0.205000 | 0.043700 | 0.04865000 | 0.06822000 | NM_198178       | upstream   | 232061  | Hs.166017 | MTF       |
| rs2710831  | 4  | 169645396 | 0.2489 | 77.54% | 0.374500 | 0.468000 | 0.04865000 | 0.11420000 | NM_016081       | upstream   | 9396    | Hs.151220 | PALLD     |
| rs3845641  | 2  | 141563449 | 0.3635 | 95.09% | 0.792900 | 0.274400 | 0.04867000 | 0.03809000 | NM_018557       | intron     | 0       | Hs.656461 | LRP1B     |
| rs10484010 | 14 | 88368041  | 0.1529 | 97.54% | 0.486400 | 0.441000 | 0.04868000 | 0.10380000 | NM_198310       | intron     | 0       | Hs.303055 | TTC8      |
| rs945089   | 1  | 230886240 | 0.4039 | 89.47% | 0.365700 | 0.426700 | 0.04868000 | 0.03004000 | ENST00000366656 | intron     | 0       | ---       | ---       |
| rs10506098 | 12 | 33034204  | 0.3630 | 94.74% | 1.000000 | 1.000000 | 0.04870000 | 0.03288000 | NM_004572       | upstream   | 93211   | Hs.164384 | PKP2      |
| rs706358   | 1  | 56466767  | 0.4889 | 94.74% | 0.807500 | 0.443100 | 0.04871000 | 0.03015000 | NM_177414       | downstream | 265760  | Hs.405156 | PPAP2B    |
| rs10512873 | 3  | 133842102 | 0.0448 | 94.04% | 0.416500 | 1.000000 | 0.04872000 | 0.06963000 | NM_032169       | intron     | 0       | Hs.441378 | ACAD11    |
| rs2320127  | 16 | 63340114  | 0.3206 | 91.93% | 0.395600 | 0.581500 | 0.04872000 | 0.14360000 | NM_001797       | downstream | 198072  | Hs.116471 | CDH11     |
| rs9318422  | 13 | 75813311  | 0.1324 | 83.51% | 0.149500 | 0.686800 | 0.04872000 | 0.02969000 | NM_138444       | downstream | 538991  | Hs.693617 | KCTD12    |
| rs1986413  | 11 | 94077583  | 0.3273 | 97.54% | 0.275500 | 0.719700 | 0.04873000 | 0.08079000 | NM_130847       | upstream   | 63602   | Hs.503594 | AMOTL1    |
| rs891552   | 11 | 94101220  | 0.3273 | 97.54% | 0.275500 | 0.719700 | 0.04873000 | 0.07942000 | NM_130847       | upstream   | 39965   | Hs.503594 | AMOTL1    |
| rs960297   | 6  | 120942274 | 0.4263 | 97.54% | 0.461700 | 0.365800 | 0.04873000 | 0.07807000 | ENST00000384130 | upstream   | 53029   | ---       | ---       |
| rs1900451  | 10 | 55347706  | 0.2055 | 96.49% | 1.000000 | 1.000000 | 0.04875000 | 0.10350000 | NM_033056       | intron     | 0       | Hs.672170 | PCDH15    |
| rs340199   | 4  | 86569707  | 0.2383 | 97.19% | 0.412400 | 0.440900 | 0.04875000 | 0.04723000 | NM_001042669    | upstream   | 500743  | Hs.444229 | ARHGAP24  |
| rs10490596 | 2  | 207887764 | 0.3280 | 97.89% | 0.058010 | 0.103900 | 0.04876000 | 0.14820000 | NM_003709       | upstream   | 149087  | Hs.471221 | KLF7      |
| rs10510083 | 10 | 122674515 | 0.1642 | 92.98% | 0.656700 | 1.000000 | 0.04876000 | 0.07794000 | ENST00000369065 | intron     | 0       | ---       | ---       |
| rs10510885 | 3  | 62637152  | 0.1123 | 96.84% | 0.359900 | 0.198800 | 0.04877000 | 0.11540000 | NM_183393       | intron     | 0       | Hs.654933 | CADPS     |
| rs4800933  | 18 | 51580839  | 0.3019 | 94.74% | 0.385600 | 0.735400 | 0.04879000 | 0.06867000 | NM_003199       | upstream   | 173981  | Hs.644653 | TCF4      |
| rs1503086  | 3  | 106285667 | 0.2528 | 95.09% | 1.000000 | 0.385200 | 0.04880000 | 0.09698000 | NM_001627       | upstream   | 282736  | Hs.591293 | ALCAM     |
| rs9297181  | 8  | 29996147  | 0.1523 | 97.89% | 0.485400 | 1.000000 | 0.04880000 | 0.01088000 | ENST00000387787 | downstream | 24726   | ---       | ---       |
| rs2014366  | 2  | 235393894 | 0.0139 | 88.42% | 1.000000 | 1.000000 | 0.04881000 | 0.05740000 | NM_014521       | upstream   | 158174  | Hs.516777 | SH3BP4    |
| rs10483763 | 14 | 62636534  | 0.4314 | 97.19% | 0.393400 | 0.651000 | 0.04883000 | 0.09797000 | NM_172375       | upstream   | 54825   | Hs.27043  | KCNH5     |
| rs10495539 | 2  | 6706226   | 0.0540 | 97.54% | 1.000000 | 1.000000 | 0.04884000 | 0.01863000 | NM_001001695    | downstream | 80557   | ---       | FLJ42418  |
| rs10506863 | 12 | 80977957  | 0.0540 | 97.54% | 0.562500 | 1.000000 | 0.04884000 | 0.06075000 | NM_014167       | downstream | 292798  | Hs.582627 | CCDC59    |
| rs10494435 | 1  | 163442188 | 0.2584 | 94.39% | 0.525100 | 0.831100 | 0.04888000 | 0.22270000 | NM_001033507    | intron     | 0       | Hs.667312 | LMX1A     |
| rs10502126 | 11 | 110423186 | 0.0093 | 94.39% | 1.000000 | 1.000000 | 0.04889000 | 0.09352000 | NM_198498       | upstream   | 208731  | Hs.298685 | C11orf53  |
| rs10517988 | 4  | 67184679  | 0.1265 | 59.65% | 0.000000 | 0.000231 | 0.04889000 | 0.30450000 | ENST00000339867 | downstream | 541842  | ---       | ---       |
| rs10494674 | 1  | 191359364 | 0.3011 | 94.39% | 0.563100 | 0.608300 | 0.04890000 | 0.05372000 | NM_024529       | intron     | 0       | Hs.576497 | CDC73     |
| rs1456991  | 14 | 97558657  | 0.0280 | 94.04% | 1.000000 | 1.000000 | 0.04892000 | 0.01783000 | ENST00000380268 | upstream   | 259736  | ---       | ---       |
| rs1907091  | 4  | 158822236 | 0.2088 | 95.79% | 0.713800 | 1.000000 | 0.04892000 | 0.07678000 | NM_000826       | downstream | 315559  | Hs.32763  | GRIA2     |
| rs10505201 | 8  | 114295819 | 0.1410 | 93.33% | 0.072390 | 0.174100 | 0.04894000 | 0.05754000 | NM_052900       | intron     | 0       | Hs.91381  | CSMD3     |

|            |    |           |        |        |          |          |            |            |                 |            |         |           |          |
|------------|----|-----------|--------|--------|----------|----------|------------|------------|-----------------|------------|---------|-----------|----------|
| rs10482977 | 21 | 27014402  | 0.1111 | 97.89% | 0.126000 | 0.089390 | 0.04895000 | 0.14070000 | NM_006988       | downstream | 116077  | Hs.643357 | ADAMTS1  |
| rs2149814  | 9  | 10885645  | 0.1111 | 97.89% | 0.221300 | 0.047270 | 0.04895000 | 0.01492000 | ENST00000364783 | downstream | 1404625 | ---       | ---      |
| rs1568050  | 12 | 60077380  | 0.0095 | 92.28% | 1.000000 | 1.000000 | 0.04898000 | 0.06472000 | NM_178539       | downstream | 310942  | Hs.269745 | FAM19A2  |
| rs7754169  | 6  | 91370279  | 0.3759 | 94.74% | 0.439600 | 0.323200 | 0.04899000 | 0.17760000 | NM_145333       | upstream   | 16651   | Hs.644143 | MAP3K7   |
| rs7515996  | 1  | 192591449 | 0.0953 | 97.54% | 0.724100 | 1.000000 | 0.04900000 | 0.03199000 | ENST00000385495 | downstream | 132407  | ---       | ---      |
| rs9293956  | 6  | 63510535  | 0.3708 | 95.09% | 0.696100 | 0.532400 | 0.04904000 | 0.01910000 | ENST00000384941 | upstream   | 59403   | ---       | ---      |
| rs10491406 | 5  | 162909423 | 0.0935 | 97.54% | 0.486600 | 0.701900 | 0.04906000 | 0.00877700 | NM_182796       | downstream | 30519   | Hs.696057 | MAT2B    |
| rs17088462 | 4  | 58190120  | 0.1031 | 91.93% | 0.495400 | 1.000000 | 0.04907000 | 0.05377000 | ENST00000387903 | upstream   | 136824  | ---       | ---      |
| rs1321464  | 20 | 52465664  | 0.1605 | 95.09% | 0.651500 | 1.000000 | 0.04910000 | 0.12490000 | NM_018431       | upstream   | 59924   | Hs.656582 | DOK5     |
| rs7608543  | 2  | 36416477  | 0.3787 | 94.04% | 0.603800 | 0.349600 | 0.04912000 | 0.03656000 | NM_016441       | upstream   | 20096   | Hs.699247 | CRIM1    |
| rs10485562 | 20 | 16688575  | 0.1733 | 52.63% | 1.000000 | 0.417100 | 0.04913000 | 0.01302000 | NM_020157       | downstream | 7766    | Hs.41119  | OTOR     |
| rs1121946  | 8  | 129234380 | 0.1917 | 93.33% | 0.845500 | 0.582200 | 0.04917000 | 0.02909000 | ENST00000364912 | upstream   | 67552   | ---       | ---      |
| rs2374544  | 12 | 104659538 | 0.3007 | 95.09% | 0.471700 | 0.036260 | 0.04918000 | 0.05916000 | NM_014840       | downstream | 321717  | Hs.524692 | NUAK1    |
| rs10498999 | 6  | 96776326  | 0.4209 | 97.54% | 0.538300 | 0.174100 | 0.04919000 | 0.09248000 | NM_006581       | downstream | 15849   | Hs.49117  | FUT9     |
| rs7713115  | 5  | 86607880  | 0.4739 | 87.37% | 0.056460 | 0.110800 | 0.04921000 | 0.08650000 | NM_022650       | intron     | 0       | Hs.695926 | RASA1    |
| rs10511610 | 9  | 15262462  | 0.0685 | 76.84% | 1.000000 | 1.000000 | 0.04922000 | 0.06289000 | NM_152574       | intron     | 0       | Hs.563630 | C9orf52  |
| rs10506656 | 12 | 71247495  | 0.2220 | 94.04% | 0.077450 | 0.001088 | 0.04923000 | 0.04309000 | NM_013381       | intron     | 0       | Hs.199814 | TRHDE    |
| rs4688284  | 3  | 62062420  | 0.0789 | 97.89% | 0.393100 | 1.000000 | 0.04923000 | 0.04448000 | NM_002841       | intron     | 0       | Hs.654488 | PTPRG    |
| rs17622017 | 1  | 192607831 | 0.0731 | 91.23% | 0.143000 | 0.410700 | 0.04924000 | 0.13650000 | ENST00000385495 | downstream | 116025  | ---       | ---      |
| rs2214586  | 7  | 11591954  | 0.1007 | 94.04% | 0.738500 | 1.000000 | 0.04927000 | 0.15470000 | ENST00000262042 | intron     | 0       | ---       | ---      |
| rs248257   | 5  | 179341142 | 0.3628 | 75.44% | 0.001867 | 0.002112 | 0.04928000 | 0.05596000 | NM_018434       | intron     | 0       | Hs.484363 | RNF130   |
| rs1903991  | 10 | 53570878  | 0.2076 | 97.19% | 0.714800 | 0.455200 | 0.04929000 | 0.16860000 | NM_006258       | intron     | 0       | Hs.654556 | PRKG1    |
| rs7149815  | 14 | 81417277  | 0.0806 | 95.79% | 0.396800 | 0.505200 | 0.04929000 | 0.07754000 | NM_005065       | upstream   | 347391  | Hs.181300 | SEL1L    |
| rs1434611  | 4  | 162937760 | 0.3102 | 93.33% | 0.318700 | 0.500900 | 0.04930000 | 0.08808000 | NM_020116       | intron     | 0       | Hs.591707 | FSTL5    |
| rs669233   | 11 | 93669262  | 0.4293 | 96.84% | 0.390400 | 0.762100 | 0.04930000 | 0.05227000 | NM_015368       | downstream | 114481  | Hs.591976 | PANX1    |
| rs1922296  | 2  | 102189311 | 0.2401 | 97.89% | 0.744200 | 1.000000 | 0.04932000 | 0.02976000 | NM_003854       | intron     | 0       | Hs.659863 | IL1RL2   |
| rs2642002  | 9  | 582718    | 0.2401 | 97.89% | 0.001653 | 0.003097 | 0.04932000 | 0.19790000 | NM_015158       | intron     | 0       | Hs.306764 | ANKRD15  |
| rs4977879  | 9  | 23659371  | 0.2401 | 97.89% | 0.249400 | 0.501700 | 0.04932000 | 0.04689000 | NM_004432       | downstream | 22438   | Hs.166109 | ELAVL2   |
| rs10509698 | 10 | 97782342  | 0.0542 | 97.19% | 1.000000 | 1.000000 | 0.04933000 | 0.10240000 | NM_001001732    | 3UTR       | 0       | Hs.652240 | CC2D2B   |
| rs6715726  | 2  | 195874055 | 0.1534 | 97.19% | 0.247800 | 0.084870 | 0.04933000 | 0.17270000 | ENST00000365336 | upstream   | 212952  | ---       | ---      |
| rs10493922 | 1  | 100692376 | 0.1370 | 94.74% | 0.065220 | 0.048850 | 0.04934000 | 0.10280000 | NM_033313       | intron     | 0       | Hs.127411 | CDC14A   |
| rs4597125  | 12 | 74694839  | 0.0942 | 96.84% | 0.486300 | 0.602500 | 0.04934000 | 0.18690000 | NM_007350       | downstream | 15744   | Hs.602085 | PHLDA1   |
| rs817429   | 1  | 85408319  | 0.1370 | 94.74% | 0.037940 | 0.084040 | 0.04934000 | 0.02718000 | ENST00000341460 | intron     | 0       | ---       | ---      |
| rs1984067  | 9  | 104452452 | 0.1577 | 84.56% | 0.146000 | 0.055990 | 0.04936000 | 0.14910000 | ENST00000374800 | intron     | 0       | ---       | ---      |
| rs9294148  | 6  | 80265632  | 0.1904 | 83.86% | 0.089800 | 0.039650 | 0.04936000 | 0.01584000 | NM_181714       | intron     | 0       | Hs.21945  | LCA5     |
| rs10508279 | 10 | 4290734   | 0.1617 | 94.39% | 0.653000 | 0.803100 | 0.04937000 | 0.34840000 | NM_001300       | upstream   | 473267  | Hs.4055   | KLF6     |
| rs2291498  | 3  | 56633911  | 0.1617 | 94.39% | 0.178700 | 0.134600 | 0.04937000 | 0.04565000 | NM_015224       | CDS        | 0       | Hs.116877 | C3orf63  |
| rs1487377  | 18 | 20137550  | 0.1636 | 94.39% | 1.000000 | 1.000000 | 0.04938000 | 0.10200000 | NM_080597       | intron     | 0       | Hs.370725 | OSBPL1A  |
| rs200790   | 12 | 97791214  | 0.2381 | 81.05% | 0.017210 | 0.138100 | 0.04938000 | 0.16330000 | NM_020140       | intron     | 0       | Hs.506458 | ANKS1B   |
| rs10496823 | 2  | 140035465 | 0.0996 | 93.33% | 0.731900 | 0.711300 | 0.04940000 | 0.04828000 | ENST00000384174 | downstream | 49870   | ---       | ---      |
| rs1562533  | 3  | 105328962 | 0.0449 | 93.68% | 0.417700 | 1.000000 | 0.04943000 | 0.18960000 | ENST00000388643 | downstream | 33252   | ---       | ---      |
| rs1825478  | 12 | 26529224  | 0.2326 | 90.53% | 0.002622 | 0.026590 | 0.04945000 | 0.17190000 | NM_002223       | intron     | 0       | Hs.512235 | ITPR2    |
| rs10483361 | 14 | 30343066  | 0.1429 | 93.33% | 0.317100 | 1.000000 | 0.04947000 | 0.14960000 | NM_182835       | downstream | 68297   | Hs.369168 | SCFD1    |
| rs8046846  | 16 | 78392110  | 0.0455 | 92.63% | 0.011150 | 0.152100 | 0.04947000 | 0.30900000 | NM_001031804    | upstream   | 199998  | Hs.134859 | MAF      |
| rs1491520  | 3  | 193243145 | 0.0964 | 96.49% | 0.294400 | 1.000000 | 0.04948000 | 0.02929000 | ENST00000364513 | upstream   | 50460   | ---       | ---      |
| rs7731154  | 5  | 162178752 | 0.4963 | 95.44% | 0.395700 | 0.880300 | 0.04948000 | 0.04568000 | NM_199246       | upstream   | 618403  | Hs.79101  | CCNG1    |
| rs7963098  | 12 | 51406976  | 0.2061 | 97.89% | 0.463200 | 0.533400 | 0.04949000 | 0.18720000 | NM_175078       | upstream   | 23462   | Hs.334989 | KRT77    |
| rs10488979 | 4  | 13984477  | 0.0092 | 95.09% | 1.000000 | 1.000000 | 0.04951000 | 0.06345000 | NM_148894       | upstream   | 746032  | Hs.444517 | FAM44A   |
| rs10502125 | 11 | 110422773 | 0.0092 | 95.09% | 1.000000 | 1.000000 | 0.04951000 | 0.09463000 | NM_198498       | upstream   | 209144  | Hs.298685 | C11orf53 |
| rs10508156 | 13 | 104676816 | 0.0092 | 95.09% | 1.000000 | 1.000000 | 0.04951000 | 0.12390000 | NM_172370       | upstream   | 239777  | Hs.381382 | DAOA     |
| rs1524476  | 7  | 115436045 | 0.0092 | 95.09% | 1.000000 | 1.000000 | 0.04951000 | 0.07315000 | NM_001018058    | intron     | 0       | Hs.125962 | TPEC     |
| rs6996396  | 8  | 33097918  | 0.0092 | 95.09% | 1.000000 | 1.000000 | 0.04951000 | 0.05936000 | ENST00000387861 | upstream   | 103601  | ---       | ---      |
| rs10489358 | 1  | 166921497 | 0.2196 | 95.09% | 0.158600 | 0.333700 | 0.04952000 | 0.03162000 | NM_001937       | downstream | 9824    | Hs.80552  | DPT      |
| rs10496840 | 2  | 140767078 | 0.3037 | 84.91% | 0.047750 | 0.109400 | 0.04952000 | 0.04512000 | NM_018557       | intron     | 0       | Hs.656461 | LRP1B    |



|            |    |           |        |        |          |          |            |            |                 |            |        |           |           |
|------------|----|-----------|--------|--------|----------|----------|------------|------------|-----------------|------------|--------|-----------|-----------|
| rs10492156 | 12 | 14710038  | 0.0109 | 80.70% | 0.021710 | 1.000000 | 0.04953000 | 0.14910000 | NM_004963       | intron     | 0      | Hs.524278 | GUCY2C    |
| rs912171   | 9  | 646765    | 0.1198 | 92.28% | 0.232900 | 0.334500 | 0.04953000 | 0.04004000 | NM_015158       | intron     | 0      | Hs.306764 | ANKRD15   |
| rs10495459 | 1  | 238382591 | 0.4435 | 80.70% | 0.349400 | 0.738000 | 0.04954000 | 0.21820000 | NM_020066       | intron     | 0      | ---       | FMN2      |
| rs1366669  | 8  | 15513049  | 0.2076 | 97.19% | 0.584900 | 0.146700 | 0.04954000 | 0.01504000 | NM_178234       | intron     | 0      | Hs.591845 | TUSC3     |
| rs1635516  | 1  | 240131955 | 0.2076 | 97.19% | 0.584900 | 0.836300 | 0.04954000 | 0.08641000 | NM_003686       | downstream | 12091  | Hs.498248 | EXO1      |
| rs530723   | 9  | 109779657 | 0.3460 | 96.84% | 1.000000 | 0.751500 | 0.04955000 | 0.05976000 | ENST00000297812 | upstream   | 142726 | ---       | ---       |
| rs10503965 | 8  | 34642766  | 0.2363 | 89.82% | 0.117800 | 0.354000 | 0.04956000 | 0.20860000 | NM_080872       | upstream   | 878686 | Hs.238889 | UNC5D     |
| rs10490242 | 2  | 50168999  | 0.2814 | 97.89% | 0.377100 | 0.599600 | 0.04957000 | 0.18940000 | NM_138735       | intron     | 0      | Hs.637685 | NRXN1     |
| rs2421802  | 2  | 126387856 | 0.1034 | 91.58% | 0.744500 | 0.721700 | 0.04957000 | 0.05183000 | NM_016815       | upstream   | 776688 | Hs.59138  | GYPC      |
| rs10490987 | 10 | 117679868 | 0.2086 | 97.54% | 0.585200 | 0.836700 | 0.04958000 | 0.06200000 | NM_207303       | intron     | 0      | Hs.501127 | ATRNLI    |
| rs1536170  | 1  | 65551917  | 0.2086 | 97.54% | 0.279000 | 0.210500 | 0.04958000 | 0.02964000 | NM_014787       | intron     | 0      | Hs.647643 | DNAJC6    |
| rs2041739  | 2  | 102360765 | 0.4265 | 97.89% | 0.086300 | 0.099900 | 0.04958000 | 0.37890000 | NM_003855       | intron     | 0      | Hs.469521 | IL18R1    |
| rs802424   | 7  | 86132630  | 0.2410 | 97.54% | 0.745000 | 0.377100 | 0.04960000 | 0.21120000 | NM_000840       | intron     | 0      | Hs.590575 | GRM3      |
| rs521693   | 6  | 93930690  | 0.2593 | 94.74% | 0.266000 | 0.203300 | 0.04962000 | 0.22530000 | NM_004440       | downstream | 77174  | Hs.73962  | EPHA7     |
| rs10484368 | 6  | 18471817  | 0.1280 | 89.12% | 0.019520 | 0.027350 | 0.04963000 | 0.03099000 | NM_182757       | upstream   | 23756  | Hs.148741 | RNF144B   |
| rs12644496 | 4  | 152324798 | 0.1221 | 90.53% | 1.000000 | 1.000000 | 0.04965000 | 0.03634000 | NM_001009555    | intron     | 0      | Hs.567725 | SH3D19    |
| rs258759   | 5  | 142536786 | 0.1825 | 96.14% | 0.687400 | 0.494500 | 0.04965000 | 0.09363000 | NM_015071       | intron     | 0      | Hs.654668 | ARHGAP26  |
| rs10494395 | 1  | 161894333 | 0.0717 | 92.98% | 1.000000 | 1.000000 | 0.04966000 | 0.05108000 | ENST00000385703 | downstream | 148347 | ---       | ---       |
| rs962222   | 1  | 92743541  | 0.1423 | 93.68% | 1.000000 | 0.788700 | 0.04966000 | 0.01397000 | NM_005665       | downstream | 3300   | Hs.656836 | EV15      |
| rs10514137 | 18 | 70522812  | 0.1350 | 96.14% | 0.191100 | 0.702800 | 0.04967000 | 0.21590000 | NM_017757       | intron     | 0      | Hs.536490 | ZNF407    |
| rs2484749  | 1  | 39531542  | 0.2101 | 96.84% | 0.585400 | 1.000000 | 0.04967000 | 0.06927000 | NM_012090       | intron     | 0      | Hs.580782 | MACF1     |
| rs2862078  | 3  | 154695022 | 0.4690 | 96.14% | 0.395700 | 0.361000 | 0.04967000 | 0.07046000 | ENST00000383016 | intron     | 0      | ---       | ---       |
| rs10505294 | 8  | 118613249 | 0.2222 | 94.74% | 1.000000 | 1.000000 | 0.04968000 | 0.02211000 | NM_080651       | intron     | 0      | Hs.492612 | MED30     |
| rs3211830  | 7  | 80117654  | 0.1352 | 85.61% | 0.782900 | 1.000000 | 0.04968000 | 0.02052000 | NM_000072       | intron     | 0      | Hs.120949 | CD36      |
| rs6938648  | 6  | 3954503   | 0.2326 | 80.70% | 0.042640 | 0.287000 | 0.04968000 | 0.34010000 | ENST00000366365 | downstream | 4485   | ---       | ---       |
| rs10511668 | 9  | 19012470  | 0.4386 | 97.19% | 0.626500 | 1.000000 | 0.04970000 | 0.05012000 | NM_153707       | intron     | 0      | Hs.98943  | C9orf138  |
| rs9321092  | 6  | 127856574 | 0.2613 | 93.33% | 0.528900 | 0.853600 | 0.04971000 | 0.15290000 | NM_001012279    | intron     | 0      | Hs.319247 | C6orf174  |
| rs10520985 | 5  | 31560322  | 0.4564 | 96.49% | 0.903300 | 0.548700 | 0.04972000 | 0.06233000 | NM_013235       | intron     | 0      | Hs.97997  | RNASEN    |
| rs9287517  | 2  | 139874529 | 0.1199 | 93.68% | 1.000000 | 1.000000 | 0.04972000 | 0.05781000 | ENST00000384174 | upstream   | 110935 | ---       | ---       |
| rs10520007 | 5  | 128180413 | 0.0858 | 94.04% | 0.423400 | 0.566500 | 0.04973000 | 0.09651000 | NM_014031       | upstream   | 148307 | Hs.49765  | SLC27A6   |
| rs9378878  | 6  | 4397665   | 0.0709 | 94.04% | 0.629100 | 0.401300 | 0.04973000 | 0.05053000 | NM_001011540    | upstream   | 158180 | ---       | KU-MEL-3  |
| rs927180   | 6  | 63572152  | 0.4451 | 89.47% | 0.001546 | 0.006259 | 0.04974000 | 0.06758000 | ENST00000384941 | upstream   | 121020 | ---       | ---       |
| rs972246   | 7  | 8551314   | 0.2346 | 91.23% | 0.225500 | 0.102300 | 0.04974000 | 0.12810000 | NM_152745       | upstream   | 205849 | Hs.487564 | NXP1      |
| rs10509128 | 10 | 61721033  | 0.2930 | 95.79% | 0.381000 | 0.732000 | 0.04976000 | 0.03793000 | NM_020987       | intron     | 0      | Hs.499725 | ANK3      |
| rs10509573 | 10 | 91179201  | 0.1184 | 93.33% | 0.552200 | 0.205300 | 0.04977000 | 0.12420000 | NM_213606       | downstream | 1552   | Hs.530338 | SLC16A12  |
| rs9326370  | 11 | 65748584  | 0.4779 | 87.37% | 0.022200 | 0.076600 | 0.04977000 | 0.04082000 | NM_018026       | intron     | 0      | Hs.644326 | PACS1     |
| rs997934   | 10 | 1785194   | 0.2741 | 90.88% | 0.160700 | 0.682900 | 0.04977000 | 0.13000000 | NM_018702       | upstream   | 15524  | Hs.657984 | ADARB2    |
| rs10506025 | 12 | 27617637  | 0.3170 | 92.98% | 0.776400 | 0.616600 | 0.04978000 | 0.09424000 | NM_177444       | intron     | 0      | Hs.172445 | PPFIBP1   |
| rs2291385  | 6  | 159104665 | 0.0279 | 94.39% | 0.181800 | 1.000000 | 0.04978000 | 0.07624000 | NM_001009991    | intron     | 0      | Hs.436977 | SYTL3     |
| rs1605714  | 5  | 98064521  | 0.0285 | 92.28% | 0.013890 | 1.000000 | 0.04979000 | 0.07146000 | NM_173670       | upstream   | 68379  | Hs.526902 | RGMB      |
| rs1828674  | 12 | 129035565 | 0.1137 | 97.19% | 0.063940 | 0.647400 | 0.04979000 | 0.25930000 | NM_133448       | upstream   | 81728  | Hs.507268 | TMEM132D  |
| rs9323293  | 14 | 56024440  | 0.1557 | 95.79% | 0.353900 | 0.316600 | 0.04979000 | 0.16010000 | NM_017799       | upstream   | 91824  | Hs.497253 | C14orf101 |
| rs10518078 | 4  | 71838557  | 0.0701 | 95.09% | 0.378100 | 1.000000 | 0.04980000 | 0.09024000 | NM_014961       | intron     | 0      | Hs.7972   | RUFY3     |
| rs2823527  | 21 | 16270439  | 0.0701 | 95.09% | 0.378100 | 1.000000 | 0.04980000 | 0.13880000 | NM_013396       | downstream | 96191  | Hs.473370 | USP25     |
| rs10514020 | 18 | 67537751  | 0.0978 | 95.09% | 0.728400 | 1.000000 | 0.04981000 | 0.05875000 | NM_182511       | downstream | 817144 | Hs.569851 | CBLN2     |
| rs7751261  | 6  | 5486393   | 0.1818 | 96.49% | 0.108400 | 0.146400 | 0.04981000 | 0.03544000 | NM_006567       | intron     | 0      | Hs.484547 | FARS2     |
| rs10491068 | 10 | 97946892  | 0.0538 | 97.89% | 1.000000 | 1.000000 | 0.04982000 | 0.10190000 | NM_013314       | intron     | 0      | Hs.665244 | BLNK      |
| rs1547167  | 13 | 42144097  | 0.0099 | 88.77% | 0.019740 | 1.000000 | 0.04982000 | 0.20020000 | NM_033012       | downstream | 64789  | Hs.333791 | TNFSF11   |
| rs1676965  | 8  | 4560250   | 0.0538 | 97.89% | 1.000000 | 1.000000 | 0.04982000 | 0.01937000 | ENST00000383934 | downstream | 412959 | ---       | ---       |
| rs4456365  | 13 | 96616515  | 0.0538 | 97.89% | 0.561100 | 1.000000 | 0.04982000 | 0.12220000 | NM_207304       | upstream   | 56094  | Hs.657347 | MBNL2     |
| rs2421528  | 5  | 159948254 | 0.3745 | 93.68% | 0.361600 | 0.611400 | 0.04984000 | 0.17570000 | ENST00000327245 | intron     | 0      | ---       | ---       |
| rs10512057 | 9  | 78790963  | 0.4319 | 97.89% | 0.627100 | 0.454500 | 0.04985000 | 0.09614000 | NM_001013735    | upstream   | 33428  | Hs.553843 | FOXB2     |
| rs6472776  | 8  | 74530495  | 0.1540 | 96.84% | 0.018230 | 0.085400 | 0.04985000 | 0.16370000 | ENST00000343268 | intron     | 0      | ---       | ---       |
| rs10484764 | 6  | 131628795 | 0.0728 | 89.12% | 1.000000 | 1.000000 | 0.04986000 | 0.02530000 | NM_016377       | intron     | 0      | Hs.486483 | AKAP7     |

|            |    |           |        |        |          |          |            |            |                 |            |        |           |         |
|------------|----|-----------|--------|--------|----------|----------|------------|------------|-----------------|------------|--------|-----------|---------|
| rs1420984  | 16 | 49966235  | 0.0957 | 97.19% | 0.724700 | 1.000000 | 0.04986000 | 0.00308600 | NM_002968       | upstream   | 223582 | Hs.135787 | SALL1   |
| rs2700169  | 12 | 70301317  | 0.4083 | 84.21% | 0.790200 | 1.000000 | 0.04988000 | 0.08678000 | NM_144982       | intron     | 0      | Hs.527874 | CCDC131 |
| rs6557512  | 6  | 157242759 | 0.2239 | 94.04% | 0.379500 | 0.814800 | 0.04988000 | 0.20300000 | NM_175863       | intron     | 0      | Hs.291587 | ARID1B  |
| rs6848573  | 4  | 182523529 | 0.2528 | 95.09% | 0.259400 | 0.078620 | 0.04988000 | 0.22260000 | ENST00000378957 | upstream   | 157278 | ---       | ---     |
| rs10500902 | 11 | 21242404  | 0.0800 | 96.49% | 0.080110 | 0.503100 | 0.04989000 | 0.07811000 | NM_006157       | intron     | 0      | Hs.657172 | NELL1   |
| rs10514623 | 2  | 108329924 | 0.0800 | 96.49% | 0.019810 | 0.020150 | 0.04989000 | 0.04070000 | NM_006588       | upstream   | 30929  | Hs.312644 | SULT1C4 |
| rs4129740  | 8  | 121902146 | 0.3406 | 96.84% | 0.893400 | 0.860600 | 0.04989000 | 0.13080000 | NM_021021       | upstream   | 8882   | Hs.655236 | SNTB1   |
| rs10511162 | 3  | 98853627  | 0.0578 | 94.04% | 0.601700 | 1.000000 | 0.04990000 | 0.16370000 | ENST00000389672 | intron     | 0      | ---       | ---     |
| rs1911361  | 10 | 67976917  | 0.0578 | 94.04% | 0.212500 | 1.000000 | 0.04990000 | 0.03979000 | NM_013266       | intron     | 0      | Hs.660362 | CTNNA3  |
| rs10501020 | 11 | 25686881  | 0.2079 | 97.89% | 0.717200 | 0.613500 | 0.04992000 | 0.07155000 | NM_031418       | upstream   | 622666 | Hs.91791  | TMEM16C |
| rs2388557  | 10 | 3181527   | 0.3745 | 95.09% | 0.796200 | 0.758100 | 0.04992000 | 0.04888000 | NM_014889       | intron     | 0      | Hs.528300 | PITRM1  |
| rs2778961  | 10 | 20603224  | 0.2832 | 97.89% | 0.055020 | 0.171200 | 0.04992000 | 0.09928000 | NM_032812       | intron     | 0      | Hs.658134 | PLXDC2  |
| rs7549499  | 1  | 83790546  | 0.2832 | 97.89% | 1.000000 | 1.000000 | 0.04992000 | 0.02485000 | NM_024686       | downstream | 312753 | Hs.445826 | TTLL7   |
| rs7672957  | 4  | 12269913  | 0.4072 | 92.63% | 0.373700 | 0.421900 | 0.04992000 | 0.05919000 | ENST00000387175 | downstream | 346501 | ---       | ---     |
| rs10507674 | 13 | 61332602  | 0.0549 | 95.79% | 0.185600 | 0.022710 | 0.04994000 | 0.01950000 | ENST00000387130 | upstream   | 202391 | ---       | ---     |
| rs1041044  | 10 | 10644387  | 0.3081 | 95.09% | 0.671300 | 0.866700 | 0.04996000 | 0.07709000 | NM_001025077    | upstream   | 603069 | Hs.309288 | CUGBP2  |
| rs9325098  | 5  | 147807631 | 0.2659 | 93.68% | 0.875900 | 1.000000 | 0.04996000 | 0.02464000 | NM_001040174    | downstream | 3241   | Hs.483773 | HTR4    |
