# Supplementary material for: Identification of Diabetic Retinopathy Genes through a Genome-Wide Association Study among Mexican-Americans from Starr County, Texas
Source: Hindawi journal article supplement (doi:10.1155/2010/861291), 2010-01-01
Supplement: f4 [file 861291.f4.pdf]

**Supplementary Table 2. Imputation quality of SNP markers used in MACH**

| chr          | # of SNPs<br>in original<br>Affymetrix<br>100K set | # of SNPs used for<br>imputation from<br>Affymetrix 100K<br>set after QC | # of SNPs<br>available from<br>HapMap3<br>MXL | # of SNPs<br>imputed from<br>HapMap III<br>MXL | MACH<br>estimated per<br>allele imputation<br>error rate | # of imputed<br>SNPs with<br>MAF>1% | MACH<br>imputation<br>$r^2 \geq 0.5$ | %      |
|--------------|----------------------------------------------------|--------------------------------------------------------------------------|-----------------------------------------------|------------------------------------------------|----------------------------------------------------------|-------------------------------------|--------------------------------------|--------|
| 1            | 9,165                                              | 8,403                                                                    | 116,415                                       | 111,422                                        | 8.54%                                                    | 96,923                              | 35,010                               | 36.12% |
| 2            | 10,309                                             | 9,545                                                                    | 116,430                                       | 110,965                                        | 8.03%                                                    | 97,475                              | 39,557                               | 40.58% |
| 3            | 7,798                                              | 7,256                                                                    | 96,537                                        | 92,265                                         | 8.36%                                                    | 81,578                              | 30,324                               | 37.17% |
| 4            | 8,537                                              | 7,795                                                                    | 85,772                                        | 81,382                                         | 8.50%                                                    | 71,673                              | 30,032                               | 41.90% |
| 5            | 8,329                                              | 7,769                                                                    | 87,919                                        | 83,421                                         | 8.40%                                                    | 74,099                              | 31,645                               | 42.71% |
| 6            | 8,040                                              | 7,565                                                                    | 91,357                                        | 87,239                                         | 8.22%                                                    | 78,260                              | 32,845                               | 41.97% |
| 7            | 7,023                                              | 6,589                                                                    | 75,320                                        | 71,610                                         | 8.18%                                                    | 64,135                              | 24,313                               | 37.91% |
| 8            | 6,946                                              | 6,411                                                                    | 75,272                                        | 71,782                                         | 7.99%                                                    | 63,568                              | 25,086                               | 39.46% |
| 9            | 4,768                                              | 4,429                                                                    | 63,612                                        | 61,032                                         | 9.22%                                                    | 54,610                              | 17,868                               | 32.72% |
| 10           | 5,656                                              | 5,306                                                                    | 73,832                                        | 70,715                                         | 8.56%                                                    | 63,642                              | 22,616                               | 35.54% |
| 11           | 5,338                                              | 4,942                                                                    | 70,973                                        | 68,112                                         | 8.77%                                                    | 59,716                              | 21,920                               | 36.71% |
| 12           | 5,245                                              | 4,909                                                                    | 68,525                                        | 65,644                                         | 9.11%                                                    | 58,484                              | 20,000                               | 34.20% |
| 13           | 5,199                                              | 4,818                                                                    | 51,915                                        | 49,233                                         | 8.79%                                                    | 43,721                              | 17,418                               | 39.84% |
| 14           | 3,997                                              | 3,726                                                                    | 45,474                                        | 43,275                                         | 8.95%                                                    | 38,672                              | 14,908                               | 38.55% |
| 15           | 3,022                                              | 2,761                                                                    | 42,353                                        | 40,598                                         | 9.53%                                                    | 35,629                              | 11,304                               | 31.73% |
| 16           | 2,372                                              | 2,142                                                                    | 44,648                                        | 43,283                                         | 10.35%                                                   | 37,650                              | 8,317                                | 22.09% |
| 17           | 1,945                                              | 1,824                                                                    | 38,401                                        | 37,229                                         | 10.35%                                                   | 32,254                              | 7,670                                | 23.78% |
| 18           | 3,552                                              | 3,305                                                                    | 40,824                                        | 38,965                                         | 9.00%                                                    | 34,679                              | 11,339                               | 32.70% |
| 19           | 686                                                | 636                                                                      | 26,238                                        | 25,833                                         | 13.22%                                                   | 22,608                              | 2,595                                | 11.48% |
| 20           | 2,086                                              | 1,951                                                                    | 36,258                                        | 34,998                                         | 10.05%                                                   | 31,254                              | 8,101                                | 25.92% |
| 21           | 1,895                                              | 1,801                                                                    | 19,306                                        | 18,332                                         | 9.27%                                                    | 16,532                              | 5,395                                | 32.63% |
| 22           | 758                                                | 689                                                                      | 20,085                                        | 19,655                                         | 11.98%                                                   | 17,265                              | 2,747                                | 15.91% |
| <b>Total</b> | 112,666                                            | 104,572                                                                  | 1,387,466                                     | 1,326,990                                      | 8.70%                                                    | 1,174,427                           | 421,010                              | 35.85% |

\*  $r^2$ : Estimated squared correlation between imputed and true genotypes.
