# Supplementary material for: Identification of Diabetic Retinopathy Genes through a Genome-Wide Association Study among Mexican-Americans from Starr County, Texas
Source: Hindawi journal article supplement (doi:10.1155/2010/861291), 2010-01-01
Supplement: f5 [file 861291.f5.pdf]

| Official symbol | Location      | GeneID | Official full name                                                        |
|-----------------|---------------|--------|---------------------------------------------------------------------------|
| ACE             | 17q23.3       | 1636   | angiotensin I converting enzyme 1                                         |
| ADAMTS5         | 21q21.3       | 11096  | ADAM metallopeptidase with thrombospondin type 1 motif 5                  |
| ADD1            | 4p16.3        | 118    | adducin 1                                                                 |
| ADRA2C          | 4p16          | 152    | adrenergic, alpha-2C-, receptor                                           |
| ADRB1           | 10q24-q26     | 153    | adrenergic, beta-1-, receptor                                             |
| ADRB3           | 8p12-p11.2    | 155    | adrenergic, beta-3-, receptor                                             |
| AGT             | 1q42-q43      | 183    | angiotensinogen                                                           |
| AGTR1           | 3q21-q25      | 185    | angiotensin II receptor, type 1                                           |
| AKR1B1          | 7q35          | 231    | aldo-keto reductase family 1, member B1 (aldose reductase)                |
| AKR1B10         | 7q33          | 57016  | aldo-keto reductase family 1, member B10 (aldose reductase)               |
| ALDH2           | 12q24.2       | 217    | aldehyde dehydrogenase 2 family (mitochondrial)                           |
| ANGPT1          | 8q22.3-q23    | 284    | angiopoietin 1                                                            |
| ANGPT2          | 8p23.1        | 285    | angiopoietin 2                                                            |
| ANKRD50         | 4q28.1        | 57182  | ankyrin repeat domain 50                                                  |
| APOB            | 2p24-p23      | 338    | apolipoprotein B                                                          |
| APOE            | 19q13.2       | 348    | apolipoprotein E                                                          |
| ARF6            | 14q21.3       | 382    | ADP-ribosylation factor 6                                                 |
| ARL6            | 3q11.2        | 84100  | ADP-ribosylation factor-like 6                                            |
| ARRB2           | 17p13         | 409    | arrestin, beta 2                                                          |
| ASIP            | 20q11.2-q12   | 434    | agouti signaling protein, nonagouti homolog (mouse)                       |
| ATP1A1          | 1p21          | 476    | ATPase, Na <sup>+</sup> /K <sup>+</sup> transporting, alpha 1 polypeptide |
| BAX             | 19q13.3-q13.4 | 581    | BCL2-associated X protein                                                 |
| BBS2            | 16q21         | 583    | Bardet-Biedl syndrome 2                                                   |
| CACNA1E         | 1q25-q31      | 777    | calcium channel, voltage-dependent, R type, alpha 1E subunit              |
| CAPN10          | 2q37.3        | 11132  | calpain 10                                                                |
| CAPN3           | 15q15.1-q21.1 | 825    | calpain 3, (p94)                                                          |
| CASP3           | 4q34          | 836    | caspase 3, apoptosis-related cysteine peptidase                           |
| CASP9           | 1p36.3-p36.1  | 842    | caspase 9, apoptosis-related cysteine peptidase                           |
| CAT             | 11p13         | 847    | catalase                                                                  |
| CCL2            | 17q11.2-q12   | 6347   | chemokine (C-C motif) ligand 2                                            |
| CCL3            | 17q11-q21     | 6348   | chemokine (C-C motif) ligand 3                                            |
| CCL5            | 17q11.2-q12   | 6352   | chemokine (C-C motif) ligand 5                                            |
| CCR5            | 3p21.31       | 1234   | chemokine (C-C motif) receptor 5                                          |

|          |                 |       |                                                        |
|----------|-----------------|-------|--------------------------------------------------------|
| CD4      | 12pter-p12      | 920   | CD4 molecule                                           |
| CD8A     | 2p12            | 925   | CD8a molecule                                          |
| CDC42BPA | 1q42.11         | 8476  | CDC42 binding protein kinase alpha                     |
| CDKN2A   | 9p21            | 1029  | cyclin-dependent kinase inhibitor 2A                   |
| CDKN2B   | 9p21            | 1030  | cyclin-dependent kinase inhibitor 2B                   |
| CFH      | 1q32            | 3075  | complement factor H                                    |
| CHD6     | 20q12           | 84181 | chromodomain helicase DNA binding protein 6            |
| COL4A1   | 13q34           | 1282  | collagen, type IV, alpha 1                             |
| COMT     | 22q11.21-q11.23 | 1312  | catechol-O-methyltransferase                           |
| CRH      | 8q13            | 1392  | corticotropin releasing hormone                        |
| CRX      | 19q13.3         | 1406  | cone-rod homeobox                                      |
| CXCL10   | 4q21            | 3627  | chemokine (C-X-C motif) ligand 10                      |
| CXCL12   | 10q11.1         | 6387  | chemokine (C-X-C motif) ligand 12                      |
| CXCL5    | 4q12-q13        | 6374  | chemokine (C-X-C motif) ligand 5                       |
| CYP11B2  | 8q21-q22        | 1585  | cytochrome P450, family 11, subfamily B, polypeptide 2 |
| DDIT4    | 10pter-q26.12   | 54541 | DNA-damage-inducible transcript 4                      |
| DGKA     | 12q13.3         | 1606  | diacylglycerol kinase, alpha 80kDa                     |
| DRD1     | 5q35.1          | 1812  | dopamine receptor D1                                   |
| DRD2     | 11q23           | 1813  | dopamine receptor D2                                   |
| DRD3     | 3q13.3          | 1814  | dopamine receptor D3                                   |
| DRD4     | 11p15.5         | 1815  | dopamine receptor D4                                   |
| E2F1     | 20q11.2         | 1869  | E2F transcription factor 1                             |
| EDN1     | 6p24.1          | 1906  | endothelin 1                                           |
| EDN2     | 1p34            | 1907  | endothelin 2                                           |
| EDN3     | 20q13.2-q13.3   | 1908  | endothelin 3                                           |
| EDNRA    | 4q31.23         | 1909  | endothelin receptor type A                             |
| EDNRB    | 13q22           | 1910  | endothelin receptor type B                             |
| EFNB2    | 13q33           | 1948  | ephrin-B2                                              |
| ENPP1    | 6q22-q23        | 5176  | ectonucleotide pyrophosphatase/phosphodiesterase 1     |
| EPHB4    | 7q22            | 2050  | EPH receptor B4                                        |
| EPO      | 7q22            | 2056  | erythropoietin                                         |
| EPOR     | 19p13.3-13.2    | 2057  | erythropoietin receptor                                |
| FGF2     | 4q26-q27        | 2247  | fibroblast growth factor 2 (basic)                     |
| FIZ1     | 19q13.42        | 84922 | FLT3-interacting zinc finger 1                         |

|          |               |       |                                                                    |
|----------|---------------|-------|--------------------------------------------------------------------|
| FLT1     | 13q12         | 2321  | fms-related tyrosine kinase 1                                      |
| GABBR1   | 6p21.31       | 2550  | gamma-aminobutyric acid (GABA) B receptor, 1                       |
| GAD1     | 2q31          | 2571  | glutamate decarboxylase 1 (brain, 67kDa)                           |
| GAPDHS   | 19q13.12      | 26330 | glyceraldehyde-3-phosphate dehydrogenase, spermatogenic            |
| GCG      | 2q36-q37      | 2641  | glucagon                                                           |
| GCGR     | 17q25         | 2642  | glucagon receptor                                                  |
| GCK      | 7p15.3-p15.1  | 2645  | glucokinase (hexokinase 4)                                         |
| GFAP     | 17q21         | 2670  | glial fibrillary acidic protein                                    |
| GHRL     | 3p26-p25      | 51738 | ghrelin/obestatin prepropeptide                                    |
| GJA1     | 6q21-q23.2    | 2697  | gap junction protein, alpha 1, 43kDa                               |
| GLP1R    | 6p21          | 2740  | glucagon-like peptide 1 receptor                                   |
| GMNN     | 6p22.2        | 51053 | geminin, DNA replication inhibitor                                 |
| GNAS     | 20q13.3       | 2778  | GNAS complex locus                                                 |
| GNB3     | 12p13         | 2784  | guanine nucleotide binding protein (G protein), beta polypeptide 3 |
| GP1BA    | 17pter-p12    | 2811  | glycoprotein Ib (platelet), alpha polypeptide                      |
| GPX4     | 19p13.3       | 2879  | glutathione peroxidase 4                                           |
| GRIK1    | 21q22.11      | 2897  | glutamate receptor, ionotropic, kainate 1                          |
| GRIN1    | 9q34.3        | 2902  | glutamate receptor, ionotropic, N-methyl D-aspartate 1             |
| GSK3A    | 19q13.2       | 2931  | glycogen synthase kinase 3 alpha                                   |
| GSK3B    | 3q13.3        | 2932  | glycogen synthase kinase 3 beta                                    |
| HIF1A    | 14q21-q24     | 3091  | hypoxia-inducible factor 1, alpha subunit                          |
| HLA-B    | 6p21.3        | 3106  | major histocompatibility complex, class I, B                       |
| HLA-C    | 6p21.3        | 3107  | major histocompatibility complex, class I, C                       |
| HLA-DQA1 | 6p21.3        | 3117  | major histocompatibility complex, class II, DQ alpha 1             |
| HNF4A    | 20q12-q13.1   | 3172  | hepatocyte nuclear factor 4, alpha                                 |
| HNT      | 11q25         | 50863 | neurotrimin                                                        |
| HP       | 16q22.1       | 3240  | haptoglobin                                                        |
| HSPG2    | 1p36.1-p34    | 3339  | heparan sulfate proteoglycan 2                                     |
| HTR1A    | 5q11.2-q13    | 3350  | 5-hydroxytryptamine (serotonin) receptor 1A                        |
| HTR1B    | 6q13          | 3351  | 5-hydroxytryptamine (serotonin) receptor 1B                        |
| HTR3B    | 11q23.1       | 9177  | 5-hydroxytryptamine (serotonin) receptor 3B                        |
| ICAM1    | 19p13.3-p13.2 | 3383  | intercellular adhesion molecule 1                                  |
| IGF1R    | 15q26.3       | 3480  | insulin-like growth factor 1 receptor                              |
| IGHM     | 14q32.33      | 3507  | immunoglobulin heavy constant mu                                   |

|         |               |       |                                                                           |
|---------|---------------|-------|---------------------------------------------------------------------------|
| IL1A    | 2q14          | 3552  | interleukin 1, alpha                                                      |
| IL2     | 4q26-q27      | 3558  | interleukin 2                                                             |
| IL6     | 7p21          | 3569  | interleukin 6 (interferon, beta 2)                                        |
| IL8RB   | 2q35          | 3579  | interleukin 8 receptor, beta                                              |
| IMPG2   | 3q12.2-q12.3  | 50939 | interphotoreceptor matrix proteoglycan 2                                  |
| ING4    | 12p13.31      | 51147 | inhibitor of growth family, member 4                                      |
| INS     | 11p15.5       | 3630  | insulin                                                                   |
| INSR    | 19p13.3-p13.2 | 3643  | insulin receptor                                                          |
| IRS1    | 2q36          | 3667  | insulin receptor substrate 1                                              |
| IRS2    | 13q34         | 8660  | insulin receptor substrate 2                                              |
| ITGA2   | 5q23-q31      | 3673  | integrin, alpha 2                                                         |
| ITGB2   | 21q22.3       | 3689  | integrin, beta 2                                                          |
| ITGB5   | 3q21.2        | 3693  | integrin, beta 5                                                          |
| KCNJ11  | 11p15.1       | 3767  | potassium inwardly-rectifying channel, subfamily J, member 11             |
| KCNS1   | 20q12         | 3787  | potassium voltage-gated channel, delayed-rectifier, subfamily S, member 1 |
| KDR     | 4q11-q12      | 3791  | kinase insert domain receptor                                             |
| KHDRBS3 | 8q24.2        | 10656 | KH domain containing, RNA binding, signal transduction associated 3       |
| KLK1    | 19q13.3       | 3816  | kallikrein 1                                                              |
| LEP     | 7q31.3        | 3952  | leptin                                                                    |
| LEPR    | 1p31          | 3953  | leptin receptor                                                           |
| LGALS3  | 14q21-q22     | 3958  | lectin, galactoside-binding, soluble, 3                                   |
| LPL     | 8p22          | 4023  | lipoprotein lipase                                                        |
| LTA     | 6p21.3        | 4049  | lymphotoxin alpha (TNF superfamily, member 1)                             |
| MAP2K2  | 19p13.3       | 5605  | mitogen-activated protein kinase kinase 2                                 |
| MAPK3   | 16p11.2       | 5595  | mitogen-activated protein kinase 3                                        |
| MEF2A   | 15q26         | 4205  | myocyte enhancer factor 2A                                                |
| MEF2C   | 5q14          | 4208  | myocyte enhancer factor 2C                                                |
| MMP3    | 11q22.3       | 4314  | matrix metalloproteinase 3                                                |
| MPO     | 17q23.1       | 4353  | myeloperoxidase                                                           |
| NFKB1   | 4q24          | 4790  | nuclear factor of kappa light polypeptide gene enhancer in B-cells 1      |
| NLGN1   | 3q26.31       | 22871 | neuroligin 1                                                              |
| NOS3    | 7q36          | 4846  | nitric oxide synthase 3                                                   |
| NOX3    | 6q25.1-q26    | 50508 | NADPH oxidase 3                                                           |
| NOX4    | 11q14.2-q21   | 50507 | NADPH oxidase 4                                                           |

|          |               |       |                                                                       |
|----------|---------------|-------|-----------------------------------------------------------------------|
| NOX5     | 15q23         | 79400 | NADPH oxidase, EF-hand calcium binding domain 5                       |
| NOXA1    | 9q34.3        | 10811 | NADPH oxidase activator 1                                             |
| NPY      | 7p15.1        | 4852  | neuropeptide Y                                                        |
| NR2E1    | 6q21          | 7101  | nuclear receptor subfamily 2, group E, member 1                       |
| NR2E3    | 15q22.32      | 10002 | nuclear receptor subfamily 2, group E, member 3                       |
| NR2F2    | 15q26         | 7026  | nuclear receptor subfamily 2, group F, member 2                       |
| NXPH1    | 7p22          | 30010 | neurexophilin 1                                                       |
| OLR1     | 12p13.2-p12.3 | 4973  | oxidized low density lipoprotein receptor 1                           |
| OTX2     | 14q21-q22     | 5015  | orthodenticle homeobox 2                                              |
| PDGFA    | 7p22          | 5154  | platelet-derived growth factor alpha polypeptide                      |
| PDGFB    | 22q13.1       | 5155  | platelet-derived growth factor beta polypeptide                       |
| PECAM1   | 17q23         | 5175  | platelet/endothelial cell adhesion molecule                           |
| PIGF     | 2p21-p16      | 5281  | phosphatidylinositol glycan anchor biosynthesis, class F              |
| PLA2G4A  | 1q25          | 5321  | phospholipase A2, group IVA                                           |
| PNMT     | 17q21-q22     | 5409  | phenylethanolamine N-methyltransferase                                |
| PON1     | 7q21.3        | 5444  | paraoxonase 1                                                         |
| PPARG    | 3p25          | 5468  | peroxisome proliferator-activated receptor gamma                      |
| PPARGC1A | 4p15.1        | 10891 | peroxisome proliferator-activated receptor gamma, coactivator 1 alpha |
| PRKCB1   | 16p11.2       | 5579  | protein kinase C, beta 1                                              |
| PRKCE    | 2p21          | 5581  | protein kinase C, epsilon                                             |
| PROS1    | 3q11.2        | 5627  | protein S (alpha)                                                     |
| PRPF31   | 19q13.42      | 26121 | PRP31 pre-mRNA processing factor 31 homolog                           |
| PTGES    | 9q34.3        | 9536  | prostaglandin E synthase                                              |
| PTGIS    | 20q13.13      | 5740  | prostaglandin I2 (prostacyclin) synthase                              |
| PTGS1    | 9q32-q33.3    | 5742  | prostaglandin-endoperoxide synthase 1                                 |
| PTGS2    | 1q25.2-q25.3  | 5743  | prostaglandin-endoperoxide synthase 2                                 |
| PTK2     | 8q24-qter     | 5747  | PTK2 protein tyrosine kinase 2                                        |
| PXN      | 12q24.31      | 5829  | paxillin                                                              |
| RAGE     | 14q32         | 5891  | renal tumor antigen                                                   |
| RALGPS2  | 1q25.2        | 55103 | Ral GEF with PH domain and SH3 binding motif 2                        |
| RAPGEF1  | 9q34.3        | 2889  | Rap guanine nucleotide exchange factor (GEF) 1                        |
| REN      | 1q32          | 5972  | renin                                                                 |
| RGMA     | 15q26.1       | 56963 | RGM domain family, member A                                           |
| ROBO2    | 3p12.3        | 6092  | roundabout, axon guidance receptor, homolog 2                         |

|          |              |        |                                                    |
|----------|--------------|--------|----------------------------------------------------|
| RRAD     | 16q22        | 6236   | Ras-related associated with diabetes               |
| RXRA     | 9q34.3       | 6256   | retinoid X receptor, alpha                         |
| SCNN1A   | 12p13        | 6337   | sodium channel, nonvoltage-gated 1 alpha           |
| SELE     | 1q22-q25     | 6401   | selectin E                                         |
| SELP     | 1q22-q25     | 6403   | selectin P                                         |
| SERPINE1 | 7q21.3-q22   | 5054   | serpin peptidase inhibitor, clade E member 1       |
| SERPINF1 | 17p13.1      | 5176   | serpin peptidase inhibitor, clade F member 1       |
| SGK1     | 6q23         | 6446   | serum/glucocorticoid regulated kinase 1            |
| SLC1A2   | 11p13-p12    | 6506   | solute carrier family 1 member 2                   |
| SLC1A3   | 5p13         | 6507   | solute carrier family 1 member 3                   |
| SLC24A3  | 20p13        | 57419  | solute carrier family 24 member 3                  |
| SLC2A1   | 1p35-p31.3   | 6513   | solute carrier family 2 member 1                   |
| SLC2A11  | 22q11.2      | 66035  | solute carrier family 2 member 11                  |
| SLC2A2   | 3q26.1-q26.2 | 6514   | solute carrier family 2 member 2                   |
| SLC2A4   | 17p13        | 6517   | solute carrier family 2 member 4                   |
| SLC6A3   | 5p15.3       | 6531   | solute carrier family 6 member 3                   |
| SLC6A6   | 3p25-p24     | 6533   | solute carrier family 6 member 6                   |
| SMAD3    | 15q22.33     | 4088   | SMAD family member 3                               |
| SNX16    | 8q21.13      | 64089  | sorting nexin 16                                   |
| SOD1     | 21q22.1      | 6647   | superoxide dismutase 1, soluble                    |
| SOD2     | 6q25.3       | 6648   | superoxide dismutase 2, mitochondrial              |
| SORD     | 15q15.3      | 6652   | sorbitol dehydrogenase                             |
| STAT3    | 17q21.31     | 6774   | signal transducer and activator of transcription 3 |
| SUMO4    | 6q25         | 387082 | SMT3 suppressor of mif two 3 homolog 4             |
| TAS2R1   | 5p15         | 50834  | taste receptor, type 2, member 1                   |
| TF       | 3q22.1       | 7018   | transferrin                                        |
| TFRC     | 3q29         | 7037   | transferrin receptor (p90, CD71)                   |
| TGM2     | 20q12        | 7052   | transglutaminase 2                                 |
| TGM3     | 20q11.2      | 7053   | transglutaminase 3                                 |
| TNF      | 6p21.3       | 7124   | tumor necrosis factor                              |
| TPH2     | 12q21.1      | 121278 | tryptophan hydroxylase 2                           |
| TULP3    | 12p13.3      | 7289   | tubby like protein 3                               |
| UBE2I    | 16p13.3      | 7329   | ubiquitin-conjugating enzyme E2I                   |
| VCAM1    | 1p32-p31     | 7412   | vascular cell adhesion molecule 1                  |

|       |         |       |                                                       |
|-------|---------|-------|-------------------------------------------------------|
| VEGFA | 6p12    | 7422  | vascular endothelial growth factor A                  |
| VEGFB | 11q13   | 7423  | vascular endothelial growth factor B                  |
| VPS45 | 1q21.2  | 11311 | vacuolar protein sorting 45 homolog                   |
| WNK1  | 12p13.3 | 65125 | WNK lysine deficient protein kinase 1                 |
| WNT5B | 12p13.3 | 81029 | wingless-type MMTV integration site family, member 5B |
